# Supplementary material for: Independent Prognostic Potential of GNPNAT1 in Lung Adenocarcinoma
Source: PubMed Central journal article supplement (PMC7648248; doi:10.1155/2020/8851437), 2020-10-29

# Figure S1

**A****CDK1**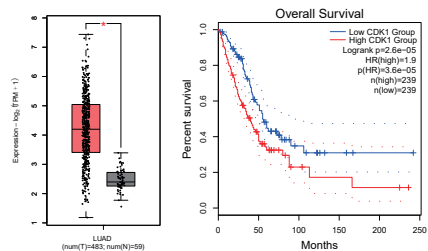**B****PLK1**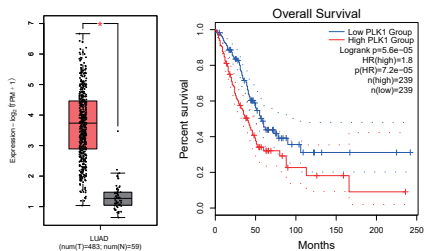**C****AURKB**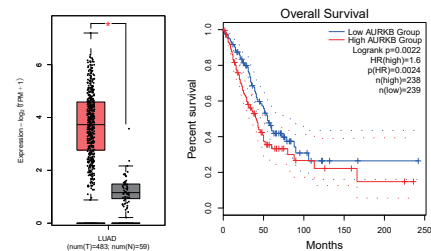**D****CDK2**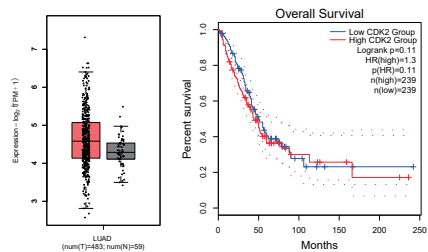**E****ATM**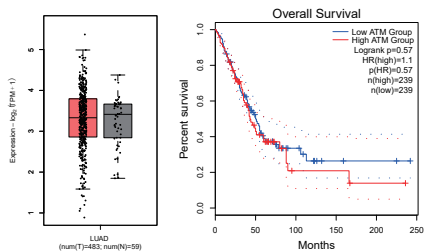

Figure S2

A

Survival heat map of B cell markers positively correlated with GNPAT1

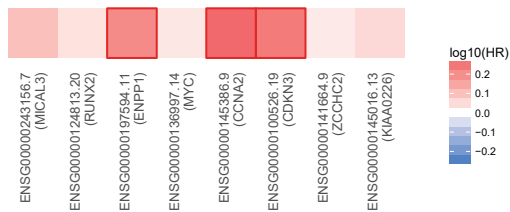

B

Survival heat map of B cell markers negatively correlated with GNPAT1

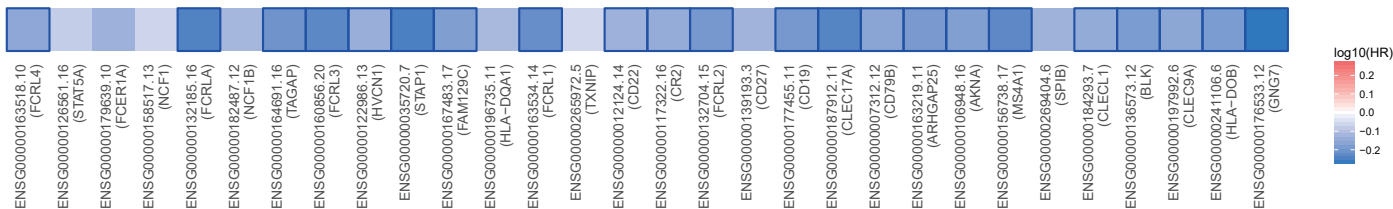

Supplement: 8851437.f1.pdf [file 8851437.f1.pdf]
