# Supplementary material for: Independent Prognostic Potential of GNPNAT1 in Lung Adenocarcinoma
Source: PubMed Central journal article supplement (PMC7648248; doi:10.1155/2020/8851437), 2020-10-29
Supplement: 8851437.f2.pdf [file 8851437.f2.pdf]

**Table S1. Tumor mutation burden (TMB) scores of each sample in the TCGA-LUAD cohort.**

| id                           | TMB         |
|------------------------------|-------------|
| TCGA-78-7153-01A-11D-2036-08 | 2.184210526 |
| TCGA-73-4670-01A-01D-1265-08 | 11.65789474 |
| TCGA-78-7145-01A-11D-2036-08 | 6.052631579 |
| TCGA-49-4506-01A-01D-1265-08 | 2.710526316 |
| TCGA-17-Z055-01A-01W-0747-08 | 11.92105263 |
| TCGA-55-A491-01A-11D-A24D-08 | 10.5        |
| TCGA-55-7913-01B-11D-2238-08 | 9.657894737 |
| TCGA-05-4402-01A-01D-1265-08 | 1.710526316 |
| TCGA-55-8203-01A-11D-2238-08 | 12.86842105 |
| TCGA-91-6829-01A-21D-1855-08 | 18.34210526 |
| TCGA-97-A4M7-01A-11D-A24P-08 | 8           |
| TCGA-44-7659-01A-11D-2063-08 | 4.421052632 |
| TCGA-75-6214-01A-41D-1945-08 | 19.65789474 |
| TCGA-62-A46P-01A-11D-A24D-08 | 8.105263158 |
| TCGA-05-4398-01A-01D-1265-08 | 18.13157895 |
| TCGA-78-7540-01A-11D-2063-08 | 0.973684211 |
| TCGA-L9-A50W-01A-12D-A397-08 | 0.815789474 |
| TCGA-64-1681-01A-11D-2063-08 | 1.368421053 |
| TCGA-17-Z028-01A-01W-0746-08 | 12.94736842 |

|                              |             |
|------------------------------|-------------|
| TCGA-55-8507-01A-11D-2393-08 | 29.63157895 |
| TCGA-NJ-A7XG-01A-12D-A397-08 | 0.894736842 |
| TCGA-49-4490-01A-21D-1855-08 | 0.710526316 |
| TCGA-55-8506-01A-11D-2393-08 | 51.84210526 |
| TCGA-44-5644-01A-21D-2036-08 | 30          |
| TCGA-86-8054-01A-11D-2238-08 | 6.815789474 |
| TCGA-44-A4SS-01A-11D-A24P-08 | 10.07894737 |
| TCGA-49-4494-01A-01D-1265-08 | 5.394736842 |
| TCGA-55-8092-01A-11D-2238-08 | 16.07894737 |
| TCGA-69-7764-01A-11D-2167-08 | 2.447368421 |
| TCGA-86-7713-01A-11D-2063-08 | 4.868421053 |
| TCGA-44-2662-01A-01D-A271-08 | 4.657894737 |
| TCGA-91-6828-01A-11D-1855-08 | 7.342105263 |
| TCGA-55-8094-01A-11D-2238-08 | 14.36842105 |
| TCGA-17-Z025-01A-01W-0746-08 | 6.789473684 |
| TCGA-97-A4LX-01A-11D-A24P-08 | 2.789473684 |
| TCGA-44-2659-01A-01D-0969-08 | 12.34210526 |
| TCGA-53-7624-01A-11D-2063-08 | 25.60526316 |
| TCGA-75-5126-01A-01D-1753-08 | 14.39473684 |
| TCGA-78-7537-01A-11D-2063-08 | 4.315789474 |
| TCGA-55-6983-01A-11D-1945-08 | 2.289473684 |
| TCGA-35-3615-01A-01D-1040-01 | 3.736842105 |

|                              |             |
|------------------------------|-------------|
| TCGA-97-7941-01A-11D-2184-08 | 2.184210526 |
| TCGA-05-5425-01A-02D-1625-08 | 14.42105263 |
| TCGA-78-7161-01A-11D-2036-08 | 5.473684211 |
| TCGA-69-7760-01A-11D-2167-08 | 2.026315789 |
| TCGA-71-6725-01A-11D-1855-08 | 1.5         |
| TCGA-50-5044-01A-21D-1855-08 | 2.394736842 |
| TCGA-55-8208-01A-11D-2238-08 | 3.236842105 |
| TCGA-75-6212-01A-11D-1753-08 | 0.526315789 |
| TCGA-50-6595-01A-12D-1855-08 | 1.394736842 |
| TCGA-55-A57B-01A-12D-A397-08 | 0.894736842 |
| TCGA-86-8075-01A-11D-2238-08 | 0.973684211 |
| TCGA-L9-A8F4-01A-11D-A397-08 | 21.60526316 |
| TCGA-55-6642-01A-11D-1855-08 | 3.815789474 |
| TCGA-05-4384-01A-01D-1753-08 | 3.5         |
| TCGA-55-A48X-01A-11D-A24D-08 | 8.5         |
| TCGA-17-Z016-01A-01W-0746-08 | 9.815789474 |
| TCGA-44-3917-01A-01D-A271-08 | 6.026315789 |
| TCGA-05-4249-01A-01D-1105-08 | 9.789473684 |
| TCGA-17-Z057-01A-01W-0747-08 | 10.76315789 |
| TCGA-49-4505-01A-01D-1931-08 | 5.815789474 |
| TCGA-69-8254-01A-11D-2284-08 | 2.289473684 |
| TCGA-49-4512-01A-21D-1855-08 | 0.921052632 |

|                              |             |
|------------------------------|-------------|
| TCGA-J2-A4AD-01A-11D-A24D-08 | 7.973684211 |
| TCGA-91-A4BD-01A-11D-A24D-08 | 0.736842105 |
| TCGA-55-6969-01A-11D-1945-08 | 11.21052632 |
| TCGA-86-7954-01A-11D-2184-08 | 4.473684211 |
| TCGA-97-8172-01A-11D-2284-08 | 7.289473684 |
| TCGA-97-8547-01A-11D-2393-08 | 1.605263158 |
| TCGA-05-5423-01A-01D-1625-08 | 4.5         |
| TCGA-55-8097-01A-11D-2238-08 | 3.026315789 |
| TCGA-NJ-A4YF-01A-12D-A25L-08 | 18.57894737 |
| TCGA-86-8279-01A-11D-2284-08 | 15.76315789 |
| TCGA-55-7903-01A-11D-2167-08 | 4.026315789 |
| TCGA-05-4397-01A-01D-1265-08 | 25.86842105 |
| TCGA-J2-A4AG-01A-11D-A24D-08 | 1.789473684 |
| TCGA-17-Z009-01A-01W-0746-08 | 0.184210526 |
| TCGA-17-Z045-01A-01W-0746-08 | 19.89473684 |
| TCGA-62-A46O-01A-11D-A24D-08 | 27.28947368 |
| TCGA-44-6774-01A-21D-1855-08 | 8.578947368 |
| TCGA-55-8621-01A-11D-2393-08 | 0.184210526 |
| TCGA-17-Z002-01A-01W-0746-08 | 0.105263158 |
| TCGA-49-AARO-01A-12D-A410-08 | 15.76315789 |
| TCGA-67-3770-01A-01D-0969-08 | 6.736842105 |
| TCGA-NJ-A4YI-01A-11D-A25L-08 | 14.13157895 |

|                              |             |
|------------------------------|-------------|
| TCGA-17-Z010-01A-01W-0746-08 | 8.157894737 |
| TCGA-MP-A4TF-01A-11D-A25L-08 | 11.81578947 |
| TCGA-44-2655-01A-01D-1553-08 | 3.605263158 |
| TCGA-95-A4VK-01A-11D-A25L-08 | 7.789473684 |
| TCGA-67-3772-01A-01W-0928-08 | 1.368421053 |
| TCGA-55-6986-01A-11D-1945-08 | 0.605263158 |
| TCGA-NJ-A55O-01A-11D-A25L-08 | 2.289473684 |
| TCGA-64-5775-01A-01D-1625-08 | 15.47368421 |
| TCGA-78-7535-01A-11D-2063-08 | 5.289473684 |
| TCGA-73-4668-01A-01D-1265-08 | 17.71052632 |
| TCGA-62-8397-01A-11D-2323-08 | 0.894736842 |
| TCGA-05-4432-01A-01D-1265-08 | 14.76315789 |
| TCGA-MP-A4T2-01A-11D-A24P-08 | 1.710526316 |
| TCGA-91-6830-01A-11D-1945-08 | 4.526315789 |
| TCGA-91-A4BC-01A-11D-A24D-08 | 10.65789474 |
| TCGA-78-7155-01A-11D-2036-08 | 48.10526316 |
| TCGA-S2-AA1A-01A-12D-A397-08 | 3.157894737 |
| TCGA-05-4410-01A-21D-1855-08 | 28.07894737 |
| TCGA-75-5122-01A-01D-1753-08 | 2.368421053 |
| TCGA-49-6744-01A-11D-1855-08 | 3.842105263 |
| TCGA-4B-A93V-01A-11D-A397-08 | 4.368421053 |
| TCGA-05-4395-01A-01D-1265-08 | 8.578947368 |

|                              |             |
|------------------------------|-------------|
| TCGA-50-5932-01A-11D-1753-08 | 2.342105263 |
| TCGA-97-A4M2-01A-12D-A24P-08 | 0.131578947 |
| TCGA-69-7973-01A-11D-2184-08 | 8.052631579 |
| TCGA-55-8090-01A-11D-2238-08 | 2.815789474 |
| TCGA-78-8648-01A-11D-2393-08 | 0.026315789 |
| TCGA-38-6178-01A-11D-1753-08 | 1.052631579 |
| TCGA-NJ-A4YQ-01A-11D-A25L-08 | 28.97368421 |
| TCGA-05-4250-01A-01D-1105-08 | 10.97368421 |
| TCGA-78-7220-01A-11D-2036-08 | 26.5        |
| TCGA-78-7150-01A-21D-2036-08 | 12.31578947 |
| TCGA-64-5774-01A-01D-1625-08 | 4.289473684 |
| TCGA-J2-8192-01A-11D-2238-08 | 1.736842105 |
| TCGA-78-7162-01A-21D-2063-08 | 1.526315789 |
| TCGA-44-6778-01A-11D-1855-08 | 11.13157895 |
| TCGA-05-5428-01A-01D-1625-08 | 11.28947368 |
| TCGA-55-A48Z-01A-12D-A24P-08 | 1.315789474 |
| TCGA-91-7771-01A-11D-2167-08 | 4.052631579 |
| TCGA-NJ-A55A-01A-11D-A25L-08 | 1.052631579 |
| TCGA-62-A46R-01A-11D-A24D-08 | 4.552631579 |
| TCGA-86-8672-01A-21D-2393-08 | 8.236842105 |
| TCGA-73-4666-01A-01D-1265-08 | 11.92105263 |
| TCGA-97-7552-01A-11D-2036-08 | 0.552631579 |

|                              |             |
|------------------------------|-------------|
| TCGA-86-A4JF-01A-11D-A24P-08 | 34.92105263 |
| TCGA-44-7670-01A-11D-2063-08 | 33.42105263 |
| TCGA-55-6982-01A-11D-1945-08 | 4.657894737 |
| TCGA-62-A46Y-01A-11D-A24D-08 | 1.026315789 |
| TCGA-17-Z020-01A-01W-0746-08 | 2.078947368 |
| TCGA-91-6840-01A-11D-1945-08 | 3.447368421 |
| TCGA-17-Z005-01A-01W-0746-08 | 3.710526316 |
| TCGA-49-4507-01A-01D-1265-08 | 5.684210526 |
| TCGA-55-7907-01A-11D-2167-08 | 35.28947368 |
| TCGA-62-8399-01A-21D-2323-08 | 15.15789474 |
| TCGA-49-4487-01A-21D-1855-08 | 6.842105263 |
| TCGA-86-8673-01A-11D-2393-08 | 13.47368421 |
| TCGA-67-6217-01A-11D-1753-08 | 4.578947368 |
| TCGA-55-6980-01A-11D-1945-08 | 0.315789474 |
| TCGA-55-A4DF-01A-11D-A24D-08 | 21.28947368 |
| TCGA-49-AAR3-01A-11D-A410-08 | 1.947368421 |
| TCGA-44-A47A-01A-21D-A24D-08 | 5           |
| TCGA-55-6984-01A-11D-1945-08 | 0.657894737 |
| TCGA-L9-A444-01A-21D-A24D-08 | 14.92105263 |
| TCGA-93-A4JQ-01A-11D-A24P-08 | 1.289473684 |
| TCGA-MP-A4TE-01A-22D-A25L-08 | 4.289473684 |
| TCGA-05-4426-01A-01D-1265-08 | 1.368421053 |

|                              |             |
|------------------------------|-------------|
| TCGA-05-4425-01A-01D-1753-08 | 1.210526316 |
| TCGA-55-7227-01A-11D-2036-08 | 5.052631579 |
| TCGA-97-8176-01A-11D-2393-08 | 4.263157895 |
| TCGA-73-4675-01A-01D-1265-08 | 1.921052632 |
| TCGA-55-6975-01A-11D-1945-08 | 2.342105263 |
| TCGA-44-6147-01A-31D-A27T-08 | 1.447368421 |
| TCGA-78-7633-01A-11D-2063-08 | 3.552631579 |
| TCGA-44-A47F-01A-11D-A24D-08 | 2.105263158 |
| TCGA-MP-A4T4-01A-11D-A25L-08 | 8.605263158 |
| TCGA-17-Z033-01A-01W-0746-08 | 3.210526316 |
| TCGA-17-Z017-01A-01W-0746-08 | 6.605263158 |
| TCGA-55-6979-01A-11D-1945-08 | 2.657894737 |
| TCGA-93-A4JP-01A-11D-A24P-08 | 0.552631579 |
| TCGA-L4-A4E5-01A-11D-A24P-08 | 10.47368421 |
| TCGA-55-6985-01A-11D-1945-08 | 12.28947368 |
| TCGA-44-3918-01A-01D-A271-08 | 22.42105263 |
| TCGA-86-8358-01A-11D-2323-08 | 34.34210526 |
| TCGA-62-A46U-01A-11D-A24D-08 | 1.078947368 |
| TCGA-86-7955-01A-11D-2184-08 | 9.394736842 |
| TCGA-49-AAR9-01A-21D-A410-08 | 20.71052632 |
| TCGA-86-A4P7-01A-11D-A24P-08 | 1.052631579 |
| TCGA-93-8067-01A-11D-2284-08 | 14.94736842 |



|                              |             |
|------------------------------|-------------|
| TCGA-78-7167-01A-11D-2063-08 | 5.552631579 |
| TCGA-91-8497-01A-11D-2393-08 | 1.210526316 |
| TCGA-67-6216-01A-11D-1753-08 | 0.5         |
| TCGA-97-A4M5-01A-11D-A24P-08 | 3.210526316 |
| TCGA-49-AAR0-01A-21D-A397-08 | 2.736842105 |
| TCGA-55-A4DG-01A-11D-A24D-08 | 19.26315789 |
| TCGA-17-Z062-01A-01W-0747-08 | 8.947368421 |
| TCGA-78-7149-01A-11D-2036-08 | 3.815789474 |
| TCGA-50-5051-01A-21D-1855-08 | 3.184210526 |
| TCGA-O1-A52J-01A-11D-A25L-08 | 5.078947368 |
| TCGA-55-8616-01A-11D-2393-08 | 14.18421053 |
| TCGA-35-4122-01A-01D-1105-08 | 6.973684211 |
| TCGA-MP-A4T8-01A-11D-A24P-08 | 3.631578947 |
| TCGA-44-2665-01A-01D-A271-08 | 0.921052632 |
| TCGA-55-8505-01A-11D-2393-08 | 1           |
| TCGA-50-5068-01A-01D-1625-08 | 2.263157895 |
| TCGA-17-Z051-01A-01W-0747-08 | 7.736842105 |
| TCGA-99-8032-01A-11D-2238-08 | 10.84210526 |
| TCGA-86-8073-01A-11D-2238-08 | 39.76315789 |
| TCGA-55-7995-01A-11D-2184-08 | 20.34210526 |
| TCGA-17-Z049-01A-01W-0746-08 | 19.05263158 |
| TCGA-MN-A4N1-01A-11D-A24P-08 | 13.02631579 |

|                              |             |
|------------------------------|-------------|
| TCGA-17-Z014-01A-01W-0746-08 | 11.39473684 |
| TCGA-86-8055-01A-11D-2238-08 | 0.815789474 |
| TCGA-55-6981-01A-11D-1945-08 | 1.342105263 |
| TCGA-78-7163-01A-12D-2063-08 | 0.578947368 |
| TCGA-55-8091-01A-11D-2238-08 | 0.552631579 |
| TCGA-05-4396-01A-21D-1855-08 | 7.894736842 |
| TCGA-50-5946-01A-11D-1753-08 | 19.76315789 |
| TCGA-38-A44F-01A-11D-A24D-08 | 0.157894737 |
| TCGA-86-8669-01A-11D-2393-08 | 3.736842105 |
| TCGA-NJ-A4YP-01A-11D-A25L-08 | 14.84210526 |
| TCGA-44-2668-01A-01D-A271-08 | 8.368421053 |
| TCGA-55-A493-01A-11D-A24D-08 | 5.236842105 |
| TCGA-50-5045-01A-01D-1625-08 | 6.315789474 |
| TCGA-95-A4VN-01A-11D-A25L-08 | 9.947368421 |
| TCGA-93-7347-01A-11D-2184-08 | 2.789473684 |
| TCGA-44-2657-01A-01D-1105-08 | 10.23684211 |
| TCGA-67-3771-01A-01D-1040-01 | 30.97368421 |
| TCGA-55-8204-01A-11D-2238-08 | 5.868421053 |
| TCGA-38-4630-01A-01D-1265-08 | 4           |
| TCGA-75-5125-01A-01D-1753-08 | 4.236842105 |
| TCGA-86-6851-01A-11D-1945-08 | 25.23684211 |
| TCGA-38-7271-01A-11D-2036-08 | 0.815789474 |

|                              |             |
|------------------------------|-------------|
| TCGA-80-5607-01A-31D-1945-08 | 3.763157895 |
| TCGA-17-Z021-01A-01W-0746-08 | 2.631578947 |
| TCGA-99-8033-01A-11D-2238-08 | 4.763157895 |
| TCGA-86-8074-01A-11D-2238-08 | 1.921052632 |
| TCGA-86-8585-01A-11D-2393-08 | 16.55263158 |
| TCGA-MP-A4SV-01A-11D-A24P-08 | 6.5         |
| TCGA-50-6592-01A-11D-1753-08 | 7.210526316 |
| TCGA-17-Z056-01A-01W-0747-08 | 8.578947368 |
| TCGA-49-4510-01A-01D-1265-08 | 1.342105263 |
| TCGA-L9-A443-01A-12D-A24D-08 | 7.078947368 |
| TCGA-50-6597-01A-11D-1855-08 | 1.578947368 |
| TCGA-49-AAR4-01A-12D-A410-08 | 9           |
| TCGA-97-7547-01A-11D-2036-08 | 4.789473684 |
| TCGA-38-4626-01A-01D-1553-08 | 2.263157895 |
| TCGA-75-6205-01A-11D-1753-08 | 0.605263158 |
| TCGA-67-4679-01B-01D-1753-08 | 8.763157895 |
| TCGA-55-1596-01A-01D-1040-01 | 5.684210526 |
| TCGA-MP-A4TC-01A-11D-A24P-08 | 7.526315789 |
| TCGA-05-5420-01A-01D-1625-08 | 1.894736842 |
| TCGA-97-8552-01A-11D-2393-08 | 0.631578947 |
| TCGA-86-7701-01A-11D-2167-08 | 5.394736842 |
| TCGA-44-7671-01A-11D-2063-08 | 7.368421053 |

|                              |             |
|------------------------------|-------------|
| TCGA-55-1594-01A-01D-1040-01 | 6.157894737 |
| TCGA-86-7953-01A-11D-2184-08 | 1.315789474 |
| TCGA-50-5933-01A-11D-1753-08 | 13.07894737 |
| TCGA-78-7146-01A-11D-2036-08 | 11.52631579 |
| TCGA-MP-A4TA-01A-21D-A24P-08 | 9.131578947 |
| TCGA-78-7152-01A-11D-2036-08 | 4.947368421 |
| TCGA-55-8615-01A-11D-2393-08 | 3.842105263 |
| TCGA-91-8499-01A-11D-2393-08 | 10.28947368 |
| TCGA-53-7626-01A-12D-2063-08 | 11.21052632 |
| TCGA-38-4625-01A-01D-1553-08 | 17.13157895 |
| TCGA-55-7574-01A-11D-2036-08 | 3.315789474 |
| TCGA-97-7553-01A-21D-2036-08 | 0.789473684 |
| TCGA-50-5931-01A-11D-1753-08 | 9.184210526 |
| TCGA-05-4415-01A-22D-1855-08 | 6.184210526 |
| TCGA-97-7937-01A-11D-2167-08 | 13.39473684 |
| TCGA-62-A470-01A-11D-A24D-08 | 3.5         |
| TCGA-17-Z030-01A-01W-0746-08 | 13.13157895 |
| TCGA-95-7947-01A-11D-2184-08 | 16.60526316 |
| TCGA-55-8206-01A-11D-2238-08 | 0.789473684 |
| TCGA-MP-A5C7-01A-11D-A25L-08 | 2.315789474 |
| TCGA-91-6836-01A-21D-1855-08 | 15.07894737 |
| TCGA-17-Z050-01A-01W-0747-08 | 4.657894737 |

|                              |             |
|------------------------------|-------------|
| TCGA-44-A4SU-01A-11D-A24P-08 | 3.552631579 |
| TCGA-78-7159-01A-11D-2036-08 | 9.184210526 |
| TCGA-05-4405-01A-21D-1855-08 | 9.289473684 |
| TCGA-73-A9RS-01A-11D-A410-08 | 28.92105263 |
| TCGA-73-7498-01A-12D-2184-08 | 3.552631579 |
| TCGA-05-4434-01A-01D-1265-08 | 0.921052632 |
| TCGA-55-8302-01A-11D-2323-08 | 16.86842105 |
| TCGA-86-8674-01A-21D-2393-08 | 9.210526316 |
| TCGA-55-8299-01A-11D-2284-08 | 0.421052632 |
| TCGA-55-A48Y-01A-11D-A24D-08 | 8.394736842 |
| TCGA-17-Z023-01A-01W-0746-08 | 11.23684211 |
| TCGA-50-5930-01A-11D-1753-08 | 32.02631579 |
| TCGA-55-8207-01A-11D-2238-08 | 9.921052632 |
| TCGA-J2-8194-01A-11D-2238-08 | 4.5         |
| TCGA-95-7944-01A-11D-2184-08 | 7.342105263 |
| TCGA-MP-A4TI-01A-21D-A24P-08 | 4.210526316 |
| TCGA-55-8512-01A-11D-2393-08 | 1.157894737 |
| TCGA-99-AA5R-01A-11D-A397-08 | 0.131578947 |
| TCGA-93-A4JN-01A-11D-A24P-08 | 1.815789474 |
| TCGA-64-5779-01A-01D-1625-08 | 10.55263158 |
| TCGA-55-5899-01A-11D-1625-08 | 13.55263158 |
| TCGA-05-5429-01A-01D-1625-08 | 0.947368421 |

|                              |             |
|------------------------------|-------------|
| TCGA-55-8619-01A-11D-2393-08 | 0.131578947 |
| TCGA-73-4659-01A-01D-1265-08 | 6.526315789 |
| TCGA-49-AAR2-01A-11D-A397-08 | 12.31578947 |
| TCGA-97-7546-01A-11D-2036-08 | 8.184210526 |
| TCGA-55-7911-01A-11D-2167-08 | 6.052631579 |
| TCGA-17-Z013-01A-01W-0746-08 | 1.789473684 |
| TCGA-44-3919-01A-02D-1458-08 | 1.026315789 |
| TCGA-17-Z058-01A-01W-0747-08 | 7.657894737 |
| TCGA-49-AAQV-01A-11D-A397-08 | 0.894736842 |
| TCGA-86-7714-01A-12D-2167-08 | 0.131578947 |
| TCGA-64-5815-01A-01D-1625-08 | 4.894736842 |
| TCGA-64-1677-01A-01W-0928-08 | 5.289473684 |
| TCGA-78-7158-01A-11D-2036-08 | 7.184210526 |
| TCGA-44-2656-01A-41D-A27T-08 | 20.63157895 |
| TCGA-17-Z043-01A-01W-0746-08 | 6.236842105 |
| TCGA-91-6847-01A-11D-1945-08 | 2.052631579 |
| TCGA-55-8614-01A-11D-2393-08 | 6.447368421 |
| TCGA-64-1679-01A-21D-2063-08 | 13.71052632 |
| TCGA-NJ-A55R-01A-11D-A25L-08 | 7.473684211 |
| TCGA-55-6978-01A-11D-1945-08 | 0.526315789 |
| TCGA-78-7154-01A-11D-2036-08 | 7.763157895 |
| TCGA-17-Z036-01A-01W-0746-08 | 2.289473684 |

|                              |             |
|------------------------------|-------------|
| TCGA-17-Z048-01A-01W-0746-08 | 0.842105263 |
| TCGA-50-6593-01A-11D-1753-08 | 8.263157895 |
| TCGA-17-Z054-01A-01W-0747-08 | 0.210526316 |
| TCGA-50-8460-01A-11D-2323-08 | 0.736842105 |
| TCGA-80-5608-01A-31D-1945-08 | 5.184210526 |
| TCGA-50-6594-01A-11D-1753-08 | 16.63157895 |
| TCGA-55-6712-01A-11D-1855-08 | 2.973684211 |
| TCGA-55-7284-01B-11D-2238-08 | 1.131578947 |
| TCGA-17-Z000-01A-01W-0746-08 | 3.421052632 |
| TCGA-93-7348-01A-21D-2036-08 | 2.078947368 |
| TCGA-17-Z022-01A-01W-0746-08 | 38.15789474 |
| TCGA-55-7727-01A-11D-2167-08 | 6.236842105 |
| TCGA-69-8255-01A-11D-2284-08 | 8.657894737 |
| TCGA-MN-A4N5-01A-11D-A24P-08 | 13.36842105 |
| TCGA-17-Z060-01A-01W-0747-08 | 8.578947368 |
| TCGA-53-A4EZ-01A-12D-A24P-08 | 16.76315789 |
| TCGA-64-5778-01A-01D-1625-08 | 14.55263158 |
| TCGA-55-8514-01A-11D-2393-08 | 8.578947368 |
| TCGA-50-6591-01A-11D-1753-08 | 1.315789474 |
| TCGA-67-3774-01A-01D-1040-01 | 3.473684211 |
| TCGA-17-Z007-01A-01W-0746-08 | 1.894736842 |
| TCGA-55-7573-01A-11D-2036-08 | 1.421052632 |

|                              |             |
|------------------------------|-------------|
| TCGA-55-6971-01A-11D-1945-08 | 2.394736842 |
| TCGA-78-7166-01A-12D-2063-08 | 6.868421053 |
| TCGA-MP-A4SY-01A-21D-A24P-08 | 3.105263158 |
| TCGA-17-Z037-01A-01W-0746-08 | 3.736842105 |
| TCGA-49-6745-01A-11D-1855-08 | 3           |
| TCGA-97-A4M1-01A-11D-A24P-08 | 0.921052632 |
| TCGA-38-4631-01A-01D-1753-08 | 21.92105263 |
| TCGA-55-7910-01A-11D-2167-08 | 8.894736842 |
| TCGA-97-8174-01A-11D-2284-08 | 4.078947368 |
| TCGA-62-A472-01A-11D-A24D-08 | 1.657894737 |
| TCGA-55-6543-01A-11D-1753-08 | 0.578947368 |
| TCGA-86-7711-01A-11D-2063-08 | 6.157894737 |
| TCGA-17-Z026-01A-01W-0746-08 | 21.42105263 |
| TCGA-69-7763-01A-11D-2167-08 | 1.947368421 |
| TCGA-69-7979-01A-11D-2184-08 | 43.23684211 |
| TCGA-95-7948-01A-11D-2184-08 | 4           |
| TCGA-50-5049-01A-01D-1625-08 | 16.78947368 |
| TCGA-78-7156-01A-11D-2036-08 | 8.131578947 |
| TCGA-05-4390-01A-02D-1753-08 | 16.68421053 |
| TCGA-50-7109-01A-11D-2036-08 | 7           |
| TCGA-78-7160-01A-11D-2036-08 | 1.026315789 |
| TCGA-67-3773-01A-01D-1040-01 | 3.210526316 |



|                              |             |
|------------------------------|-------------|
| TCGA-62-8394-01A-11D-2323-08 | 2.342105263 |
| TCGA-62-A471-01A-12D-A24D-08 | 3.236842105 |
| TCGA-55-A494-01A-11D-A24P-08 | 7.473684211 |
| TCGA-44-7661-01A-11D-2063-08 | 6.105263158 |
| TCGA-55-8096-01A-11D-2238-08 | 3.131578947 |
| TCGA-99-8025-01A-11D-2238-08 | 14.02631579 |
| TCGA-44-2661-01A-01D-1105-08 | 1           |
| TCGA-44-5645-01A-51D-A27T-08 | 1.105263158 |
| TCGA-73-4658-01A-01D-1753-08 | 5.052631579 |
| TCGA-05-4417-01A-22D-1855-08 | 8.763157895 |
| TCGA-86-8671-01A-11D-2393-08 | 0.078947368 |
| TCGA-44-6144-01A-11D-1753-08 | 6.105263158 |
| TCGA-44-6776-01A-11D-1855-08 | 6.105263158 |
| TCGA-17-Z044-01A-01W-0746-08 | 3.894736842 |
| TCGA-78-7148-01A-11D-2036-08 | 6.105263158 |
| TCGA-MP-A4TJ-01A-51D-A25L-08 | 1.736842105 |
| TCGA-50-5944-01A-11D-1753-08 | 2.078947368 |
| TCGA-95-7043-01A-11D-1945-08 | 34.05263158 |
| TCGA-78-7147-01A-11D-2036-08 | 10.23684211 |
| TCGA-78-8655-01A-11D-2393-08 | 3.289473684 |
| TCGA-05-4403-01A-01D-1265-08 | 4.184210526 |
| TCGA-64-5781-01A-01D-1625-08 | 31.07894737 |

|                              |             |
|------------------------------|-------------|
| TCGA-93-A4JO-01A-21D-A24P-08 | 0.657894737 |
| TCGA-50-5066-01A-01D-1625-08 | 6.342105263 |
| TCGA-05-4433-01A-22D-1855-08 | 1.131578947 |
| TCGA-73-4662-01A-01D-1265-08 | 5.973684211 |
| TCGA-55-7815-01A-11D-2167-08 | 3.684210526 |
| TCGA-55-8510-01A-11D-2393-08 | 8.289473684 |
| TCGA-44-8117-01A-11D-2238-08 | 23.52631579 |
| TCGA-55-7576-01A-11D-2063-08 | 10.02631579 |
| TCGA-78-7539-01A-11D-2063-08 | 13.31578947 |
| TCGA-55-1592-01A-01D-0969-08 | 15.68421053 |
| TCGA-17-Z003-01A-01W-0746-08 | 6.263157895 |
| TCGA-50-6590-01A-12D-1855-08 | 22.44736842 |
| TCGA-97-8175-01A-11D-2284-08 | 0.763157895 |
| TCGA-17-Z015-01A-01W-0746-08 | 15.81578947 |
| TCGA-86-6562-01A-11D-1753-08 | 1.131578947 |
| TCGA-78-7536-01A-11D-2063-08 | 19.36842105 |
| TCGA-55-8089-01A-11D-2238-08 | 32.39473684 |
| TCGA-44-7667-01A-31D-2063-08 | 12.86842105 |
| TCGA-55-7283-01A-11D-2036-08 | 5.578947368 |
| TCGA-49-AARQ-01A-11D-A410-08 | 20.78947368 |
| TCGA-44-6775-01A-31D-A27T-08 | 1.368421053 |
| TCGA-44-8119-01A-11D-2238-08 | 18.5        |

|                              |             |
|------------------------------|-------------|
| TCGA-62-8395-01A-11D-2323-08 | 1.552631579 |
| TCGA-62-8402-01A-11D-2323-08 | 1.736842105 |
| TCGA-97-7554-01A-11D-2036-08 | 12.44736842 |
| TCGA-MP-A4T9-01A-11D-A24P-08 | 0.394736842 |
| TCGA-17-Z052-01A-01W-0747-08 | 1.421052632 |
| TCGA-17-Z001-01A-01W-0746-08 | 6.342105263 |
| TCGA-J2-A4AE-01A-21D-A24D-08 | 1.052631579 |
| TCGA-75-6207-01A-11D-1753-08 | 1.552631579 |
| TCGA-75-6203-01A-11D-1753-08 | 0.289473684 |
| TCGA-78-8640-01A-11D-2393-08 | 20.15789474 |
| TCGA-05-4422-01A-01D-1265-08 | 1.210526316 |
| TCGA-17-Z061-01A-01W-0747-08 | 5.710526316 |
| TCGA-05-4430-01A-02D-1265-08 | 5.894736842 |
| TCGA-49-4501-01A-01D-1265-08 | 1.184210526 |
| TCGA-38-4628-01A-01D-1265-08 | 3.210526316 |
| TCGA-17-Z004-01A-01W-0746-08 | 0.605263158 |
| TCGA-75-6206-01A-11D-1753-08 | 2.526315789 |
| TCGA-17-Z027-01A-01W-0746-08 | 2.736842105 |
| TCGA-55-7728-01A-11D-2184-08 | 2.789473684 |
| TCGA-44-6779-01A-11D-1855-08 | 2.947368421 |
| TCGA-44-8120-01A-11D-2238-08 | 18.94736842 |
| TCGA-35-4123-01A-01D-1105-08 | 8.657894737 |

|                              |             |
|------------------------------|-------------|
| TCGA-69-7978-01A-11D-2184-08 | 12.55263158 |
| TCGA-49-4488-01A-01D-1753-08 | 8.868421053 |
| TCGA-91-6835-01A-11D-1855-08 | 1.263157895 |
| TCGA-91-8496-01A-11D-2393-08 | 0.710526316 |
| TCGA-49-4514-01A-21D-1855-08 | 9.342105263 |
| TCGA-75-5147-01A-01D-1625-08 | 1           |
| TCGA-50-5072-01A-21D-1855-08 | 4.684210526 |
| TCGA-50-8457-01A-11D-2323-08 | 1.394736842 |
| TCGA-95-7567-01A-11D-2063-08 | 24.31578947 |
| TCGA-69-A59K-01A-11D-A25L-08 | 14.55263158 |
| TCGA-69-8253-01A-11D-2284-08 | 4.552631579 |
| TCGA-86-8668-01A-11D-2393-08 | 0.842105263 |
| TCGA-67-6215-01A-11D-1753-08 | 2.605263158 |
| TCGA-97-8177-01A-11D-2284-08 | 0.605263158 |
| TCGA-MP-A4TD-01A-32D-A25L-08 | 1.947368421 |
| TCGA-49-AARN-01A-21D-A410-08 | 13.63157895 |
| TCGA-86-A456-01A-11D-A24D-08 | 8.342105263 |
| TCGA-62-A46S-01A-11D-A24D-08 | 3.263157895 |
| TCGA-44-A47G-01A-21D-A24D-08 | 0.815789474 |
| TCGA-MP-A4TK-01A-11D-A24P-08 | 8.763157895 |
| TCGA-78-7542-01A-21D-2063-08 | 11.15789474 |
| TCGA-80-5611-01A-01D-1625-08 | 5.736842105 |

|                              |             |
|------------------------------|-------------|
| TCGA-91-6848-01A-11D-1945-08 | 17.13157895 |
| TCGA-38-4632-01A-01D-1753-08 | 13.71052632 |
| TCGA-55-1595-01A-01D-0969-08 | 9.473684211 |
| TCGA-49-6743-01A-11D-1855-08 | 20          |
| TCGA-86-8056-01A-11D-2238-08 | 7.105263158 |
| TCGA-17-Z053-01A-01W-0747-08 | 10.07894737 |
| TCGA-97-A4M6-01A-11D-A24P-08 | 0.815789474 |
| TCGA-55-7725-01A-11D-2167-08 | 4.157894737 |
| TCGA-86-8076-01A-31D-2238-08 | 1.315789474 |
| TCGA-69-7765-01A-11D-2167-08 | 15.39473684 |
| TCGA-MP-A4T6-01A-32D-A25L-08 | 1.947368421 |
| TCGA-55-7726-01A-11D-2167-08 | 3.026315789 |
| TCGA-17-Z059-01A-01W-0747-08 | 4.736842105 |
| TCGA-MP-A4SW-01A-21D-A24P-08 | 1.447368421 |
| TCGA-55-7724-01A-11D-2167-08 | 3.289473684 |
| TCGA-69-7761-01A-11D-2167-08 | 0.684210526 |
| TCGA-44-A47B-01A-11D-A24D-08 | 1.5         |
| TCGA-91-6849-01A-11D-1945-08 | 3.789473684 |
| TCGA-L9-A7SV-01A-11D-A397-08 | 48.42105263 |
| TCGA-64-1676-01A-01D-0969-08 | 18.21052632 |
| TCGA-97-7938-01A-11D-2167-08 | 11.55263158 |
| TCGA-97-8171-01A-11D-2284-08 | 1.578947368 |

|                              |             |
|------------------------------|-------------|
| TCGA-05-4424-01A-22D-1855-08 | 17.23684211 |
| TCGA-55-7914-01A-11D-2167-08 | 5.052631579 |
| TCGA-75-7025-01A-12D-1945-08 | 0.763157895 |
| TCGA-L9-A5IP-01A-21D-A397-08 | 9.105263158 |
| TCGA-49-4486-01A-01D-1265-08 | 3.631578947 |
| TCGA-75-7031-01A-11D-1945-08 | 6.394736842 |
| TCGA-44-2666-01A-41D-A27T-08 | 0.657894737 |
| TCGA-55-6968-01A-11D-1945-08 | 13.5        |
| TCGA-75-7027-01A-11D-1945-08 | 7.763157895 |
| TCGA-73-7499-01A-11D-2184-08 | 1.552631579 |
| TCGA-NJ-A4YG-01A-22D-A25L-08 | 3.210526316 |
| TCGA-95-7039-01A-11D-1945-08 | 35.92105263 |
| TCGA-55-7281-01A-11D-2036-08 | 13.23684211 |
| TCGA-50-5936-01A-11D-1625-08 | 3.131578947 |
| TCGA-97-A4M0-01A-11D-A24P-08 | 11.86842105 |
| TCGA-95-8494-01A-11D-2323-08 | 3           |
| TCGA-55-8511-01A-11D-2393-08 | 15.02631579 |
| TCGA-95-7562-01A-11D-2238-08 | 12.42105263 |
| TCGA-62-8398-01A-11D-2323-08 | 2.526315789 |
| TCGA-49-AARE-01A-11D-A410-08 | 42.86842105 |
| TCGA-55-8087-01A-11D-2238-08 | 0.763157895 |
| TCGA-44-7669-01A-21D-2063-08 | 13.15789474 |

|                              |             |
|------------------------------|-------------|
| TCGA-86-8281-01A-11D-2284-08 | 7.236842105 |
| TCGA-50-8459-01A-11D-2323-08 | 2.421052632 |
| TCGA-69-7974-01A-11D-2184-08 | 13.81578947 |
| TCGA-55-6987-01A-11D-1945-08 | 4           |
| TCGA-MN-A4N4-01A-12D-A24P-08 | 36.71052632 |
| TCGA-44-5643-01A-01D-1625-08 | 4.026315789 |
| TCGA-55-8301-01A-11D-2284-08 | 6.578947368 |
| TCGA-78-8662-01A-11D-2393-08 | 36.31578947 |
| TCGA-MP-A4TH-01A-31D-A25L-08 | 3.105263158 |
| TCGA-17-Z041-01A-01W-0746-08 | 3.026315789 |
| TCGA-73-4677-01A-01D-1265-08 | 7.710526316 |
| TCGA-49-6761-01A-31D-1945-08 | 5.026315789 |
| TCGA-44-7660-01A-11D-2063-08 | 9.868421053 |
| TCGA-55-8620-01A-11D-2393-08 | 15.23684211 |
| TCGA-99-7458-01A-11D-2036-08 | 12.89473684 |
| TCGA-05-4389-01A-01D-1265-08 | 5.947368421 |
| TCGA-35-5375-01A-01D-1625-08 | 12.65789474 |
| TCGA-44-6777-01A-11D-1855-08 | 8.710526316 |
| TCGA-50-5935-01A-11D-1753-08 | 1.105263158 |
| TCGA-44-A479-01A-31D-A24D-08 | 7           |
| TCGA-17-Z042-01A-01W-0746-08 | 13.84210526 |
| TCGA-50-5055-01A-01D-1625-08 | 0.131578947 |

|                              |             |
|------------------------------|-------------|
| TCGA-95-A4VP-01A-21D-A25L-08 | 3.342105263 |
| TCGA-97-8179-01A-11D-2284-08 | 5.394736842 |
| TCGA-91-6831-01A-11D-1855-08 | 8.184210526 |
| TCGA-95-8039-01A-11D-2238-08 | 2.736842105 |
| TCGA-44-4112-01A-31D-A27T-08 | 12.92105263 |
| TCGA-17-Z032-01A-01W-0746-08 | 2.973684211 |
| TCGA-55-6970-01A-11D-1945-08 | 5.157894737 |
| TCGA-53-7813-01A-11D-2167-08 | 4.263157895 |
| TCGA-55-A492-01A-11D-A24D-08 | 7.447368421 |
| TCGA-75-5146-01A-01D-1625-08 | 5.710526316 |
| TCGA-99-8028-01A-11D-2238-08 | 4.078947368 |
| TCGA-86-8280-01A-11D-2284-08 | 1           |
| TCGA-38-4627-01A-01D-1553-08 | 0.5         |
| TCGA-05-4244-01A-01D-1105-08 | 6.657894737 |
| TCGA-17-Z018-01A-01W-0746-08 | 7.473684211 |
| TCGA-44-3398-01A-01D-1105-08 | 3.026315789 |
| TCGA-55-6972-01A-11D-1945-08 | 7.868421053 |
| TCGA-55-A490-01A-11D-A24D-08 | 38.05263158 |
| TCGA-44-3396-01A-01D-1553-08 | 3.789473684 |
| TCGA-55-8085-01A-11D-2238-08 | 8.368421053 |
| TCGA-44-7662-01A-11D-2063-08 | 15.42105263 |
| TCGA-55-7994-01A-11D-2184-08 | 47.05263158 |



|                              |             |
|------------------------------|-------------|
| TCGA-05-4382-01A-01D-1931-08 | 38.65789474 |
| TCGA-64-1680-01A-02D-0969-08 | 1.184210526 |
| TCGA-MP-A4T7-01A-11D-A24P-08 | 3.5         |
| TCGA-86-8278-01A-11D-2284-08 | 1.789473684 |
| TCGA-71-8520-01A-11D-2393-08 | 2.552631579 |
| TCGA-L9-A743-01A-43D-A397-08 | 1.763157895 |
| TCGA-17-Z019-01A-01W-0746-08 | 0.105263158 |
| TCGA-55-8205-01A-11D-2238-08 | 12.18421053 |
| TCGA-73-4676-01A-01D-1753-08 | 2.815789474 |
| TCGA-05-5715-01A-01D-1625-08 | 3.605263158 |
| TCGA-50-6673-01A-11D-1945-08 | 1.5         |
| TCGA-17-Z047-01A-01W-0747-08 | 0.421052632 |
| TCGA-05-4427-01A-21D-1855-08 | 28.63157895 |
| TCGA-49-6767-01A-11D-1855-08 | 13.52631579 |
| TCGA-05-4418-01A-01D-1265-08 | 8.236842105 |
| TCGA-78-8660-01A-11D-2393-08 | 6.394736842 |
| TCGA-50-5942-01A-21D-1753-08 | 0.921052632 |
| TCGA-86-8359-01A-11D-2323-08 | 4.736842105 |
| TCGA-49-6742-01A-11D-1855-08 | 7.5         |
| TCGA-44-6146-01A-31D-A27T-08 | 0.815789474 |
| TCGA-97-A4M3-01A-11D-A24P-08 | 5.921052632 |
| TCGA-05-4420-01A-01D-1265-08 | 8.763157895 |

|                              |             |
|------------------------------|-------------|
| TCGA-55-7570-01A-11D-2036-08 | 11.63157895 |
| TCGA-69-7980-01A-11D-2184-08 | 23.07894737 |
| TCGA-50-5939-01A-11D-1625-08 | 2.105263158 |
| TCGA-83-5908-01A-21D-2284-08 | 5.973684211 |
| TCGA-55-8508-01A-11D-2393-08 | 5.184210526 |
| TCGA-44-7672-01A-11D-2063-08 | 3.342105263 |
| TCGA-50-5941-01A-11D-1753-08 | 7.815789474 |
| TCGA-75-6211-01A-11D-1753-08 | 10.52631579 |
| TCGA-17-Z011-01A-01W-0746-08 | 3.315789474 |
| TCGA-38-4629-01A-02D-1265-08 | 8.605263158 |
| TCGA-17-Z031-01A-01W-0746-08 | 73.57894737 |
| TCGA-62-A46V-01A-11D-A24D-08 | 1.447368421 |
| TCGA-44-6148-01A-11D-1753-08 | 0.131578947 |
| TCGA-44-6145-01A-11D-1753-08 | 8.421052632 |

---

**Table S2. Univariate analysis and multivariate analysis of the correlation of GNPAT1 expression with disease-specific survival among lung adenocarcinoma patients in TCGA-LUAD cohort.**

| Variable                                                    | Univariate Cox analysis |                     |        |                 | Multivariate Cox analysis* |                    |        |                |
|-------------------------------------------------------------|-------------------------|---------------------|--------|-----------------|----------------------------|--------------------|--------|----------------|
|                                                             | coef                    | HR (95% CI)         | z      | p-value         | coef                       | HR (95% CI)        | z      | p-value        |
| Age                                                         | -0.0104                 | 0.99 (0.972-1.01)   | -1.11  | 0.268           |                            |                    |        |                |
| Gender (male vs. female)                                    | -0.0445                 | 0.956 (0.658-1.39)  | -0.234 | 0.815           |                            |                    |        |                |
| Stage II (vs. stage I)                                      | 1.18                    | 3.25 (2.05-5.16)    | 5      | <b>5.71E-07</b> | 1.07                       | 2.91 (1.54-5.47)   | 3.3    | <b>0.00095</b> |
| Stage III (vs. stage I)                                     | 1.26                    | 3.52 (2.12-5.86)    | 4.85   | <b>1.24E-06</b> | 1.36                       | 3.89 (1.8-8.42)    | 3.46   | <b>0.00055</b> |
| Stage IV (vs. stage I)                                      | 1.59                    | 4.91 (2.48-9.69)    | 4.58   | <b>4.61E-06</b> | 0.108                      | 1.11 (0.38-3.27)   | 0.197  | 0.844          |
| Race (white vs. non-white)                                  | 0.0929                  | 1.1 (0.635-1.9)     | 0.333  | 0.739           |                            |                    |        |                |
| Ethnicity (Hispanic and Latino vs. non-Hispanic and Latino) | 0.667                   | 1.95 (0.612-6.2)    | 1.13   | 0.259           |                            |                    |        |                |
| Tobacco smoking history (ever vs. never)                    | 0.0133                  | 1.01 (0.585-1.75)   | 0.0474 | 0.962           |                            |                    |        |                |
| Number pack years smoked                                    | 0.00231                 | 1 (0.993-1.01)      | 0.482  | 0.63            |                            |                    |        |                |
| Radiation therapy (yes vs. no)                              | 0.792                   | 2.21 (1.39-3.51)    | 3.35   | <b>0.000794</b> | 0.0298                     | 1.03 (0.514-2.06)  | 0.0842 | 0.933          |
| Additional radiation therapy (yes vs. no)                   | -0.0354                 | 0.965 (0.594-1.57)  | -0.143 | 0.886           |                            |                    |        |                |
| Additional pharmaceutical therapy (yes vs. no)              | -0.627                  | 0.534 (0.328-0.869) | -2.52  | <b>0.0116</b>   | -0.815                     | 0.443 (0.265-0.74) | -3.11  | <b>0.00187</b> |

|                                                                |        |                    |        |                 |       |                  |      |               |
|----------------------------------------------------------------|--------|--------------------|--------|-----------------|-------|------------------|------|---------------|
| KRAS mutation (yes vs. no)                                     | 0.254  | 1.29 (0.408-4.07)  | 0.433  | 0.665           |       |                  |      |               |
| EGFR mutation (yes vs. no)                                     | 0.218  | 1.24 (0.693-2.23)  | 0.731  | 0.465           |       |                  |      |               |
| EML4-ALK translocation (yes vs. no)                            | 0.669  | 1.95 (0.967-3.94)  | 1.87   | 0.0621          |       |                  |      |               |
| Location in lung parenchyma (central lung vs. peripheral lung) | -0.188 | 0.828 (0.433-1.59) | -0.568 | 0.57            |       |                  |      |               |
| Tumor intermediate dimension                                   | 0.0649 | 1.07 (0.545-2.09)  | 0.189  | 0.85            |       |                  |      |               |
| GNPNAT1                                                        | 0.534  | 1.71 (1.32-2.2)    | 4.11   | <b>3.91E-05</b> | 0.498 | 1.65 (1.11-2.44) | 2.47 | <b>0.0135</b> |

---

\*Concordance = 0.703 (se = 0.034), Likelihood ratio test = 33.03 on 6 df, p = 1e-05, Wald test = 32.11 on 6 df, p = 2e-05, Score (logrank) test = 34.58 on 6 df, p = 5e-06.

**Table S3. Univariate analysis and multivariate analysis of the correlation of GNPAT1 expression with progression-free survival among lung adenocarcinoma patients in TCGA-LUAD cohort.**

| Variable                                                    | Univariate Cox analysis |                    |        |                 | Multivariate Cox analysis* |                   |      |                 |
|-------------------------------------------------------------|-------------------------|--------------------|--------|-----------------|----------------------------|-------------------|------|-----------------|
|                                                             | coef                    | HR (95% CI)        | z      | p-value         | coef                       | HR (95% CI)       | z    | p-value         |
| Age                                                         | -0.001                  | 0.999 (0.985-1.01) | -0.141 | 0.888           |                            |                   |      |                 |
| Gender (male vs. female)                                    | 0.07                    | 1.07 (0.815-1.41)  | 0.499  | 0.617           |                            |                   |      |                 |
| Stage II (vs. stage I)                                      | 0.798                   | 2.22 (1.61-3.07)   | 4.85   | <b>1.22E-06</b> | 1.2                        | 3.31 (1.92-5.72)  | 4.3  | <b>1.68E-05</b> |
| Stage III (vs. stage I)                                     | 0.709                   | 2.03 (1.38-2.99)   | 3.61   | <b>0.00031</b>  | 0.98                       | 2.66 (1.37-5.2)   | 2.87 | <b>0.00406</b>  |
| Stage IV (vs. stage I)                                      | 0.849                   | 2.34 (1.32-4.13)   | 2.93   | <b>0.0034</b>   | 0.914                      | 2.49 (1.09-5.71)  | 2.16 | <b>0.0306</b>   |
| Race (white vs. non-white)                                  | 0.0557                  | 1.06 (0.703-1.59)  | 0.268  | 0.789           |                            |                   |      |                 |
| Ethnicity (Hispanic and Latino vs. non-Hispanic and Latino) | 0.291                   | 1.34 (0.495-3.62)  | 0.574  | 0.566           |                            |                   |      |                 |
| Tobacco smoking history (ever vs. never)                    | -0.0557                 | 0.946 (0.637-1.4)  | -0.276 | 0.782           |                            |                   |      |                 |
| Number pack years smoked                                    | -0.0006                 | 0.999 (0.993-1.01) | -0.165 | 0.869           |                            |                   |      |                 |
| Radiation therapy (yes vs. no)                              | 0.707                   | 2.03 (1.42-2.89)   | 3.92   | <b>9.01E-05</b> | 0.343                      | 1.41 (0.758-2.62) | 1.08 | 0.278           |
| Additional radiation therapy (yes vs. no)                   | 0.16                    | 1.17 (0.825-1.67)  | 0.89   | 0.373           |                            |                   |      |                 |
| Additional pharmaceutical therapy (yes vs. no)              | 0.27                    | 1.31 (0.914-1.88)  | 1.47   | 0.141           |                            |                   |      |                 |

|                                                                |         |                    |        |                 |       |                   |      |                |  |
|----------------------------------------------------------------|---------|--------------------|--------|-----------------|-------|-------------------|------|----------------|--|
| KRAS mutation (yes vs. no)                                     | -0.275  | 0.759 (0.316-1.82) | -0.616 | 0.538           |       |                   |      |                |  |
| EGFR mutation (yes vs. no)                                     | 0.483   | 1.62 (1.06-2.49)   | 2.21   | <b>0.0271</b>   | 0.316 | 1.37 (0.843-2.23) | 1.27 | 0.204          |  |
| EML4-ALK translocation (yes vs. no)                            | 0.509   | 1.66 (0.965-2.87)  | 1.83   | 0.0672          |       |                   |      |                |  |
| Location in lung parenchyma (central lung vs. peripheral lung) | -0.0709 | 0.932 (0.584-1.49) | -0.298 | 0.766           |       |                   |      |                |  |
| Tumor intermediate dimension                                   | 0.328   | 1.39 (0.84-2.29)   | 1.28   | 0.201           |       |                   |      |                |  |
| GNPNAT1                                                        | 0.327   | 1.39 (1.15-1.68)   | 3.36   | <b>0.000777</b> | 0.543 | 1.72 (1.19-2.49)  | 2.9  | <b>0.00373</b> |  |

---

\*Concordance = 0.733 (se = 0.032), Likelihood ratio test = 44.44 on 6 df, p = 6e-08, Wald test = 41.44 on 6 df, p = 2e-07, Score (logrank) test = 46.24 on 6 df, p = 3e-08.

**Table S4. *GNPNAT1* co-expressed genes.**

| Query    | Correlation coefficient | P-value  | FDR (BH) |
|----------|-------------------------|----------|----------|
| A1BG     | -0.073329107            | 0.096453 | 0.137727 |
| A1CF     | 0.144260373             | 0.001027 | 0.002181 |
| A2BP1    | -0.084609426            | 0.055001 | 0.08336  |
| A2LD1    | 0.041511797             | 0.347131 | 0.421509 |
| A2ML1    | 0.03885401              | 0.378899 | 0.453661 |
| A2M      | -0.37658219             | 8.50E-19 | 1.87E-17 |
| A4GALT   | 0.032846964             | 0.456994 | 0.53107  |
| A4GNT    | -0.213617454            | 9.95E-07 | 3.50E-06 |
| AAA1     | 0.0789296               | 0.073512 | 0.108121 |
| AAAS     | 0.105652204             | 0.016461 | 0.027917 |
| AACSL    | -0.108419775            | 0.013827 | 0.023836 |
| AACS     | 0.254661778             | 4.57E-09 | 2.29E-08 |
| AADAACL2 | -0.119822936            | 0.006481 | 0.011914 |
| AADAACL3 | 0.075055202             | 0.088842 | 0.127984 |
| AADAACL4 | -0.081349728            | 0.065082 | 0.096964 |
| AADAC    | -0.180733406            | 3.70E-05 | 0.000101 |
| AADAT    | -0.219649637            | 4.80E-07 | 1.78E-06 |
| AAGAB    | 0.38305059              | 1.92E-19 | 4.65E-18 |
| AAK1     | -0.208271628            | 1.87E-06 | 6.28E-06 |
| AAMP     | 0.032396757             | 0.463189 | 0.537082 |
| AANAT    | -0.146240115            | 0.000873 | 0.001875 |
| AARS2    | -0.108945876            | 0.013371 | 0.023107 |
| AARSD1   | 0.075881328             | 0.085375 | 0.123559 |
| AARS     | 0.174286369             | 7.01E-05 | 0.000183 |
| AASDHPPT | 0.248920572             | 1.03E-08 | 4.93E-08 |
| AASDH    | -0.062306368            | 0.157982 | 0.213332 |
| AASS     | -0.297932077            | 5.12E-12 | 3.99E-11 |
| AATF     | 0.142709288             | 0.001165 | 0.002449 |
| AATK     | -0.244684125            | 1.86E-08 | 8.53E-08 |
| ABAT     | -0.308817125            | 7.66E-13 | 6.83E-12 |
| ABCA10   | -0.448152503            | 8.27E-27 | 5.90E-25 |
| ABCA11P  | 0.040385444             | 0.360382 | 0.43514  |
| ABCA12   | -0.011476907            | 0.794996 | 0.835808 |
| ABCA13   | -0.224060796            | 2.78E-07 | 1.07E-06 |
| ABCA17P  | -0.130976617            | 0.002902 | 0.005681 |
| ABCA1    | -0.104195758            | 0.018017 | 0.03031  |
| ABCA2    | -0.302770488            | 2.22E-12 | 1.84E-11 |
| ABCA3    | -0.353434414            | 1.34E-16 | 2.09E-15 |
| ABCA4    | -0.218258385            | 5.69E-07 | 2.08E-06 |
| ABCA5    | -0.378424609            | 5.58E-19 | 1.26E-17 |
| ABCA6    | -0.329636443            | 1.61E-14 | 1.85E-13 |
| ABCA7    | -0.311718544            | 4.56E-13 | 4.19E-12 |

|         |              |          |          |
|---------|--------------|----------|----------|
| ABCA8   | -0.400258463 | 3.09E-21 | 9.76E-20 |
| ABCA9   | -0.36722352  | 6.92E-18 | 1.33E-16 |
| ABCB10  | 0.167722497  | 0.000131 | 0.000328 |
| ABCB11  | -0.007996954 | 0.856335 | 0.886723 |
| ABCB1   | -0.173087057 | 7.87E-05 | 0.000203 |
| ABCB4   | -0.037307863 | 0.398174 | 0.472803 |
| ABCB5   | -0.088717469 | 0.044178 | 0.068373 |
| ABCB6   | 0.181744665  | 3.34E-05 | 9.18E-05 |
| ABCB7   | 0.150591667  | 0.000606 | 0.00134  |
| ABCB8   | -0.00013075  | 0.997638 | 0.998519 |
| ABCB9   | -0.084612258 | 0.054993 | 0.083354 |
| ABCC10  | -0.16202216  | 0.000222 | 0.000533 |
| ABCC11  | -0.021215948 | 0.630978 | 0.692776 |
| ABCC12  | -0.379898753 | 3.98E-19 | 9.20E-18 |
| ABCC13  | -0.189231403 | 1.54E-05 | 4.49E-05 |
| ABCC1   | 0.081987051  | 0.063    | 0.094205 |
| ABCC2   | 0.304713091  | 1.58E-12 | 1.34E-11 |
| ABCC3   | -0.259171719 | 2.38E-09 | 1.24E-08 |
| ABCC4   | -0.153508839 | 0.000472 | 0.001063 |
| ABCC5   | -0.172827928 | 8.07E-05 | 0.000208 |
| ABCC6P1 | -0.260251233 | 2.03E-09 | 1.07E-08 |
| ABCC6P2 | -0.298004333 | 5.06E-12 | 3.95E-11 |
| ABCC6   | -0.39529518  | 1.04E-20 | 3.02E-19 |
| ABCC8   | -0.119272003 | 0.006732 | 0.012347 |
| ABCC9   | -0.032726101 | 0.458653 | 0.532471 |
| ABCD1   | -0.004024324 | 0.927409 | 0.943218 |
| ABCD2   | -0.107896067 | 0.014295 | 0.024575 |
| ABCD3   | -0.103508185 | 0.018795 | 0.031489 |
| ABCD4   | -0.220360436 | 4.40E-07 | 1.64E-06 |
| ABCE1   | 0.48134611   | 3.17E-31 | 4.40E-29 |
| ABCF1   | 0.097091126  | 0.027581 | 0.044638 |
| ABCF2   | 0.361152836  | 2.60E-17 | 4.55E-16 |
| ABCF3   | 0.068786914  | 0.118978 | 0.165955 |
| ABCG1   | -0.124908731 | 0.004527 | 0.008563 |
| ABCG2   | -0.069646437 | 0.114426 | 0.160378 |
| ABCG4   | -0.004269237 | 0.923005 | 0.939827 |
| ABCG5   | 0.062658455  | 0.155641 | 0.210526 |
| ABCG8   | 0.145704787  | 0.000912 | 0.001953 |
| ABHD10  | 0.163861064  | 0.000188 | 0.000456 |
| ABHD11  | -0.012268452 | 0.781205 | 0.824083 |
| ABHD12B | -0.084803366 | 0.054444 | 0.082642 |
| ABHD12  | -0.031989852 | 0.468828 | 0.54252  |
| ABHD13  | 0.019490221  | 0.659017 | 0.718157 |
| ABHD14A | -0.202073589 | 3.79E-06 | 1.21E-05 |



|         |              |          |          |
|---------|--------------|----------|----------|
| ABHD14B | -0.198336895 | 5.76E-06 | 1.79E-05 |
| ABHD15  | -0.121820816 | 0.005637 | 0.010491 |
| ABHD1   | -0.09547749  | 0.030279 | 0.04857  |
| ABHD2   | -0.065203996 | 0.13949  | 0.191217 |
| ABHD3   | 0.148009754  | 0.000754 | 0.00164  |
| ABHD4   | 0.107039312  | 0.015091 | 0.025822 |
| ABHD5   | 0.091679791  | 0.037537 | 0.058939 |
| ABHD6   | -0.107105639 | 0.015028 | 0.025729 |
| ABHD8   | -0.106953084 | 0.015173 | 0.025935 |
| ABI1    | 0.184279002  | 2.58E-05 | 7.22E-05 |
| ABI2    | -0.161440492 | 0.000234 | 0.000559 |
| ABI3BP  | -0.394686023 | 1.21E-20 | 3.45E-19 |
| ABI3    | -0.230205147 | 1.27E-07 | 5.17E-07 |
| ABL1    | -0.016413706 | 0.710186 | 0.764292 |
| ABL2    | 0.096241409  | 0.028975 | 0.046664 |
| ABLIM1  | -0.07107349  | 0.107173 | 0.151197 |
| ABLIM2  | -0.134389596 | 0.002241 | 0.004478 |
| ABLIM3  | -0.020450801 | 0.643348 | 0.70396  |
| ABO     | -0.251539308 | 7.13E-09 | 3.48E-08 |
| ABP1    | -0.048954222 | 0.267467 | 0.337041 |
| ABRA    | -0.191644517 | 1.19E-05 | 3.53E-05 |
| ABR     | -0.247707242 | 1.22E-08 | 5.76E-08 |
| ABT1    | 0.172827146  | 8.07E-05 | 0.000208 |
| ABTB1   | -0.452004807 | 2.69E-27 | 2.06E-25 |
| ABTB2   | 0.024875737  | 0.573274 | 0.641301 |
| ACAA1   | -0.249882045 | 9.01E-09 | 4.34E-08 |
| ACAA2   | 0.003969981  | 0.928387 | 0.943828 |
| ACACA   | -0.011697302 | 0.79115  | 0.832465 |
| ACACB   | -0.393878286 | 1.47E-20 | 4.12E-19 |
| ACAD10  | -0.134000067 | 0.002309 | 0.004603 |
| ACAD11  | -0.240772434 | 3.16E-08 | 1.40E-07 |
| ACAD8   | -0.354692719 | 1.03E-16 | 1.63E-15 |
| ACAD9   | 0.025332297  | 0.566254 | 0.634967 |
| ACADL   | -0.324294912 | 4.47E-14 | 4.78E-13 |
| ACADM   | 0.074474306  | 0.091348 | 0.131197 |
| ACADSB  | -0.239768777 | 3.62E-08 | 1.59E-07 |
| ACADS   | -0.250112418 | 8.72E-09 | 4.21E-08 |
| ACADVL  | -0.175027895 | 6.52E-05 | 0.000171 |
| ACAN    | 0.128278959  | 0.003544 | 0.006827 |
| ACAP1   | -0.257927452 | 2.85E-09 | 1.47E-08 |
| ACAP2   | 0.012758171  | 0.772706 | 0.817274 |
| ACAP3   | -0.213424674 | 1.02E-06 | 3.57E-06 |
| ACAT1   | 0.074699201  | 0.090371 | 0.129934 |
| ACAT2   | 0.180910328  | 3.63E-05 | 9.93E-05 |

|        |              |          |          |
|--------|--------------|----------|----------|
| ACBD3  | 0.163576608  | 0.000193 | 0.000468 |
| ACBD4  | -0.322184116 | 6.65E-14 | 6.92E-13 |
| ACBD5  | 0.219527938  | 4.87E-07 | 1.80E-06 |
| ACBD6  | 0.177731791  | 4.99E-05 | 0.000133 |
| ACBD7  | 0.019358349  | 0.66118  | 0.720161 |
| ACCN1  | -0.090377873 | 0.040344 | 0.062965 |
| ACCN2  | 0.030795183  | 0.485602 | 0.559136 |
| ACCN3  | -0.203278805 | 3.31E-06 | 1.07E-05 |
| ACCN4  | -0.203745732 | 3.14E-06 | 1.02E-05 |
| ACCN5  | -0.027082409 | 0.539733 | 0.610606 |
| ACCSL  | -0.11578899  | 0.008535 | 0.015332 |
| ACCS   | -0.402578041 | 1.74E-21 | 5.75E-20 |
| ACD    | -0.089210789 | 0.043008 | 0.066706 |
| ACE2   | -0.169715311 | 0.000109 | 0.000275 |
| ACER1  | -0.18264772  | 3.05E-05 | 8.43E-05 |
| ACER2  | -0.138596633 | 0.001617 | 0.00331  |
| ACER3  | 0.06286921   | 0.154252 | 0.208874 |
| ACE    | -0.230370034 | 1.25E-07 | 5.07E-07 |
| ACHE   | -0.246148823 | 1.52E-08 | 7.06E-08 |
| ACIN1  | -0.141493655 | 0.001285 | 0.00268  |
| ACLY   | 0.308576765  | 8.00E-13 | 7.12E-12 |
| ACMSD  | 0.128125309  | 0.003585 | 0.006897 |
| ACN9   | 0.321247605  | 7.93E-14 | 8.14E-13 |
| ACO1   | 0.044295247  | 0.315731 | 0.388096 |
| ACO2   | -0.064670089 | 0.142767 | 0.195239 |
| ACOT11 | -0.040080359 | 0.364025 | 0.438691 |
| ACOT12 | 0.128346149  | 0.003527 | 0.006798 |
| ACOT13 | 0.17574442   | 6.08E-05 | 0.00016  |
| ACOT1  | -0.019207874 | 0.663652 | 0.722223 |
| ACOT2  | 0.053160269  | 0.228466 | 0.294182 |
| ACOT4  | 0.132613814  | 0.002566 | 0.005072 |
| ACOT6  | 0.158604845  | 0.000302 | 0.000705 |
| ACOT7  | 0.252171588  | 6.52E-09 | 3.20E-08 |
| ACOT8  | 0.010785541  | 0.807095 | 0.845726 |
| ACOT9  | 0.204250921  | 2.96E-06 | 9.62E-06 |
| ACOX1  | -0.076873121 | 0.081356 | 0.118352 |
| ACOX2  | -0.143456624 | 0.001096 | 0.002316 |
| ACOX3  | -0.170430914 | 0.000102 | 0.000258 |
| ACOXL  | -0.490071228 | 1.81E-32 | 3.12E-30 |
| ACP1   | 0.298194533  | 4.90E-12 | 3.82E-11 |
| ACP2   | -0.032264648 | 0.465016 | 0.538857 |
| ACP5   | -0.248342125 | 1.12E-08 | 5.30E-08 |
| ACP6   | -0.008303865 | 0.850884 | 0.882138 |
| ACPL2  | 0.077031228  | 0.08073  | 0.117603 |

|        |              |          |          |
|--------|--------------|----------|----------|
| ACPP   | -0.031801924 | 0.471446 | 0.545201 |
| ACPT   | 0.080708361  | 0.067235 | 0.099858 |
| ACRBP  | -0.116253505 | 0.008272 | 0.014914 |
| ACRC   | -0.122171587 | 0.0055   | 0.010257 |
| ACRV1  | 0.260834841  | 1.86E-09 | 9.90E-09 |
| ACR    | -0.229371733 | 1.42E-07 | 5.70E-07 |
| ACSBG1 | -0.272428632 | 3.24E-10 | 1.93E-09 |
| ACSBG2 | -0.117820136 | 0.007437 | 0.013529 |
| ACSF2  | -0.189215857 | 1.54E-05 | 4.49E-05 |
| ACSF3  | -0.172509499 | 8.32E-05 | 0.000214 |
| ACSL1  | -0.147488173 | 0.000787 | 0.001705 |
| ACSL3  | 0.223810216  | 2.87E-07 | 1.10E-06 |
| ACSL4  | 0.165937156  | 0.000155 | 0.000382 |
| ACSL5  | -0.204149322 | 3.00E-06 | 9.72E-06 |
| ACSL6  | -0.234725914 | 7.07E-08 | 2.98E-07 |
| ACSM1  | -0.387605024 | 6.58E-20 | 1.68E-18 |
| ACSM2A | -0.101526761 | 0.021202 | 0.035166 |
| ACSM2B | -0.047043923 | 0.286608 | 0.357576 |
| ACSM3  | -0.242326608 | 2.56E-08 | 1.15E-07 |
| ACSM4  | -0.001521893 | 0.972516 | 0.979425 |
| ACSM5  | -0.361582231 | 2.37E-17 | 4.16E-16 |
| ACSS1  | -0.488674517 | 2.88E-32 | 4.79E-30 |
| ACSS2  | -0.291618012 | 1.49E-11 | 1.09E-10 |
| ACSS3  | -0.095468355 | 0.030295 | 0.048591 |
| ACTA1  | -0.034565683 | 0.433775 | 0.508403 |
| ACTA2  | -0.03949585  | 0.371068 | 0.445915 |
| ACTBL2 | -0.044729597 | 0.311004 | 0.38304  |
| ACTB   | 0.078808126  | 0.073958 | 0.108717 |
| ACTC1  | -0.142939018 | 0.001143 | 0.002407 |
| ACTG1  | 0.236380616  | 5.69E-08 | 2.42E-07 |
| ACTG2  | -0.138232692 | 0.001664 | 0.0034   |
| ACTL6A | 0.367031619  | 7.22E-18 | 1.38E-16 |
| ACTL6B | 0.030618287  | 0.488113 | 0.561422 |
| ACTL7A | -0.057476383 | 0.19283  | 0.253838 |
| ACTL7B | -0.119062561 | 0.00683  | 0.012513 |
| ACTL8  | 0.268877242  | 5.59E-10 | 3.23E-09 |
| ACTL9  | 0.039846428  | 0.366834 | 0.441517 |
| ACTN1  | 0.158149846  | 0.000315 | 0.000732 |
| ACTN2  | -0.378004349 | 6.14E-19 | 1.38E-17 |
| ACTN3  | 0.029252637  | 0.50773  | 0.580312 |
| ACTN4  | -0.052034193 | 0.238489 | 0.305258 |
| ACTR10 | 0.248072044  | 1.16E-08 | 5.49E-08 |
| ACTR1A | 0.101906342  | 0.020721 | 0.034428 |
| ACTR1B | -0.165573731 | 0.00016  | 0.000395 |

|          |              |          |          |
|----------|--------------|----------|----------|
| ACTR2    | 0.227041899  | 1.91E-07 | 7.52E-07 |
| ACTR3B   | 0.220660675  | 4.24E-07 | 1.58E-06 |
| ACTR3C   | 0.031621467  | 0.473966 | 0.547702 |
| ACTR3    | 0.392775832  | 1.92E-20 | 5.30E-19 |
| ACTR5    | 0.062969168  | 0.153597 | 0.208099 |
| ACTR6    | 0.301313711  | 2.86E-12 | 2.32E-11 |
| ACTR8    | -0.01703178  | 0.699792 | 0.755343 |
| ACTRT1   | -0.005800261 | 0.89553  | 0.918224 |
| ACTRT2   | -0.005211115 | 0.906089 | 0.926627 |
| ACVR1B   | -0.099655356 | 0.023717 | 0.038886 |
| ACVR1C   | 0.025100115  | 0.569819 | 0.638034 |
| ACVR1    | -0.099871579 | 0.023414 | 0.038451 |
| ACVR2A   | -0.216819653 | 6.78E-07 | 2.44E-06 |
| ACVR2B   | -0.023260973 | 0.598427 | 0.663954 |
| ACVRL1   | -0.223437793 | 3.00E-07 | 1.15E-06 |
| ACY1     | 0.131822806  | 0.002723 | 0.005359 |
| ACY3     | 0.031888974  | 0.470232 | 0.543987 |
| ACYP1    | 0.123849578  | 0.004884 | 0.009193 |
| ACYP2    | -0.149131392 | 0.000686 | 0.001504 |
| ADAD1    | 0.045495146  | 0.302788 | 0.374466 |
| ADAD2    | -0.059966709 | 0.174217 | 0.232569 |
| ADAL     | -0.11176336  | 0.011145 | 0.019588 |
| ADAM10   | 0.185581889  | 2.25E-05 | 6.37E-05 |
| ADAM11   | -0.12315712  | 0.00513  | 0.009622 |
| ADAM12   | 0.244779621  | 1.83E-08 | 8.42E-08 |
| ADAM15   | -0.018971606 | 0.66754  | 0.725892 |
| ADAM17   | 0.232895751  | 8.99E-08 | 3.73E-07 |
| ADAM18   | 0.063110061  | 0.152677 | 0.206965 |
| ADAM19   | 0.05601238   | 0.20443  | 0.267156 |
| ADAM20   | -0.162484052 | 0.000213 | 0.000513 |
| ADAM21P1 | 0.08364655   | 0.057834 | 0.087172 |
| ADAM21   | 0.136764272  | 0.001866 | 0.00378  |
| ADAM22   | 0.053654126  | 0.224167 | 0.289298 |
| ADAM23   | -0.061923931 | 0.160554 | 0.216396 |
| ADAM28   | -0.161275645 | 0.000238 | 0.000567 |
| ADAM29   | -0.106730573 | 0.015387 | 0.026254 |
| ADAM2    | 0.142965497  | 0.001141 | 0.002403 |
| ADAM30   | -0.047541468 | 0.281536 | 0.352171 |
| ADAM32   | 0.152297943  | 0.000524 | 0.001171 |
| ADAM33   | -0.330974409 | 1.25E-14 | 1.45E-13 |
| ADAM3A   | 0.017344072  | 0.694561 | 0.750508 |
| ADAM5P   | 0.040462705  | 0.359463 | 0.434162 |
| ADAM6    | -0.070582711 | 0.109625 | 0.154331 |
| ADAM7    | 0.03443659   | 0.435495 | 0.51006  |

|          |              |          |          |
|----------|--------------|----------|----------|
| ADAM8    | -0.169243817 | 0.000114 | 0.000287 |
| ADAM9    | 0.164477802  | 0.000177 | 0.000434 |
| ADAMDEC1 | 0.061013729  | 0.166804 | 0.223764 |
| ADAMTS10 | -0.286056063 | 3.73E-11 | 2.55E-10 |
| ADAMTS12 | 0.174655037  | 6.76E-05 | 0.000177 |
| ADAMTS13 | -0.313386499 | 3.37E-13 | 3.17E-12 |
| ADAMTS14 | -0.09201664  | 0.036839 | 0.057943 |
| ADAMTS15 | -0.107856888 | 0.014331 | 0.024626 |
| ADAMTS16 | 0.003501981  | 0.93681  | 0.950313 |
| ADAMTS17 | -0.42153638  | 1.33E-23 | 6.01E-22 |
| ADAMTS18 | 0.022529521  | 0.609982 | 0.674317 |
| ADAMTS19 | -0.002080556 | 0.962433 | 0.97113  |
| ADAMTS1  | -0.203340045 | 3.29E-06 | 1.06E-05 |
| ADAMTS20 | 0.183915396  | 2.68E-05 | 7.48E-05 |
| ADAMTS2  | 0.031086811  | 0.481478 | 0.555293 |
| ADAMTS3  | -0.01560584  | 0.723853 | 0.775868 |
| ADAMTS4  | 0.240635416  | 3.22E-08 | 1.43E-07 |
| ADAMTS5  | 0.277299864  | 1.52E-10 | 9.50E-10 |
| ADAMTS6  | 0.159034462  | 0.000291 | 0.000681 |
| ADAMTS7  | 0.003600649  | 0.935034 | 0.948992 |
| ADAMTS8  | -0.487566735 | 4.15E-32 | 6.75E-30 |
| ADAMTS9  | -0.052554376 | 0.233821 | 0.300187 |
| ADAMTSL1 | -0.056062067 | 0.204028 | 0.266648 |
| ADAMTSL2 | -0.374912559 | 1.24E-18 | 2.66E-17 |
| ADAMTSL3 | -0.29680661  | 6.21E-12 | 4.79E-11 |
| ADAMTSL4 | -0.237406913 | 4.96E-08 | 2.13E-07 |
| ADAMTSL5 | -0.078075081 | 0.076693 | 0.112394 |
| ADAP1    | -0.039829156 | 0.367041 | 0.441661 |
| ADAP2    | -0.092966388 | 0.034929 | 0.055233 |
| ADARB1   | -0.293406421 | 1.10E-11 | 8.19E-11 |
| ADARB2   | -0.142367815 | 0.001197 | 0.002511 |
| ADAR     | 0.066958417  | 0.129131 | 0.17841  |
| ADAT1    | 0.048199977  | 0.274917 | 0.345243 |
| ADAT2    | -0.146690075 | 0.000841 | 0.001812 |
| ADAT3    | -0.051551416 | 0.242879 | 0.310202 |
| ADA      | 0.277652801  | 1.43E-10 | 9.03E-10 |
| ADCK1    | -0.055815005 | 0.206032 | 0.268968 |
| ADCK2    | -0.039709396 | 0.368485 | 0.443184 |
| ADCK4    | -0.168393    | 0.000123 | 0.000309 |
| ADCK5    | -0.053311612 | 0.227143 | 0.292606 |
| ADCY10   | -0.096388932 | 0.028728 | 0.046308 |
| ADCY1    | -0.1533667   | 0.000478 | 0.001076 |
| ADCY2    | -0.23471075  | 7.09E-08 | 2.98E-07 |
| ADCY3    | 0.039971617  | 0.365329 | 0.439997 |

|           |              |          |          |
|-----------|--------------|----------|----------|
| ADCY4     | -0.300678739 | 3.20E-12 | 2.57E-11 |
| ADCY5     | -0.157843373 | 0.000323 | 0.00075  |
| ADCY6     | -0.304315519 | 1.70E-12 | 1.43E-11 |
| ADCY7     | -0.137142764 | 0.001812 | 0.00368  |
| ADCY8     | -0.094008625 | 0.03293  | 0.052346 |
| ADCY9     | -0.436238807 | 2.44E-25 | 1.43E-23 |
| ADCYAP1R1 | -0.13500915  | 0.002137 | 0.004292 |
| ADCYAP1   | -0.185701343 | 2.23E-05 | 6.30E-05 |
| ADC       | -0.291823614 | 1.44E-11 | 1.05E-10 |
| ADD1      | -0.256334756 | 3.59E-09 | 1.82E-08 |
| ADD2      | -0.129692641 | 0.003193 | 0.006204 |
| ADD3      | -0.130444481 | 0.00302  | 0.005894 |
| ADH1A     | -0.366597437 | 7.94E-18 | 1.51E-16 |
| ADH1B     | -0.404450351 | 1.09E-21 | 3.69E-20 |
| ADH1C     | -0.185810872 | 2.20E-05 | 6.24E-05 |
| ADH4      | 0.083238187  | 0.059071 | 0.088869 |
| ADH5      | 0.110760948  | 0.011896 | 0.020762 |
| ADH6      | -0.060668633 | 0.169221 | 0.226727 |
| ADH7      | -0.103843449 | 0.018412 | 0.030907 |
| ADHFE1    | -0.411565723 | 1.79E-22 | 6.71E-21 |
| ADI1      | -0.024718331 | 0.575704 | 0.643362 |
| ADIG      | -0.040440022 | 0.359733 | 0.434435 |
| ADIPOQ    | 0.087309916  | 0.047665 | 0.073191 |
| ADIPOR1   | -0.022919105 | 0.603815 | 0.668831 |
| ADIPOR2   | 0.305458406  | 1.39E-12 | 1.19E-11 |
| ADK       | 0.054018446  | 0.221032 | 0.285787 |
| ADM2      | -0.011247451 | 0.799006 | 0.839186 |
| ADM       | 0.24038981   | 3.33E-08 | 1.47E-07 |
| ADNP2     | 0.132317658  | 0.002624 | 0.005178 |
| ADNP      | 0.141329677  | 0.001302 | 0.002713 |
| ADORA1    | -0.17124171  | 9.40E-05 | 0.00024  |
| ADORA2A   | -0.288083675 | 2.67E-11 | 1.87E-10 |
| ADORA2B   | -0.035982043 | 0.415163 | 0.489891 |
| ADORA3    | -0.142792712 | 0.001157 | 0.002433 |
| ADO       | 0.213896757  | 9.63E-07 | 3.39E-06 |
| ADPGK     | -0.027359821 | 0.535587 | 0.606705 |
| ADPRHL1   | -0.045907326 | 0.298424 | 0.369801 |
| ADPRHL2   | -0.111417913 | 0.011399 | 0.020001 |
| ADPRH     | -0.28176614  | 7.46E-11 | 4.89E-10 |
| ADRA1A    | -0.345908426 | 6.39E-16 | 9.08E-15 |
| ADRA1B    | -0.129145346 | 0.003325 | 0.006443 |
| ADRA1D    | -0.212690728 | 1.11E-06 | 3.87E-06 |
| ADRA2A    | -0.216109304 | 7.38E-07 | 2.65E-06 |
| ADRA2B    | -0.19757103  | 6.26E-06 | 1.93E-05 |

|         |              |          |          |
|---------|--------------|----------|----------|
| ADRA2C  | -0.161414358 | 0.000235 | 0.00056  |
| ADRB1   | -0.34734693  | 4.76E-16 | 6.92E-15 |
| ADRB2   | -0.411283464 | 1.93E-22 | 7.17E-21 |
| ADRB3   | -0.202101626 | 3.78E-06 | 1.21E-05 |
| ADRBK1  | -0.103564698 | 0.01873  | 0.031401 |
| ADRBK2  | -0.186022844 | 2.15E-05 | 6.12E-05 |
| ADRM1   | 0.133229393  | 0.002449 | 0.004859 |
| ADSL    | 0.317445349  | 1.60E-13 | 1.58E-12 |
| ADSSL1  | 0.136969237  | 0.001837 | 0.003726 |
| ADSS    | 0.128950197  | 0.003373 | 0.006524 |
| AEBP1   | -0.126281087 | 0.004101 | 0.007816 |
| AEBP2   | 0.141997376  | 0.001234 | 0.002582 |
| AEN     | 0.217390744  | 6.32E-07 | 2.29E-06 |
| AES     | -0.224676781 | 2.57E-07 | 9.93E-07 |
| AFAP1L1 | -0.050634919 | 0.251368 | 0.319493 |
| AFAP1L2 | -0.042240814 | 0.338722 | 0.412827 |
| AFAP1   | -0.014770092 | 0.738085 | 0.788121 |
| AFARP1  | 0.180304097  | 3.86E-05 | 0.000105 |
| AFF1    | -0.219399631 | 4.95E-07 | 1.83E-06 |
| AFF2    | -0.237084974 | 5.18E-08 | 2.22E-07 |
| AFF3    | -0.355351525 | 8.97E-17 | 1.43E-15 |
| AFF4    | -0.040339605 | 0.360928 | 0.435668 |
| AFG3L1  | -0.193719556 | 9.53E-06 | 2.86E-05 |
| AFG3L2  | 0.104794467  | 0.017363 | 0.029274 |
| AFMID   | 0.095347842  | 0.030506 | 0.048886 |
| AFM     | 0.111051611  | 0.011674 | 0.02042  |
| AFP     | 0.198835246  | 5.45E-06 | 1.70E-05 |
| AFTPH   | -0.051241441 | 0.245727 | 0.313379 |
| AG2     | -0.265416463 | 9.43E-10 | 5.27E-09 |
| AGAP11  | -0.376729785 | 8.22E-19 | 1.81E-17 |
| AGAP1   | 0.019030613  | 0.666568 | 0.725081 |
| AGAP2   | -0.20490144  | 2.75E-06 | 8.98E-06 |
| AGAP3   | -0.234929511 | 6.89E-08 | 2.90E-07 |
| AGAP4   | -0.244263829 | 1.97E-08 | 9.01E-08 |
| AGAP5   | -0.341667177 | 1.51E-15 | 2.04E-14 |
| AGAP6   | -0.216006935 | 7.47E-07 | 2.67E-06 |
| AGAP7   | -0.154011315 | 0.000452 | 0.001022 |
| AGAP8   | -0.229273334 | 1.44E-07 | 5.76E-07 |
| AGA     | 0.046840112  | 0.288703 | 0.359741 |
| AGBL1   | -0.15916307  | 0.000287 | 0.000674 |
| AGBL2   | -0.302343747 | 2.40E-12 | 1.96E-11 |
| AGBL3   | -0.172950134 | 7.98E-05 | 0.000206 |
| AGBL4   | -0.118955939 | 0.00688  | 0.012597 |
| AGBL5   | 0.070228048  | 0.111425 | 0.156567 |

|         |              |          |          |
|---------|--------------|----------|----------|
| AGER    | -0.357018304 | 6.30E-17 | 1.04E-15 |
| AGFG1   | 0.331389283  | 1.15E-14 | 1.34E-13 |
| AGFG2   | -0.215722765 | 7.73E-07 | 2.76E-06 |
| AGGF1   | -0.142881386 | 0.001149 | 0.002417 |
| AGK     | 0.013002379  | 0.768478 | 0.813836 |
| AGL     | -0.005427042 | 0.902217 | 0.923517 |
| AGMAT   | 0.426000087  | 4.04E-24 | 1.98E-22 |
| AGPAT1  | -0.036917684 | 0.40313  | 0.477808 |
| AGPAT2  | -0.100216879 | 0.022937 | 0.037758 |
| AGPAT3  | -0.262180261 | 1.53E-09 | 8.25E-09 |
| AGPAT4  | -0.147965109 | 0.000756 | 0.001645 |
| AGPAT5  | 0.277396844  | 1.49E-10 | 9.38E-10 |
| AGPAT6  | 0.037340418  | 0.397762 | 0.472511 |
| AGPAT9  | 0.102579205  | 0.019892 | 0.033164 |
| AGPHD1  | 0.006646875  | 0.880389 | 0.906232 |
| AGPS    | 0.33328423   | 7.96E-15 | 9.52E-14 |
| AGR2    | 0.034786717  | 0.430839 | 0.505554 |
| AGR3    | -0.236194826 | 5.83E-08 | 2.48E-07 |
| AGRN    | -0.138420575 | 0.001639 | 0.003353 |
| AGRP    | -0.226438525 | 2.06E-07 | 8.08E-07 |
| AGTPBP1 | -0.061681644 | 0.1622   | 0.218277 |
| AGTR1   | -0.157071138 | 0.000346 | 0.000799 |
| AGTR2   | -0.167907544 | 0.000129 | 0.000323 |
| AGTRAP  | 0.021312021  | 0.629432 | 0.691653 |
| AGT     | 0.063375452  | 0.150955 | 0.204992 |
| AGXT2L1 | 0.233807283  | 7.98E-08 | 3.33E-07 |
| AGXT2L2 | -0.435116481 | 3.34E-25 | 1.93E-23 |
| AGXT2   | -0.089249773 | 0.042917 | 0.066585 |
| AGXT    | 0.031682503  | 0.473113 | 0.546844 |
| AHCTF1  | 0.219105107  | 5.13E-07 | 1.89E-06 |
| AHCYL1  | -0.127875735 | 0.003651 | 0.007013 |
| AHCYL2  | -0.138990513 | 0.001567 | 0.003217 |
| AHCY    | 0.411207135  | 1.97E-22 | 7.30E-21 |
| AHDC1   | -0.320649158 | 8.87E-14 | 9.04E-13 |
| AHI1    | -0.141116591 | 0.001324 | 0.002754 |
| AHNAK2  | 0.151451899  | 0.000564 | 0.001252 |
| AHNAK   | -0.222319864 | 3.45E-07 | 1.31E-06 |
| AHRR    | -0.032672471 | 0.45939  | 0.533264 |
| AHR     | -0.179106884 | 4.35E-05 | 0.000117 |
| AHSA1   | 0.437852165  | 1.56E-25 | 9.46E-24 |
| AHSA2   | -0.321224387 | 7.96E-14 | 8.17E-13 |
| AHSG    | 0.201196233  | 4.19E-06 | 1.33E-05 |
| AHSP    | 0.002559582  | 0.953792 | 0.964407 |
| AICDA   | -0.008307997 | 0.850811 | 0.882138 |



|         |              |          |          |
|---------|--------------|----------|----------|
| AIDA    | -0.011824575 | 0.788931 | 0.830654 |
| AIF1L   | -0.119058817 | 0.006832 | 0.012515 |
| AIF1    | -0.149479899 | 0.000666 | 0.001464 |
| AIFM1   | 0.052783741  | 0.231784 | 0.297859 |
| AIFM2   | 0.166011776  | 0.000154 | 0.00038  |
| AIFM3   | -0.153888566 | 0.000457 | 0.001032 |
| AIG1    | 0.134317311  | 0.002254 | 0.004501 |
| AIM1L   | 0.081529243  | 0.06449  | 0.096146 |
| AIM1    | -0.154205006 | 0.000445 | 0.001007 |
| AIM2    | 0.078300465  | 0.075844 | 0.111312 |
| AIMP1   | 0.317516517  | 1.58E-13 | 1.56E-12 |
| AIMP2   | 0.455678426  | 9.08E-28 | 7.32E-26 |
| AIPL1   | 0.004156848  | 0.925026 | 0.941512 |
| AIP     | 0.021154908  | 0.631961 | 0.693703 |
| AIRE    | -0.156700539 | 0.000358 | 0.000823 |
| AJAP1   | -0.199261148 | 5.20E-06 | 1.63E-05 |
| AK1     | -0.336637055 | 4.12E-15 | 5.19E-14 |
| AK2     | 0.028710073  | 0.515637 | 0.58787  |
| AK3L1   | 0.30655824   | 1.14E-12 | 9.93E-12 |
| AK3     | 0.00599153   | 0.892106 | 0.91559  |
| AK5     | 0.041715785  | 0.344765 | 0.418966 |
| AK7     | -0.071027737 | 0.107399 | 0.151475 |
| AKAP10  | -0.033870525 | 0.443083 | 0.51728  |
| AKAP11  | -0.087897065 | 0.046183 | 0.071184 |
| AKAP12  | 0.197624511  | 6.23E-06 | 1.92E-05 |
| AKAP13  | -0.399207851 | 4.01E-21 | 1.25E-19 |
| AKAP14  | -0.192628028 | 1.07E-05 | 3.20E-05 |
| AKAP1   | -0.241220091 | 2.97E-08 | 1.32E-07 |
| AKAP2   | -0.009451045 | 0.830577 | 0.86513  |
| AKAP3   | -0.206977747 | 2.17E-06 | 7.20E-06 |
| AKAP4   | -0.022927355 | 0.603685 | 0.668724 |
| AKAP5   | 0.037309597  | 0.398152 | 0.472803 |
| AKAP6   | -0.156847706 | 0.000353 | 0.000813 |
| AKAP7   | -0.295136062 | 8.24E-12 | 6.26E-11 |
| AKAP8L  | -0.208333032 | 1.85E-06 | 6.24E-06 |
| AKAP8   | -0.17093905  | 9.68E-05 | 0.000247 |
| AKAP9   | -0.156482735 | 0.000365 | 0.000837 |
| AKD1    | -0.258680201 | 2.56E-09 | 1.33E-08 |
| AKIRIN1 | 0.181906252  | 3.28E-05 | 9.04E-05 |
| AKIRIN2 | 0.136916667  | 0.001844 | 0.00374  |
| AKNAD1  | 0.097204565  | 0.027399 | 0.044355 |
| AKNA    | -0.37643851  | 8.78E-19 | 1.93E-17 |
| AKR1A1  | -0.049361578 | 0.263502 | 0.332673 |
| AKR1B10 | 0.216549027  | 7.00E-07 | 2.52E-06 |

|          |              |          |          |
|----------|--------------|----------|----------|
| AKR1B15  | 0.26761973   | 6.77E-10 | 3.86E-09 |
| AKR1B1   | 0.084683117  | 0.054789 | 0.083083 |
| AKR1C1   | 0.155625909  | 0.000393 | 0.000897 |
| AKR1C2   | 0.211056574  | 1.35E-06 | 4.63E-06 |
| AKR1C3   | 0.156902874  | 0.000351 | 0.000809 |
| AKR1C4   | 0.251248954  | 7.43E-09 | 3.63E-08 |
| AKR1CL1  | 0.130162212  | 0.003084 | 0.006009 |
| AKR1D1   | 0.139322842  | 0.001527 | 0.003143 |
| AKR1E2   | 0.138429136  | 0.001638 | 0.003351 |
| AKR7A2   | -0.063559614 | 0.149769 | 0.203565 |
| AKR7A3   | 0.183537467  | 2.78E-05 | 7.75E-05 |
| AKR7L    | 0.063195236  | 0.152122 | 0.206284 |
| AKT1S1   | 0.089809244  | 0.041624 | 0.064791 |
| AKT1     | -0.104909957 | 0.017239 | 0.029087 |
| AKT2     | -0.010273438 | 0.816087 | 0.853314 |
| AKT3     | 0.027795768  | 0.529103 | 0.601057 |
| AKTIP    | -0.141470906 | 0.001287 | 0.002685 |
| ALAD     | -0.285725935 | 3.93E-11 | 2.69E-10 |
| ALAS1    | -0.081488113 | 0.064625 | 0.096326 |
| ALAS2    | -0.052864193 | 0.231072 | 0.297145 |
| ALB      | -0.101437795 | 0.021316 | 0.035341 |
| ALCAM    | -0.131991556 | 0.002689 | 0.0053   |
| ALDH16A1 | -0.197355619 | 6.41E-06 | 1.98E-05 |
| ALDH18A1 | 0.342297257  | 1.33E-15 | 1.81E-14 |
| ALDH1A1  | -0.170481505 | 0.000101 | 0.000257 |
| ALDH1A2  | -0.11378788  | 0.009755 | 0.017362 |
| ALDH1A3  | -0.018125022 | 0.681544 | 0.738639 |
| ALDH1B1  | 0.299829063  | 3.70E-12 | 2.94E-11 |
| ALDH1L1  | -0.090185682 | 0.040772 | 0.063584 |
| ALDH1L2  | 0.242424059  | 2.53E-08 | 1.14E-07 |
| ALDH2    | -0.286883324 | 3.25E-11 | 2.25E-10 |
| ALDH3A1  | -0.076884911 | 0.08131  | 0.118301 |
| ALDH3A2  | -0.102300597 | 0.020232 | 0.033671 |
| ALDH3B1  | -0.132686735 | 0.002551 | 0.005048 |
| ALDH3B2  | 0.10463174   | 0.017538 | 0.029558 |
| ALDH4A1  | -0.19791902  | 6.03E-06 | 1.87E-05 |
| ALDH5A1  | -0.231803264 | 1.04E-07 | 4.25E-07 |
| ALDH6A1  | -0.071374249 | 0.105691 | 0.149297 |
| ALDH7A1  | -0.022898713 | 0.604138 | 0.669114 |
| ALDH8A1  | -0.16364382  | 0.000192 | 0.000465 |
| ALDH9A1  | -0.103255269 | 0.019088 | 0.031943 |
| ALDOA    | 0.255981081  | 3.78E-09 | 1.91E-08 |
| ALDOB    | -0.217833618 | 5.99E-07 | 2.18E-06 |
| ALDOC    | -0.007812466 | 0.859614 | 0.88952  |

|          |              |          |          |
|----------|--------------|----------|----------|
| ALG10B   | 0.056678792  | 0.199088 | 0.260943 |
| ALG10    | 0.323322818  | 5.37E-14 | 5.65E-13 |
| ALG11    | 0.064150442  | 0.146011 | 0.199107 |
| ALG12    | -0.208258277 | 1.87E-06 | 6.28E-06 |
| ALG13    | -0.111940152 | 0.011017 | 0.01938  |
| ALG14    | 0.212923336  | 1.08E-06 | 3.77E-06 |
| ALG1L2   | 0.111990341  | 0.010981 | 0.01932  |
| ALG1L    | 0.106342237  | 0.015767 | 0.026843 |
| ALG1     | -0.122072451 | 0.005539 | 0.010325 |
| ALG2     | 0.072183644  | 0.101785 | 0.144446 |
| ALG3     | 0.24473049   | 1.84E-08 | 8.48E-08 |
| ALG5     | 0.068117334  | 0.122621 | 0.170576 |
| ALG6     | 0.157567818  | 0.000331 | 0.000766 |
| ALG8     | 0.336197654  | 4.49E-15 | 5.63E-14 |
| ALG9     | 0.070249346  | 0.111316 | 0.156436 |
| ALKBH1   | 0.185699346  | 2.23E-05 | 6.30E-05 |
| ALKBH2   | 0.332260286  | 9.72E-15 | 1.15E-13 |
| ALKBH3   | -0.104958342 | 0.017187 | 0.029017 |
| ALKBH4   | 0.072262203  | 0.101412 | 0.144026 |
| ALKBH5   | -0.046497146 | 0.292252 | 0.363506 |
| ALKBH6   | -0.121762992 | 0.00566  | 0.010529 |
| ALKBH7   | -0.078397621 | 0.07548  | 0.110811 |
| ALKBH8   | -0.043199953 | 0.327858 | 0.401177 |
| ALK      | -0.17952504  | 4.18E-05 | 0.000113 |
| ALLC     | 0.024216767  | 0.583478 | 0.650305 |
| ALMS1P   | -0.191708786 | 1.18E-05 | 3.51E-05 |
| ALMS1    | -0.13556379  | 0.002048 | 0.004125 |
| ALOX12B  | -0.008449793 | 0.848295 | 0.880177 |
| ALOX12P2 | 0.003286172  | 0.940697 | 0.953239 |
| ALOX12   | -0.097834762 | 0.026408 | 0.042911 |
| ALOX15B  | -0.30513792  | 1.47E-12 | 1.25E-11 |
| ALOX15   | -0.245197528 | 1.73E-08 | 7.98E-08 |
| ALOX5AP  | -0.169673554 | 0.000109 | 0.000276 |
| ALOX5    | -0.283735808 | 5.43E-11 | 3.63E-10 |
| ALOXE3   | 0.157652103  | 0.000329 | 0.000762 |
| ALPI     | 0.096813467  | 0.02803  | 0.045295 |
| ALPK1    | -0.283041767 | 6.08E-11 | 4.03E-10 |
| ALPK2    | 0.119038981  | 0.006841 | 0.01253  |
| ALPK3    | -0.015187075 | 0.730973 | 0.782073 |
| ALPL     | -0.333294744 | 7.94E-15 | 9.51E-14 |
| ALPPL2   | -0.051149746 | 0.246574 | 0.314299 |
| ALPP     | -0.079363659 | 0.071938 | 0.10611  |
| ALS2CL   | -0.2980374   | 5.03E-12 | 3.93E-11 |
| ALS2CR11 | -0.099821327 | 0.023484 | 0.038556 |

|          |              |          |          |
|----------|--------------|----------|----------|
| ALS2CR12 | -0.300435143 | 3.33E-12 | 2.67E-11 |
| ALS2CR4  | 0.094299875  | 0.032389 | 0.051577 |
| ALS2CR8  | -0.423901764 | 7.09E-24 | 3.31E-22 |
| ALS2     | -0.01319134  | 0.765211 | 0.811021 |
| ALX1     | 0.133024459  | 0.002487 | 0.004928 |
| ALX3     | -0.093678533 | 0.033552 | 0.053246 |
| ALX4     | -0.0654649   | 0.137911 | 0.189337 |
| AMAC1L2  | -0.109153648 | 0.013194 | 0.022832 |
| AMAC1L3  | -0.17633949  | 5.73E-05 | 0.000151 |
| AMAC1    | -0.07274032  | 0.099165 | 0.141226 |
| AMACR    | 0.040831677  | 0.355095 | 0.429643 |
| AMBN     | 0.095281679  | 0.030622 | 0.049052 |
| AMBP     | 0.035457679  | 0.421998 | 0.49657  |
| AMBRA1   | -0.230277652 | 1.26E-07 | 5.12E-07 |
| AMD1     | 0.240865041  | 3.12E-08 | 1.39E-07 |
| AMDHD1   | -0.014568201 | 0.741537 | 0.790835 |
| AMDHD2   | -0.175657738 | 6.13E-05 | 0.000161 |
| AMELX    | 0.066211069  | 0.133468 | 0.183882 |
| AMELY    | 0.113124321  | 0.010193 | 0.018067 |
| AMFR     | 0.116599165  | 0.008081 | 0.014607 |
| AMHR2    | -0.108925253 | 0.013389 | 0.02313  |
| AMH      | -0.111533836 | 0.011314 | 0.019864 |
| AMICA1   | -0.362940234 | 1.77E-17 | 3.16E-16 |
| AMIGO1   | -0.351433502 | 2.04E-16 | 3.10E-15 |
| AMIGO2   | -5.49E-05    | 0.999008 | 0.999408 |
| AMIGO3   | -0.138847815 | 0.001585 | 0.00325  |
| AMMECR1L | 0.047501505  | 0.281941 | 0.352612 |
| AMMECR1  | 0.187559379  | 1.83E-05 | 5.28E-05 |
| AMN1     | 0.131870173  | 0.002714 | 0.005345 |
| AMN      | -0.097841342 | 0.026398 | 0.042901 |
| AMOTL1   | -0.182149058 | 3.20E-05 | 8.83E-05 |
| AMOTL2   | -0.200447999 | 4.55E-06 | 1.44E-05 |
| AMOT     | -0.311802167 | 4.49E-13 | 4.14E-12 |
| AMPD1    | -0.207999078 | 1.93E-06 | 6.46E-06 |
| AMPD2    | -0.137353493 | 0.001782 | 0.003623 |
| AMPD3    | -0.212161574 | 1.18E-06 | 4.10E-06 |
| AMPH     | 0.017169153  | 0.697489 | 0.753224 |
| AMTN     | -0.107281869 | 0.014862 | 0.025477 |
| AMT      | -0.371749127 | 2.53E-18 | 5.15E-17 |
| AMY1A    | -0.355805234 | 8.15E-17 | 1.32E-15 |
| AMY2A    | -0.35582539  | 8.12E-17 | 1.32E-15 |
| AMY2B    | -0.481679015 | 2.85E-31 | 4.01E-29 |
| AMZ1     | -0.004421844 | 0.920262 | 0.93757  |
| AMZ2P1   | -0.203605885 | 3.19E-06 | 1.03E-05 |

|                 |              |          |          |
|-----------------|--------------|----------|----------|
| AMZ2            | 0.112548459  | 0.010587 | 0.018698 |
| ANAPC10         | 0.19221932   | 1.12E-05 | 3.33E-05 |
| ANAPC11         | 0.172274712  | 8.51E-05 | 0.000219 |
| ANAPC13         | 0.059434451  | 0.178078 | 0.237106 |
| ANAPC16         | -0.056279604 | 0.202276 | 0.264808 |
| ANAPC1          | 0.232717696  | 9.20E-08 | 3.81E-07 |
| ANAPC2          | -0.266705016 | 7.77E-10 | 4.39E-09 |
| ANAPC4          | -0.096343487 | 0.028804 | 0.046412 |
| ANAPC5          | 0.30355775   | 1.94E-12 | 1.62E-11 |
| ANAPC7          | 0.363973118  | 1.41E-17 | 2.57E-16 |
| ANGEL1          | -0.004031259 | 0.927284 | 0.943139 |
| ANGEL2          | -0.132150473 | 0.002657 | 0.005241 |
| ANGPT1          | -0.242975009 | 2.34E-08 | 1.06E-07 |
| ANGPT2          | 0.240663577  | 3.21E-08 | 1.42E-07 |
| ANGPT4          | -0.239673003 | 3.66E-08 | 1.61E-07 |
| ANGPTL1         | -0.153770297 | 0.000462 | 0.001042 |
| ANGPTL2         | 0.064053537  | 0.146623 | 0.199761 |
| ANGPTL3         | 0.100728023  | 0.022246 | 0.03673  |
| ANGPTL4         | 0.249176855  | 9.95E-09 | 4.77E-08 |
| ANGPTL5         | -0.35418913  | 1.15E-16 | 1.81E-15 |
| ANGPTL6         | -0.325011432 | 3.91E-14 | 4.23E-13 |
| ANGPTL7         | -0.301169224 | 2.94E-12 | 2.37E-11 |
| ANG             | -0.078161532 | 0.076366 | 0.11198  |
| ANK1            | -0.011148929 | 0.80073  | 0.840422 |
| ANK2            | -0.177154752 | 5.29E-05 | 0.00014  |
| ANK3            | -0.291789772 | 1.45E-11 | 1.06E-10 |
| ANKAR           | -0.259607349 | 2.23E-09 | 1.17E-08 |
| ANKDD1A         | -0.263866533 | 1.19E-09 | 6.53E-09 |
| ANKFN1          | -0.324702361 | 4.14E-14 | 4.46E-13 |
| ANKFY1          | -0.254996987 | 4.36E-09 | 2.19E-08 |
| ANKHD1-EIF4EBP3 | -0.286032402 | 3.74E-11 | 2.56E-10 |
| ANKHD1          | -0.281610941 | 7.65E-11 | 5.01E-10 |
| ANKH            | -0.109215839 | 0.013142 | 0.022759 |
| ANKIB1          | 0.279126066  | 1.14E-10 | 7.25E-10 |
| ANKK1           | -0.381349416 | 2.85E-19 | 6.76E-18 |
| ANKLE1          | 0.128321579  | 0.003533 | 0.006808 |
| ANKLE2          | 0.221142918  | 3.99E-07 | 1.50E-06 |
| ANKMY1          | -0.395282377 | 1.05E-20 | 3.02E-19 |
| ANKMY2          | -0.15111329  | 0.00058  | 0.001286 |
| ANKRA2          | -0.133367604 | 0.002423 | 0.004812 |
| ANKRD10         | -0.294485314 | 9.20E-12 | 6.93E-11 |
| ANKRD11         | -0.186022713 | 2.15E-05 | 6.12E-05 |
| ANKRD12         | -0.184075553 | 2.63E-05 | 7.37E-05 |
| ANKRD13A        | -0.225920448 | 2.20E-07 | 8.57E-07 |

|            |              |          |          |
|------------|--------------|----------|----------|
| ANKRD13B   | -0.009953276 | 0.821721 | 0.857858 |
| ANKRD13C   | -0.082911747 | 0.060076 | 0.090245 |
| ANKRD13D   | -0.136529427 | 0.0019   | 0.003844 |
| ANKRD16    | 0.032215369  | 0.465698 | 0.539491 |
| ANKRD17    | 0.025731688  | 0.560147 | 0.629497 |
| ANKRD19    | 0.06161419   | 0.162661 | 0.218852 |
| ANKRD1     | -0.092133971 | 0.036598 | 0.0576   |
| ANKRD20A3  | -0.186163965 | 2.12E-05 | 6.04E-05 |
| ANKRD20A4  | -0.147938268 | 0.000758 | 0.001648 |
| ANKRD20B   | -0.172954158 | 7.97E-05 | 0.000206 |
| ANKRD22    | -0.063064443 | 0.152974 | 0.20734  |
| ANKRD23    | -0.243438072 | 2.20E-08 | 9.99E-08 |
| ANKRD24    | -0.406345552 | 6.77E-22 | 2.36E-20 |
| ANKRD26P1  | 0.018157164  | 0.681011 | 0.73814  |
| ANKRD26    | -0.011924338 | 0.787192 | 0.829086 |
| ANKRD27    | 0.053807932  | 0.222839 | 0.287789 |
| ANKRD28    | -0.005631508 | 0.898553 | 0.920662 |
| ANKRD29    | -0.156314117 | 0.00037  | 0.000848 |
| ANKRD2     | 0.073080903  | 0.097589 | 0.1392   |
| ANKRD30A   | 0.0092173    | 0.834706 | 0.868646 |
| ANKRD30B   | 0.11238499   | 0.010701 | 0.018877 |
| ANKRD31    | -0.001060691 | 0.980843 | 0.985775 |
| ANKRD32    | 0.22883525   | 1.52E-07 | 6.07E-07 |
| ANKRD33    | 0.074637133  | 0.09064  | 0.130264 |
| ANKRD34A   | -0.150659049 | 0.000603 | 0.001334 |
| ANKRD34B   | -0.096067137 | 0.029268 | 0.047095 |
| ANKRD34C   | -0.163969971 | 0.000186 | 0.000452 |
| ANKRD35    | -0.130784395 | 0.002944 | 0.005758 |
| ANKRD36BP1 | -0.066277013 | 0.133081 | 0.183389 |
| ANKRD36B   | -0.094622527 | 0.031799 | 0.05074  |
| ANKRD36    | -0.21047292  | 1.44E-06 | 4.93E-06 |
| ANKRD37    | -0.014509404 | 0.742543 | 0.791732 |
| ANKRD39    | 0.112220148  | 0.010817 | 0.019068 |
| ANKRD40    | -0.047085504 | 0.286182 | 0.357199 |
| ANKRD42    | -0.185881706 | 2.18E-05 | 6.20E-05 |
| ANKRD43    | -0.033544124 | 0.447493 | 0.521757 |
| ANKRD44    | -0.417098012 | 4.28E-23 | 1.78E-21 |
| ANKRD45    | -0.150158957 | 0.000629 | 0.001386 |
| ANKRD46    | 0.076533294  | 0.082716 | 0.120119 |
| ANKRD49    | 0.026639822  | 0.546381 | 0.61687  |
| ANKRD50    | -0.164494141 | 0.000177 | 0.000433 |
| ANKRD52    | 0.087650576  | 0.0468   | 0.072029 |
| ANKRD53    | -0.11950174  | 0.006626 | 0.012166 |
| ANKRD54    | -0.058892173 | 0.182077 | 0.241465 |

|         |              |          |          |
|---------|--------------|----------|----------|
| ANKRD55 | -0.282988418 | 6.13E-11 | 4.06E-10 |
| ANKRD56 | -0.041222699 | 0.350502 | 0.425163 |
| ANKRD57 | 0.206909192  | 2.19E-06 | 7.25E-06 |
| ANKRD58 | -0.25778081  | 2.91E-09 | 1.50E-08 |
| ANKRD5  | 0.01407778   | 0.749943 | 0.798182 |
| ANKRD6  | -0.369021531 | 4.65E-18 | 9.14E-17 |
| ANKRD7  | 0.142176804  | 0.001216 | 0.002547 |
| ANKRD9  | 0.023339966  | 0.597185 | 0.662829 |
| ANKS1A  | -0.091023609 | 0.03893  | 0.060925 |
| ANKS1B  | -0.240033877 | 3.49E-08 | 1.54E-07 |
| ANKS3   | -0.329564425 | 1.64E-14 | 1.88E-13 |
| ANKS4B  | 0.092198123  | 0.036467 | 0.057421 |
| ANKS6   | -0.218371111 | 5.61E-07 | 2.06E-06 |
| ANKZF1  | -0.165326126 | 0.000164 | 0.000403 |
| ANLN    | 0.510763809  | 1.45E-35 | 4.68E-33 |
| ANO10   | 0.193544444  | 9.71E-06 | 2.91E-05 |
| ANO1    | -0.090617299 | 0.039815 | 0.062192 |
| ANO2    | -0.290202012 | 1.88E-11 | 1.35E-10 |
| ANO3    | 0.120090732  | 0.006361 | 0.011714 |
| ANO4    | -0.106635555 | 0.015479 | 0.026397 |
| ANO5    | -0.284857068 | 4.53E-11 | 3.07E-10 |
| ANO6    | 0.06355927   | 0.149771 | 0.203565 |
| ANO7    | 0.178014907  | 4.86E-05 | 0.00013  |
| ANO8    | -0.19989067  | 4.84E-06 | 1.52E-05 |
| ANO9    | -0.276981832 | 1.59E-10 | 9.95E-10 |
| ANP32A  | 0.146875476  | 0.000828 | 0.001787 |
| ANP32B  | 0.279452345  | 1.08E-10 | 6.90E-10 |
| ANP32C  | 0.134630062  | 0.0022   | 0.004405 |
| ANP32D  | 0.012641051  | 0.774736 | 0.819    |
| ANP32E  | 0.245592775  | 1.64E-08 | 7.58E-08 |
| ANPEP   | -0.118304742 | 0.007195 | 0.01312  |
| ANTXR1  | 0.017738245  | 0.68798  | 0.744644 |
| ANTXR2  | -0.003345673 | 0.939625 | 0.952395 |
| ANTXRL  | -0.230073696 | 1.30E-07 | 5.25E-07 |
| ANUBL1  | -0.089562938 | 0.042189 | 0.065558 |
| ANXA10  | 0.070701819  | 0.109026 | 0.153574 |
| ANXA11  | -0.169345078 | 0.000113 | 0.000284 |
| ANXA13  | 0.107285149  | 0.014859 | 0.025473 |
| ANXA1   | -0.062873306 | 0.154225 | 0.208852 |
| ANXA2P1 | 0.135265189  | 0.002096 | 0.004213 |
| ANXA2P2 | 0.085719916  | 0.051878 | 0.079077 |
| ANXA2P3 | 0.113133951  | 0.010186 | 0.018057 |
| ANXA2   | 0.078182626  | 0.076287 | 0.111897 |
| ANXA3   | -0.025175269 | 0.568664 | 0.637062 |

|         |              |          |          |
|---------|--------------|----------|----------|
| ANXA4   | -0.102208535 | 0.020345 | 0.033846 |
| ANXA5   | 0.056215784  | 0.202789 | 0.265393 |
| ANXA6   | -0.173569611 | 7.51E-05 | 0.000195 |
| ANXA7   | 0.26711287   | 7.31E-10 | 4.15E-09 |
| ANXA8L1 | 7.88E-06     | 0.999858 | 0.999963 |
| ANXA8L2 | -0.01663411  | 0.706473 | 0.761198 |
| ANXA8   | -0.032002112 | 0.468658 | 0.542373 |
| ANXA9   | -0.158920987 | 0.000294 | 0.000687 |
| AOAH    | -0.133257314 | 0.002443 | 0.00485  |
| AOC2    | 0.006634326  | 0.880613 | 0.906394 |
| AOC3    | -0.314949239 | 2.54E-13 | 2.43E-12 |
| AOX1    | -0.020684972 | 0.639551 | 0.70065  |
| AOX2P   | 0.209408509  | 1.64E-06 | 5.54E-06 |
| AP1AR   | 0.331655175  | 1.09E-14 | 1.28E-13 |
| AP1B1   | -0.196632629 | 6.94E-06 | 2.13E-05 |
| AP1G1   | 0.019843334  | 0.653239 | 0.712949 |
| AP1G2   | -0.214165639 | 9.32E-07 | 3.29E-06 |
| AP1M1   | -0.19282575  | 1.05E-05 | 3.13E-05 |
| AP1M2   | -0.107980347 | 0.014219 | 0.024459 |
| AP1S1   | 0.205647019  | 2.53E-06 | 8.31E-06 |
| AP1S2   | -0.16179321  | 0.000227 | 0.000543 |
| AP1S3   | 0.217272186  | 6.41E-07 | 2.32E-06 |
| AP2A1   | 0.080740332  | 0.067126 | 0.099712 |
| AP2A2   | -0.242917369 | 2.36E-08 | 1.07E-07 |
| AP2B1   | 0.039958099  | 0.365491 | 0.440166 |
| AP2M1   | 0.10823087   | 0.013995 | 0.024104 |
| AP2S1   | 0.248354424  | 1.12E-08 | 5.30E-08 |
| AP3B1   | -0.000689902 | 0.987539 | 0.99069  |
| AP3B2   | -0.205320762 | 2.62E-06 | 8.59E-06 |
| AP3D1   | -0.042084961 | 0.340508 | 0.414626 |
| AP3M1   | 0.119378617  | 0.006683 | 0.012266 |
| AP3M2   | -0.052651008 | 0.232961 | 0.299179 |
| AP3S1   | 0.229302819  | 1.43E-07 | 5.74E-07 |
| AP3S2   | -0.084492492 | 0.055339 | 0.083821 |
| AP4B1   | -0.26460019  | 1.07E-09 | 5.90E-09 |
| AP4E1   | -0.045306177 | 0.304802 | 0.376568 |
| AP4M1   | 0.141204528  | 0.001315 | 0.002737 |
| AP4S1   | 0.061862023  | 0.160974 | 0.216859 |
| APAF1   | 0.051683063  | 0.241676 | 0.308883 |
| APBA1   | -0.264266782 | 1.12E-09 | 6.18E-09 |
| APBA2   | -0.030381567 | 0.491484 | 0.5648   |
| APBA3   | -0.094101355 | 0.032757 | 0.052113 |
| APBB1IP | -0.221738539 | 3.71E-07 | 1.40E-06 |
| APBB1   | -0.361036805 | 2.67E-17 | 4.66E-16 |



|          |              |          |          |
|----------|--------------|----------|----------|
| APBB2    | -0.075220339 | 0.08814  | 0.127101 |
| APBB3    | -0.333417203 | 7.75E-15 | 9.31E-14 |
| APC2     | -0.019919099 | 0.652002 | 0.711754 |
| APCDD1L  | 0.315079898  | 2.48E-13 | 2.37E-12 |
| APCDD1   | -0.253303927 | 5.55E-09 | 2.75E-08 |
| APCS     | 0.134016801  | 0.002306 | 0.004598 |
| APC      | -0.200031752 | 4.77E-06 | 1.50E-05 |
| APEH     | 0.003379495  | 0.939016 | 0.951947 |
| APEX1    | 0.365250594  | 1.07E-17 | 1.99E-16 |
| APEX2    | 0.177241187  | 5.24E-05 | 0.000139 |
| APH1A    | 0.082253567  | 0.062145 | 0.093074 |
| APH1B    | -0.210732497 | 1.40E-06 | 4.80E-06 |
| API5     | 0.172644925  | 8.22E-05 | 0.000212 |
| APIP     | -0.049067993 | 0.266356 | 0.335852 |
| APITD1   | 0.077716089  | 0.078063 | 0.114108 |
| APLF     | -0.034613709 | 0.433136 | 0.507803 |
| APLNR    | -0.077134335 | 0.080324 | 0.117071 |
| APLN     | 0.034529233  | 0.43426  | 0.508852 |
| APLP1    | -0.15813512  | 0.000315 | 0.000732 |
| APLP2    | -0.3246122   | 4.21E-14 | 4.53E-13 |
| APOA1BP  | 0.224494689  | 2.63E-07 | 1.01E-06 |
| APOA1    | -0.064864987 | 0.141564 | 0.193754 |
| APOA2    | 0.177183015  | 5.27E-05 | 0.00014  |
| APOA4    | 0.069118185  | 0.117207 | 0.163782 |
| APOA5    | 0.03459413   | 0.433397 | 0.508048 |
| APOB48R  | -0.376003378 | 9.70E-19 | 2.11E-17 |
| APOBEC1  | 0.203922125  | 3.08E-06 | 9.96E-06 |
| APOBEC2  | -0.196394898 | 7.13E-06 | 2.18E-05 |
| APOBEC3A | 0.009822838  | 0.824019 | 0.859889 |
| APOBEC3B | 0.139713554  | 0.00148  | 0.003055 |
| APOBEC3C | -0.23055863  | 1.22E-07 | 4.95E-07 |
| APOBEC3D | -0.167344367 | 0.000136 | 0.000338 |
| APOBEC3F | -0.253572782 | 5.34E-09 | 2.66E-08 |
| APOBEC3G | -0.136681014 | 0.001878 | 0.003802 |
| APOBEC3H | -0.2455829   | 1.64E-08 | 7.59E-08 |
| APOBEC4  | -0.208744285 | 1.77E-06 | 5.96E-06 |
| APOB     | 0.032773344  | 0.458004 | 0.531872 |
| APOC1P1  | -0.025576617 | 0.562515 | 0.631837 |
| APOC1    | -0.098343077 | 0.025632 | 0.04176  |
| APOC2    | -0.147261643 | 0.000802 | 0.001735 |
| APOC3    | 0.141388297  | 0.001295 | 0.002701 |
| APOC4    | -0.169210493 | 0.000114 | 0.000287 |
| APOD     | -0.280957985 | 8.49E-11 | 5.53E-10 |
| APOE     | -0.120801985 | 0.006054 | 0.01119  |

|        |              |          |          |
|--------|--------------|----------|----------|
| APOF   | 0.241239398  | 2.97E-08 | 1.32E-07 |
| APOH   | -0.223248924 | 3.08E-07 | 1.17E-06 |
| APOL1  | 0.064273469  | 0.145238 | 0.198212 |
| APOL2  | 0.004093912  | 0.926158 | 0.94228  |
| APOL3  | -0.161388581 | 0.000235 | 0.000561 |
| APOL4  | -0.052863358 | 0.231079 | 0.297145 |
| APOL5  | 0.039881006  | 0.366418 | 0.441149 |
| APOL6  | 0.026581326  | 0.547263 | 0.617621 |
| APOLD1 | -0.042095925 | 0.340382 | 0.414498 |
| APOM   | -0.070792954 | 0.108569 | 0.152995 |
| APOOL  | 0.106184432  | 0.015923 | 0.027073 |
| APOO   | 0.230867812  | 1.17E-07 | 4.76E-07 |
| APPBP2 | -0.040998118 | 0.353135 | 0.42776  |
| APPL1  | 0.025207337  | 0.568172 | 0.636653 |
| APPL2  | 0.065730183  | 0.136318 | 0.187383 |
| APP    | -0.054518254 | 0.216783 | 0.281144 |
| APRT   | 0.136800425  | 0.001861 | 0.00377  |
| APT X  | 0.237677661  | 4.79E-08 | 2.06E-07 |
| AQP10  | -0.288218632 | 2.61E-11 | 1.83E-10 |
| AQP11  | 0.15628973   | 0.000371 | 0.00085  |
| AQP12A | 0.065585001  | 0.137188 | 0.188436 |
| AQP12B | 0.052470116  | 0.234573 | 0.301036 |
| AQP1   | -0.321345469 | 7.79E-14 | 8.02E-13 |
| AQP2   | -0.24159713  | 2.83E-08 | 1.26E-07 |
| AQP3   | -0.256850235 | 3.33E-09 | 1.70E-08 |
| AQP4   | -0.300729842 | 3.17E-12 | 2.55E-11 |
| AQP5   | -0.305444135 | 1.39E-12 | 1.19E-11 |
| AQP6   | -0.207715027 | 1.99E-06 | 6.65E-06 |
| AQP7P1 | -0.108834015 | 0.013467 | 0.023257 |
| AQP7P3 | -0.064209434 | 0.14564  | 0.198707 |
| AQP7   | -0.176327637 | 5.74E-05 | 0.000151 |
| AQP8   | -0.157128817 | 0.000344 | 0.000795 |
| AQP9   | 0.102874482  | 0.019537 | 0.032629 |
| AQPEP  | 0.127662808  | 0.003708 | 0.007118 |
| AQR    | 0.108090329  | 0.01412  | 0.024303 |
| ARAF   | -0.180217294 | 3.90E-05 | 0.000106 |
| ARAP1  | -0.365484422 | 1.01E-17 | 1.90E-16 |
| ARAP2  | -0.194040235 | 9.21E-06 | 2.77E-05 |
| ARAP3  | -0.331121686 | 1.21E-14 | 1.41E-13 |
| ARCN1  | 0.24530783   | 1.70E-08 | 7.87E-08 |
| ARC    | -0.26712026  | 7.30E-10 | 4.14E-09 |
| AREG   | 0.021720111  | 0.622883 | 0.685885 |
| ARF1   | 0.129657979  | 0.003201 | 0.006219 |
| ARF3   | 0.092720644  | 0.035415 | 0.055953 |

|           |              |          |          |
|-----------|--------------|----------|----------|
| ARF4      | 0.193454804  | 9.81E-06 | 2.94E-05 |
| ARF5      | 0.086088976  | 0.050873 | 0.077713 |
| ARF6      | 0.373873123  | 1.57E-18 | 3.32E-17 |
| ARFGAP1   | -0.001976    | 0.96432  | 0.972493 |
| ARFGAP2   | -0.324436277 | 4.36E-14 | 4.68E-13 |
| ARFGAP3   | 0.115935484  | 0.008451 | 0.015199 |
| ARFGEF1   | 0.092349556  | 0.036159 | 0.057008 |
| ARFGEF2   | 0.126080759  | 0.004161 | 0.00792  |
| ARFIP1    | 0.055771228  | 0.206388 | 0.269364 |
| ARFIP2    | 0.170792183  | 9.81E-05 | 0.00025  |
| ARFRP1    | -0.208188739 | 1.88E-06 | 6.33E-06 |
| ARG1      | 0.011202322  | 0.799796 | 0.83975  |
| ARG2      | 0.229626783  | 1.37E-07 | 5.53E-07 |
| ARGFXP2   | -0.227366646 | 1.83E-07 | 7.23E-07 |
| ARGFX     | 0.028350115  | 0.520917 | 0.593011 |
| ARGLU1    | -0.341824295 | 1.46E-15 | 1.97E-14 |
| ARHGAP10  | -0.08305812  | 0.059624 | 0.089613 |
| ARHGAP11A | 0.494980902  | 3.48E-33 | 6.89E-31 |
| ARHGAP11B | 0.334168676  | 6.69E-15 | 8.15E-14 |
| ARHGAP12  | 0.012602407  | 0.775406 | 0.819331 |
| ARHGAP15  | -0.225963424 | 2.19E-07 | 8.53E-07 |
| ARHGAP17  | -0.218175302 | 5.75E-07 | 2.10E-06 |
| ARHGAP18  | -0.156448111 | 0.000366 | 0.000839 |
| ARHGAP19  | -0.037949232 | 0.390108 | 0.464881 |
| ARHGAP1   | -0.239489618 | 3.76E-08 | 1.65E-07 |
| ARHGAP20  | -0.332976987 | 8.45E-15 | 1.01E-13 |
| ARHGAP21  | 0.123631521  | 0.00496  | 0.009325 |
| ARHGAP22  | -0.05624856  | 0.202525 | 0.265082 |
| ARHGAP23  | -0.28950559  | 2.11E-11 | 1.51E-10 |
| ARHGAP24  | -0.38430241  | 1.43E-19 | 3.55E-18 |
| ARHGAP25  | -0.293734095 | 1.04E-11 | 7.79E-11 |
| ARHGAP26  | 0.020518022  | 0.642257 | 0.703036 |
| ARHGAP27  | -0.323356122 | 5.34E-14 | 5.62E-13 |
| ARHGAP28  | -0.168371788 | 0.000123 | 0.00031  |
| ARHGAP29  | -0.090859025 | 0.039286 | 0.061421 |
| ARHGAP30  | -0.329001885 | 1.82E-14 | 2.07E-13 |
| ARHGAP31  | -0.4003649   | 3.01E-21 | 9.52E-20 |
| ARHGAP32  | -0.03186857  | 0.470517 | 0.544241 |
| ARHGAP33  | -0.222828316 | 3.24E-07 | 1.23E-06 |
| ARHGAP36  | 0.029001077  | 0.511388 | 0.583626 |
| ARHGAP39  | 0.08358096   | 0.058031 | 0.087423 |
| ARHGAP42  | -0.072441859 | 0.100563 | 0.142995 |
| ARHGAP4   | -0.138578812 | 0.001619 | 0.003314 |
| ARHGAP5   | 0.16466485   | 0.000174 | 0.000427 |

|           |              |          |          |
|-----------|--------------|----------|----------|
| ARHGAP6   | -0.316017266 | 2.09E-13 | 2.02E-12 |
| ARHGAP8   | -0.266744397 | 7.73E-10 | 4.37E-09 |
| ARHGAP9   | -0.256950416 | 3.29E-09 | 1.67E-08 |
| ARHGDIA   | -0.017226715 | 0.696525 | 0.752293 |
| ARHGDIB   | -0.323769597 | 4.94E-14 | 5.24E-13 |
| ARHGDIG   | 0.00982087   | 0.824053 | 0.859889 |
| ARHGEF10L | -0.279649662 | 1.05E-10 | 6.72E-10 |
| ARHGEF10  | -0.095408398 | 0.0304   | 0.048732 |
| ARHGEF11  | -0.211633805 | 1.26E-06 | 4.35E-06 |
| ARHGEF12  | -0.17835891  | 4.69E-05 | 0.000126 |
| ARHGEF15  | -0.329259253 | 1.74E-14 | 1.98E-13 |
| ARHGEF16  | -0.051951084 | 0.23924  | 0.306063 |
| ARHGEF17  | -0.424128971 | 6.67E-24 | 3.15E-22 |
| ARHGEF18  | -0.187136804 | 1.92E-05 | 5.50E-05 |
| ARHGEF19  | -0.3042115   | 1.73E-12 | 1.46E-11 |
| ARHGEF1   | -0.378884818 | 5.02E-19 | 1.14E-17 |
| ARHGEF2   | -0.377039862 | 7.66E-19 | 1.69E-17 |
| ARHGEF33  | -0.051577286 | 0.242642 | 0.309939 |
| ARHGEF35  | 0.041157002  | 0.351271 | 0.425812 |
| ARHGEF37  | -0.240466022 | 3.29E-08 | 1.46E-07 |
| ARHGEF38  | -0.122477275 | 0.005383 | 0.010057 |
| ARHGEF3   | -0.170477462 | 0.000101 | 0.000257 |
| ARHGEF4   | 0.183611401  | 2.76E-05 | 7.69E-05 |
| ARHGEF5   | -0.026629307 | 0.54654  | 0.616979 |
| ARHGEF6   | -0.308899258 | 7.55E-13 | 6.74E-12 |
| ARHGEF7   | -0.259982936 | 2.11E-09 | 1.11E-08 |
| ARHGEF9   | -0.337882697 | 3.22E-15 | 4.13E-14 |
| ARID1A    | -0.164795204 | 0.000172 | 0.000422 |
| ARID1B    | -0.165866858 | 0.000156 | 0.000385 |
| ARID2     | 0.003889118  | 0.929842 | 0.945114 |
| ARID3A    | 0.168984829  | 0.000117 | 0.000293 |
| ARID3B    | -0.047709529 | 0.279837 | 0.350396 |
| ARID3C    | 0.106438897  | 0.015671 | 0.026695 |
| ARID4A    | -0.24704835  | 1.34E-08 | 6.27E-08 |
| ARID4B    | -0.146076577 | 0.000885 | 0.001899 |
| ARID5A    | -0.196926728 | 6.72E-06 | 2.06E-05 |
| ARID5B    | -0.188200645 | 1.72E-05 | 4.96E-05 |
| ARIH1     | 0.041176479  | 0.351043 | 0.425613 |
| ARIH2     | -0.068454448 | 0.120776 | 0.168216 |
| ARL10     | -0.080304384 | 0.068621 | 0.101689 |
| ARL11     | -0.030019951 | 0.496657 | 0.56984  |
| ARL13A    | -0.128973943 | 0.003368 | 0.006516 |
| ARL13B    | -0.076631777 | 0.08232  | 0.119623 |
| ARL14     | 0.08524441   | 0.053196 | 0.080895 |

|         |              |          |          |
|---------|--------------|----------|----------|
| ARL15   | -0.173852169 | 7.31E-05 | 0.00019  |
| ARL16   | -0.024245848 | 0.583026 | 0.649946 |
| ARL17A  | -0.175237702 | 6.39E-05 | 0.000167 |
| ARL17B  | -0.237308406 | 5.03E-08 | 2.16E-07 |
| ARL1    | 0.264583998  | 1.07E-09 | 5.92E-09 |
| ARL2BP  | -0.048516824 | 0.271771 | 0.341731 |
| ARL2    | 0.102257468  | 0.020285 | 0.033751 |
| ARL3    | 0.018021766  | 0.68326  | 0.740097 |
| ARL4A   | 0.143253863  | 0.001115 | 0.002352 |
| ARL4C   | 0.08973138   | 0.041802 | 0.065042 |
| ARL4D   | 0.097080046  | 0.027598 | 0.044663 |
| ARL5A   | 0.265437537  | 9.40E-10 | 5.26E-09 |
| ARL5B   | 0.32750584   | 2.43E-14 | 2.70E-13 |
| ARL5C   | -0.132411011 | 0.002605 | 0.005143 |
| ARL6IP1 | 0.357069505  | 6.23E-17 | 1.03E-15 |
| ARL6IP4 | 0.016613637  | 0.706818 | 0.761405 |
| ARL6IP5 | -0.053137953 | 0.228662 | 0.294396 |
| ARL6IP6 | 0.298743272  | 4.46E-12 | 3.49E-11 |
| ARL6    | 0.034461359  | 0.435165 | 0.509732 |
| ARL8A   | -0.106194763 | 0.015913 | 0.02706  |
| ARL8B   | 0.002608586  | 0.952909 | 0.96366  |
| ARL9    | 0.186949482  | 1.96E-05 | 5.60E-05 |
| ARMC10  | 0.244286594  | 1.96E-08 | 8.98E-08 |
| ARMC1   | 0.437381667  | 1.78E-25 | 1.07E-23 |
| ARMC2   | -0.243492485 | 2.18E-08 | 9.92E-08 |
| ARMC3   | -0.075771038 | 0.085831 | 0.124112 |
| ARMC4   | -0.167516351 | 0.000134 | 0.000333 |
| ARMC5   | -0.314171886 | 2.92E-13 | 2.77E-12 |
| ARMC6   | 0.047804642  | 0.278878 | 0.349415 |
| ARMC7   | -0.172666467 | 8.20E-05 | 0.000211 |
| ARMC8   | 0.058865453  | 0.182276 | 0.241696 |
| ARMC9   | -0.313720482 | 3.17E-13 | 2.99E-12 |
| ARMCX1  | -0.181795665 | 3.32E-05 | 9.13E-05 |
| ARMCX2  | -0.126500731 | 0.004036 | 0.007701 |
| ARMCX3  | -0.118609206 | 0.007046 | 0.01287  |
| ARMCX5  | -0.04856815  | 0.271263 | 0.341222 |
| ARMCX6  | -0.090682005 | 0.039673 | 0.06199  |
| ARMS2   | -0.11938131  | 0.006681 | 0.012265 |
| ARNT2   | -0.250901902 | 7.80E-09 | 3.80E-08 |
| ARNTL2  | 0.379164739  | 4.71E-19 | 1.08E-17 |
| ARNTL   | -0.160515243 | 0.000255 | 0.000603 |
| ARNT    | -0.091249082 | 0.038447 | 0.060254 |
| ARPC1A  | 0.331059012  | 1.23E-14 | 1.43E-13 |
| ARPC1B  | 0.108665797  | 0.013612 | 0.023492 |

|          |              |          |          |
|----------|--------------|----------|----------|
| ARPC2    | 0.093262928  | 0.03435  | 0.054374 |
| ARPC3    | 0.349340646  | 3.15E-16 | 4.70E-15 |
| ARPC4    | 0.135981064  | 0.001983 | 0.004003 |
| ARPC5L   | 0.183798204  | 2.71E-05 | 7.56E-05 |
| ARPC5    | 0.185031897  | 2.39E-05 | 6.72E-05 |
| ARPM1    | 0.074751236  | 0.090147 | 0.129657 |
| ARPP19   | 0.222994719  | 3.17E-07 | 1.21E-06 |
| ARPP21   | -0.062478458 | 0.156834 | 0.21194  |
| ARR3     | -0.034758863 | 0.431209 | 0.50581  |
| ARRB1    | -0.167860261 | 0.00013  | 0.000324 |
| ARRB2    | -0.300232042 | 3.45E-12 | 2.76E-11 |
| ARRDC1   | -0.198208537 | 5.84E-06 | 1.81E-05 |
| ARRDC2   | -0.199046481 | 5.32E-06 | 1.66E-05 |
| ARRDC3   | -0.200994426 | 4.28E-06 | 1.36E-05 |
| ARRDC4   | -0.222352407 | 3.44E-07 | 1.30E-06 |
| ARRDC5   | -0.21713269  | 6.52E-07 | 2.36E-06 |
| ARSA     | -0.188538742 | 1.66E-05 | 4.80E-05 |
| ARSB     | -0.02779415  | 0.529127 | 0.601057 |
| ARSD     | -0.245469361 | 1.67E-08 | 7.70E-08 |
| ARSE     | -0.0632642   | 0.151675 | 0.205774 |
| ARSF     | -0.058915528 | 0.181903 | 0.241267 |
| ARSG     | -0.208316116 | 1.86E-06 | 6.25E-06 |
| ARSH     | 0.032506914  | 0.461669 | 0.535537 |
| ARSI     | 0.036020313  | 0.414666 | 0.489392 |
| ARSJ     | 0.010151457  | 0.818232 | 0.854931 |
| ARSK     | -0.037657215 | 0.393768 | 0.468657 |
| ART1     | -0.05776317  | 0.190615 | 0.251287 |
| ART3     | -0.009976134 | 0.821318 | 0.857527 |
| ART4     | -0.328135902 | 2.15E-14 | 2.41E-13 |
| ART5     | -0.090192584 | 0.040757 | 0.063565 |
| ARTN     | 0.221689429  | 3.73E-07 | 1.40E-06 |
| ARV1     | -0.172695994 | 8.18E-05 | 0.000211 |
| ARVCF    | -0.339305517 | 2.42E-15 | 3.17E-14 |
| ARX      | -0.143684045 | 0.001076 | 0.002277 |
| AR       | -0.217295274 | 6.40E-07 | 2.32E-06 |
| AS3MT    | -0.005049484 | 0.908989 | 0.928737 |
| ASAH1    | -0.207730023 | 1.99E-06 | 6.65E-06 |
| ASAH2B   | 0.125963051  | 0.004196 | 0.007981 |
| ASAH2    | 0.153934788  | 0.000455 | 0.001028 |
| ASAM     | 0.1544082    | 0.000437 | 0.000991 |
| ASAP1IT1 | 0.012523909  | 0.776768 | 0.820268 |
| ASAP1    | 0.160227372  | 0.000261 | 0.000618 |
| ASAP2    | -0.001263541 | 0.97718  | 0.983131 |
| ASAP3    | -0.384015454 | 1.53E-19 | 3.78E-18 |

|        |              |          |          |
|--------|--------------|----------|----------|
| ASB10  | 0.100249672  | 0.022892 | 0.037694 |
| ASB11  | -0.136803728 | 0.00186  | 0.00377  |
| ASB12  | -0.227368375 | 1.83E-07 | 7.23E-07 |
| ASB13  | 0.044990176  | 0.308191 | 0.380095 |
| ASB14  | -0.229452039 | 1.40E-07 | 5.64E-07 |
| ASB15  | -0.061731416 | 0.161861 | 0.217864 |
| ASB16  | -0.239610696 | 3.70E-08 | 1.62E-07 |
| ASB17  | 0.065705071  | 0.136469 | 0.187537 |
| ASB18  | 0.052507088  | 0.234243 | 0.30069  |
| ASB1   | 0.04097309   | 0.35343  | 0.428065 |
| ASB2   | -0.182733231 | 3.02E-05 | 8.36E-05 |
| ASB3   | -0.148474511 | 0.000725 | 0.001582 |
| ASB4   | -0.073874328 | 0.093995 | 0.134515 |
| ASB5   | -0.0327572   | 0.458226 | 0.532099 |
| ASB6   | -0.022728569 | 0.606828 | 0.671461 |
| ASB7   | 0.107737944  | 0.014439 | 0.024795 |
| ASB8   | 0.031041759  | 0.482114 | 0.555898 |
| ASB9   | 0.099670303  | 0.023696 | 0.038858 |
| ASCC1  | 0.236567653  | 5.55E-08 | 2.37E-07 |
| ASCC2  | -0.184981002 | 2.40E-05 | 6.75E-05 |
| ASCC3  | 0.115029782  | 0.008981 | 0.01607  |
| ASCL1  | 0.095231171  | 0.030711 | 0.049175 |
| ASCL2  | -0.058046273 | 0.188447 | 0.248888 |
| ASCL3  | -0.144866645 | 0.000977 | 0.002082 |
| ASCL4  | -0.29218107  | 1.35E-11 | 9.95E-11 |
| ASF1A  | 0.176984207  | 5.38E-05 | 0.000143 |
| ASF1B  | 0.395900136  | 9.00E-21 | 2.63E-19 |
| ASFMR1 | -0.113381042 | 0.010022 | 0.017794 |
| ASGR1  | -0.01878425  | 0.67063  | 0.728508 |
| ASGR2  | 0.033509606  | 0.447961 | 0.522242 |
| ASH1L  | -0.200508475 | 4.52E-06 | 1.43E-05 |
| ASH2L  | 0.042538121  | 0.33533  | 0.409236 |
| ASIP   | -0.034464833 | 0.435118 | 0.509708 |
| ASL    | -0.04358579  | 0.323552 | 0.396661 |
| ASMTL  | -0.271608417 | 3.68E-10 | 2.18E-09 |
| ASMT   | 0.085898695  | 0.051389 | 0.078421 |
| ASNA1  | 0.122974887  | 0.005197 | 0.009735 |
| ASNSD1 | 0.226373376  | 2.08E-07 | 8.14E-07 |
| ASNS   | 0.336819844  | 3.97E-15 | 5.02E-14 |
| ASPA   | -0.331688961 | 1.09E-14 | 1.27E-13 |
| ASPDH  | -0.206131213 | 2.39E-06 | 7.88E-06 |
| ASPG   | -0.014827014 | 0.737113 | 0.787209 |
| ASPHD1 | -0.114277511 | 0.009443 | 0.016844 |
| ASPHD2 | 0.035406673  | 0.422666 | 0.497219 |

|         |              |          |          |
|---------|--------------|----------|----------|
| ASPH    | 0.18291697   | 2.96E-05 | 8.22E-05 |
| ASPM    | 0.488815214  | 2.75E-32 | 4.65E-30 |
| ASPN    | -0.018471866 | 0.675793 | 0.73344  |
| ASPRV1  | -0.299673858 | 3.80E-12 | 3.01E-11 |
| ASPSCR1 | -0.044229801 | 0.316447 | 0.388833 |
| ASRGL1  | -0.143638232 | 0.00108  | 0.002284 |
| ASS1    | -0.10319867  | 0.019154 | 0.032038 |
| ASTE1   | -0.166118109 | 0.000152 | 0.000376 |
| ASTL    | -0.112019378 | 0.01096  | 0.019295 |
| ASTN1   | -0.144046494 | 0.001045 | 0.002215 |
| ASTN2   | -0.185773889 | 2.21E-05 | 6.26E-05 |
| ASXL1   | -0.04742016  | 0.282767 | 0.353534 |
| ASXL2   | 0.048713852  | 0.269827 | 0.339628 |
| ASXL3   | -0.083577966 | 0.05804  | 0.08743  |
| ASZ1    | -0.041936437 | 0.342217 | 0.416376 |
| ATAD1   | 0.249022961  | 1.02E-08 | 4.87E-08 |
| ATAD2B  | -0.115507318 | 0.008698 | 0.015601 |
| ATAD2   | 0.396020985  | 8.74E-21 | 2.56E-19 |
| ATAD3A  | 0.117695172  | 0.007501 | 0.013635 |
| ATAD3B  | 0.05517419   | 0.211295 | 0.274923 |
| ATAD3C  | -0.256570014 | 3.47E-09 | 1.77E-08 |
| ATAD5   | 0.237958571  | 4.61E-08 | 1.99E-07 |
| ATCAY   | -0.024025991 | 0.586448 | 0.652996 |
| ATE1    | 0.217911414  | 5.94E-07 | 2.17E-06 |
| ATF1    | 0.376132498  | 9.42E-19 | 2.06E-17 |
| ATF2    | 0.162675248  | 0.000209 | 0.000505 |
| ATF3    | -0.102271657 | 0.020267 | 0.033725 |
| ATF4    | 0.218525119  | 5.51E-07 | 2.02E-06 |
| ATF5    | 0.111805603  | 0.011115 | 0.019536 |
| ATF6B   | -0.046021467 | 0.297223 | 0.368512 |
| ATF6    | 0.077094129  | 0.080482 | 0.117276 |
| ATF7IP2 | -0.260103432 | 2.08E-09 | 1.09E-08 |
| ATF7IP  | -0.000988374 | 0.982149 | 0.98669  |
| ATF7    | -0.13753259  | 0.001758 | 0.003575 |
| ATG10   | 0.052149589  | 0.237448 | 0.30412  |
| ATG12   | 0.176201264  | 5.81E-05 | 0.000153 |
| ATG16L1 | 0.149777301  | 0.00065  | 0.001429 |
| ATG16L2 | -0.402394489 | 1.82E-21 | 6.01E-20 |
| ATG2A   | -0.194601805 | 8.66E-06 | 2.62E-05 |
| ATG2B   | -0.171469291 | 9.20E-05 | 0.000235 |
| ATG3    | 0.09808024   | 0.026031 | 0.042349 |
| ATG4A   | 0.036621268  | 0.406919 | 0.481671 |
| ATG4B   | -0.174777555 | 6.68E-05 | 0.000175 |
| ATG4C   | 0.163175422  | 0.0002   | 0.000484 |



|         |              |          |          |
|---------|--------------|----------|----------|
| ATG4D   | -0.025992723 | 0.556173 | 0.625593 |
| ATG5    | 0.213332592  | 1.03E-06 | 3.61E-06 |
| ATG7    | 0.00716122   | 0.87121  | 0.899657 |
| ATG9A   | -0.037124627 | 0.400497 | 0.475054 |
| ATG9B   | -0.058458286 | 0.185324 | 0.245157 |
| ATHL1   | -0.169782011 | 0.000108 | 0.000274 |
| ATIC    | 0.334674891  | 6.06E-15 | 7.45E-14 |
| ATL1    | 0.133064335  | 0.002479 | 0.004913 |
| ATL2    | 0.050734598  | 0.250435 | 0.318469 |
| ATL3    | 0.323058298  | 5.65E-14 | 5.92E-13 |
| ATMIN   | 0.22752519   | 1.79E-07 | 7.10E-07 |
| ATM     | -0.2352458   | 6.61E-08 | 2.79E-07 |
| ATN1    | -0.135057772 | 0.002129 | 0.004277 |
| ATOH1   | 0.045329918  | 0.304549 | 0.37634  |
| ATOH7   | 0.096410333  | 0.028693 | 0.046267 |
| ATOH8   | -0.244928489 | 1.79E-08 | 8.26E-08 |
| ATOX1   | 0.155224693  | 0.000407 | 0.000927 |
| ATP10A  | -0.197121398 | 6.58E-06 | 2.02E-05 |
| ATP10B  | -0.175998935 | 5.93E-05 | 0.000156 |
| ATP10D  | -0.148353047 | 0.000732 | 0.001597 |
| ATP11A  | -0.238651827 | 4.20E-08 | 1.83E-07 |
| ATP11B  | 0.03984096   | 0.366899 | 0.441569 |
| ATP11C  | 0.013273487  | 0.763792 | 0.809946 |
| ATP12A  | -0.072504293 | 0.100269 | 0.142636 |
| ATP13A1 | -0.120450234 | 0.006204 | 0.011447 |
| ATP13A2 | -0.142400932 | 0.001194 | 0.002505 |
| ATP13A3 | 0.264891588  | 1.02E-09 | 5.67E-09 |
| ATP13A4 | -0.498962662 | 8.98E-34 | 1.97E-31 |
| ATP13A5 | -0.24496394  | 1.79E-08 | 8.23E-08 |
| ATP1A1  | -0.294745246 | 8.81E-12 | 6.64E-11 |
| ATP1A2  | -0.433286264 | 5.54E-25 | 3.10E-23 |
| ATP1A3  | -0.124641652 | 0.004615 | 0.008722 |
| ATP1A4  | -0.284747093 | 4.61E-11 | 3.11E-10 |
| ATP1B1  | -0.03651166  | 0.408326 | 0.482993 |
| ATP1B2  | -0.354418246 | 1.09E-16 | 1.73E-15 |
| ATP1B3  | 0.242612011  | 2.46E-08 | 1.11E-07 |
| ATP1B4  | -0.0071579   | 0.87127  | 0.899671 |
| ATP2A1  | -0.003662335 | 0.933923 | 0.948299 |
| ATP2A2  | 0.28504691   | 4.39E-11 | 2.98E-10 |
| ATP2A3  | -0.059989074 | 0.174056 | 0.232401 |
| ATP2B1  | 0.257707188  | 2.95E-09 | 1.51E-08 |
| ATP2B2  | -0.189127001 | 1.56E-05 | 4.53E-05 |
| ATP2B3  | -0.224785933 | 2.54E-07 | 9.80E-07 |
| ATP2B4  | -0.111976931 | 0.010991 | 0.019335 |

|          |              |          |          |
|----------|--------------|----------|----------|
| ATP2C1   | 0.123892075  | 0.004869 | 0.009171 |
| ATP2C2   | -0.145500274 | 0.000928 | 0.001984 |
| ATP4A    | 0.010102175  | 0.819099 | 0.855658 |
| ATP4B    | -0.106563389 | 0.015549 | 0.026503 |
| ATP5A1   | 0.134395164  | 0.00224  | 0.004477 |
| ATP5B    | 0.435251571  | 3.22E-25 | 1.87E-23 |
| ATP5C1   | 0.347344052  | 4.76E-16 | 6.92E-15 |
| ATP5D    | 0.034303068  | 0.437278 | 0.511608 |
| ATP5EP2  | 0.14792439   | 0.000759 | 0.00165  |
| ATP5E    | 0.168954932  | 0.000117 | 0.000294 |
| ATP5F1   | 0.245800719  | 1.59E-08 | 7.38E-08 |
| ATP5G1   | 0.205630049  | 2.53E-06 | 8.32E-06 |
| ATP5G2   | 0.2103523    | 1.46E-06 | 5.00E-06 |
| ATP5G3   | 0.359517622  | 3.70E-17 | 6.33E-16 |
| ATP5H    | 0.196556287  | 7.00E-06 | 2.14E-05 |
| ATP5I    | 0.130700421  | 0.002962 | 0.005792 |
| ATP5J2   | 0.311917405  | 4.39E-13 | 4.05E-12 |
| ATP5J    | 0.16166509   | 0.00023  | 0.000549 |
| ATP5L2   | 0.058130233  | 0.187807 | 0.248191 |
| ATP5L    | 0.174284488  | 7.01E-05 | 0.000183 |
| ATP5O    | 0.089114565  | 0.043234 | 0.067005 |
| ATP5SL   | 0.096743916  | 0.028143 | 0.045468 |
| ATP5S    | 0.267341704  | 7.06E-10 | 4.02E-09 |
| ATP6AP1L | -0.232681898 | 9.24E-08 | 3.83E-07 |
| ATP6AP1  | -0.122485601 | 0.00538  | 0.010052 |
| ATP6AP2  | 0.110464221  | 0.012127 | 0.021131 |
| ATP6V0A1 | -0.450110508 | 4.68E-27 | 3.45E-25 |
| ATP6V0A2 | 0.174739969  | 6.70E-05 | 0.000175 |
| ATP6V0A4 | 0.053559711  | 0.224984 | 0.29024  |
| ATP6V0B  | 0.094638619  | 0.03177  | 0.050708 |
| ATP6V0C  | -0.106824691 | 0.015296 | 0.026116 |
| ATP6V0D1 | -0.217190435 | 6.48E-07 | 2.35E-06 |
| ATP6V0D2 | -0.206036641 | 2.42E-06 | 7.96E-06 |
| ATP6V0E1 | -0.109249564 | 0.013114 | 0.022717 |
| ATP6V0E2 | -0.121873144 | 0.005617 | 0.010458 |
| ATP6V1A  | 0.060897035  | 0.167619 | 0.224811 |
| ATP6V1B1 | -0.105851928 | 0.016258 | 0.027588 |
| ATP6V1B2 | -0.166138532 | 0.000152 | 0.000376 |
| ATP6V1C1 | 0.214201517  | 9.28E-07 | 3.28E-06 |
| ATP6V1C2 | 0.062529578  | 0.156494 | 0.211566 |
| ATP6V1D  | 0.207944392  | 1.94E-06 | 6.50E-06 |
| ATP6V1E1 | 0.047187131  | 0.285142 | 0.356058 |
| ATP6V1E2 | 0.104816049  | 0.017339 | 0.029237 |
| ATP6V1F  | 0.154104293  | 0.000449 | 0.001015 |

|          |              |          |          |
|----------|--------------|----------|----------|
| ATP6V1G1 | 0.140094101  | 0.001436 | 0.00297  |
| ATP6V1G2 | -0.11734323  | 0.007683 | 0.013936 |
| ATP6V1G3 | -0.118510631 | 0.007094 | 0.01295  |
| ATP6V1H  | 0.097236569  | 0.027348 | 0.044283 |
| ATP7A    | -0.182863599 | 2.98E-05 | 8.26E-05 |
| ATP7B    | 0.039268986  | 0.373824 | 0.448715 |
| ATP8A1   | -0.332218666 | 9.80E-15 | 1.16E-13 |
| ATP8A2   | -0.270557255 | 4.33E-10 | 2.54E-09 |
| ATP8B1   | 0.083544733  | 0.05814  | 0.087568 |
| ATP8B2   | -0.257341792 | 3.11E-09 | 1.59E-08 |
| ATP8B3   | 0.100898073  | 0.02202  | 0.036384 |
| ATP8B4   | -0.24416717  | 1.99E-08 | 9.12E-08 |
| ATP8B5P  | -0.13934683  | 0.001524 | 0.003138 |
| ATP9A    | -0.222468721 | 3.39E-07 | 1.28E-06 |
| ATP9B    | -0.207763135 | 1.98E-06 | 6.62E-06 |
| ATPAF1   | -0.103545605 | 0.018751 | 0.03143  |
| ATPAF2   | -0.037945591 | 0.390153 | 0.464881 |
| ATPBD4   | 0.240655607  | 3.21E-08 | 1.42E-07 |
| ATPIF1   | -0.158742539 | 0.000298 | 0.000697 |
| ATRIP    | -0.013214628 | 0.764809 | 0.810723 |
| ATRNL1   | -0.20731493  | 2.09E-06 | 6.94E-06 |
| ATRNL    | -0.091177482 | 0.0386   | 0.06046  |
| ATRX     | -0.162961015 | 0.000204 | 0.000493 |
| ATR      | 0.048043825  | 0.276477 | 0.34695  |
| ATXN10   | 0.006897268  | 0.875918 | 0.903072 |
| ATXN1L   | -0.233623051 | 8.17E-08 | 3.41E-07 |
| ATXN1    | -0.229483479 | 1.40E-07 | 5.62E-07 |
| ATXN2L   | -0.012615362 | 0.775182 | 0.819199 |
| ATXN2    | 0.016056119  | 0.716224 | 0.76901  |
| ATXN3L   | 0.006240947  | 0.887643 | 0.911915 |
| ATXN3    | -0.091988572 | 0.036897 | 0.058024 |
| ATXN7L1  | -0.192733394 | 1.06E-05 | 3.16E-05 |
| ATXN7L2  | -0.184277578 | 2.58E-05 | 7.22E-05 |
| ATXN7L3B | 0.218708811  | 5.39E-07 | 1.98E-06 |
| ATXN7L3  | 0.108841546  | 0.01346  | 0.023248 |
| ATXN7    | -0.30413486  | 1.75E-12 | 1.47E-11 |
| ATXN8OS  | 0.065408885  | 0.138249 | 0.189736 |
| AUH      | -0.029354295 | 0.506255 | 0.57898  |
| AUP1     | 0.141521735  | 0.001282 | 0.002675 |
| AURKAIP1 | 0.08864458   | 0.044353 | 0.068606 |
| AURKAPS1 | 0.215643645  | 7.81E-07 | 2.79E-06 |
| AURKA    | 0.546669009  | 1.81E-41 | 1.91E-38 |
| AURKB    | 0.505380581  | 9.72E-35 | 2.62E-32 |
| AURKC    | -0.093946785 | 0.033046 | 0.052497 |

|          |              |          |          |
|----------|--------------|----------|----------|
| AUTS2    | -0.379476711 | 4.38E-19 | 1.01E-17 |
| AVEN     | 0.355489677  | 8.72E-17 | 1.40E-15 |
| AVIL     | -0.222532249 | 3.36E-07 | 1.28E-06 |
| AVL9     | 0.317844061  | 1.49E-13 | 1.48E-12 |
| AVPI1    | 0.023243075  | 0.598708 | 0.664131 |
| AVPR1A   | 0.133627613  | 0.002376 | 0.004727 |
| AVPR1B   | -0.161488264 | 0.000233 | 0.000557 |
| AVPR2    | -0.200364106 | 4.59E-06 | 1.45E-05 |
| AVP      | 0.043535794  | 0.324108 | 0.397172 |
| AWAT1    | 0.103084626  | 0.019288 | 0.032246 |
| AWAT2    | -0.046451506 | 0.292727 | 0.363983 |
| AXIN1    | -0.082148433 | 0.062481 | 0.093493 |
| AXIN2    | -0.279216651 | 1.12E-10 | 7.15E-10 |
| AXL      | -0.140127877 | 0.001432 | 0.002962 |
| AZGP1    | -0.101698195 | 0.020984 | 0.034833 |
| AZI1     | -0.146859781 | 0.000829 | 0.001789 |
| AZI2     | 0.047406977  | 0.282901 | 0.353679 |
| AZIN1    | 0.345895743  | 6.41E-16 | 9.10E-15 |
| AZU1     | -0.332300316 | 9.64E-15 | 1.14E-13 |
| B2M      | -0.050739411 | 0.25039  | 0.31845  |
| B3GALNT1 | 0.13030038   | 0.003052 | 0.005952 |
| B3GALNT2 | 0.207439872  | 2.06E-06 | 6.85E-06 |
| B3GALT1  | 0.10816301   | 0.014055 | 0.0242   |
| B3GALT2  | -0.258704748 | 2.55E-09 | 1.32E-08 |
| B3GALT4  | -0.154997864 | 0.000415 | 0.000944 |
| B3GALT5  | 0.032543312  | 0.461167 | 0.535017 |
| B3GALT6  | -0.036564304 | 0.40765  | 0.482422 |
| B3GALTL  | -0.093101415 | 0.034664 | 0.054841 |
| B3GAT1   | -0.370615384 | 3.26E-18 | 6.53E-17 |
| B3GAT2   | -0.196660943 | 6.92E-06 | 2.12E-05 |
| B3GAT3   | -0.02160448  | 0.624736 | 0.687471 |
| B3GNT1   | -0.273615039 | 2.70E-10 | 1.63E-09 |
| B3GNT2   | 0.032041747  | 0.468107 | 0.54181  |
| B3GNT3   | 0.161535945  | 0.000232 | 0.000555 |
| B3GNT4   | 0.23218979   | 9.85E-08 | 4.06E-07 |
| B3GNT5   | 0.340348055  | 1.97E-15 | 2.61E-14 |
| B3GNT6   | 0.051251675  | 0.245633 | 0.313279 |
| B3GNT7   | -0.289331228 | 2.18E-11 | 1.54E-10 |
| B3GNT8   | -0.415995224 | 5.71E-23 | 2.33E-21 |
| B3GNT9   | -0.323786483 | 4.92E-14 | 5.23E-13 |
| B3GNTL1  | -0.057638346 | 0.191576 | 0.252421 |
| B4GALNT1 | 0.139325505  | 0.001527 | 0.003142 |
| B4GALNT2 | 0.192796466  | 1.05E-05 | 3.14E-05 |
| B4GALNT3 | -0.186273037 | 2.10E-05 | 5.97E-05 |

|          |              |          |          |
|----------|--------------|----------|----------|
| B4GALNT4 | 0.049241853  | 0.264663 | 0.33397  |
| B4GALT1  | 0.356321773  | 7.31E-17 | 1.19E-15 |
| B4GALT2  | 0.201767118  | 3.93E-06 | 1.25E-05 |
| B4GALT3  | 0.180316042  | 3.86E-05 | 0.000105 |
| B4GALT4  | 0.145327651  | 0.000941 | 0.00201  |
| B4GALT5  | 0.121711451  | 0.005681 | 0.010563 |
| B4GALT6  | 0.171488983  | 9.18E-05 | 0.000235 |
| B4GALT7  | -0.101178051 | 0.021652 | 0.035845 |
| B9D1     | -0.012070173 | 0.784653 | 0.827031 |
| B9D2     | -0.191863509 | 1.16E-05 | 3.45E-05 |
| BAALC    | 0.023937214  | 0.587833 | 0.654275 |
| BAAT     | -0.195281103 | 8.05E-06 | 2.44E-05 |
| BACE1    | -0.200354197 | 4.60E-06 | 1.45E-05 |
| BACE2    | 0.055551807  | 0.208182 | 0.271438 |
| BACH1    | 0.131708091  | 0.002747 | 0.005403 |
| BACH2    | -0.095341395 | 0.030517 | 0.0489   |
| BAD      | -0.125986909 | 0.004189 | 0.007969 |
| BAG1     | 0.052794727  | 0.231686 | 0.297791 |
| BAG2     | 0.406433693  | 6.62E-22 | 2.31E-20 |
| BAG3     | 0.100533243  | 0.022507 | 0.037106 |
| BAG4     | 0.184102034  | 2.63E-05 | 7.35E-05 |
| BAG5     | 0.151314767  | 0.00057  | 0.001266 |
| BAGE2    | 0.040817607  | 0.355261 | 0.429736 |
| BAGE     | 0.14483835   | 0.00098  | 0.002086 |
| BAHCC1   | -0.289653679 | 2.06E-11 | 1.47E-10 |
| BAHD1    | -0.192346574 | 1.10E-05 | 3.29E-05 |
| BAI1     | -0.163264031 | 0.000198 | 0.00048  |
| BAI2     | -0.086260082 | 0.050413 | 0.077114 |
| BAI3     | -0.289643738 | 2.07E-11 | 1.47E-10 |
| BAIAP2L1 | 0.100702134  | 0.02228  | 0.036771 |
| BAIAP2L2 | 0.101903749  | 0.020724 | 0.034431 |
| BAIAP2   | -0.29475949  | 8.79E-12 | 6.63E-11 |
| BAIAP3   | -0.192842242 | 1.05E-05 | 3.13E-05 |
| BAK1     | 0.103462632  | 0.018847 | 0.031567 |
| BAMBI    | -0.089356933 | 0.042666 | 0.066223 |
| BANF1    | 0.312138671  | 4.22E-13 | 3.91E-12 |
| BANF2    | 0.159735465  | 0.000273 | 0.000643 |
| BANK1    | -0.294941665 | 8.52E-12 | 6.45E-11 |
| BANP     | 0.097420397  | 0.027056 | 0.043864 |
| BAP1     | -0.222592817 | 3.34E-07 | 1.27E-06 |
| BARD1    | 0.152529113  | 0.000514 | 0.00115  |
| BARHL1   | -0.011437812 | 0.795679 | 0.836383 |
| BARHL2   | -0.02143315  | 0.627485 | 0.690078 |
| BARX1    | 0.163765106  | 0.000189 | 0.00046  |

|         |              |          |          |
|---------|--------------|----------|----------|
| BARX2   | 0.044908097  | 0.309076 | 0.38097  |
| BASE    | 0.020451861  | 0.643331 | 0.70396  |
| BASP1   | 0.262213581  | 1.52E-09 | 8.21E-09 |
| BAT1    | -0.088424263 | 0.044886 | 0.069382 |
| BAT2L1  | -0.109220716 | 0.013138 | 0.022755 |
| BAT2L2  | 0.02113018   | 0.63236  | 0.694026 |
| BAT2    | 0.020554262  | 0.641669 | 0.702547 |
| BAT3    | -0.03812102  | 0.387964 | 0.462769 |
| BAT4    | 0.013829271  | 0.754213 | 0.801703 |
| BAT5    | -0.087483552 | 0.047222 | 0.072602 |
| BATF2   | 0.035713987  | 0.418649 | 0.493364 |
| BATF3   | 0.144417472  | 0.001014 | 0.002156 |
| BATF    | -0.023194319 | 0.599476 | 0.664835 |
| BAX     | -0.00360135  | 0.935021 | 0.948992 |
| BAZ1A   | 0.161389115  | 0.000235 | 0.000561 |
| BAZ1B   | 0.03812247   | 0.387946 | 0.462769 |
| BAZ2A   | 0.048852169  | 0.268467 | 0.338151 |
| BAZ2B   | -0.229544263 | 1.39E-07 | 5.58E-07 |
| BBC3    | -0.164178565 | 0.000182 | 0.000445 |
| BBOX1   | -0.1900313   | 1.41E-05 | 4.15E-05 |
| BBS10   | 0.079161794  | 0.072667 | 0.10701  |
| BBS12   | -0.004869798 | 0.912215 | 0.931366 |
| BBS1    | -0.413071369 | 1.22E-22 | 4.71E-21 |
| BBS2    | -0.297164241 | 5.84E-12 | 4.52E-11 |
| BBS4    | -0.139428858 | 0.001514 | 0.003119 |
| BBS5    | -0.377605185 | 6.73E-19 | 1.50E-17 |
| BBS7    | 0.195049764  | 8.25E-06 | 2.50E-05 |
| BBS9    | -0.187385123 | 1.87E-05 | 5.37E-05 |
| BBX     | 0.030675334  | 0.487302 | 0.560684 |
| BCAM    | -0.365159425 | 1.09E-17 | 2.02E-16 |
| BCAN    | 0.198560928  | 5.61E-06 | 1.75E-05 |
| BCAP29  | 0.083398489  | 0.058583 | 0.088201 |
| BCAP31  | 0.040279828  | 0.36164  | 0.436287 |
| BCAR1   | 0.001070938  | 0.980658 | 0.985674 |
| BCAR3   | 0.167707786  | 0.000131 | 0.000328 |
| BCAR4   | 0.087232131  | 0.047864 | 0.073457 |
| BCAS1   | -0.005773081 | 0.896017 | 0.918581 |
| BCAS2   | 0.163595564  | 0.000192 | 0.000467 |
| BCAS3   | -0.211787643 | 1.24E-06 | 4.27E-06 |
| BCAS4   | -0.103668649 | 0.01861  | 0.031215 |
| BCAT1   | -0.058333815 | 0.186263 | 0.246298 |
| BCAT2   | -0.216874885 | 6.73E-07 | 2.43E-06 |
| BCCIP   | 0.417659255  | 3.70E-23 | 1.56E-21 |
| BCDIN3D | 0.048998523  | 0.267034 | 0.336622 |

|         |              |          |          |
|---------|--------------|----------|----------|
| BCHE    | -0.199939683 | 4.82E-06 | 1.51E-05 |
| BCKDHA  | -0.249223954 | 9.88E-09 | 4.74E-08 |
| BCKDHB  | -0.145013446 | 0.000966 | 0.002059 |
| BCKDK   | -0.013830248 | 0.754197 | 0.801703 |
| BCL10   | 0.115850281  | 0.0085   | 0.015276 |
| BCL11A  | -0.209537914 | 1.61E-06 | 5.47E-06 |
| BCL11B  | -0.179071103 | 4.37E-05 | 0.000118 |
| BCL2A1  | 0.03817141   | 0.387337 | 0.462134 |
| BCL2L10 | 0.19095129   | 1.28E-05 | 3.78E-05 |
| BCL2L11 | 0.046050999  | 0.296912 | 0.368271 |
| BCL2L12 | 0.181880409  | 3.29E-05 | 9.06E-05 |
| BCL2L13 | 0.172838889  | 8.06E-05 | 0.000208 |
| BCL2L14 | -0.16683434  | 0.000143 | 0.000354 |
| BCL2L15 | -0.170435005 | 0.000102 | 0.000258 |
| BCL2L1  | -0.069113216 | 0.117234 | 0.163808 |
| BCL2L2  | -0.200923666 | 4.32E-06 | 1.37E-05 |
| BCL2    | -0.21889686  | 5.26E-07 | 1.94E-06 |
| BCL3    | 0.091740641  | 0.03741  | 0.058763 |
| BCL6B   | -0.059545489 | 0.177268 | 0.236199 |
| BCL6    | -0.276409781 | 1.75E-10 | 1.08E-09 |
| BCL7A   | -0.100618831 | 0.022392 | 0.036937 |
| BCL7B   | 0.065157112  | 0.139776 | 0.191557 |
| BCL7C   | -0.045897129 | 0.298531 | 0.369911 |
| BCL8    | -0.058261274 | 0.186812 | 0.246975 |
| BCL9L   | -0.006201124 | 0.888356 | 0.912459 |
| BCL9    | 0.017830091  | 0.686449 | 0.743028 |
| BCLAF1  | -0.080927428 | 0.066493 | 0.098889 |
| BCMO1   | -0.12787745  | 0.00365  | 0.007012 |
| BCO2    | -0.319060233 | 1.19E-13 | 1.20E-12 |
| BCORL1  | -0.118332789 | 0.007181 | 0.013096 |
| BCORL2  | 0.106337418  | 0.015771 | 0.026848 |
| BCOR    | -0.095052586 | 0.031027 | 0.049629 |
| BCR     | -0.142207272 | 0.001213 | 0.002542 |
| BCS1L   | 0.086104602  | 0.050831 | 0.077665 |
| BCYRN1  | 0.011125354  | 0.801142 | 0.840704 |
| BDH1    | -0.00870325  | 0.843803 | 0.87638  |
| BDH2    | -0.2855621   | 4.04E-11 | 2.75E-10 |
| BDKRB1  | 0.209505192  | 1.62E-06 | 5.48E-06 |
| BDKRB2  | 0.101657387  | 0.021035 | 0.034913 |
| BDNFOS  | -0.364214013 | 1.34E-17 | 2.45E-16 |
| BDNF    | -0.00636142  | 0.885489 | 0.910263 |
| BDP1    | -0.027032102 | 0.540487 | 0.611285 |
| BEAN    | -0.013981764 | 0.751592 | 0.799554 |
| BECN1   | -0.062917389 | 0.153936 | 0.208474 |

|         |              |          |          |
|---------|--------------|----------|----------|
| BEGAIN  | -0.072820085 | 0.098794 | 0.140748 |
| BEND2   | -0.046756668 | 0.289564 | 0.360678 |
| BEND3   | 0.13143331   | 0.002804 | 0.005504 |
| BEND4   | -0.075706433 | 0.0861   | 0.124437 |
| BEND5   | -0.333692045 | 7.35E-15 | 8.88E-14 |
| BEND6   | 0.210303859  | 1.47E-06 | 5.02E-06 |
| BEND7   | -0.216029981 | 7.45E-07 | 2.67E-06 |
| BEST1   | -0.125580567 | 0.004314 | 0.00819  |
| BEST2   | 0.069490468  | 0.115242 | 0.161408 |
| BEST3   | 0.248541999  | 1.09E-08 | 5.17E-08 |
| BEST4   | -0.111879944 | 0.011061 | 0.019453 |
| BET1L   | -0.093634538 | 0.033636 | 0.053362 |
| BET1    | 0.075275322  | 0.087908 | 0.126793 |
| BET3L   | 0.026513137  | 0.548291 | 0.618642 |
| BEX1    | -0.10385556  | 0.018398 | 0.030887 |
| BEX2    | -0.265489438 | 9.33E-10 | 5.22E-09 |
| BEX4    | -0.339947408 | 2.13E-15 | 2.81E-14 |
| BEX5    | -0.193018871 | 1.03E-05 | 3.07E-05 |
| BEYLA   | -0.038480733 | 0.383499 | 0.458082 |
| BFAR    | -0.021024411 | 0.634065 | 0.695592 |
| BFSP1   | 0.058001065  | 0.188792 | 0.249245 |
| BFSP2   | 0.023283008  | 0.59808  | 0.663619 |
| BGLAP   | -0.039008668 | 0.377002 | 0.451797 |
| BGN     | -0.073631233 | 0.095085 | 0.135909 |
| BHLHA15 | 0.210688919  | 1.41E-06 | 4.82E-06 |
| BHLHB9  | -0.057248005 | 0.194607 | 0.255792 |
| BHLHE22 | -0.199168876 | 5.25E-06 | 1.64E-05 |
| BHLHE23 | 0.002339215  | 0.957767 | 0.967689 |
| BHLHE40 | -0.126358055 | 0.004078 | 0.007775 |
| BHLHE41 | -0.212283619 | 1.17E-06 | 4.04E-06 |
| BHMT2   | 0.034466281  | 0.435099 | 0.509708 |
| BHMT    | -0.068363384 | 0.121272 | 0.168849 |
| BICC1   | -0.110032769 | 0.01247  | 0.021674 |
| BICD1   | 0.130288414  | 0.003055 | 0.005956 |
| BICD2   | -0.209199235 | 1.68E-06 | 5.67E-06 |
| BID     | 0.147353971  | 0.000796 | 0.001723 |
| BIK     | 0.164200934  | 0.000182 | 0.000444 |
| BIN1    | -0.004949219 | 0.910789 | 0.93029  |
| BIN2    | -0.210477906 | 1.44E-06 | 4.93E-06 |
| BIN3    | -0.147542808 | 0.000784 | 0.001698 |
| BIRC2   | 0.151304067  | 0.000571 | 0.001267 |
| BIRC3   | -0.01425341  | 0.746929 | 0.795397 |
| BIRC5   | 0.504031941  | 1.56E-34 | 3.99E-32 |
| BIRC6   | -0.075385611 | 0.087442 | 0.126213 |



|         |              |          |          |
|---------|--------------|----------|----------|
| BIRC7   | -0.251873567 | 6.80E-09 | 3.33E-08 |
| BIRC8   | 0.010636439  | 0.809711 | 0.847888 |
| BIVM    | -0.126409335 | 0.004063 | 0.007747 |
| BLCAP   | -0.187963394 | 1.76E-05 | 5.08E-05 |
| BLID    | 0.167539741  | 0.000134 | 0.000333 |
| BLK     | -0.263938916 | 1.18E-09 | 6.46E-09 |
| BLMH    | 0.033556015  | 0.447332 | 0.5216   |
| BLM     | 0.411943513  | 1.63E-22 | 6.12E-21 |
| BLNK    | -0.318715539 | 1.27E-13 | 1.27E-12 |
| BLOC1S1 | 0.048401719  | 0.272911 | 0.343035 |
| BLOC1S2 | 0.180244362  | 3.89E-05 | 0.000106 |
| BLOC1S3 | -0.026403016 | 0.549955 | 0.620176 |
| BLVRA   | -0.128679455 | 0.003442 | 0.006647 |
| BLVRB   | 0.005102599  | 0.908036 | 0.928095 |
| BLZF1   | 0.183661126  | 2.75E-05 | 7.66E-05 |
| BMF     | -0.23540868  | 6.46E-08 | 2.74E-07 |
| BMI1    | 0.098158313  | 0.025912 | 0.042179 |
| BMP10   | -0.091225651 | 0.038497 | 0.060327 |
| BMP15   | -0.100146498 | 0.023033 | 0.037899 |
| BMP1    | 0.041904674  | 0.342583 | 0.416615 |
| BMP2K   | -0.063896054 | 0.14762  | 0.200942 |
| BMP2    | -0.10213132  | 0.020441 | 0.033993 |
| BMP3    | -0.334495923 | 6.28E-15 | 7.70E-14 |
| BMP4    | -0.120231798 | 0.006299 | 0.011611 |
| BMP5    | -0.180743579 | 3.69E-05 | 0.000101 |
| BMP6    | 0.06455272   | 0.143495 | 0.196114 |
| BMP7    | -0.184679007 | 2.47E-05 | 6.95E-05 |
| BMP8A   | 0.089173525  | 0.043095 | 0.066816 |
| BMP8B   | -0.001638818 | 0.970405 | 0.977693 |
| BMPER   | -0.231025595 | 1.15E-07 | 4.68E-07 |
| BMPR1A  | 0.128021213  | 0.003612 | 0.006946 |
| BMPR1B  | 0.10509823   | 0.017039 | 0.028803 |
| BMPR2   | -0.180314411 | 3.86E-05 | 0.000105 |
| BMS1P4  | -0.225241258 | 2.40E-07 | 9.29E-07 |
| BMS1P5  | -0.272329766 | 3.29E-10 | 1.96E-09 |
| BMS1    | 0.216139413  | 7.36E-07 | 2.64E-06 |
| BMX     | -0.231466143 | 1.08E-07 | 4.44E-07 |
| BNC1    | 0.037165504  | 0.399978 | 0.47456  |
| BNC2    | -0.052014555 | 0.238666 | 0.305446 |
| BNIP1   | 0.168654374  | 0.00012  | 0.000302 |
| BNIP2   | -0.076541453 | 0.082683 | 0.120098 |
| BNIP3L  | -0.141790283 | 0.001254 | 0.002623 |
| BNIP3   | 0.209054694  | 1.70E-06 | 5.76E-06 |
| BNIPL   | -0.303021141 | 2.13E-12 | 1.77E-11 |

|        |              |          |          |
|--------|--------------|----------|----------|
| BOC    | -0.246773121 | 1.39E-08 | 6.51E-08 |
| BOD1L  | -0.11439501  | 0.00937  | 0.016719 |
| BOD1   | 0.134818897  | 0.002169 | 0.004347 |
| BOK    | -0.229170196 | 1.45E-07 | 5.83E-07 |
| BOLA1  | 0.106846369  | 0.015275 | 0.026083 |
| BOLA2  | 0.302299239  | 2.41E-12 | 1.98E-11 |
| BOLA3  | 0.41303913   | 1.23E-22 | 4.73E-21 |
| BOLL   | 0.077737891  | 0.077979 | 0.113994 |
| BOP1   | 0.289827948  | 2.00E-11 | 1.43E-10 |
| BPESC1 | 0.060240333  | 0.172257 | 0.230275 |
| BPGM   | -0.071947943 | 0.10291  | 0.145884 |
| BPHL   | 0.208269591  | 1.87E-06 | 6.28E-06 |
| BPIL1  | 0.01949819   | 0.658886 | 0.718054 |
| BPIL2  | -0.055525508 | 0.208398 | 0.271684 |
| BPIL3  | 0.026982073  | 0.541237 | 0.611898 |
| BPI    | -0.120321379 | 0.00626  | 0.011543 |
| BPNT1  | 0.161231385  | 0.000239 | 0.000568 |
| BPTF   | -0.143447835 | 0.001097 | 0.002318 |
| BPY2   | -0.017145062 | 0.697893 | 0.753617 |
| BRAF   | 0.043419579  | 0.325402 | 0.398563 |
| BRAP   | 0.22320703   | 3.09E-07 | 1.18E-06 |
| BRCA1  | 0.338722082  | 2.72E-15 | 3.54E-14 |
| BRCA2  | 0.247378081  | 1.28E-08 | 6.01E-08 |
| BRCC3  | 0.162674977  | 0.000209 | 0.000505 |
| BRD1   | -0.349090082 | 3.32E-16 | 4.93E-15 |
| BRD2   | -0.02985101  | 0.499084 | 0.572165 |
| BRD3   | -0.022239206 | 0.614596 | 0.678329 |
| BRD4   | -0.004904542 | 0.911591 | 0.930914 |
| BRD7P3 | 0.006892988  | 0.875995 | 0.903104 |
| BRD7   | 0.045849408  | 0.299034 | 0.37042  |
| BRD8   | -0.173135246 | 7.84E-05 | 0.000202 |
| BRD9   | -0.031012378 | 0.482528 | 0.55628  |
| BRDT   | 0.048091834  | 0.275997 | 0.346435 |
| BREA2  | -0.176528454 | 5.63E-05 | 0.000149 |
| BRE    | -0.059352933 | 0.178675 | 0.237742 |
| BRF1   | -0.127048228 | 0.003878 | 0.007422 |
| BRF2   | 0.127340297  | 0.003797 | 0.007276 |
| BRI3BP | 0.397979677  | 5.42E-21 | 1.64E-19 |
| BRI3   | -0.013801028 | 0.754699 | 0.801979 |
| BRIP1  | 0.324307467  | 4.46E-14 | 4.77E-13 |
| BRIX1  | 0.373352261  | 1.77E-18 | 3.68E-17 |
| BRMS1L | 0.188696534  | 1.63E-05 | 4.72E-05 |
| BRMS1  | 0.147972391  | 0.000756 | 0.001644 |
| BRP44L | -0.157012113 | 0.000348 | 0.000802 |

|        |              |          |          |
|--------|--------------|----------|----------|
| BRP44  | 0.046020217  | 0.297236 | 0.368512 |
| BRPF1  | -0.10466704  | 0.0175   | 0.029498 |
| BRPF3  | -0.069248708 | 0.116515 | 0.162963 |
| BRS3   | 0.029023592  | 0.51106  | 0.583351 |
| BRSK1  | -0.041915908 | 0.342453 | 0.416584 |
| BRSK2  | 0.037331978  | 0.397869 | 0.472582 |
| BRWD1  | -0.303548604 | 1.94E-12 | 1.62E-11 |
| BRWD3  | -0.01554092  | 0.724955 | 0.776882 |
| BSCL2  | -0.126943522 | 0.003908 | 0.007474 |
| BSDC1  | -0.289024267 | 2.29E-11 | 1.62E-10 |
| BSG    | 0.075082665  | 0.088725 | 0.127825 |
| BSND   | 0.047861765  | 0.278303 | 0.348854 |
| BSN    | -0.20516081  | 2.67E-06 | 8.73E-06 |
| BSPRY  | -0.018484379 | 0.675586 | 0.733255 |
| BST1   | -0.077599413 | 0.078512 | 0.114698 |
| BST2   | -0.064805265 | 0.141932 | 0.194204 |
| BSX    | 0.033365378  | 0.449918 | 0.524279 |
| BTAf1  | -0.177008447 | 5.36E-05 | 0.000142 |
| BTBD10 | 0.183975059  | 2.66E-05 | 7.44E-05 |
| BTBD11 | 0.089605806  | 0.04209  | 0.065435 |
| BTBD12 | -0.137706064 | 0.001734 | 0.003533 |
| BTBD16 | 0.188718306  | 1.62E-05 | 4.71E-05 |
| BTBD17 | 0.035065573  | 0.427152 | 0.501758 |
| BTBD18 | -0.19509385  | 8.21E-06 | 2.49E-05 |
| BTBD19 | -0.217718411 | 6.08E-07 | 2.21E-06 |
| BTBD1  | 0.170156962  | 0.000104 | 0.000265 |
| BTBD2  | 0.000670459  | 0.98789  | 0.990964 |
| BTBD3  | -0.007974535 | 0.856733 | 0.88709  |
| BTBD6  | 0.052168667  | 0.237276 | 0.303978 |
| BTBD7  | -0.022178121 | 0.615569 | 0.679215 |
| BTBD8  | 0.000688969  | 0.987556 | 0.99069  |
| BTBD9  | -0.401797492 | 2.11E-21 | 6.88E-20 |
| BTC    | -0.160823798 | 0.000248 | 0.000588 |
| BTd    | -0.164214169 | 0.000182 | 0.000443 |
| BTF3L1 | 0.034173217  | 0.439016 | 0.513311 |
| BTF3L4 | 0.212987203  | 1.07E-06 | 3.75E-06 |
| BTF3   | 0.136723993  | 0.001872 | 0.003791 |
| BTG1   | 0.007183998  | 0.870804 | 0.899284 |
| BTG2   | -0.358990831 | 4.14E-17 | 7.03E-16 |
| BTG3   | -0.192110368 | 1.13E-05 | 3.36E-05 |
| BTG4   | -0.10816487  | 0.014053 | 0.024199 |
| BTK    | -0.264025974 | 1.16E-09 | 6.39E-09 |
| BTLA   | -0.204355509 | 2.93E-06 | 9.52E-06 |
| BTN1A1 | -0.141687318 | 0.001265 | 0.002644 |

|           |              |          |          |
|-----------|--------------|----------|----------|
| BTN2A1    | -0.250222199 | 8.59E-09 | 4.15E-08 |
| BTN2A2    | -0.398413585 | 4.87E-21 | 1.49E-19 |
| BTN2A3    | -0.264290774 | 1.12E-09 | 6.16E-09 |
| BTN3A1    | -0.218250601 | 5.70E-07 | 2.08E-06 |
| BTN3A2    | -0.199946338 | 4.81E-06 | 1.51E-05 |
| BTN3A3    | -0.243502489 | 2.18E-08 | 9.91E-08 |
| BTNL2     | -0.085471562 | 0.052563 | 0.08003  |
| BTNL3     | -0.076213177 | 0.084013 | 0.121746 |
| BTNL8     | -0.193994887 | 9.25E-06 | 2.78E-05 |
| BTNL9     | -0.48000762  | 4.88E-31 | 6.38E-29 |
| BTRC      | -0.081804998 | 0.063589 | 0.094958 |
| BUB1B     | 0.507759501  | 4.21E-35 | 1.22E-32 |
| BUB1      | 0.474353926  | 2.96E-30 | 3.44E-28 |
| BUB3      | 0.473943881  | 3.37E-30 | 3.90E-28 |
| BUD13     | 0.120375134  | 0.006237 | 0.011501 |
| BUD31     | 0.275601077  | 1.98E-10 | 1.22E-09 |
| BVES      | 0.038929609  | 0.377971 | 0.452781 |
| BYSL      | 0.421142239  | 1.48E-23 | 6.58E-22 |
| BZRAP1    | -0.443797862 | 2.90E-26 | 1.95E-24 |
| BZW1      | 0.468943289  | 1.61E-29 | 1.65E-27 |
| BZW2      | 0.403009109  | 1.56E-21 | 5.20E-20 |
| C10orf105 | -0.46867111  | 1.76E-29 | 1.77E-27 |
| C10orf107 | -0.315817882 | 2.16E-13 | 2.09E-12 |
| C10orf108 | 0.06075907   | 0.168585 | 0.225956 |
| C10orf10  | -0.172784685 | 8.11E-05 | 0.000209 |
| C10orf110 | -0.150485316 | 0.000612 | 0.001351 |
| C10orf111 | -0.168899312 | 0.000117 | 0.000296 |
| C10orf113 | -0.058149581 | 0.18766  | 0.24803  |
| C10orf114 | 0.086713239  | 0.049211 | 0.075397 |
| C10orf116 | -0.247890526 | 1.19E-08 | 5.63E-08 |
| C10orf118 | -0.103723342 | 0.018548 | 0.031121 |
| C10orf119 | 0.359365397  | 3.82E-17 | 6.52E-16 |
| C10orf11  | -0.243872709 | 2.07E-08 | 9.46E-08 |
| C10orf120 | 0.023840424  | 0.589344 | 0.655562 |
| C10orf122 | 0.005544153  | 0.900118 | 0.921966 |
| C10orf125 | -0.01115237  | 0.80067  | 0.840403 |
| C10orf128 | -0.226542536 | 2.03E-07 | 7.98E-07 |
| C10orf129 | -0.001296585 | 0.976583 | 0.982729 |
| C10orf12  | 0.1735437    | 7.53E-05 | 0.000195 |
| C10orf131 | -0.045305653 | 0.304808 | 0.376568 |
| C10orf137 | -0.095999369 | 0.029383 | 0.047268 |
| C10orf140 | -0.148991198 | 0.000694 | 0.00152  |
| C10orf18  | 0.164311388  | 0.00018  | 0.00044  |
| C10orf25  | 0.01902452   | 0.666668 | 0.725151 |

|          |              |          |          |
|----------|--------------|----------|----------|
| C10orf26 | -0.133574764 | 0.002385 | 0.004745 |
| C10orf27 | 0.070724664  | 0.108911 | 0.153434 |
| C10orf28 | -0.14106563  | 0.001329 | 0.002764 |
| C10orf2  | 0.386392237  | 8.77E-20 | 2.20E-18 |
| C10orf32 | -0.176929754 | 5.41E-05 | 0.000143 |
| C10orf35 | -0.01785838  | 0.685978 | 0.742719 |
| C10orf40 | 0.05027564   | 0.254752 | 0.323287 |
| C10orf41 | -0.020182947 | 0.647702 | 0.707949 |
| C10orf46 | 0.207831931  | 1.96E-06 | 6.58E-06 |
| C10orf47 | 0.050729368  | 0.250484 | 0.318511 |
| C10orf4  | -0.067711648 | 0.12487  | 0.173122 |
| C10orf50 | -0.269893327 | 4.79E-10 | 2.79E-09 |
| C10orf53 | -0.162239453 | 0.000218 | 0.000524 |
| C10orf54 | -0.330439741 | 1.38E-14 | 1.60E-13 |
| C10orf55 | -0.002476938 | 0.955283 | 0.96567  |
| C10orf57 | 0.091277479  | 0.038386 | 0.060163 |
| C10orf58 | 0.065191636  | 0.139566 | 0.191307 |
| C10orf62 | 0.07430636   | 0.092083 | 0.132043 |
| C10orf67 | -0.26136606  | 1.72E-09 | 9.20E-09 |
| C10orf68 | -0.314518212 | 2.74E-13 | 2.61E-12 |
| C10orf71 | 0.028712972  | 0.515594 | 0.58787  |
| C10orf72 | -0.295253788 | 8.08E-12 | 6.14E-11 |
| C10orf75 | 0.011233059  | 0.799258 | 0.839362 |
| C10orf76 | -0.290404333 | 1.82E-11 | 1.31E-10 |
| C10orf78 | 0.22517369   | 2.42E-07 | 9.36E-07 |
| C10orf79 | -0.231679006 | 1.05E-07 | 4.32E-07 |
| C10orf81 | -0.169834606 | 0.000108 | 0.000273 |
| C10orf82 | 0.080567152  | 0.067717 | 0.100484 |
| C10orf84 | 0.221712889  | 3.72E-07 | 1.40E-06 |
| C10orf88 | 0.258077986  | 2.79E-09 | 1.44E-08 |
| C10orf90 | 0.294051259  | 9.90E-12 | 7.41E-11 |
| C10orf91 | 0.081316     | 0.065194 | 0.097116 |
| C10orf93 | -0.178871972 | 4.46E-05 | 0.00012  |
| C10orf95 | -0.177085305 | 5.32E-05 | 0.000141 |
| C10orf96 | 0.06511752   | 0.140017 | 0.191807 |
| C10orf99 | -0.00967671  | 0.826595 | 0.861956 |
| C11orf10 | 0.255840091  | 3.86E-09 | 1.95E-08 |
| C11orf16 | -0.217759546 | 6.05E-07 | 2.20E-06 |
| C11orf17 | 0.07163657   | 0.104412 | 0.147665 |
| C11orf1  | -0.025188572 | 0.56846  | 0.636904 |
| C11orf20 | 0.102703539  | 0.019742 | 0.032944 |
| C11orf21 | -0.389289475 | 4.41E-20 | 1.16E-18 |
| C11orf24 | 0.321420712  | 7.68E-14 | 7.92E-13 |
| C11orf2  | -0.156973479 | 0.000349 | 0.000805 |

|          |              |          |          |
|----------|--------------|----------|----------|
| C11orf30 | 0.015699652  | 0.722261 | 0.774411 |
| C11orf31 | 0.144738801  | 0.000988 | 0.002102 |
| C11orf34 | -0.057015377 | 0.196429 | 0.257948 |
| C11orf35 | -0.325807289 | 3.36E-14 | 3.67E-13 |
| C11orf36 | 0.075305353  | 0.087781 | 0.126656 |
| C11orf41 | 0.037041163  | 0.401557 | 0.47617  |
| C11orf42 | -0.17307345  | 7.88E-05 | 0.000204 |
| C11orf45 | -0.20066202  | 4.44E-06 | 1.40E-05 |
| C11orf46 | -0.003230187 | 0.941705 | 0.953778 |
| C11orf48 | 0.286979202  | 3.20E-11 | 2.22E-10 |
| C11orf49 | -0.151460731 | 0.000563 | 0.001252 |
| C11orf51 | 0.134977439  | 0.002142 | 0.004301 |
| C11orf52 | -0.252944733 | 5.84E-09 | 2.89E-08 |
| C11orf53 | 0.031849003  | 0.470789 | 0.544505 |
| C11orf54 | -0.081167631 | 0.065688 | 0.097819 |
| C11orf57 | 0.121696508  | 0.005687 | 0.010573 |
| C11orf58 | 0.139977126  | 0.00145  | 0.002995 |
| C11orf59 | 0.172412546  | 8.40E-05 | 0.000216 |
| C11orf61 | -0.326712742 | 2.83E-14 | 3.12E-13 |
| C11orf63 | -0.211624369 | 1.26E-06 | 4.35E-06 |
| C11orf64 | 0.049632088  | 0.260891 | 0.329689 |
| C11orf65 | -0.189216345 | 1.54E-05 | 4.49E-05 |
| C11orf66 | -0.317659703 | 1.54E-13 | 1.52E-12 |
| C11orf67 | -0.105861028 | 0.016248 | 0.027575 |
| C11orf68 | -0.109700266 | 0.01274  | 0.022104 |
| C11orf70 | -0.115450961 | 0.008731 | 0.015655 |
| C11orf71 | -0.110024262 | 0.012477 | 0.02168  |
| C11orf73 | 0.223314651  | 3.05E-07 | 1.17E-06 |
| C11orf74 | -0.102339813 | 0.020184 | 0.033601 |
| C11orf75 | -0.094333196 | 0.032328 | 0.051496 |
| C11orf80 | 0.105085492  | 0.017052 | 0.028821 |
| C11orf82 | 0.437764532  | 1.60E-25 | 9.66E-24 |
| C11orf83 | 0.205675193  | 2.52E-06 | 8.28E-06 |
| C11orf84 | 0.168718086  | 0.00012  | 0.0003   |
| C11orf85 | 0.028893542  | 0.512956 | 0.585281 |
| C11orf86 | 0.211165407  | 1.33E-06 | 4.58E-06 |
| C11orf87 | -0.023719984 | 0.591226 | 0.657254 |
| C11orf88 | -0.22622352  | 2.12E-07 | 8.28E-07 |
| C11orf90 | 0.082221926  | 0.062246 | 0.093211 |
| C11orf92 | -0.415131674 | 7.15E-23 | 2.86E-21 |
| C11orf93 | -0.365454978 | 1.02E-17 | 1.91E-16 |
| C11orf94 | 0.003804542  | 0.931364 | 0.946228 |
| C11orf95 | -0.092514629 | 0.035826 | 0.056541 |
| C11orf9  | -0.095021366 | 0.031082 | 0.049706 |

|          |              |          |          |
|----------|--------------|----------|----------|
| C12orf10 | 0.185192573  | 2.35E-05 | 6.61E-05 |
| C12orf11 | 0.444439775  | 2.41E-26 | 1.65E-24 |
| C12orf12 | -0.028717138 | 0.515533 | 0.587858 |
| C12orf23 | 0.432209245  | 7.45E-25 | 4.06E-23 |
| C12orf24 | 0.269271825  | 5.27E-10 | 3.05E-09 |
| C12orf26 | 0.070863017  | 0.108219 | 0.152566 |
| C12orf27 | -0.125493773 | 0.004341 | 0.008239 |
| C12orf29 | 0.405215898  | 9.00E-22 | 3.08E-20 |
| C12orf32 | 0.344020999  | 9.39E-16 | 1.30E-14 |
| C12orf34 | 0.247889489  | 1.19E-08 | 5.63E-08 |
| C12orf35 | -0.043902267 | 0.320048 | 0.392823 |
| C12orf36 | 0.101172806  | 0.021659 | 0.03585  |
| C12orf39 | 0.248262363  | 1.13E-08 | 5.36E-08 |
| C12orf40 | -0.029992649 | 0.497049 | 0.570126 |
| C12orf41 | 0.241682809  | 2.79E-08 | 1.25E-07 |
| C12orf42 | -0.033938653 | 0.442166 | 0.516481 |
| C12orf43 | 0.292689732  | 1.24E-11 | 9.18E-11 |
| C12orf44 | 0.298516531  | 4.64E-12 | 3.63E-11 |
| C12orf45 | 0.324875967  | 4.01E-14 | 4.33E-13 |
| C12orf47 | 0.16400279   | 0.000185 | 0.000451 |
| C12orf48 | 0.547575294  | 1.26E-41 | 1.48E-38 |
| C12orf49 | 0.006201563  | 0.888348 | 0.912459 |
| C12orf4  | 0.221322537  | 3.91E-07 | 1.46E-06 |
| C12orf50 | -0.009052762 | 0.837615 | 0.870949 |
| C12orf51 | -0.144202561 | 0.001032 | 0.002189 |
| C12orf52 | 0.239059878  | 3.98E-08 | 1.74E-07 |
| C12orf53 | -0.062383309 | 0.157468 | 0.212724 |
| C12orf54 | -0.053732612 | 0.223489 | 0.288572 |
| C12orf56 | 0.214437155  | 9.03E-07 | 3.19E-06 |
| C12orf57 | 0.12029009   | 0.006274 | 0.011567 |
| C12orf59 | -0.171012395 | 9.61E-05 | 0.000245 |
| C12orf5  | 0.296676056  | 6.35E-12 | 4.89E-11 |
| C12orf60 | 0.121503132  | 0.005765 | 0.0107   |
| C12orf61 | 0.023334202  | 0.597275 | 0.662873 |
| C12orf62 | 0.007759595  | 0.860555 | 0.890309 |
| C12orf63 | -0.191640143 | 1.19E-05 | 3.53E-05 |
| C12orf65 | 0.10543558   | 0.016685 | 0.028246 |
| C12orf66 | 0.287402729  | 2.99E-11 | 2.08E-10 |
| C12orf68 | -0.151570746 | 0.000558 | 0.00124  |
| C12orf69 | -0.324232616 | 4.53E-14 | 4.83E-13 |
| C12orf70 | 0.236831989  | 5.36E-08 | 2.29E-07 |
| C12orf71 | -0.244941592 | 1.79E-08 | 8.25E-08 |
| C12orf72 | -0.238001995 | 4.58E-08 | 1.98E-07 |
| C12orf73 | 0.323962238  | 4.76E-14 | 5.07E-13 |

|           |              |          |          |
|-----------|--------------|----------|----------|
| C12orf74  | -0.153285047 | 0.000482 | 0.001083 |
| C12orf75  | 0.07666348   | 0.082193 | 0.119455 |
| C12orf76  | -0.16083441  | 0.000247 | 0.000588 |
| C12orf77  | -0.043549025 | 0.323961 | 0.397065 |
| C13orf15  | -0.31815488  | 1.41E-13 | 1.40E-12 |
| C13orf16  | 0.070219865  | 0.111467 | 0.156614 |
| C13orf18  | -0.175154978 | 6.44E-05 | 0.000169 |
| C13orf1   | 0.131652687  | 0.002758 | 0.005423 |
| C13orf23  | 0.105355897  | 0.016768 | 0.028379 |
| C13orf26  | -0.151595904 | 0.000557 | 0.001238 |
| C13orf27  | 0.344739408  | 8.11E-16 | 1.13E-14 |
| C13orf29  | 0.213182115  | 1.05E-06 | 3.67E-06 |
| C13orf30  | -0.274278571 | 2.43E-10 | 1.48E-09 |
| C13orf31  | -0.055435658 | 0.209136 | 0.272522 |
| C13orf33  | 0.129614255  | 0.003212 | 0.006238 |
| C13orf34  | 0.403220828  | 1.48E-21 | 4.94E-20 |
| C13orf35  | -0.061940816 | 0.16044  | 0.216257 |
| C13orf36  | -0.222132386 | 3.53E-07 | 1.34E-06 |
| C13orf37  | 0.395480374  | 9.97E-21 | 2.89E-19 |
| C13orf38  | 0.152945892  | 0.000496 | 0.001112 |
| C13orf39  | -0.143922004 | 0.001056 | 0.002235 |
| C14orf101 | 0.137448625  | 0.001769 | 0.003597 |
| C14orf102 | -0.115641762 | 0.00862  | 0.015468 |
| C14orf104 | 0.478159754  | 8.84E-31 | 1.10E-28 |
| C14orf105 | -0.075842648 | 0.085535 | 0.123745 |
| C14orf106 | 0.27126885   | 3.88E-10 | 2.29E-09 |
| C14orf109 | 0.136902544  | 0.001846 | 0.003743 |
| C14orf115 | -0.096529655 | 0.028495 | 0.045969 |
| C14orf118 | 0.207073838  | 2.14E-06 | 7.12E-06 |
| C14orf119 | 0.299657266  | 3.81E-12 | 3.02E-11 |
| C14orf126 | 0.337137285  | 3.73E-15 | 4.74E-14 |
| C14orf128 | 0.134052514  | 0.0023   | 0.004587 |
| C14orf129 | 0.430150712  | 1.31E-24 | 6.77E-23 |
| C14orf132 | -0.294778147 | 8.76E-12 | 6.61E-11 |
| C14orf135 | 0.141258153  | 0.001309 | 0.002726 |
| C14orf138 | 0.113270648  | 0.010095 | 0.017909 |
| C14orf139 | -0.341938946 | 1.43E-15 | 1.93E-14 |
| C14orf142 | 0.141922131  | 0.001241 | 0.002597 |
| C14orf143 | 0.19750255   | 6.31E-06 | 1.95E-05 |
| C14orf145 | 0.204308637  | 2.94E-06 | 9.57E-06 |
| C14orf147 | 0.318666666  | 1.28E-13 | 1.28E-12 |
| C14orf148 | -0.136666029 | 0.00188  | 0.003806 |
| C14orf149 | 0.16326417   | 0.000198 | 0.00048  |
| C14orf153 | 0.286106942  | 3.70E-11 | 2.54E-10 |



|            |              |          |          |
|------------|--------------|----------|----------|
| C14orf156  | 0.370485238  | 3.36E-18 | 6.72E-17 |
| C14orf159  | -0.271892009 | 3.52E-10 | 2.09E-09 |
| C14orf162  | 0.040713935  | 0.356485 | 0.431034 |
| C14orf165  | 0.037544911  | 0.395181 | 0.470087 |
| C14orf166B | -0.092162993 | 0.036539 | 0.057516 |
| C14orf166  | 0.519727972  | 5.66E-37 | 2.26E-34 |
| C14orf167  | 0.061436912  | 0.163876 | 0.220324 |
| C14orf169  | 0.243454192  | 2.20E-08 | 9.97E-08 |
| C14orf174  | -0.095195754 | 0.030773 | 0.049259 |
| C14orf176  | -0.156211726 | 0.000373 | 0.000855 |
| C14orf178  | -0.180975064 | 3.61E-05 | 9.87E-05 |
| C14orf179  | 0.134530083  | 0.002217 | 0.004436 |
| C14orf180  | -0.260784778 | 1.88E-09 | 9.96E-09 |
| C14orf181  | -0.150818674 | 0.000595 | 0.001316 |
| C14orf182  | -0.059171907 | 0.180006 | 0.23925  |
| C14orf183  | -0.017465617 | 0.692529 | 0.748514 |
| C14orf184  | 0.024086761  | 0.585501 | 0.652123 |
| C14orf19   | 0.094280859  | 0.032424 | 0.051629 |
| C14orf1    | 0.140008429  | 0.001446 | 0.002988 |
| C14orf21   | 0.064317873  | 0.14496  | 0.197873 |
| C14orf23   | 0.165044044  | 0.000168 | 0.000413 |
| C14orf28   | -0.027895908 | 0.52762  | 0.599719 |
| C14orf2    | 0.314510859  | 2.75E-13 | 2.61E-12 |
| C14orf33   | 0.409658983  | 2.92E-22 | 1.06E-20 |
| C14orf34   | 0.225295694  | 2.38E-07 | 9.23E-07 |
| C14orf37   | 0.136799922  | 0.001861 | 0.00377  |
| C14orf39   | -0.080431367 | 0.068183 | 0.101123 |
| C14orf43   | -0.124209076 | 0.00476  | 0.008982 |
| C14orf45   | -0.106700964 | 0.015416 | 0.0263   |
| C14orf48   | -0.088688287 | 0.044248 | 0.068465 |
| C14orf49   | -0.188738371 | 1.62E-05 | 4.70E-05 |
| C14orf4    | -0.097339648 | 0.027184 | 0.044039 |
| C14orf50   | 0.042632055  | 0.334263 | 0.40804  |
| C14orf53   | 0.138310719  | 0.001654 | 0.003381 |
| C14orf64   | -0.33796982  | 3.16E-15 | 4.07E-14 |
| C14orf68   | 0.044749082  | 0.310793 | 0.382851 |
| C14orf70   | 0.034403478  | 0.435937 | 0.510457 |
| C14orf72   | 0.012807448  | 0.771852 | 0.816501 |
| C14orf73   | -0.291122681 | 1.62E-11 | 1.17E-10 |
| C14orf79   | -0.045710034 | 0.300507 | 0.372014 |
| C14orf80   | 0.17001946   | 0.000106 | 0.000268 |
| C14orf86   | -0.092359454 | 0.036139 | 0.056981 |
| C14orf93   | -0.079102231 | 0.072883 | 0.107274 |
| C15orf17   | -0.387750537 | 6.36E-20 | 1.63E-18 |

|          |              |          |          |
|----------|--------------|----------|----------|
| C15orf21 | 0.123546174  | 0.00499  | 0.009376 |
| C15orf23 | 0.500146477  | 5.98E-34 | 1.39E-31 |
| C15orf24 | 0.158904128  | 0.000294 | 0.000688 |
| C15orf26 | -0.177163276 | 5.28E-05 | 0.00014  |
| C15orf27 | -0.267400748 | 7.00E-10 | 3.98E-09 |
| C15orf28 | -0.231525462 | 1.07E-07 | 4.40E-07 |
| C15orf29 | 0.146521223  | 0.000853 | 0.001835 |
| C15orf2  | -0.148196201 | 0.000742 | 0.001617 |
| C15orf32 | -0.028311326 | 0.521488 | 0.593492 |
| C15orf33 | -0.087716064 | 0.046636 | 0.071804 |
| C15orf34 | -0.357118923 | 6.17E-17 | 1.02E-15 |
| C15orf37 | -0.189225222 | 1.54E-05 | 4.49E-05 |
| C15orf38 | -0.153618244 | 0.000468 | 0.001054 |
| C15orf39 | -0.061838335 | 0.161134 | 0.217032 |
| C15orf40 | -0.021975101 | 0.618806 | 0.682148 |
| C15orf41 | 0.222515844  | 3.37E-07 | 1.28E-06 |
| C15orf42 | 0.395769331  | 9.29E-21 | 2.71E-19 |
| C15orf43 | -0.021785337 | 0.621839 | 0.684887 |
| C15orf44 | 0.273819914  | 2.61E-10 | 1.58E-09 |
| C15orf48 | 0.23413596   | 7.64E-08 | 3.20E-07 |
| C15orf50 | -0.083109805 | 0.059465 | 0.089381 |
| C15orf51 | -0.345677684 | 6.70E-16 | 9.48E-15 |
| C15orf52 | -0.245139256 | 1.74E-08 | 8.04E-08 |
| C15orf53 | -0.012209337 | 0.782232 | 0.824864 |
| C15orf54 | -0.092761974 | 0.035332 | 0.055832 |
| C15orf55 | -0.049428167 | 0.262858 | 0.331922 |
| C15orf56 | -0.269891588 | 4.79E-10 | 2.79E-09 |
| C15orf57 | -0.061789364 | 0.161467 | 0.217421 |
| C15orf58 | -0.026148726 | 0.553805 | 0.623455 |
| C15orf59 | -0.476385597 | 1.56E-30 | 1.89E-28 |
| C15orf5  | -0.068958348 | 0.118059 | 0.164788 |
| C15orf60 | 0.105321417  | 0.016804 | 0.028435 |
| C15orf61 | 0.129223875  | 0.003306 | 0.006407 |
| C15orf62 | -0.334061388 | 6.84E-15 | 8.30E-14 |
| C15orf63 | 0.290415042  | 1.82E-11 | 1.31E-10 |
| C16orf11 | 0.058933555  | 0.18177  | 0.241153 |
| C16orf13 | -0.019500817 | 0.658843 | 0.718046 |
| C16orf3  | -0.175266921 | 6.37E-05 | 0.000167 |
| C16orf42 | -0.071894366 | 0.103168 | 0.146187 |
| C16orf45 | -0.072767247 | 0.09904  | 0.141083 |
| C16orf46 | 0.003626068  | 0.934576 | 0.94872  |
| C16orf48 | -0.321264976 | 7.90E-14 | 8.12E-13 |
| C16orf52 | -0.158008086 | 0.000319 | 0.00074  |
| C16orf53 | 7.39E-05     | 0.998665 | 0.999165 |

|           |              |          |          |
|-----------|--------------|----------|----------|
| C16orf54  | -0.299517057 | 3.91E-12 | 3.09E-11 |
| C16orf55  | -0.137543402 | 0.001756 | 0.003573 |
| C16orf57  | 0.102532056  | 0.019949 | 0.033242 |
| C16orf58  | -0.219000993 | 5.20E-07 | 1.92E-06 |
| C16orf59  | 0.332055133  | 1.01E-14 | 1.19E-13 |
| C16orf5   | -0.389905418 | 3.81E-20 | 1.02E-18 |
| C16orf61  | 0.34748068   | 4.63E-16 | 6.74E-15 |
| C16orf62  | -0.076531649 | 0.082722 | 0.12012  |
| C16orf63  | 0.194532139  | 8.73E-06 | 2.64E-05 |
| C16orf68  | 0.036244702  | 0.411763 | 0.486426 |
| C16orf70  | 0.011817521  | 0.789053 | 0.83074  |
| C16orf71  | -0.279342134 | 1.10E-10 | 7.01E-10 |
| C16orf72  | 0.052754994  | 0.232038 | 0.298128 |
| C16orf73  | 0.147115829  | 0.000812 | 0.001755 |
| C16orf74  | 0.087385912  | 0.047471 | 0.072926 |
| C16orf75  | 0.22717264   | 1.88E-07 | 7.40E-07 |
| C16orf78  | -0.002149003 | 0.961198 | 0.970325 |
| C16orf79  | -0.245962193 | 1.56E-08 | 7.23E-08 |
| C16orf7   | -0.08171577  | 0.06388  | 0.095357 |
| C16orf80  | 0.116086561  | 0.008366 | 0.015067 |
| C16orf81  | -0.188172913 | 1.72E-05 | 4.97E-05 |
| C16orf82  | -0.015906292 | 0.71876  | 0.771442 |
| C16orf86  | -0.327589256 | 2.39E-14 | 2.66E-13 |
| C16orf87  | 0.282617369  | 6.51E-11 | 4.30E-10 |
| C16orf88  | 0.307537147  | 9.62E-13 | 8.45E-12 |
| C16orf89  | -0.430237942 | 1.28E-24 | 6.64E-23 |
| C16orf90  | 0.037770381  | 0.392347 | 0.467257 |
| C16orf91  | 0.159357304  | 0.000283 | 0.000664 |
| C16orf92  | -0.000102985 | 0.99814  | 0.998889 |
| C16orf93  | -0.319050029 | 1.19E-13 | 1.20E-12 |
| C17orf100 | 0.028278015  | 0.521978 | 0.59394  |
| C17orf101 | -0.129381743 | 0.003268 | 0.006336 |
| C17orf102 | -0.170554223 | 0.0001   | 0.000255 |
| C17orf103 | -0.451304084 | 3.30E-27 | 2.51E-25 |
| C17orf104 | 0.116860194  | 0.007939 | 0.014369 |
| C17orf105 | -0.10614269  | 0.015965 | 0.027138 |
| C17orf106 | 0.003254919  | 0.94126  | 0.953617 |
| C17orf107 | -0.185625    | 2.24E-05 | 6.35E-05 |
| C17orf108 | -0.425490898 | 4.63E-24 | 2.24E-22 |
| C17orf28  | -0.156558014 | 0.000362 | 0.000832 |
| C17orf37  | 0.126115646  | 0.00415  | 0.007901 |
| C17orf39  | -0.141822004 | 0.001251 | 0.002617 |
| C17orf42  | 0.215742326  | 7.72E-07 | 2.75E-06 |
| C17orf44  | -0.197728133 | 6.16E-06 | 1.90E-05 |

|          |              |          |          |
|----------|--------------|----------|----------|
| C17orf46 | -0.150848024 | 0.000593 | 0.001313 |
| C17orf47 | -0.240789363 | 3.15E-08 | 1.40E-07 |
| C17orf48 | -0.00876954  | 0.842628 | 0.875433 |
| C17orf49 | 0.057172755  | 0.195195 | 0.256513 |
| C17orf50 | -0.396178173 | 8.41E-21 | 2.47E-19 |
| C17orf51 | 0.062014997  | 0.159939 | 0.215669 |
| C17orf53 | 0.44418036   | 2.60E-26 | 1.76E-24 |
| C17orf54 | -0.20038178  | 4.59E-06 | 1.45E-05 |
| C17orf55 | -0.200831248 | 4.36E-06 | 1.38E-05 |
| C17orf56 | -0.271807953 | 3.57E-10 | 2.12E-09 |
| C17orf57 | -0.199944685 | 4.81E-06 | 1.51E-05 |
| C17orf58 | 0.277082705  | 1.57E-10 | 9.80E-10 |
| C17orf59 | -0.120205049 | 0.006311 | 0.011631 |
| C17orf60 | -0.14061664  | 0.001378 | 0.002858 |
| C17orf61 | 0.188989455  | 1.58E-05 | 4.59E-05 |
| C17orf62 | -0.014903234 | 0.735812 | 0.786072 |
| C17orf63 | 0.058663561  | 0.183783 | 0.243436 |
| C17orf64 | 0.076978434  | 0.080939 | 0.117856 |
| C17orf65 | -0.324396531 | 4.39E-14 | 4.71E-13 |
| C17orf66 | -0.157103391 | 0.000345 | 0.000796 |
| C17orf67 | -0.013210998 | 0.764872 | 0.810747 |
| C17orf68 | -0.24180966  | 2.75E-08 | 1.23E-07 |
| C17orf69 | -0.260553365 | 1.94E-09 | 1.03E-08 |
| C17orf70 | -0.143562395 | 0.001087 | 0.002298 |
| C17orf71 | 0.196970333  | 6.69E-06 | 2.06E-05 |
| C17orf72 | -0.290643473 | 1.75E-11 | 1.26E-10 |
| C17orf73 | 0.086016696  | 0.051069 | 0.077974 |
| C17orf74 | 0.014638974  | 0.740326 | 0.789839 |
| C17orf75 | 0.218452448  | 5.56E-07 | 2.04E-06 |
| C17orf76 | -0.130496463 | 0.003008 | 0.005872 |
| C17orf77 | 0.060416092  | 0.171006 | 0.228756 |
| C17orf78 | 0.033139257  | 0.452997 | 0.527252 |
| C17orf79 | 0.181470248  | 3.43E-05 | 9.42E-05 |
| C17orf80 | 0.147956897  | 0.000757 | 0.001646 |
| C17orf81 | 0.148448268  | 0.000726 | 0.001586 |
| C17orf82 | -0.110994675 | 0.011717 | 0.020482 |
| C17orf85 | 0.03780606   | 0.3919   | 0.466795 |
| C17orf86 | -0.189581169 | 1.48E-05 | 4.33E-05 |
| C17orf87 | -0.1901986   | 1.39E-05 | 4.07E-05 |
| C17orf88 | -0.122217214 | 0.005482 | 0.010229 |
| C17orf89 | 0.14529634   | 0.000944 | 0.002014 |
| C17orf90 | -0.029009768 | 0.511261 | 0.583515 |
| C17orf91 | -0.188984682 | 1.58E-05 | 4.59E-05 |
| C17orf93 | 0.12897649   | 0.003367 | 0.006515 |

|          |              |          |          |
|----------|--------------|----------|----------|
| C17orf95 | 0.056124087  | 0.203527 | 0.26615  |
| C17orf96 | 0.248231534  | 1.14E-08 | 5.38E-08 |
| C17orf97 | -0.131449259 | 0.002801 | 0.005498 |
| C17orf98 | -0.025112573 | 0.569628 | 0.637855 |
| C17orf99 | -0.095158545 | 0.030839 | 0.049356 |
| C18orf10 | -0.047978626 | 0.27713  | 0.347634 |
| C18orf16 | -0.306753625 | 1.11E-12 | 9.63E-12 |
| C18orf18 | -0.157851255 | 0.000323 | 0.00075  |
| C18orf19 | 0.337900373  | 3.21E-15 | 4.12E-14 |
| C18orf1  | -0.389438851 | 4.26E-20 | 1.13E-18 |
| C18orf20 | -0.094216359 | 0.032543 | 0.05181  |
| C18orf21 | 0.158375976  | 0.000308 | 0.000719 |
| C18orf22 | 0.080652944  | 0.067424 | 0.100116 |
| C18orf25 | 0.039797462  | 0.367423 | 0.442067 |
| C18orf26 | 0.007729169  | 0.861096 | 0.890777 |
| C18orf2  | 0.169083197  | 0.000115 | 0.000291 |
| C18orf32 | 0.159421192  | 0.000281 | 0.00066  |
| C18orf34 | -0.099254959 | 0.024288 | 0.039743 |
| C18orf45 | 0.025322543  | 0.566404 | 0.635092 |
| C18orf54 | 0.318817333  | 1.25E-13 | 1.25E-12 |
| C18orf55 | 0.239053149  | 3.98E-08 | 1.74E-07 |
| C18orf56 | 0.245983982  | 1.55E-08 | 7.21E-08 |
| C18orf62 | 0.110828776  | 0.011844 | 0.020674 |
| C18orf8  | -0.039425359 | 0.371923 | 0.446782 |
| C19orf10 | 0.248470675  | 1.10E-08 | 5.22E-08 |
| C19orf12 | 0.08842134   | 0.044893 | 0.069383 |
| C19orf18 | -0.200015463 | 4.78E-06 | 1.50E-05 |
| C19orf20 | -0.038287494 | 0.385894 | 0.46063  |
| C19orf21 | 0.168047448  | 0.000127 | 0.000319 |
| C19orf22 | 0.067509349  | 0.126003 | 0.1745   |
| C19orf23 | 0.004768921  | 0.914026 | 0.932786 |
| C19orf24 | 0.026127014  | 0.554134 | 0.623791 |
| C19orf25 | -0.103233978 | 0.019113 | 0.03198  |
| C19orf26 | 0.115777786  | 0.008541 | 0.015341 |
| C19orf28 | 0.173234499  | 7.76E-05 | 0.000201 |
| C19orf29 | -0.129717345 | 0.003187 | 0.006194 |
| C19orf2  | 0.130730533  | 0.002956 | 0.005781 |
| C19orf30 | 0.002989457  | 0.946043 | 0.957395 |
| C19orf33 | 0.069684564  | 0.114228 | 0.160145 |
| C19orf34 | -0.183402197 | 2.82E-05 | 7.84E-05 |
| C19orf35 | -0.242143445 | 2.62E-08 | 1.18E-07 |
| C19orf36 | -0.260953985 | 1.83E-09 | 9.74E-09 |
| C19orf38 | -0.096525017 | 0.028503 | 0.045978 |
| C19orf39 | -0.134870773 | 0.00216  | 0.004331 |

|           |              |          |          |
|-----------|--------------|----------|----------|
| C19orf40  | 0.301925595  | 2.58E-12 | 2.10E-11 |
| C19orf41  | 0.036385707  | 0.409945 | 0.484622 |
| C19orf42  | -0.054305066 | 0.218588 | 0.283048 |
| C19orf43  | 0.044917662  | 0.308972 | 0.380866 |
| C19orf44  | -0.270673172 | 4.25E-10 | 2.50E-09 |
| C19orf45  | 0.165858655  | 0.000156 | 0.000385 |
| C19orf46  | -0.144958177 | 0.00097  | 0.002068 |
| C19orf47  | 0.138396189  | 0.001643 | 0.003359 |
| C19orf48  | 0.391663407  | 2.50E-20 | 6.89E-19 |
| C19orf50  | 0.064339197  | 0.144826 | 0.197718 |
| C19orf51  | -0.148135175 | 0.000746 | 0.001625 |
| C19orf52  | 0.11791272   | 0.007391 | 0.013455 |
| C19orf53  | 0.132463728  | 0.002595 | 0.005125 |
| C19orf54  | -0.083899933 | 0.057077 | 0.086141 |
| C19orf55  | -0.048109164 | 0.275824 | 0.346239 |
| C19orf56  | -0.077950558 | 0.077166 | 0.112988 |
| C19orf57  | -0.057997242 | 0.188821 | 0.249267 |
| C19orf59  | -0.179426207 | 4.22E-05 | 0.000114 |
| C19orf60  | -0.079558699 | 0.07124  | 0.105165 |
| C19orf61  | 0.024875196  | 0.573283 | 0.641301 |
| C19orf62  | 0.055160682  | 0.211407 | 0.275033 |
| C19orf63  | -0.045662179 | 0.301014 | 0.372595 |
| C19orf66  | -0.334661704 | 6.08E-15 | 7.46E-14 |
| C19orf69  | -0.138827647 | 0.001588 | 0.003255 |
| C19orf6   | -0.215796051 | 7.67E-07 | 2.74E-06 |
| C19orf70  | 0.039209593  | 0.374548 | 0.449422 |
| C19orf71  | -0.207733708 | 1.99E-06 | 6.64E-06 |
| C19orf73  | -0.023940798 | 0.587777 | 0.654275 |
| C19orf75  | -0.050526055 | 0.25239  | 0.320606 |
| C19orf76  | -0.147853879 | 0.000763 | 0.001659 |
| C19orf77  | 0.127334845  | 0.003798 | 0.007277 |
| C1D       | 0.204462899  | 2.89E-06 | 9.42E-06 |
| C1GALT1C1 | 0.189110944  | 1.56E-05 | 4.54E-05 |
| C1GALT1   | 0.015679687  | 0.7226   | 0.774732 |
| C1QA      | -0.105181023 | 0.016951 | 0.028663 |
| C1QBP     | 0.405591517  | 8.19E-22 | 2.81E-20 |
| C1QB      | -0.089784361 | 0.041681 | 0.064874 |
| C1QC      | -0.070213391 | 0.1115   | 0.15665  |
| C1QL1     | 0.049942316  | 0.257919 | 0.326656 |
| C1QL2     | -0.221669054 | 3.74E-07 | 1.41E-06 |
| C1QL3     | -0.056906213 | 0.197289 | 0.258958 |
| C1QL4     | 0.179246303  | 4.29E-05 | 0.000116 |
| C1QTNF1   | -0.077159534 | 0.080225 | 0.116961 |
| C1QTNF2   | -0.323695224 | 5.01E-14 | 5.31E-13 |

|          |              |          |          |
|----------|--------------|----------|----------|
| C1QTNF3  | -0.188800063 | 1.61E-05 | 4.67E-05 |
| C1QTNF4  | -0.189635851 | 1.47E-05 | 4.31E-05 |
| C1QTNF6  | 0.224495341  | 2.63E-07 | 1.01E-06 |
| C1QTNF7  | -0.48464741  | 1.08E-31 | 1.64E-29 |
| C1QTNF8  | -0.143955385 | 0.001053 | 0.002229 |
| C1QTNF9B | -0.209880986 | 1.55E-06 | 5.26E-06 |
| C1QTNF9  | -0.156660762 | 0.000359 | 0.000825 |
| C1RL     | -0.025238396 | 0.567695 | 0.636226 |
| C1R      | -0.081096496 | 0.065925 | 0.098124 |
| C1S      | -0.011541474 | 0.793869 | 0.834922 |
| C1orf100 | -0.008001198 | 0.856259 | 0.886691 |
| C1orf101 | -0.417544324 | 3.81E-23 | 1.60E-21 |
| C1orf103 | 0.271500063  | 3.74E-10 | 2.21E-09 |
| C1orf104 | -0.234575079 | 7.21E-08 | 3.03E-07 |
| C1orf105 | 0.193389218  | 9.88E-06 | 2.96E-05 |
| C1orf106 | -0.03774685  | 0.392642 | 0.467512 |
| C1orf107 | 0.171663241  | 9.03E-05 | 0.000231 |
| C1orf109 | 0.199610446  | 5.00E-06 | 1.57E-05 |
| C1orf110 | -0.158371074 | 0.000308 | 0.000719 |
| C1orf111 | -0.14656426  | 0.00085  | 0.00183  |
| C1orf112 | 0.384820383  | 1.27E-19 | 3.16E-18 |
| C1orf113 | -0.180571924 | 3.76E-05 | 0.000102 |
| C1orf114 | -0.057484601 | 0.192766 | 0.253771 |
| C1orf115 | -0.140297933 | 0.001413 | 0.002925 |
| C1orf116 | -0.416156496 | 5.48E-23 | 2.24E-21 |
| C1orf122 | 0.118010007  | 0.007342 | 0.013374 |
| C1orf123 | -0.08153003  | 0.064488 | 0.096146 |
| C1orf124 | 0.284950174  | 4.46E-11 | 3.02E-10 |
| C1orf125 | -0.070032013 | 0.11243  | 0.15789  |
| C1orf126 | -0.249270832 | 9.82E-09 | 4.71E-08 |
| C1orf127 | -0.321523236 | 7.53E-14 | 7.78E-13 |
| C1orf128 | -0.145992238 | 0.000891 | 0.001911 |
| C1orf129 | -0.230248787 | 1.27E-07 | 5.14E-07 |
| C1orf130 | -0.308355526 | 8.32E-13 | 7.38E-12 |
| C1orf131 | 0.254809243  | 4.48E-09 | 2.24E-08 |
| C1orf133 | -0.34203813  | 1.40E-15 | 1.90E-14 |
| C1orf135 | 0.493301803  | 6.14E-33 | 1.15E-30 |
| C1orf141 | -0.203521287 | 3.22E-06 | 1.04E-05 |
| C1orf144 | 0.113744991  | 0.009783 | 0.017408 |
| C1orf146 | -0.106303522 | 0.015805 | 0.026897 |
| C1orf14  | -0.00011965  | 0.997839 | 0.998638 |
| C1orf150 | -0.288003849 | 2.71E-11 | 1.89E-10 |
| C1orf151 | 0.12501397   | 0.004493 | 0.008509 |
| C1orf152 | -0.381441058 | 2.79E-19 | 6.63E-18 |

|          |              |          |          |
|----------|--------------|----------|----------|
| C1orf156 | 0.065947262  | 0.135026 | 0.185836 |
| C1orf157 | 0.063352881  | 0.151101 | 0.205163 |
| C1orf158 | -0.242227811 | 2.59E-08 | 1.17E-07 |
| C1orf159 | -0.06654946  | 0.131491 | 0.18137  |
| C1orf161 | -0.020518889 | 0.642243 | 0.703036 |
| C1orf162 | -0.236544236 | 5.56E-08 | 2.38E-07 |
| C1orf163 | 0.442947855  | 3.69E-26 | 2.43E-24 |
| C1orf168 | -0.251287358 | 7.39E-09 | 3.61E-08 |
| C1orf170 | -0.122753961 | 0.005279 | 0.009875 |
| C1orf172 | -0.068907317 | 0.118332 | 0.165123 |
| C1orf173 | -0.252122673 | 6.57E-09 | 3.22E-08 |
| C1orf174 | 0.18009337   | 3.94E-05 | 0.000107 |
| C1orf175 | -0.421333187 | 1.40E-23 | 6.30E-22 |
| C1orf177 | -0.077360791 | 0.079438 | 0.11594  |
| C1orf180 | 0.102858765  | 0.019556 | 0.032658 |
| C1orf182 | 0.258353203  | 2.68E-09 | 1.39E-08 |
| C1orf183 | -0.343045157 | 1.14E-15 | 1.57E-14 |
| C1orf185 | -0.074528196 | 0.091113 | 0.130906 |
| C1orf186 | -0.413077056 | 1.22E-22 | 4.71E-21 |
| C1orf187 | 0.083429526  | 0.058489 | 0.088066 |
| C1orf189 | -0.189331351 | 1.52E-05 | 4.44E-05 |
| C1orf190 | -0.3149909   | 2.52E-13 | 2.41E-12 |
| C1orf192 | -0.216894698 | 6.71E-07 | 2.42E-06 |
| C1orf194 | -0.203306321 | 3.30E-06 | 1.06E-05 |
| C1orf198 | -0.303909271 | 1.82E-12 | 1.53E-11 |
| C1orf200 | -0.172361449 | 8.44E-05 | 0.000217 |
| C1orf201 | -0.21499607  | 8.44E-07 | 3.00E-06 |
| C1orf203 | -0.188006054 | 1.75E-05 | 5.06E-05 |
| C1orf204 | -0.319322964 | 1.13E-13 | 1.14E-12 |
| C1orf210 | -0.209167036 | 1.68E-06 | 5.69E-06 |
| C1orf212 | 0.181622559  | 3.38E-05 | 9.28E-05 |
| C1orf213 | -0.263637769 | 1.23E-09 | 6.73E-09 |
| C1orf216 | -0.063271676 | 0.151626 | 0.205737 |
| C1orf21  | -0.415275669 | 6.89E-23 | 2.77E-21 |
| C1orf220 | -0.082361262 | 0.061803 | 0.092602 |
| C1orf223 | -0.150192264 | 0.000627 | 0.001383 |
| C1orf226 | -0.110251388 | 0.012295 | 0.021402 |
| C1orf227 | -0.086203622 | 0.050564 | 0.077316 |
| C1orf228 | -0.275180768 | 2.12E-10 | 1.30E-09 |
| C1orf229 | -0.147491148 | 0.000787 | 0.001705 |
| C1orf230 | -0.176067059 | 5.89E-05 | 0.000155 |
| C1orf25  | 0.038717663  | 0.380575 | 0.455178 |
| C1orf26  | 0.0323577    | 0.463729 | 0.537596 |
| C1orf27  | 0.099983486  | 0.023259 | 0.038237 |



|           |              |          |          |
|-----------|--------------|----------|----------|
| C1orf31   | 0.398904433  | 4.32E-21 | 1.33E-19 |
| C1orf35   | -0.036538696 | 0.407978 | 0.482696 |
| C1orf38   | -0.148008951 | 0.000754 | 0.00164  |
| C1orf43   | 0.260677155  | 1.91E-09 | 1.01E-08 |
| C1orf49   | -0.031174288 | 0.480244 | 0.554094 |
| C1orf50   | -0.025097117 | 0.569865 | 0.63805  |
| C1orf51   | -0.080568258 | 0.067713 | 0.100484 |
| C1orf52   | 0.076313449  | 0.083605 | 0.121216 |
| C1orf53   | -0.094073865 | 0.032808 | 0.052186 |
| C1orf54   | -0.092860333 | 0.035138 | 0.055542 |
| C1orf55   | 0.166437334  | 0.000148 | 0.000367 |
| C1orf56   | 0.022357632  | 0.612712 | 0.676699 |
| C1orf57   | 0.116325026  | 0.008232 | 0.014849 |
| C1orf58   | 0.126187353  | 0.004129 | 0.007864 |
| C1orf59   | 0.025570788  | 0.562604 | 0.631866 |
| C1orf61   | 0.218725212  | 5.37E-07 | 1.97E-06 |
| C1orf63   | -0.335895969 | 4.77E-15 | 5.94E-14 |
| C1orf64   | 0.048046329  | 0.276452 | 0.346941 |
| C1orf65   | -0.084718242 | 0.054688 | 0.082955 |
| C1orf66   | -0.10775759  | 0.014421 | 0.024768 |
| C1orf68   | 0.044718919  | 0.31112  | 0.383136 |
| C1orf69   | -0.131831114 | 0.002722 | 0.005357 |
| C1orf70   | -0.219588068 | 4.84E-07 | 1.79E-06 |
| C1orf74   | 0.292169512  | 1.36E-11 | 9.97E-11 |
| C1orf77   | 0.022562934  | 0.609452 | 0.673843 |
| C1orf83   | -0.004577551 | 0.917464 | 0.935196 |
| C1orf84   | -0.083792746 | 0.057396 | 0.08659  |
| C1orf85   | 0.172805007  | 8.09E-05 | 0.000208 |
| C1orf86   | -0.049643179 | 0.260784 | 0.329596 |
| C1orf87   | -0.231265513 | 1.11E-07 | 4.55E-07 |
| C1orf88   | -0.335886191 | 4.78E-15 | 5.95E-14 |
| C1orf89   | -0.23817848  | 4.48E-08 | 1.94E-07 |
| C1orf91   | -0.108827572 | 0.013472 | 0.023264 |
| C1orf92   | -0.261143607 | 1.78E-09 | 9.49E-09 |
| C1orf93   | -0.157765909 | 0.000326 | 0.000755 |
| C1orf94   | 0.088576293  | 0.044518 | 0.068845 |
| C1orf95   | -0.029794563 | 0.499896 | 0.572899 |
| C1orf96   | 0.140696363  | 0.001369 | 0.002841 |
| C1orf97   | 0.008361583  | 0.84986  | 0.881389 |
| C1orf9    | 0.140504815  | 0.00139  | 0.002881 |
| C20orf103 | -0.202125338 | 3.77E-06 | 1.21E-05 |
| C20orf106 | -0.126486589 | 0.00404  | 0.007708 |
| C20orf107 | -0.177555173 | 5.08E-05 | 0.000136 |
| C20orf108 | -0.257475375 | 3.05E-09 | 1.56E-08 |

|           |              |          |          |
|-----------|--------------|----------|----------|
| C20orf111 | 0.221886812  | 3.64E-07 | 1.37E-06 |
| C20orf112 | -0.159038153 | 0.000291 | 0.000681 |
| C20orf114 | -0.104993778 | 0.017149 | 0.028963 |
| C20orf117 | -0.070616517 | 0.109455 | 0.154113 |
| C20orf118 | -0.077755771 | 0.07791  | 0.113927 |
| C20orf11  | 0.103938514  | 0.018304 | 0.03075  |
| C20orf123 | -0.145963277 | 0.000893 | 0.001914 |
| C20orf12  | -0.277662874 | 1.43E-10 | 9.02E-10 |
| C20orf132 | -0.33049148  | 1.37E-14 | 1.58E-13 |
| C20orf134 | -0.126166377 | 0.004135 | 0.007875 |
| C20orf135 | -0.177631558 | 5.04E-05 | 0.000135 |
| C20orf141 | 0.302644616  | 2.27E-12 | 1.87E-11 |
| C20orf144 | -0.048658885 | 0.270368 | 0.340245 |
| C20orf151 | -0.192887523 | 1.04E-05 | 3.11E-05 |
| C20orf152 | -0.058315578 | 0.186401 | 0.246464 |
| C20orf160 | -0.32473946  | 4.11E-14 | 4.43E-13 |
| C20orf165 | -0.118882291 | 0.006915 | 0.012648 |
| C20orf166 | -0.082418528 | 0.061621 | 0.092365 |
| C20orf173 | -0.008212948 | 0.852498 | 0.883437 |
| C20orf177 | 0.037269891  | 0.398655 | 0.473318 |
| C20orf185 | -0.017426249 | 0.693187 | 0.749144 |
| C20orf186 | 0.083607144  | 0.057952 | 0.087317 |
| C20orf191 | 0.112137214  | 0.010876 | 0.019165 |
| C20orf194 | -0.435098136 | 3.36E-25 | 1.94E-23 |
| C20orf195 | -0.13463809  | 0.002199 | 0.004403 |
| C20orf196 | 0.061545858  | 0.163129 | 0.219407 |
| C20orf197 | -0.125184477 | 0.004439 | 0.00841  |
| C20orf199 | 0.255900186  | 3.83E-09 | 1.94E-08 |
| C20orf200 | -0.32309324  | 5.61E-14 | 5.88E-13 |
| C20orf201 | -0.102425603 | 0.020079 | 0.033447 |
| C20orf202 | -0.102717043 | 0.019726 | 0.032921 |
| C20orf203 | -0.119829107 | 0.006478 | 0.011911 |
| C20orf20  | 0.323384943  | 5.31E-14 | 5.60E-13 |
| C20orf24  | 0.425514879  | 4.60E-24 | 2.23E-22 |
| C20orf26  | -0.200701266 | 4.42E-06 | 1.40E-05 |
| C20orf27  | 0.113151923  | 0.010174 | 0.018037 |
| C20orf29  | 0.028414975  | 0.519964 | 0.592191 |
| C20orf30  | 0.153717817  | 0.000464 | 0.001046 |
| C20orf3   | 0.005435377  | 0.902068 | 0.923412 |
| C20orf43  | 0.046462191  | 0.292615 | 0.363867 |
| C20orf46  | -0.116934679 | 0.007899 | 0.014301 |
| C20orf4   | -0.001159791 | 0.979053 | 0.98457  |
| C20orf54  | -0.0801755   | 0.069067 | 0.102291 |
| C20orf56  | -0.319117321 | 1.18E-13 | 1.18E-12 |

|           |              |          |          |
|-----------|--------------|----------|----------|
| C20orf70  | 0.108778744  | 0.013514 | 0.023331 |
| C20orf71  | 0.013822438  | 0.754331 | 0.801785 |
| C20orf72  | 0.16270531   | 0.000209 | 0.000504 |
| C20orf7   | 0.216854808  | 6.75E-07 | 2.43E-06 |
| C20orf85  | -0.202095368 | 3.78E-06 | 1.21E-05 |
| C20orf94  | -0.003531119 | 0.936285 | 0.949973 |
| C20orf96  | -0.197292753 | 6.46E-06 | 1.99E-05 |
| C21orf119 | -0.006476202 | 0.883438 | 0.908622 |
| C21orf121 | -0.135298901 | 0.00209  | 0.004204 |
| C21orf122 | -0.22638156  | 2.07E-07 | 8.13E-07 |
| C21orf125 | 0.190792842  | 1.30E-05 | 3.84E-05 |
| C21orf128 | -0.118616854 | 0.007043 | 0.012865 |
| C21orf129 | -0.183686139 | 2.74E-05 | 7.64E-05 |
| C21orf130 | -0.1111391   | 0.011608 | 0.020317 |
| C21orf131 | 0.011268629  | 0.798636 | 0.838929 |
| C21orf15  | -0.284247899 | 5.00E-11 | 3.35E-10 |
| C21orf29  | -0.263809957 | 1.20E-09 | 6.58E-09 |
| C21orf2   | -0.48093502  | 3.62E-31 | 4.92E-29 |
| C21orf33  | -0.138496135 | 0.00163  | 0.003335 |
| C21orf34  | -0.355289505 | 9.09E-17 | 1.45E-15 |
| C21orf45  | 0.37708128   | 7.59E-19 | 1.68E-17 |
| C21orf49  | -0.269397195 | 5.17E-10 | 2.99E-09 |
| C21orf54  | -0.015204511 | 0.730676 | 0.781797 |
| C21orf56  | 0.018060064  | 0.682624 | 0.739527 |
| C21orf57  | 0.017525988  | 0.691521 | 0.747667 |
| C21orf58  | -0.192562028 | 1.08E-05 | 3.22E-05 |
| C21orf59  | -0.00866466  | 0.844486 | 0.876862 |
| C21orf62  | -0.287134452 | 3.12E-11 | 2.17E-10 |
| C21orf63  | -0.273447064 | 2.77E-10 | 1.67E-09 |
| C21orf67  | -0.215476613 | 7.97E-07 | 2.84E-06 |
| C21orf70  | 0.09881161   | 0.024933 | 0.040713 |
| C21orf71  | -0.166855679 | 0.000142 | 0.000353 |
| C21orf7   | -0.077272366 | 0.079783 | 0.116376 |
| C21orf81  | -0.195697813 | 7.69E-06 | 2.34E-05 |
| C21orf82  | -0.178673295 | 4.55E-05 | 0.000122 |
| C21orf84  | 0.146401895  | 0.000861 | 0.001852 |
| C21orf88  | -0.00038008  | 0.993135 | 0.994906 |
| C21orf90  | -0.1769668   | 5.39E-05 | 0.000143 |
| C21orf91  | -0.097588635 | 0.026791 | 0.043492 |
| C21orf94  | -0.066870296 | 0.129636 | 0.179084 |
| C21orf96  | -0.171486104 | 9.18E-05 | 0.000235 |
| C21orf99  | 0.047253403  | 0.284465 | 0.355324 |
| C22orf13  | -0.220958085 | 4.09E-07 | 1.53E-06 |
| C22orf15  | -0.236815105 | 5.37E-08 | 2.30E-07 |

|          |              |          |          |
|----------|--------------|----------|----------|
| C22orf23 | -0.168240755 | 0.000125 | 0.000313 |
| C22orf24 | -0.061919795 | 0.160582 | 0.21642  |
| C22orf25 | -0.216134272 | 7.36E-07 | 2.64E-06 |
| C22orf26 | -0.1251168   | 0.00446  | 0.008449 |
| C22orf27 | 0.001025078  | 0.981486 | 0.98622  |
| C22orf28 | 0.137667675  | 0.001739 | 0.003542 |
| C22orf29 | -0.265914688 | 8.75E-10 | 4.91E-09 |
| C22orf30 | -0.079450334 | 0.071627 | 0.105706 |
| C22orf31 | -0.125616354 | 0.004303 | 0.008171 |
| C22orf32 | -0.132655492 | 0.002557 | 0.005059 |
| C22orf33 | -0.114793519 | 0.009124 | 0.016309 |
| C22orf34 | -0.165653226 | 0.000159 | 0.000392 |
| C22orf36 | -0.383683525 | 1.65E-19 | 4.06E-18 |
| C22orf39 | -0.16104509  | 0.000243 | 0.000577 |
| C22orf40 | -0.182487491 | 3.10E-05 | 8.56E-05 |
| C22orf41 | -0.042004635 | 0.341432 | 0.415623 |
| C22orf42 | -0.089735452 | 0.041792 | 0.065033 |
| C22orf43 | -0.153616378 | 0.000468 | 0.001054 |
| C22orf45 | -0.270555791 | 4.33E-10 | 2.54E-09 |
| C22orf46 | -0.234909226 | 6.90E-08 | 2.91E-07 |
| C22orf9  | -0.037287634 | 0.39843  | 0.473079 |
| C2CD2L   | -0.293674914 | 1.05E-11 | 7.86E-11 |
| C2CD2    | -0.255852705 | 3.85E-09 | 1.95E-08 |
| C2CD3    | -0.060522418 | 0.170253 | 0.227903 |
| C2CD4A   | 0.127021174  | 0.003886 | 0.007435 |
| C2CD4B   | -0.142410787 | 0.001193 | 0.002503 |
| C2CD4C   | -0.190723667 | 1.31E-05 | 3.87E-05 |
| C2CD4D   | 0.105549637  | 0.016567 | 0.028072 |
| C2orf14  | 0.012057328  | 0.784877 | 0.827171 |
| C2orf15  | 0.027739222  | 0.529942 | 0.601674 |
| C2orf16  | 0.065134032  | 0.139916 | 0.191735 |
| C2orf18  | 0.083269893  | 0.058974 | 0.088744 |
| C2orf24  | -0.216851093 | 6.75E-07 | 2.43E-06 |
| C2orf27A | 0.046032385  | 0.297108 | 0.36849  |
| C2orf28  | 0.129714142  | 0.003188 | 0.006195 |
| C2orf29  | 0.222718097  | 3.29E-07 | 1.25E-06 |
| C2orf34  | -0.182461765 | 3.10E-05 | 8.58E-05 |
| C2orf39  | -0.187537732 | 1.84E-05 | 5.29E-05 |
| C2orf3   | 0.255942031  | 3.80E-09 | 1.92E-08 |
| C2orf40  | -0.386785757 | 7.99E-20 | 2.03E-18 |
| C2orf42  | -0.144638416 | 0.000996 | 0.002119 |
| C2orf43  | 0.232922155  | 8.96E-08 | 3.72E-07 |
| C2orf44  | 0.167470332  | 0.000134 | 0.000335 |
| C2orf47  | 0.355828885  | 8.11E-17 | 1.32E-15 |

|         |              |          |          |
|---------|--------------|----------|----------|
| C2orf48 | 0.081729805  | 0.063834 | 0.095295 |
| C2orf49 | 0.407294476  | 5.33E-22 | 1.87E-20 |
| C2orf50 | -0.137170157 | 0.001808 | 0.003672 |
| C2orf51 | 0.110849883  | 0.011828 | 0.02065  |
| C2orf52 | -0.05451693  | 0.216794 | 0.281144 |
| C2orf53 | -0.005561237 | 0.899812 | 0.921763 |
| C2orf54 | -0.277665002 | 1.43E-10 | 9.02E-10 |
| C2orf55 | -0.285469568 | 4.10E-11 | 2.79E-10 |
| C2orf56 | 0.020740122  | 0.638659 | 0.699825 |
| C2orf57 | -0.153195892 | 0.000485 | 0.00109  |
| C2orf58 | -0.391430967 | 2.65E-20 | 7.25E-19 |
| C2orf60 | 0.0371011    | 0.400795 | 0.47538  |
| C2orf61 | -0.044814192 | 0.310089 | 0.382125 |
| C2orf62 | -0.22304316  | 3.16E-07 | 1.20E-06 |
| C2orf63 | -0.342716304 | 1.22E-15 | 1.67E-14 |
| C2orf64 | 0.038324287  | 0.385437 | 0.460139 |
| C2orf65 | -0.171574058 | 9.11E-05 | 0.000233 |
| C2orf66 | -0.208885548 | 1.74E-06 | 5.87E-06 |
| C2orf67 | -0.222109002 | 3.54E-07 | 1.34E-06 |
| C2orf68 | -0.159845994 | 0.00027  | 0.000638 |
| C2orf69 | 0.278326699  | 1.29E-10 | 8.17E-10 |
| C2orf70 | -0.03117031  | 0.4803   | 0.554104 |
| C2orf71 | -0.20495441  | 2.74E-06 | 8.93E-06 |
| C2orf72 | -0.029834103 | 0.499327 | 0.572312 |
| C2orf73 | -0.272467939 | 3.22E-10 | 1.92E-09 |
| C2orf74 | -0.153133702 | 0.000488 | 0.001096 |
| C2orf76 | 0.190478814  | 1.35E-05 | 3.96E-05 |
| C2orf77 | -0.201157536 | 4.20E-06 | 1.33E-05 |
| C2orf78 | 0.156608136  | 0.000361 | 0.000829 |
| C2orf79 | 0.069547903  | 0.114941 | 0.161055 |
| C2orf7  | 0.096539407  | 0.028479 | 0.045951 |
| C2orf80 | 0.1003865    | 0.022705 | 0.037399 |
| C2orf81 | -0.232991304 | 8.88E-08 | 3.69E-07 |
| C2orf82 | 0.166372044  | 0.000149 | 0.000368 |
| C2orf83 | 0.096975499  | 0.027767 | 0.044907 |
| C2orf84 | 0.052993613  | 0.22993  | 0.295877 |
| C2orf85 | -0.250949754 | 7.75E-09 | 3.77E-08 |
| C2orf86 | -0.207268992 | 2.10E-06 | 6.97E-06 |
| C2orf88 | 0.033113728  | 0.453345 | 0.527596 |
| C2orf89 | -0.195178016 | 8.14E-06 | 2.47E-05 |
| C2      | -0.129510304 | 0.003237 | 0.006283 |
| C3AR1   | -0.112546685 | 0.010588 | 0.018698 |
| C3P1    | 0.176408652  | 5.69E-05 | 0.00015  |
| C3orf10 | 0.07057238   | 0.109677 | 0.154387 |

|         |              |          |          |
|---------|--------------|----------|----------|
| C3orf14 | 0.001726404  | 0.968824 | 0.976445 |
| C3orf15 | -0.345229249 | 7.34E-16 | 1.03E-14 |
| C3orf16 | -0.146019729 | 0.000889 | 0.001907 |
| C3orf17 | 0.13732376   | 0.001786 | 0.003631 |
| C3orf18 | -0.279923753 | 1.00E-10 | 6.45E-10 |
| C3orf19 | -0.154792266 | 0.000423 | 0.00096  |
| C3orf1  | 0.202891751  | 3.46E-06 | 1.11E-05 |
| C3orf20 | 0.003250475  | 0.94134  | 0.953649 |
| C3orf21 | 0.14147509   | 0.001286 | 0.002684 |
| C3orf22 | -0.035817679 | 0.417298 | 0.491976 |
| C3orf23 | 0.033146235  | 0.452902 | 0.527172 |
| C3orf24 | -0.019972061 | 0.651138 | 0.710966 |
| C3orf26 | 0.371239148  | 2.84E-18 | 5.74E-17 |
| C3orf27 | -0.060331504 | 0.171607 | 0.229452 |
| C3orf30 | 0.033243871  | 0.451571 | 0.525899 |
| C3orf31 | -0.084352725 | 0.055745 | 0.084347 |
| C3orf32 | -0.12387728  | 0.004874 | 0.009177 |
| C3orf33 | 0.111049301  | 0.011676 | 0.020422 |
| C3orf34 | -0.069149672 | 0.11704  | 0.163583 |
| C3orf35 | -0.235007307 | 6.82E-08 | 2.88E-07 |
| C3orf36 | -0.208296082 | 1.86E-06 | 6.26E-06 |
| C3orf37 | 0.141423197  | 0.001292 | 0.002694 |
| C3orf38 | 0.191760686  | 1.18E-05 | 3.49E-05 |
| C3orf39 | -0.069765579 | 0.113806 | 0.159621 |
| C3orf42 | -0.353744032 | 1.26E-16 | 1.97E-15 |
| C3orf43 | 0.006816682  | 0.877357 | 0.904182 |
| C3orf45 | -0.05398747  | 0.221297 | 0.286075 |
| C3orf47 | -0.336092521 | 4.59E-15 | 5.73E-14 |
| C3orf48 | -0.188986011 | 1.58E-05 | 4.59E-05 |
| C3orf49 | -0.054519652 | 0.216771 | 0.281144 |
| C3orf50 | -0.159765926 | 0.000272 | 0.000642 |
| C3orf51 | -0.049698167 | 0.260256 | 0.329074 |
| C3orf52 | -0.161351703 | 0.000236 | 0.000563 |
| C3orf54 | -0.229072331 | 1.47E-07 | 5.90E-07 |
| C3orf55 | -0.062223829 | 0.158534 | 0.214006 |
| C3orf57 | -0.002372971 | 0.957158 | 0.967174 |
| C3orf58 | -0.089884678 | 0.041452 | 0.064556 |
| C3orf59 | 0.065423362  | 0.138161 | 0.189655 |
| C3orf62 | -0.42606266  | 3.97E-24 | 1.95E-22 |
| C3orf63 | -0.013862658 | 0.753639 | 0.80122  |
| C3orf64 | -0.099936169 | 0.023324 | 0.03833  |
| C3orf65 | -0.004513529 | 0.918614 | 0.936169 |
| C3orf66 | 0.042709403  | 0.333386 | 0.407118 |
| C3orf67 | 0.117814212  | 0.00744  | 0.013533 |

|         |              |          |          |
|---------|--------------|----------|----------|
| C3orf70 | -0.121344435 | 0.005829 | 0.010809 |
| C3orf71 | -0.216049989 | 7.44E-07 | 2.66E-06 |
| C3orf72 | 0.092318071  | 0.036223 | 0.057104 |
| C3orf74 | -0.042122883 | 0.340073 | 0.414222 |
| C3orf75 | 0.099195348  | 0.024374 | 0.039868 |
| C3orf77 | 0.024807156  | 0.574332 | 0.642009 |
| C3orf79 | -0.02931555  | 0.506817 | 0.579501 |
| C3      | -0.224908054 | 2.50E-07 | 9.66E-07 |
| C4A     | -0.414828444 | 7.74E-23 | 3.08E-21 |
| C4BPA   | -0.293778936 | 1.04E-11 | 7.73E-11 |
| C4BPB   | -0.015799753 | 0.720564 | 0.772964 |
| C4orf10 | -0.181040944 | 3.59E-05 | 9.81E-05 |
| C4orf12 | -0.234071787 | 7.71E-08 | 3.22E-07 |
| C4orf14 | 0.158189694  | 0.000313 | 0.000729 |
| C4orf17 | 0.040260302  | 0.361873 | 0.436414 |
| C4orf19 | -0.231646242 | 1.06E-07 | 4.34E-07 |
| C4orf21 | 0.064114958  | 0.146235 | 0.199341 |
| C4orf22 | -0.158953223 | 0.000293 | 0.000685 |
| C4orf23 | -0.261041762 | 1.81E-09 | 9.63E-09 |
| C4orf26 | 0.21398742   | 9.52E-07 | 3.36E-06 |
| C4orf27 | 0.123643611  | 0.004956 | 0.009318 |
| C4orf29 | 0.002287228  | 0.958704 | 0.968394 |
| C4orf31 | -0.334050808 | 6.85E-15 | 8.31E-14 |
| C4orf32 | 0.062552142  | 0.156345 | 0.211393 |
| C4orf33 | -0.022639242 | 0.608243 | 0.672766 |
| C4orf34 | 0.109542247  | 0.01287  | 0.022314 |
| C4orf35 | 0.034360645  | 0.436509 | 0.51092  |
| C4orf36 | 0.005922495  | 0.893341 | 0.916497 |
| C4orf37 | -0.19158632  | 1.20E-05 | 3.55E-05 |
| C4orf38 | -0.106928178 | 0.015197 | 0.025973 |
| C4orf39 | -0.195519947 | 7.84E-06 | 2.38E-05 |
| C4orf3  | 0.022112017  | 0.616622 | 0.680152 |
| C4orf40 | 0.047556833  | 0.28138  | 0.352043 |
| C4orf41 | -0.0876342   | 0.046842 | 0.072082 |
| C4orf42 | -0.005343532 | 0.903715 | 0.924624 |
| C4orf43 | 0.403292919  | 1.46E-21 | 4.87E-20 |
| C4orf44 | -0.239296134 | 3.86E-08 | 1.69E-07 |
| C4orf45 | -0.049975403 | 0.257603 | 0.326318 |
| C4orf46 | 0.346670137  | 5.47E-16 | 7.88E-15 |
| C4orf47 | -0.096963867 | 0.027786 | 0.04493  |
| C4orf48 | 0.087764722  | 0.046514 | 0.071638 |
| C4orf49 | -0.055921841 | 0.205164 | 0.267974 |
| C4orf50 | 0.000710529  | 0.987166 | 0.990437 |
| C4orf51 | 0.094094973  | 0.032769 | 0.052128 |

|          |              |          |          |
|----------|--------------|----------|----------|
| C4orf52  | 0.211791185  | 1.24E-06 | 4.27E-06 |
| C4orf6   | 0.143965063  | 0.001052 | 0.002228 |
| C4orf7   | -0.212708604 | 1.11E-06 | 3.86E-06 |
| C5AR1    | -0.127145792 | 0.003851 | 0.007371 |
| C5orf13  | -0.035323918 | 0.423752 | 0.498379 |
| C5orf15  | 0.175728224  | 6.09E-05 | 0.00016  |
| C5orf20  | -0.292324139 | 1.32E-11 | 9.73E-11 |
| C5orf22  | 0.180903366  | 3.64E-05 | 9.94E-05 |
| C5orf23  | -0.151810521 | 0.000547 | 0.001217 |
| C5orf24  | 0.100883281  | 0.022039 | 0.036413 |
| C5orf25  | -0.158494397 | 0.000305 | 0.000712 |
| C5orf27  | -0.051643265 | 0.242039 | 0.309288 |
| C5orf28  | 0.218198887  | 5.73E-07 | 2.10E-06 |
| C5orf30  | 0.196255035  | 7.24E-06 | 2.21E-05 |
| C5orf32  | -0.151443847 | 0.000564 | 0.001253 |
| C5orf33  | 0.161792491  | 0.000227 | 0.000543 |
| C5orf34  | 0.290530521  | 1.78E-11 | 1.28E-10 |
| C5orf35  | 0.067968126  | 0.123444 | 0.171479 |
| C5orf36  | -0.025171134 | 0.568728 | 0.637097 |
| C5orf38  | -0.400723887 | 2.76E-21 | 8.77E-20 |
| C5orf39  | -0.169935667 | 0.000106 | 0.00027  |
| C5orf40  | -0.030158733 | 0.494668 | 0.567917 |
| C5orf41  | -0.338384824 | 2.91E-15 | 3.77E-14 |
| C5orf42  | -0.246100281 | 1.53E-08 | 7.10E-08 |
| C5orf43  | 0.291563271  | 1.50E-11 | 1.10E-10 |
| C5orf44  | 0.047876689  | 0.278153 | 0.348704 |
| C5orf45  | -0.354120926 | 1.16E-16 | 1.83E-15 |
| C5orf46  | 0.325803271  | 3.36E-14 | 3.67E-13 |
| C5orf47  | -0.043044472 | 0.329604 | 0.403017 |
| C5orf48  | 0.012747259  | 0.772895 | 0.817431 |
| C5orf49  | -0.30110248  | 2.97E-12 | 2.40E-11 |
| C5orf4   | -0.159223114 | 0.000286 | 0.000671 |
| C5orf51  | 0.023129442  | 0.600498 | 0.665857 |
| C5orf52  | -0.0412164   | 0.350576 | 0.425172 |
| C5orf53  | -0.412646826 | 1.36E-22 | 5.18E-21 |
| C5orf54  | -0.083292636 | 0.058905 | 0.088653 |
| C5orf55  | -0.085245203 | 0.053194 | 0.080895 |
| C5orf56  | -0.287359587 | 3.01E-11 | 2.09E-10 |
| C5orf58  | -0.196330253 | 7.18E-06 | 2.19E-05 |
| C5orf60  | -0.053480236 | 0.225674 | 0.290941 |
| C5orf62  | -0.052433359 | 0.234901 | 0.301361 |
| C5       | -0.047668095 | 0.280255 | 0.350898 |
| C6orf103 | -0.262472302 | 1.46E-09 | 7.91E-09 |
| C6orf105 | -0.058570599 | 0.18448  | 0.244246 |



|          |              |          |          |
|----------|--------------|----------|----------|
| C6orf106 | -0.117413961 | 0.007646 | 0.013878 |
| C6orf108 | 0.076385384  | 0.083313 | 0.120864 |
| C6orf10  | 0.027551724  | 0.532728 | 0.60418  |
| C6orf114 | -0.082197613 | 0.062324 | 0.093307 |
| C6orf115 | 0.230161471  | 1.28E-07 | 5.19E-07 |
| C6orf118 | -0.236971738 | 5.26E-08 | 2.25E-07 |
| C6orf120 | 0.12389989   | 0.004866 | 0.009166 |
| C6orf122 | -0.008802643 | 0.842042 | 0.874917 |
| C6orf123 | -0.305793723 | 1.31E-12 | 1.12E-11 |
| C6orf124 | -0.332527149 | 9.22E-15 | 1.09E-13 |
| C6orf125 | 0.099958668  | 0.023293 | 0.038288 |
| C6orf126 | 0.068102461  | 0.122703 | 0.17065  |
| C6orf127 | 0.069524387  | 0.115064 | 0.161205 |
| C6orf129 | 0.334362145  | 6.45E-15 | 7.88E-14 |
| C6orf130 | 0.047323101  | 0.283755 | 0.354588 |
| C6orf132 | -0.047859983 | 0.278321 | 0.348854 |
| C6orf134 | -0.14161688  | 0.001272 | 0.002656 |
| C6orf136 | 0.080632396  | 0.067494 | 0.100198 |
| C6orf138 | -0.269247364 | 5.29E-10 | 3.06E-09 |
| C6orf141 | -0.036653972 | 0.4065   | 0.481289 |
| C6orf142 | -0.031506275 | 0.475579 | 0.54925  |
| C6orf145 | -0.205191925 | 2.66E-06 | 8.71E-06 |
| C6orf146 | -0.002686057 | 0.951512 | 0.962345 |
| C6orf147 | -0.146056975 | 0.000886 | 0.001902 |
| C6orf150 | 0.293471732  | 1.09E-11 | 8.11E-11 |
| C6orf153 | 0.353544977  | 1.31E-16 | 2.05E-15 |
| C6orf154 | -0.063288755 | 0.151516 | 0.205656 |
| C6orf155 | -0.34270887  | 1.22E-15 | 1.67E-14 |
| C6orf15  | 0.060228798  | 0.172339 | 0.230369 |
| C6orf162 | 0.079942527  | 0.069881 | 0.103337 |
| C6orf163 | -0.192991786 | 1.03E-05 | 3.08E-05 |
| C6orf164 | -0.302345436 | 2.39E-12 | 1.96E-11 |
| C6orf165 | -0.151682328 | 0.000553 | 0.00123  |
| C6orf167 | 0.197015194  | 6.66E-06 | 2.05E-05 |
| C6orf168 | -0.196007733 | 7.43E-06 | 2.27E-05 |
| C6orf170 | -0.17799986  | 4.86E-05 | 0.00013  |
| C6orf174 | -0.277786015 | 1.41E-10 | 8.86E-10 |
| C6orf176 | 0.281429795  | 7.87E-11 | 5.15E-10 |
| C6orf182 | 0.220323513  | 4.42E-07 | 1.65E-06 |
| C6orf186 | -0.113318435 | 0.010063 | 0.017859 |
| C6orf191 | 0.050105631  | 0.256364 | 0.324995 |
| C6orf192 | -0.051000538 | 0.247957 | 0.3158   |
| C6orf195 | 0.132649179  | 0.002559 | 0.005061 |
| C6orf1   | -0.138615888 | 0.001614 | 0.003305 |

|          |              |          |          |
|----------|--------------|----------|----------|
| C6orf201 | -0.312292868 | 4.11E-13 | 3.81E-12 |
| C6orf203 | -0.144809888 | 0.000982 | 0.002091 |
| C6orf204 | -0.098170694 | 0.025893 | 0.042152 |
| C6orf208 | -0.087305726 | 0.047675 | 0.073201 |
| C6orf211 | 0.027555088  | 0.532678 | 0.604163 |
| C6orf217 | -0.267953672 | 6.43E-10 | 3.68E-09 |
| C6orf218 | 0.225496003  | 2.32E-07 | 9.01E-07 |
| C6orf221 | -0.038436732 | 0.384043 | 0.458667 |
| C6orf222 | -0.173555422 | 7.52E-05 | 0.000195 |
| C6orf223 | -0.025372869 | 0.565633 | 0.634484 |
| C6orf225 | -0.168921141 | 0.000117 | 0.000295 |
| C6orf226 | -0.124746524 | 0.00458  | 0.008662 |
| C6orf227 | -0.138941554 | 0.001574 | 0.003227 |
| C6orf25  | -0.174672919 | 6.75E-05 | 0.000176 |
| C6orf26  | -0.129435343 | 0.003255 | 0.006314 |
| C6orf27  | -0.042181871 | 0.339397 | 0.413492 |
| C6orf35  | 0.040990318  | 0.353227 | 0.427845 |
| C6orf41  | -0.271374823 | 3.82E-10 | 2.25E-09 |
| C6orf47  | -0.190752447 | 1.31E-05 | 3.86E-05 |
| C6orf48  | 0.06456179   | 0.143438 | 0.19605  |
| C6orf52  | 0.07662677   | 0.08234  | 0.119643 |
| C6orf57  | 0.107829142  | 0.014356 | 0.024667 |
| C6orf58  | -0.095437393 | 0.030349 | 0.04867  |
| C6orf59  | -0.179576525 | 4.15E-05 | 0.000112 |
| C6orf62  | -0.021932403 | 0.619488 | 0.682749 |
| C6orf64  | -0.076971932 | 0.080965 | 0.117876 |
| C6orf70  | -0.282456132 | 6.68E-11 | 4.41E-10 |
| C6orf72  | -0.030679606 | 0.487242 | 0.560646 |
| C6orf81  | -0.078248196 | 0.07604  | 0.111551 |
| C6orf89  | -0.184314684 | 2.57E-05 | 7.20E-05 |
| C6orf94  | 0.00416671   | 0.924848 | 0.941379 |
| C6orf97  | -0.286332551 | 3.56E-11 | 2.45E-10 |
| C6       | -0.287909835 | 2.75E-11 | 1.92E-10 |
| C7orf10  | 0.10898574   | 0.013337 | 0.023052 |
| C7orf11  | 0.311699572  | 4.57E-13 | 4.20E-12 |
| C7orf13  | -0.010754862 | 0.807633 | 0.846201 |
| C7orf16  | -0.086534665 | 0.049682 | 0.076077 |
| C7orf23  | -0.424903588 | 5.42E-24 | 2.59E-22 |
| C7orf25  | 0.174598307  | 6.80E-05 | 0.000177 |
| C7orf26  | -0.069666316 | 0.114323 | 0.160256 |
| C7orf27  | -0.096498037 | 0.028547 | 0.046043 |
| C7orf28A | 0.197187136  | 6.53E-06 | 2.01E-05 |
| C7orf28B | 0.228748865  | 1.54E-07 | 6.13E-07 |
| C7orf29  | 0.012683536  | 0.773999 | 0.818382 |

|          |              |          |          |
|----------|--------------|----------|----------|
| C7orf30  | 0.136438093  | 0.001914 | 0.00387  |
| C7orf31  | -0.140190793 | 0.001425 | 0.002949 |
| C7orf33  | 0.021474025  | 0.626829 | 0.689508 |
| C7orf34  | -0.091366301 | 0.038197 | 0.059877 |
| C7orf36  | 0.185794204  | 2.20E-05 | 6.25E-05 |
| C7orf40  | 0.132182661  | 0.00265  | 0.00523  |
| C7orf41  | -0.336186408 | 4.50E-15 | 5.64E-14 |
| C7orf42  | -0.038803572 | 0.379518 | 0.454262 |
| C7orf43  | -0.062081814 | 0.159488 | 0.215134 |
| C7orf44  | 0.223420385  | 3.01E-07 | 1.15E-06 |
| C7orf45  | -0.14592063  | 0.000896 | 0.001921 |
| C7orf46  | -0.185473035 | 2.28E-05 | 6.44E-05 |
| C7orf47  | 0.133209607  | 0.002452 | 0.004866 |
| C7orf49  | 0.326566918  | 2.91E-14 | 3.20E-13 |
| C7orf4   | -0.117824965 | 0.007435 | 0.013526 |
| C7orf50  | -0.002031785 | 0.963313 | 0.971772 |
| C7orf51  | 0.000535775  | 0.990323 | 0.992856 |
| C7orf52  | 0.000943975  | 0.98295  | 0.987247 |
| C7orf53  | -0.118851672 | 0.00693  | 0.012673 |
| C7orf54  | -0.176480445 | 5.65E-05 | 0.000149 |
| C7orf55  | -0.018182812 | 0.680585 | 0.737759 |
| C7orf57  | -0.243531386 | 2.17E-08 | 9.87E-08 |
| C7orf58  | -0.248992874 | 1.02E-08 | 4.89E-08 |
| C7orf59  | 0.031523713  | 0.475335 | 0.549079 |
| C7orf60  | -0.066444079 | 0.132104 | 0.182166 |
| C7orf61  | 0.095478879  | 0.030277 | 0.04857  |
| C7orf63  | -0.235360739 | 6.51E-08 | 2.75E-07 |
| C7orf64  | -0.001587891 | 0.971324 | 0.978373 |
| C7orf65  | 0.063343444  | 0.151162 | 0.205232 |
| C7orf66  | 0.043981054  | 0.319179 | 0.391829 |
| C7orf68  | 0.379075467  | 4.81E-19 | 1.10E-17 |
| C7orf69  | -0.00020003  | 0.996387 | 0.997535 |
| C7orf70  | 0.267957572  | 6.43E-10 | 3.68E-09 |
| C7orf71  | -0.009084349 | 0.837057 | 0.870595 |
| C7orf72  | -0.039876768 | 0.366468 | 0.441184 |
| C7       | -0.371056021 | 2.96E-18 | 5.96E-17 |
| C8A      | 0.086075542  | 0.050909 | 0.077755 |
| C8B      | -0.071914547 | 0.103071 | 0.14607  |
| C8G      | 0.063417663  | 0.150682 | 0.204678 |
| C8ORFK29 | -0.038598697 | 0.382041 | 0.456658 |
| C8orf12  | -0.105827644 | 0.016282 | 0.027627 |
| C8orf22  | -0.050456492 | 0.253044 | 0.321378 |
| C8orf30A | 0.175933141  | 5.96E-05 | 0.000157 |
| C8orf31  | -0.053719926 | 0.223598 | 0.288695 |

|          |              |          |          |
|----------|--------------|----------|----------|
| C8orf33  | 0.313165813  | 3.51E-13 | 3.29E-12 |
| C8orf34  | -0.35247172  | 1.64E-16 | 2.54E-15 |
| C8orf37  | 0.084866372  | 0.054265 | 0.08242  |
| C8orf38  | 0.165189356  | 0.000166 | 0.000408 |
| C8orf39  | 0.006910668  | 0.875679 | 0.903012 |
| C8orf40  | -0.002815208 | 0.949184 | 0.960379 |
| C8orf41  | 0.132894887  | 0.002512 | 0.004974 |
| C8orf42  | -0.252813542 | 5.95E-09 | 2.94E-08 |
| C8orf44  | -0.043658095 | 0.322749 | 0.395774 |
| C8orf45  | 0.053303672  | 0.227212 | 0.292661 |
| C8orf46  | -0.183851291 | 2.69E-05 | 7.52E-05 |
| C8orf47  | 0.070492704  | 0.11008  | 0.154851 |
| C8orf48  | -0.225141553 | 2.43E-07 | 9.40E-07 |
| C8orf4   | -0.000549893 | 0.990068 | 0.9927   |
| C8orf51  | 0.067423358  | 0.126488 | 0.175122 |
| C8orf55  | -0.026505664 | 0.548404 | 0.618735 |
| C8orf56  | 0.056336409  | 0.20182  | 0.26428  |
| C8orf58  | -0.118548289 | 0.007076 | 0.012921 |
| C8orf59  | 0.339823915  | 2.19E-15 | 2.88E-14 |
| C8orf71  | 0.052792615  | 0.231705 | 0.297796 |
| C8orf73  | -0.146895216 | 0.000827 | 0.001785 |
| C8orf74  | 0.123551022  | 0.004989 | 0.009374 |
| C8orf75  | 0.198773659  | 5.48E-06 | 1.71E-05 |
| C8orf76  | 0.486718267  | 5.49E-32 | 8.57E-30 |
| C8orf77  | -0.158229987 | 0.000312 | 0.000727 |
| C8orf79  | -0.332818302 | 8.72E-15 | 1.04E-13 |
| C8orf80  | -0.082416428 | 0.061628 | 0.092368 |
| C8orf83  | 0.125360047  | 0.004383 | 0.008313 |
| C8orf84  | -0.237752765 | 4.74E-08 | 2.04E-07 |
| C8orf85  | -0.324801692 | 4.06E-14 | 4.38E-13 |
| C8orf86  | 0.030469084  | 0.490236 | 0.56354  |
| C9orf100 | 0.378226718  | 5.84E-19 | 1.32E-17 |
| C9orf102 | -0.061567705 | 0.162979 | 0.219232 |
| C9orf103 | -0.201241194 | 4.17E-06 | 1.32E-05 |
| C9orf106 | -0.221511115 | 3.82E-07 | 1.43E-06 |
| C9orf109 | 0.039398057  | 0.372255 | 0.447055 |
| C9orf110 | 0.035842146  | 0.41698  | 0.491774 |
| C9orf114 | -0.072138755 | 0.101998 | 0.144697 |
| C9orf116 | -0.072645816 | 0.099606 | 0.141774 |
| C9orf117 | -0.261381866 | 1.72E-09 | 9.19E-09 |
| C9orf119 | 0.154761348  | 0.000424 | 0.000963 |
| C9orf11  | -0.178850618 | 4.47E-05 | 0.00012  |
| C9orf122 | -0.052942371 | 0.230382 | 0.296362 |
| C9orf123 | 0.089672796  | 0.041936 | 0.065236 |

|           |              |          |          |
|-----------|--------------|----------|----------|
| C9orf125  | -0.045328252 | 0.304566 | 0.37634  |
| C9orf128  | -0.36668537  | 7.79E-18 | 1.48E-16 |
| C9orf129  | 0.031644493  | 0.473644 | 0.547395 |
| C9orf130  | -0.209106763 | 1.69E-06 | 5.73E-06 |
| C9orf131  | -0.262631802 | 1.43E-09 | 7.74E-09 |
| C9orf135  | -0.213303714 | 1.03E-06 | 3.62E-06 |
| C9orf139  | -0.338057809 | 3.11E-15 | 4.01E-14 |
| C9orf140  | 0.445414056  | 1.82E-26 | 1.25E-24 |
| C9orf142  | -0.079178116 | 0.072607 | 0.106941 |
| C9orf144B | -0.216960352 | 6.66E-07 | 2.41E-06 |
| C9orf144  | -0.154831434 | 0.000421 | 0.000957 |
| C9orf150  | -0.17363401  | 7.47E-05 | 0.000194 |
| C9orf152  | -0.23937386  | 3.82E-08 | 1.67E-07 |
| C9orf153  | -0.005804559 | 0.895453 | 0.918192 |
| C9orf156  | -0.167997158 | 0.000128 | 0.00032  |
| C9orf163  | -0.13526396  | 0.002096 | 0.004213 |
| C9orf167  | -0.106877355 | 0.015246 | 0.026041 |
| C9orf169  | 0.086197042  | 0.050582 | 0.077338 |
| C9orf16   | -0.029308997 | 0.506912 | 0.579544 |
| C9orf170  | -0.083185311 | 0.059233 | 0.089066 |
| C9orf171  | -0.214274647 | 9.20E-07 | 3.25E-06 |
| C9orf172  | 0.040926741  | 0.353975 | 0.428621 |
| C9orf173  | -0.175414045 | 6.28E-05 | 0.000165 |
| C9orf21   | 0.10894744   | 0.01337  | 0.023107 |
| C9orf23   | 0.21037218   | 1.46E-06 | 4.98E-06 |
| C9orf24   | -0.238849466 | 4.09E-08 | 1.78E-07 |
| C9orf25   | -0.064991017 | 0.14079  | 0.1928   |
| C9orf27   | 0.095052355  | 0.031027 | 0.049629 |
| C9orf30   | 0.463365276  | 8.98E-29 | 8.20E-27 |
| C9orf37   | -0.113724612 | 0.009796 | 0.01743  |
| C9orf3    | -0.059050922 | 0.1809   | 0.240158 |
| C9orf40   | 0.35060697   | 2.43E-16 | 3.64E-15 |
| C9orf41   | 0.214856436  | 8.58E-07 | 3.04E-06 |
| C9orf43   | -0.051967904 | 0.239088 | 0.305908 |
| C9orf44   | -0.21155523  | 1.27E-06 | 4.38E-06 |
| C9orf45   | -0.405050549 | 9.38E-22 | 3.20E-20 |
| C9orf46   | 0.218515715  | 5.51E-07 | 2.02E-06 |
| C9orf47   | -0.080102325 | 0.069322 | 0.102638 |
| C9orf4    | 0.051739438  | 0.241162 | 0.308305 |
| C9orf50   | -0.199497099 | 5.06E-06 | 1.59E-05 |
| C9orf53   | 0.016872824  | 0.70246  | 0.757773 |
| C9orf57   | 0.027697183  | 0.530566 | 0.60211  |
| C9orf5    | -0.166329634 | 0.00015  | 0.00037  |
| C9orf64   | 0.107034144  | 0.015096 | 0.025827 |

|         |              |          |          |
|---------|--------------|----------|----------|
| C9orf66 | -0.285673453 | 3.97E-11 | 2.71E-10 |
| C9orf68 | -0.337477775 | 3.49E-15 | 4.45E-14 |
| C9orf69 | 0.137917258  | 0.001705 | 0.00348  |
| C9orf6  | 0.098714921  | 0.025076 | 0.040929 |
| C9orf70 | -0.170799361 | 9.81E-05 | 0.00025  |
| C9orf71 | -0.125868259 | 0.004225 | 0.008032 |
| C9orf72 | -0.147972942 | 0.000756 | 0.001644 |
| C9orf78 | 0.014910612  | 0.735686 | 0.785979 |
| C9orf79 | 0.052510806  | 0.23421  | 0.300667 |
| C9orf7  | -0.282546004 | 6.58E-11 | 4.35E-10 |
| C9orf80 | 0.155829495  | 0.000386 | 0.000883 |
| C9orf82 | 0.165948494  | 0.000155 | 0.000382 |
| C9orf84 | 0.029084465  | 0.510174 | 0.582573 |
| C9orf85 | 0.173321918  | 7.70E-05 | 0.000199 |
| C9orf86 | -0.081415882 | 0.064864 | 0.09666  |
| C9orf89 | 0.023819524  | 0.58967  | 0.655816 |
| C9orf91 | -0.144331722 | 0.001021 | 0.00217  |
| C9orf93 | -0.149124713 | 0.000686 | 0.001505 |
| C9orf95 | -0.121454296 | 0.005784 | 0.010734 |
| C9orf96 | -0.297234023 | 5.77E-12 | 4.47E-11 |
| C9orf98 | -0.234092485 | 7.69E-08 | 3.22E-07 |
| C9orf9  | -0.247689556 | 1.22E-08 | 5.78E-08 |
| C9      | 0.111856883  | 0.011077 | 0.01948  |
| CA10    | -0.334949509 | 5.74E-15 | 7.08E-14 |
| CA11    | -0.131668537 | 0.002755 | 0.005418 |
| CA12    | 0.178975595  | 4.41E-05 | 0.000119 |
| CA13    | -0.265400065 | 9.46E-10 | 5.28E-09 |
| CA14    | -0.050860415 | 0.24926  | 0.317197 |
| CA1     | -0.18768005  | 1.81E-05 | 5.22E-05 |
| CA2     | -0.111999122 | 0.010975 | 0.019314 |
| CA3     | -0.411136563 | 2.00E-22 | 7.40E-21 |
| CA4     | -0.232283076 | 9.73E-08 | 4.02E-07 |
| CA5A    | 0.167697431  | 0.000132 | 0.000328 |
| CA5BP   | -0.099493649 | 0.023946 | 0.039226 |
| CA5B    | -0.337788606 | 3.28E-15 | 4.20E-14 |
| CA6     | 0.098413288  | 0.025526 | 0.041602 |
| CA7     | -0.069186803 | 0.116843 | 0.163342 |
| CA8     | -0.051080679 | 0.247214 | 0.314974 |
| CA9     | 0.060774169  | 0.168479 | 0.225829 |
| CAB39L  | -0.198557577 | 5.62E-06 | 1.75E-05 |
| CAB39   | 0.027283084  | 0.536732 | 0.607624 |
| CABC1   | -0.277957608 | 1.37E-10 | 8.63E-10 |
| CABIN1  | -0.358663176 | 4.44E-17 | 7.49E-16 |
| CABLES1 | -0.267492483 | 6.90E-10 | 3.93E-09 |

|          |              |          |          |
|----------|--------------|----------|----------|
| CABLES2  | -0.032777179 | 0.457951 | 0.531872 |
| CABP1    | -0.011173207 | 0.800305 | 0.840108 |
| CABP2    | 0.005037472  | 0.909205 | 0.928862 |
| CABP4    | 0.026513488  | 0.548286 | 0.618642 |
| CABP5    | -0.038854824 | 0.378889 | 0.453661 |
| CABP7    | -0.142848315 | 0.001152 | 0.002424 |
| CABYR    | 0.264078871  | 1.15E-09 | 6.34E-09 |
| CACHD1   | -0.356332074 | 7.29E-17 | 1.19E-15 |
| CACNA1A  | -0.022397341 | 0.612081 | 0.676124 |
| CACNA1B  | -0.091478204 | 0.037961 | 0.059563 |
| CACNA1C  | -0.313194753 | 3.49E-13 | 3.27E-12 |
| CACNA1D  | -0.298839181 | 4.39E-12 | 3.44E-11 |
| CACNA1E  | 0.054943161  | 0.213217 | 0.277098 |
| CACNA1F  | -0.381311274 | 2.87E-19 | 6.81E-18 |
| CACNA1G  | -0.326907687 | 2.72E-14 | 3.01E-13 |
| CACNA1H  | -0.128462109 | 0.003497 | 0.006744 |
| CACNA1I  | -0.148561261 | 0.00072  | 0.001572 |
| CACNA1S  | -0.065639266 | 0.136862 | 0.18804  |
| CACNA2D1 | 0.056122171  | 0.203543 | 0.266153 |
| CACNA2D2 | -0.387604147 | 6.58E-20 | 1.68E-18 |
| CACNA2D3 | -0.264232869 | 1.13E-09 | 6.21E-09 |
| CACNA2D4 | -0.198634482 | 5.57E-06 | 1.73E-05 |
| CACNB1   | -0.508055468 | 3.79E-35 | 1.12E-32 |
| CACNB2   | 0.005545305  | 0.900098 | 0.921966 |
| CACNB3   | -0.177560223 | 5.08E-05 | 0.000135 |
| CACNB4   | -0.305748215 | 1.32E-12 | 1.13E-11 |
| CACNG1   | -0.066728135 | 0.130455 | 0.180104 |
| CACNG2   | 0.019283463  | 0.66241  | 0.721186 |
| CACNG3   | 0.030272376  | 0.493043 | 0.566311 |
| CACNG4   | -0.169266394 | 0.000113 | 0.000286 |
| CACNG5   | -0.0138013   | 0.754695 | 0.801979 |
| CACNG6   | -0.156967938 | 0.000349 | 0.000805 |
| CACNG7   | 0.164294241  | 0.000181 | 0.00044  |
| CACNG8   | 0.133540323  | 0.002391 | 0.004756 |
| CACYBP   | 0.427230515  | 2.90E-24 | 1.46E-22 |
| CADM1    | -0.187755337 | 1.80E-05 | 5.18E-05 |
| CADM2    | 0.026223666  | 0.552669 | 0.622527 |
| CADM3    | -0.340734102 | 1.82E-15 | 2.43E-14 |
| CADM4    | -0.108441186 | 0.013808 | 0.023806 |
| CADPS2   | -0.248548645 | 1.09E-08 | 5.17E-08 |
| CADPS    | -0.21185143  | 1.23E-06 | 4.24E-06 |
| CAD      | 0.19356552   | 9.69E-06 | 2.91E-05 |
| CAGE1    | 0.166130441  | 0.000152 | 0.000376 |
| CALB1    | 0.139672921  | 0.001485 | 0.003063 |

|           |              |          |          |
|-----------|--------------|----------|----------|
| CALB2     | 0.034269669  | 0.437725 | 0.512037 |
| CALCA     | 0.174735814  | 6.71E-05 | 0.000175 |
| CALCB     | 0.17658355   | 5.59E-05 | 0.000148 |
| CALCOCO1  | -0.484380507 | 1.18E-31 | 1.78E-29 |
| CALCOCO2  | -0.208737015 | 1.77E-06 | 5.97E-06 |
| CALCRL    | -0.135788011 | 0.002013 | 0.004059 |
| CALCR     | 0.099820624  | 0.023485 | 0.038556 |
| CALD1     | -0.007065416 | 0.872919 | 0.900955 |
| CALHM1    | -0.083679729 | 0.057734 | 0.087035 |
| CALHM2    | -0.075447477 | 0.087182 | 0.125883 |
| CALHM3    | 0.055583716  | 0.207921 | 0.27115  |
| CALM1     | -0.024403965 | 0.580571 | 0.64757  |
| CALM2     | 0.159876143  | 0.00027  | 0.000636 |
| CALM3     | 0.036094624  | 0.413704 | 0.488343 |
| CALML3    | 0.125284957  | 0.004407 | 0.008354 |
| CALML4    | -0.222022047 | 3.58E-07 | 1.35E-06 |
| CALML5    | -0.064951628 | 0.141032 | 0.193078 |
| CALML6    | -0.222473856 | 3.39E-07 | 1.28E-06 |
| CALN1     | -0.086347438 | 0.050179 | 0.076804 |
| CALR3     | 0.049187853  | 0.265188 | 0.334464 |
| CALR      | 0.248729727  | 1.06E-08 | 5.05E-08 |
| CALU      | 0.404319852  | 1.13E-21 | 3.80E-20 |
| CALY      | 0.121134132  | 0.005915 | 0.010957 |
| CAMK1D    | -0.312903298 | 3.68E-13 | 3.44E-12 |
| CAMK1G    | -0.176643998 | 5.56E-05 | 0.000147 |
| CAMK1     | -0.240336522 | 3.35E-08 | 1.48E-07 |
| CAMK2A    | -0.262070952 | 1.55E-09 | 8.37E-09 |
| CAMK2B    | -0.085730968 | 0.051847 | 0.079045 |
| CAMK2D    | -0.279511277 | 1.07E-10 | 6.85E-10 |
| CAMK2G    | -0.175247806 | 6.38E-05 | 0.000167 |
| CAMK2N1   | 0.00940475   | 0.831394 | 0.865741 |
| CAMK2N2   | 0.033431111  | 0.449025 | 0.5233   |
| CAMK4     | -0.190242386 | 1.38E-05 | 4.06E-05 |
| CAMKK1    | -0.30650442  | 1.16E-12 | 1.00E-11 |
| CAMKK2    | 0.131825026  | 0.002723 | 0.005359 |
| CAMKV     | -0.037769578 | 0.392357 | 0.467257 |
| CAMLG     | 0.009651952  | 0.827031 | 0.862322 |
| CAMP      | -0.218790566 | 5.33E-07 | 1.96E-06 |
| CAMSAP1L1 | 0.077758427  | 0.0779   | 0.113921 |
| CAMSAP1   | -0.009431436 | 0.830923 | 0.865386 |
| CAMTA1    | -0.183647757 | 2.75E-05 | 7.67E-05 |
| CAMTA2    | -0.335246536 | 5.42E-15 | 6.69E-14 |
| CAND1     | 0.249856544  | 9.04E-09 | 4.36E-08 |
| CAND2     | -0.220436094 | 4.36E-07 | 1.63E-06 |



|         |              |          |          |
|---------|--------------|----------|----------|
| CANT1   | 0.212682333  | 1.11E-06 | 3.87E-06 |
| CANX    | 0.110163077  | 0.012365 | 0.021511 |
| CAP1    | 0.070628469  | 0.109395 | 0.15406  |
| CAP2    | 0.018324921  | 0.678228 | 0.735642 |
| CAPG    | -0.118982735 | 0.006868 | 0.012577 |
| CAPN10  | -0.166106043 | 0.000153 | 0.000377 |
| CAPN11  | -0.224114051 | 2.76E-07 | 1.06E-06 |
| CAPN12  | -0.196515924 | 7.03E-06 | 2.15E-05 |
| CAPN13  | -0.216962384 | 6.66E-07 | 2.41E-06 |
| CAPN14  | 0.054468183  | 0.217206 | 0.281551 |
| CAPN1   | -0.03772258  | 0.392947 | 0.467819 |
| CAPN2   | -0.127265299 | 0.003817 | 0.007309 |
| CAPN3   | -0.522188531 | 2.29E-37 | 9.93E-35 |
| CAPN5   | -0.026657045 | 0.546122 | 0.616682 |
| CAPN6   | -0.139604208 | 0.001493 | 0.003078 |
| CAPN7   | -0.048971465 | 0.267299 | 0.336873 |
| CAPN8   | -0.326314929 | 3.05E-14 | 3.35E-13 |
| CAPN9   | -0.118915214 | 0.0069   | 0.012627 |
| CAPNS1  | -0.012154152 | 0.783192 | 0.825743 |
| CAPNS2  | -0.171072985 | 9.55E-05 | 0.000244 |
| CAPRIN1 | 0.202116753  | 3.77E-06 | 1.21E-05 |
| CAPRIN2 | -0.131755872 | 0.002737 | 0.005385 |
| CAPS2   | -0.10068769  | 0.0223   | 0.0368   |
| CAPSL   | -0.181621175 | 3.38E-05 | 9.28E-05 |
| CAPS    | -0.312729457 | 3.80E-13 | 3.54E-12 |
| CAPZA1  | 0.289802418  | 2.01E-11 | 1.44E-10 |
| CAPZA2  | 0.19664349   | 6.93E-06 | 2.13E-05 |
| CAPZA3  | 0.031780595  | 0.471743 | 0.545482 |
| CAPZB   | 0.003541882  | 0.936092 | 0.949825 |
| CARD10  | -0.034632052 | 0.432892 | 0.507546 |
| CARD11  | -0.150569772 | 0.000608 | 0.001342 |
| CARD14  | 0.215430568  | 8.01E-07 | 2.85E-06 |
| CARD16  | -0.232194159 | 9.85E-08 | 4.06E-07 |
| CARD17  | 0.026636227  | 0.546435 | 0.616896 |
| CARD18  | 0.099647463  | 0.023728 | 0.038901 |
| CARD6   | -0.141555057 | 0.001278 | 0.002668 |
| CARD8   | -0.359643708 | 3.60E-17 | 6.18E-16 |
| CARD9   | -0.29533387  | 7.97E-12 | 6.06E-11 |
| CARHSP1 | 0.134881318  | 0.002158 | 0.004329 |
| CARKD   | -0.089141076 | 0.043172 | 0.066924 |
| CARM1   | 0.183797159  | 2.71E-05 | 7.56E-05 |
| CARNS1  | -0.256445541 | 3.54E-09 | 1.80E-08 |
| CARS2   | -0.050237631 | 0.255111 | 0.323613 |
| CARS    | 0.284377896  | 4.90E-11 | 3.29E-10 |

|            |              |          |          |
|------------|--------------|----------|----------|
| CARTPT     | -0.072685615 | 0.09942  | 0.141559 |
| CASC1      | -0.302897861 | 2.17E-12 | 1.80E-11 |
| CASC2      | -0.27894902  | 1.17E-10 | 7.45E-10 |
| CASC3      | -0.03098445  | 0.482923 | 0.556645 |
| CASC4      | 0.054956109  | 0.213109 | 0.276976 |
| CASC5      | 0.438963273  | 1.14E-25 | 7.10E-24 |
| CASD1      | -0.179770379 | 4.07E-05 | 0.00011  |
| CASKIN1    | 0.102360067  | 0.020159 | 0.033567 |
| CASKIN2    | -0.299125337 | 4.18E-12 | 3.29E-11 |
| CASK       | -0.015268961 | 0.729579 | 0.780916 |
| CASP10     | -0.290473157 | 1.80E-11 | 1.30E-10 |
| CASP12     | -0.287088231 | 3.15E-11 | 2.18E-10 |
| CASP14     | 0.117674285  | 0.007512 | 0.013651 |
| CASP1      | -0.260420977 | 1.98E-09 | 1.05E-08 |
| CASP2      | 0.032840303  | 0.457085 | 0.531114 |
| CASP3      | 0.248723724  | 1.06E-08 | 5.05E-08 |
| CASP4      | -0.011082181 | 0.801898 | 0.84125  |
| CASP5      | 0.094736154  | 0.031593 | 0.050446 |
| CASP6      | 0.189662046  | 1.47E-05 | 4.30E-05 |
| CASP7      | 0.020384252  | 0.644428 | 0.705065 |
| CASP8AP2   | -0.019399178 | 0.66051  | 0.719487 |
| CASP8      | -0.089576752 | 0.042157 | 0.065519 |
| CASP9      | 0.034399847  | 0.435985 | 0.510484 |
| CASQ1      | -0.380341473 | 3.59E-19 | 8.36E-18 |
| CASQ2      | -0.373317952 | 1.78E-18 | 3.69E-17 |
| CASR       | -0.318660668 | 1.28E-13 | 1.28E-12 |
| CASS4      | -0.348818889 | 3.51E-16 | 5.20E-15 |
| CAST       | -0.122776361 | 0.00527  | 0.009863 |
| CASZ1      | -0.398057676 | 5.31E-21 | 1.61E-19 |
| CATSPER1   | 0.04622476   | 0.295092 | 0.366422 |
| CATSPER2P1 | 0.13582619   | 0.002007 | 0.004048 |
| CATSPER2   | -0.294193387 | 9.67E-12 | 7.26E-11 |
| CATSPER3   | -0.078160163 | 0.076372 | 0.11198  |
| CATSPER4   | 0.014030276  | 0.750758 | 0.798837 |
| CATSPERB   | 0.050294447  | 0.254574 | 0.323115 |
| CATSPERG   | -0.28804148  | 2.69E-11 | 1.88E-10 |
| CAT        | -0.290991355 | 1.65E-11 | 1.20E-10 |
| CAV1       | -0.068297319 | 0.121633 | 0.169304 |
| CAV2       | -0.067625895 | 0.125349 | 0.173678 |
| CAV3       | -0.36546036  | 1.02E-17 | 1.91E-16 |
| CBARA1     | 0.091089437  | 0.038789 | 0.060723 |
| CBFA2T2    | -0.162499231 | 0.000213 | 0.000513 |
| CBFA2T3    | -0.394934923 | 1.14E-20 | 3.26E-19 |
| CBFB       | 0.081470507  | 0.064683 | 0.096405 |

|          |              |          |          |
|----------|--------------|----------|----------|
| CBLB     | -0.080132477 | 0.069217 | 0.102498 |
| CBLC     | 0.141211358  | 0.001314 | 0.002735 |
| CBLL1    | 0.184309855  | 2.57E-05 | 7.20E-05 |
| CBLN1    | -0.081822844 | 0.063531 | 0.094883 |
| CBLN2    | 0.014800828  | 0.73756  | 0.787645 |
| CBLN3    | -0.204594721 | 2.85E-06 | 9.28E-06 |
| CBLN4    | -0.159207837 | 0.000286 | 0.000672 |
| CBL      | -0.063505081 | 0.150119 | 0.203982 |
| CBR1     | 0.117994399  | 0.007349 | 0.013387 |
| CBR3     | 0.077219151  | 0.079991 | 0.116654 |
| CBR4     | -0.199926387 | 4.82E-06 | 1.52E-05 |
| CBS      | 0.17894096   | 4.43E-05 | 0.000119 |
| CBWD1    | 0.109099817  | 0.01324  | 0.022899 |
| CBWD2    | -0.010475539 | 0.812535 | 0.850267 |
| CBWD3    | 0.145167467  | 0.000954 | 0.002035 |
| CBWD5    | 0.101037734  | 0.021836 | 0.03611  |
| CBWD6    | 0.091134676  | 0.038691 | 0.060594 |
| CBX1     | 0.187560743  | 1.83E-05 | 5.28E-05 |
| CBX2     | 0.242689416  | 2.44E-08 | 1.10E-07 |
| CBX3     | 0.408489264  | 3.94E-22 | 1.42E-20 |
| CBX4     | 0.015711499  | 0.722061 | 0.774237 |
| CBX5     | 0.091080869  | 0.038807 | 0.060747 |
| CBX6     | -0.18339461  | 2.82E-05 | 7.85E-05 |
| CBX7     | -0.610103406 | 7.88E-54 | 7.87E-50 |
| CBX8     | 0.04090489   | 0.354232 | 0.428855 |
| CBY1     | -0.081794301 | 0.063624 | 0.094996 |
| CC2D1A   | -0.239438398 | 3.78E-08 | 1.66E-07 |
| CC2D1B   | -0.257678118 | 2.96E-09 | 1.52E-08 |
| CC2D2A   | -0.198226483 | 5.83E-06 | 1.81E-05 |
| CC2D2B   | -0.330838636 | 1.28E-14 | 1.48E-13 |
| CCAR1    | 0.253590791  | 5.33E-09 | 2.65E-08 |
| CCBE1    | -0.022596436 | 0.608921 | 0.673442 |
| CCBL1    | -0.081803194 | 0.063595 | 0.09496  |
| CCBL2    | -0.025295855 | 0.566813 | 0.635416 |
| CCBP2    | -0.026677024 | 0.545821 | 0.616411 |
| CCDC101  | -0.328767961 | 1.91E-14 | 2.16E-13 |
| CCDC102A | -0.259298516 | 2.34E-09 | 1.22E-08 |
| CCDC102B | -0.042741638 | 0.333021 | 0.406737 |
| CCDC103  | -0.049395849 | 0.26317  | 0.332275 |
| CCDC104  | -0.057794588 | 0.190373 | 0.251001 |
| CCDC105  | 0.038727727  | 0.380451 | 0.455104 |
| CCDC106  | -0.160304162 | 0.00026  | 0.000614 |
| CCDC107  | -0.091698424 | 0.037498 | 0.058888 |
| CCDC108  | -0.229295434 | 1.43E-07 | 5.75E-07 |

|           |              |          |          |
|-----------|--------------|----------|----------|
| CCDC109A  | 0.186654466  | 2.02E-05 | 5.76E-05 |
| CCDC109B  | 0.053640285  | 0.224286 | 0.289434 |
| CCDC110   | 0.103064828  | 0.019311 | 0.032282 |
| CCDC111   | -0.055180783 | 0.211241 | 0.27487  |
| CCDC112   | 0.047730655  | 0.279624 | 0.350151 |
| CCDC113   | -0.14714258  | 0.00081  | 0.001752 |
| CCDC114   | -0.350169837 | 2.66E-16 | 3.97E-15 |
| CCDC115   | -0.318585708 | 1.30E-13 | 1.30E-12 |
| CCDC116   | -0.180631718 | 3.74E-05 | 0.000102 |
| CCDC117   | 0.04039612   | 0.360255 | 0.435039 |
| CCDC11    | -0.185998347 | 2.16E-05 | 6.13E-05 |
| CCDC120   | -0.252182049 | 6.51E-09 | 3.20E-08 |
| CCDC121   | -0.16230119  | 0.000217 | 0.000521 |
| CCDC122   | 0.009456375  | 0.830483 | 0.86513  |
| CCDC123   | 0.080685726  | 0.067312 | 0.099965 |
| CCDC124   | 0.052230437  | 0.23672  | 0.303383 |
| CCDC125   | -0.111204518 | 0.011559 | 0.020245 |
| CCDC126   | 0.150500484  | 0.000611 | 0.00135  |
| CCDC127   | 0.052361503  | 0.235544 | 0.302108 |
| CCDC129   | -0.156455617 | 0.000365 | 0.000839 |
| CCDC12    | -0.113638398 | 0.009852 | 0.017524 |
| CCDC130   | -0.278830717 | 1.19E-10 | 7.58E-10 |
| CCDC132   | 0.120842374  | 0.006037 | 0.011164 |
| CCDC134   | 0.049204093  | 0.26503  | 0.334307 |
| CCDC135   | -0.212668045 | 1.11E-06 | 3.87E-06 |
| CCDC136   | -0.219470318 | 4.91E-07 | 1.82E-06 |
| CCDC137   | 0.139099136  | 0.001554 | 0.003193 |
| CCDC138   | 0.363418826  | 1.59E-17 | 2.87E-16 |
| CCDC13    | -0.294417891 | 9.31E-12 | 7.00E-11 |
| CCDC140   | 0.009138365  | 0.836101 | 0.869737 |
| CCDC141   | -0.268974274 | 5.51E-10 | 3.18E-09 |
| CCDC142   | -0.033925315 | 0.442346 | 0.51663  |
| CCDC144A  | -0.143361043 | 0.001105 | 0.002333 |
| CCDC144B  | -0.160568101 | 0.000253 | 0.000601 |
| CCDC144C  | -0.019227301 | 0.663332 | 0.722033 |
| CCDC144NL | 0.087873086  | 0.046243 | 0.071259 |
| CCDC146   | -0.401796112 | 2.11E-21 | 6.88E-20 |
| CCDC147   | -0.278526737 | 1.25E-10 | 7.94E-10 |
| CCDC148   | -0.165534439 | 0.000161 | 0.000396 |
| CCDC149   | -0.101331584 | 0.021453 | 0.035538 |
| CCDC14    | -0.208697825 | 1.78E-06 | 5.99E-06 |
| CCDC150   | 0.176637302  | 5.57E-05 | 0.000147 |
| CCDC151   | -0.143304429 | 0.00111  | 0.002343 |
| CCDC152   | -0.313489959 | 3.31E-13 | 3.12E-12 |

|          |              |          |          |
|----------|--------------|----------|----------|
| CCDC153  | -0.263648437 | 1.23E-09 | 6.72E-09 |
| CCDC154  | -0.205182434 | 2.67E-06 | 8.71E-06 |
| CCDC155  | -0.110279222 | 0.012273 | 0.021365 |
| CCDC157  | -0.288201219 | 2.62E-11 | 1.83E-10 |
| CCDC158  | -0.067943109 | 0.123583 | 0.171599 |
| CCDC159  | -0.425637018 | 4.45E-24 | 2.16E-22 |
| CCDC15   | 0.045628566  | 0.30137  | 0.37299  |
| CCDC160  | -0.077986057 | 0.077031 | 0.112798 |
| CCDC163P | 0.056249713  | 0.202516 | 0.265082 |
| CCDC17   | -0.273657031 | 2.68E-10 | 1.62E-09 |
| CCDC18   | 0.075656944  | 0.086306 | 0.124689 |
| CCDC19   | -0.219080893 | 5.15E-07 | 1.90E-06 |
| CCDC21   | 0.115777823  | 0.008541 | 0.015341 |
| CCDC22   | -0.106032572 | 0.016075 | 0.027301 |
| CCDC23   | 0.047840465  | 0.278518 | 0.349029 |
| CCDC24   | -0.23954103  | 3.73E-08 | 1.64E-07 |
| CCDC25   | -0.023837359 | 0.589392 | 0.655579 |
| CCDC27   | -0.08748326  | 0.047223 | 0.072602 |
| CCDC28A  | -0.299492486 | 3.92E-12 | 3.10E-11 |
| CCDC28B  | -0.085147728 | 0.053468 | 0.081284 |
| CCDC30   | -0.390160095 | 3.59E-20 | 9.61E-19 |
| CCDC33   | -0.221687252 | 3.73E-07 | 1.40E-06 |
| CCDC34   | 0.378032964  | 6.10E-19 | 1.37E-17 |
| CCDC36   | -0.127650665 | 0.003712 | 0.007124 |
| CCDC37   | -0.286942461 | 3.22E-11 | 2.23E-10 |
| CCDC38   | -0.062401784 | 0.157345 | 0.212572 |
| CCDC39   | -0.325589495 | 3.50E-14 | 3.81E-13 |
| CCDC3    | -0.133781207 | 0.002348 | 0.004674 |
| CCDC40   | -0.2889036   | 2.34E-11 | 1.65E-10 |
| CCDC41   | -0.004406082 | 0.920545 | 0.937715 |
| CCDC42B  | -0.276278057 | 1.78E-10 | 1.11E-09 |
| CCDC42   | -0.240246137 | 3.39E-08 | 1.50E-07 |
| CCDC43   | 0.303750992  | 1.87E-12 | 1.57E-11 |
| CCDC45   | -0.133631197 | 0.002375 | 0.004727 |
| CCDC46   | -0.348423133 | 3.81E-16 | 5.61E-15 |
| CCDC47   | -0.023771015 | 0.590428 | 0.656477 |
| CCDC48   | -0.458469761 | 3.95E-28 | 3.25E-26 |
| CCDC50   | -0.046668254 | 0.290478 | 0.361591 |
| CCDC51   | 0.287831344  | 2.79E-11 | 1.94E-10 |
| CCDC52   | 0.081822007  | 0.063534 | 0.094883 |
| CCDC53   | -0.051256352 | 0.24559  | 0.313244 |
| CCDC54   | -0.033270401 | 0.45121  | 0.52557  |
| CCDC55   | -0.067649397 | 0.125218 | 0.17352  |
| CCDC56   | 0.030766967  | 0.486002 | 0.559445 |

|         |              |          |          |
|---------|--------------|----------|----------|
| CCDC57  | -0.328785933 | 1.90E-14 | 2.16E-13 |
| CCDC58  | 0.44825644   | 8.02E-27 | 5.75E-25 |
| CCDC59  | 0.412831976  | 1.30E-22 | 4.96E-21 |
| CCDC60  | -0.227468273 | 1.81E-07 | 7.15E-07 |
| CCDC61  | -0.278815271 | 1.19E-10 | 7.60E-10 |
| CCDC62  | -0.033079741 | 0.453809 | 0.52789  |
| CCDC63  | 0.035720859  | 0.418559 | 0.493317 |
| CCDC64B | -0.397689448 | 5.81E-21 | 1.75E-19 |
| CCDC64  | -0.006758499 | 0.878395 | 0.904926 |
| CCDC65  | -0.205551585 | 2.55E-06 | 8.39E-06 |
| CCDC66  | -0.300396217 | 3.36E-12 | 2.69E-11 |
| CCDC67  | -0.04150076  | 0.347259 | 0.421625 |
| CCDC68  | -0.165690655 | 0.000159 | 0.00039  |
| CCDC69  | -0.286840136 | 3.28E-11 | 2.26E-10 |
| CCDC6   | 0.030085031  | 0.495724 | 0.568904 |
| CCDC70  | 0.105659916  | 0.016454 | 0.027906 |
| CCDC71  | -0.034278399 | 0.437608 | 0.511934 |
| CCDC72  | 0.076096936  | 0.084488 | 0.122398 |
| CCDC73  | -0.097432329 | 0.027037 | 0.04384  |
| CCDC74A | -0.108131431 | 0.014083 | 0.024244 |
| CCDC74B | -0.130169732 | 0.003082 | 0.006006 |
| CCDC75  | 0.091707991  | 0.037478 | 0.058865 |
| CCDC76  | -0.004381868 | 0.92098  | 0.938111 |
| CCDC77  | 0.322960612  | 5.75E-14 | 6.02E-13 |
| CCDC78  | -0.240878769 | 3.12E-08 | 1.38E-07 |
| CCDC79  | -0.087727193 | 0.046608 | 0.071766 |
| CCDC7   | 0.013810567  | 0.754535 | 0.801917 |
| CCDC80  | 0.035423849  | 0.422441 | 0.496984 |
| CCDC81  | -0.289488803 | 2.12E-11 | 1.51E-10 |
| CCDC82  | -0.112590386 | 0.010558 | 0.018652 |
| CCDC83  | 0.027370642  | 0.535425 | 0.606591 |
| CCDC84  | -0.298754953 | 4.45E-12 | 3.49E-11 |
| CCDC85A | -0.265501383 | 9.31E-10 | 5.21E-09 |
| CCDC85B | 0.083249309  | 0.059037 | 0.088825 |
| CCDC85C | 0.165350892  | 0.000164 | 0.000402 |
| CCDC86  | 0.381519115  | 2.74E-19 | 6.53E-18 |
| CCDC87  | 0.029352995  | 0.506274 | 0.57898  |
| CCDC88A | -0.001595256 | 0.971191 | 0.978288 |
| CCDC88B | -0.334358023 | 6.45E-15 | 7.89E-14 |
| CCDC88C | -0.192527196 | 1.08E-05 | 3.23E-05 |
| CCDC89  | -0.226168216 | 2.13E-07 | 8.33E-07 |
| CCDC8   | -0.229795357 | 1.34E-07 | 5.42E-07 |
| CCDC90A | 0.022038897  | 0.617788 | 0.681176 |
| CCDC90B | 0.228433252  | 1.60E-07 | 6.36E-07 |

|             |              |          |          |
|-------------|--------------|----------|----------|
| CCDC91      | 0.174030013  | 7.18E-05 | 0.000187 |
| CCDC92      | -0.302492347 | 2.33E-12 | 1.92E-11 |
| CCDC93      | -0.260461708 | 1.97E-09 | 1.04E-08 |
| CCDC94      | -0.143675878 | 0.001077 | 0.002278 |
| CCDC96      | -0.272643964 | 3.14E-10 | 1.88E-09 |
| CCDC97      | -0.17666694  | 5.55E-05 | 0.000147 |
| CCDC99      | 0.41829966   | 3.13E-23 | 1.34E-21 |
| CCDC9       | -0.097517287 | 0.026903 | 0.043655 |
| CCHCR1      | -0.112954537 | 0.010308 | 0.018252 |
| CCIN        | 0.082702862  | 0.060727 | 0.091168 |
| CCKAR       | -0.034682698 | 0.432219 | 0.506906 |
| CCKBR       | -0.089659425 | 0.041967 | 0.065263 |
| CCK         | 0.053067676  | 0.229279 | 0.295114 |
| CCL11       | 0.093273695  | 0.034329 | 0.054347 |
| CCL13       | -0.110923388 | 0.011772 | 0.020562 |
| CCL14-CCL15 | -0.017020385 | 0.699983 | 0.755508 |
| CCL14       | -0.311957228 | 4.36E-13 | 4.03E-12 |
| CCL15       | 0.024161895  | 0.584332 | 0.651111 |
| CCL16       | -0.318238977 | 1.39E-13 | 1.38E-12 |
| CCL17       | -0.290549115 | 1.78E-11 | 1.28E-10 |
| CCL18       | -0.00615742  | 0.889137 | 0.913121 |
| CCL19       | -0.245178141 | 1.73E-08 | 8.00E-08 |
| CCL1        | 0.033126117  | 0.453176 | 0.52743  |
| CCL20       | 0.217753785  | 6.05E-07 | 2.20E-06 |
| CCL21       | 0.034242078  | 0.438094 | 0.512353 |
| CCL22       | -0.179513825 | 4.18E-05 | 0.000113 |
| CCL23       | -0.195230073 | 8.09E-06 | 2.46E-05 |
| CCL24       | 0.081176627  | 0.065658 | 0.097785 |
| CCL25       | 0.025793461  | 0.559206 | 0.62858  |
| CCL26       | 0.287718972  | 2.84E-11 | 1.98E-10 |
| CCL27       | -0.097262312 | 0.027307 | 0.04422  |
| CCL28       | -0.238491452 | 4.29E-08 | 1.87E-07 |
| CCL2        | -0.059066347 | 0.180786 | 0.240039 |
| CCL3L1      | 0.03506926   | 0.427103 | 0.501758 |
| CCL3L3      | -0.119346612 | 0.006698 | 0.012289 |
| CCL3        | 0.067473274  | 0.126206 | 0.174769 |
| CCL4L2      | 0.063274844  | 0.151606 | 0.205736 |
| CCL4        | 0.0996863    | 0.023674 | 0.038824 |
| CCL5        | -0.01574825  | 0.721437 | 0.773717 |
| CCL7        | 0.199579286  | 5.01E-06 | 1.57E-05 |
| CCL8        | 0.166153113  | 0.000152 | 0.000375 |
| CCM2        | 0.024973126  | 0.571773 | 0.6399   |
| CCNA1       | -0.035701928 | 0.418806 | 0.49352  |
| CCNA2       | 0.561194523  | 4.57E-44 | 7.03E-41 |

|          |              |          |          |
|----------|--------------|----------|----------|
| CCNB1IP1 | 0.224432085  | 2.65E-07 | 1.02E-06 |
| CCNB1    | 0.598637682  | 2.17E-51 | 1.09E-47 |
| CCNB2    | 0.565093446  | 8.73E-45 | 1.59E-41 |
| CCNB3    | -0.034433814 | 0.435532 | 0.510073 |
| CCNC     | 0.212448639  | 1.14E-06 | 3.97E-06 |
| CCND1    | -0.037410301 | 0.396879 | 0.471822 |
| CCND2    | -0.229220874 | 1.45E-07 | 5.80E-07 |
| CCND3    | -0.194142219 | 9.11E-06 | 2.74E-05 |
| CCNDBP1  | -0.157030957 | 0.000347 | 0.000801 |
| CCNE1    | 0.331316058  | 1.17E-14 | 1.36E-13 |
| CCNE2    | 0.34315991   | 1.12E-15 | 1.53E-14 |
| CCNF     | 0.32637213   | 3.02E-14 | 3.31E-13 |
| CCNG1    | -0.072029523 | 0.10252  | 0.145351 |
| CCNG2    | 0.126577364  | 0.004014 | 0.007661 |
| CCNH     | -0.037080381 | 0.401059 | 0.475636 |
| CCNI2    | 0.063080806  | 0.152867 | 0.207209 |
| CCNI     | 0.129016749  | 0.003357 | 0.006499 |
| CCNJL    | -0.241940421 | 2.70E-08 | 1.21E-07 |
| CCNJ     | 0.232532805  | 9.42E-08 | 3.89E-07 |
| CCNK     | 0.194303766  | 8.95E-06 | 2.70E-05 |
| CCNL1    | -0.277166697 | 1.55E-10 | 9.68E-10 |
| CCNL2    | -0.307445897 | 9.78E-13 | 8.58E-12 |
| CCNO     | -0.030798897 | 0.485549 | 0.559117 |
| CCNT1    | 0.118917093  | 0.006899 | 0.012626 |
| CCNT2    | -0.167719099 | 0.000131 | 0.000328 |
| CCNYL1   | 0.055419734  | 0.209267 | 0.272622 |
| CCNY     | 0.153135665  | 0.000488 | 0.001096 |
| CCPG1    | -0.154037011 | 0.000451 | 0.00102  |
| CCR10    | 0.094159053  | 0.03265  | 0.051967 |
| CCR1     | -0.043049232 | 0.32955  | 0.402996 |
| CCR2     | -0.181045781 | 3.58E-05 | 9.80E-05 |
| CCR3     | -0.044021162 | 0.318738 | 0.391359 |
| CCR4     | -0.262036931 | 1.56E-09 | 8.41E-09 |
| CCR5     | -0.139930716 | 0.001455 | 0.003005 |
| CCR6     | -0.377647349 | 6.67E-19 | 1.49E-17 |
| CCR7     | -0.282379594 | 6.76E-11 | 4.46E-10 |
| CCR8     | -0.079304502 | 0.072151 | 0.106392 |
| CCR9     | -0.164494004 | 0.000177 | 0.000433 |
| CCRL1    | -0.169305755 | 0.000113 | 0.000285 |
| CCRL2    | -0.202851086 | 3.47E-06 | 1.12E-05 |
| CCRN4L   | 0.426415418  | 3.61E-24 | 1.80E-22 |
| CCS      | -0.10483929  | 0.017314 | 0.029203 |
| CCT2     | 0.399333492  | 3.88E-21 | 1.21E-19 |
| CCT3     | 0.468259718  | 2.00E-29 | 2.00E-27 |



|          |              |          |          |
|----------|--------------|----------|----------|
| CCT4     | 0.46226084   | 1.26E-28 | 1.13E-26 |
| CCT5     | 0.458373997  | 4.06E-28 | 3.33E-26 |
| CCT6A    | 0.450749111  | 3.88E-27 | 2.92E-25 |
| CCT6B    | -0.317301788 | 1.65E-13 | 1.62E-12 |
| CCT6P1   | -0.121575695 | 0.005735 | 0.010653 |
| CCT7     | 0.48686943   | 5.22E-32 | 8.22E-30 |
| CCT8L2   | -0.102586133 | 0.019883 | 0.033154 |
| CCT8     | 0.392802649  | 1.90E-20 | 5.27E-19 |
| CD101    | -0.263026276 | 1.35E-09 | 7.32E-09 |
| CD109    | 0.206603513  | 2.26E-06 | 7.49E-06 |
| CD14     | -0.076040797 | 0.084718 | 0.122692 |
| CD151    | -0.101222416 | 0.021595 | 0.035752 |
| CD160    | -0.188687941 | 1.63E-05 | 4.72E-05 |
| CD163L1  | 0.063945485  | 0.147307 | 0.200583 |
| CD163    | -0.043600807 | 0.323385 | 0.396505 |
| CD164L2  | -0.31283593  | 3.72E-13 | 3.48E-12 |
| CD164    | 0.027055818  | 0.540131 | 0.611022 |
| CD177    | 0.070565162  | 0.109714 | 0.154412 |
| CD180    | -0.13164677  | 0.00276  | 0.005424 |
| CD19     | -0.139702354 | 0.001482 | 0.003057 |
| CD1A     | -0.331632042 | 1.10E-14 | 1.28E-13 |
| CD1B     | -0.346541881 | 5.61E-16 | 8.06E-15 |
| CD1C     | -0.398807399 | 4.42E-21 | 1.36E-19 |
| CD1D     | -0.216019195 | 7.46E-07 | 2.67E-06 |
| CD1E     | -0.423984964 | 6.93E-24 | 3.25E-22 |
| CD200R1L | -0.07774445  | 0.077954 | 0.113966 |
| CD200R1  | -0.259934016 | 2.13E-09 | 1.12E-08 |
| CD200    | -0.009792502 | 0.824553 | 0.860276 |
| CD207    | -0.383834012 | 1.60E-19 | 3.94E-18 |
| CD209    | 0.007480385  | 0.865524 | 0.894478 |
| CD226    | -0.089234521 | 0.042952 | 0.066636 |
| CD22     | -0.375455362 | 1.10E-18 | 2.37E-17 |
| CD244    | -0.090502663 | 0.040067 | 0.062562 |
| CD247    | -0.129014671 | 0.003357 | 0.006499 |
| CD248    | -0.015044714 | 0.733398 | 0.784122 |
| CD24     | -0.035925476 | 0.415897 | 0.490642 |
| CD274    | 0.092672985  | 0.035509 | 0.056072 |
| CD276    | 0.195324183  | 8.01E-06 | 2.43E-05 |
| CD27     | -0.155019828 | 0.000414 | 0.000943 |
| CD28     | -0.187498961 | 1.85E-05 | 5.31E-05 |
| CD2AP    | 0.195891049  | 7.53E-06 | 2.29E-05 |
| CD2BP2   | -0.037983379 | 0.389681 | 0.464485 |
| CD2      | -0.135404027 | 0.002073 | 0.004173 |
| CD300A   | -0.024625867 | 0.577134 | 0.644707 |

|         |              |          |          |
|---------|--------------|----------|----------|
| CD300C  | -0.198467132 | 5.67E-06 | 1.76E-05 |
| CD300E  | -0.016433706 | 0.709849 | 0.764053 |
| CD300LB | -0.272240038 | 3.34E-10 | 1.99E-09 |
| CD300LD | 0.017080829  | 0.698969 | 0.754568 |
| CD300LF | -0.258749701 | 2.53E-09 | 1.31E-08 |
| CD300LG | -0.374951959 | 1.23E-18 | 2.64E-17 |
| CD302   | -0.423497203 | 7.90E-24 | 3.66E-22 |
| CD320   | 0.077479902  | 0.078974 | 0.115331 |
| CD33    | -0.270979285 | 4.05E-10 | 2.39E-09 |
| CD34    | -0.299741887 | 3.76E-12 | 2.98E-11 |
| CD36    | -0.174164598 | 7.09E-05 | 0.000185 |
| CD37    | -0.339342652 | 2.41E-15 | 3.15E-14 |
| CD38    | 0.023306821  | 0.597706 | 0.66324  |
| CD3D    | -0.059571186 | 0.17708  | 0.235981 |
| CD3EAP  | 0.111387162  | 0.011422 | 0.020039 |
| CD3E    | -0.160552957 | 0.000254 | 0.000601 |
| CD3G    | -0.062844851 | 0.154412 | 0.209062 |
| CD40LG  | -0.35993227  | 3.38E-17 | 5.85E-16 |
| CD40    | -0.20501975  | 2.72E-06 | 8.87E-06 |
| CD44    | -0.184891083 | 2.42E-05 | 6.81E-05 |
| CD46    | 0.093791815  | 0.033337 | 0.052931 |
| CD47    | -0.238121081 | 4.51E-08 | 1.95E-07 |
| CD48    | -0.178431225 | 4.66E-05 | 0.000125 |
| CD4     | -0.269837364 | 4.83E-10 | 2.81E-09 |
| CD52    | -0.256234241 | 3.65E-09 | 1.85E-08 |
| CD53    | -0.138050805 | 0.001688 | 0.003448 |
| CD55    | -0.080887729 | 0.066627 | 0.099059 |
| CD58    | -0.010249956 | 0.8165   | 0.85361  |
| CD59    | -0.185149502 | 2.36E-05 | 6.64E-05 |
| CD5L    | -0.147649784 | 0.000777 | 0.001685 |
| CD5     | -0.250822454 | 7.89E-09 | 3.84E-08 |
| CD63    | -0.023932897 | 0.5879   | 0.654284 |
| CD68    | -0.097205104 | 0.027398 | 0.044355 |
| CD69    | -0.22685476  | 1.95E-07 | 7.69E-07 |
| CD6     | -0.241608819 | 2.82E-08 | 1.26E-07 |
| CD70    | 0.067182391  | 0.127852 | 0.176839 |
| CD72    | -0.066813683 | 0.129962 | 0.179507 |
| CD74    | -0.383530792 | 1.71E-19 | 4.18E-18 |
| CD79A   | -0.105715526 | 0.016397 | 0.027817 |
| CD79B   | -0.141442849 | 0.00129  | 0.00269  |
| CD7     | 0.002011589  | 0.963677 | 0.971993 |
| CD80    | -0.163759818 | 0.00019  | 0.00046  |
| CD81    | -0.373961122 | 1.54E-18 | 3.25E-17 |
| CD82    | -0.347235213 | 4.87E-16 | 7.07E-15 |

|          |              |          |          |
|----------|--------------|----------|----------|
| CD83     | -0.397723127 | 5.77E-21 | 1.74E-19 |
| CD84     | -0.167881123 | 0.000129 | 0.000323 |
| CD86     | -0.118431431 | 0.007133 | 0.013018 |
| CD8A     | 0.01726412   | 0.695899 | 0.751831 |
| CD8B     | 0.024341237  | 0.581545 | 0.648475 |
| CD93     | -0.179714076 | 4.10E-05 | 0.000111 |
| CD96     | -0.179538859 | 4.17E-05 | 0.000113 |
| CD97     | -0.253102975 | 5.71E-09 | 2.83E-08 |
| CD99L2   | -0.023244983 | 0.598678 | 0.664131 |
| CD99     | 0.145364243  | 0.000938 | 0.002004 |
| CD9      | -0.103085296 | 0.019287 | 0.032246 |
| CDADC1   | -0.205486308 | 2.57E-06 | 8.45E-06 |
| CDAN1    | -0.189568144 | 1.49E-05 | 4.34E-05 |
| CDA      | 0.218991514  | 5.20E-07 | 1.92E-06 |
| CDC123   | 0.387953279  | 6.06E-20 | 1.57E-18 |
| CDC14A   | -0.190026484 | 1.41E-05 | 4.15E-05 |
| CDC14B   | -0.183918736 | 2.67E-05 | 7.48E-05 |
| CDC14C   | -0.035105771 | 0.426622 | 0.501223 |
| CDC16    | -0.035443456 | 0.422184 | 0.496711 |
| CDC20B   | -0.080723072 | 0.067185 | 0.099791 |
| CDC20    | 0.53314987   | 3.67E-39 | 2.62E-36 |
| CDC23    | 0.066710874  | 0.130555 | 0.180217 |
| CDC25A   | 0.461807405  | 1.44E-28 | 1.29E-26 |
| CDC25B   | -0.034487624 | 0.434815 | 0.509442 |
| CDC25C   | 0.500856046  | 4.68E-34 | 1.10E-31 |
| CDC26    | 0.118939915  | 0.006888 | 0.01261  |
| CDC27    | 0.344422028  | 8.65E-16 | 1.20E-14 |
| CDC34    | 0.186220442  | 2.11E-05 | 6.01E-05 |
| CDC37L1  | 0.055429728  | 0.209185 | 0.272568 |
| CDC37    | 0.000560646  | 0.989873 | 0.992555 |
| CDC40    | -0.059059823 | 0.180834 | 0.240087 |
| CDC42BPA | -0.247753902 | 1.21E-08 | 5.73E-08 |
| CDC42BPB | 0.050863164  | 0.249235 | 0.317185 |
| CDC42BPG | -0.290266799 | 1.86E-11 | 1.34E-10 |
| CDC42EP1 | -0.244034916 | 2.03E-08 | 9.27E-08 |
| CDC42EP2 | 0.12875771   | 0.003422 | 0.006612 |
| CDC42EP3 | -0.22632583  | 2.09E-07 | 8.18E-07 |
| CDC42EP4 | -0.248286372 | 1.13E-08 | 5.34E-08 |
| CDC42EP5 | 0.074340192  | 0.091934 | 0.131878 |
| CDC42SE1 | 0.088072232  | 0.045749 | 0.070563 |
| CDC42SE2 | -0.113436168 | 0.009985 | 0.017734 |
| CDC42    | 0.081948699  | 0.063124 | 0.094382 |
| CDC45    | 0.460568905  | 2.10E-28 | 1.79E-26 |
| CDC5L    | 0.27962685   | 1.05E-10 | 6.74E-10 |

|        |              |          |          |
|--------|--------------|----------|----------|
| CDC6   | 0.494597122  | 3.97E-33 | 7.68E-31 |
| CDC73  | 0.304404305  | 1.67E-12 | 1.41E-11 |
| CDC7   | 0.288931237  | 2.32E-11 | 1.64E-10 |
| CDCA2  | 0.482186474  | 2.41E-31 | 3.42E-29 |
| CDCA3  | 0.501647651  | 3.56E-34 | 8.47E-32 |
| CDCA4  | 0.443057132  | 3.58E-26 | 2.38E-24 |
| CDCA5  | 0.507526917  | 4.57E-35 | 1.30E-32 |
| CDCA7L | -0.17741277  | 5.15E-05 | 0.000137 |
| CDCA7  | 0.156589511  | 0.000361 | 0.00083  |
| CDCA8  | 0.48809563   | 3.49E-32 | 5.71E-30 |
| CDCP1  | 0.112651833  | 0.010515 | 0.018578 |
| CDCP2  | -0.11200491  | 0.010971 | 0.01931  |
| CDH10  | -0.078087427 | 0.076647 | 0.11235  |
| CDH11  | -0.097784319 | 0.026486 | 0.043027 |
| CDH12  | 0.011726939  | 0.790633 | 0.832052 |
| CDH13  | -0.006519755 | 0.882659 | 0.908053 |
| CDH15  | -0.066304093 | 0.132922 | 0.183206 |
| CDH16  | -0.130099806 | 0.003098 | 0.006034 |
| CDH17  | 0.150015142  | 0.000637 | 0.001402 |
| CDH18  | 0.207247699  | 2.10E-06 | 6.99E-06 |
| CDH19  | -0.189662657 | 1.47E-05 | 4.30E-05 |
| CDH1   | -0.158284032 | 0.000311 | 0.000724 |
| CDH20  | -0.352197785 | 1.74E-16 | 2.68E-15 |
| CDH22  | -0.148646645 | 0.000715 | 0.001561 |
| CDH23  | -0.40990497  | 2.75E-22 | 9.99E-21 |
| CDH24  | 0.212326858  | 1.16E-06 | 4.02E-06 |
| CDH26  | -0.15737934  | 0.000337 | 0.000778 |
| CDH2   | 0.145242975  | 0.000948 | 0.002023 |
| CDH3   | 0.028468442  | 0.519178 | 0.591436 |
| CDH4   | -0.159188885 | 0.000287 | 0.000673 |
| CDH5   | -0.224472001 | 2.64E-07 | 1.02E-06 |
| CDH6   | -0.130913938 | 0.002915 | 0.005706 |
| CDH7   | 0.148951588  | 0.000696 | 0.001525 |
| CDH8   | -0.06864242  | 0.119757 | 0.166936 |
| CDH9   | -0.015492922 | 0.725771 | 0.777554 |
| CDHR1  | -0.271660448 | 3.65E-10 | 2.16E-09 |
| CDHR2  | 0.088812085  | 0.043952 | 0.068043 |
| CDHR3  | -0.186471147 | 2.05E-05 | 5.86E-05 |
| CDHR4  | -0.219549745 | 4.86E-07 | 1.80E-06 |
| CDHR5  | 0.025571825  | 0.562588 | 0.631866 |
| CDIPT  | -0.261293948 | 1.74E-09 | 9.29E-09 |
| CDK10  | -0.303486677 | 1.96E-12 | 1.64E-11 |
| CDK11A | -0.245366193 | 1.69E-08 | 7.81E-08 |
| CDK11B | -0.206099596 | 2.40E-06 | 7.91E-06 |

|            |              |          |          |
|------------|--------------|----------|----------|
| CDK12      | 0.125385554  | 0.004375 | 0.008299 |
| CDK13      | -0.04215856  | 0.339664 | 0.413749 |
| CDK14      | -0.057709465 | 0.191028 | 0.251782 |
| CDK15      | -0.153700804 | 0.000465 | 0.001048 |
| CDK16      | 0.173387586  | 7.65E-05 | 0.000198 |
| CDK17      | 0.184499779  | 2.52E-05 | 7.07E-05 |
| CDK18      | -0.418797214 | 2.74E-23 | 1.18E-21 |
| CDK19      | -0.214947469 | 8.49E-07 | 3.01E-06 |
| CDK1       | 0.524044698  | 1.15E-37 | 5.59E-35 |
| CDK20      | -0.239501939 | 3.75E-08 | 1.64E-07 |
| CDK2AP1    | 0.207212511  | 2.11E-06 | 7.01E-06 |
| CDK2AP2    | 0.047248556  | 0.284515 | 0.355363 |
| CDK2       | 0.339095966  | 2.53E-15 | 3.30E-14 |
| CDK3       | -0.30050354  | 3.29E-12 | 2.64E-11 |
| CDK4       | 0.265135063  | 9.84E-10 | 5.49E-09 |
| CDK5R1     | 0.186630521  | 2.02E-05 | 5.77E-05 |
| CDK5R2     | 0.146849943  | 0.00083  | 0.00179  |
| CDK5RAP1   | 0.123882387  | 0.004872 | 0.009175 |
| CDK5RAP2   | -0.044471896 | 0.313803 | 0.385987 |
| CDK5RAP3   | -0.288616359 | 2.45E-11 | 1.72E-10 |
| CDK5       | 0.125840263  | 0.004234 | 0.008045 |
| CDK6       | 0.208652822  | 1.79E-06 | 6.02E-06 |
| CDK7       | 0.246084612  | 1.53E-08 | 7.11E-08 |
| CDK8       | 0.376973996  | 7.77E-19 | 1.72E-17 |
| CDK9       | -0.194009124 | 9.24E-06 | 2.78E-05 |
| CDKAL1     | 0.04107413   | 0.352243 | 0.426834 |
| CDKL1      | -0.0746737   | 0.090482 | 0.130058 |
| CDKL2      | -0.362189401 | 2.08E-17 | 3.68E-16 |
| CDKL3      | -0.176048875 | 5.90E-05 | 0.000155 |
| CDKL4      | -0.066998543 | 0.128901 | 0.178117 |
| CDKL5      | -0.130370364 | 0.003036 | 0.005923 |
| CDKN1A     | -0.074226869 | 0.092432 | 0.132478 |
| CDKN1B     | -0.03369933  | 0.445393 | 0.519673 |
| CDKN1C     | -0.180531013 | 3.77E-05 | 0.000103 |
| CDKN2AIPNL | 0.217637491  | 6.14E-07 | 2.23E-06 |
| CDKN2AIP   | -0.024608302 | 0.577405 | 0.644919 |
| CDKN2A     | 0.086294466  | 0.050321 | 0.076991 |
| CDKN2BAS   | -0.025350862 | 0.56597  | 0.634791 |
| CDKN2B     | -0.071310342 | 0.106005 | 0.149687 |
| CDKN2C     | 0.018981684  | 0.667374 | 0.72576  |
| CDKN2D     | 0.131860668  | 0.002716 | 0.005348 |
| CDKN3      | 0.603483893  | 2.08E-52 | 1.38E-48 |
| CDNF       | -0.170259994 | 0.000103 | 0.000262 |
| CDO1       | -0.267674639 | 6.71E-10 | 3.83E-09 |

|           |              |          |          |
|-----------|--------------|----------|----------|
| CDON      | -0.191995457 | 1.15E-05 | 3.41E-05 |
| CDR1      | -0.070313536 | 0.110989 | 0.156009 |
| CDR2L     | 0.052707947  | 0.232456 | 0.298626 |
| CDR2      | 0.086566347  | 0.049598 | 0.075961 |
| CDRT15P   | -0.210149044 | 1.50E-06 | 5.11E-06 |
| CDRT15    | -0.061377893 | 0.164282 | 0.220766 |
| CDRT1     | 0.021305302  | 0.62954  | 0.691653 |
| CDRT4     | -0.213052925 | 1.06E-06 | 3.72E-06 |
| CDS1      | -0.21995428  | 4.62E-07 | 1.72E-06 |
| CDS2      | -0.057461071 | 0.192948 | 0.253978 |
| CDSN      | -0.150608869 | 0.000606 | 0.001339 |
| CDT1      | 0.410607113  | 2.29E-22 | 8.43E-21 |
| CDV3      | 0.162707024  | 0.000209 | 0.000504 |
| CDX1      | 0.048926141  | 0.267742 | 0.337345 |
| CDX2      | 0.136422173  | 0.001916 | 0.003874 |
| CDY2B     | -0.067968352 | 0.123443 | 0.171479 |
| CDYL2     | 0.006345601  | 0.885772 | 0.910388 |
| CDYL      | 0.21197163   | 1.21E-06 | 4.18E-06 |
| CEACAM16  | 0.102614389  | 0.019849 | 0.033106 |
| CEACAM18  | 0.00064391   | 0.98837  | 0.991395 |
| CEACAM19  | 0.124420898  | 0.004688 | 0.008856 |
| CEACAM1   | -0.107068803 | 0.015063 | 0.025779 |
| CEACAM20  | 0.042386703  | 0.337054 | 0.410996 |
| CEACAM21  | -0.228643657 | 1.56E-07 | 6.21E-07 |
| CEACAM22P | 0.045253963  | 0.305361 | 0.377111 |
| CEACAM3   | -0.027488338 | 0.533671 | 0.604992 |
| CEACAM4   | -0.232424336 | 9.56E-08 | 3.95E-07 |
| CEACAM5   | 0.009860077  | 0.823362 | 0.859393 |
| CEACAM6   | -0.181323726 | 3.48E-05 | 9.55E-05 |
| CEACAM7   | -0.117523861 | 0.007589 | 0.013785 |
| CEACAM8   | -0.308000116 | 8.86E-13 | 7.82E-12 |
| CEBPA     | -0.348220301 | 3.98E-16 | 5.84E-15 |
| CEBPB     | 0.158070259  | 0.000317 | 0.000736 |
| CEBPD     | -0.142063485 | 0.001227 | 0.002569 |
| CEBPE     | -0.063923842 | 0.147444 | 0.200757 |
| CEBPG     | 0.244914618  | 1.80E-08 | 8.28E-08 |
| CEBPZ     | 0.292368976  | 1.31E-11 | 9.66E-11 |
| CECR1     | -0.269406453 | 5.16E-10 | 2.99E-09 |
| CECR2     | -0.222779954 | 3.26E-07 | 1.24E-06 |
| CECR4     | -0.191821512 | 1.17E-05 | 3.47E-05 |
| CECR5     | 0.103305018  | 0.01903  | 0.031859 |
| CECR6     | -0.193410436 | 9.86E-06 | 2.95E-05 |
| CECR7     | -0.026788088 | 0.54415  | 0.614871 |
| CELA1     | -0.064200652 | 0.145695 | 0.198769 |

|         |              |          |          |
|---------|--------------|----------|----------|
| CELA2A  | 0.003167284  | 0.942839 | 0.954587 |
| CELA2B  | -0.088152203 | 0.045552 | 0.070281 |
| CELA3A  | -0.02045271  | 0.643317 | 0.70396  |
| CELA3B  | -0.060776476 | 0.168463 | 0.225822 |
| CELF1   | -0.110036559 | 0.012467 | 0.02167  |
| CELF2   | -0.381702987 | 2.62E-19 | 6.27E-18 |
| CELF3   | 0.039529178  | 0.370664 | 0.445457 |
| CELF4   | -0.129353071 | 0.003275 | 0.006348 |
| CELF5   | -0.042536752 | 0.335345 | 0.409236 |
| CELF6   | -0.386864385 | 7.84E-20 | 1.99E-18 |
| CELP    | 0.043545339  | 0.324002 | 0.397071 |
| CELSR1  | -0.254807685 | 4.48E-09 | 2.24E-08 |
| CELSR2  | -0.239558717 | 3.72E-08 | 1.63E-07 |
| CELSR3  | 0.089521007  | 0.042286 | 0.065688 |
| CEL     | -0.098356229 | 0.025612 | 0.041735 |
| CEMP1   | -0.362624914 | 1.89E-17 | 3.37E-16 |
| CEND1   | 0.02225577   | 0.614332 | 0.678128 |
| CENPA   | 0.54496671   | 3.58E-41 | 3.58E-38 |
| CENPBD1 | 0.115855759  | 0.008497 | 0.015273 |
| CENPB   | -0.086138746 | 0.050739 | 0.077542 |
| CENPC1  | -0.277188591 | 1.54E-10 | 9.66E-10 |
| CENPE   | 0.445487477  | 1.78E-26 | 1.23E-24 |
| CENPF   | 0.422790296  | 9.54E-24 | 4.36E-22 |
| CENPH   | 0.400670918  | 2.79E-21 | 8.86E-20 |
| CENPI   | 0.471807108  | 6.61E-30 | 7.13E-28 |
| CENPJ   | 0.122051423  | 0.005547 | 0.010338 |
| CENPK   | 0.398171831  | 5.17E-21 | 1.57E-19 |
| CENPL   | 0.479031584  | 6.68E-31 | 8.51E-29 |
| CENPM   | 0.346805255  | 5.32E-16 | 7.69E-15 |
| CENPN   | 0.517179396  | 1.44E-36 | 5.53E-34 |
| CENPO   | 0.454823895  | 1.17E-27 | 9.28E-26 |
| CENPP   | 0.193594405  | 9.66E-06 | 2.90E-05 |
| CENPQ   | 0.317714715  | 1.53E-13 | 1.51E-12 |
| CENPT   | -0.202850961 | 3.47E-06 | 1.12E-05 |
| CENPV   | 0.021202701  | 0.631191 | 0.692972 |
| CENPW   | 0.447500479  | 9.99E-27 | 7.08E-25 |
| CEP110  | -0.287915727 | 2.75E-11 | 1.92E-10 |
| CEP120  | -0.208327475 | 1.85E-06 | 6.24E-06 |
| CEP135  | 0.075089263  | 0.088697 | 0.127803 |
| CEP152  | 0.117413535  | 0.007646 | 0.013878 |
| CEP164  | -0.121373798 | 0.005817 | 0.01079  |
| CEP170L | 0.023884319  | 0.588658 | 0.654914 |
| CEP170  | 0.080592248  | 0.067631 | 0.100379 |
| CEP192  | -0.152125559 | 0.000532 | 0.001187 |

|        |              |          |          |
|--------|--------------|----------|----------|
| CEP250 | -0.024212218 | 0.583549 | 0.650347 |
| CEP290 | -0.08003577  | 0.069555 | 0.102944 |
| CEP350 | -0.05059104  | 0.25178  | 0.319914 |
| CEP55  | 0.543240825  | 7.12E-41 | 6.78E-38 |
| CEP57  | 0.134056771  | 0.002299 | 0.004586 |
| CEP63  | -0.062814117 | 0.154614 | 0.209279 |
| CEP68  | -0.301989628 | 2.55E-12 | 2.08E-11 |
| CEP70  | -0.101144124 | 0.021697 | 0.035897 |
| CEP72  | 0.083701488  | 0.057669 | 0.086956 |
| CEP76  | 0.293419857  | 1.10E-11 | 8.17E-11 |
| CEP78  | 0.299709174  | 3.78E-12 | 3.00E-11 |
| CEP97  | 0.062310201  | 0.157956 | 0.213311 |
| CEPT1  | -0.064122956 | 0.146185 | 0.199286 |
| CER1   | -0.039602791 | 0.369773 | 0.444573 |
| CERCAM | 0.12277234   | 0.005272 | 0.009865 |
| CERKL  | -0.258886051 | 2.48E-09 | 1.29E-08 |
| CERK   | -0.140522441 | 0.001388 | 0.002878 |
| CES1   | -0.158297913 | 0.00031  | 0.000723 |
| CES2   | -0.319282445 | 1.14E-13 | 1.15E-12 |
| CES3   | -0.204325138 | 2.94E-06 | 9.55E-06 |
| CES4   | -0.139329916 | 0.001526 | 0.003142 |
| CES7   | -0.092945396 | 0.03497  | 0.055286 |
| CES8   | -0.325668068 | 3.45E-14 | 3.76E-13 |
| CETN1  | 0.054236431  | 0.219171 | 0.283712 |
| CETN2  | 0.008145755  | 0.853691 | 0.884394 |
| CETN3  | -0.048632177 | 0.270631 | 0.340498 |
| CETN4P | 0.028162682  | 0.523678 | 0.595679 |
| CETP   | -0.064400995 | 0.14444  | 0.197271 |
| CFB    | 0.026084559  | 0.554778 | 0.624305 |
| CFC1B  | -0.118238377 | 0.007228 | 0.013179 |
| CFDP1  | -0.020299075 | 0.645812 | 0.706232 |
| CFD    | -0.273425848 | 2.78E-10 | 1.67E-09 |
| CFHR1  | 0.123992031  | 0.004834 | 0.009111 |
| CFHR2  | 0.120244515  | 0.006294 | 0.011602 |
| CFHR3  | 0.090525993  | 0.040016 | 0.062492 |
| CFHR4  | 0.165019005  | 0.000169 | 0.000414 |
| CFHR5  | 0.148743201  | 0.000709 | 0.00155  |
| CFH    | -0.11117178  | 0.011583 | 0.020283 |
| CFI    | -0.203877496 | 3.09E-06 | 1.00E-05 |
| CFL1   | 0.349980595  | 2.76E-16 | 4.13E-15 |
| CFL2   | 0.195641876  | 7.74E-06 | 2.35E-05 |
| CFLAR  | -0.161130614 | 0.000241 | 0.000573 |
| CFLP1  | -0.248938903 | 1.03E-08 | 4.92E-08 |
| CFP    | -0.292949061 | 1.19E-11 | 8.81E-11 |



|         |              |          |          |
|---------|--------------|----------|----------|
| CFTR    | -0.29665025  | 6.38E-12 | 4.91E-11 |
| CG030   | -0.33079943  | 1.29E-14 | 1.49E-13 |
| CGA     | 0.181467958  | 3.43E-05 | 9.42E-05 |
| CGB1    | 0.106099885  | 0.016008 | 0.027201 |
| CGB2    | -0.042023313 | 0.341217 | 0.415387 |
| CGB5    | -0.005669539 | 0.897871 | 0.9202   |
| CGB7    | -0.26146882  | 1.70E-09 | 9.08E-09 |
| CGB8    | 0.068039041  | 0.123052 | 0.171041 |
| CGB     | 0.039558333  | 0.370311 | 0.445139 |
| CGGBP1  | -0.03222683  | 0.46554  | 0.53937  |
| CGNL1   | -0.475116166 | 2.33E-30 | 2.75E-28 |
| CGN     | -0.195417186 | 7.93E-06 | 2.41E-05 |
| CGREF1  | 0.294803667  | 8.72E-12 | 6.59E-11 |
| CGRRF1  | 0.191007643  | 1.27E-05 | 3.76E-05 |
| CH25H   | -0.317652259 | 1.54E-13 | 1.52E-12 |
| CHAC1   | 0.226257702  | 2.11E-07 | 8.25E-07 |
| CHAC2   | 0.441507376  | 5.56E-26 | 3.61E-24 |
| CHADL   | -0.404853734 | 9.85E-22 | 3.36E-20 |
| CHAD    | -0.405919297 | 7.54E-22 | 2.61E-20 |
| CHAF1A  | 0.250835376  | 7.88E-09 | 3.83E-08 |
| CHAF1B  | 0.293841466  | 1.03E-11 | 7.65E-11 |
| CHAT    | -0.112751779 | 0.010446 | 0.01847  |
| CHCHD10 | 0.128726876  | 0.00343  | 0.006626 |
| CHCHD1  | 0.232200991  | 9.84E-08 | 4.06E-07 |
| CHCHD2  | 0.337823799  | 3.26E-15 | 4.18E-14 |
| CHCHD3  | 0.410027009  | 2.66E-22 | 9.71E-21 |
| CHCHD4  | 0.222132091  | 3.53E-07 | 1.34E-06 |
| CHCHD5  | 0.104069211  | 0.018158 | 0.030525 |
| CHCHD6  | -0.052954173 | 0.230278 | 0.296266 |
| CHCHD7  | 0.11123474   | 0.011536 | 0.020209 |
| CHCHD8  | 0.363420952  | 1.59E-17 | 2.87E-16 |
| CHD1L   | 0.26970437   | 4.93E-10 | 2.86E-09 |
| CHD1    | -0.043094698 | 0.329039 | 0.402499 |
| CHD2    | -0.31012704  | 6.06E-13 | 5.50E-12 |
| CHD3    | -0.175625944 | 6.15E-05 | 0.000161 |
| CHD4    | -0.030823711 | 0.485198 | 0.558859 |
| CHD5    | -0.221452753 | 3.84E-07 | 1.44E-06 |
| CHD6    | -0.205483351 | 2.58E-06 | 8.45E-06 |
| CHD7    | 0.16450631   | 0.000177 | 0.000433 |
| CHD8    | 0.048134217  | 0.275574 | 0.345947 |
| CHD9    | -0.273073472 | 2.94E-10 | 1.76E-09 |
| CHDH    | -0.160649208 | 0.000252 | 0.000597 |
| CHEK1   | 0.468065924  | 2.12E-29 | 2.12E-27 |
| CHEK2   | 0.345038989  | 7.63E-16 | 1.07E-14 |

|            |              |          |          |
|------------|--------------|----------|----------|
| CHERP      | -0.02923187  | 0.508031 | 0.580524 |
| CHFR       | 0.130091995  | 0.0031   | 0.006037 |
| CHGA       | 0.008216109  | 0.852442 | 0.883436 |
| CHGB       | 0.067086534  | 0.128398 | 0.177521 |
| CHI3L1     | -0.187657178 | 1.82E-05 | 5.23E-05 |
| CHI3L2     | -0.194976764 | 8.32E-06 | 2.52E-05 |
| CHIA       | -0.313475948 | 3.32E-13 | 3.13E-12 |
| CHIC1      | -0.238742334 | 4.15E-08 | 1.81E-07 |
| CHIC2      | 0.139657054  | 0.001487 | 0.003066 |
| CHID1      | -0.011797738 | 0.789398 | 0.831059 |
| CHIT1      | -0.28433352  | 4.93E-11 | 3.31E-10 |
| CHKA       | -0.205134248 | 2.68E-06 | 8.76E-06 |
| CHKB-CPT1B | -0.341156389 | 1.67E-15 | 2.24E-14 |
| CHKB       | -0.144247214 | 0.001028 | 0.002183 |
| CHL1       | 0.008413421  | 0.848941 | 0.880658 |
| CHML       | 0.218238641  | 5.70E-07 | 2.09E-06 |
| CHMP1A     | 0.099911597  | 0.023358 | 0.038373 |
| CHMP1B     | 0.173625998  | 7.47E-05 | 0.000194 |
| CHMP2A     | -0.073586595 | 0.095286 | 0.136187 |
| CHMP2B     | 0.205351781  | 2.61E-06 | 8.56E-06 |
| CHMP4A     | 0.16343935   | 0.000195 | 0.000473 |
| CHMP4B     | -0.007664695 | 0.862243 | 0.89164  |
| CHMP4C     | 0.327253586  | 2.55E-14 | 2.83E-13 |
| CHMP5      | 0.282596627  | 6.53E-11 | 4.31E-10 |
| CHMP6      | -0.199413875 | 5.11E-06 | 1.60E-05 |
| CHMP7      | -0.080002827 | 0.06967  | 0.103093 |
| CHM        | 0.062319624  | 0.157893 | 0.213255 |
| CHN1       | 0.052500754  | 0.234299 | 0.300743 |
| CHN2       | -0.239709082 | 3.65E-08 | 1.60E-07 |
| CHODL      | 0.032088341  | 0.46746  | 0.541249 |
| CHORDC1    | 0.404648215  | 1.04E-21 | 3.53E-20 |
| CHP2       | -0.135262548 | 0.002096 | 0.004213 |
| CHPF2      | 0.071917778  | 0.103055 | 0.146069 |
| CHPF       | 0.026471389  | 0.548922 | 0.619214 |
| CHPT1      | 0.007303896  | 0.868668 | 0.897355 |
| CHP        | 0.005077112  | 0.908494 | 0.92842  |
| CHRAC1     | 0.290868055  | 1.69E-11 | 1.22E-10 |
| CHRD1      | -0.376082449 | 9.52E-19 | 2.08E-17 |
| CHRD12     | -0.001033413 | 0.981335 | 0.986121 |
| CHRD       | -0.028135043 | 0.524086 | 0.596041 |
| CHRFAM7A   | -0.082024796 | 0.062878 | 0.094045 |
| CHRM1      | -0.307609849 | 9.50E-13 | 8.35E-12 |
| CHRM2      | -0.146972619 | 0.000822 | 0.001775 |
| CHRM3      | 0.003198677  | 0.942273 | 0.954159 |

|         |              |          |          |
|---------|--------------|----------|----------|
| CHRM4   | 0.007919353  | 0.857714 | 0.887922 |
| CHRM5   | -0.004109207 | 0.925882 | 0.942144 |
| CHRNA10 | -0.268296839 | 6.11E-10 | 3.51E-09 |
| CHRNA1  | -0.080948029 | 0.066424 | 0.098793 |
| CHRNA2  | -0.291368509 | 1.55E-11 | 1.13E-10 |
| CHRNA3  | 0.013565353  | 0.758757 | 0.805419 |
| CHRNA4  | -0.101430999 | 0.021325 | 0.035352 |
| CHRNA5  | 0.302866802  | 2.19E-12 | 1.81E-11 |
| CHRNA6  | -0.230142292 | 1.28E-07 | 5.20E-07 |
| CHRNA7  | -0.08088783  | 0.066627 | 0.099059 |
| CHRNA9  | 0.306526612  | 1.15E-12 | 9.99E-12 |
| CHRNB1  | -0.039034996 | 0.37668  | 0.451465 |
| CHRNB2  | -0.0225554   | 0.609572 | 0.673901 |
| CHRNB3  | -0.288749375 | 2.40E-11 | 1.69E-10 |
| CHRNB4  | 0.117233883  | 0.00774  | 0.014033 |
| CHRND   | 0.025633375  | 0.561648 | 0.631041 |
| CHRNE   | -0.089669066 | 0.041945 | 0.065244 |
| CHRNG   | -0.056157714 | 0.203256 | 0.265852 |
| CHST10  | -0.229536746 | 1.39E-07 | 5.59E-07 |
| CHST11  | 0.161886217  | 0.000225 | 0.000539 |
| CHST12  | -0.152943757 | 0.000496 | 0.001112 |
| CHST13  | -0.030109601 | 0.495372 | 0.568578 |
| CHST14  | -0.107157644 | 0.014979 | 0.025657 |
| CHST15  | 0.023372094  | 0.59668  | 0.66247  |
| CHST1   | 0.145894114  | 0.000898 | 0.001925 |
| CHST2   | -0.179652801 | 4.12E-05 | 0.000112 |
| CHST3   | -0.013219109 | 0.764731 | 0.810684 |
| CHST4   | -0.019848955 | 0.653147 | 0.712887 |
| CHST5   | -0.274652515 | 2.30E-10 | 1.40E-09 |
| CHST6   | -0.010530229 | 0.811575 | 0.849574 |
| CHST7   | -0.222807888 | 3.25E-07 | 1.24E-06 |
| CHST8   | -0.237849971 | 4.68E-08 | 2.02E-07 |
| CHST9   | -0.223322181 | 3.05E-07 | 1.16E-06 |
| CHSY1   | 0.052691521  | 0.232601 | 0.298794 |
| CHSY3   | -0.095754004 | 0.029802 | 0.047895 |
| CHTF18  | 0.003829791  | 0.930909 | 0.945955 |
| CHTF8   | 0.013634721  | 0.757562 | 0.80445  |
| CHUK    | 0.370983674  | 3.00E-18 | 6.05E-17 |
| CHURC1  | 0.072598661  | 0.099827 | 0.142037 |
| CIAO1   | 0.196126754  | 7.34E-06 | 2.24E-05 |
| CIAPIN1 | 0.326288183  | 3.07E-14 | 3.36E-13 |
| CIB1    | 0.050881672  | 0.249062 | 0.316986 |
| CIB2    | 0.177344687  | 5.19E-05 | 0.000138 |
| CIB3    | 0.005989808  | 0.892136 | 0.91559  |

|        |              |          |          |
|--------|--------------|----------|----------|
| CIB4   | 0.080115976  | 0.069275 | 0.102575 |
| CIC    | -0.24646461  | 1.45E-08 | 6.78E-08 |
| CIDEA  | 0.085387329  | 0.052797 | 0.080331 |
| CIDEB  | -0.141195704 | 0.001316 | 0.002738 |
| CIDECP | 0.066789185  | 0.130103 | 0.179667 |
| CIDEC  | 0.163156927  | 0.0002   | 0.000485 |
| CIITA  | -0.414285726 | 8.90E-23 | 3.51E-21 |
| CILP2  | 0.011481092  | 0.794923 | 0.835775 |
| CILP   | -0.01187024  | 0.788135 | 0.829948 |
| CINP   | 0.209867965  | 1.55E-06 | 5.27E-06 |
| CIR1   | -0.111376248 | 0.01143  | 0.020049 |
| CIRBP  | -0.501824713 | 3.35E-34 | 8.27E-32 |
| CIRH1A | 0.324338038  | 4.44E-14 | 4.75E-13 |
| CISD1  | 0.359412894  | 3.78E-17 | 6.46E-16 |
| CISD2  | 0.397031408  | 6.83E-21 | 2.04E-19 |
| CISD3  | -0.008898552 | 0.840344 | 0.873332 |
| CISH   | -0.373251918 | 1.81E-18 | 3.74E-17 |
| CITED1 | -0.105062019 | 0.017077 | 0.028858 |
| CITED2 | -0.35958904  | 3.64E-17 | 6.25E-16 |
| CITED4 | -0.060777297 | 0.168457 | 0.225822 |
| CIT    | -0.091794657 | 0.037298 | 0.058601 |
| CIZ1   | -0.009806034 | 0.824315 | 0.860072 |
| CKAP2L | 0.505558595  | 9.13E-35 | 2.53E-32 |
| CKAP2  | 0.46074296   | 1.99E-28 | 1.72E-26 |
| CKAP4  | 0.359248844  | 3.92E-17 | 6.67E-16 |
| CKAP5  | 0.245574953  | 1.64E-08 | 7.60E-08 |
| CKB    | -0.132428362 | 0.002602 | 0.005137 |
| CKLF   | 0.047051526  | 0.28653  | 0.357504 |
| CKMT1A | 0.063896657  | 0.147616 | 0.200942 |
| CKMT1B | 0.102371366  | 0.020145 | 0.033553 |
| CKMT2  | -0.261583358 | 1.67E-09 | 8.94E-09 |
| CKM    | 0.08476394   | 0.054557 | 0.082788 |
| CKS1B  | 0.499238535  | 8.17E-34 | 1.81E-31 |
| CKS2   | 0.483836776  | 1.41E-31 | 2.09E-29 |
| CLASP1 | -0.106276274 | 0.015832 | 0.026936 |
| CLASP2 | -0.012394735 | 0.779011 | 0.822246 |
| CLCA1  | 0.010321407  | 0.815243 | 0.852744 |
| CLCA2  | -0.136779295 | 0.001864 | 0.003776 |
| CLCA3P | 0.122743513  | 0.005283 | 0.009881 |
| CLCA4  | -0.104634699 | 0.017535 | 0.029555 |
| CLCC1  | -0.261461478 | 1.70E-09 | 9.09E-09 |
| CLCF1  | 0.070848728  | 0.10829  | 0.152634 |
| CLCN1  | -0.010356307 | 0.81463  | 0.852236 |
| CLCN2  | 0.061405015  | 0.164095 | 0.220574 |

|         |              |          |          |
|---------|--------------|----------|----------|
| CLCN3   | 0.043663572  | 0.322689 | 0.395748 |
| CLCN4   | -0.108939588 | 0.013376 | 0.023112 |
| CLCN5   | -0.200480427 | 4.54E-06 | 1.43E-05 |
| CLCN6   | -0.386776464 | 8.01E-20 | 2.03E-18 |
| CLCN7   | -0.255549371 | 4.02E-09 | 2.03E-08 |
| CLCNKA  | -0.270492495 | 4.37E-10 | 2.56E-09 |
| CLCNKB  | -0.224179933 | 2.74E-07 | 1.05E-06 |
| CLC     | -0.030072143 | 0.495909 | 0.569079 |
| CLDN10  | 0.160518702  | 0.000255 | 0.000603 |
| CLDN11  | -0.126131044 | 0.004146 | 0.007894 |
| CLDN12  | 0.255296308  | 4.17E-09 | 2.10E-08 |
| CLDN14  | 0.238927893  | 4.05E-08 | 1.77E-07 |
| CLDN15  | -0.227052735 | 1.91E-07 | 7.51E-07 |
| CLDN16  | -0.252396725 | 6.32E-09 | 3.10E-08 |
| CLDN17  | -0.010694785 | 0.808687 | 0.847038 |
| CLDN18  | -0.292518204 | 1.28E-11 | 9.43E-11 |
| CLDN19  | 0.088606721  | 0.044444 | 0.068737 |
| CLDN1   | -0.177648907 | 5.04E-05 | 0.000134 |
| CLDN20  | -0.212550905 | 1.13E-06 | 3.92E-06 |
| CLDN22  | -0.01426775  | 0.746683 | 0.79522  |
| CLDN23  | -0.291555109 | 1.50E-11 | 1.10E-10 |
| CLDN25  | -0.036158061 | 0.412883 | 0.487576 |
| CLDN2   | -0.226553628 | 2.03E-07 | 7.97E-07 |
| CLDN3   | -0.112929679 | 0.010325 | 0.018276 |
| CLDN4   | -0.114980412 | 0.009011 | 0.016118 |
| CLDN5   | -0.130130438 | 0.003091 | 0.006022 |
| CLDN6   | 0.054527212  | 0.216707 | 0.281123 |
| CLDN7   | 0.079534764  | 0.071325 | 0.105283 |
| CLDN8   | -0.133844661 | 0.002337 | 0.004654 |
| CLDN9   | -0.198498902 | 5.65E-06 | 1.76E-05 |
| CLDND1  | 0.177264058  | 5.23E-05 | 0.000139 |
| CLDND2  | -0.131884774 | 0.002711 | 0.00534  |
| CLEC10A | -0.280976985 | 8.46E-11 | 5.52E-10 |
| CLEC11A | -0.084458418 | 0.055437 | 0.083958 |
| CLEC12A | -0.183022388 | 2.93E-05 | 8.14E-05 |
| CLEC12B | -0.313870226 | 3.09E-13 | 2.92E-12 |
| CLEC14A | -0.290297794 | 1.85E-11 | 1.33E-10 |
| CLEC16A | -0.380650002 | 3.34E-19 | 7.81E-18 |
| CLEC17A | -0.203054962 | 3.40E-06 | 1.09E-05 |
| CLEC18A | -0.15758266  | 0.000331 | 0.000766 |
| CLEC18B | -0.152594047 | 0.000511 | 0.001144 |
| CLEC18C | 0.016567465  | 0.707595 | 0.762078 |
| CLEC1A  | -0.270263611 | 4.53E-10 | 2.64E-09 |
| CLEC1B  | -0.128333903 | 0.00353  | 0.006804 |

|          |              |          |          |
|----------|--------------|----------|----------|
| CLEC2A   | 0.02029319   | 0.645908 | 0.706297 |
| CLEC2B   | -0.060336595 | 0.171571 | 0.229428 |
| CLEC2D   | -0.083939554 | 0.056959 | 0.085996 |
| CLEC2L   | 0.125001991  | 0.004497 | 0.008515 |
| CLEC3A   | -0.149982486 | 0.000639 | 0.001406 |
| CLEC3B   | -0.312178891 | 4.19E-13 | 3.88E-12 |
| CLEC4A   | -0.15810832  | 0.000316 | 0.000734 |
| CLEC4C   | -0.02370783  | 0.591417 | 0.657429 |
| CLEC4D   | 0.064387116  | 0.144527 | 0.197376 |
| CLEC4E   | 0.033213787  | 0.451981 | 0.526345 |
| CLEC4F   | -0.464180745 | 7.00E-29 | 6.54E-27 |
| CLEC4GP1 | -0.200736977 | 4.41E-06 | 1.39E-05 |
| CLEC4G   | 0.011113711  | 0.801346 | 0.840804 |
| CLEC4M   | -0.082539417 | 0.06124  | 0.091869 |
| CLEC5A   | -0.157910383 | 0.000321 | 0.000746 |
| CLEC6A   | 0.061909078  | 0.160655 | 0.216503 |
| CLEC7A   | -0.180215055 | 3.90E-05 | 0.000106 |
| CLEC9A   | -0.310040043 | 6.16E-13 | 5.57E-12 |
| CLECL1   | -0.254457075 | 4.71E-09 | 2.35E-08 |
| CLGN     | 0.183366288  | 2.83E-05 | 7.87E-05 |
| CLIC1    | 0.312574854  | 3.90E-13 | 3.63E-12 |
| CLIC2    | -0.159500685 | 0.000279 | 0.000656 |
| CLIC3    | -0.266937172 | 7.50E-10 | 4.25E-09 |
| CLIC4    | 0.145656731  | 0.000916 | 0.00196  |
| CLIC5    | -0.389214935 | 4.49E-20 | 1.18E-18 |
| CLIC6    | -0.322250512 | 6.57E-14 | 6.84E-13 |
| CLINT1   | -0.154649256 | 0.000428 | 0.000972 |
| CLIP1    | 0.172945864  | 7.98E-05 | 0.000206 |
| CLIP2    | -0.118712151 | 0.006997 | 0.012787 |
| CLIP3    | -0.193564264 | 9.69E-06 | 2.91E-05 |
| CLIP4    | -0.077560616 | 0.078662 | 0.1149   |
| CLK1     | -0.311916724 | 4.40E-13 | 4.05E-12 |
| CLK2P    | -0.049658745 | 0.260635 | 0.329469 |
| CLK2     | -0.158762197 | 0.000298 | 0.000696 |
| CLK3     | -0.121857539 | 0.005623 | 0.010468 |
| CLK4     | -0.421444419 | 1.36E-23 | 6.13E-22 |
| CLLU1OS  | 0.041725892  | 0.344648 | 0.418875 |
| CLLU1    | 0.022186102  | 0.615442 | 0.679113 |
| CLMN     | -0.035009404 | 0.427893 | 0.502481 |
| CLN3     | -0.210729745 | 1.40E-06 | 4.80E-06 |
| CLN5     | -0.179357287 | 4.25E-05 | 0.000115 |
| CLN6     | 0.021954988  | 0.619128 | 0.682389 |
| CLN8     | -0.158286419 | 0.000311 | 0.000724 |
| CLNK     | -0.106651932 | 0.015463 | 0.026374 |

|         |              |          |          |
|---------|--------------|----------|----------|
| CLNS1A  | 0.396539312  | 7.70E-21 | 2.28E-19 |
| CLOCK   | 0.11033612   | 0.012228 | 0.021298 |
| CLP1    | 0.218803243  | 5.32E-07 | 1.96E-06 |
| CLPB    | 0.293228718  | 1.14E-11 | 8.42E-11 |
| CLPP    | 0.083982726  | 0.056831 | 0.085835 |
| CLPS    | 0.003527122  | 0.936357 | 0.949998 |
| CLPTM1L | -0.197596313 | 6.25E-06 | 1.93E-05 |
| CLPTM1  | 0.002774493  | 0.949917 | 0.960878 |
| CLPX    | 0.209516178  | 1.61E-06 | 5.48E-06 |
| CLRN1OS | -0.076973295 | 0.080959 | 0.117876 |
| CLRN1   | -0.084216112 | 0.056144 | 0.084919 |
| CLRN2   | -0.060887153 | 0.167688 | 0.224889 |
| CLRN3   | 0.010477147  | 0.812507 | 0.850267 |
| CLSPN   | 0.360400831  | 3.06E-17 | 5.32E-16 |
| CLSTN1  | -0.081913307 | 0.063238 | 0.094512 |
| CLSTN2  | -0.054619175 | 0.215932 | 0.280226 |
| CLSTN3  | -0.051953627 | 0.239217 | 0.306054 |
| CLTA    | 0.142786435  | 0.001158 | 0.002434 |
| CLTB    | -0.054031437 | 0.220921 | 0.285692 |
| CLTCL1  | 0.042531388  | 0.335406 | 0.409286 |
| CLTC    | 0.088820846  | 0.043931 | 0.068016 |
| CLUAP1  | -0.278201397 | 1.32E-10 | 8.32E-10 |
| CLUL1   | -0.400702388 | 2.77E-21 | 8.80E-20 |
| CLU     | -0.312034468 | 4.30E-13 | 3.97E-12 |
| CLVS1   | 0.020089472  | 0.649224 | 0.709264 |
| CLVS2   | 0.096713649  | 0.028193 | 0.045536 |
| CLYBL   | -0.138937289 | 0.001574 | 0.003228 |
| CMA1    | -0.289918806 | 1.97E-11 | 1.41E-10 |
| CMAH    | -0.325345214 | 3.67E-14 | 3.98E-13 |
| CMAS    | 0.320335836  | 9.40E-14 | 9.55E-13 |
| CMBL    | 0.170284275  | 0.000103 | 0.000262 |
| CMC1    | 0.27122323   | 3.91E-10 | 2.30E-09 |
| CMIP    | 0.067838687  | 0.124162 | 0.172272 |
| CMKLR1  | -0.153903917 | 0.000457 | 0.001031 |
| CMPK1   | 0.068168513  | 0.122339 | 0.170216 |
| CMPK2   | -0.083283098 | 0.058934 | 0.08869  |
| CMTM1   | 0.001575365  | 0.97155  | 0.978551 |
| CMTM2   | -0.077838564 | 0.077593 | 0.11353  |
| CMTM3   | -0.013957204 | 0.752014 | 0.799918 |
| CMTM4   | -0.037526074 | 0.395418 | 0.470333 |
| CMTM5   | -0.288707129 | 2.41E-11 | 1.70E-10 |
| CMTM6   | 0.072225482  | 0.101586 | 0.144232 |
| CMTM7   | -0.302137779 | 2.48E-12 | 2.03E-11 |
| CMTM8   | -0.050025169 | 0.257129 | 0.325862 |

|         |              |          |          |
|---------|--------------|----------|----------|
| CMYA5   | -0.390507356 | 3.30E-20 | 8.90E-19 |
| CN5H6.4 | -0.076089317 | 0.084519 | 0.122418 |
| CNBD1   | 0.044220586  | 0.316548 | 0.388917 |
| CNBP    | 0.190582493  | 1.33E-05 | 3.92E-05 |
| CNDP1   | 0.016242236  | 0.713079 | 0.766586 |
| CNDP2   | -0.135913646 | 0.001993 | 0.004023 |
| CNFN    | -0.098674653 | 0.025136 | 0.04101  |
| CNGA1   | -0.131657917 | 0.002757 | 0.005421 |
| CNGA2   | -0.027347602 | 0.535769 | 0.606843 |
| CNGA3   | -0.023765282 | 0.590518 | 0.65654  |
| CNGA4   | -0.297120888 | 5.89E-12 | 4.55E-11 |
| CNGB1   | -0.033961422 | 0.44186  | 0.516183 |
| CNGB3   | 0.264545473  | 1.07E-09 | 5.95E-09 |
| CNIH2   | -0.005490118 | 0.901087 | 0.922671 |
| CNIH3   | -0.054338894 | 0.218301 | 0.282713 |
| CNIH4   | 0.066960205  | 0.12912  | 0.178408 |
| CNIH    | 0.518008801  | 1.06E-36 | 4.17E-34 |
| CNKSR1  | -0.345478791 | 6.98E-16 | 9.85E-15 |
| CNKSR2  | -0.365550385 | 9.99E-18 | 1.88E-16 |
| CNKSR3  | -0.087607858 | 0.046908 | 0.072167 |
| CNN1    | -0.107748659 | 0.014429 | 0.02478  |
| CNN2    | -0.10386733  | 0.018385 | 0.03087  |
| CNN3    | -0.045461605 | 0.303144 | 0.374884 |
| CNNM1   | -0.15548821  | 0.000398 | 0.000907 |
| CNNM2   | -0.129983159 | 0.003125 | 0.006084 |
| CNNM3   | -0.365367276 | 1.04E-17 | 1.94E-16 |
| CNNM4   | -0.08774932  | 0.046552 | 0.071686 |
| CNOT10  | 0.177054467  | 5.34E-05 | 0.000142 |
| CNOT1   | 0.007206445  | 0.870404 | 0.898917 |
| CNOT2   | 0.173462113  | 7.59E-05 | 0.000197 |
| CNOT3   | -0.045219288 | 0.305732 | 0.377476 |
| CNOT4   | -0.052778088 | 0.231834 | 0.297904 |
| CNOT6L  | -0.160003652 | 0.000267 | 0.000629 |
| CNOT6   | -0.027727217 | 0.53012  | 0.601774 |
| CNOT7   | 0.178028731  | 4.85E-05 | 0.00013  |
| CNOT8   | -0.083195147 | 0.059203 | 0.089034 |
| CNO     | 0.310831796  | 5.34E-13 | 4.87E-12 |
| CNPY1   | -0.042740546 | 0.333033 | 0.406737 |
| CNPY2   | 0.313427794  | 3.34E-13 | 3.15E-12 |
| CNPY3   | -0.042867146 | 0.331602 | 0.405212 |
| CNPY4   | -0.012007992 | 0.785736 | 0.827857 |
| CNP     | 0.095408478  | 0.0304   | 0.048732 |
| CNR1    | -0.353512483 | 1.32E-16 | 2.06E-15 |
| CNR2    | -0.256258785 | 3.63E-09 | 1.84E-08 |



|         |              |          |          |
|---------|--------------|----------|----------|
| CNRIP1  | -0.210431458 | 1.45E-06 | 4.95E-06 |
| CNST    | -0.045244067 | 0.305466 | 0.377195 |
| CNTD1   | -0.269407567 | 5.16E-10 | 2.99E-09 |
| CNTD2   | 0.21560466   | 7.85E-07 | 2.80E-06 |
| CNTFR   | -0.372745205 | 2.02E-18 | 4.17E-17 |
| CNTF    | -0.008208725 | 0.852573 | 0.883469 |
| CNTLN   | -0.077912432 | 0.077311 | 0.113151 |
| CNTN1   | 0.000844193  | 0.984752 | 0.988461 |
| CNTN2   | -0.287546924 | 2.92E-11 | 2.03E-10 |
| CNTN3   | -0.179484151 | 4.19E-05 | 0.000113 |
| CNTN4   | -0.26822801  | 6.17E-10 | 3.54E-09 |
| CNTN5   | 0.011985719  | 0.786123 | 0.828146 |
| CNTN6   | -0.336306722 | 4.40E-15 | 5.52E-14 |
| CNTNAP1 | -0.176601802 | 5.58E-05 | 0.000148 |
| CNTNAP2 | 0.052949616  | 0.230318 | 0.296299 |
| CNTNAP3 | -0.077341981 | 0.079511 | 0.11603  |
| CNTNAP4 | 0.120943827  | 0.005995 | 0.011092 |
| CNTNAP5 | 0.075422281  | 0.087288 | 0.126008 |
| CNTROB  | -0.291538178 | 1.51E-11 | 1.10E-10 |
| COASY   | 0.156457212  | 0.000365 | 0.000839 |
| COBLL1  | -0.302035812 | 2.53E-12 | 2.07E-11 |
| COBL    | -0.136406759 | 0.001919 | 0.003878 |
| COBRA1  | -0.022891267 | 0.604255 | 0.669207 |
| COCH    | 0.247243539  | 1.30E-08 | 6.12E-08 |
| COG1    | -0.092258895 | 0.036343 | 0.057267 |
| COG2    | 0.136251853  | 0.001942 | 0.003924 |
| COG3    | 0.028974501  | 0.511775 | 0.584034 |
| COG4    | -0.105010706 | 0.017131 | 0.02894  |
| COG5    | 0.216913338  | 6.70E-07 | 2.42E-06 |
| COG6    | 0.173706167  | 7.41E-05 | 0.000192 |
| COG7    | -0.21018729  | 1.49E-06 | 5.09E-06 |
| COG8    | -0.054520159 | 0.216767 | 0.281144 |
| COIL    | 0.186150963  | 2.12E-05 | 6.05E-05 |
| COL10A1 | 1.40E-05     | 0.999747 | 0.999963 |
| COL11A1 | 0.264462668  | 1.09E-09 | 6.02E-09 |
| COL11A2 | -0.244621976 | 1.87E-08 | 8.60E-08 |
| COL12A1 | 0.186096075  | 2.14E-05 | 6.08E-05 |
| COL13A1 | -0.314818432 | 2.60E-13 | 2.48E-12 |
| COL14A1 | -0.288346932 | 2.56E-11 | 1.79E-10 |
| COL15A1 | 0.110716093  | 0.011931 | 0.020819 |
| COL16A1 | -0.220037984 | 4.58E-07 | 1.70E-06 |
| COL17A1 | -0.111884751 | 0.011057 | 0.019449 |
| COL18A1 | -0.041325209 | 0.349304 | 0.423839 |
| COL19A1 | -0.28479276  | 4.58E-11 | 3.09E-10 |

|          |              |          |          |
|----------|--------------|----------|----------|
| COL1A1   | 0.115226688  | 0.008863 | 0.015876 |
| COL1A2   | 0.112928198  | 0.010326 | 0.018276 |
| COL20A1  | -0.033197059 | 0.452209 | 0.526519 |
| COL21A1  | -0.38040045  | 3.54E-19 | 8.25E-18 |
| COL22A1  | -0.013046308 | 0.767718 | 0.813203 |
| COL23A1  | -0.199701491 | 4.95E-06 | 1.55E-05 |
| COL24A1  | -0.128656556 | 0.003447 | 0.006657 |
| COL25A1  | 0.066067303  | 0.134316 | 0.184958 |
| COL27A1  | -0.266830017 | 7.63E-10 | 4.32E-09 |
| COL28A1  | -0.208385774 | 1.84E-06 | 6.20E-06 |
| COL29A1  | -0.363753086 | 1.48E-17 | 2.68E-16 |
| COL2A1   | 0.024394906  | 0.580712 | 0.647691 |
| COL3A1   | 0.157760882  | 0.000326 | 0.000755 |
| COL4A1   | 0.079120924  | 0.072815 | 0.107182 |
| COL4A2   | -0.018303053 | 0.67859  | 0.735916 |
| COL4A3BP | -0.312036078 | 4.30E-13 | 3.97E-12 |
| COL4A3   | -0.430687085 | 1.13E-24 | 5.92E-23 |
| COL4A4   | -0.381950099 | 2.48E-19 | 5.94E-18 |
| COL4A5   | -0.130083546 | 0.003102 | 0.00604  |
| COL4A6   | -0.129094663 | 0.003338 | 0.006466 |
| COL5A1   | 0.057366049  | 0.193687 | 0.254765 |
| COL5A2   | 0.179820634  | 4.05E-05 | 0.00011  |
| COL5A3   | 0.072289194  | 0.101284 | 0.143885 |
| COL6A1   | 0.007000642  | 0.874074 | 0.901682 |
| COL6A2   | -0.043897237 | 0.320103 | 0.392867 |
| COL6A3   | -0.015498865 | 0.72567  | 0.777554 |
| COL6A4P2 | -0.226976953 | 1.92E-07 | 7.58E-07 |
| COL6A6   | -0.362957092 | 1.76E-17 | 3.15E-16 |
| COL7A1   | 0.043215162  | 0.327688 | 0.400993 |
| COL8A1   | -0.117627511 | 0.007536 | 0.013692 |
| COL8A2   | -0.189766743 | 1.45E-05 | 4.26E-05 |
| COL9A1   | -0.141746233 | 0.001259 | 0.002632 |
| COL9A2   | -0.337915499 | 3.20E-15 | 4.11E-14 |
| COL9A3   | -0.053775318 | 0.22312  | 0.288134 |
| COLEC10  | -0.101715228 | 0.020962 | 0.034803 |
| COLEC11  | -0.00919347  | 0.835127 | 0.86882  |
| COLEC12  | -0.350686678 | 2.39E-16 | 3.58E-15 |
| COLQ     | -0.323668019 | 5.03E-14 | 5.33E-13 |
| COMMD10  | 0.114877619  | 0.009073 | 0.016223 |
| COMMD1   | 0.102799683  | 0.019627 | 0.032768 |
| COMMD2   | 0.159854143  | 0.00027  | 0.000637 |
| COMMD3   | 0.106123146  | 0.015984 | 0.027168 |
| COMMD4   | 0.015467429  | 0.726204 | 0.777803 |
| COMMD5   | 0.185783423  | 2.21E-05 | 6.26E-05 |

|        |              |          |          |
|--------|--------------|----------|----------|
| COMMD6 | -0.016149315 | 0.714649 | 0.767814 |
| COMMD7 | 0.171856484  | 8.86E-05 | 0.000227 |
| COMMD8 | 0.26204745   | 1.56E-09 | 8.40E-09 |
| COMMD9 | 0.042716946  | 0.3333   | 0.407039 |
| COMP   | -0.093638746 | 0.033628 | 0.053358 |
| COMTD1 | 0.154949344  | 0.000417 | 0.000948 |
| COMT   | -0.076008076 | 0.084852 | 0.122838 |
| COPA   | 0.161978346  | 0.000223 | 0.000535 |
| COPB1  | 0.283184338  | 5.94E-11 | 3.95E-10 |
| COPB2  | 0.280598539  | 8.99E-11 | 5.83E-10 |
| COPE   | 0.113010433  | 0.01027  | 0.018192 |
| COPG2  | 0.108366429  | 0.013874 | 0.023909 |
| COPG   | 0.192583418  | 1.08E-05 | 3.21E-05 |
| COPS2  | 0.252432657  | 6.28E-09 | 3.09E-08 |
| COPS3  | 0.300954763  | 3.05E-12 | 2.46E-11 |
| COPS4  | 0.169720015  | 0.000109 | 0.000275 |
| COPS5  | 0.370243703  | 3.54E-18 | 7.06E-17 |
| COPS6  | 0.285483309  | 4.09E-11 | 2.78E-10 |
| COPS7A | 0.13114758   | 0.002865 | 0.005611 |
| COPS7B | 0.028653922  | 0.516459 | 0.588673 |
| COPS8  | 0.275465092  | 2.02E-10 | 1.24E-09 |
| COPZ1  | 0.371798823  | 2.50E-18 | 5.10E-17 |
| COPZ2  | -0.035052849 | 0.42732  | 0.501925 |
| COQ10A | -0.174822011 | 6.65E-05 | 0.000174 |
| COQ10B | 0.133165358  | 0.002461 | 0.00488  |
| COQ2   | 0.240513804  | 3.27E-08 | 1.45E-07 |
| COQ3   | 0.223444169  | 3.00E-07 | 1.15E-06 |
| COQ4   | -0.19215412  | 1.13E-05 | 3.35E-05 |
| COQ5   | 0.286781447  | 3.31E-11 | 2.28E-10 |
| COQ6   | 0.138031778  | 0.00169  | 0.003453 |
| COQ7   | -0.155792    | 0.000387 | 0.000885 |
| COQ9   | 0.128030244  | 0.00361  | 0.006942 |
| CORIN  | -0.019694248 | 0.655676 | 0.715218 |
| CORO1A | -0.252767599 | 5.99E-09 | 2.96E-08 |
| CORO1B | 0.019644578  | 0.656489 | 0.715909 |
| CORO1C | 0.205408756  | 2.60E-06 | 8.51E-06 |
| CORO2A | -0.19360526  | 9.65E-06 | 2.90E-05 |
| CORO2B | -0.356259574 | 7.41E-17 | 1.21E-15 |
| CORO6  | -0.069792016 | 0.113669 | 0.159496 |
| CORO7  | -0.301309218 | 2.87E-12 | 2.32E-11 |
| CORT   | -0.100410653 | 0.022673 | 0.037348 |
| COTL1  | -0.030649175 | 0.487674 | 0.561014 |
| COX10  | 0.156208575  | 0.000373 | 0.000856 |
| COX11  | 0.07880192   | 0.07398  | 0.10873  |

|         |              |          |          |
|---------|--------------|----------|----------|
| COX15   | 0.228473758  | 1.59E-07 | 6.33E-07 |
| COX16   | 0.206805661  | 2.21E-06 | 7.33E-06 |
| COX17   | 0.165440396  | 0.000162 | 0.000399 |
| COX18   | 0.078334826  | 0.075715 | 0.111139 |
| COX19   | -0.091926751 | 0.037024 | 0.058216 |
| COX4I1  | 0.105286575  | 0.01684  | 0.02849  |
| COX4I2  | -0.243534354 | 2.17E-08 | 9.87E-08 |
| COX4NB  | 0.350319923  | 2.58E-16 | 3.86E-15 |
| COX5A   | 0.293931572  | 1.01E-11 | 7.54E-11 |
| COX5B   | 0.202134085  | 3.77E-06 | 1.20E-05 |
| COX6A1  | 0.262997012  | 1.35E-09 | 7.35E-09 |
| COX6A2  | -0.003273247 | 0.94093  | 0.953427 |
| COX6B1  | 0.186513334  | 2.05E-05 | 5.83E-05 |
| COX6B2  | 0.09396456   | 0.033012 | 0.052457 |
| COX6C   | 0.227922473  | 1.71E-07 | 6.77E-07 |
| COX7A1  | -0.16009393  | 0.000264 | 0.000624 |
| COX7A2L | 0.29536463   | 7.93E-12 | 6.04E-11 |
| COX7A2  | 0.247149896  | 1.32E-08 | 6.19E-08 |
| COX7B2  | 0.187281581  | 1.89E-05 | 5.42E-05 |
| COX7B   | 0.226171639  | 2.13E-07 | 8.32E-07 |
| COX7C   | 0.077349377  | 0.079482 | 0.115996 |
| COX8A   | 0.19597809   | 7.46E-06 | 2.27E-05 |
| COX8C   | 0.051974147  | 0.239032 | 0.305855 |
| CP110   | -0.237308103 | 5.03E-08 | 2.16E-07 |
| CPA1    | -0.042051585 | 0.340892 | 0.415042 |
| CPA2    | 0.057645204  | 0.191524 | 0.252368 |
| CPA3    | -0.306349145 | 1.19E-12 | 1.03E-11 |
| CPA4    | 0.160278467  | 0.00026  | 0.000615 |
| CPA5    | 0.020853996  | 0.636817 | 0.698037 |
| CPA6    | -0.016812663 | 0.703471 | 0.758699 |
| CPAMD8  | -0.488388835 | 3.16E-32 | 5.23E-30 |
| CPB1    | 0.013878728  | 0.753363 | 0.801012 |
| CPB2    | -0.186822935 | 1.98E-05 | 5.66E-05 |
| CPD     | 0.249054746  | 1.01E-08 | 4.85E-08 |
| CPEB1   | -0.174827592 | 6.65E-05 | 0.000174 |
| CPEB2   | -0.018823538 | 0.669981 | 0.727962 |
| CPEB3   | -0.326018696 | 3.23E-14 | 3.53E-13 |
| CPEB4   | -0.287025198 | 3.18E-11 | 2.20E-10 |
| CPE     | 0.287635673  | 2.88E-11 | 2.00E-10 |
| CPLX1   | 0.061725725  | 0.1619   | 0.217902 |
| CPLX2   | 0.228589693  | 1.57E-07 | 6.25E-07 |
| CPLX3   | -0.081942751 | 0.063143 | 0.094394 |
| CPLX4   | 0.104112279  | 0.01811  | 0.030454 |
| CPM     | -0.117902276 | 0.007396 | 0.013463 |

|         |              |          |          |
|---------|--------------|----------|----------|
| CPN1    | 0.222260914  | 3.48E-07 | 1.32E-06 |
| CPN2    | 0.014278827  | 0.746493 | 0.79506  |
| CPNE1   | 0.096720788  | 0.028181 | 0.045525 |
| CPNE2   | -0.372454252 | 2.16E-18 | 4.44E-17 |
| CPNE3   | 0.182004     | 3.25E-05 | 8.95E-05 |
| CPNE4   | -0.057991135 | 0.188868 | 0.249312 |
| CPNE5   | -0.088636924 | 0.044372 | 0.06863  |
| CPNE6   | -0.016613955 | 0.706812 | 0.761405 |
| CPNE7   | -0.124691259 | 0.004599 | 0.008694 |
| CPNE8   | 0.068726046  | 0.119306 | 0.166365 |
| CPNE9   | -0.286184118 | 3.65E-11 | 2.50E-10 |
| CPOX    | 0.148295609  | 0.000736 | 0.001604 |
| CPO     | -0.200702258 | 4.42E-06 | 1.40E-05 |
| CPPED1  | -0.091802274 | 0.037282 | 0.058584 |
| CPS1    | 0.309724095  | 6.52E-13 | 5.88E-12 |
| CPSF1   | -0.03161963  | 0.473992 | 0.547702 |
| CPSF2   | 0.393804208  | 1.50E-20 | 4.19E-19 |
| CPSF3L  | -0.168215403 | 0.000125 | 0.000314 |
| CPSF3   | 0.37027489   | 3.52E-18 | 7.03E-17 |
| CPSF4L  | -0.006259345 | 0.887314 | 0.911624 |
| CPSF4   | 0.203230819  | 3.33E-06 | 1.07E-05 |
| CPSF6   | 0.120185904  | 0.006319 | 0.011644 |
| CPSF7   | -0.068895402 | 0.118396 | 0.1652   |
| CPT1A   | 0.04950159   | 0.262148 | 0.331099 |
| CPT1B   | -0.249775319 | 9.15E-09 | 4.40E-08 |
| CPT1C   | 0.095498851  | 0.030242 | 0.048529 |
| CPT2    | -0.142182885 | 0.001215 | 0.002546 |
| CPVL    | -0.218234208 | 5.71E-07 | 2.09E-06 |
| CPXCR1  | -0.05547989  | 0.208772 | 0.272083 |
| CPXM1   | 0.106121418  | 0.015986 | 0.027169 |
| CPXM2   | -0.161284031 | 0.000238 | 0.000566 |
| CPZ     | -0.102889064 | 0.01952  | 0.032603 |
| CP      | -0.009214864 | 0.834749 | 0.868646 |
| CR1L    | 0.049876218  | 0.25855  | 0.32731  |
| CR1     | -0.179577094 | 4.15E-05 | 0.000112 |
| CR2     | -0.176775706 | 5.49E-05 | 0.000145 |
| CRABP1  | 0.144698403  | 0.000991 | 0.002109 |
| CRABP2  | -0.024113237 | 0.585089 | 0.651773 |
| CRADD   | 0.103222381  | 0.019126 | 0.032    |
| CRAMP1L | -0.302448611 | 2.35E-12 | 1.93E-11 |
| CRAT    | -0.132117925 | 0.002663 | 0.005253 |
| CRB1    | -0.122147368 | 0.005509 | 0.010273 |
| CRB2    | -0.232101154 | 9.97E-08 | 4.10E-07 |
| CRB3    | -0.148025403 | 0.000753 | 0.001638 |

|          |              |          |          |
|----------|--------------|----------|----------|
| CRBN     | -0.107860608 | 0.014327 | 0.024622 |
| CRCP     | 0.16232181   | 0.000216 | 0.00052  |
| CRCT1    | 0.019556137  | 0.657937 | 0.717136 |
| CREB1    | -0.090474654 | 0.040129 | 0.062649 |
| CREB3L1  | -0.142410568 | 0.001193 | 0.002503 |
| CREB3L2  | 0.05209728   | 0.237919 | 0.304607 |
| CREB3L3  | 0.002274908  | 0.958927 | 0.968521 |
| CREB3L4  | 0.083642664  | 0.057846 | 0.087183 |
| CREB3    | 0.115081406  | 0.00895  | 0.016023 |
| CREB5    | -0.103272204 | 0.019068 | 0.031913 |
| CREBBP   | -0.259953296 | 2.12E-09 | 1.12E-08 |
| CREBL2   | -0.196884919 | 6.75E-06 | 2.07E-05 |
| CREBZF   | -0.14092578  | 0.001344 | 0.002792 |
| CREG1    | -0.051764994 | 0.24093  | 0.308031 |
| CREG2    | 0.241848002  | 2.73E-08 | 1.22E-07 |
| CRELD1   | -0.179872289 | 4.03E-05 | 0.000109 |
| CRELD2   | 0.016642835  | 0.706326 | 0.76116  |
| CREM     | 0.262007436  | 1.57E-09 | 8.44E-09 |
| CRHBP    | -0.268102574 | 6.29E-10 | 3.60E-09 |
| CRHR1    | -0.092153401 | 0.036558 | 0.057542 |
| CRHR2    | -0.066414802 | 0.132275 | 0.182376 |
| CRH      | -0.015135054 | 0.731859 | 0.782853 |
| CRIM1    | -0.164546042 | 0.000176 | 0.000431 |
| CRIP1    | -0.001443833 | 0.973925 | 0.980417 |
| CRIP2    | -0.123343363 | 0.005063 | 0.009504 |
| CRIP3    | -0.027653261 | 0.531218 | 0.602747 |
| CRIPAK   | -0.175248296 | 6.38E-05 | 0.000167 |
| CRIPT    | 0.296262215  | 6.81E-12 | 5.23E-11 |
| CRISP1   | 0.008928169  | 0.83982  | 0.872878 |
| CRISP2   | -0.095269581 | 0.030643 | 0.049078 |
| CRISP3   | 0.009996356  | 0.820962 | 0.85729  |
| CRISPLD1 | -0.092948989 | 0.034963 | 0.055279 |
| CRISPLD2 | 0.012254382  | 0.781449 | 0.824297 |
| CRKL     | 0.071775646  | 0.103739 | 0.146831 |
| CRK      | 0.122265305  | 0.005464 | 0.010196 |
| CRLF1    | -0.0527888   | 0.231739 | 0.29782  |
| CRLF2    | -0.059472652 | 0.177799 | 0.236765 |
| CRLF3    | 0.048544383  | 0.271498 | 0.341453 |
| CRLS1    | -0.084024583 | 0.056707 | 0.085687 |
| CRMP1    | -0.188367762 | 1.69E-05 | 4.88E-05 |
| CRNKL1   | 0.137648291  | 0.001742 | 0.003547 |
| CRNN     | 0.004321772  | 0.92206  | 0.938972 |
| CROCCL1  | -0.347518964 | 4.59E-16 | 6.69E-15 |
| CROCCL2  | -0.432612166 | 6.67E-25 | 3.67E-23 |

|        |              |          |          |
|--------|--------------|----------|----------|
| CROCC  | -0.412453036 | 1.43E-22 | 5.39E-21 |
| CROT   | -0.179788938 | 4.07E-05 | 0.00011  |
| CRP    | 0.114651695  | 0.009211 | 0.01646  |
| CRTAC1 | -0.348051397 | 4.12E-16 | 6.03E-15 |
| CRTAM  | -0.122674945 | 0.005308 | 0.009924 |
| CRTAP  | -0.129910218 | 0.003142 | 0.006113 |
| CRTC1  | -0.327791816 | 2.30E-14 | 2.57E-13 |
| CRTC2  | -0.065156983 | 0.139777 | 0.191557 |
| CRTC3  | -0.089929982 | 0.041349 | 0.064413 |
| CRX    | -0.021656139 | 0.623908 | 0.686682 |
| CRY1   | 0.175451779  | 6.25E-05 | 0.000164 |
| CRY2   | -0.509665008 | 2.14E-35 | 6.70E-33 |
| CRYAA  | 0.068219823  | 0.122058 | 0.169836 |
| CRYAB  | -0.039397411 | 0.372262 | 0.447055 |
| CRYBA1 | -0.055424912 | 0.209225 | 0.272584 |
| CRYBA2 | 0.134965167  | 0.002144 | 0.004304 |
| CRYBA4 | -0.104336536 | 0.017861 | 0.030059 |
| CRYBB1 | -0.087355075 | 0.047549 | 0.073036 |
| CRYBB2 | -0.083680751 | 0.057731 | 0.087035 |
| CRYBB3 | -0.171264643 | 9.38E-05 | 0.00024  |
| CRYBG3 | -0.134475438 | 0.002227 | 0.004454 |
| CRYGA  | -0.003544217 | 0.93605  | 0.949825 |
| CRYGB  | 0.079929552  | 0.069927 | 0.103388 |
| CRYGC  | 0.098684513  | 0.025121 | 0.040993 |
| CRYGD  | 0.039099178  | 0.375896 | 0.450717 |
| CRYGN  | -0.076025251 | 0.084782 | 0.122754 |
| CRYGS  | -0.310563668 | 5.61E-13 | 5.11E-12 |
| CRYL1  | -0.079628185 | 0.070992 | 0.104823 |
| CRYM   | -0.32826218  | 2.10E-14 | 2.36E-13 |
| CRYZL1 | -0.111227341 | 0.011542 | 0.020217 |
| CRYZ   | -0.03413452  | 0.439535 | 0.513858 |
| CSAD   | -0.346156193 | 6.07E-16 | 8.67E-15 |
| CSAG1  | 0.194891319  | 8.40E-06 | 2.54E-05 |
| CSAG2  | 0.148003324  | 0.000754 | 0.00164  |
| CSAG3  | 0.198665816  | 5.55E-06 | 1.73E-05 |
| CSDAP1 | 0.15418104   | 0.000446 | 0.001009 |
| CSDA   | 0.105025427  | 0.017116 | 0.028916 |
| CSDC2  | -0.242444036 | 2.52E-08 | 1.14E-07 |
| CSDE1  | -0.015494443 | 0.725745 | 0.777554 |
| CSE1L  | 0.450491434  | 4.19E-27 | 3.11E-25 |
| CSF1R  | -0.229035693 | 1.48E-07 | 5.93E-07 |
| CSF1   | -0.22932709  | 1.43E-07 | 5.73E-07 |
| CSF2RA | -0.179736057 | 4.09E-05 | 0.000111 |
| CSF2RB | -0.222046701 | 3.57E-07 | 1.35E-06 |

|            |              |          |          |
|------------|--------------|----------|----------|
| CSF2       | -0.133907704 | 0.002325 | 0.004634 |
| CSF3R      | -0.246398637 | 1.46E-08 | 6.83E-08 |
| CSF3       | 0.007678063  | 0.862005 | 0.89151  |
| CSGALNACT1 | 0.143836205  | 0.001063 | 0.00225  |
| CSGALNACT2 | -0.047763514 | 0.279292 | 0.349824 |
| CSH1       | 0.029079861  | 0.510241 | 0.582596 |
| CSH2       | 0.029144522  | 0.5093   | 0.581808 |
| CSK        | -0.091146746 | 0.038666 | 0.060558 |
| CSMD1      | -0.143160609 | 0.001123 | 0.002367 |
| CSMD2      | 0.052154982  | 0.237399 | 0.304096 |
| CSMD3      | 0.039702745  | 0.368565 | 0.443254 |
| CSN1S1     | 0.018950501  | 0.667888 | 0.726042 |
| CSN2       | 0.086559946  | 0.049615 | 0.075981 |
| CSN3       | -0.108354389 | 0.013885 | 0.023925 |
| CSNK1A1L   | 0.058855232  | 0.182352 | 0.241781 |
| CSNK1A1P   | 0.028822928  | 0.513987 | 0.586391 |
| CSNK1A1    | -0.013488237 | 0.760087 | 0.806702 |
| CSNK1D     | -0.143127334 | 0.001126 | 0.002373 |
| CSNK1E     | 0.14321278   | 0.001118 | 0.002359 |
| CSNK1G1    | 0.020344998  | 0.645066 | 0.70557  |
| CSNK1G2    | -0.088331239 | 0.045113 | 0.069684 |
| CSNK1G3    | 0.062544237  | 0.156397 | 0.211449 |
| CSNK2A1P   | 0.206162535  | 2.38E-06 | 7.86E-06 |
| CSNK2A1    | 0.211459319  | 1.29E-06 | 4.43E-06 |
| CSNK2A2    | 0.103496509  | 0.018808 | 0.031509 |
| CSNK2B     | 0.204072704  | 3.02E-06 | 9.80E-06 |
| CSPG4PY2   | 0.001855939  | 0.966486 | 0.974334 |
| CSPG4      | -0.047879308 | 0.278127 | 0.348692 |
| CSPG5      | -0.214102136 | 9.39E-07 | 3.32E-06 |
| CSPP1      | 0.06463621   | 0.142976 | 0.195486 |
| CSRNP1     | -0.280798046 | 8.71E-11 | 5.66E-10 |
| CSRNP2     | 0.097465329  | 0.026985 | 0.043763 |
| CSRNP3     | 0.057374332  | 0.193622 | 0.254714 |
| CSRP1      | -0.169970601 | 0.000106 | 0.000269 |
| CSRP2BP    | 0.001022477  | 0.981533 | 0.98622  |
| CSRP2      | 0.200762916  | 4.39E-06 | 1.39E-05 |
| CSRP3      | 0.070622468  | 0.109425 | 0.154081 |
| CST11      | -0.012398556 | 0.778944 | 0.822219 |
| CST1       | -0.039195271 | 0.374723 | 0.44955  |
| CST2       | -0.121449325 | 0.005786 | 0.010737 |
| CST3       | -0.249446392 | 9.58E-09 | 4.60E-08 |
| CST4       | -0.006964359 | 0.874721 | 0.902197 |
| CST5       | -0.367651722 | 6.30E-18 | 1.21E-16 |
| CST6       | -0.078261274 | 0.075991 | 0.111496 |



|         |              |          |          |
|---------|--------------|----------|----------|
| CST7    | -0.079269915 | 0.072276 | 0.106545 |
| CST9L   | 0.090618345  | 0.039812 | 0.062192 |
| CST9    | 0.068019945  | 0.123158 | 0.171152 |
| CSTA    | -0.091012282 | 0.038955 | 0.060954 |
| CSTB    | 0.067358943  | 0.126851 | 0.175613 |
| CSTF1   | 0.22111811   | 4.01E-07 | 1.50E-06 |
| CSTF2T  | 0.054877687  | 0.213763 | 0.277737 |
| CSTF2   | 0.294035651  | 9.93E-12 | 7.42E-11 |
| CSTF3   | 0.329397084  | 1.69E-14 | 1.93E-13 |
| CSTL1   | 0.038667747  | 0.38119  | 0.455709 |
| CSTT    | 0.042437261  | 0.336478 | 0.410443 |
| CS      | 0.316786422  | 1.81E-13 | 1.77E-12 |
| CT45A1  | 0.021655624  | 0.623916 | 0.686682 |
| CT45A2  | 0.076922195  | 0.081162 | 0.118137 |
| CT45A3  | 0.06050554   | 0.170372 | 0.227999 |
| CT45A4  | 0.121216239  | 0.005882 | 0.010901 |
| CT45A5  | 0.064748894  | 0.142279 | 0.194626 |
| CT45A6  | 0.043127561  | 0.32867  | 0.402072 |
| CT47A11 | 0.054342716  | 0.218268 | 0.28269  |
| CT47A1  | 0.020549904  | 0.64174  | 0.702547 |
| CT47A2  | 0.022059135  | 0.617465 | 0.680932 |
| CT47A6  | 0.055974129  | 0.20474  | 0.267543 |
| CT47B1  | 0.028616513  | 0.517006 | 0.589197 |
| CT62    | -0.159162377 | 0.000287 | 0.000674 |
| CTAG1B  | 0.134438491  | 0.002233 | 0.004465 |
| CTAG2   | 0.160604115  | 0.000253 | 0.000599 |
| CTAGE1  | 0.209454586  | 1.63E-06 | 5.51E-06 |
| CTAGE4  | -0.092224733 | 0.036413 | 0.057354 |
| CTAGE5  | 0.242941084  | 2.35E-08 | 1.06E-07 |
| CTAGE6  | -0.090858801 | 0.039287 | 0.061421 |
| CTAGE9  | -0.075147226 | 0.088451 | 0.127493 |
| CTBP1   | -0.101441215 | 0.021312 | 0.035336 |
| CTBP2   | 0.291199157  | 1.60E-11 | 1.16E-10 |
| CTBS    | 0.157663364  | 0.000328 | 0.000761 |
| CTCFL   | 0.170965328  | 9.65E-05 | 0.000246 |
| CTCF    | 0.069311109  | 0.116186 | 0.162548 |
| CTDP1   | -0.084996727 | 0.053894 | 0.081876 |
| CTDSP1  | -0.294940044 | 8.52E-12 | 6.45E-11 |
| CTDSP2  | -0.190630276 | 1.33E-05 | 3.90E-05 |
| CTDSPL2 | 0.192414659  | 1.10E-05 | 3.26E-05 |
| CTDSPL  | -0.359853172 | 3.44E-17 | 5.94E-16 |
| CTF1    | -0.34002401  | 2.10E-15 | 2.77E-14 |
| CTGF    | -0.099742172 | 0.023595 | 0.038715 |
| CTHRC1  | 0.332460447  | 9.34E-15 | 1.11E-13 |

|           |              |          |          |
|-----------|--------------|----------|----------|
| CTH       | 0.160606384  | 0.000253 | 0.000599 |
| CTLA4     | -0.111039006 | 0.011684 | 0.020432 |
| CTNNA1    | -0.067257102 | 0.127428 | 0.176301 |
| CTNNA2    | -0.02606477  | 0.555079 | 0.624608 |
| CTNNA3    | -0.09147235  | 0.037973 | 0.059576 |
| CTNNAL1   | 0.101619443  | 0.021084 | 0.034985 |
| CTNNB1    | 0.031255277  | 0.479104 | 0.552938 |
| CTNNBIP1  | -0.309034677 | 7.37E-13 | 6.59E-12 |
| CTNNBL1   | 0.111834532  | 0.011094 | 0.019504 |
| CTNND1    | -0.045794467 | 0.299614 | 0.371047 |
| CTNND2    | -0.01870503  | 0.671938 | 0.72977  |
| CTNS      | -0.120485157 | 0.006189 | 0.011421 |
| CTPS2     | 0.044815571  | 0.310074 | 0.382125 |
| CTPS      | 0.317473923  | 1.60E-13 | 1.57E-12 |
| CTR9      | -0.072603386 | 0.099805 | 0.142016 |
| CTRB1     | 0.025844203  | 0.558433 | 0.627887 |
| CTRB2     | -0.050262122 | 0.25488  | 0.32336  |
| CTRC      | -0.148274716 | 0.000737 | 0.001607 |
| CTRL      | -0.111428336 | 0.011392 | 0.019991 |
| CTSA      | -0.012945312 | 0.769465 | 0.814672 |
| CTSB      | 0.057963383  | 0.18908  | 0.249529 |
| CTSC      | 0.078957156  | 0.073411 | 0.107988 |
| CTSD      | -0.338637571 | 2.77E-15 | 3.60E-14 |
| CTSE      | -0.221310541 | 3.91E-07 | 1.47E-06 |
| CTSF      | -0.292163171 | 1.36E-11 | 9.98E-11 |
| CTSG      | -0.336835148 | 3.96E-15 | 5.01E-14 |
| CTSH      | -0.478355877 | 8.30E-31 | 1.04E-28 |
| CTSK      | -0.014599458 | 0.741002 | 0.790349 |
| CTSL1     | 0.30389051   | 1.83E-12 | 1.53E-11 |
| CTSL2     | 0.338056481  | 3.11E-15 | 4.01E-14 |
| CTSL3     | 0.04197327   | 0.341792 | 0.416031 |
| CTSO      | -0.329606413 | 1.62E-14 | 1.86E-13 |
| CTSS      | -0.180664204 | 3.72E-05 | 0.000102 |
| CTSW      | -0.139299645 | 0.00153  | 0.003148 |
| CTSZ      | -0.204335175 | 2.94E-06 | 9.54E-06 |
| CTTNBP2NL | -0.099090396 | 0.024526 | 0.040106 |
| CTTNBP2   | -0.302663374 | 2.27E-12 | 1.87E-11 |
| CTTN      | -0.011539548 | 0.793903 | 0.834922 |
| CTU1      | 0.12817173   | 0.003572 | 0.006876 |
| CTU2      | 0.141053639  | 0.001331 | 0.002766 |
| CTXN1     | 0.104934775  | 0.017212 | 0.029052 |
| CTXN2     | -0.033107442 | 0.453431 | 0.527635 |
| CTXN3     | -0.103593985 | 0.018696 | 0.031353 |
| CUBN      | -0.305029517 | 1.50E-12 | 1.27E-11 |

|         |              |          |          |
|---------|--------------|----------|----------|
| CUEDC1  | -0.192473255 | 1.09E-05 | 3.24E-05 |
| CUEDC2  | 0.097386223  | 0.02711  | 0.043937 |
| CUL1    | 0.125708805  | 0.004274 | 0.00812  |
| CUL2    | 0.349158722  | 3.28E-16 | 4.88E-15 |
| CUL3    | 0.002321675  | 0.958083 | 0.967864 |
| CUL4A   | 0.048823325  | 0.26875  | 0.338444 |
| CUL4B   | 0.223373547  | 3.03E-07 | 1.16E-06 |
| CUL5    | 0.084447008  | 0.05547  | 0.083977 |
| CUL7    | -0.069049457 | 0.117573 | 0.164201 |
| CUL9    | -0.370135739 | 3.63E-18 | 7.23E-17 |
| CUTA    | -0.124287506 | 0.004733 | 0.008933 |
| CUTC    | 0.11605346   | 0.008384 | 0.015097 |
| CUX1    | -0.154196969 | 0.000445 | 0.001008 |
| CUX2    | -0.156849126 | 0.000353 | 0.000813 |
| CUZD1   | 0.052998521  | 0.229887 | 0.295859 |
| CWC15   | 0.160331643  | 0.000259 | 0.000612 |
| CWC22   | 0.097028266  | 0.027682 | 0.044784 |
| CWC25   | -0.259319935 | 2.33E-09 | 1.22E-08 |
| CWC27   | 0.120116941  | 0.00635  | 0.011694 |
| CWF19L1 | 0.266423276  | 8.11E-10 | 4.57E-09 |
| CWF19L2 | -0.006652875 | 0.880281 | 0.906215 |
| CWH43   | -0.108463742 | 0.013789 | 0.02378  |
| CX3CL1  | -0.319515891 | 1.09E-13 | 1.11E-12 |
| CX3CR1  | -0.415395852 | 6.68E-23 | 2.69E-21 |
| CXADRP2 | -0.080344164 | 0.068483 | 0.101516 |
| CXADRP3 | -0.038886293 | 0.378502 | 0.453296 |
| CXADR   | -0.102147363 | 0.020421 | 0.033969 |
| CXCL10  | 0.120646583  | 0.00612  | 0.011304 |
| CXCL11  | 0.079777148  | 0.070464 | 0.104133 |
| CXCL12  | -0.198204402 | 5.84E-06 | 1.81E-05 |
| CXCL13  | -0.012801229 | 0.77196  | 0.816572 |
| CXCL14  | -0.210494354 | 1.44E-06 | 4.92E-06 |
| CXCL16  | -0.301339587 | 2.85E-12 | 2.31E-11 |
| CXCL17  | -0.299376613 | 4.00E-12 | 3.16E-11 |
| CXCL1   | 0.040919556  | 0.354059 | 0.428697 |
| CXCL2   | -0.108288236 | 0.013944 | 0.024018 |
| CXCL3   | 0.043316006  | 0.326559 | 0.399832 |
| CXCL5   | 0.252467765  | 6.25E-09 | 3.08E-08 |
| CXCL6   | 0.047284423  | 0.284149 | 0.354973 |
| CXCL9   | 0.024837853  | 0.573859 | 0.641694 |
| CXCR1   | -0.00535358  | 0.903534 | 0.924501 |
| CXCR2P1 | -0.09671831  | 0.028185 | 0.045528 |
| CXCR2   | -0.15836201  | 0.000309 | 0.000719 |
| CXCR3   | -0.121630174 | 0.005713 | 0.010614 |

|          |              |          |          |
|----------|--------------|----------|----------|
| CXCR4    | -0.177581473 | 5.07E-05 | 0.000135 |
| CXCR5    | -0.212614032 | 1.12E-06 | 3.90E-06 |
| CXCR6    | -0.040159122 | 0.363082 | 0.437613 |
| CXCR7    | 0.155611684  | 0.000393 | 0.000898 |
| CXXC1    | -0.127020127 | 0.003886 | 0.007435 |
| CXXC4    | -0.004325238 | 0.921998 | 0.938956 |
| CXXC5    | -0.186118646 | 2.13E-05 | 6.07E-05 |
| CXorf1   | -0.17736154  | 5.18E-05 | 0.000138 |
| CXorf21  | -0.248107922 | 1.15E-08 | 5.47E-08 |
| CXorf22  | -0.243613695 | 2.15E-08 | 9.77E-08 |
| CXorf23  | -0.300718908 | 3.17E-12 | 2.55E-11 |
| CXorf26  | 0.155382591  | 0.000401 | 0.000915 |
| CXorf27  | 0.040880393  | 0.354521 | 0.429126 |
| CXorf30  | -0.276255827 | 1.79E-10 | 1.11E-09 |
| CXorf36  | -0.186582049 | 2.03E-05 | 5.80E-05 |
| CXorf38  | -0.085788687 | 0.051689 | 0.078837 |
| CXorf40A | 0.03904371   | 0.376574 | 0.451365 |
| CXorf40B | 0.152326723  | 0.000523 | 0.001169 |
| CXorf41  | -0.211045556 | 1.35E-06 | 4.64E-06 |
| CXorf42  | -0.293496766 | 1.09E-11 | 8.09E-11 |
| CXorf48  | 0.04798247   | 0.277092 | 0.347612 |
| CXorf49B | -0.05375843  | 0.223266 | 0.288303 |
| CXorf50B | -0.274973496 | 2.18E-10 | 1.34E-09 |
| CXorf51  | 0.069652604  | 0.114394 | 0.160345 |
| CXorf56  | 0.055761138  | 0.206471 | 0.269453 |
| CXorf57  | -0.260348057 | 2.00E-09 | 1.06E-08 |
| CXorf58  | -0.013269433 | 0.763862 | 0.809978 |
| CXorf59  | -0.246528073 | 1.44E-08 | 6.72E-08 |
| CXorf61  | 0.204198068  | 2.98E-06 | 9.68E-06 |
| CXorf64  | -0.174101793 | 7.13E-05 | 0.000186 |
| CXorf65  | -0.222282889 | 3.47E-07 | 1.31E-06 |
| CXorf66  | -8.19E-06    | 0.999852 | 0.999963 |
| CYB561D1 | -0.245029496 | 1.77E-08 | 8.15E-08 |
| CYB561D2 | 0.029154738  | 0.509152 | 0.581684 |
| CYB561   | -0.056919445 | 0.197184 | 0.258855 |
| CYB5A    | -0.236866118 | 5.33E-08 | 2.28E-07 |
| CYB5B    | 0.182604502  | 3.06E-05 | 8.46E-05 |
| CYB5D1   | -0.174007534 | 7.20E-05 | 0.000187 |
| CYB5D2   | -0.212030623 | 1.20E-06 | 4.16E-06 |
| CYB5R1   | -0.241776881 | 2.76E-08 | 1.23E-07 |
| CYB5R2   | -0.139200526 | 0.001542 | 0.003169 |
| CYB5R3   | -0.272393073 | 3.26E-10 | 1.94E-09 |
| CYB5R4   | 0.152111397  | 0.000533 | 0.001189 |
| CYB5RL   | -0.229213564 | 1.45E-07 | 5.80E-07 |

|          |              |          |          |
|----------|--------------|----------|----------|
| CYBASC3  | -0.198497262 | 5.65E-06 | 1.76E-05 |
| CYBA     | -0.038928713 | 0.377982 | 0.452781 |
| CYBB     | -0.160912318 | 0.000246 | 0.000584 |
| CYBRD1   | -0.378244483 | 5.82E-19 | 1.31E-17 |
| CYC1     | 0.366592155  | 7.95E-18 | 1.51E-16 |
| CYCSP52  | -0.118912154 | 0.006901 | 0.012628 |
| CYCS     | 0.476622695  | 1.44E-30 | 1.76E-28 |
| CYFIP1   | 0.044684381  | 0.311494 | 0.383502 |
| CYFIP2   | -0.37118993  | 2.87E-18 | 5.80E-17 |
| CYGB     | -0.207311855 | 2.09E-06 | 6.94E-06 |
| CYHR1    | -0.047063509 | 0.286407 | 0.357414 |
| CYLC1    | 0.004081701  | 0.926377 | 0.942416 |
| CYLC2    | -0.032954525 | 0.455521 | 0.529481 |
| CYLD     | -0.322692007 | 6.05E-14 | 6.32E-13 |
| CYMP     | -0.187501595 | 1.85E-05 | 5.31E-05 |
| CYP11A1  | -0.029694267 | 0.501341 | 0.574291 |
| CYP11B1  | -0.038390443 | 0.384617 | 0.45927  |
| CYP11B2  | -0.014430666 | 0.743891 | 0.792923 |
| CYP17A1  | -0.22448689  | 2.63E-07 | 1.02E-06 |
| CYP19A1  | 0.06340816   | 0.150744 | 0.204747 |
| CYP1A1   | -0.055162809 | 0.21139  | 0.275028 |
| CYP1A2   | -0.183449853 | 2.81E-05 | 7.81E-05 |
| CYP1B1   | -0.086047536 | 0.050985 | 0.077864 |
| CYP20A1  | -0.261627302 | 1.66E-09 | 8.88E-09 |
| CYP21A2  | -0.399639923 | 3.60E-21 | 1.13E-19 |
| CYP24A1  | 0.307019148  | 1.05E-12 | 9.20E-12 |
| CYP26A1  | 0.019324473  | 0.661736 | 0.720531 |
| CYP26B1  | 0.00758452   | 0.86367  | 0.892839 |
| CYP26C1  | -0.040071234 | 0.364134 | 0.438796 |
| CYP27A1  | -0.365248149 | 1.07E-17 | 1.99E-16 |
| CYP27B1  | 0.011770482  | 0.789873 | 0.831384 |
| CYP27C1  | 0.071884473  | 0.103215 | 0.146227 |
| CYP2A13  | -0.174679584 | 6.74E-05 | 0.000176 |
| CYP2A6   | -0.145693256 | 0.000913 | 0.001955 |
| CYP2A7   | -0.074449638 | 0.091456 | 0.131323 |
| CYP2B6   | -0.114540545 | 0.009279 | 0.016575 |
| CYP2B7P1 | -0.375775713 | 1.02E-18 | 2.22E-17 |
| CYP2C18  | -0.078802512 | 0.073978 | 0.10873  |
| CYP2C19  | -0.047175488 | 0.285261 | 0.356184 |
| CYP2C8   | -0.174196248 | 7.07E-05 | 0.000184 |
| CYP2C9   | -0.103955812 | 0.018285 | 0.03072  |
| CYP2D6   | -0.143646602 | 0.00108  | 0.002283 |
| CYP2D7P1 | -0.249365691 | 9.69E-09 | 4.65E-08 |
| CYP2E1   | -0.076794063 | 0.081671 | 0.118749 |

|          |              |          |          |
|----------|--------------|----------|----------|
| CYP2F1   | -0.242287698 | 2.57E-08 | 1.16E-07 |
| CYP2J2   | -0.069789301 | 0.113683 | 0.159505 |
| CYP2R1   | -0.16699643  | 0.00014  | 0.000349 |
| CYP2S1   | -0.238285273 | 4.41E-08 | 1.91E-07 |
| CYP2U1   | -0.323135113 | 5.57E-14 | 5.84E-13 |
| CYP2W1   | -0.11029264  | 0.012262 | 0.021348 |
| CYP39A1  | -0.181705222 | 3.35E-05 | 9.21E-05 |
| CYP3A43  | -0.072216136 | 0.10163  | 0.144264 |
| CYP3A4   | -0.061148802 | 0.165865 | 0.222714 |
| CYP3A5   | -0.077388977 | 0.079328 | 0.115814 |
| CYP3A7   | -0.250226615 | 8.58E-09 | 4.15E-08 |
| CYP46A1  | -0.26071266  | 1.90E-09 | 1.01E-08 |
| CYP4A11  | -0.252737837 | 6.02E-09 | 2.97E-08 |
| CYP4A22  | -0.315789298 | 2.18E-13 | 2.10E-12 |
| CYP4B1   | -0.467196229 | 2.77E-29 | 2.72E-27 |
| CYP4F11  | 0.076362133  | 0.083407 | 0.120965 |
| CYP4F12  | -0.229465321 | 1.40E-07 | 5.64E-07 |
| CYP4F22  | -0.164513919 | 0.000177 | 0.000432 |
| CYP4F2   | 0.110923465  | 0.011772 | 0.020562 |
| CYP4F3   | 0.19259039   | 1.08E-05 | 3.21E-05 |
| CYP4F8   | -0.043930119 | 0.319741 | 0.392494 |
| CYP4V2   | -0.300295664 | 3.41E-12 | 2.73E-11 |
| CYP4X1   | -0.432754117 | 6.42E-25 | 3.54E-23 |
| CYP4Z1   | -0.436891062 | 2.04E-25 | 1.22E-23 |
| CYP4Z2P  | -0.458587517 | 3.81E-28 | 3.16E-26 |
| CYP51A1  | 0.164027182  | 0.000185 | 0.00045  |
| CYP7A1   | -0.274927973 | 2.20E-10 | 1.35E-09 |
| CYP7B1   | -0.110294754 | 0.012261 | 0.021347 |
| CYP8B1   | -0.039002397 | 0.377079 | 0.451862 |
| CYR61    | -0.163844989 | 0.000188 | 0.000457 |
| CYS1     | -0.304502409 | 1.64E-12 | 1.39E-11 |
| CYSLTR1  | -0.269215104 | 5.31E-10 | 3.07E-09 |
| CYSLTR2  | -0.154155644 | 0.000447 | 0.001011 |
| CYTH1    | -0.366522735 | 8.07E-18 | 1.53E-16 |
| CYTH2    | -0.186110965 | 2.13E-05 | 6.07E-05 |
| CYTH3    | -0.2844605   | 4.83E-11 | 3.25E-10 |
| CYTH4    | -0.178624193 | 4.57E-05 | 0.000123 |
| CYTIP    | -0.14802846  | 0.000752 | 0.001638 |
| CYTL1    | -0.024345113 | 0.581484 | 0.648444 |
| CY TSA   | -0.186053204 | 2.15E-05 | 6.10E-05 |
| CY TSB   | 0.17229548   | 8.50E-05 | 0.000218 |
| CYYR1    | -0.238633125 | 4.21E-08 | 1.83E-07 |
| CYorf15A | 0.160915136  | 0.000246 | 0.000584 |
| CYorf15B | 0.109242956  | 0.013119 | 0.022725 |

|         |              |          |          |
|---------|--------------|----------|----------|
| D2HGDH  | -0.264159269 | 1.14E-09 | 6.27E-09 |
| D4S234E | -0.306250337 | 1.21E-12 | 1.04E-11 |
| DAAM1   | -0.001904936 | 0.965602 | 0.973688 |
| DAAM2   | -0.3973622   | 6.30E-21 | 1.88E-19 |
| DAB1    | -0.052906914 | 0.230695 | 0.296707 |
| DAB2IP  | -0.275826697 | 1.91E-10 | 1.18E-09 |
| DAB2    | -0.226626168 | 2.01E-07 | 7.90E-07 |
| DACH1   | -0.290765542 | 1.72E-11 | 1.24E-10 |
| DACH2   | -0.171971092 | 8.77E-05 | 0.000225 |
| DACT1   | 0.065885339  | 0.135394 | 0.186253 |
| DACT2   | -0.111995904 | 0.010977 | 0.019316 |
| DACT3   | -0.177525682 | 5.10E-05 | 0.000136 |
| DAD1L   | -0.119594928 | 0.006584 | 0.012094 |
| DAD1    | 0.348488968  | 3.76E-16 | 5.54E-15 |
| DAG1    | 0.05215338   | 0.237413 | 0.304096 |
| DAGLA   | -0.04774903  | 0.279438 | 0.349963 |
| DAGLB   | -0.230856729 | 1.17E-07 | 4.77E-07 |
| DAK     | -0.057520989 | 0.192484 | 0.253433 |
| DALRD3  | -0.1041137   | 0.018108 | 0.030454 |
| DAND5   | -0.106970499 | 0.015156 | 0.025911 |
| DAO     | -0.152143609 | 0.000531 | 0.001186 |
| DAP3    | 0.300001686  | 3.59E-12 | 2.86E-11 |
| DAPK1   | -0.327549234 | 2.41E-14 | 2.68E-13 |
| DAPK2   | -0.496255256 | 2.26E-33 | 4.66E-31 |
| DAPK3   | -0.063115435 | 0.152642 | 0.206932 |
| DAPL1   | -0.09051614  | 0.040037 | 0.062521 |
| DAPP1   | -0.174400437 | 6.93E-05 | 0.000181 |
| DAP     | -0.046027463 | 0.29716  | 0.368509 |
| DARC    | -0.355668756 | 8.39E-17 | 1.35E-15 |
| DARS2   | 0.471927003  | 6.36E-30 | 6.91E-28 |
| DARS    | 0.422572465  | 1.01E-23 | 4.59E-22 |
| DAXX    | 0.074420262  | 0.091584 | 0.131442 |
| DAZ1    | 0.027221143  | 0.537657 | 0.60843  |
| DAZ2    | 0.033194961  | 0.452237 | 0.526521 |
| DAZ3    | 0.020708462  | 0.639171 | 0.70031  |
| DAZAP1  | 0.080585035  | 0.067656 | 0.100408 |
| DAZAP2  | 0.110917075  | 0.011777 | 0.020569 |
| DAZL    | 0.005442196  | 0.901946 | 0.923334 |
| DBC1    | -0.234434298 | 7.35E-08 | 3.08E-07 |
| DBF4B   | 0.173230721  | 7.76E-05 | 0.000201 |
| DBF4    | 0.5230277    | 1.67E-37 | 7.61E-35 |
| DBH     | -0.2924712   | 1.29E-11 | 9.50E-11 |
| DBI     | 0.021669319  | 0.623697 | 0.686554 |
| DBN1    | 0.20448404   | 2.89E-06 | 9.40E-06 |

|          |              |          |          |
|----------|--------------|----------|----------|
| DBNDD1   | 0.193202732  | 1.01E-05 | 3.02E-05 |
| DBNDD2   | -0.05542589  | 0.209217 | 0.272584 |
| DBNL     | -0.112991856 | 0.010282 | 0.018211 |
| DBP      | -0.368595672 | 5.11E-18 | 9.99E-17 |
| DBR1     | 0.095551569  | 0.030151 | 0.048406 |
| DBT      | -0.026037668 | 0.55549  | 0.625036 |
| DBX1     | -0.002496694 | 0.954926 | 0.965359 |
| DBX2     | 0.070440401  | 0.110345 | 0.155201 |
| DCAF10   | 0.19275447   | 1.06E-05 | 3.16E-05 |
| DCAF11   | -0.180375354 | 3.83E-05 | 0.000104 |
| DCAF12L1 | 0.03430827   | 0.437209 | 0.511557 |
| DCAF12L2 | 0.046949544  | 0.287577 | 0.358538 |
| DCAF12   | 0.07462301   | 0.090701 | 0.130343 |
| DCAF13   | 0.479957475  | 4.96E-31 | 6.44E-29 |
| DCAF15   | -0.14750833  | 0.000786 | 0.001703 |
| DCAF16   | 0.064601376  | 0.143192 | 0.195755 |
| DCAF17   | 0.178637572  | 4.56E-05 | 0.000123 |
| DCAF4L1  | -0.098524741 | 0.025359 | 0.04135  |
| DCAF4L2  | 0.104168883  | 0.018047 | 0.030358 |
| DCAF4    | 0.054520208  | 0.216766 | 0.281144 |
| DCAF5    | -0.195874162 | 7.54E-06 | 2.30E-05 |
| DCAF6    | -0.142949244 | 0.001142 | 0.002405 |
| DCAF7    | 0.001017052  | 0.981631 | 0.986269 |
| DCAF8L1  | 0.078991459  | 0.073286 | 0.107828 |
| DCAF8L2  | 0.121503725  | 0.005764 | 0.0107   |
| DCAF8    | -0.278561522 | 1.24E-10 | 7.89E-10 |
| DCAKD    | -0.221597548 | 3.78E-07 | 1.42E-06 |
| DCBLD1   | -0.036782744 | 0.404852 | 0.479651 |
| DCBLD2   | 0.087319584  | 0.04764  | 0.073158 |
| DCC      | -0.132479161 | 0.002592 | 0.00512  |
| DCDC1    | -0.060544786 | 0.170095 | 0.227735 |
| DCDC2B   | -0.268851653 | 5.61E-10 | 3.24E-09 |
| DCDC2    | -0.11693575  | 0.007899 | 0.014301 |
| DCD      | -0.058981707 | 0.181412 | 0.240759 |
| DCHS1    | -0.157974671 | 0.00032  | 0.000742 |
| DCHS2    | -0.213507784 | 1.01E-06 | 3.54E-06 |
| DCI      | 0.053627658  | 0.224396 | 0.289556 |
| DCK      | 0.282902547  | 6.21E-11 | 4.12E-10 |
| DCLK1    | -0.034996379 | 0.428065 | 0.502624 |
| DCLK2    | -0.291617937 | 1.49E-11 | 1.09E-10 |
| DCLK3    | 0.137392664  | 0.001777 | 0.003613 |
| DCLRE1A  | 0.270895011  | 4.11E-10 | 2.42E-09 |
| DCLRE1B  | 0.13590977   | 0.001994 | 0.004023 |
| DCLRE1C  | 0.093774792  | 0.03337  | 0.052969 |



|         |              |          |          |
|---------|--------------|----------|----------|
| DCN     | -0.195815954 | 7.59E-06 | 2.31E-05 |
| DCP1A   | -0.032278497 | 0.464824 | 0.538666 |
| DCP1B   | -0.2290377   | 1.48E-07 | 5.93E-07 |
| DCP2    | -0.217444634 | 6.28E-07 | 2.28E-06 |
| DCPS    | 0.102337756  | 0.020186 | 0.033601 |
| DCST1   | -0.089597689 | 0.042109 | 0.065459 |
| DCST2   | -0.177196879 | 5.27E-05 | 0.00014  |
| DCTD    | -0.026664289 | 0.546013 | 0.616593 |
| DCTN1   | -0.169451679 | 0.000111 | 0.000282 |
| DCTN2   | 0.23543007   | 6.45E-08 | 2.73E-07 |
| DCTN3   | 0.064869926  | 0.141533 | 0.193725 |
| DCTN4   | -0.097755249 | 0.026531 | 0.043094 |
| DCTN5   | 0.203545698  | 3.21E-06 | 1.04E-05 |
| DCTN6   | 0.12942672   | 0.003257 | 0.006317 |
| DCTPP1  | 0.28968582   | 2.05E-11 | 1.47E-10 |
| DCT     | -0.211909496 | 1.22E-06 | 4.21E-06 |
| DCUN1D1 | 0.259860494  | 2.15E-09 | 1.13E-08 |
| DCUN1D2 | -0.202718872 | 3.53E-06 | 1.13E-05 |
| DCUN1D3 | -0.15909155  | 0.000289 | 0.000678 |
| DCUN1D4 | 0.007241461  | 0.86978  | 0.898412 |
| DCUN1D5 | 0.449497254  | 5.59E-27 | 4.07E-25 |
| DCXR    | -0.080966128 | 0.066363 | 0.09871  |
| DCX     | -0.048968036 | 0.267332 | 0.336892 |
| DDA1    | 0.052173385  | 0.237233 | 0.303943 |
| DDAH1   | -0.261519498 | 1.69E-09 | 9.02E-09 |
| DDAH2   | 0.019244854  | 0.663044 | 0.721758 |
| DDB1    | 0.147339631  | 0.000797 | 0.001725 |
| DDB2    | -0.240027294 | 3.49E-08 | 1.54E-07 |
| DDC     | 0.166533642  | 0.000147 | 0.000363 |
| DDHD1   | -0.008906233 | 0.840208 | 0.873236 |
| DDHD2   | 0.067694731  | 0.124964 | 0.173241 |
| DDI1    | -0.100085978 | 0.023117 | 0.038026 |
| DDI2    | -0.00821549  | 0.852453 | 0.883436 |
| DDIT3   | 0.139353756  | 0.001523 | 0.003137 |
| DDIT4L  | 0.131481726  | 0.002794 | 0.005486 |
| DDIT4   | 0.105554471  | 0.016562 | 0.028069 |
| DDN     | 0.238684842  | 4.18E-08 | 1.82E-07 |
| DDOST   | 0.204540284  | 2.87E-06 | 9.34E-06 |
| DDO     | -0.23914231  | 3.94E-08 | 1.72E-07 |
| DDR1    | -0.235818157 | 6.12E-08 | 2.60E-07 |
| DDR2    | -0.149316684 | 0.000675 | 0.001482 |
| DDRGK1  | -0.139108924 | 0.001553 | 0.003191 |
| DDTL    | -0.031691365 | 0.472989 | 0.546733 |
| DDT     | 0.059140502  | 0.180238 | 0.239486 |

|         |              |             |          |
|---------|--------------|-------------|----------|
| DDX10   | 0.321253816  | 7.92E-14    | 8.13E-13 |
| DDX11L2 | -0.156532465 | 0.000363    | 0.000834 |
| DDX11   | 0.143052265  | 0.001133    | 0.002387 |
| DDX12   | 0.107736736  | 0.01444     | 0.024795 |
| DDX17   | -0.301686251 | 2.68E-12    | 2.18E-11 |
| DDX18   | 0.344464559  | 8.58E-16    | 1.19E-14 |
| DDX19A  | 0.047022179  | 0.286831    | 0.357742 |
| DDX19B  | -0.072097579 | 0.102195    | 0.144935 |
| DDX1    | 0.31845277   | 1.33E-13    | 1.33E-12 |
| DDX20   | 0.102337783  | 0.020186    | 0.033601 |
| DDX21   | 0.390618646  | 3.22E-20    | 8.67E-19 |
| DDX23   | 0.288113548  | 2.66E-11    | 1.86E-10 |
| DDX24   | -0.178869799 | 4.46E-05    | 0.00012  |
| DDX25   | 0.055288237  | 0.210352    | 0.273856 |
| DDX26B  | -0.297867108 | 5.18E-12    | 4.03E-11 |
| DDX27   | 0.170456908  | 0.000101    | 0.000258 |
| DDX28   | 0.079368641  | 0.07192     | 0.106091 |
| DDX31   | -0.023196195 | 0.599446    | 0.664835 |
| DDX39   | 0.336010299  | 4.66E-15    | 5.82E-14 |
| DDX3X   | -0.054220337 | 0.219308    | 0.283853 |
| DDX3Y   | 0.155522939  | 0.000397    | 0.000905 |
| DDX41   | -0.014674911 | 0.739712    | 0.789268 |
| DDX42   | -0.218280566 | 5.67E-07    | 2.08E-06 |
| DDX43   | 0.063975555  | 0.147116    | 0.200378 |
| DDX46   | -0.023443657 | 0.595556    | 0.66159  |
| DDX47   | 0.401653781  | 2.19E-21    | 7.10E-20 |
| DDX49   | 0.107115442  | 0.015019    | 0.025719 |
| DDX4    | -0.021528534 | 0.625954    | 0.68866  |
| DDX50   | 0.287957582  | 2.73E-11    | 1.91E-10 |
| DDX51   | -0.071517552 | 0.104991    | 0.148445 |
| DDX52   | 0.361065774  | 2.65E-17    | 4.64E-16 |
| DDX53   | 0.14280632   | 0.001156    | 0.002431 |
| DDX54   | 0.145038789  | 0.000964    | 0.002055 |
| DDX55   | 0.241039407  | 3.05E-08    | 1.35E-07 |
| DDX56   | 0.263618691  | 1.23E-09    | 6.74E-09 |
| DDX58   | 0.006589743  | 0.881409    | 0.906955 |
| DDX59   | 0.146200692  | 0.000876    | 0.00188  |
| DDX5    | -0.322361887 | 6.44E-14    | 6.71E-13 |
| DDX60L  | -0.073727898 | 0.09465     | 0.135366 |
| DDX60   | -0.058232659 | 0.187029    | 0.247229 |
| DDX6    | -0.086007238 | 0.051094    | 0.078007 |
| DEAF1   | -0.18995484  | 1.43E-05    | 4.18E-05 |
|         | 1-Dec        | 0.010828434 | 0.806343 |
| DECR1   | 0.19664674   | 6.93E-06    | 2.12E-05 |

|            |              |          |          |
|------------|--------------|----------|----------|
| DECR2      | -0.010274242 | 0.816073 | 0.853314 |
| DEDD2      | 0.027377203  | 0.535327 | 0.606549 |
| DEDD       | 0.171247768  | 9.40E-05 | 0.00024  |
| DEF6       | -0.308480782 | 8.14E-13 | 7.23E-12 |
| DEF8       | -0.121755783 | 0.005663 | 0.010533 |
| DEFA1B     | 0.037558301  | 0.395012 | 0.469915 |
| DEFA4      | -0.003289781 | 0.940632 | 0.953222 |
| DEFA5      | 0.121516749  | 0.005759 | 0.010694 |
| DEFA6      | 0.094827653  | 0.031429 | 0.050219 |
| DEFB103B   | 0.191553193  | 1.20E-05 | 3.56E-05 |
| DEFB109P1B | 0.068369836  | 0.121237 | 0.168811 |
| DEFB115    | -0.008742101 | 0.843114 | 0.875801 |
| DEFB118    | 0.027224961  | 0.5376   | 0.6084   |
| DEFB119    | -0.0026943   | 0.951363 | 0.962292 |
| DEFB124    | -0.135264611 | 0.002096 | 0.004213 |
| DEFB125    | 0.055959312  | 0.20486  | 0.267665 |
| DEFB126    | 0.120263977  | 0.006285 | 0.011587 |
| DEFB131    | 0.027487704  | 0.533681 | 0.604992 |
| DEFB132    | 0.05862361   | 0.184082 | 0.2438   |
| DEFB1      | 0.192217828  | 1.12E-05 | 3.33E-05 |
| DEFB4A     | 0.084085773  | 0.056527 | 0.085427 |
| DEGS1      | 0.059499644  | 0.177602 | 0.236519 |
| DEGS2      | -0.157063389 | 0.000346 | 0.000799 |
| DEK        | 0.265082131  | 9.92E-10 | 5.53E-09 |
| DEM1       | -0.067781435 | 0.124481 | 0.172618 |
| DENND1A    | 0.149796748  | 0.000649 | 0.001427 |
| DENND1B    | -0.034233544 | 0.438208 | 0.512457 |
| DENND1C    | -0.344355521 | 8.77E-16 | 1.22E-14 |
| DENND2A    | -0.31053147  | 5.64E-13 | 5.13E-12 |
| DENND2C    | -0.06653491  | 0.131575 | 0.181462 |
| DENND2D    | -0.174648212 | 6.76E-05 | 0.000177 |
| DENND3     | -0.33811502  | 3.07E-15 | 3.97E-14 |
| DENND4A    | -0.08957481  | 0.042161 | 0.06552  |
| DENND4B    | -0.13842284  | 0.001639 | 0.003353 |
| DENND4C    | -0.112745596 | 0.01045  | 0.018475 |
| DENND5A    | -0.110214031 | 0.012325 | 0.021446 |
| DENND5B    | 0.049846752  | 0.258832 | 0.327605 |
| DENR       | 0.495073104  | 3.38E-33 | 6.75E-31 |
| DEPDC1B    | 0.495981588  | 2.48E-33 | 5.01E-31 |
| DEPDC1     | 0.572998306  | 2.84E-46 | 6.30E-43 |
| DEPDC4     | 0.146912943  | 0.000826 | 0.001783 |
| DEPDC5     | -0.228204697 | 1.65E-07 | 6.54E-07 |
| DEPDC6     | -0.200186655 | 4.69E-06 | 1.48E-05 |
| DEPDC7     | 0.077406688  | 0.079259 | 0.11573  |

|         |              |          |          |
|---------|--------------|----------|----------|
| DERA    | 0.36802288   | 5.80E-18 | 1.13E-16 |
| DERL1   | 0.32096433   | 8.36E-14 | 8.55E-13 |
| DERL2   | 0.185022384  | 2.39E-05 | 6.72E-05 |
| DERL3   | -0.084604687 | 0.055014 | 0.083375 |
| DES     | -0.334298489 | 6.53E-15 | 7.97E-14 |
| DET1    | -0.153393055 | 0.000477 | 0.001073 |
| DEXI    | -0.251312747 | 7.36E-09 | 3.60E-08 |
| DFFA    | 0.270222666  | 4.55E-10 | 2.66E-09 |
| DFFB    | -0.115718551 | 0.008576 | 0.015398 |
| DFNA5   | -0.11269749  | 0.010484 | 0.018527 |
| DFNB31  | -0.266921922 | 7.52E-10 | 4.26E-09 |
| DFNB59  | -0.237484878 | 4.91E-08 | 2.11E-07 |
| DGAT1   | -0.106101087 | 0.016006 | 0.027201 |
| DGAT2L6 | 0.013283261  | 0.763623 | 0.809853 |
| DGAT2   | -0.034668563 | 0.432407 | 0.507037 |
| DGCR10  | -0.156262075 | 0.000372 | 0.000852 |
| DGCR11  | -0.048773636 | 0.269238 | 0.338952 |
| DGCR14  | -0.117985386 | 0.007354 | 0.013394 |
| DGCR2   | -0.254042293 | 5.00E-09 | 2.49E-08 |
| DGCR5   | -0.071667275 | 0.104263 | 0.14751  |
| DGCR6L  | -0.173316179 | 7.70E-05 | 0.000199 |
| DGCR6   | -0.223723548 | 2.90E-07 | 1.11E-06 |
| DGCR8   | -0.187301855 | 1.88E-05 | 5.41E-05 |
| DGCR9   | -0.131219731 | 0.002849 | 0.005585 |
| DGKA    | -0.156365307 | 0.000368 | 0.000845 |
| DGKB    | 0.045193254  | 0.30601  | 0.377727 |
| DGKD    | -0.223372933 | 3.03E-07 | 1.16E-06 |
| DGKE    | -0.115249442 | 0.00885  | 0.015855 |
| DGKG    | 0.122014877  | 0.005561 | 0.010361 |
| DGKH    | -0.012300841 | 0.780642 | 0.823532 |
| DGKI    | 0.170689915  | 9.91E-05 | 0.000252 |
| DGKK    | 0.027614844  | 0.531789 | 0.603258 |
| DGKQ    | -0.149530341 | 0.000663 | 0.001458 |
| DGKZ    | -0.079303021 | 0.072156 | 0.106393 |
| DGUOK   | 0.247579417  | 1.24E-08 | 5.86E-08 |
| DHCR24  | -0.19866173  | 5.55E-06 | 1.73E-05 |
| DHCR7   | 0.184710672  | 2.47E-05 | 6.93E-05 |
| DHDDS   | -0.144532326 | 0.001004 | 0.002136 |
| DHDH    | -0.260587501 | 1.93E-09 | 1.02E-08 |
| DHDPSL  | -0.027361019 | 0.535569 | 0.606705 |
| DHFRL1  | -0.152804753 | 0.000502 | 0.001125 |
| DHFR    | 0.229248669  | 1.44E-07 | 5.78E-07 |
| DHH     | -0.216073508 | 7.41E-07 | 2.66E-06 |
| DHODH   | 0.01841418   | 0.676749 | 0.734237 |

|         |              |          |          |
|---------|--------------|----------|----------|
| DHPS    | 0.008143502  | 0.853731 | 0.884394 |
| DHRS11  | -0.075434045 | 0.087238 | 0.125946 |
| DHRS12  | -0.26814101  | 6.25E-10 | 3.59E-09 |
| DHRS13  | -0.051136203 | 0.246699 | 0.314408 |
| DHRS1   | -0.294494518 | 9.19E-12 | 6.92E-11 |
| DHRS2   | 0.04711454   | 0.285884 | 0.356873 |
| DHRS3   | -0.249974528 | 8.89E-09 | 4.29E-08 |
| DHRS4L1 | -0.06147128  | 0.16364  | 0.220036 |
| DHRS4L2 | 0.011077239  | 0.801985 | 0.841297 |
| DHRS4   | -0.026106353 | 0.554448 | 0.624074 |
| DHRS7B  | -0.135002473 | 0.002138 | 0.004293 |
| DHRS7C  | 0.017856164  | 0.686015 | 0.742719 |
| DHRS7   | 0.035526934  | 0.421091 | 0.495717 |
| DHRS9   | -0.104365454 | 0.017829 | 0.030015 |
| DHRSX   | 0.14340552   | 0.001101 | 0.002325 |
| DHTKD1  | 0.117212668  | 0.007752 | 0.014051 |
| DHX15   | 0.226538208  | 2.03E-07 | 7.99E-07 |
| DHX16   | -0.015894226 | 0.718964 | 0.77162  |
| DHX29   | -0.042041612 | 0.341006 | 0.415156 |
| DHX30   | -0.016560989 | 0.707704 | 0.762146 |
| DHX32   | 0.051572477  | 0.242686 | 0.309976 |
| DHX33   | 0.182984231  | 2.94E-05 | 8.17E-05 |
| DHX34   | -0.01368899  | 0.756628 | 0.803647 |
| DHX35   | -0.004809257 | 0.913302 | 0.932238 |
| DHX36   | 0.295955584  | 7.18E-12 | 5.50E-11 |
| DHX37   | 0.242445342  | 2.52E-08 | 1.14E-07 |
| DHX38   | -0.089620642 | 0.042056 | 0.065392 |
| DHX40P1 | 0.020889057  | 0.63625  | 0.697547 |
| DHX40   | -0.110857815 | 0.011822 | 0.020641 |
| DHX57   | 0.16200083   | 0.000223 | 0.000534 |
| DHX58   | -0.343728219 | 9.96E-16 | 1.37E-14 |
| DHX8    | 0.00448958   | 0.919044 | 0.936521 |
| DHX9    | 0.185214702  | 2.34E-05 | 6.60E-05 |
| DIABLO  | 0.364022039  | 1.40E-17 | 2.55E-16 |
| DIAPH1  | -0.029808383 | 0.499697 | 0.572704 |
| DIAPH2  | -0.127316787 | 0.003803 | 0.007285 |
| DIAPH3  | 0.438154702  | 1.43E-25 | 8.77E-24 |
| DICER1  | -0.016129523 | 0.714983 | 0.76804  |
| DIDO1   | -0.26010969  | 2.07E-09 | 1.09E-08 |
| DIMT1L  | 0.232620574  | 9.32E-08 | 3.85E-07 |
| DIO1    | -0.216996509 | 6.63E-07 | 2.40E-06 |
| DIO2    | 0.18873721   | 1.62E-05 | 4.70E-05 |
| DIO3OS  | -0.246403351 | 1.46E-08 | 6.83E-08 |
| DIO3    | -0.181290523 | 3.50E-05 | 9.58E-05 |

|                |              |          |          |
|----------------|--------------|----------|----------|
| DIP2A          | -0.267447599 | 6.95E-10 | 3.96E-09 |
| DIP2B          | 0.192174565  | 1.13E-05 | 3.34E-05 |
| DIP2C          | -0.166165776 | 0.000152 | 0.000375 |
| DIRAS1         | -0.088283854 | 0.045229 | 0.069836 |
| DIRAS2         | -0.075288251 | 0.087853 | 0.126742 |
| DIRAS3         | -0.325893477 | 3.30E-14 | 3.62E-13 |
| DIRC1          | 0.172857089  | 8.05E-05 | 0.000208 |
| DIRC2          | -0.073981117 | 0.093519 | 0.133882 |
| DIRC3          | 0.003243577  | 0.941464 | 0.953679 |
| DIS3L2         | -0.151154563 | 0.000578 | 0.001282 |
| DIS3L          | -0.121364164 | 0.005821 | 0.010795 |
| DIS3           | 0.09532672   | 0.030543 | 0.048937 |
| DISC1          | -0.150936062 | 0.000589 | 0.001304 |
| DISC2          | -0.010875269 | 0.805522 | 0.844448 |
| DISP1          | -0.365300583 | 1.06E-17 | 1.97E-16 |
| DISP2          | -0.000505126 | 0.990876 | 0.993311 |
| DIXDC1         | -0.195763855 | 7.64E-06 | 2.32E-05 |
| DKC1           | 0.470635191  | 9.53E-30 | 1.00E-27 |
| DKFZP434H168   | -0.029358309 | 0.506197 | 0.578958 |
| DKFZP434K028   | -0.052225513 | 0.236764 | 0.30342  |
| DKFZP434L187   | -0.030850557 | 0.484817 | 0.558532 |
| DKFZP586I1420  | -0.263965532 | 1.17E-09 | 6.44E-09 |
| DKFZP686I15217 | -0.235742452 | 6.19E-08 | 2.62E-07 |
| DKFZp434J0226  | -0.073257885 | 0.096778 | 0.138122 |
| DKFZp434L192   | -0.011701027 | 0.791085 | 0.832451 |
| DKFZp566F0947  | -0.065251157 | 0.139204 | 0.19089  |
| DKFZp686A1627  | 0.113348771  | 0.010043 | 0.017826 |
| DKFZp686O24166 | 0.017226636  | 0.696527 | 0.752293 |
| DKFZp761E198   | -0.112273843 | 0.010779 | 0.019008 |
| DKFZp779M0652  | -0.06933262  | 0.116072 | 0.162412 |
| DKK1           | 0.144207623  | 0.001031 | 0.002189 |
| DKK2           | -0.152935826 | 0.000496 | 0.001113 |
| DKK3           | -0.167608106 | 0.000133 | 0.000331 |
| DKK4           | -0.002375795 | 0.957107 | 0.967172 |
| DKKL1          | -0.066812398 | 0.129969 | 0.179507 |
| DLAT           | 0.357898787  | 5.23E-17 | 8.74E-16 |
| DLC1           | -0.425266305 | 4.92E-24 | 2.37E-22 |
| DLD            | 0.298837614  | 4.39E-12 | 3.44E-11 |
| DLEC1          | -0.427565266 | 2.65E-24 | 1.34E-22 |
| DLEU1          | 0.247603128  | 1.24E-08 | 5.84E-08 |
| DLEU2L         | -0.164309832 | 0.00018  | 0.00044  |
| DLEU2          | 0.094145889  | 0.032674 | 0.051998 |
| DLEU7          | -0.010917656 | 0.804779 | 0.84383  |
| DLG1           | -0.03514609  | 0.42609  | 0.500746 |

|         |              |          |          |
|---------|--------------|----------|----------|
| DLG2    | -0.112482861 | 0.010632 | 0.018766 |
| DLG3    | -0.151145044 | 0.000579 | 0.001283 |
| DLG4    | -0.2148008   | 8.64E-07 | 3.06E-06 |
| DLG5    | -0.003378151 | 0.93904  | 0.951947 |
| DLGAP1  | -0.161368392 | 0.000236 | 0.000562 |
| DLGAP2  | -0.265960819 | 8.69E-10 | 4.88E-09 |
| DLGAP3  | -0.115104352 | 0.008936 | 0.016001 |
| DLGAP4  | -0.030375888 | 0.491565 | 0.56484  |
| DLGAP5  | 0.598126416  | 2.78E-51 | 1.11E-47 |
| DLK1    | -0.097357161 | 0.027156 | 0.043997 |
| DLK2    | 0.061944982  | 0.160412 | 0.216234 |
| DLL1    | -0.155315256 | 0.000404 | 0.00092  |
| DLL3    | 0.229996546  | 1.31E-07 | 5.30E-07 |
| DLL4    | -0.0422287   | 0.33886  | 0.412921 |
| DLST    | 0.225172394  | 2.42E-07 | 9.36E-07 |
| DLX1    | 0.079273544  | 0.072262 | 0.106534 |
| DLX2    | 0.144246806  | 0.001028 | 0.002183 |
| DLX3    | -0.302840561 | 2.20E-12 | 1.82E-11 |
| DLX4    | -0.196134574 | 7.33E-06 | 2.24E-05 |
| DLX5    | -0.017651144 | 0.689432 | 0.745893 |
| DLX6AS  | -0.004005702 | 0.927744 | 0.943414 |
| DLX6    | 0.033804393  | 0.443975 | 0.51823  |
| DMAP1   | -0.213246609 | 1.04E-06 | 3.64E-06 |
| DMBT1   | -0.307699646 | 9.35E-13 | 8.23E-12 |
| DMBX1   | -0.028648123 | 0.516543 | 0.588736 |
| DMC1    | 0.148912085  | 0.000699 | 0.00153  |
| DMD     | -0.260608617 | 1.93E-09 | 1.02E-08 |
| DMGDH   | 0.00473229   | 0.914684 | 0.933311 |
| DMKN    | -0.12701919  | 0.003887 | 0.007435 |
| DMP1    | 0.105048492  | 0.017091 | 0.02888  |
| DMPK    | -0.115521335 | 0.00869  | 0.015588 |
| DMRT1   | 0.055572722  | 0.208011 | 0.271232 |
| DMRT2   | -0.275827123 | 1.91E-10 | 1.18E-09 |
| DMRT3   | 0.000194905  | 0.996479 | 0.997577 |
| DMRTA1  | -0.151050132 | 0.000583 | 0.001292 |
| DMRTA2  | -0.102821212 | 0.019601 | 0.03273  |
| DMRTB1  | 0.03640442   | 0.409705 | 0.484423 |
| DMRTC1B | -0.312713157 | 3.81E-13 | 3.55E-12 |
| DMRTC1  | -0.135091443 | 0.002124 | 0.004267 |
| DMRTC2  | 0.09141737   | 0.038089 | 0.059723 |
| DMTF1   | -0.227988286 | 1.69E-07 | 6.71E-07 |
| DMWD    | -0.028931605 | 0.512401 | 0.584681 |
| DMXL1   | -0.304866784 | 1.54E-12 | 1.31E-11 |
| DMXL2   | -0.140131172 | 0.001432 | 0.002961 |

|         |              |          |          |
|---------|--------------|----------|----------|
| DNA2    | 0.393030552  | 1.80E-20 | 5.01E-19 |
| DNAH10  | -0.26690835  | 7.54E-10 | 4.27E-09 |
| DNAH11  | -0.282589301 | 6.53E-11 | 4.32E-10 |
| DNAH12  | -0.286251776 | 3.61E-11 | 2.48E-10 |
| DNAH14  | 0.217317722  | 6.38E-07 | 2.31E-06 |
| DNAH17  | -0.149620912 | 0.000658 | 0.001447 |
| DNAH1   | -0.385182104 | 1.16E-19 | 2.91E-18 |
| DNAH2   | -0.244601111 | 1.88E-08 | 8.62E-08 |
| DNAH3   | -0.125273233 | 0.00441  | 0.008361 |
| DNAH5   | -0.239969872 | 3.52E-08 | 1.55E-07 |
| DNAH6   | -0.374981697 | 1.22E-18 | 2.63E-17 |
| DNAH7   | -0.289402899 | 2.15E-11 | 1.53E-10 |
| DNAH8   | -0.258283834 | 2.71E-09 | 1.40E-08 |
| DNAH9   | -0.274133537 | 2.49E-10 | 1.51E-09 |
| DNAI1   | -0.218844373 | 5.30E-07 | 1.95E-06 |
| DNAI2   | -0.265042845 | 9.98E-10 | 5.55E-09 |
| DNAJA1  | 0.347314494  | 4.79E-16 | 6.96E-15 |
| DNAJA2  | 0.155019871  | 0.000414 | 0.000943 |
| DNAJA3  | 0.175745896  | 6.08E-05 | 0.00016  |
| DNAJA4  | -0.128915619 | 0.003382 | 0.00654  |
| DNAJB11 | 0.26082205   | 1.87E-09 | 9.91E-09 |
| DNAJB12 | -0.102563136 | 0.019911 | 0.033188 |
| DNAJB13 | -0.202194177 | 3.74E-06 | 1.20E-05 |
| DNAJB14 | 0.058457898  | 0.185327 | 0.245157 |
| DNAJB1  | 0.07778116   | 0.077813 | 0.11381  |
| DNAJB2  | -0.266491221 | 8.03E-10 | 4.53E-09 |
| DNAJB3  | 0.102436303  | 0.020066 | 0.033428 |
| DNAJB4  | 0.227392405  | 1.83E-07 | 7.21E-07 |
| DNAJB5  | 0.003593519  | 0.935162 | 0.94906  |
| DNAJB6  | 0.186006353  | 2.16E-05 | 6.12E-05 |
| DNAJB7  | -0.129948242 | 0.003133 | 0.006097 |
| DNAJB8  | -0.049294602 | 0.264151 | 0.333408 |
| DNAJB9  | 0.084014992  | 0.056736 | 0.085711 |
| DNAJC10 | 0.353118706  | 1.44E-16 | 2.23E-15 |
| DNAJC11 | 0.075282906  | 0.087876 | 0.126756 |
| DNAJC12 | 0.135440608  | 0.002067 | 0.004162 |
| DNAJC13 | 0.01017954   | 0.817738 | 0.854548 |
| DNAJC14 | 0.28700027   | 3.19E-11 | 2.21E-10 |
| DNAJC15 | 0.133228047  | 0.002449 | 0.004859 |
| DNAJC16 | -0.070505722 | 0.110014 | 0.154769 |
| DNAJC17 | -0.151108353 | 0.00058  | 0.001286 |
| DNAJC18 | -0.096520953 | 0.02851  | 0.045985 |
| DNAJC19 | 0.059754341  | 0.17575  | 0.234365 |
| DNAJC1  | 0.156085669  | 0.000377 | 0.000864 |



|               |              |          |          |
|---------------|--------------|----------|----------|
| DNAJC21       | -0.021488166 | 0.626602 | 0.689296 |
| DNAJC22       | 0.193033134  | 1.03E-05 | 3.07E-05 |
| DNAJC24       | 0.076487758  | 0.082899 | 0.120342 |
| DNAJC25-GNG10 | 0.109090284  | 0.013248 | 0.022911 |
| DNAJC25       | 0.173626802  | 7.47E-05 | 0.000194 |
| DNAJC27       | -0.344556145 | 8.42E-16 | 1.18E-14 |
| DNAJC28       | -0.282881283 | 6.23E-11 | 4.13E-10 |
| DNAJC2        | 0.278493949  | 1.26E-10 | 7.97E-10 |
| DNAJC30       | -0.05213289  | 0.237598 | 0.304274 |
| DNAJC3        | -0.006661482 | 0.880128 | 0.906113 |
| DNAJC4        | -0.212218862 | 1.18E-06 | 4.07E-06 |
| DNAJC5B       | -0.141663397 | 0.001267 | 0.002647 |
| DNAJC5G       | -0.123124784 | 0.005142 | 0.009643 |
| DNAJC5        | -0.073802794 | 0.094315 | 0.134915 |
| DNAJC6        | 0.102048784  | 0.020543 | 0.034158 |
| DNAJC7        | 0.12260637   | 0.005334 | 0.009972 |
| DNAJC8        | 0.065869802  | 0.135486 | 0.186341 |
| DNAJC9        | 0.423435455  | 8.03E-24 | 3.72E-22 |
| DNAL1         | -0.00127201  | 0.977027 | 0.983027 |
| DNAL4         | -0.130861454 | 0.002927 | 0.005727 |
| DNALI1        | -0.268228642 | 6.17E-10 | 3.54E-09 |
| DNASE1L1      | -0.063298624 | 0.151452 | 0.205611 |
| DNASE1L2      | -0.00844386  | 0.848401 | 0.880234 |
| DNASE1L3      | -0.281582829 | 7.68E-11 | 5.03E-10 |
| DNASE1        | 0.051386641  | 0.24439  | 0.311793 |
| DNASE2B       | -0.27972069  | 1.03E-10 | 6.65E-10 |
| DNASE2        | -0.189801856 | 1.45E-05 | 4.24E-05 |
| DND1          | -0.144669351 | 0.000993 | 0.002113 |
| DNER          | 0.158328457  | 0.00031  | 0.000721 |
| DNHD1         | -0.326372789 | 3.02E-14 | 3.31E-13 |
| DNLZ          | 0.063142862  | 0.152463 | 0.206717 |
| DNM1L         | 0.365191479  | 1.08E-17 | 2.01E-16 |
| DNM1P35       | -0.369268382 | 4.40E-18 | 8.69E-17 |
| DNM1          | -0.019661631 | 0.65621  | 0.71569  |
| DNM2          | -0.28339946  | 5.73E-11 | 3.82E-10 |
| DNM3          | -0.214473797 | 8.99E-07 | 3.18E-06 |
| DNMBP         | 0.040607344  | 0.357747 | 0.432272 |
| DNMT1         | 0.085651252  | 0.052066 | 0.079346 |
| DNMT3A        | 0.163318658  | 0.000197 | 0.000478 |
| DNMT3B        | 0.289067998  | 2.27E-11 | 1.61E-10 |
| DNMT3L        | 0.076141474  | 0.084306 | 0.122144 |
| DNPEP         | 0.06066349   | 0.169257 | 0.22675  |
| DNTTIP1       | 0.135728988  | 0.002022 | 0.004076 |
| DNTTIP2       | 0.321173526  | 8.04E-14 | 8.24E-13 |

|        |              |          |          |
|--------|--------------|----------|----------|
| DNTT   | 0.054768921  | 0.214674 | 0.278793 |
| DOC2A  | -0.19153877  | 1.20E-05 | 3.57E-05 |
| DOC2B  | 0.042172601  | 0.339503 | 0.413578 |
| DOCK10 | -0.294101441 | 9.82E-12 | 7.35E-11 |
| DOCK11 | -0.160118483 | 0.000264 | 0.000623 |
| DOCK1  | -0.153640217 | 0.000467 | 0.001052 |
| DOCK2  | -0.272450933 | 3.23E-10 | 1.93E-09 |
| DOCK3  | -0.151905473 | 0.000542 | 0.001207 |
| DOCK4  | -0.23702823  | 5.22E-08 | 2.24E-07 |
| DOCK5  | 0.032301944  | 0.4645   | 0.538352 |
| DOCK6  | -0.177630437 | 5.04E-05 | 0.000135 |
| DOCK7  | 0.151134961  | 0.000579 | 0.001284 |
| DOCK8  | -0.336385315 | 4.33E-15 | 5.44E-14 |
| DOCK9  | -0.346304844 | 5.89E-16 | 8.44E-15 |
| DOHH   | -0.044304037 | 0.315635 | 0.388002 |
| DOK1   | -0.30819437  | 8.56E-13 | 7.57E-12 |
| DOK2   | -0.23843265  | 4.33E-08 | 1.88E-07 |
| DOK3   | -0.203929429 | 3.07E-06 | 9.96E-06 |
| DOK4   | -0.326354321 | 3.03E-14 | 3.32E-13 |
| DOK5   | -0.098946294 | 0.024736 | 0.040423 |
| DOK6   | -0.195189759 | 8.13E-06 | 2.47E-05 |
| DOK7   | -0.218756344 | 5.35E-07 | 1.97E-06 |
| DOLK   | 0.107191014  | 0.014947 | 0.025608 |
| DOLPP1 | 0.157694179  | 0.000328 | 0.000759 |
| DOM3Z  | -0.107933253 | 0.014262 | 0.024526 |
| DONSON | 0.27681989   | 1.64E-10 | 1.02E-09 |
| DOPEY1 | -0.304599985 | 1.62E-12 | 1.37E-11 |
| DOPEY2 | 0.01004533   | 0.8201   | 0.856524 |
| DOT1L  | -0.108460763 | 0.013791 | 0.023782 |
| DPAGT1 | 0.141277814  | 0.001307 | 0.002722 |
| DPCD   | 0.134567339  | 0.002211 | 0.004424 |
| DPCR1  | -0.319635097 | 1.07E-13 | 1.08E-12 |
| DPEP1  | -0.064063497 | 0.14656  | 0.199702 |
| DPEP2  | -0.381010467 | 3.08E-19 | 7.25E-18 |
| DPEP3  | -0.002139065 | 0.961377 | 0.97041  |
| DPF1   | 0.097946367  | 0.026236 | 0.042666 |
| DPF2   | 0.015664485  | 0.722858 | 0.774926 |
| DPF3   | -0.102038397 | 0.020556 | 0.034177 |
| DPH1   | -0.25866303  | 2.56E-09 | 1.33E-08 |
| DPH2   | 0.210245693  | 1.48E-06 | 5.05E-06 |
| DPH3B  | -0.085076702 | 0.053668 | 0.081557 |
| DPH3   | 0.218024204  | 5.85E-07 | 2.14E-06 |
| DPH5   | 0.225063124  | 2.45E-07 | 9.48E-07 |
| DPM1   | 0.275105759  | 2.14E-10 | 1.31E-09 |

|           |              |          |          |
|-----------|--------------|----------|----------|
| DPM2      | -0.030890002 | 0.484259 | 0.557985 |
| DPM3      | -0.025279347 | 0.567066 | 0.635649 |
| DPP10     | -0.212221258 | 1.17E-06 | 4.07E-06 |
| DPP3      | 0.238156998  | 4.49E-08 | 1.95E-07 |
| DPP4      | -0.225866156 | 2.21E-07 | 8.63E-07 |
| DPP6      | -0.25808137  | 2.79E-09 | 1.44E-08 |
| DPP7      | -0.261896703 | 1.59E-09 | 8.56E-09 |
| DPP8      | 0.084730307  | 0.054653 | 0.082909 |
| DPP9      | 0.053395847  | 0.226408 | 0.291776 |
| DPPA2     | 0.142573069  | 0.001178 | 0.002473 |
| DPPA3     | 0.012531643  | 0.776634 | 0.820213 |
| DPPA4     | 0.030586081  | 0.488571 | 0.561851 |
| DPPA5     | 0.058372014  | 0.185975 | 0.245981 |
| DPRXP4    | -0.221212652 | 3.96E-07 | 1.48E-06 |
| DPRX      | -0.097839305 | 0.026401 | 0.042903 |
| DPT       | -0.101617588 | 0.021086 | 0.034985 |
| DPY19L1   | 0.143940452  | 0.001054 | 0.002232 |
| DPY19L2P1 | -0.042669003 | 0.333844 | 0.407628 |
| DPY19L2P2 | -0.207264339 | 2.10E-06 | 6.98E-06 |
| DPY19L2P4 | -0.178284597 | 4.73E-05 | 0.000127 |
| DPY19L2   | -0.077644554 | 0.078338 | 0.114469 |
| DPY19L3   | -0.147404341 | 0.000793 | 0.001717 |
| DPY19L4   | 0.215987268  | 7.49E-07 | 2.68E-06 |
| DPY30     | 0.222363301  | 3.43E-07 | 1.30E-06 |
| DPYD      | -0.209950194 | 1.53E-06 | 5.22E-06 |
| DPYSL2    | -0.479680503 | 5.42E-31 | 6.99E-29 |
| DPYSL3    | -0.013943416 | 0.752251 | 0.800127 |
| DPYSL4    | -0.029968087 | 0.497401 | 0.570465 |
| DPYSL5    | 0.034940617  | 0.428802 | 0.503371 |
| DPYS      | -0.183446584 | 2.81E-05 | 7.81E-05 |
| DQX1      | 0.054035768  | 0.220884 | 0.28567  |
| DR1       | 0.234207414  | 7.57E-08 | 3.17E-07 |
| DRAM1     | -0.270856269 | 4.13E-10 | 2.43E-09 |
| DRAM2     | 0.021790743  | 0.621753 | 0.684887 |
| DRAP1     | 0.166504497  | 0.000147 | 0.000364 |
| DRD1      | -0.2358176   | 6.13E-08 | 2.60E-07 |
| DRD2      | -0.141256949 | 0.001309 | 0.002726 |
| DRD3      | -0.025362005 | 0.565799 | 0.634635 |
| DRD4      | -0.076367357 | 0.083386 | 0.120952 |
| DRD5      | -0.208092182 | 1.91E-06 | 6.40E-06 |
| DRG1      | 0.336051412  | 4.62E-15 | 5.78E-14 |
| DRG2      | 0.069696161  | 0.114167 | 0.160071 |
| DRGX      | -0.143450723 | 0.001097 | 0.002317 |
| DRP2      | 0.274335636  | 2.41E-10 | 1.47E-09 |

|         |              |          |          |
|---------|--------------|----------|----------|
| DSC1    | 0.085392908  | 0.052782 | 0.08032  |
| DSC2    | 0.189208922  | 1.54E-05 | 4.49E-05 |
| DSC3    | -0.011470159 | 0.795114 | 0.835888 |
| DSCAML1 | -0.23134156  | 1.10E-07 | 4.51E-07 |
| DSCAM   | 0.177977297  | 4.87E-05 | 0.00013  |
| DSCC1   | 0.515632656  | 2.52E-36 | 9.33E-34 |
| DSCR10  | 0.021110658  | 0.632674 | 0.694257 |
| DSCR3   | -0.131712912 | 0.002746 | 0.005402 |
| DSCR4   | 0.041768886  | 0.34415  | 0.418347 |
| DSCR6   | 0.054563861  | 0.216398 | 0.28074  |
| DSCR8   | 0.10606131   | 0.016046 | 0.027259 |
| DSCR9   | -0.000401802 | 0.992742 | 0.994633 |
| DSEL    | -0.063519561 | 0.150026 | 0.20387  |
| DSE     | 0.07565      | 0.086335 | 0.124722 |
| DSG1    | 0.156292795  | 0.000371 | 0.00085  |
| DSG2    | 0.286740991  | 3.33E-11 | 2.30E-10 |
| DSG3    | 0.048536343  | 0.271578 | 0.34151  |
| DSG4    | 0.205623855  | 2.53E-06 | 8.32E-06 |
| DSN1    | 0.270360399  | 4.46E-10 | 2.61E-09 |
| DSPP    | -0.030108583 | 0.495386 | 0.568578 |
| DSP     | 0.228347631  | 1.62E-07 | 6.43E-07 |
| DSTN    | 0.016890263  | 0.702167 | 0.757579 |
| DSTYK   | -0.17457673  | 6.81E-05 | 0.000178 |
| DST     | -0.15056726  | 0.000608 | 0.001343 |
| DTD1    | 0.183472014  | 2.80E-05 | 7.80E-05 |
| DTHD1   | -0.238423825 | 4.33E-08 | 1.88E-07 |
| DTL     | 0.450687816  | 3.95E-27 | 2.96E-25 |
| DTNA    | -0.097894255 | 0.026316 | 0.042775 |
| DTNBP1  | -0.216653546 | 6.91E-07 | 2.49E-06 |
| DTNB    | -0.203389592 | 3.27E-06 | 1.05E-05 |
| DTWD1   | 0.068037452  | 0.123061 | 0.171041 |
| DTWD2   | -0.04469414  | 0.311389 | 0.383395 |
| DTX1    | -0.106677737 | 0.015438 | 0.026334 |
| DTX2    | -0.030451744 | 0.490483 | 0.563759 |
| DTX3L   | 0.050740665  | 0.250378 | 0.31845  |
| DTX3    | -0.327067124 | 2.64E-14 | 2.93E-13 |
| DTX4    | -0.318178824 | 1.40E-13 | 1.39E-12 |
| DTYMK   | 0.401147208  | 2.48E-21 | 7.99E-20 |
| DULLARD | 0.076439308  | 0.083095 | 0.120595 |
| DUOX1   | -0.361922425 | 2.20E-17 | 3.88E-16 |
| DUOX2   | -0.19271977  | 1.06E-05 | 3.17E-05 |
| DUOXA1  | -0.363964526 | 1.41E-17 | 2.57E-16 |
| DUOXA2  | -0.206873763 | 2.19E-06 | 7.28E-06 |
| DUPD1   | -0.097600673 | 0.026772 | 0.043471 |

|          |              |          |          |
|----------|--------------|----------|----------|
| DUS1L    | 0.007051125  | 0.873174 | 0.901074 |
| DUS2L    | 0.016031981  | 0.716633 | 0.769366 |
| DUS3L    | 0.064179501  | 0.145828 | 0.198909 |
| DUS4L    | 0.301678956  | 2.69E-12 | 2.18E-11 |
| DUSP10   | -0.076886169 | 0.081305 | 0.118301 |
| DUSP11   | 0.295714262  | 7.48E-12 | 5.72E-11 |
| DUSP12   | 0.153937358  | 0.000455 | 0.001028 |
| DUSP13   | 0.277253286  | 1.53E-10 | 9.57E-10 |
| DUSP14   | 0.289445394  | 2.14E-11 | 1.52E-10 |
| DUSP15   | -0.223935027 | 2.82E-07 | 1.08E-06 |
| DUSP16   | -0.027799636 | 0.529046 | 0.601033 |
| DUSP18   | -0.206782036 | 2.22E-06 | 7.35E-06 |
| DUSP19   | -0.152645981 | 0.000509 | 0.001139 |
| DUSP1    | -0.199464197 | 5.08E-06 | 1.59E-05 |
| DUSP21   | -0.013938142 | 0.752341 | 0.800181 |
| DUSP22   | -0.243187777 | 2.28E-08 | 1.03E-07 |
| DUSP23   | 0.029038648  | 0.510841 | 0.583134 |
| DUSP26   | -0.351143848 | 2.17E-16 | 3.28E-15 |
| DUSP27   | -0.293093914 | 1.16E-11 | 8.61E-11 |
| DUSP28   | -0.212880638 | 1.09E-06 | 3.79E-06 |
| DUSP2    | -0.140211496 | 0.001423 | 0.002944 |
| DUSP3    | -0.129958517 | 0.003131 | 0.006093 |
| DUSP4    | 0.265281021  | 9.63E-10 | 5.37E-09 |
| DUSP5P   | 0.133145545  | 0.002464 | 0.004887 |
| DUSP5    | 0.041702393  | 0.34492  | 0.419129 |
| DUSP6    | -0.113557722 | 0.009905 | 0.01761  |
| DUSP7    | -0.12775454  | 0.003683 | 0.007072 |
| DUSP8    | -0.249269017 | 9.82E-09 | 4.71E-08 |
| DUSP9    | 0.037512665  | 0.395587 | 0.470459 |
| DUT      | 0.219228656  | 5.05E-07 | 1.87E-06 |
| DUXA     | -0.095777936 | 0.02976  | 0.047837 |
| DVL1     | 0.014880683  | 0.736196 | 0.786399 |
| DVL2     | 0.096485682  | 0.028568 | 0.046072 |
| DVL3     | -0.009910069 | 0.822482 | 0.858563 |
| DVWA     | 0.166486753  | 0.000147 | 0.000365 |
| DYDC1    | -0.14254176  | 0.001181 | 0.002479 |
| DYDC2    | -0.060565749 | 0.169946 | 0.227567 |
| DYM      | 0.187319172  | 1.88E-05 | 5.40E-05 |
| DYNC1H1  | 0.006706718  | 0.87932  | 0.905511 |
| DYNC1I1  | 0.065335734  | 0.138691 | 0.190278 |
| DYNC1I2  | 0.279857504  | 1.01E-10 | 6.52E-10 |
| DYNC1LI1 | 0.18557049   | 2.26E-05 | 6.38E-05 |
| DYNC1LI2 | -0.191571694 | 1.20E-05 | 3.55E-05 |
| DYNC2H1  | -0.335731161 | 4.93E-15 | 6.12E-14 |

|          |              |          |          |
|----------|--------------|----------|----------|
| DYNC2LI1 | -0.189655517 | 1.47E-05 | 4.30E-05 |
| DYNLL1   | 0.46116841   | 1.75E-28 | 1.55E-26 |
| DYNLL2   | -0.203391624 | 3.27E-06 | 1.05E-05 |
| DYNLRB1  | 0.058922702  | 0.18185  | 0.241242 |
| DYNLRB2  | -0.242446344 | 2.52E-08 | 1.14E-07 |
| DYNLT1   | 0.107704707  | 0.01447  | 0.024839 |
| DYNLT3   | 0.115854492  | 0.008498 | 0.015273 |
| DYRK1A   | -0.345836913 | 6.48E-16 | 9.20E-15 |
| DYRK1B   | -0.142957893 | 0.001142 | 0.002404 |
| DYRK2    | 0.076290159  | 0.083699 | 0.121327 |
| DYRK3    | -0.091000688 | 0.03898  | 0.060984 |
| DYRK4    | -0.015880243 | 0.719201 | 0.771755 |
| DYSFIP1  | 0.097231409  | 0.027356 | 0.044293 |
| DYSF     | -0.062170693 | 0.158891 | 0.214414 |
| DYTN     | -0.013440759 | 0.760905 | 0.807399 |
| DYX1C1   | -0.062571498 | 0.156216 | 0.211233 |
| DZIP1L   | -0.193136159 | 1.02E-05 | 3.04E-05 |
| DZIP1    | -0.011652293 | 0.791935 | 0.833159 |
| DZIP3    | -0.220676089 | 4.23E-07 | 1.58E-06 |
| E2F1     | 0.257041663  | 3.24E-09 | 1.65E-08 |
| E2F2     | 0.289908397  | 1.98E-11 | 1.42E-10 |
| E2F3     | 0.266492688  | 8.02E-10 | 4.53E-09 |
| E2F4     | 0.119233141  | 0.00675  | 0.012378 |
| E2F5     | 0.348600068  | 3.68E-16 | 5.42E-15 |
| E2F6     | 0.233203773  | 8.63E-08 | 3.59E-07 |
| E2F7     | 0.336741695  | 4.03E-15 | 5.09E-14 |
| E2F8     | 0.358804906  | 4.31E-17 | 7.28E-16 |
| E4F1     | -0.132932556 | 0.002504 | 0.004961 |
| EAF1     | 0.165408302  | 0.000163 | 0.0004   |
| EAF2     | -0.058905497 | 0.181978 | 0.241349 |
| EAPP     | 0.121546846  | 0.005747 | 0.010674 |
| EARS2    | -0.017142881 | 0.697929 | 0.753617 |
| EBAG9    | 0.123018499  | 0.005181 | 0.009706 |
| EBF1     | -0.133358001 | 0.002425 | 0.004815 |
| EBF2     | -0.139286738 | 0.001531 | 0.00315  |
| EBF3     | -0.203572223 | 3.20E-06 | 1.03E-05 |
| EBF4     | -0.413039269 | 1.23E-22 | 4.73E-21 |
| EBI3     | -0.147998057 | 0.000754 | 0.001641 |
| EBNA1BP2 | 0.320058692  | 9.90E-14 | 1.00E-12 |
| EBPL     | 0.211805637  | 1.23E-06 | 4.26E-06 |
| EBP      | 0.188348203  | 1.69E-05 | 4.89E-05 |
| ECD      | 0.185829895  | 2.20E-05 | 6.23E-05 |
| ECE1     | -0.09512771  | 0.030893 | 0.049439 |
| ECE2     | 0.425628501  | 4.46E-24 | 2.16E-22 |

|          |              |          |          |
|----------|--------------|----------|----------|
| ECEL1    | 0.005789739  | 0.895718 | 0.91837  |
| ECH1     | -0.050956713 | 0.248364 | 0.316238 |
| ECHDC1   | -0.254265569 | 4.84E-09 | 2.42E-08 |
| ECHDC2   | -0.443370676 | 3.27E-26 | 2.19E-24 |
| ECHDC3   | -0.119779837 | 0.0065   | 0.011948 |
| ECHS1    | 0.168645031  | 0.00012  | 0.000302 |
| ECM1     | -0.14218353  | 0.001215 | 0.002546 |
| ECM2     | -0.170341726 | 0.000102 | 0.00026  |
| ECSCR    | -0.128290068 | 0.003542 | 0.006823 |
| ECSIT    | 0.03932932   | 0.37309  | 0.447914 |
| ECT2L    | -0.216183974 | 7.32E-07 | 2.62E-06 |
| ECT2     | 0.514063159  | 4.45E-36 | 1.53E-33 |
| EDA2R    | -0.276126853 | 1.82E-10 | 1.13E-09 |
| EDARADD  | 0.242368137  | 2.55E-08 | 1.15E-07 |
| EDAR     | -0.032979113 | 0.455184 | 0.529213 |
| EDA      | -0.267196339 | 7.22E-10 | 4.10E-09 |
| EDC3     | 0.153442063  | 0.000475 | 0.001069 |
| EDC4     | -0.198165521 | 5.87E-06 | 1.82E-05 |
| EDDM3A   | -0.092313789 | 0.036232 | 0.057114 |
| EDDM3B   | -0.129019517 | 0.003356 | 0.006498 |
| EDEM1    | -0.157965798 | 0.00032  | 0.000743 |
| EDEM2    | 0.094638608  | 0.03177  | 0.050708 |
| EDEM3    | 0.111089909  | 0.011645 | 0.020374 |
| EDF1     | 0.007543746  | 0.864396 | 0.893497 |
| EDIL3    | 0.014608292  | 0.740851 | 0.79023  |
| EDN1     | -0.115101525 | 0.008938 | 0.016003 |
| EDN2     | -0.03901029  | 0.376983 | 0.451797 |
| EDN3     | -0.305834757 | 1.30E-12 | 1.12E-11 |
| EDNRA    | -0.092693429 | 0.035469 | 0.056012 |
| EDNRB    | -0.26701154  | 7.42E-10 | 4.21E-09 |
| EEA1     | -0.062867056 | 0.154266 | 0.208879 |
| EED      | 0.266502661  | 8.01E-10 | 4.52E-09 |
| EEF1A1P9 | -0.008578959 | 0.846005 | 0.878165 |
| EEF1A1   | 0.038740213  | 0.380297 | 0.455009 |
| EEF1A2   | 0.047139604  | 0.285628 | 0.356575 |
| EEF1B2   | 0.205397022  | 2.60E-06 | 8.52E-06 |
| EEF1DP3  | 0.001011567  | 0.98173  | 0.986319 |
| EEF1D    | 0.069430515  | 0.115557 | 0.161781 |
| EEF1E1   | 0.445659452  | 1.70E-26 | 1.17E-24 |
| EEF1G    | 0.216397136  | 7.13E-07 | 2.56E-06 |
| EEF2K    | -0.214170322 | 9.32E-07 | 3.29E-06 |
| EEF2     | -0.006512207 | 0.882794 | 0.908053 |
| EEFSEC   | -0.141327476 | 0.001302 | 0.002713 |
| EEPDP1   | -0.072254764 | 0.101447 | 0.144055 |

|         |              |          |          |
|---------|--------------|----------|----------|
| EFCAB10 | -0.14588976  | 0.000899 | 0.001925 |
| EFCAB1  | -0.22636006  | 2.08E-07 | 8.15E-07 |
| EFCAB2  | -0.050234319 | 0.255143 | 0.323632 |
| EFCAB3  | 0.099765867  | 0.023562 | 0.038673 |
| EFCAB4A | -0.182141761 | 3.21E-05 | 8.83E-05 |
| EFCAB4B | 0.100210296  | 0.022946 | 0.03777  |
| EFCAB5  | -0.176998364 | 5.37E-05 | 0.000142 |
| EFCAB6  | -0.42462894  | 5.84E-24 | 2.78E-22 |
| EFCAB7  | -0.082371262 | 0.061771 | 0.092569 |
| EFEMP1  | -0.285452249 | 4.11E-11 | 2.80E-10 |
| EFEMP2  | -0.148135129 | 0.000746 | 0.001625 |
| EFHA1   | 0.129107389  | 0.003335 | 0.006461 |
| EFHA2   | -0.288969126 | 2.31E-11 | 1.63E-10 |
| EFHB    | -0.266726713 | 7.75E-10 | 4.38E-09 |
| EFHC1   | -0.296070784 | 7.04E-12 | 5.39E-11 |
| EFHC2   | -0.279116955 | 1.14E-10 | 7.25E-10 |
| EFHD1   | -0.164021754 | 0.000185 | 0.000451 |
| EFHD2   | 0.068053816  | 0.122971 | 0.17094  |
| EFNA1   | -0.08372623  | 0.057595 | 0.086864 |
| EFNA2   | 0.17481013   | 6.66E-05 | 0.000174 |
| EFNA3   | 0.176373956  | 5.71E-05 | 0.000151 |
| EFNA4   | 0.027467455  | 0.533982 | 0.605196 |
| EFNA5   | 0.038998974  | 0.377121 | 0.451885 |
| EFNB1   | -0.158585813 | 0.000303 | 0.000706 |
| EFNB2   | -0.054408779 | 0.217708 | 0.282037 |
| EFNB3   | -0.112035244 | 0.010949 | 0.019277 |
| EFR3A   | 0.103130273  | 0.019234 | 0.032169 |
| EFR3B   | -0.109068353 | 0.013267 | 0.022941 |
| EFS     | -0.194832574 | 8.45E-06 | 2.56E-05 |
| EFTUD1  | -0.04621731  | 0.295169 | 0.366496 |
| EFTUD2  | 0.2913242    | 1.56E-11 | 1.14E-10 |
| EGFL6   | -0.110165256 | 0.012364 | 0.02151  |
| EGFL7   | -0.088973315 | 0.043568 | 0.067475 |
| EGFL8   | -0.111161242 | 0.011591 | 0.020291 |
| EGFLAM  | 0.133012365  | 0.002489 | 0.004932 |
| EGFR    | -0.109413025 | 0.012977 | 0.022488 |
| EGF     | 0.015384782  | 0.727609 | 0.779224 |
| EGLN1   | 0.308327713  | 8.36E-13 | 7.41E-12 |
| EGLN2   | -0.242409766 | 2.53E-08 | 1.14E-07 |
| EGLN3   | 0.291320748  | 1.56E-11 | 1.14E-10 |
| EGOT    | -0.214415487 | 9.05E-07 | 3.20E-06 |
| EGR1    | -0.243776386 | 2.10E-08 | 9.57E-08 |
| EGR2    | -0.201833193 | 3.90E-06 | 1.24E-05 |
| EGR3    | -0.24281627  | 2.40E-08 | 1.08E-07 |



|         |              |          |          |
|---------|--------------|----------|----------|
| EGR4    | -0.079757739 | 0.070533 | 0.104222 |
| EHBP1L1 | -0.205693631 | 2.51E-06 | 8.27E-06 |
| EHBP1   | 0.293136528  | 1.15E-11 | 8.55E-11 |
| EHD1    | -0.079798274 | 0.070389 | 0.104033 |
| EHD2    | -0.274307051 | 2.42E-10 | 1.48E-09 |
| EHD3    | 0.024303511  | 0.58213  | 0.649092 |
| EHD4    | -0.110333895 | 0.01223  | 0.021299 |
| EHF     | -0.194798797 | 8.48E-06 | 2.57E-05 |
| EHHADH  | 0.027352078  | 0.535702 | 0.606801 |
| EHMT1   | -0.06073112  | 0.168781 | 0.226173 |
| EHMT2   | 0.014754594  | 0.73835  | 0.788362 |
| EI24    | 0.190503247  | 1.35E-05 | 3.95E-05 |
| EID1    | -0.123410337 | 0.005039 | 0.009461 |
| EID2B   | -0.233794506 | 7.99E-08 | 3.34E-07 |
| EID2    | -0.026611961 | 0.546801 | 0.617239 |
| EID3    | 0.119331805  | 0.006704 | 0.012299 |
| EIF1AD  | 0.211212081  | 1.32E-06 | 4.55E-06 |
| EIF1AX  | 0.115739206  | 0.008564 | 0.015379 |
| EIF1AY  | 0.158700028  | 0.0003   | 0.0007   |
| EIF1B   | 0.065758664  | 0.136148 | 0.187188 |
| EIF1    | 0.141070884  | 0.001329 | 0.002763 |
| EIF2AK1 | 0.248416885  | 1.11E-08 | 5.25E-08 |
| EIF2AK2 | 0.231360635  | 1.10E-07 | 4.50E-07 |
| EIF2AK3 | 0.113121335  | 0.010195 | 0.018069 |
| EIF2AK4 | 0.108441171  | 0.013809 | 0.023806 |
| EIF2A   | 0.220263887  | 4.45E-07 | 1.66E-06 |
| EIF2B1  | 0.29899457   | 4.27E-12 | 3.36E-11 |
| EIF2B2  | 0.321536884  | 7.51E-14 | 7.76E-13 |
| EIF2B3  | 0.195440036  | 7.91E-06 | 2.40E-05 |
| EIF2B4  | 0.066810918  | 0.129978 | 0.179507 |
| EIF2B5  | -0.020138376 | 0.648427 | 0.708611 |
| EIF2C1  | -0.250983519 | 7.72E-09 | 3.76E-08 |
| EIF2C2  | 0.340009835  | 2.11E-15 | 2.78E-14 |
| EIF2C3  | 0.076410717  | 0.08321  | 0.120741 |
| EIF2C4  | -0.367287054 | 6.82E-18 | 1.31E-16 |
| EIF2S1  | 0.538536446  | 4.55E-40 | 3.95E-37 |
| EIF2S2  | 0.431001608  | 1.04E-24 | 5.49E-23 |
| EIF2S3  | 0.242081356  | 2.65E-08 | 1.19E-07 |
| EIF3A   | 0.181618164  | 3.38E-05 | 9.28E-05 |
| EIF3B   | 0.289151932  | 2.24E-11 | 1.59E-10 |
| EIF3CL  | -0.052898083 | 0.230773 | 0.296788 |
| EIF3C   | 0.18651281   | 2.05E-05 | 5.83E-05 |
| EIF3D   | 0.190705894  | 1.32E-05 | 3.87E-05 |
| EIF3E   | 0.28093566   | 8.52E-11 | 5.55E-10 |

|           |              |          |          |
|-----------|--------------|----------|----------|
| EIF3F     | 0.08983516   | 0.041565 | 0.064714 |
| EIF3G     | -0.052327916 | 0.235845 | 0.302436 |
| EIF3H     | 0.322514199  | 6.25E-14 | 6.53E-13 |
| EIF3IP1   | 0.152575     | 0.000512 | 0.001146 |
| EIF3I     | 0.263709775  | 1.22E-09 | 6.67E-09 |
| EIF3J     | 0.430779146  | 1.10E-24 | 5.80E-23 |
| EIF3K     | 0.067013274  | 0.128816 | 0.178026 |
| EIF3L     | -0.015829069 | 0.720068 | 0.772473 |
| EIF3M     | 0.329583523  | 1.63E-14 | 1.87E-13 |
| EIF4A1    | 0.418789887  | 2.75E-23 | 1.18E-21 |
| EIF4A2    | -0.043372084 | 0.325932 | 0.399187 |
| EIF4A3    | 0.460713859  | 2.01E-28 | 1.73E-26 |
| EIF4B     | 0.153047529  | 0.000492 | 0.001103 |
| EIF4E1B   | -0.071368635 | 0.105719 | 0.149325 |
| EIF4E2    | 0.067955569  | 0.123514 | 0.171541 |
| EIF4E3    | -0.263563891 | 1.24E-09 | 6.79E-09 |
| EIF4EBP1  | 0.328625232  | 1.96E-14 | 2.22E-13 |
| EIF4EBP2  | -0.158367835 | 0.000309 | 0.000719 |
| EIF4EBP3  | -0.253181239 | 5.65E-09 | 2.80E-08 |
| EIF4ENIF1 | -0.179734288 | 4.09E-05 | 0.000111 |
| EIF4E     | 0.401027825  | 2.56E-21 | 8.19E-20 |
| EIF4G1    | 0.134412521  | 0.002237 | 0.004472 |
| EIF4G2    | 0.153589307  | 0.000469 | 0.001056 |
| EIF4G3    | -0.027777343 | 0.529377 | 0.601233 |
| EIF4H     | 0.161108617  | 0.000241 | 0.000574 |
| EIF5A2    | 0.188971015  | 1.58E-05 | 4.60E-05 |
| EIF5AL1   | 0.477113422  | 1.23E-30 | 1.51E-28 |
| EIF5A     | 0.429817403  | 1.43E-24 | 7.39E-23 |
| EIF5B     | 0.27830042   | 1.30E-10 | 8.20E-10 |
| EIF5      | 0.149081808  | 0.000689 | 0.00151  |
| EIF6      | 0.264238277  | 1.13E-09 | 6.20E-09 |
| ELAC1     | -0.149142814 | 0.000685 | 0.001503 |
| ELAC2     | 0.061611056  | 0.162682 | 0.218866 |
| ELANE     | -0.34240018  | 1.30E-15 | 1.77E-14 |
| ELAVL1    | 0.205109981  | 2.69E-06 | 8.78E-06 |
| ELAVL2    | -0.006699495 | 0.879449 | 0.905591 |
| ELAVL3    | -0.043424742 | 0.325345 | 0.398532 |
| ELAVL4    | -0.027335228 | 0.535954 | 0.606949 |
| ELF1      | -0.012949881 | 0.769386 | 0.814668 |
| ELF2      | -0.191573005 | 1.20E-05 | 3.55E-05 |
| ELF3      | -0.194919396 | 8.37E-06 | 2.53E-05 |
| ELF4      | -0.119488518 | 0.006632 | 0.012175 |
| ELF5      | -0.224906264 | 2.50E-07 | 9.66E-07 |
| ELFN1     | 0.054062132  | 0.220658 | 0.285433 |

|         |              |          |          |
|---------|--------------|----------|----------|
| ELFN2   | -0.201007871 | 4.28E-06 | 1.36E-05 |
| ELK1    | 0.198217833  | 5.83E-06 | 1.81E-05 |
| ELK3    | 0.062835908  | 0.154471 | 0.209099 |
| ELK4    | -0.000161247 | 0.997087 | 0.998086 |
| ELL2    | 0.129415817  | 0.003259 | 0.006321 |
| ELL3    | 0.012618907  | 0.77512  | 0.819177 |
| ELL     | -0.241255003 | 2.96E-08 | 1.32E-07 |
| ELMO1   | -0.237759308 | 4.73E-08 | 2.04E-07 |
| ELMO2   | -0.190100514 | 1.40E-05 | 4.12E-05 |
| ELMO3   | -0.1755868   | 6.17E-05 | 0.000162 |
| ELMOD1  | -0.12218477  | 0.005495 | 0.01025  |
| ELMOD2  | 0.252588212  | 6.15E-09 | 3.03E-08 |
| ELMOD3  | -0.301122302 | 2.96E-12 | 2.39E-11 |
| ELN     | -0.406575934 | 6.39E-22 | 2.23E-20 |
| ELOF1   | -0.056586966 | 0.199818 | 0.261814 |
| ELOVL1  | -0.008489656 | 0.847588 | 0.879535 |
| ELOVL2  | 0.073913952  | 0.093818 | 0.134291 |
| ELOVL3  | 0.027931543  | 0.527092 | 0.599188 |
| ELOVL4  | 0.15360277   | 0.000469 | 0.001055 |
| ELOVL5  | 0.130303071  | 0.003052 | 0.005952 |
| ELOVL6  | 0.285552001  | 4.04E-11 | 2.76E-10 |
| ELOVL7  | 0.028264458  | 0.522178 | 0.594074 |
| ELP2P   | -0.123519716 | 0.005    | 0.009393 |
| ELP2    | 0.121784501  | 0.005652 | 0.010515 |
| ELP3    | 0.021648108  | 0.624037 | 0.686777 |
| ELP4    | 0.107267081  | 0.014876 | 0.025498 |
| ELSPBP1 | 0.062126451  | 0.159188 | 0.214772 |
| ELTD1   | 0.019214299  | 0.663546 | 0.722147 |
| EMB     | -0.267262398 | 7.14E-10 | 4.06E-09 |
| EMCN    | -0.28995186  | 1.96E-11 | 1.41E-10 |
| EMD     | 0.040200686  | 0.362585 | 0.437193 |
| EME1    | 0.360130624  | 3.24E-17 | 5.62E-16 |
| EME2    | -0.206296167 | 2.35E-06 | 7.75E-06 |
| EMG1    | 0.362160471  | 2.09E-17 | 3.70E-16 |
| EMID1   | -0.207891791 | 1.95E-06 | 6.53E-06 |
| EMID2   | -0.066017377 | 0.134611 | 0.185303 |
| EMILIN1 | -0.079960818 | 0.069817 | 0.103279 |
| EMILIN2 | -0.160095895 | 0.000264 | 0.000624 |
| EMILIN3 | -0.140934146 | 0.001343 | 0.002791 |
| EML1    | -0.132603609 | 0.002568 | 0.005075 |
| EML2    | -0.093567949 | 0.033763 | 0.053551 |
| EML3    | -0.301190677 | 2.93E-12 | 2.36E-11 |
| EML4    | -0.16531013  | 0.000164 | 0.000404 |
| EML5    | -0.205266435 | 2.64E-06 | 8.64E-06 |

|        |              |          |          |
|--------|--------------|----------|----------|
| EML6   | -0.243566094 | 2.16E-08 | 9.83E-08 |
| EMP1   | -0.115140349 | 0.008915 | 0.015965 |
| EMP2   | -0.33428993  | 6.54E-15 | 7.98E-14 |
| EMP3   | -0.05779786  | 0.190348 | 0.250995 |
| EMR1   | -0.081188497 | 0.065618 | 0.09774  |
| EMR2   | 0.033594005  | 0.446817 | 0.521122 |
| EMR3   | -0.206188426 | 2.37E-06 | 7.84E-06 |
| EMR4P  | -0.40799428  | 4.46E-22 | 1.59E-20 |
| EMX1   | -0.032909934 | 0.456131 | 0.530159 |
| EMX2OS | -0.027279367 | 0.536788 | 0.607652 |
| EMX2   | 0.027943908  | 0.526909 | 0.599014 |
| EN1    | 0.077248402  | 0.079876 | 0.116504 |
| EN2    | -0.133492133 | 0.0024   | 0.004772 |
| ENAH   | 0.157455334  | 0.000335 | 0.000774 |
| ENAM   | -0.134031916 | 0.002303 | 0.004593 |
| ENC1   | -0.253638342 | 5.29E-09 | 2.63E-08 |
| ENDOD1 | -0.228840932 | 1.52E-07 | 6.06E-07 |
| ENDOG  | 0.064331419  | 0.144875 | 0.197771 |
| ENDOU  | -0.315328612 | 2.37E-13 | 2.27E-12 |
| ENGASE | -0.377833424 | 6.39E-19 | 1.43E-17 |
| ENG    | -0.357983084 | 5.13E-17 | 8.60E-16 |
| ENHO   | -0.241199365 | 2.98E-08 | 1.33E-07 |
| ENKUR  | -0.152358609 | 0.000522 | 0.001166 |
| ENO1   | 0.260895958  | 1.85E-09 | 9.82E-09 |
| ENO2   | -0.024592971 | 0.577643 | 0.645096 |
| ENO3   | 0.051231797  | 0.245816 | 0.313453 |
| ENOPH1 | 0.399801201  | 3.46E-21 | 1.09E-19 |
| ENOSF1 | -0.190631453 | 1.33E-05 | 3.90E-05 |
| ENOX1  | 0.160020017  | 0.000266 | 0.000628 |
| ENOX2  | 0.141407003  | 0.001293 | 0.002697 |
| ENPEP  | 0.139296282  | 0.00153  | 0.003148 |
| ENPP1  | 0.217822277  | 6.00E-07 | 2.19E-06 |
| ENPP2  | -0.129263923 | 0.003296 | 0.006389 |
| ENPP3  | -0.203511729 | 3.22E-06 | 1.04E-05 |
| ENPP4  | -0.261938292 | 1.58E-09 | 8.52E-09 |
| ENPP5  | -0.353847813 | 1.23E-16 | 1.93E-15 |
| ENPP6  | -0.218163174 | 5.76E-07 | 2.10E-06 |
| ENPP7  | -0.022707257 | 0.607165 | 0.671723 |
| ENSA   | 0.060366002  | 0.171362 | 0.22917  |
| ENTHD1 | 0.084429748  | 0.055521 | 0.084046 |
| ENTPD1 | -0.139439869 | 0.001513 | 0.003117 |
| ENTPD2 | -0.014741131 | 0.73858  | 0.788564 |
| ENTPD3 | -0.275968109 | 1.87E-10 | 1.16E-09 |
| ENTPD4 | -0.081632031 | 0.064153 | 0.095715 |

|          |              |          |          |
|----------|--------------|----------|----------|
| ENTPD5   | 0.121203154  | 0.005887 | 0.010909 |
| ENTPD6   | -0.046362856 | 0.29365  | 0.364949 |
| ENTPD7   | 0.37761524   | 6.72E-19 | 1.49E-17 |
| ENTPD8   | 0.050852818  | 0.249331 | 0.317267 |
| ENY2     | 0.339047309  | 2.55E-15 | 3.33E-14 |
| EOMES    | -0.070178348 | 0.111679 | 0.156879 |
| EP300    | -0.156118313 | 0.000376 | 0.000861 |
| EP400NL  | -0.058919692 | 0.181873 | 0.241242 |
| EP400    | -0.021132594 | 0.632321 | 0.694022 |
| EPAS1    | -0.131740373 | 0.00274  | 0.005391 |
| EPB41L1  | -0.317464946 | 1.60E-13 | 1.57E-12 |
| EPB41L2  | -0.178026572 | 4.85E-05 | 0.00013  |
| EPB41L3  | -0.118979767 | 0.006869 | 0.012579 |
| EPB41L4A | -0.460943376 | 1.87E-28 | 1.65E-26 |
| EPB41L4B | -0.07776681  | 0.077868 | 0.113882 |
| EPB41L5  | -0.169778816 | 0.000108 | 0.000274 |
| EPB41    | -0.271150624 | 3.95E-10 | 2.33E-09 |
| EPB42    | -0.062011855 | 0.15996  | 0.215683 |
| EPB49    | -0.264491965 | 1.08E-09 | 5.99E-09 |
| EPC1     | -0.119052772 | 0.006835 | 0.012519 |
| EPC2     | -0.099053109 | 0.02458  | 0.040185 |
| EPCAM    | 0.137904691  | 0.001707 | 0.003483 |
| EPDR1    | -0.238859591 | 4.09E-08 | 1.78E-07 |
| EPGN     | 0.08173672   | 0.063811 | 0.095269 |
| EPHA10   | -0.199176675 | 5.24E-06 | 1.64E-05 |
| EPHA1    | -0.123770194 | 0.004911 | 0.00924  |
| EPHA2    | -0.166541443 | 0.000147 | 0.000363 |
| EPHA3    | -0.170535381 | 0.000101 | 0.000256 |
| EPHA4    | -0.335808068 | 4.85E-15 | 6.04E-14 |
| EPHA5    | -0.110927698 | 0.011768 | 0.020562 |
| EPHA6    | 0.162705552  | 0.000209 | 0.000504 |
| EPHA7    | -0.005171871 | 0.906793 | 0.927252 |
| EPHA8    | -0.025310001 | 0.566596 | 0.635208 |
| EPHB1    | 0.047270005  | 0.284296 | 0.355134 |
| EPHB2    | 0.058057789  | 0.188359 | 0.248822 |
| EPHB3    | -0.1621473   | 0.00022  | 0.000528 |
| EPHB4    | -0.027824471 | 0.528678 | 0.600751 |
| EPHB6    | -0.315091753 | 2.47E-13 | 2.37E-12 |
| EPHX1    | -0.15458064  | 0.00043  | 0.000977 |
| EPHX2    | -0.299598056 | 3.85E-12 | 3.05E-11 |
| EPHX3    | -0.054209483 | 0.219401 | 0.283917 |
| EPHX4    | 0.161286824  | 0.000237 | 0.000566 |
| EPM2AIP1 | -0.328646545 | 1.95E-14 | 2.21E-13 |
| EPM2A    | -0.243307437 | 2.24E-08 | 1.02E-07 |

|         |              |          |          |
|---------|--------------|----------|----------|
| EPN1    | -0.053553433 | 0.225039 | 0.290273 |
| EPN2    | -0.215760796 | 7.70E-07 | 2.75E-06 |
| EPN3    | 0.06381444   | 0.148139 | 0.20158  |
| EPOR    | -0.316136586 | 2.04E-13 | 1.98E-12 |
| EPO     | -0.017125636 | 0.698218 | 0.753889 |
| EPPK1   | 0.004425875  | 0.920189 | 0.937544 |
| EPR1    | 0.492763911  | 7.35E-33 | 1.31E-30 |
| EPRS    | 0.264210702  | 1.13E-09 | 6.23E-09 |
| EPS15L1 | -0.082154097 | 0.062463 | 0.093473 |
| EPS15   | -0.188944354 | 1.59E-05 | 4.61E-05 |
| EPS8L1  | -0.180261024 | 3.88E-05 | 0.000105 |
| EPS8L2  | -0.274957243 | 2.19E-10 | 1.34E-09 |
| EPS8L3  | 0.199376752  | 5.13E-06 | 1.61E-05 |
| EPS8    | -0.070520727 | 0.109938 | 0.154673 |
| EPSTI1  | 0.081399222  | 0.064919 | 0.096727 |
| EPT1    | 0.471395811  | 7.52E-30 | 8.03E-28 |
| EPX     | -0.289392204 | 2.15E-11 | 1.53E-10 |
| EPYC    | 0.14283347   | 0.001153 | 0.002426 |
| ERAL1   | 0.200959606  | 4.30E-06 | 1.36E-05 |
| ERAP1   | -0.085023631 | 0.053818 | 0.081772 |
| ERAP2   | -0.027829649 | 0.528601 | 0.600698 |
| ERAS    | -0.162998734 | 0.000203 | 0.000491 |
| ERBB2IP | -0.085941452 | 0.051273 | 0.078268 |
| ERBB2   | -0.162429211 | 0.000214 | 0.000516 |
| ERBB3   | -0.17072307  | 9.88E-05 | 0.000252 |
| ERBB4   | -0.405768352 | 7.83E-22 | 2.70E-20 |
| ERC1    | 0.061811359  | 0.161318 | 0.217235 |
| ERC2    | -0.11657947  | 0.008092 | 0.014624 |
| ERCC1   | 0.069374267  | 0.115853 | 0.16215  |
| ERCC2   | 0.015102679  | 0.73241  | 0.783359 |
| ERCC3   | 0.090019773  | 0.041146 | 0.064127 |
| ERCC4   | -0.008411246 | 0.848979 | 0.880658 |
| ERCC5   | -0.345333335 | 7.19E-16 | 1.01E-14 |
| ERCC6L  | 0.522392183  | 2.12E-37 | 9.42E-35 |
| ERCC6   | -0.078455317 | 0.075264 | 0.110511 |
| ERCC8   | 0.210505677  | 1.44E-06 | 4.92E-06 |
| EREG    | 0.13279322   | 0.002531 | 0.005009 |
| ERF     | 0.010238242  | 0.816706 | 0.853731 |
| ERGIC1  | -0.047290185 | 0.28409  | 0.354922 |
| ERGIC2  | 0.413131692  | 1.20E-22 | 4.67E-21 |
| ERGIC3  | 0.114514346  | 0.009295 | 0.016598 |
| ERG     | -0.28336498  | 5.77E-11 | 3.84E-10 |
| ERH     | 0.432509813  | 6.86E-25 | 3.76E-23 |
| ERI1    | 0.212951521  | 1.08E-06 | 3.76E-06 |

|          |              |          |          |
|----------|--------------|----------|----------|
| ERI2     | 0.062688227  | 0.155444 | 0.210288 |
| ERI3     | 0.058352591  | 0.186122 | 0.246159 |
| ERICH1   | -0.252132407 | 6.56E-09 | 3.22E-08 |
| ERLEC1   | 0.084946923  | 0.054036 | 0.082078 |
| ERLIN1   | 0.401209211  | 2.44E-21 | 7.88E-20 |
| ERLIN2   | 0.093255385  | 0.034364 | 0.054393 |
| ERMAP    | -0.342555123 | 1.26E-15 | 1.72E-14 |
| ERMN     | -0.159342529 | 0.000283 | 0.000665 |
| ERMP1    | 0.167774345  | 0.000131 | 0.000326 |
| ERN1     | -0.177014372 | 5.36E-05 | 0.000142 |
| ERN2     | -0.119930073 | 0.006433 | 0.011836 |
| ERO1LB   | -0.079443588 | 0.071651 | 0.105726 |
| ERO1L    | 0.540691952  | 1.95E-40 | 1.77E-37 |
| ERP27    | -0.265055802 | 9.96E-10 | 5.54E-09 |
| ERP29    | 0.07800944   | 0.076942 | 0.112701 |
| ERP44    | 0.114099368  | 0.009556 | 0.017032 |
| ERRFI1   | 0.1883327    | 1.69E-05 | 4.89E-05 |
| ERVFRDE1 | -0.421316228 | 1.41E-23 | 6.31E-22 |
| ESAM     | -0.302704835 | 2.25E-12 | 1.86E-11 |
| ESCO1    | 0.093860393  | 0.033208 | 0.052738 |
| ESCO2    | 0.493342547  | 6.05E-33 | 1.14E-30 |
| ESD      | 0.075042303  | 0.088898 | 0.128054 |
| ESF1     | 0.194683109  | 8.59E-06 | 2.60E-05 |
| ESM1     | 0.259711235  | 2.20E-09 | 1.15E-08 |
| ESPL1    | 0.446949181  | 1.17E-26 | 8.24E-25 |
| ESPNL    | -0.099498417 | 0.02394  | 0.039218 |
| ESPNP    | -0.202810504 | 3.49E-06 | 1.12E-05 |
| ESPN     | -0.057648537 | 0.191498 | 0.252351 |
| ESR1     | -0.099950533 | 0.023304 | 0.038303 |
| ESR2     | -0.141087645 | 0.001327 | 0.00276  |
| ESRP1    | 0.113252625  | 0.010107 | 0.017927 |
| ESRP2    | -0.186490713 | 2.05E-05 | 5.85E-05 |
| ESRRA    | 0.071530274  | 0.104929 | 0.148367 |
| ESRRB    | -0.13283662  | 0.002523 | 0.004994 |
| ESRRG    | -0.204979717 | 2.73E-06 | 8.90E-06 |
| ESX1     | 0.143991503  | 0.00105  | 0.002224 |
| ESYT1    | 0.012603962  | 0.775379 | 0.819331 |
| ESYT2    | 0.009837329  | 0.823763 | 0.859721 |
| ESYT3    | -0.436978769 | 1.99E-25 | 1.19E-23 |
| ETAA1    | -0.172532112 | 8.31E-05 | 0.000214 |
| ETF1     | 0.152082861  | 0.000534 | 0.001191 |
| ETFA     | 0.295392089  | 7.89E-12 | 6.01E-11 |
| ETFB     | 0.018447947  | 0.676189 | 0.733728 |
| ETFDH    | -0.101493022 | 0.021245 | 0.035235 |

|         |              |          |          |
|---------|--------------|----------|----------|
| ETHE1   | 0.149805706  | 0.000648 | 0.001426 |
| ETNK1   | 0.140181089  | 0.001426 | 0.002951 |
| ETNK2   | -0.134612353 | 0.002203 | 0.00441  |
| ETS1    | -0.104971606 | 0.017173 | 0.028996 |
| ETS2    | -0.119706156 | 0.006533 | 0.012007 |
| ETV1    | -0.284316266 | 4.94E-11 | 3.32E-10 |
| ETV2    | -0.073306742 | 0.096555 | 0.137853 |
| ETV3L   | -0.050165541 | 0.255795 | 0.324377 |
| ETV3    | -0.098431094 | 0.025499 | 0.041562 |
| ETV4    | -0.055682038 | 0.207116 | 0.270207 |
| ETV5    | -0.246683668 | 1.41E-08 | 6.58E-08 |
| ETV6    | -0.033927723 | 0.442313 | 0.516622 |
| ETV7    | -0.089585053 | 0.042138 | 0.065494 |
| EVC2    | -0.128772179 | 0.003418 | 0.006606 |
| EVC     | -0.279525864 | 1.07E-10 | 6.84E-10 |
| EVI2A   | -0.110980089 | 0.011729 | 0.020499 |
| EVI2B   | -0.226894474 | 1.94E-07 | 7.65E-07 |
| EVI5L   | -0.28623763  | 3.62E-11 | 2.48E-10 |
| EVI5    | -0.179983081 | 3.99E-05 | 0.000108 |
| EVL     | -0.340218422 | 2.02E-15 | 2.67E-14 |
| EVPLL   | -0.284562965 | 4.75E-11 | 3.20E-10 |
| EVPL    | -0.318463434 | 1.33E-13 | 1.33E-12 |
| EVX1    | 0.066743237  | 0.130368 | 0.180008 |
| EVX2    | -0.021957847 | 0.619082 | 0.682376 |
| EWSR1   | -0.137548496 | 0.001755 | 0.003572 |
| EXD1    | -0.092259397 | 0.036342 | 0.057267 |
| EXD2    | 0.190703795  | 1.32E-05 | 3.87E-05 |
| EXD3    | -0.219597374 | 4.83E-07 | 1.79E-06 |
| EXO1    | 0.527189126  | 3.53E-38 | 1.91E-35 |
| EXOC1   | 0.080979288  | 0.066319 | 0.098659 |
| EXOC2   | 0.067099045  | 0.128327 | 0.177434 |
| EXOC3L2 | -0.087043781 | 0.048349 | 0.074179 |
| EXOC3L  | -0.2650452   | 9.97E-10 | 5.55E-09 |
| EXOC3   | -0.101951949 | 0.020664 | 0.034342 |
| EXOC4   | 0.132989371  | 0.002494 | 0.00494  |
| EXOC5   | 0.394731077  | 1.20E-20 | 3.42E-19 |
| EXOC6B  | -0.026338158 | 0.550935 | 0.621135 |
| EXOC6   | 0.169894546  | 0.000107 | 0.000271 |
| EXOC7   | -0.233340705 | 8.48E-08 | 3.53E-07 |
| EXOC8   | -0.150112996 | 0.000631 | 0.001392 |
| EXOG    | -0.113801958 | 0.009746 | 0.017347 |
| EXOSC10 | 0.04730304   | 0.283959 | 0.354802 |
| EXOSC1  | 0.218239055  | 5.70E-07 | 2.09E-06 |
| EXOSC2  | 0.335520914  | 5.13E-15 | 6.37E-14 |



|        |              |          |          |
|--------|--------------|----------|----------|
| EXOSC3 | 0.368484009  | 5.24E-18 | 1.02E-16 |
| EXOSC4 | 0.263443414  | 1.27E-09 | 6.90E-09 |
| EXOSC5 | 0.140553538  | 0.001385 | 0.002872 |
| EXOSC6 | 0.115936097  | 0.008451 | 0.015199 |
| EXOSC7 | 0.043711299  | 0.322159 | 0.395147 |
| EXOSC8 | 0.254996605  | 4.36E-09 | 2.19E-08 |
| EXOSC9 | 0.164322396  | 0.00018  | 0.000439 |
| EXPH5  | -0.295611974 | 7.61E-12 | 5.81E-11 |
| EXT1   | 0.09256482   | 0.035726 | 0.056391 |
| EXT2   | 0.099893348  | 0.023384 | 0.038409 |
| EXTL1  | -0.112964929 | 0.010301 | 0.018241 |
| EXTL2  | 0.037142717  | 0.400267 | 0.474809 |
| EXTL3  | -0.004135753 | 0.925405 | 0.941802 |
| EYA1   | -0.097742964 | 0.02655  | 0.043118 |
| EYA2   | -0.092360826 | 0.036136 | 0.056981 |
| EYA3   | -0.031589783 | 0.47441  | 0.54809  |
| EYA4   | -0.054900935 | 0.213569 | 0.27752  |
| EYS    | 0.121673265  | 0.005696 | 0.010587 |
| EZH1   | -0.514775243 | 3.44E-36 | 1.23E-33 |
| EZH2   | 0.327523882  | 2.42E-14 | 2.69E-13 |
| EZR    | -0.174085571 | 7.15E-05 | 0.000186 |
| F10    | -0.21401751  | 9.49E-07 | 3.35E-06 |
| F11R   | -0.189713627 | 1.46E-05 | 4.28E-05 |
| F11    | -0.390948555 | 2.97E-20 | 8.05E-19 |
| F12    | 0.319188531  | 1.16E-13 | 1.17E-12 |
| F13A1  | -0.139750846 | 0.001476 | 0.003046 |
| F13B   | 0.180096079  | 3.94E-05 | 0.000107 |
| F2RL1  | -0.015492567 | 0.725777 | 0.777554 |
| F2RL2  | -0.018920492 | 0.668382 | 0.726501 |
| F2RL3  | 0.009600244  | 0.827944 | 0.863092 |
| F2R    | -0.022202361 | 0.615183 | 0.678902 |
| F2     | 0.267476869  | 6.92E-10 | 3.94E-09 |
| F3     | 0.080633962  | 0.067488 | 0.100197 |
| F5     | 0.084199542  | 0.056192 | 0.084973 |
| F7     | 0.174569388  | 6.82E-05 | 0.000178 |
| F8A1   | 0.014098996  | 0.749578 | 0.797879 |
| F8     | -0.355659812 | 8.41E-17 | 1.36E-15 |
| F9     | 0.056981467  | 0.196696 | 0.258264 |
| FA2H   | 0.050956794  | 0.248363 | 0.316238 |
| FAAH2  | -0.014678053 | 0.739658 | 0.789268 |
| FAAH   | -0.412745999 | 1.33E-22 | 5.06E-21 |
| FABP12 | -0.022849292 | 0.604918 | 0.669719 |
| FABP1  | 0.089483182  | 0.042373 | 0.065798 |
| FABP2  | -0.00916149  | 0.835692 | 0.869357 |

|          |              |          |          |
|----------|--------------|----------|----------|
| FABP3    | -0.213242473 | 1.04E-06 | 3.64E-06 |
| FABP4    | -0.15702921  | 0.000347 | 0.000801 |
| FABP5L3  | 0.013545818  | 0.759094 | 0.805734 |
| FABP5    | 0.018692553  | 0.672144 | 0.729954 |
| FABP6    | -0.073749148 | 0.094555 | 0.135249 |
| FABP7    | 0.03204945   | 0.468    | 0.541803 |
| FABP9    | 0.011561334  | 0.793522 | 0.83461  |
| FADD     | 0.356199039  | 7.50E-17 | 1.22E-15 |
| FADS1    | 0.241824291  | 2.74E-08 | 1.23E-07 |
| FADS2    | 0.12206762   | 0.005541 | 0.010328 |
| FADS3    | -0.154181076 | 0.000446 | 0.001009 |
| FADS6    | -0.248694254 | 1.06E-08 | 5.07E-08 |
| FAF1     | 0.133253794  | 0.002444 | 0.004851 |
| FAF2     | 0.005756987  | 0.896305 | 0.91883  |
| FAHD1    | 0.11855381   | 0.007073 | 0.012917 |
| FAHD2A   | 0.009035701  | 0.837917 | 0.871115 |
| FAHD2B   | -0.197414987 | 6.37E-06 | 1.96E-05 |
| FAH      | -0.122204881 | 0.005487 | 0.010237 |
| FAIM2    | -0.181565914 | 3.40E-05 | 9.33E-05 |
| FAIM3    | -0.319502226 | 1.10E-13 | 1.11E-12 |
| FAIM     | 0.043903358  | 0.320036 | 0.392823 |
| FAM100A  | -0.184192227 | 2.60E-05 | 7.29E-05 |
| FAM100B  | 0.071880972  | 0.103232 | 0.146227 |
| FAM101A  | 0.204300157  | 2.95E-06 | 9.57E-06 |
| FAM101B  | -0.043507721 | 0.32442  | 0.397461 |
| FAM102A  | -0.063478319 | 0.150291 | 0.204189 |
| FAM102B  | 0.011339873  | 0.797391 | 0.837885 |
| FAM103A1 | 0.29912873   | 4.17E-12 | 3.29E-11 |
| FAM104A  | 0.215490296  | 7.95E-07 | 2.83E-06 |
| FAM104B  | -0.059373775 | 0.178522 | 0.23757  |
| FAM105A  | -0.157861044 | 0.000323 | 0.000749 |
| FAM105B  | -0.018519529 | 0.675004 | 0.732663 |
| FAM106A  | -0.079619216 | 0.071024 | 0.104862 |
| FAM106C  | -0.134404078 | 0.002239 | 0.004474 |
| FAM107A  | -0.388411899 | 5.44E-20 | 1.41E-18 |
| FAM107B  | 0.065425239  | 0.13815  | 0.189652 |
| FAM108A1 | -0.150571862 | 0.000607 | 0.001342 |
| FAM108B1 | 0.139345751  | 0.001524 | 0.003138 |
| FAM108C1 | 0.011939159  | 0.786934 | 0.828902 |
| FAM109A  | -0.093776362 | 0.033367 | 0.052969 |
| FAM109B  | 0.037191552  | 0.399647 | 0.474328 |
| FAM10A4  | 0.118362249  | 0.007167 | 0.013072 |
| FAM110A  | -0.141045087 | 0.001332 | 0.002767 |
| FAM110B  | -0.272887043 | 3.02E-10 | 1.81E-09 |

|           |              |          |          |
|-----------|--------------|----------|----------|
| FAM110C   | -0.097771291 | 0.026506 | 0.043057 |
| FAM111A   | -0.283831376 | 5.35E-11 | 3.58E-10 |
| FAM111B   | 0.284532186  | 4.77E-11 | 3.22E-10 |
| FAM113A   | -0.261719265 | 1.64E-09 | 8.77E-09 |
| FAM113B   | -0.026015471 | 0.555828 | 0.625275 |
| FAM114A1  | 0.268620048  | 5.81E-10 | 3.35E-09 |
| FAM114A2  | -0.087709817 | 0.046651 | 0.07182  |
| FAM115A   | -0.016669145 | 0.705884 | 0.760809 |
| FAM115C   | 0.001615131  | 0.970833 | 0.978075 |
| FAM116A   | -0.021996815 | 0.61846  | 0.681803 |
| FAM116B   | -0.40217865  | 1.92E-21 | 6.30E-20 |
| FAM117A   | -0.462552238 | 1.15E-28 | 1.04E-26 |
| FAM117B   | -0.109099255 | 0.01324  | 0.022899 |
| FAM118A   | -0.232158036 | 9.89E-08 | 4.08E-07 |
| FAM118B   | -0.146856613 | 0.00083  | 0.001789 |
| FAM119A   | 0.288835709  | 2.36E-11 | 1.67E-10 |
| FAM119B   | -0.027260533 | 0.537069 | 0.607902 |
| FAM120AOS | -0.032119811 | 0.467023 | 0.540838 |
| FAM120A   | 0.010692074  | 0.808734 | 0.847044 |
| FAM120B   | -0.164090679 | 0.000184 | 0.000448 |
| FAM120C   | -0.099912824 | 0.023357 | 0.038373 |
| FAM122A   | -0.242292666 | 2.57E-08 | 1.16E-07 |
| FAM122B   | -0.024784024 | 0.574689 | 0.642372 |
| FAM122C   | -0.185628055 | 2.24E-05 | 6.35E-05 |
| FAM123A   | -0.036160076 | 0.412857 | 0.487574 |
| FAM123B   | -0.005167262 | 0.906876 | 0.92726  |
| FAM123C   | -0.034427865 | 0.435611 | 0.510136 |
| FAM124A   | 0.008503505  | 0.847343 | 0.879371 |
| FAM124B   | -0.185454661 | 2.28E-05 | 6.45E-05 |
| FAM125A   | -0.02781447  | 0.528826 | 0.600886 |
| FAM125B   | -0.341201509 | 1.66E-15 | 2.23E-14 |
| FAM126A   | 0.099948309  | 0.023307 | 0.038305 |
| FAM126B   | -0.182894745 | 2.97E-05 | 8.23E-05 |
| FAM127A   | -0.026328064 | 0.551088 | 0.621179 |
| FAM127B   | 0.088202678  | 0.045428 | 0.070111 |
| FAM127C   | -0.019410808 | 0.660319 | 0.719419 |
| FAM128A   | 0.188119549  | 1.73E-05 | 5.00E-05 |
| FAM128B   | 0.111311871  | 0.011478 | 0.020127 |
| FAM129A   | -0.279582651 | 1.06E-10 | 6.78E-10 |
| FAM129B   | -0.128199058 | 0.003565 | 0.006863 |
| FAM129C   | -0.291856039 | 1.43E-11 | 1.05E-10 |
| FAM131A   | -0.082173727 | 0.0624   | 0.093407 |
| FAM131B   | -0.138702531 | 0.001603 | 0.003284 |
| FAM131C   | 0.103309323  | 0.019025 | 0.031854 |

|          |              |          |          |
|----------|--------------|----------|----------|
| FAM132A  | 0.086792005  | 0.049004 | 0.075115 |
| FAM133A  | 0.18393052   | 2.67E-05 | 7.47E-05 |
| FAM133B  | 0.062255591  | 0.158321 | 0.213762 |
| FAM134A  | -0.120014912 | 0.006395 | 0.011771 |
| FAM134B  | -0.158487511 | 0.000305 | 0.000712 |
| FAM134C  | -0.118672531 | 0.007016 | 0.012819 |
| FAM135A  | 0.049952141  | 0.257825 | 0.326579 |
| FAM135B  | -0.176642169 | 5.56E-05 | 0.000147 |
| FAM136A  | 0.430644165  | 1.14E-24 | 5.97E-23 |
| FAM136B  | 0.134871798  | 0.00216  | 0.004331 |
| FAM138B  | -0.166274599 | 0.00015  | 0.000372 |
| FAM138D  | -0.115721829 | 0.008574 | 0.015396 |
| FAM138E  | -0.086469618 | 0.049854 | 0.07633  |
| FAM138F  | -0.278445289 | 1.27E-10 | 8.03E-10 |
| FAM13AOS | -0.44585256  | 1.61E-26 | 1.11E-24 |
| FAM13A   | -0.176974714 | 5.38E-05 | 0.000143 |
| FAM13B   | -0.38382423  | 1.60E-19 | 3.94E-18 |
| FAM13C   | -0.235823198 | 6.12E-08 | 2.60E-07 |
| FAM149A  | -0.301848253 | 2.61E-12 | 2.12E-11 |
| FAM149B1 | -0.008303483 | 0.850891 | 0.882138 |
| FAM150A  | -0.197499155 | 6.31E-06 | 1.95E-05 |
| FAM150B  | -0.336899028 | 3.91E-15 | 4.95E-14 |
| FAM151A  | -0.158749509 | 0.000298 | 0.000697 |
| FAM151B  | 0.007055984  | 0.873087 | 0.901074 |
| FAM153A  | -0.262527878 | 1.45E-09 | 7.85E-09 |
| FAM153B  | -0.296098176 | 7.00E-12 | 5.37E-11 |
| FAM153C  | -0.287892489 | 2.76E-11 | 1.92E-10 |
| FAM154A  | -0.174287687 | 7.01E-05 | 0.000183 |
| FAM154B  | -0.239752192 | 3.63E-08 | 1.59E-07 |
| FAM155A  | -0.074166423 | 0.092699 | 0.132793 |
| FAM155B  | -0.065718342 | 0.136389 | 0.187456 |
| FAM156A  | -0.344203438 | 9.04E-16 | 1.26E-14 |
| FAM157A  | -0.124945577 | 0.004515 | 0.008546 |
| FAM157B  | -0.172578502 | 8.27E-05 | 0.000213 |
| FAM158A  | 0.273237194  | 2.86E-10 | 1.72E-09 |
| FAM159A  | -0.248542024 | 1.09E-08 | 5.17E-08 |
| FAM160A1 | -0.141345055 | 0.0013   | 0.00271  |
| FAM160A2 | -0.355780553 | 8.20E-17 | 1.32E-15 |
| FAM160B1 | 0.018317888  | 0.678344 | 0.735729 |
| FAM160B2 | -0.273634817 | 2.69E-10 | 1.62E-09 |
| FAM161A  | 0.005948027  | 0.892884 | 0.916169 |
| FAM161B  | -0.252584344 | 6.15E-09 | 3.03E-08 |
| FAM162A  | 0.27711346   | 1.56E-10 | 9.76E-10 |
| FAM162B  | -0.225362124 | 2.36E-07 | 9.15E-07 |

|          |              |          |          |
|----------|--------------|----------|----------|
| FAM163A  | 0.116762672  | 0.007992 | 0.014459 |
| FAM163B  | -0.026981655 | 0.541243 | 0.611898 |
| FAM164A  | -0.057959295 | 0.189111 | 0.249551 |
| FAM164C  | -0.137299778 | 0.00179  | 0.003637 |
| FAM165B  | -0.076009721 | 0.084846 | 0.122837 |
| FAM166A  | -0.226762055 | 1.98E-07 | 7.77E-07 |
| FAM166B  | -0.156650628 | 0.000359 | 0.000826 |
| FAM167A  | -0.156266712 | 0.000372 | 0.000852 |
| FAM167B  | -0.178569639 | 4.59E-05 | 0.000123 |
| FAM168A  | 0.057829188  | 0.190108 | 0.250717 |
| FAM168B  | -0.039345843 | 0.372889 | 0.447727 |
| FAM169A  | 0.017482272  | 0.692251 | 0.748294 |
| FAM169B  | -0.026327333 | 0.551099 | 0.621179 |
| FAM170A  | -0.126332526 | 0.004085 | 0.007788 |
| FAM170B  | 0.034082201  | 0.440237 | 0.514588 |
| FAM171A1 | -0.121366978 | 0.00582  | 0.010794 |
| FAM171A2 | 0.040166638  | 0.362992 | 0.437552 |
| FAM171B  | 0.071664701  | 0.104276 | 0.147517 |
| FAM172A  | -0.162858867 | 0.000206 | 0.000497 |
| FAM173A  | -0.08803667  | 0.045837 | 0.070693 |
| FAM173B  | 0.076259474  | 0.083824 | 0.121491 |
| FAM174A  | -0.158063966 | 0.000317 | 0.000737 |
| FAM174B  | -0.231098004 | 1.14E-07 | 4.64E-07 |
| FAM175A  | 0.055965117  | 0.204813 | 0.267621 |
| FAM175B  | 0.294729832  | 8.83E-12 | 6.66E-11 |
| FAM176A  | -0.163519954 | 0.000194 | 0.00047  |
| FAM176B  | 0.025461739  | 0.564272 | 0.633206 |
| FAM177A1 | 0.100599597  | 0.022418 | 0.03697  |
| FAM177B  | 0.084850461  | 0.05431  | 0.082463 |
| FAM178A  | -0.165332072 | 0.000164 | 0.000403 |
| FAM178B  | -0.030813159 | 0.485347 | 0.558949 |
| FAM179A  | -0.320478505 | 9.15E-14 | 9.32E-13 |
| FAM179B  | -0.000499922 | 0.99097  | 0.993356 |
| FAM180A  | -0.153221239 | 0.000484 | 0.001088 |
| FAM180B  | -0.237892109 | 4.65E-08 | 2.01E-07 |
| FAM181A  | -0.184486086 | 2.52E-05 | 7.08E-05 |
| FAM181B  | -0.201680358 | 3.96E-06 | 1.26E-05 |
| FAM182A  | -0.274444952 | 2.37E-10 | 1.45E-09 |
| FAM182B  | -0.367248818 | 6.88E-18 | 1.32E-16 |
| FAM183A  | -0.20161202  | 4.00E-06 | 1.27E-05 |
| FAM183B  | -0.275092044 | 2.14E-10 | 1.31E-09 |
| FAM184A  | -0.469241586 | 1.47E-29 | 1.53E-27 |
| FAM184B  | -0.007792182 | 0.859975 | 0.889801 |
| FAM185A  | -0.010715531 | 0.808323 | 0.846746 |

|          |              |          |          |
|----------|--------------|----------|----------|
| FAM186A  | -0.205201791 | 2.66E-06 | 8.70E-06 |
| FAM186B  | -0.122398071 | 0.005413 | 0.010106 |
| FAM187B  | -0.17502107  | 6.52E-05 | 0.000171 |
| FAM188A  | -0.072307324 | 0.101198 | 0.143819 |
| FAM188B  | -0.19894006  | 5.38E-06 | 1.68E-05 |
| FAM189A1 | -0.138102546 | 0.001681 | 0.003434 |
| FAM189A2 | -0.460585274 | 2.09E-28 | 1.79E-26 |
| FAM189B  | 0.234489836  | 7.30E-08 | 3.06E-07 |
| FAM18A   | -0.178565669 | 4.60E-05 | 0.000123 |
| FAM18B2  | 0.087881247  | 0.046223 | 0.071233 |
| FAM18B   | 0.192574141  | 1.08E-05 | 3.21E-05 |
| FAM190A  | -0.206214508 | 2.37E-06 | 7.82E-06 |
| FAM190B  | -0.002397313 | 0.956719 | 0.966975 |
| FAM192A  | 0.001089513  | 0.980322 | 0.9854   |
| FAM193A  | -0.212505284 | 1.14E-06 | 3.94E-06 |
| FAM193B  | -0.422241201 | 1.10E-23 | 5.00E-22 |
| FAM194A  | -0.025767846 | 0.559596 | 0.628948 |
| FAM194B  | -0.016086869 | 0.715704 | 0.768658 |
| FAM195A  | 0.052277926  | 0.236293 | 0.302953 |
| FAM195B  | -0.064447451 | 0.14415  | 0.196929 |
| FAM196A  | 0.230193622  | 1.28E-07 | 5.17E-07 |
| FAM196B  | 0.074482315  | 0.091313 | 0.131163 |
| FAM197Y2 | 0.043091113  | 0.329079 | 0.402499 |
| FAM198A  | -0.353562208 | 1.31E-16 | 2.05E-15 |
| FAM198B  | 0.085890766  | 0.051411 | 0.078442 |
| FAM199X  | 0.278230633  | 1.31E-10 | 8.29E-10 |
| FAM19A1  | -0.143317233 | 0.001109 | 0.002341 |
| FAM19A2  | -0.213862915 | 9.67E-07 | 3.41E-06 |
| FAM19A3  | -0.010230012 | 0.81685  | 0.853799 |
| FAM19A4  | -0.060134469 | 0.173013 | 0.231162 |
| FAM19A5  | -0.048016726 | 0.276749 | 0.347269 |
| FAM200A  | 0.098819426  | 0.024922 | 0.040698 |
| FAM200B  | -0.102546179 | 0.019932 | 0.033219 |
| FAM20A   | -0.237364104 | 4.99E-08 | 2.15E-07 |
| FAM20B   | 0.170294881  | 0.000103 | 0.000262 |
| FAM20C   | -0.064004688 | 0.146932 | 0.200155 |
| FAM21A   | -0.07642618  | 0.083148 | 0.120659 |
| FAM21B   | -0.146786422 | 0.000834 | 0.001799 |
| FAM21C   | -0.145979726 | 0.000892 | 0.001912 |
| FAM22A   | -0.271215075 | 3.91E-10 | 2.31E-09 |
| FAM22D   | -0.214266746 | 9.21E-07 | 3.26E-06 |
| FAM22F   | -0.157690601 | 0.000328 | 0.000759 |
| FAM22G   | -0.142520007 | 0.001183 | 0.002483 |
| FAM23A   | -0.179151333 | 4.34E-05 | 0.000117 |

|          |              |          |          |
|----------|--------------|----------|----------|
| FAM24B   | 0.247308225  | 1.29E-08 | 6.07E-08 |
| FAM25A   | 0.176802808  | 5.47E-05 | 0.000145 |
| FAM25B   | 0.113464376  | 0.009967 | 0.017705 |
| FAM26D   | 0.091425802  | 0.038071 | 0.059707 |
| FAM26E   | 0.046715971  | 0.289984 | 0.361157 |
| FAM26F   | 0.025666404  | 0.561144 | 0.630545 |
| FAM27A   | -0.089169294 | 0.043105 | 0.066826 |
| FAM27B   | 0.031940548  | 0.469514 | 0.54325  |
| FAM27C   | -0.065896345 | 0.135328 | 0.186188 |
| FAM27L   | 0.004511418  | 0.918652 | 0.936169 |
| FAM32A   | 0.060403034  | 0.171099 | 0.228849 |
| FAM35A   | 0.25717805   | 3.18E-09 | 1.62E-08 |
| FAM35B2  | 0.162147401  | 0.00022  | 0.000528 |
| FAM35B   | 0.218438834  | 5.57E-07 | 2.04E-06 |
| FAM36A   | 0.090281343  | 0.040559 | 0.06327  |
| FAM38A   | -0.094148257 | 0.03267  | 0.051995 |
| FAM38B   | -0.232563016 | 9.39E-08 | 3.88E-07 |
| FAM3A    | -0.037337179 | 0.397803 | 0.472531 |
| FAM3B    | -0.161861505 | 0.000225 | 0.00054  |
| FAM3C    | 0.148795065  | 0.000706 | 0.001544 |
| FAM3D    | -0.234566012 | 7.22E-08 | 3.03E-07 |
| FAM40A   | -0.197137126 | 6.57E-06 | 2.02E-05 |
| FAM40B   | 0.362453357  | 1.96E-17 | 3.49E-16 |
| FAM41AY1 | -0.008103186 | 0.854448 | 0.88509  |
| FAM41C   | -0.144006564 | 0.001048 | 0.002222 |
| FAM43A   | -0.179178309 | 4.32E-05 | 0.000117 |
| FAM43B   | -0.097302423 | 0.027243 | 0.044124 |
| FAM45A   | 0.284814809  | 4.56E-11 | 3.08E-10 |
| FAM45B   | 0.242472926  | 2.51E-08 | 1.13E-07 |
| FAM46A   | -0.062511772 | 0.156613 | 0.211712 |
| FAM46B   | -0.175871297 | 6.00E-05 | 0.000158 |
| FAM46C   | -0.236479755 | 5.61E-08 | 2.40E-07 |
| FAM46D   | 0.103210414  | 0.01914  | 0.032018 |
| FAM47A   | 0.067007214  | 0.128851 | 0.178061 |
| FAM47B   | -0.019936019 | 0.651726 | 0.711492 |
| FAM47C   | -0.22934674  | 1.42E-07 | 5.71E-07 |
| FAM47E   | -0.288744857 | 2.40E-11 | 1.69E-10 |
| FAM48A   | -0.162970974 | 0.000204 | 0.000492 |
| FAM48B1  | -0.028740707 | 0.515188 | 0.587527 |
| FAM48B2  | 0.011917811  | 0.787306 | 0.829158 |
| FAM49A   | -0.247208587 | 1.31E-08 | 6.15E-08 |
| FAM49B   | 0.317752993  | 1.52E-13 | 1.50E-12 |
| FAM50A   | 0.026902556  | 0.54243  | 0.613189 |
| FAM50B   | -0.072346235 | 0.101014 | 0.143593 |

|         |              |          |          |
|---------|--------------|----------|----------|
| FAM53A  | -0.120231158 | 0.0063   | 0.011611 |
| FAM53B  | -0.22657751  | 2.02E-07 | 7.95E-07 |
| FAM53C  | 0.00671425   | 0.879185 | 0.905459 |
| FAM54A  | 0.461517721  | 1.57E-28 | 1.40E-26 |
| FAM54B  | -0.191206743 | 1.25E-05 | 3.68E-05 |
| FAM55A  | -0.074918566 | 0.089427 | 0.128715 |
| FAM55B  | 0.013316757  | 0.763045 | 0.809412 |
| FAM55C  | -0.048722111 | 0.269745 | 0.339547 |
| FAM55D  | -0.116715468 | 0.008018 | 0.014503 |
| FAM57A  | 0.038141405  | 0.38771  | 0.462522 |
| FAM57B  | -0.004234794 | 0.923624 | 0.940277 |
| FAM58A  | 0.151169676  | 0.000577 | 0.001281 |
| FAM58B  | 0.152043472  | 0.000536 | 0.001195 |
| FAM59A  | -0.118909614 | 0.006902 | 0.012628 |
| FAM5B   | -0.000867235 | 0.984336 | 0.9883   |
| FAM5C   | -0.164007472 | 0.000185 | 0.000451 |
| FAM60A  | 0.39904708   | 4.17E-21 | 1.29E-19 |
| FAM63A  | -0.112510652 | 0.010613 | 0.018736 |
| FAM63B  | -0.066105662 | 0.134089 | 0.184687 |
| FAM64A  | 0.48354001   | 1.55E-31 | 2.25E-29 |
| FAM65A  | -0.175369446 | 6.30E-05 | 0.000165 |
| FAM65B  | -0.31725723  | 1.66E-13 | 1.63E-12 |
| FAM65C  | -0.009578096 | 0.828334 | 0.863365 |
| FAM66A  | -0.26811411  | 6.28E-10 | 3.60E-09 |
| FAM66C  | -0.223724502 | 2.90E-07 | 1.11E-06 |
| FAM66D  | -0.227902762 | 1.71E-07 | 6.78E-07 |
| FAM66E  | -0.167590722 | 0.000133 | 0.000331 |
| FAM69A  | 0.14179299   | 0.001254 | 0.002623 |
| FAM69B  | -0.048209936 | 0.274818 | 0.345172 |
| FAM69C  | -0.01362768  | 0.757684 | 0.804512 |
| FAM70A  | -0.202638283 | 3.56E-06 | 1.14E-05 |
| FAM70B  | -0.125976528 | 0.004192 | 0.007974 |
| FAM71A  | -0.162751527 | 0.000208 | 0.000502 |
| FAM71B  | 0.018367667  | 0.677519 | 0.734953 |
| FAM71C  | -0.099221272 | 0.024336 | 0.039813 |
| FAM71D  | 0.155816607  | 0.000386 | 0.000884 |
| FAM71E1 | -0.064987386 | 0.140813 | 0.192818 |
| FAM71E2 | 0.045336096  | 0.304483 | 0.376283 |
| FAM71F1 | 0.042543621  | 0.335267 | 0.409191 |
| FAM71F2 | -0.165783564 | 0.000157 | 0.000387 |
| FAM72A  | 0.469351365  | 1.42E-29 | 1.49E-27 |
| FAM72B  | 0.481125717  | 3.40E-31 | 4.66E-29 |
| FAM72D  | 0.487095973  | 4.85E-32 | 7.69E-30 |
| FAM73A  | 0.074294096  | 0.092137 | 0.132102 |



|         |              |          |          |
|---------|--------------|----------|----------|
| FAM73B  | -0.262522344 | 1.45E-09 | 7.86E-09 |
| FAM74A1 | -0.191436066 | 1.22E-05 | 3.60E-05 |
| FAM74A3 | -0.197229464 | 6.50E-06 | 2.00E-05 |
| FAM74A4 | -0.114019131 | 0.009607 | 0.01712  |
| FAM75A2 | 0.069445024  | 0.115481 | 0.161708 |
| FAM75A3 | 0.066126696  | 0.133965 | 0.184528 |
| FAM75A5 | 0.091035104  | 0.038905 | 0.060891 |
| FAM75A6 | 0.012532591  | 0.776617 | 0.820213 |
| FAM75C1 | 0.010959371  | 0.804049 | 0.843196 |
| FAM76A  | -0.29151574  | 1.51E-11 | 1.10E-10 |
| FAM76B  | -0.006131585 | 0.889599 | 0.913549 |
| FAM78A  | -0.260962498 | 1.83E-09 | 9.73E-09 |
| FAM78B  | -0.055129962 | 0.211662 | 0.275311 |
| FAM7A2  | -0.063855428 | 0.147878 | 0.201266 |
| FAM7A3  | -0.150309845 | 0.000621 | 0.00137  |
| FAM81A  | 0.080523053  | 0.067868 | 0.100693 |
| FAM81B  | -0.258369063 | 2.67E-09 | 1.38E-08 |
| FAM82A1 | -0.346377985 | 5.80E-16 | 8.32E-15 |
| FAM82A2 | -0.281555749 | 7.71E-11 | 5.05E-10 |
| FAM82B  | 0.142591533  | 0.001176 | 0.00247  |
| FAM83A  | 0.342187081  | 1.36E-15 | 1.85E-14 |
| FAM83B  | 0.132300681  | 0.002627 | 0.005184 |
| FAM83C  | 0.035821925  | 0.417243 | 0.491969 |
| FAM83D  | 0.513632189  | 5.19E-36 | 1.73E-33 |
| FAM83E  | -0.204419242 | 2.91E-06 | 9.46E-06 |
| FAM83F  | 0.191070108  | 1.27E-05 | 3.74E-05 |
| FAM83G  | 0.143956491  | 0.001053 | 0.002229 |
| FAM83H  | 0.141538733  | 0.00128  | 0.002672 |
| FAM84A  | -0.027708864 | 0.530393 | 0.601981 |
| FAM84B  | -0.039548705 | 0.370428 | 0.445253 |
| FAM86A  | 0.115843142  | 0.008504 | 0.015282 |
| FAM86B1 | -0.129670783 | 0.003198 | 0.006213 |
| FAM86B2 | -0.078372084 | 0.075575 | 0.110943 |
| FAM86C  | 0.164551356  | 0.000176 | 0.000431 |
| FAM86D  | -0.054201564 | 0.219468 | 0.283986 |
| FAM89A  | 0.096627505  | 0.028334 | 0.045743 |
| FAM89B  | -0.00827085  | 0.85147  | 0.882601 |
| FAM8A1  | -0.142434469 | 0.001191 | 0.002499 |
| FAM90A1 | -0.032046131 | 0.468046 | 0.541803 |
| FAM90A7 | 0.014281133  | 0.746453 | 0.79506  |
| FAM91A1 | 0.370281394  | 3.51E-18 | 7.02E-17 |
| FAM92A1 | 0.150903884  | 0.000591 | 0.001307 |
| FAM92A3 | 0.099499137  | 0.023939 | 0.039218 |
| FAM92B  | -0.177788533 | 4.97E-05 | 0.000133 |

|         |              |          |          |
|---------|--------------|----------|----------|
| FAM95B1 | -0.362320898 | 2.02E-17 | 3.58E-16 |
| FAM96A  | 0.233165445  | 8.68E-08 | 3.61E-07 |
| FAM96B  | 0.101424947  | 0.021333 | 0.035361 |
| FAM98A  | 0.328023391  | 2.20E-14 | 2.46E-13 |
| FAM98B  | 0.181136857  | 3.55E-05 | 9.72E-05 |
| FAM98C  | -0.142416978 | 0.001193 | 0.002502 |
| FAM99A  | -0.026644103 | 0.546317 | 0.616832 |
| FAM99B  | 0.045577126  | 0.301916 | 0.373619 |
| FAM9A   | 0.113929991  | 0.009664 | 0.017216 |
| FAM9B   | 0.227635807  | 1.77E-07 | 7.00E-07 |
| FAM9C   | 0.033285111  | 0.45101  | 0.525368 |
| FANCA   | 0.231000444  | 1.15E-07 | 4.69E-07 |
| FANCB   | 0.399072191  | 4.14E-21 | 1.29E-19 |
| FANCC   | 0.09692001   | 0.027857 | 0.045034 |
| FANCD2  | 0.314652509  | 2.68E-13 | 2.55E-12 |
| FANCE   | 0.039935487  | 0.365763 | 0.44044  |
| FANCF   | 0.233007835  | 8.86E-08 | 3.68E-07 |
| FANCG   | 0.35600584   | 7.81E-17 | 1.27E-15 |
| FANCI   | 0.434978353  | 3.47E-25 | 1.99E-23 |
| FANCL   | 0.040666262  | 0.357049 | 0.43154  |
| FANCM   | 0.396113904  | 8.54E-21 | 2.50E-19 |
| FANK1   | -0.259844948 | 2.16E-09 | 1.13E-08 |
| FAP     | 0.148688273  | 0.000712 | 0.001556 |
| FAR1    | 0.054188269  | 0.219582 | 0.284114 |
| FAR2    | -0.087601121 | 0.046925 | 0.072186 |
| FARP1   | -0.154333087 | 0.00044  | 0.000997 |
| FARP2   | -0.319052052 | 1.19E-13 | 1.20E-12 |
| FARS2   | 0.031570765  | 0.474676 | 0.548365 |
| FARSA   | 0.198578779  | 5.60E-06 | 1.74E-05 |
| FARSB   | 0.398104872  | 5.25E-21 | 1.60E-19 |
| FASLG   | 0.017378505  | 0.693985 | 0.749966 |
| FASN    | 0.026822975  | 0.543625 | 0.614348 |
| FASTKD1 | 0.225811918  | 2.23E-07 | 8.68E-07 |
| FASTKD2 | 0.237908643  | 4.64E-08 | 2.01E-07 |
| FASTKD3 | 0.067955295  | 0.123515 | 0.171541 |
| FASTKD5 | -0.006470815 | 0.883534 | 0.908674 |
| FASTK   | -0.032216739 | 0.465679 | 0.539491 |
| FAS     | -0.166645981 | 0.000145 | 0.00036  |
| FAT1    | 0.119199817  | 0.006766 | 0.012403 |
| FAT2    | -0.18835623  | 1.69E-05 | 4.88E-05 |
| FAT3    | -0.219814928 | 4.70E-07 | 1.75E-06 |
| FAT4    | -0.373966951 | 1.54E-18 | 3.25E-17 |
| FATE1   | 0.227388024  | 1.83E-07 | 7.21E-07 |
| FAU     | 0.087445159  | 0.04732  | 0.072712 |

|          |              |          |          |
|----------|--------------|----------|----------|
| FBF1     | -0.225886226 | 2.21E-07 | 8.61E-07 |
| FBLIM1   | -0.026234211 | 0.552509 | 0.622382 |
| FBLL1    | -0.071166064 | 0.106715 | 0.150615 |
| FBLN1    | -0.241886454 | 2.72E-08 | 1.22E-07 |
| FBLN2    | -0.133623033 | 0.002376 | 0.004729 |
| FBLN5    | -0.283467043 | 5.67E-11 | 3.78E-10 |
| FBLN7    | -0.046935412 | 0.287722 | 0.358675 |
| FBL      | 0.238068122  | 4.54E-08 | 1.97E-07 |
| FBN1     | 0.033722934  | 0.445074 | 0.519392 |
| FBN2     | 0.093310668  | 0.034257 | 0.054258 |
| FBN3     | -0.227131136 | 1.89E-07 | 7.44E-07 |
| FBP1     | -0.282220123 | 6.93E-11 | 4.57E-10 |
| FBP2     | -0.161839153 | 0.000226 | 0.000541 |
| FBRSL1   | 0.022997036  | 0.602585 | 0.667728 |
| FBRS     | -0.196312168 | 7.19E-06 | 2.20E-05 |
| FBXL12   | -0.220337558 | 4.41E-07 | 1.64E-06 |
| FBXL13   | 0.080040905  | 0.069537 | 0.102925 |
| FBXL14   | 0.185325611  | 2.31E-05 | 6.53E-05 |
| FBXL15   | -0.152475972 | 0.000516 | 0.001155 |
| FBXL16   | -0.214865319 | 8.57E-07 | 3.04E-06 |
| FBXL17   | -0.112935647 | 0.010321 | 0.018272 |
| FBXL18   | 0.130623708  | 0.002979 | 0.005822 |
| FBXL19   | 0.022944458  | 0.603415 | 0.668491 |
| FBXL20   | 0.009070849  | 0.837295 | 0.870707 |
| FBXL21   | 0.038012968  | 0.389312 | 0.464155 |
| FBXL22   | -0.084526215 | 0.055241 | 0.083693 |
| FBXL2    | -0.017513057 | 0.691737 | 0.74786  |
| FBXL3    | -0.127526863 | 0.003745 | 0.007185 |
| FBXL4    | 0.133405502  | 0.002416 | 0.004802 |
| FBXL5    | -0.021927516 | 0.619566 | 0.682797 |
| FBXL6    | -0.006649812 | 0.880336 | 0.906224 |
| FBXL7    | -0.258129041 | 2.77E-09 | 1.43E-08 |
| FBXL8    | -0.290273542 | 1.86E-11 | 1.34E-10 |
| FBXO10   | -0.01784838  | 0.686145 | 0.7428   |
| FBXO11   | -0.056855188 | 0.197691 | 0.259452 |
| FBXO15   | -0.250106995 | 8.73E-09 | 4.21E-08 |
| FBXO16   | -0.006553921 | 0.882049 | 0.90752  |
| FBXO17   | 0.040804524  | 0.355415 | 0.429896 |
| FBXO18   | 0.01223517   | 0.781783 | 0.824562 |
| FBXO21   | 0.093845181  | 0.033237 | 0.05278  |
| FBXO22OS | 0.344433455  | 8.63E-16 | 1.20E-14 |
| FBXO22   | 0.254907704  | 4.41E-09 | 2.22E-08 |
| FBXO24   | -0.291762338 | 1.45E-11 | 1.06E-10 |
| FBXO25   | -0.119633612 | 0.006566 | 0.012064 |

|        |              |          |          |
|--------|--------------|----------|----------|
| FBXO27 | -0.060380517 | 0.171259 | 0.229048 |
| FBXO28 | 0.203834533  | 3.11E-06 | 1.01E-05 |
| FBXO2  | -0.184531913 | 2.51E-05 | 7.05E-05 |
| FBXO30 | 0.285649426  | 3.98E-11 | 2.72E-10 |
| FBXO31 | -0.227412582 | 1.82E-07 | 7.19E-07 |
| FBXO32 | 0.229611033  | 1.37E-07 | 5.54E-07 |
| FBXO33 | 0.15296784   | 0.000495 | 0.00111  |
| FBXO34 | 0.046243149  | 0.294899 | 0.366241 |
| FBXO36 | -0.012069717 | 0.784661 | 0.827031 |
| FBXO38 | -0.291965377 | 1.40E-11 | 1.03E-10 |
| FBXO39 | -0.030419271 | 0.490946 | 0.564226 |
| FBXO3  | -0.152233317 | 0.000527 | 0.001177 |
| FBXO40 | -0.041752896 | 0.344335 | 0.418546 |
| FBXO41 | -0.072183091 | 0.101787 | 0.144446 |
| FBXO42 | -0.24788784  | 1.19E-08 | 5.63E-08 |
| FBXO43 | 0.204667379  | 2.83E-06 | 9.21E-06 |
| FBXO44 | -0.383083018 | 1.90E-19 | 4.62E-18 |
| FBXO45 | 0.406070543  | 7.26E-22 | 2.52E-20 |
| FBXO46 | -0.019087836 | 0.665626 | 0.724174 |
| FBXO47 | 0.083588816  | 0.058007 | 0.087394 |
| FBXO48 | -0.129039748 | 0.003351 | 0.006491 |
| FBXO4  | -0.068066911 | 0.122899 | 0.170851 |
| FBXO5  | 0.409374217  | 3.14E-22 | 1.14E-20 |
| FBXO6  | -0.020453976 | 0.643296 | 0.70396  |
| FBXO7  | -0.14661901  | 0.000846 | 0.001823 |
| FBXO8  | 0.001448458  | 0.973841 | 0.980414 |
| FBXO9  | -0.12598604  | 0.004189 | 0.007969 |
| FBXW10 | -0.04537431  | 0.304075 | 0.375849 |
| FBXW11 | -0.185262892 | 2.33E-05 | 6.57E-05 |
| FBXW12 | 0.040068725  | 0.364164 | 0.438806 |
| FBXW2  | -0.112517848 | 0.010608 | 0.018731 |
| FBXW4  | -0.420022478 | 1.99E-23 | 8.67E-22 |
| FBXW5  | 0.018918166  | 0.668421 | 0.726503 |
| FBXW7  | -0.146588534 | 0.000848 | 0.001826 |
| FBXW8  | -0.026190294 | 0.553175 | 0.622991 |
| FBXW9  | -0.048971263 | 0.267301 | 0.336873 |
| FCAMR  | -0.301818027 | 2.62E-12 | 2.13E-11 |
| FCAR   | 0.026997238  | 0.541009 | 0.611738 |
| FCER1A | -0.401069    | 2.53E-21 | 8.12E-20 |
| FCER1G | -0.049907579 | 0.258251 | 0.326993 |
| FCER2  | -0.269754706 | 4.89E-10 | 2.84E-09 |
| FCF1   | 0.249643941  | 9.32E-09 | 4.48E-08 |
| FCGBP  | -0.427280046 | 2.86E-24 | 1.44E-22 |
| FCGR1A | -0.026290931 | 0.55165  | 0.621625 |

|         |              |          |          |
|---------|--------------|----------|----------|
| FCGR1B  | -0.030528594 | 0.489389 | 0.562663 |
| FCGR1C  | -0.050737868 | 0.250404 | 0.31845  |
| FCGR2A  | -0.099590452 | 0.023809 | 0.03903  |
| FCGR2B  | -0.068335749 | 0.121423 | 0.169047 |
| FCGR2C  | -0.131863499 | 0.002715 | 0.005347 |
| FCGR3A  | 0.029334692  | 0.50654  | 0.57925  |
| FCGR3B  | 0.078107603  | 0.07657  | 0.112247 |
| FCGRT   | -0.387674837 | 6.48E-20 | 1.66E-18 |
| FCHO1   | -0.029248411 | 0.507791 | 0.580316 |
| FCHO2   | -0.144137391 | 0.001037 | 0.0022   |
| FCHSD1  | -0.379449899 | 4.41E-19 | 1.01E-17 |
| FCHSD2  | -0.318269199 | 1.38E-13 | 1.37E-12 |
| FCN1    | -0.26732242  | 7.08E-10 | 4.03E-09 |
| FCN2    | -0.09897811  | 0.024689 | 0.040351 |
| FCN3    | -0.181643228 | 3.37E-05 | 9.27E-05 |
| FCRL1   | -0.289499829 | 2.12E-11 | 1.51E-10 |
| FCRL2   | -0.165511208 | 0.000161 | 0.000397 |
| FCRL3   | -0.247109817 | 1.33E-08 | 6.22E-08 |
| FCRL4   | -0.11907467  | 0.006824 | 0.012504 |
| FCRL5   | -0.004416335 | 0.920361 | 0.937623 |
| FCRL6   | -0.259179946 | 2.38E-09 | 1.24E-08 |
| FCRLA   | -0.110029599 | 0.012472 | 0.021674 |
| FCRLB   | 0.014280605  | 0.746462 | 0.79506  |
| FDFT1   | -0.013248896 | 0.764217 | 0.810268 |
| FDPSL2A | -0.169332808 | 0.000113 | 0.000285 |
| FDPS    | 0.207846218  | 1.96E-06 | 6.57E-06 |
| FDX1L   | -0.041145977 | 0.3514   | 0.425942 |
| FDX1    | 0.040046594  | 0.364429 | 0.439046 |
| FDXACB1 | -0.047817009 | 0.278754 | 0.349303 |
| FDXR    | -0.229486917 | 1.40E-07 | 5.62E-07 |
| FECH    | 0.214452023  | 9.01E-07 | 3.19E-06 |
| FEM1A   | -0.112463033 | 0.010646 | 0.018787 |
| FEM1B   | 0.163603345  | 0.000192 | 0.000467 |
| FEM1C   | -0.226251644 | 2.11E-07 | 8.25E-07 |
| FEN1    | 0.413377705  | 1.13E-22 | 4.40E-21 |
| FER1L4  | 0.022977822  | 0.602888 | 0.66799  |
| FER1L5  | -0.255609423 | 3.99E-09 | 2.01E-08 |
| FER1L6  | 0.036206876  | 0.412252 | 0.486946 |
| FERD3L  | 0.029637552  | 0.502159 | 0.574998 |
| FERMT1  | 0.136694741  | 0.001876 | 0.003798 |
| FERMT2  | 0.205422472  | 2.59E-06 | 8.50E-06 |
| FERMT3  | -0.215564555 | 7.88E-07 | 2.81E-06 |
| FER     | 0.031215082  | 0.47967  | 0.553559 |
| FES     | -0.197213692 | 6.51E-06 | 2.01E-05 |

|          |              |          |          |
|----------|--------------|----------|----------|
| FETUB    | 0.126204672  | 0.004123 | 0.007856 |
| FEV      | 0.060154452  | 0.17287  | 0.231002 |
| FEZ1     | -0.201837038 | 3.90E-06 | 1.24E-05 |
| FEZ2     | -0.057327026 | 0.19399  | 0.255097 |
| FEZF1    | -0.123604223 | 0.00497  | 0.009341 |
| FEZF2    | -0.065743835 | 0.136237 | 0.187284 |
| FFAR1    | -0.105505484 | 0.016613 | 0.02814  |
| FFAR2    | 0.080612479  | 0.067562 | 0.100284 |
| FFAR3    | 0.008583932  | 0.845917 | 0.878119 |
| FGA      | 0.288352414  | 2.56E-11 | 1.79E-10 |
| FGB      | 0.331748788  | 1.07E-14 | 1.26E-13 |
| FGD1     | 0.166404287  | 0.000148 | 0.000367 |
| FGD2     | -0.306901304 | 1.08E-12 | 9.39E-12 |
| FGD3     | -0.361936974 | 2.19E-17 | 3.87E-16 |
| FGD4     | -0.190382184 | 1.36E-05 | 4.00E-05 |
| FGD5     | -0.308987524 | 7.43E-13 | 6.64E-12 |
| FGD6     | -0.004971548 | 0.910388 | 0.929928 |
| FGF10    | -0.196188894 | 7.29E-06 | 2.23E-05 |
| FGF11    | 0.087983514  | 0.045968 | 0.07088  |
| FGF12    | 0.190584853  | 1.33E-05 | 3.92E-05 |
| FGF13    | -0.117447112 | 0.007629 | 0.013849 |
| FGF14    | -0.346038695 | 6.22E-16 | 8.87E-15 |
| FGF16    | -0.008684223 | 0.84414  | 0.876639 |
| FGF17    | -0.280523854 | 9.10E-11 | 5.90E-10 |
| FGF18    | -0.236711436 | 5.44E-08 | 2.32E-07 |
| FGF19    | 0.050700518  | 0.250754 | 0.318834 |
| FGF1     | -0.082847635 | 0.060275 | 0.090531 |
| FGF20    | -0.21503358  | 8.40E-07 | 2.99E-06 |
| FGF21    | 0.184002849  | 2.65E-05 | 7.42E-05 |
| FGF22    | -0.16640282  | 0.000148 | 0.000368 |
| FGF23    | 0.167740416  | 0.000131 | 0.000327 |
| FGF2     | -0.142410996 | 0.001193 | 0.002503 |
| FGF3     | 0.102585164  | 0.019885 | 0.033154 |
| FGF4     | 0.06111142   | 0.166125 | 0.222987 |
| FGF5     | 0.303473965  | 1.97E-12 | 1.64E-11 |
| FGF7     | -0.093518804 | 0.033857 | 0.053692 |
| FGF8     | 0.003317216  | 0.940138 | 0.952818 |
| FGF9     | -0.244051507 | 2.02E-08 | 9.25E-08 |
| FGFBP1   | 0.040261896  | 0.361854 | 0.436414 |
| FGFBP2   | -0.218736301 | 5.37E-07 | 1.97E-06 |
| FGFBP3   | -0.098202271 | 0.025845 | 0.042077 |
| FGFR1OP2 | 0.18532785   | 2.31E-05 | 6.53E-05 |
| FGFR1OP  | 0.131177297  | 0.002859 | 0.005601 |
| FGFR1    | -0.112911381 | 0.010337 | 0.018293 |

|          |              |          |          |
|----------|--------------|----------|----------|
| FGFR2    | -0.431722699 | 8.52E-25 | 4.59E-23 |
| FGFR3    | -0.356531461 | 6.99E-17 | 1.15E-15 |
| FGFR4    | -0.124989187 | 0.004501 | 0.008522 |
| FGFRL1   | 0.028716844  | 0.515538 | 0.587858 |
| FGGY     | -0.201312924 | 4.13E-06 | 1.31E-05 |
| FGG      | 0.23605134   | 5.94E-08 | 2.53E-07 |
| FGL1     | 0.25668273   | 3.42E-09 | 1.74E-08 |
| FGL2     | -0.213054548 | 1.06E-06 | 3.72E-06 |
| FGR      | -0.267676116 | 6.71E-10 | 3.83E-09 |
| FHAD1    | -0.23643657  | 5.64E-08 | 2.41E-07 |
| FHDC1    | -0.360726621 | 2.85E-17 | 4.97E-16 |
| FHIT     | -0.213011617 | 1.07E-06 | 3.74E-06 |
| FHL1     | -0.340614604 | 1.87E-15 | 2.48E-14 |
| FHL2     | 0.197621818  | 6.23E-06 | 1.92E-05 |
| FHL3     | 0.028427649  | 0.519777 | 0.592064 |
| FHL5     | -0.27295771  | 2.99E-10 | 1.79E-09 |
| FHOD1    | -0.294890272 | 8.59E-12 | 6.50E-11 |
| FHOD3    | 0.058756877  | 0.183085 | 0.242624 |
| FH       | 0.279119638  | 1.14E-10 | 7.25E-10 |
| FIBCD1   | 0.044606308  | 0.312341 | 0.384379 |
| FIBIN    | -0.09796983  | 0.0262   | 0.04261  |
| FIBP     | 0.090894879  | 0.039209 | 0.061318 |
| FICD     | -0.019001023 | 0.667055 | 0.725532 |
| FIG4     | -0.27087862  | 4.12E-10 | 2.42E-09 |
| FIGF     | -0.407826498 | 4.66E-22 | 1.64E-20 |
| FIGLA    | -0.083974547 | 0.056856 | 0.085859 |
| FIGNL1   | 0.208936912  | 1.73E-06 | 5.84E-06 |
| FIGNL2   | -0.167691827 | 0.000132 | 0.000329 |
| FIGN     | 0.212261463  | 1.17E-06 | 4.05E-06 |
| FILIP1L  | -0.193720744 | 9.53E-06 | 2.86E-05 |
| FILIP1   | -0.176401536 | 5.70E-05 | 0.00015  |
| FIP1L1   | 0.223208575  | 3.09E-07 | 1.18E-06 |
| FIS1     | 0.062055407  | 0.159666 | 0.215345 |
| FITM1    | -0.305529298 | 1.37E-12 | 1.18E-11 |
| FITM2    | -0.049722764 | 0.26002  | 0.328859 |
| FIZ1     | -0.166901069 | 0.000142 | 0.000352 |
| FJX1     | 0.124317002  | 0.004723 | 0.008917 |
| FKBP10   | 0.276967085  | 1.60E-10 | 9.96E-10 |
| FKBP11   | 0.115962234  | 0.008436 | 0.015176 |
| FKBP14   | 0.231245519  | 1.11E-07 | 4.56E-07 |
| FKBP15   | -0.263547495 | 1.25E-09 | 6.81E-09 |
| FKBP1AP1 | -0.0136517   | 0.75727  | 0.804182 |
| FKBP1A   | 0.131167164  | 0.002861 | 0.005604 |
| FKBP1B   | 0.075474943  | 0.087067 | 0.125743 |

|          |              |          |          |
|----------|--------------|----------|----------|
| FKBP2    | -0.016484214 | 0.708998 | 0.763301 |
| FKBP3    | 0.460520871  | 2.13E-28 | 1.81E-26 |
| FKBP4    | 0.391406823  | 2.66E-20 | 7.27E-19 |
| FKBP5    | 0.05881286   | 0.182667 | 0.242087 |
| FKBP6    | -0.257221437 | 3.16E-09 | 1.62E-08 |
| FKBP7    | 0.015486588  | 0.725878 | 0.777579 |
| FKBP8    | -0.181098072 | 3.56E-05 | 9.76E-05 |
| FKBP9L   | 0.121289128  | 0.005852 | 0.01085  |
| FKBP9    | 0.131377113  | 0.002816 | 0.005526 |
| FKBPL    | 0.20607814   | 2.41E-06 | 7.93E-06 |
| FKRP     | -0.168313462 | 0.000124 | 0.000311 |
| FKSG29   | -0.073219563 | 0.096953 | 0.138352 |
| FKSG83   | -0.155514401 | 0.000397 | 0.000905 |
| FKTN     | 0.103061985  | 0.019315 | 0.032285 |
| FLAD1    | 0.309649152  | 6.60E-13 | 5.95E-12 |
| FLCN     | -0.278362187 | 1.28E-10 | 8.13E-10 |
| FLG2     | -0.084755748 | 0.054581 | 0.082818 |
| FLG      | -0.051423704 | 0.244049 | 0.311458 |
| FLI1     | -0.296148834 | 6.94E-12 | 5.33E-11 |
| FLI1     | -0.126718017 | 0.003973 | 0.007591 |
| FLJ10038 | -0.388076681 | 5.89E-20 | 1.52E-18 |
| FLJ10213 | -0.226098    | 2.15E-07 | 8.40E-07 |
| FLJ10357 | -0.317928281 | 1.47E-13 | 1.45E-12 |
| FLJ10661 | -0.279846418 | 1.01E-10 | 6.53E-10 |
| FLJ11235 | -0.389577025 | 4.12E-20 | 1.10E-18 |
| FLJ12825 | -0.080314146 | 0.068587 | 0.101647 |
| FLJ13197 | -0.412465761 | 1.42E-22 | 5.38E-21 |
| FLJ13224 | -0.089502697 | 0.042328 | 0.065741 |
| FLJ14107 | -0.222552499 | 3.35E-07 | 1.27E-06 |
| FLJ16779 | 0.036396479  | 0.409807 | 0.484487 |
| FLJ22536 | 0.246294333  | 1.49E-08 | 6.92E-08 |
| FLJ23867 | -0.123783479 | 0.004907 | 0.009232 |
| FLJ25363 | 0.155599779  | 0.000394 | 0.000899 |
| FLJ25758 | 0.178178545  | 4.78E-05 | 0.000128 |
| FLJ26850 | -0.220313414 | 4.42E-07 | 1.65E-06 |
| FLJ30679 | 0.093310462  | 0.034258 | 0.054258 |
| FLJ32063 | -0.035637125 | 0.419651 | 0.494309 |
| FLJ33360 | -0.411634315 | 1.76E-22 | 6.60E-21 |
| FLJ33630 | -0.165239049 | 0.000165 | 0.000406 |
| FLJ34503 | -0.250689974 | 8.04E-09 | 3.90E-08 |
| FLJ35024 | -0.094397168 | 0.03221  | 0.051329 |
| FLJ35220 | -0.139508833 | 0.001505 | 0.003101 |
| FLJ35390 | -0.151229891 | 0.000574 | 0.001274 |
| FLJ35776 | 0.03144365   | 0.476457 | 0.550169 |



|          |              |          |          |
|----------|--------------|----------|----------|
| FLJ36000 | 0.062192003  | 0.158748 | 0.21425  |
| FLJ36031 | 0.19118162   | 1.25E-05 | 3.69E-05 |
| FLJ36777 | -0.338724871 | 2.72E-15 | 3.54E-14 |
| FLJ37201 | -0.089862305 | 0.041503 | 0.064628 |
| FLJ37307 | -0.216989938 | 6.64E-07 | 2.40E-06 |
| FLJ37453 | -0.231276881 | 1.11E-07 | 4.54E-07 |
| FLJ37543 | -0.153598388 | 0.000469 | 0.001056 |
| FLJ39582 | -0.022016561 | 0.618145 | 0.681493 |
| FLJ39609 | -0.143148227 | 0.001124 | 0.00237  |
| FLJ39653 | -0.067238901 | 0.127531 | 0.176432 |
| FLJ39739 | 0.149579613  | 0.000661 | 0.001452 |
| FLJ40292 | -0.112855573 | 0.010375 | 0.018354 |
| FLJ40330 | -0.091896906 | 0.037086 | 0.058308 |
| FLJ40504 | 0.029596526  | 0.502751 | 0.575515 |
| FLJ40852 | -0.186048665 | 2.15E-05 | 6.10E-05 |
| FLJ41941 | -0.032972238 | 0.455278 | 0.529291 |
| FLJ42289 | -0.251876843 | 6.80E-09 | 3.33E-08 |
| FLJ42393 | -0.061738207 | 0.161815 | 0.217817 |
| FLJ42627 | -0.185673633 | 2.23E-05 | 6.32E-05 |
| FLJ42709 | -0.158603697 | 0.000302 | 0.000705 |
| FLJ42875 | -0.463683085 | 8.15E-29 | 7.47E-27 |
| FLJ43390 | -0.235856226 | 6.09E-08 | 2.59E-07 |
| FLJ43663 | -0.232601303 | 9.34E-08 | 3.86E-07 |
| FLJ43859 | 0.126579068  | 0.004013 | 0.007661 |
| FLJ43860 | -0.13268456  | 0.002552 | 0.005048 |
| FLJ43950 | 0.024105696  | 0.585207 | 0.651831 |
| FLJ44054 | 0.086076021  | 0.050908 | 0.077755 |
| FLJ44606 | -0.27345802  | 2.77E-10 | 1.67E-09 |
| FLJ44635 | 0.05805459   | 0.188383 | 0.248837 |
| FLJ45079 | -0.166660192 | 0.000145 | 0.000359 |
| FLJ45244 | -0.276018582 | 1.86E-10 | 1.15E-09 |
| FLJ45340 | -0.339395371 | 2.38E-15 | 3.13E-14 |
| FLJ45445 | -0.182652684 | 3.04E-05 | 8.43E-05 |
| FLJ45983 | -0.040831388 | 0.355098 | 0.429643 |
| FLJ46111 | 0.134248922  | 0.002265 | 0.004523 |
| FLJ46321 | -0.029136322 | 0.50942  | 0.581878 |
| FLJ46361 | -0.026779756 | 0.544275 | 0.614978 |
| FLJ90757 | -0.373571302 | 1.68E-18 | 3.51E-17 |
| FLNA     | -0.219771461 | 4.73E-07 | 1.76E-06 |
| FLNB     | -0.070641891 | 0.109327 | 0.153976 |
| FLNC     | 0.228884704  | 1.51E-07 | 6.03E-07 |
| FLOT1    | 0.07316288   | 0.097213 | 0.138703 |
| FLOT2    | -0.116712644 | 0.008019 | 0.014504 |
| FLRT1    | -0.062337578 | 0.157773 | 0.213108 |

|         |              |          |          |
|---------|--------------|----------|----------|
| FLRT2   | 0.091781929  | 0.037324 | 0.058632 |
| FLRT3   | -0.128506803 | 0.003486 | 0.006725 |
| FLT1    | 0.076363673  | 0.083401 | 0.120965 |
| FLT3LG  | -0.311588954 | 4.66E-13 | 4.28E-12 |
| FLT3    | -0.291932102 | 1.41E-11 | 1.04E-10 |
| FLT4    | -0.140471592 | 0.001394 | 0.002888 |
| FLVCR1  | 0.237093656  | 5.17E-08 | 2.22E-07 |
| FLVCR2  | -0.045866671 | 0.298852 | 0.370263 |
| FLYWCH1 | -0.331303745 | 1.17E-14 | 1.36E-13 |
| FLYWCH2 | -0.14013747  | 0.001431 | 0.00296  |
| FMN1    | -0.21379453  | 9.75E-07 | 3.43E-06 |
| FMN2    | -0.148610718 | 0.000717 | 0.001565 |
| FMNL1   | -0.098702933 | 0.025094 | 0.040952 |
| FMNL2   | -0.197544281 | 6.28E-06 | 1.94E-05 |
| FMNL3   | -0.259116706 | 2.40E-09 | 1.25E-08 |
| FMO1    | 0.042398328  | 0.336922 | 0.410871 |
| FMO2    | -0.302605786 | 2.29E-12 | 1.88E-11 |
| FMO3    | -0.264575309 | 1.07E-09 | 5.92E-09 |
| FMO4    | -0.442869093 | 3.77E-26 | 2.48E-24 |
| FMO5    | -0.237298151 | 5.03E-08 | 2.16E-07 |
| FMO6P   | -0.133314982 | 0.002433 | 0.00483  |
| FMO9P   | 0.064666194  | 0.142791 | 0.195258 |
| FMOD    | -0.082699451 | 0.060737 | 0.091177 |
| FMR1NB  | 0.007780914  | 0.860176 | 0.889963 |
| FMR1    | -0.116941229 | 0.007896 | 0.014297 |
| FN1     | 0.055379176  | 0.209601 | 0.273003 |
| FN3KRP  | -0.030016187 | 0.496711 | 0.569869 |
| FN3K    | -0.121893135 | 0.005609 | 0.010444 |
| FNBP1L  | -0.033103077 | 0.453491 | 0.527673 |
| FNBP1   | -0.219465296 | 4.91E-07 | 1.82E-06 |
| FNBP4   | -0.289388286 | 2.16E-11 | 1.53E-10 |
| FNDC1   | 0.096223388  | 0.029005 | 0.046698 |
| FNDC3A  | 0.050833553  | 0.249511 | 0.317435 |
| FNDC3B  | 0.203254149  | 3.32E-06 | 1.07E-05 |
| FNDC4   | 0.133065357  | 0.002479 | 0.004913 |
| FNDC5   | -0.308259425 | 8.46E-13 | 7.49E-12 |
| FNDC7   | -0.065988668 | 0.134781 | 0.185511 |
| FNDC8   | -0.009541147 | 0.828986 | 0.863909 |
| FNIP1   | -0.132499022 | 0.002588 | 0.005112 |
| FNIP2   | -0.324424178 | 4.37E-14 | 4.68E-13 |
| FNTA    | 0.230978227  | 1.15E-07 | 4.70E-07 |
| FNTB    | 0.077888696  | 0.077402 | 0.113265 |
| FOLH1B  | 0.104354911  | 0.017841 | 0.030027 |
| FOLH1   | 0.113249221  | 0.010109 | 0.017929 |

|         |              |          |          |
|---------|--------------|----------|----------|
| FOLR1   | -0.332638699 | 9.03E-15 | 1.07E-13 |
| FOLR2   | -0.19183085  | 1.17E-05 | 3.46E-05 |
| FOLR3   | -0.082449349 | 0.061524 | 0.09224  |
| FOLR4   | -0.140145201 | 0.001431 | 0.002959 |
| FOSB    | -0.263059339 | 1.34E-09 | 7.29E-09 |
| FOSL1   | 0.294143775  | 9.75E-12 | 7.31E-11 |
| FOSL2   | 0.026102007  | 0.554514 | 0.624113 |
| FOS     | -0.257194624 | 3.17E-09 | 1.62E-08 |
| FOXA1   | 0.128525658  | 0.003481 | 0.006717 |
| FOXA2   | -0.297825847 | 5.22E-12 | 4.06E-11 |
| FOXA3   | 0.096612668  | 0.028358 | 0.045778 |
| FOXB1   | 0.006060335  | 0.890874 | 0.91467  |
| FOXB2   | 0.037363544  | 0.39747  | 0.472248 |
| FOXC1   | -0.137331845 | 0.001785 | 0.003629 |
| FOXC2   | -0.063689591 | 0.148936 | 0.202526 |
| FOXD1   | 0.070012343  | 0.112531 | 0.158021 |
| FOXD2   | -0.048390371 | 0.273024 | 0.343155 |
| FOXD3   | 0.065244391  | 0.139245 | 0.190933 |
| FOXD4L1 | -0.197811148 | 6.10E-06 | 1.89E-05 |
| FOXD4L2 | -0.209457652 | 1.63E-06 | 5.51E-06 |
| FOXD4L3 | -0.154009655 | 0.000452 | 0.001022 |
| FOXD4L5 | -0.134074463 | 0.002296 | 0.00458  |
| FOXD4L6 | -0.237272133 | 5.05E-08 | 2.17E-07 |
| FOXD4   | -0.177366499 | 5.18E-05 | 0.000138 |
| FOXE1   | 0.006324461  | 0.88615  | 0.910602 |
| FOXE3   | 0.033715707  | 0.445172 | 0.519475 |
| FOXF1   | -0.334116357 | 6.76E-15 | 8.23E-14 |
| FOXF2   | -0.308508427 | 8.10E-13 | 7.20E-12 |
| FOXG1   | 0.149968033  | 0.000639 | 0.001407 |
| FOXH1   | 0.096794345  | 0.028061 | 0.045342 |
| FOXI1   | -0.192781567 | 1.05E-05 | 3.15E-05 |
| FOXI2   | -0.315358952 | 2.35E-13 | 2.26E-12 |
| FOXI3   | 0.038838067  | 0.379094 | 0.45382  |
| FOXJ1   | -0.255743677 | 3.91E-09 | 1.98E-08 |
| FOXJ2   | -0.12637815  | 0.004072 | 0.007764 |
| FOXJ3   | -0.019045578 | 0.666322 | 0.724852 |
| FOXK1   | -0.003895118 | 0.929734 | 0.945053 |
| FOXK2   | 0.142277779  | 0.001206 | 0.002528 |
| FOXL1   | -0.023023957 | 0.60216  | 0.667347 |
| FOXL2   | 0.103525296  | 0.018775 | 0.031467 |
| FOXN1   | 0.508047836  | 3.80E-35 | 1.12E-32 |
| FOXN1   | -0.183429976 | 2.81E-05 | 7.82E-05 |
| FOXN2   | 0.156487449  | 0.000364 | 0.000837 |
| FOXN3   | -0.30782974  | 9.13E-13 | 8.05E-12 |

|          |              |          |          |
|----------|--------------|----------|----------|
| FOXN4    | -0.024749196 | 0.575227 | 0.642865 |
| FOXO1    | -0.16979033  | 0.000108 | 0.000274 |
| FOXO3B   | -0.231896447 | 1.02E-07 | 4.21E-07 |
| FOXO3    | -0.27167714  | 3.64E-10 | 2.16E-09 |
| FOXO4    | -0.275957821 | 1.87E-10 | 1.16E-09 |
| FOXP1    | -0.117896961 | 0.007399 | 0.013467 |
| FOXP2    | 0.112833745  | 0.01039  | 0.018377 |
| FOXP3    | -0.131856537 | 0.002716 | 0.005349 |
| FOXP4    | -0.189513521 | 1.49E-05 | 4.36E-05 |
| FOXQ1    | -0.22512602  | 2.43E-07 | 9.41E-07 |
| FOXR1    | 0.016357352  | 0.711136 | 0.765109 |
| FOXR2    | 0.131618467  | 0.002765 | 0.005434 |
| FOXRED1  | 0.052329801  | 0.235828 | 0.302434 |
| FOXRED2  | -9.37E-05    | 0.998308 | 0.999007 |
| FOXS1    | -0.16818904  | 0.000126 | 0.000315 |
| FPGS     | -0.026329686 | 0.551064 | 0.621179 |
| FPGT     | -0.024883206 | 0.573159 | 0.641235 |
| FPR1     | -0.038113502 | 0.388058 | 0.462826 |
| FPR2     | 0.032128301  | 0.466905 | 0.540733 |
| FPR3     | -0.114182499 | 0.009503 | 0.016942 |
| FRAS1    | -0.196873921 | 6.76E-06 | 2.08E-05 |
| FRAT1    | -0.240488877 | 3.28E-08 | 1.45E-07 |
| FRAT2    | 0.095979417  | 0.029417 | 0.047315 |
| FREM1    | -0.232173579 | 9.87E-08 | 4.07E-07 |
| FREM2    | -0.299529563 | 3.90E-12 | 3.08E-11 |
| FRG1B    | -0.072287025 | 0.101294 | 0.143889 |
| FRG1     | 0.09488885   | 0.031319 | 0.050056 |
| FRG2B    | 0.062842765  | 0.154426 | 0.209067 |
| FRG2C    | 0.038712725  | 0.380636 | 0.455223 |
| FRG2     | 0.022451348  | 0.611223 | 0.675465 |
| FRK      | -0.043075019 | 0.32926  | 0.402672 |
| FRMD1    | 0.009370085  | 0.832006 | 0.866289 |
| FRMD3    | -0.049532259 | 0.261853 | 0.330799 |
| FRMD4A   | -0.285924959 | 3.81E-11 | 2.60E-10 |
| FRMD4B   | -0.273710511 | 2.66E-10 | 1.61E-09 |
| FRMD5    | 0.13461265   | 0.002203 | 0.00441  |
| FRMD6    | 0.157609769  | 0.00033  | 0.000764 |
| FRMD7    | 0.035962421  | 0.415417 | 0.490163 |
| FRMD8    | -0.076838774 | 0.081493 | 0.118533 |
| FRMPD1   | -0.144223992 | 0.00103  | 0.002186 |
| FRMPD2L1 | -0.081925904 | 0.063197 | 0.094465 |
| FRMPD2   | -0.094627006 | 0.031791 | 0.050733 |
| FRMPD4   | -0.194270485 | 8.98E-06 | 2.71E-05 |
| FRRS1    | 0.059237069  | 0.179526 | 0.238694 |

|          |              |          |          |
|----------|--------------|----------|----------|
| FRS2     | -0.034360482 | 0.436511 | 0.51092  |
| FRS3     | -0.270421185 | 4.42E-10 | 2.59E-09 |
| FRYL     | -0.1471881   | 0.000807 | 0.001745 |
| FRY      | -0.418060752 | 3.33E-23 | 1.41E-21 |
| FRZB     | -0.308493838 | 8.12E-13 | 7.22E-12 |
| FSCB     | 0.05102608   | 0.24772  | 0.315554 |
| FSCN1    | 0.181169507  | 3.54E-05 | 9.69E-05 |
| FSCN2    | -0.204058781 | 3.03E-06 | 9.82E-06 |
| FSCN3    | -0.140321964 | 0.001411 | 0.002921 |
| FSD1L    | 0.11805867   | 0.007317 | 0.013336 |
| FSD1     | 0.115986497  | 0.008422 | 0.015154 |
| FSD2     | -0.194913103 | 8.38E-06 | 2.54E-05 |
| FSHB     | 0.004377255  | 0.921063 | 0.938148 |
| FSHR     | -0.128114537 | 0.003587 | 0.006902 |
| FSIP1    | -0.036610237 | 0.40706  | 0.48181  |
| FSTL1    | 0.000438822  | 0.992074 | 0.994163 |
| FSTL3    | 0.025158936  | 0.568915 | 0.637272 |
| FSTL4    | 0.045552669  | 0.302176 | 0.373848 |
| FSTL5    | 0.085432964  | 0.05267  | 0.080175 |
| FST      | 0.207767153  | 1.98E-06 | 6.62E-06 |
| FTCD     | 0.000845652  | 0.984726 | 0.988461 |
| FTH1     | 0.042759281  | 0.332821 | 0.406553 |
| FTHL17   | 0.07414271   | 0.092803 | 0.132895 |
| FTHL3    | 0.09845524   | 0.025463 | 0.041506 |
| FTLP10   | -0.033338874 | 0.450278 | 0.524577 |
| FTL      | -0.002687796 | 0.951481 | 0.962345 |
| FTMT     | 0.039340925  | 0.372949 | 0.447772 |
| FTO      | -0.177732661 | 4.99E-05 | 0.000133 |
| FTSJ1    | 0.263725949  | 1.21E-09 | 6.66E-09 |
| FTSJ2    | 0.045204655  | 0.305888 | 0.377623 |
| FTSJ3    | 0.092503465  | 0.035849 | 0.056568 |
| FTSJD1   | 0.01415376   | 0.748638 | 0.797048 |
| FTSJD2   | -0.142140327 | 0.00122  | 0.002554 |
| FUBP1    | 0.23935857   | 3.82E-08 | 1.67E-07 |
| FUBP3    | 0.222725273  | 3.28E-07 | 1.25E-06 |
| FUCA1    | -0.402191707 | 1.92E-21 | 6.29E-20 |
| FUCA2    | 0.336342131  | 4.37E-15 | 5.48E-14 |
| FUK      | -0.259040751 | 2.43E-09 | 1.26E-08 |
| FUNDC1   | 0.022049316  | 0.617622 | 0.681067 |
| FUNDC2P2 | 0.184640549  | 2.48E-05 | 6.98E-05 |
| FUNDC2   | 0.163984949  | 0.000186 | 0.000452 |
| FURIN    | 0.234943444  | 6.87E-08 | 2.90E-07 |
| FUS      | -0.000241215 | 0.995643 | 0.99709  |
| FUT10    | 0.021400322  | 0.628013 | 0.690582 |

|        |              |          |          |
|--------|--------------|----------|----------|
| FUT11  | 0.072299681  | 0.101234 | 0.143835 |
| FUT1   | -0.135770793 | 0.002015 | 0.004064 |
| FUT2   | 0.034319178  | 0.437063 | 0.511446 |
| FUT3   | -0.145669983 | 0.000915 | 0.001958 |
| FUT4   | 0.096232139  | 0.02899  | 0.046685 |
| FUT5   | 0.031601174  | 0.47425  | 0.547937 |
| FUT6   | -0.03601653  | 0.414715 | 0.489421 |
| FUT7   | -0.259394751 | 2.30E-09 | 1.21E-08 |
| FUT8   | 0.080828829  | 0.066826 | 0.099332 |
| FUT9   | -0.042452521 | 0.336304 | 0.410281 |
| FUZ    | -0.126441472 | 0.004053 | 0.007731 |
| FXC1   | -0.120781357 | 0.006063 | 0.011203 |
| FXN    | 0.122434443  | 0.005399 | 0.010086 |
| FXR1   | 0.201911467  | 3.86E-06 | 1.23E-05 |
| FXR2   | 0.027741734  | 0.529905 | 0.601674 |
| FXYD1  | -0.426324511 | 3.70E-24 | 1.83E-22 |
| FXYD2  | -0.040174149 | 0.362902 | 0.43747  |
| FXYD3  | -0.085865758 | 0.051479 | 0.07854  |
| FXYD4  | 0.129051899  | 0.003348 | 0.006486 |
| FXYD5  | -0.162499519 | 0.000213 | 0.000513 |
| FXYD6  | -0.262936068 | 1.37E-09 | 7.41E-09 |
| FXYD7  | -0.301855206 | 2.61E-12 | 2.12E-11 |
| FYB    | -0.103059225 | 0.019318 | 0.032288 |
| FYCO1  | -0.371643778 | 2.59E-18 | 5.26E-17 |
| FYN    | -0.266051987 | 8.57E-10 | 4.81E-09 |
| FYTTD1 | 0.223981608  | 2.81E-07 | 1.08E-06 |
| FZD10  | 0.178534704  | 4.61E-05 | 0.000124 |
| FZD1   | -0.205200134 | 2.66E-06 | 8.70E-06 |
| FZD2   | -0.134760608 | 0.002178 | 0.004366 |
| FZD3   | 0.097918942  | 0.026278 | 0.04272  |
| FZD4   | -0.095797919 | 0.029726 | 0.04779  |
| FZD5   | -0.091427494 | 0.038068 | 0.059706 |
| FZD6   | 0.108100142  | 0.014111 | 0.02429  |
| FZD7   | -0.122048945 | 0.005548 | 0.010338 |
| FZD8   | -0.218650703 | 5.42E-07 | 1.99E-06 |
| FZD9   | 0.017550871  | 0.691105 | 0.747391 |
| FZR1   | -0.059314801 | 0.178955 | 0.238067 |
| G0S2   | 0.057567969  | 0.19212  | 0.253038 |
| G2E3   | 0.415905779  | 5.85E-23 | 2.38E-21 |
| G3BP1  | 0.329380577  | 1.70E-14 | 1.94E-13 |
| G3BP2  | 0.186030585  | 2.15E-05 | 6.11E-05 |
| G6PC2  | -0.092855031 | 0.035148 | 0.055554 |
| G6PC3  | 0.02522371   | 0.56792  | 0.636443 |
| G6PC   | 0.159056495  | 0.00029  | 0.00068  |

|            |              |          |          |
|------------|--------------|----------|----------|
| G6PD       | 0.215427338  | 8.01E-07 | 2.85E-06 |
| GAA        | -0.135815082 | 0.002009 | 0.004051 |
| GAB1       | -0.331535495 | 1.12E-14 | 1.31E-13 |
| GAB2       | -0.162315752 | 0.000216 | 0.00052  |
| GAB3       | -0.390987941 | 2.94E-20 | 8.00E-19 |
| GAB4       | 0.01798956   | 0.683796 | 0.740637 |
| GABARAPL1  | 0.058530278  | 0.184782 | 0.244566 |
| GABARAPL2  | -0.029662473 | 0.5018   | 0.574682 |
| GABARAPL3  | 0.053439113  | 0.226032 | 0.291328 |
| GABARAP    | -0.043790857 | 0.321279 | 0.394164 |
| GABBR1     | -0.339712294 | 2.24E-15 | 2.94E-14 |
| GABBR2     | -0.192711152 | 1.06E-05 | 3.17E-05 |
| GABPA      | -0.008006098 | 0.856172 | 0.886647 |
| GABPB1     | 0.418225479  | 3.19E-23 | 1.36E-21 |
| GABPB2     | -0.05694768  | 0.196962 | 0.258597 |
| GABRA1     | 0.016640733  | 0.706362 | 0.76116  |
| GABRA2     | 0.104587698  | 0.017586 | 0.029631 |
| GABRA3     | 0.163040805  | 0.000202 | 0.00049  |
| GABRA4     | -0.133129146 | 0.002467 | 0.004892 |
| GABRA5     | 0.130574767  | 0.00299  | 0.005841 |
| GABRA6     | 0.009756828  | 0.825182 | 0.860752 |
| GABRB1     | -0.043020171 | 0.329877 | 0.4033   |
| GABRB2     | -0.123747304 | 0.004919 | 0.009252 |
| GABRB3     | -0.015035631 | 0.733553 | 0.784162 |
| GABRD      | -0.078577162 | 0.074811 | 0.109902 |
| GABRE      | -0.309462103 | 6.83E-13 | 6.13E-12 |
| GABRG1     | 0.006660925  | 0.880138 | 0.906113 |
| GABRG2     | 0.153927263  | 0.000456 | 0.001029 |
| GABRG3     | 0.091201715  | 0.038548 | 0.060393 |
| GABRP      | -0.167080584 | 0.000139 | 0.000346 |
| GABRQ      | 0.174194743  | 7.07E-05 | 0.000184 |
| GABRR1     | 0.077012585  | 0.080804 | 0.117702 |
| GABRR2     | -0.207912835 | 1.95E-06 | 6.52E-06 |
| GABRR3     | 0.030697135  | 0.486993 | 0.560424 |
| GAD1       | -0.007602142 | 0.863356 | 0.892607 |
| GAD2       | -0.042852201 | 0.33177  | 0.405369 |
| GADD45A    | -0.002184849 | 0.960551 | 0.96982  |
| GADD45B    | -0.149348081 | 0.000674 | 0.001478 |
| GADD45GIP1 | 0.175685506  | 6.11E-05 | 0.000161 |
| GADD45G    | -0.172397112 | 8.41E-05 | 0.000216 |
| GADL1      | -0.154065348 | 0.00045  | 0.001018 |
| GAGE10     | -0.033993657 | 0.441426 | 0.515737 |
| GAGE12D    | 0.078418888  | 0.0754   | 0.110702 |
| GAGE12F    | 0.048334018  | 0.273583 | 0.343794 |

|         |              |          |          |
|---------|--------------|----------|----------|
| GAGE12J | 0.084505198  | 0.055302 | 0.083772 |
| GAGE13  | 0.037519378  | 0.395503 | 0.470386 |
| GAGE1   | 0.091698323  | 0.037499 | 0.058888 |
| GAGE2A  | 0.068778883  | 0.119021 | 0.165992 |
| GAGE2B  | 0.064541508  | 0.143564 | 0.196184 |
| GAGE2C  | 0.034453206  | 0.435273 | 0.50983  |
| GAGE2D  | 0.093040134  | 0.034784 | 0.055018 |
| GAGE2E  | 0.041745093  | 0.344426 | 0.41863  |
| GAGE4   | 0.086903988  | 0.048712 | 0.074695 |
| GAGE8   | 0.073395682  | 0.09615  | 0.137314 |
| GAK     | -0.072842864 | 0.098689 | 0.140618 |
| GAL3ST1 | -0.106301704 | 0.015807 | 0.026898 |
| GAL3ST2 | 0.035339672  | 0.423545 | 0.498165 |
| GAL3ST3 | 0.040893193  | 0.35437  | 0.428995 |
| GAL3ST4 | -0.080422048 | 0.068215 | 0.101163 |
| GALC    | -0.15365645  | 0.000466 | 0.001051 |
| GALE    | 0.027739843  | 0.529933 | 0.601674 |
| GALK1   | 0.062485335  | 0.156788 | 0.211893 |
| GALK2   | 0.168867055  | 0.000118 | 0.000296 |
| GALM    | -0.036958528 | 0.402609 | 0.477276 |
| GALNS   | -0.017977397 | 0.683998 | 0.740816 |
| GALNT10 | -0.201528554 | 4.03E-06 | 1.28E-05 |
| GALNT11 | -0.254465748 | 4.70E-09 | 2.35E-08 |
| GALNT12 | -0.175801328 | 6.04E-05 | 0.000159 |
| GALNT13 | 0.029840688  | 0.499232 | 0.572237 |
| GALNT14 | 0.143254357  | 0.001115 | 0.002352 |
| GALNT1  | 0.133871621  | 0.002332 | 0.004645 |
| GALNT2  | 0.215940751  | 7.53E-07 | 2.69E-06 |
| GALNT3  | -0.005879347 | 0.894114 | 0.917148 |
| GALNT4  | 0.284356564  | 4.91E-11 | 3.30E-10 |
| GALNT5  | -0.146859262 | 0.000829 | 0.001789 |
| GALNT6  | 0.106819614  | 0.015301 | 0.026122 |
| GALNT7  | 0.151933064  | 0.000541 | 0.001205 |
| GALNT8  | -0.025854266 | 0.55828  | 0.62775  |
| GALNT9  | 0.004628644  | 0.916546 | 0.93469  |
| GALNTL1 | -0.362282168 | 2.04E-17 | 3.61E-16 |
| GALNTL2 | -0.039559795 | 0.370293 | 0.445139 |
| GALNTL4 | -0.321174375 | 8.04E-14 | 8.24E-13 |
| GALNTL5 | -0.02641619  | 0.549756 | 0.620049 |
| GALNTL6 | 0.008802543  | 0.842044 | 0.874917 |
| GALP    | 0.099335681  | 0.024172 | 0.039576 |
| GALR1   | 0.024151412  | 0.584495 | 0.651184 |
| GALR2   | -0.032558773 | 0.460954 | 0.534863 |
| GALR3   | 0.120382839  | 0.006234 | 0.011497 |



|         |              |          |          |
|---------|--------------|----------|----------|
| GALT    | -0.21441477  | 9.05E-07 | 3.20E-06 |
| GAL     | 0.414777967  | 7.84E-23 | 3.11E-21 |
| GAMT    | -0.074411507 | 0.091622 | 0.131477 |
| GANAB   | 0.192414977  | 1.10E-05 | 3.26E-05 |
| GANC    | -0.384836249 | 1.26E-19 | 3.15E-18 |
| GAN     | 0.224827588  | 2.52E-07 | 9.75E-07 |
| GAP43   | 0.131682448  | 0.002752 | 0.005413 |
| GAPDHS  | -0.15715367  | 0.000344 | 0.000793 |
| GAPDH   | 0.463787079  | 7.90E-29 | 7.27E-27 |
| GAPT    | -0.341246063 | 1.64E-15 | 2.21E-14 |
| GAPVD1  | -0.144941898 | 0.000971 | 0.00207  |
| GAR1    | 0.308372716  | 8.29E-13 | 7.36E-12 |
| GARNL3  | -0.329780444 | 1.57E-14 | 1.81E-13 |
| GARS    | 0.43502657   | 3.42E-25 | 1.97E-23 |
| GART    | 0.360500583  | 2.99E-17 | 5.21E-16 |
| GAS1    | -0.02401221  | 0.586663 | 0.653139 |
| GAS2L1  | 0.059282525  | 0.179192 | 0.238317 |
| GAS2L2  | -0.397394081 | 6.25E-21 | 1.87E-19 |
| GAS2L3  | 0.274545769  | 2.34E-10 | 1.43E-09 |
| GAS2    | 0.001540411  | 0.972181 | 0.979137 |
| GAS5    | 0.120395275  | 0.006228 | 0.011488 |
| GAS6    | -0.339064366 | 2.54E-15 | 3.32E-14 |
| GAS7    | -0.299662891 | 3.81E-12 | 3.02E-11 |
| GAS8    | -0.222855222 | 3.23E-07 | 1.23E-06 |
| GAST    | 0.222753178  | 3.27E-07 | 1.24E-06 |
| GATA1   | -0.377950727 | 6.22E-19 | 1.39E-17 |
| GATA2   | -0.204413219 | 2.91E-06 | 9.46E-06 |
| GATA3   | -0.111086106 | 0.011648 | 0.020376 |
| GATA4   | -0.040332549 | 0.361012 | 0.435743 |
| GATA5   | -0.380920855 | 3.14E-19 | 7.38E-18 |
| GATA6   | -0.328140533 | 2.15E-14 | 2.41E-13 |
| GATAD1  | -0.04620116  | 0.295338 | 0.366657 |
| GATAD2A | -0.019612452 | 0.657015 | 0.716404 |
| GATAD2B | -0.164289039 | 0.000181 | 0.000441 |
| GATC    | 0.313801428  | 3.13E-13 | 2.95E-12 |
| GATM    | -0.110837155 | 0.011838 | 0.020665 |
| GATSL1  | 0.204441277  | 2.90E-06 | 9.44E-06 |
| GATSL2  | 0.11991944   | 0.006437 | 0.011844 |
| GATSL3  | -0.204517728 | 2.88E-06 | 9.36E-06 |
| GATS    | -0.037400793 | 0.396999 | 0.471885 |
| GBA2    | -0.164539948 | 0.000176 | 0.000432 |
| GBA3    | -0.09542187  | 0.030376 | 0.048706 |
| GBAP1   | 0.048199696  | 0.27492  | 0.345243 |
| GBAS    | 0.162492819  | 0.000213 | 0.000513 |

|         |              |          |          |
|---------|--------------|----------|----------|
| GBA     | 0.07783605   | 0.077603 | 0.113536 |
| GBE1    | 0.179535628  | 4.17E-05 | 0.000113 |
| GBF1    | -0.074335105 | 0.091957 | 0.131892 |
| GBGT1   | -0.123122328 | 0.005143 | 0.009644 |
| GBP1    | 0.106869537  | 0.015253 | 0.02605  |
| GBP2    | -0.02994477  | 0.497736 | 0.570718 |
| GBP3    | -0.049999562 | 0.257373 | 0.326109 |
| GBP4    | -0.05504946  | 0.212331 | 0.276037 |
| GBP5    | 0.031359536  | 0.477638 | 0.551437 |
| GBP6    | -0.087976142 | 0.045987 | 0.070903 |
| GBP7    | 0.02784224   | 0.528415 | 0.60052  |
| GBX1    | 0.004238598  | 0.923556 | 0.940255 |
| GBX2    | 0.272575889  | 3.17E-10 | 1.89E-09 |
| GCAT    | -0.072441569 | 0.100564 | 0.142995 |
| GCA     | -0.084197569 | 0.056198 | 0.084975 |
| GCC1    | 0.02502703   | 0.570944 | 0.639078 |
| GCC2    | -0.234112205 | 7.67E-08 | 3.21E-07 |
| GCDH    | -0.176919016 | 5.41E-05 | 0.000143 |
| GCET2   | -0.363948625 | 1.42E-17 | 2.58E-16 |
| GCFC1   | -0.194398614 | 8.86E-06 | 2.67E-05 |
| GCGR    | -0.012075861 | 0.784554 | 0.827005 |
| GCG     | 0.066536274  | 0.131567 | 0.181462 |
| GCH1    | 0.337439719  | 3.51E-15 | 4.48E-14 |
| GCHFR   | -0.098092804 | 0.026011 | 0.042325 |
| GCKR    | 0.09257759   | 0.0357   | 0.056355 |
| GCK     | -0.104831409 | 0.017323 | 0.029212 |
| GCLC    | 0.289093488  | 2.26E-11 | 1.60E-10 |
| GCLM    | 0.330570659  | 1.35E-14 | 1.56E-13 |
| GCM1    | -0.07224647  | 0.101486 | 0.144101 |
| GCM2    | -0.019909756 | 0.652155 | 0.711882 |
| GCN1L1  | 0.194010991  | 9.24E-06 | 2.78E-05 |
| GCNT1   | -0.074274192 | 0.092224 | 0.132208 |
| GCNT2   | 0.076981131  | 0.080928 | 0.117856 |
| GCNT3   | 0.044347205  | 0.315163 | 0.387494 |
| GCNT4   | -0.307351568 | 9.94E-13 | 8.72E-12 |
| GCNT7   | -0.236780366 | 5.39E-08 | 2.30E-07 |
| GCOM1   | -0.180400738 | 3.82E-05 | 0.000104 |
| GCSH    | 0.300759383  | 3.15E-12 | 2.54E-11 |
| GC      | -0.069702037 | 0.114137 | 0.16004  |
| GDAP1L1 | -0.17830721  | 4.72E-05 | 0.000126 |
| GDAP1   | 0.016638455  | 0.7064   | 0.76116  |
| GDAP2   | -0.011214911 | 0.799576 | 0.839563 |
| GDA     | 0.060219218  | 0.172407 | 0.230445 |
| GDE1    | -0.187076853 | 1.93E-05 | 5.53E-05 |

|          |              |          |          |
|----------|--------------|----------|----------|
| GDEP     | -0.089177232 | 0.043087 | 0.066808 |
| GDF10    | -0.30253472  | 2.32E-12 | 1.90E-11 |
| GDF11    | -0.05814747  | 0.187676 | 0.248034 |
| GDF15    | -0.327813676 | 2.29E-14 | 2.56E-13 |
| GDF1     | 0.104357483  | 0.017838 | 0.030025 |
| GDF2     | -0.147780489 | 0.000768 | 0.001668 |
| GDF3     | -0.106990699 | 0.015137 | 0.025882 |
| GDF5     | -0.239604451 | 3.70E-08 | 1.62E-07 |
| GDF6     | 0.030561063  | 0.488926 | 0.562171 |
| GDF7     | -0.257528962 | 3.02E-09 | 1.55E-08 |
| GDF9     | -0.169238362 | 0.000114 | 0.000287 |
| GDI1     | -0.039382122 | 0.372448 | 0.447251 |
| GDI2     | 0.34419358   | 9.06E-16 | 1.26E-14 |
| GDNF     | 0.018276241  | 0.679035 | 0.736318 |
| GDPD1    | -0.054858081 | 0.213927 | 0.277913 |
| GDPD2    | -0.066277861 | 0.133076 | 0.183389 |
| GDPD3    | -0.015012828 | 0.733942 | 0.784536 |
| GDPD4    | -0.021708584 | 0.623068 | 0.685993 |
| GDPD5    | -0.260368376 | 2.00E-09 | 1.05E-08 |
| GEFT     | -0.117759011 | 0.007469 | 0.013577 |
| GEMIN4   | 0.011219094  | 0.799502 | 0.839546 |
| GEMIN5   | 0.056157311  | 0.20326  | 0.265852 |
| GEMIN6   | 0.352241921  | 1.73E-16 | 2.66E-15 |
| GEMIN7   | 0.306494189  | 1.16E-12 | 1.00E-11 |
| GEMIN8P4 | 0.11223055   | 0.01081  | 0.019059 |
| GEMIN8   | -0.177340973 | 5.19E-05 | 0.000138 |
| GEM      | -0.006741428 | 0.8787   | 0.905193 |
| GEN1     | 0.212416415  | 1.15E-06 | 3.98E-06 |
| GET4     | -0.005424375 | 0.902265 | 0.923519 |
| GFAP     | 0.07913169   | 0.072776 | 0.107142 |
| GFER     | 0.03664302   | 0.40664  | 0.481427 |
| GFI1B    | -0.3181882   | 1.40E-13 | 1.39E-12 |
| GFI1     | -0.057270711 | 0.19443  | 0.255608 |
| GFM1     | 0.282147022  | 7.02E-11 | 4.62E-10 |
| GFM2     | 0.171869308  | 8.85E-05 | 0.000227 |
| GFOD1    | -0.153723426 | 0.000464 | 0.001046 |
| GFOD2    | -0.014469454 | 0.743227 | 0.792257 |
| GFPT1    | 0.162447083  | 0.000214 | 0.000515 |
| GFPT2    | 0.1780379    | 4.84E-05 | 0.00013  |
| GFRA1    | -0.472871294 | 4.73E-30 | 5.31E-28 |
| GFRA2    | -0.303294606 | 2.03E-12 | 1.69E-11 |
| GFRA3    | -0.145776148 | 0.000907 | 0.001942 |
| GFRA4    | 0.050904453  | 0.24885  | 0.316756 |
| GFRAL    | 0.016327901  | 0.711633 | 0.765438 |

|        |              |          |          |
|--------|--------------|----------|----------|
| GGA1   | -0.232655711 | 9.27E-08 | 3.84E-07 |
| GGA2   | -0.536533662 | 9.92E-40 | 7.94E-37 |
| GGA3   | -0.296298728 | 6.77E-12 | 5.20E-11 |
| GGCT   | 0.105510085  | 0.016608 | 0.028137 |
| GGCX   | -0.099725111 | 0.023619 | 0.038748 |
| GGH    | 0.414387934  | 8.67E-23 | 3.43E-21 |
| GGNBP1 | -0.041484673 | 0.347446 | 0.421815 |
| GGNBP2 | -0.109191683 | 0.013162 | 0.022786 |
| GGN    | -0.071792764 | 0.103657 | 0.146734 |
| GGPS1  | 0.120043768  | 0.006382 | 0.011748 |
| GGT1   | -0.241334648 | 2.93E-08 | 1.30E-07 |
| GGT3P  | -0.399356069 | 3.86E-21 | 1.21E-19 |
| GGT5   | -0.279607051 | 1.05E-10 | 6.76E-10 |
| GGT6   | -0.367716734 | 6.21E-18 | 1.20E-16 |
| GGT7   | -0.303821839 | 1.85E-12 | 1.55E-11 |
| GGT8P  | -0.276735989 | 1.66E-10 | 1.03E-09 |
| GGTA1  | -0.262276197 | 1.51E-09 | 8.14E-09 |
| GGTLC1 | -0.444300964 | 2.51E-26 | 1.71E-24 |
| GGTLC2 | -0.256843586 | 3.34E-09 | 1.70E-08 |
| GH1    | -0.068557808 | 0.120215 | 0.167516 |
| GH2    | 0.127676633  | 0.003704 | 0.007111 |
| GHDC   | -0.310620713 | 5.55E-13 | 5.06E-12 |
| GHITM  | 0.313127039  | 3.53E-13 | 3.31E-12 |
| GHRHR  | 0.004643816  | 0.916273 | 0.934507 |
| GHRH   | 0.01442785   | 0.743939 | 0.792932 |
| GHRLOS | -0.201706324 | 3.95E-06 | 1.26E-05 |
| GHRL   | -0.357632095 | 5.53E-17 | 9.21E-16 |
| GHR    | -0.340512703 | 1.90E-15 | 2.53E-14 |
| GHSR   | 0.003365982  | 0.939259 | 0.952121 |
| GIF    | -0.022396739 | 0.612091 | 0.676124 |
| GIGYF1 | -0.288738565 | 2.40E-11 | 1.69E-10 |
| GIGYF2 | -0.146274053 | 0.000871 | 0.00187  |
| GIMAP1 | -0.294049355 | 9.90E-12 | 7.41E-11 |
| GIMAP2 | -0.161611788 | 0.000231 | 0.000552 |
| GIMAP4 | -0.149546639 | 0.000662 | 0.001456 |
| GIMAP5 | -0.145351018 | 0.000939 | 0.002006 |
| GIMAP6 | -0.184555326 | 2.51E-05 | 7.03E-05 |
| GIMAP7 | -0.212977492 | 1.07E-06 | 3.75E-06 |
| GIMAP8 | -0.26595025  | 8.71E-10 | 4.88E-09 |
| GIN1   | -0.094345318 | 0.032305 | 0.051464 |
| GIN51  | 0.45954514   | 2.86E-28 | 2.41E-26 |
| GIN52  | 0.431433411  | 9.22E-25 | 4.94E-23 |
| GIN53  | 0.419859805  | 2.07E-23 | 9.03E-22 |
| GIN54  | 0.391549734  | 2.57E-20 | 7.06E-19 |

|        |              |          |          |
|--------|--------------|----------|----------|
| GIPC1  | -0.061711734 | 0.161995 | 0.218015 |
| GIPC2  | -0.134261513 | 0.002263 | 0.004519 |
| GIPC3  | -0.046435461 | 0.292894 | 0.364145 |
| GIPR   | -0.395629997 | 9.61E-21 | 2.80E-19 |
| GIP    | 0.25070901   | 8.02E-09 | 3.89E-08 |
| GIT1   | 0.067141409  | 0.128085 | 0.177113 |
| GIT2   | -0.172960064 | 7.97E-05 | 0.000206 |
| GIYD2  | -0.059519684 | 0.177456 | 0.236388 |
| GJA10  | 0.074280468  | 0.092197 | 0.132178 |
| GJA1   | 0.090272609  | 0.040578 | 0.063296 |
| GJA3   | 0.050366147  | 0.253896 | 0.322419 |
| GJA4   | -0.129773834 | 0.003174 | 0.006171 |
| GJA5   | -0.062579554 | 0.156163 | 0.21118  |
| GJA8   | 0.021560393  | 0.625443 | 0.688203 |
| GJA9   | -0.054657042 | 0.215613 | 0.279831 |
| GJB1   | -0.204328391 | 2.94E-06 | 9.55E-06 |
| GJB2   | 0.240561091  | 3.25E-08 | 1.44E-07 |
| GJB3   | 0.184406724  | 2.54E-05 | 7.14E-05 |
| GJB4   | 0.027539111  | 0.532916 | 0.604295 |
| GJB5   | 0.080391559  | 0.06832  | 0.101296 |
| GJB6   | 0.027546295  | 0.532809 | 0.604209 |
| GJB7   | 0.041202079  | 0.350743 | 0.425301 |
| GJC1   | 0.122525566  | 0.005365 | 0.010026 |
| GJC2   | -0.233167726 | 8.67E-08 | 3.61E-07 |
| GJC3   | 0.010931842  | 0.804531 | 0.843614 |
| GJD2   | -0.010493392 | 0.812222 | 0.850028 |
| GJD3   | -0.046567476 | 0.291522 | 0.362756 |
| GJD4   | 0.007630244  | 0.862856 | 0.892182 |
| GK2    | -0.019661247 | 0.656216 | 0.71569  |
| GK3P   | 0.074180695  | 0.092636 | 0.132731 |
| GK5    | -0.11142299  | 0.011396 | 0.019996 |
| GKAP1  | -0.095529738 | 0.030189 | 0.048459 |
| GKN1   | -0.045907489 | 0.298422 | 0.369801 |
| GKN2   | -0.171735603 | 8.97E-05 | 0.00023  |
| GK     | 0.044932711  | 0.30881  | 0.380713 |
| GLA    | 0.289321259  | 2.18E-11 | 1.55E-10 |
| GLB1L2 | -0.285606474 | 4.01E-11 | 2.74E-10 |
| GLB1L3 | -0.356827403 | 6.56E-17 | 1.08E-15 |
| GLB1L  | -0.252846939 | 5.92E-09 | 2.93E-08 |
| GLB1   | 0.062087683  | 0.159449 | 0.21511  |
| GLCCI1 | -0.278262844 | 1.30E-10 | 8.25E-10 |
| GLCE   | 0.18468204   | 2.47E-05 | 6.95E-05 |
| GLDC   | 0.309844829  | 6.38E-13 | 5.76E-12 |
| GLDN   | -0.235624853 | 6.28E-08 | 2.66E-07 |

|          |              |          |          |
|----------|--------------|----------|----------|
| GLE1     | 0.001456384  | 0.973698 | 0.980319 |
| GLG1     | -0.028267952 | 0.522126 | 0.59405  |
| GLI1     | -0.244036488 | 2.03E-08 | 9.27E-08 |
| GLI2     | -0.086902578 | 0.048716 | 0.074695 |
| GLI3     | -0.148577239 | 0.000719 | 0.00157  |
| GLI4     | -0.06916154  | 0.116977 | 0.163518 |
| GLIPR1L1 | 0.004527     | 0.918372 | 0.936027 |
| GLIPR1L2 | -0.253037081 | 5.77E-09 | 2.85E-08 |
| GLIPR1   | -0.041775751 | 0.344071 | 0.418276 |
| GLIPR2   | -0.158825384 | 0.000296 | 0.000693 |
| GLIS1    | -0.022773316 | 0.60612  | 0.670938 |
| GLIS2    | -0.239889739 | 3.56E-08 | 1.57E-07 |
| GLIS3    | -0.095749822 | 0.029809 | 0.047899 |
| GLMN     | 0.225660891  | 2.27E-07 | 8.84E-07 |
| GLO1     | 0.113370748  | 0.010028 | 0.017804 |
| GLOD4    | 0.16398692   | 0.000186 | 0.000452 |
| GLOD5    | -0.266619716 | 7.87E-10 | 4.44E-09 |
| GLP1R    | -0.288081222 | 2.67E-11 | 1.87E-10 |
| GLP2R    | -0.027737219 | 0.529972 | 0.601674 |
| GLRA1    | 0.040047195  | 0.364422 | 0.439046 |
| GLRA2    | -0.092097578 | 0.036673 | 0.057708 |
| GLRA3    | -0.063273385 | 0.151615 | 0.205736 |
| GLRA4    | -0.029102532 | 0.509911 | 0.582322 |
| GLRB     | -0.029040408 | 0.510815 | 0.583134 |
| GLRX2    | 0.328599583  | 1.97E-14 | 2.23E-13 |
| GLRX3    | 0.426212902  | 3.81E-24 | 1.88E-22 |
| GLRX5    | 0.357688324  | 5.47E-17 | 9.11E-16 |
| GLRX     | 0.090926066  | 0.039141 | 0.061222 |
| GLS2     | -0.316491602 | 1.91E-13 | 1.86E-12 |
| GLS      | -0.070294432 | 0.111086 | 0.156135 |
| GLT1D1   | -0.045154866 | 0.306422 | 0.378165 |
| GLT25D1  | 0.142938859  | 0.001143 | 0.002407 |
| GLT25D2  | -0.293474977 | 1.09E-11 | 8.11E-11 |
| GLT8D1   | 0.001097198  | 0.980183 | 0.98531  |
| GLT8D2   | 0.008770624  | 0.842609 | 0.875433 |
| GLTPD1   | -0.03694176  | 0.402823 | 0.477501 |
| GLTPD2   | 0.046278233  | 0.294533 | 0.365887 |
| GLTP     | -0.032993842 | 0.454983 | 0.52904  |
| GLTSCR1  | -0.127649525 | 0.003712 | 0.007124 |
| GLTSCR2  | -0.237988219 | 4.59E-08 | 1.99E-07 |
| GLUD1    | 0.21452027   | 8.94E-07 | 3.16E-06 |
| GLUD2    | 0.187309286  | 1.88E-05 | 5.40E-05 |
| GLUL     | -0.166017082 | 0.000154 | 0.00038  |
| GLYATL1  | 0.094972638  | 0.031169 | 0.049829 |

|         |              |          |          |
|---------|--------------|----------|----------|
| GLYATL2 | -0.15190505  | 0.000542 | 0.001207 |
| GLYATL3 | 0.094032853  | 0.032885 | 0.052287 |
| GLYAT   | -0.004586152 | 0.917309 | 0.935196 |
| GLYCTK  | -0.006334247 | 0.885975 | 0.910528 |
| GLYR1   | -0.237710349 | 4.77E-08 | 2.06E-07 |
| GM2A    | -0.137552845 | 0.001755 | 0.003571 |
| GMCL1L  | 0.079985477  | 0.069731 | 0.103174 |
| GMCL1   | 0.150223607  | 0.000626 | 0.001379 |
| GMDS    | 0.20893759   | 1.73E-06 | 5.84E-06 |
| GMEB1   | 0.124135169  | 0.004785 | 0.009024 |
| GMEB2   | 0.000201801  | 0.996355 | 0.997535 |
| GMFB    | 0.494124447  | 4.65E-33 | 8.86E-31 |
| GMFG    | -0.188810304 | 1.61E-05 | 4.67E-05 |
| GMIP    | -0.295047485 | 8.37E-12 | 6.35E-11 |
| GML     | -0.077657436 | 0.078288 | 0.114413 |
| GMNN    | 0.394629572  | 1.23E-20 | 3.49E-19 |
| GMPPA   | 0.152064313  | 0.000535 | 0.001193 |
| GMPPB   | 0.075603423  | 0.086529 | 0.124985 |
| GMPR2   | 0.11071849   | 0.011929 | 0.020817 |
| GMPR    | -0.33226974  | 9.70E-15 | 1.14E-13 |
| GMPS    | 0.380503424  | 3.46E-19 | 8.07E-18 |
| GNA11   | -0.102586751 | 0.019883 | 0.033154 |
| GNA12   | 0.081688912  | 0.063967 | 0.095473 |
| GNA13   | 0.142562985  | 0.001179 | 0.002475 |
| GNA14   | -0.258686872 | 2.55E-09 | 1.33E-08 |
| GNA15   | -0.082290969 | 0.062026 | 0.092909 |
| GNAI1   | -0.036238513 | 0.411843 | 0.486492 |
| GNAI2   | -0.226789404 | 1.97E-07 | 7.75E-07 |
| GNAI3   | 0.297028595  | 5.98E-12 | 4.62E-11 |
| GNAL    | -0.073088437 | 0.097555 | 0.139161 |
| GNAO1   | -0.341418613 | 1.59E-15 | 2.14E-14 |
| GNAQ    | -0.252624824 | 6.11E-09 | 3.01E-08 |
| GNASAS  | -0.012942621 | 0.769512 | 0.814672 |
| GNAS    | -0.022279273 | 0.613958 | 0.67785  |
| GNAT1   | 0.126013483  | 0.004181 | 0.007955 |
| GNAT2   | 0.045883511  | 0.298675 | 0.370066 |
| GNAT3   | -0.027402687 | 0.534947 | 0.606153 |
| GNAZ    | -0.188001627 | 1.75E-05 | 5.06E-05 |
| GNB1L   | 0.103452403  | 0.018859 | 0.031584 |
| GNB1    | 0.174095361  | 7.14E-05 | 0.000186 |
| GNB2L1  | 0.027550009  | 0.532753 | 0.60418  |
| GNB2    | 0.062810844  | 0.154636 | 0.209294 |
| GNB3    | -0.152035459 | 0.000536 | 0.001195 |
| GNB4    | 0.0846211    | 0.054967 | 0.083322 |

|           |              |          |          |
|-----------|--------------|----------|----------|
| GNB5      | -0.02840055  | 0.520176 | 0.592283 |
| GNE       | 0.030333554  | 0.492169 | 0.565437 |
| GNG10     | 0.129877779  | 0.00315  | 0.006126 |
| GNG11     | -0.015468306 | 0.726189 | 0.777803 |
| GNG12     | -0.03943189  | 0.371844 | 0.446767 |
| GNG13     | -0.025954649 | 0.556752 | 0.626174 |
| GNG2      | -0.207386016 | 2.07E-06 | 6.89E-06 |
| GNG3      | -0.060065607 | 0.173507 | 0.231744 |
| GNG4      | 0.27397606   | 2.55E-10 | 1.55E-09 |
| GNG5      | 0.128013586  | 0.003614 | 0.006948 |
| GNG7      | -0.45576775  | 8.84E-28 | 7.16E-26 |
| GNG8      | -0.053310221 | 0.227155 | 0.292606 |
| GNGT1     | 0.177745698  | 4.99E-05 | 0.000133 |
| GNGT2     | -0.142537164 | 0.001181 | 0.00248  |
| GNL1      | -0.076038545 | 0.084727 | 0.122693 |
| GNL2      | 0.095688968  | 0.029913 | 0.048059 |
| GNL3L     | 0.105632589  | 0.016482 | 0.027939 |
| GNL3      | 0.380018828  | 3.87E-19 | 8.97E-18 |
| GNLY      | 0.082165179  | 0.062428 | 0.093441 |
| GNMT      | -0.333883853 | 7.08E-15 | 8.57E-14 |
| GNPAT     | 0.1657959    | 0.000157 | 0.000387 |
| GNPDA1    | 0.070464209  | 0.110224 | 0.155043 |
| GNPDA2    | 0.042070351  | 0.340676 | 0.414805 |
| GNPNAT1   | 1            | 1.00E-54 | 1.00E-50 |
| GNPTAB    | -0.203423427 | 3.26E-06 | 1.05E-05 |
| GNPTG     | -0.239903901 | 3.55E-08 | 1.56E-07 |
| GNRH1     | -0.317212676 | 1.68E-13 | 1.64E-12 |
| GNRH2     | 0.053329845  | 0.226983 | 0.292442 |
| GNRHR2    | -0.299142    | 4.17E-12 | 3.28E-11 |
| GNRHR     | -0.179851808 | 4.04E-05 | 0.00011  |
| GNS       | 0.00999062   | 0.821063 | 0.857306 |
| GOLGA1    | -0.152646372 | 0.000509 | 0.001139 |
| GOLGA2B   | -0.404177885 | 1.17E-21 | 3.93E-20 |
| GOLGA2P3  | -0.057722785 | 0.190926 | 0.251663 |
| GOLGA2    | -0.091477788 | 0.037962 | 0.059563 |
| GOLGA3    | -0.012469233 | 0.777717 | 0.821097 |
| GOLGA4    | -0.092662193 | 0.035531 | 0.056102 |
| GOLGA5    | 0.364794624  | 1.18E-17 | 2.17E-16 |
| GOLGA6A   | -0.083922067 | 0.057011 | 0.086061 |
| GOLGA6B   | -0.119702934 | 0.006535 | 0.012008 |
| GOLGA6C   | 0.059789656  | 0.175495 | 0.234086 |
| GOLGA6D   | 0.057156678  | 0.195321 | 0.256661 |
| GOLGA6L10 | -0.328460193 | 2.02E-14 | 2.28E-13 |
| GOLGA6L1  | 0.077055768  | 0.080633 | 0.11748  |



|          |              |          |          |
|----------|--------------|----------|----------|
| GOLGA6L5 | -0.252711542 | 6.04E-09 | 2.98E-08 |
| GOLGA6L6 | 0.046661928  | 0.290543 | 0.361638 |
| GOLGA6L9 | -0.358572659 | 4.53E-17 | 7.62E-16 |
| GOLGA7B  | -0.051180305 | 0.246292 | 0.313959 |
| GOLGA7   | 0.206831136  | 2.21E-06 | 7.31E-06 |
| GOLGA8A  | -0.340411663 | 1.94E-15 | 2.58E-14 |
| GOLGA8B  | -0.30626226  | 1.21E-12 | 1.04E-11 |
| GOLGA8C  | 0.117913447  | 0.00739  | 0.013455 |
| GOLGA8DP | 0.026565613  | 0.5475   | 0.617854 |
| GOLGA8E  | 0.04126243   | 0.350038 | 0.424651 |
| GOLGA8F  | -0.000359473 | 0.993507 | 0.9952   |
| GOLGA8G  | 0.062066336  | 0.159593 | 0.21526  |
| GOLGA9P  | -0.192031298 | 1.14E-05 | 3.39E-05 |
| GOLGB1   | -0.233180151 | 8.66E-08 | 3.60E-07 |
| GOLIM4   | -0.03259597  | 0.460442 | 0.534362 |
| GOLM1    | 0.232768953  | 9.14E-08 | 3.79E-07 |
| GOLPH3L  | -0.07444807  | 0.091462 | 0.131323 |
| GOLPH3   | 0.085548048  | 0.052351 | 0.079731 |
| GOLT1A   | -0.115365812 | 0.008781 | 0.01574  |
| GOLT1B   | 0.423937729  | 7.02E-24 | 3.29E-22 |
| GON4L    | -0.142376903 | 0.001196 | 0.002509 |
| GOPC     | 0.04355088   | 0.32394  | 0.397064 |
| GORAB    | -0.092504351 | 0.035847 | 0.056568 |
| GORASP1  | -0.227464408 | 1.81E-07 | 7.15E-07 |
| GORASP2  | 0.225856857  | 2.22E-07 | 8.63E-07 |
| GOSR1    | 0.093290246  | 0.034297 | 0.054307 |
| GOSR2    | 0.135513564  | 0.002056 | 0.00414  |
| GOT1L1   | 0.102991144  | 0.019399 | 0.032409 |
| GOT1     | 0.246932558  | 1.36E-08 | 6.37E-08 |
| GOT2     | 0.29692438   | 6.09E-12 | 4.69E-11 |
| GP1BA    | -0.350855315 | 2.30E-16 | 3.47E-15 |
| GP2      | 0.062498665  | 0.1567   | 0.211815 |
| GP5      | -0.207065543 | 2.15E-06 | 7.13E-06 |
| GP6      | -0.182559433 | 3.07E-05 | 8.50E-05 |
| GP9      | -0.151238238 | 0.000574 | 0.001274 |
| GPA33    | -0.147367138 | 0.000795 | 0.001721 |
| GPAA1    | 0.027621584  | 0.531689 | 0.603178 |
| GPAM     | 0.01239191   | 0.77906  | 0.822254 |
| GPAT2    | -0.09331949  | 0.03424  | 0.054239 |
| GPATCH1  | -0.049508191 | 0.262085 | 0.331072 |
| GPATCH2  | 0.165569062  | 0.00016  | 0.000395 |
| GPATCH3  | -0.118534219 | 0.007083 | 0.012931 |
| GPATCH4  | 0.198135669  | 5.88E-06 | 1.83E-05 |
| GPATCH8  | -0.138291454 | 0.001656 | 0.003386 |

|         |              |          |          |
|---------|--------------|----------|----------|
| GPBAR1  | -0.211294543 | 1.31E-06 | 4.51E-06 |
| GPBP1L1 | -0.213137116 | 1.05E-06 | 3.68E-06 |
| GPBP1   | -0.088994132 | 0.043519 | 0.067404 |
| GPC1    | -0.067070171 | 0.128491 | 0.177625 |
| GPC2    | 0.074984047  | 0.089146 | 0.128367 |
| GPC3    | -0.299024521 | 4.25E-12 | 3.35E-11 |
| GPC4    | -0.430189701 | 1.30E-24 | 6.71E-23 |
| GPC5    | -0.194783275 | 8.50E-06 | 2.57E-05 |
| GPC6    | 0.350842119  | 2.31E-16 | 3.47E-15 |
| GPCPD1  | -0.154399295 | 0.000437 | 0.000992 |
| GPD1L   | -0.376174226 | 9.33E-19 | 2.04E-17 |
| GPD1    | -0.285151207 | 4.32E-11 | 2.93E-10 |
| GPD2    | 0.207641904  | 2.01E-06 | 6.70E-06 |
| GPER    | -0.225169181 | 2.42E-07 | 9.36E-07 |
| GPHA2   | -0.086761551 | 0.049084 | 0.075214 |
| GPHN    | 0.182387218  | 3.13E-05 | 8.63E-05 |
| GPIHBP1 | -0.328839596 | 1.88E-14 | 2.14E-13 |
| GPI     | 0.313785725  | 3.13E-13 | 2.96E-12 |
| GPKOW   | 0.034819701  | 0.430402 | 0.505101 |
| GPLD1   | -0.297816375 | 5.23E-12 | 4.07E-11 |
| GPM6A   | -0.232954173 | 8.92E-08 | 3.70E-07 |
| GPM6B   | -0.103895958 | 0.018352 | 0.03082  |
| GPN1    | 0.388165746  | 5.76E-20 | 1.49E-18 |
| GPN2    | -0.009633135 | 0.827363 | 0.862533 |
| GPN3    | 0.358387814  | 4.71E-17 | 7.90E-16 |
| GPNMB   | -0.199948123 | 4.81E-06 | 1.51E-05 |
| GPR101  | -0.064215848 | 0.1456   | 0.198665 |
| GPR107  | 0.012527869  | 0.776699 | 0.820239 |
| GPR108  | -0.284326903 | 4.94E-11 | 3.32E-10 |
| GPR109A | 0.025441907  | 0.564575 | 0.633475 |
| GPR109B | 0.052475025  | 0.234529 | 0.300999 |
| GPR110  | -0.254803806 | 4.48E-09 | 2.24E-08 |
| GPR111  | 0.093037368  | 0.034789 | 0.055022 |
| GPR112  | -0.236895823 | 5.31E-08 | 2.27E-07 |
| GPR113  | -0.212878223 | 1.09E-06 | 3.79E-06 |
| GPR114  | -0.149411673 | 0.00067  | 0.001471 |
| GPR115  | 0.273833754  | 2.61E-10 | 1.58E-09 |
| GPR116  | -0.481223781 | 3.30E-31 | 4.55E-29 |
| GPR119  | 0.108344371  | 0.013894 | 0.023936 |
| GPR120  | -0.258157432 | 2.76E-09 | 1.42E-08 |
| GPR123  | -0.218035344 | 5.85E-07 | 2.14E-06 |
| GPR124  | -0.146377859 | 0.000863 | 0.001856 |
| GPR125  | -0.006852991 | 0.876709 | 0.9037   |
| GPR126  | 0.047603343  | 0.28091  | 0.351564 |

|         |              |          |          |
|---------|--------------|----------|----------|
| GPR128  | 0.076512601  | 0.082799 | 0.120214 |
| GPR12   | -0.261017846 | 1.81E-09 | 9.66E-09 |
| GPR132  | -0.265341239 | 9.54E-10 | 5.33E-09 |
| GPR133  | -0.288862122 | 2.35E-11 | 1.66E-10 |
| GPR135  | -0.032415285 | 0.462933 | 0.53691  |
| GPR137B | -0.035773963 | 0.417867 | 0.492559 |
| GPR137C | 0.156126784  | 0.000376 | 0.000861 |
| GPR137  | -0.176957929 | 5.39E-05 | 0.000143 |
| GPR139  | -0.005852123 | 0.894601 | 0.917591 |
| GPR141  | -0.045391228 | 0.303894 | 0.375672 |
| GPR142  | -0.007930183 | 0.857522 | 0.887768 |
| GPR143  | -0.209448354 | 1.63E-06 | 5.52E-06 |
| GPR144  | 0.039404865  | 0.372172 | 0.447027 |
| GPR146  | -0.420308405 | 1.84E-23 | 8.08E-22 |
| GPR148  | -0.036778519 | 0.404906 | 0.479686 |
| GPR149  | -0.09243906  | 0.035978 | 0.05675  |
| GPR150  | -0.084862767 | 0.054275 | 0.082423 |
| GPR151  | -0.034348272 | 0.436674 | 0.511051 |
| GPR152  | 0.037682198  | 0.393454 | 0.46834  |
| GPR153  | -0.067723331 | 0.124805 | 0.173044 |
| GPR155  | -0.223440217 | 3.00E-07 | 1.15E-06 |
| GPR156  | -0.076993378 | 0.08088  | 0.117795 |
| GPR157  | 0.011016137  | 0.803054 | 0.842331 |
| GPR158  | 0.071901215  | 0.103135 | 0.146151 |
| GPR15   | 0.054511947  | 0.216836 | 0.281181 |
| GPR160  | -0.226215739 | 2.12E-07 | 8.28E-07 |
| GPR161  | -0.047740703 | 0.279522 | 0.350046 |
| GPR162  | -0.314830757 | 2.59E-13 | 2.48E-12 |
| GPR171  | -0.153396639 | 0.000477 | 0.001073 |
| GPR172A | 0.258816046  | 2.51E-09 | 1.30E-08 |
| GPR172B | -0.337043572 | 3.80E-15 | 4.82E-14 |
| GPR173  | -0.149474985 | 0.000666 | 0.001464 |
| GPR174  | -0.154529213 | 0.000432 | 0.000981 |
| GPR176  | 0.139031633  | 0.001562 | 0.003207 |
| GPR179  | -0.220301589 | 4.43E-07 | 1.65E-06 |
| GPR17   | -0.334671588 | 6.07E-15 | 7.45E-14 |
| GPR180  | 0.305548574  | 1.37E-12 | 1.17E-11 |
| GPR182  | -0.133452536 | 0.002407 | 0.004786 |
| GPR183  | -0.168369289 | 0.000124 | 0.00031  |
| GPR18   | -0.160161643 | 0.000263 | 0.000621 |
| GPR19   | 0.299843239  | 3.69E-12 | 2.94E-11 |
| GPR1    | 0.167241073  | 0.000137 | 0.000341 |
| GPR20   | -0.161991528 | 0.000223 | 0.000534 |
| GPR21   | -0.018239515 | 0.679644 | 0.736898 |

|         |              |          |          |
|---------|--------------|----------|----------|
| GPR22   | 0.062928599  | 0.153862 | 0.208403 |
| GPR25   | -0.14901765  | 0.000693 | 0.001517 |
| GPR26   | 0.001281312  | 0.976859 | 0.982957 |
| GPR27   | -0.139638765 | 0.001489 | 0.003071 |
| GPR31   | -0.131902203 | 0.002707 | 0.005335 |
| GPR32   | 0.083685692  | 0.057716 | 0.087021 |
| GPR34   | -0.144967053 | 0.000969 | 0.002066 |
| GPR35   | 0.178311989  | 4.71E-05 | 0.000126 |
| GPR37L1 | 0.218550409  | 5.49E-07 | 2.02E-06 |
| GPR37   | 0.114990892  | 0.009004 | 0.016108 |
| GPR39   | 0.002509434  | 0.954697 | 0.965175 |
| GPR3    | 0.041085006  | 0.352115 | 0.426731 |
| GPR44   | -0.35242511  | 1.66E-16 | 2.56E-15 |
| GPR45   | -0.123458406 | 0.005022 | 0.009432 |
| GPR4    | 0.068664352  | 0.119638 | 0.166783 |
| GPR50   | 0.023702821  | 0.591495 | 0.65748  |
| GPR52   | -0.021280579 | 0.629938 | 0.691906 |
| GPR55   | -0.29091395  | 1.67E-11 | 1.21E-10 |
| GPR56   | -0.052085841 | 0.238022 | 0.30472  |
| GPR61   | -0.074961965 | 0.089241 | 0.128475 |
| GPR62   | -0.12083421  | 0.006041 | 0.011168 |
| GPR63   | 0.115647424  | 0.008617 | 0.015463 |
| GPR64   | -0.229896631 | 1.33E-07 | 5.36E-07 |
| GPR65   | -0.153569855 | 0.00047  | 0.001058 |
| GPR68   | -0.141299739 | 0.001305 | 0.002718 |
| GPR6    | -0.038848228 | 0.37897  | 0.453719 |
| GPR75   | -0.193992829 | 9.25E-06 | 2.78E-05 |
| GPR77   | -0.026847093 | 0.543263 | 0.614008 |
| GPR78   | 0.181034529  | 3.59E-05 | 9.81E-05 |
| GPR81   | 0.055113342  | 0.2118   | 0.275455 |
| GPR82   | -0.160912366 | 0.000246 | 0.000584 |
| GPR83   | 0.011180967  | 0.800169 | 0.84001  |
| GPR84   | 0.005636373  | 0.898466 | 0.92062  |
| GPR85   | -0.220037823 | 4.58E-07 | 1.70E-06 |
| GPR87   | 0.070801381  | 0.108527 | 0.152946 |
| GPR88   | -0.074439707 | 0.091499 | 0.131357 |
| GPR89A  | 0.151255827  | 0.000573 | 0.001272 |
| GPR89B  | 0.049199756  | 0.265072 | 0.334339 |
| GPR89C  | 0.046712895  | 0.290016 | 0.361174 |
| GPR97   | 0.264867848  | 1.02E-09 | 5.68E-09 |
| GPR98   | -0.213983965 | 9.53E-07 | 3.36E-06 |
| GPRASP1 | -0.483345619 | 1.66E-31 | 2.38E-29 |
| GPRASP2 | -0.254824455 | 4.47E-09 | 2.24E-08 |
| GPRC5A  | -0.063016265 | 0.153289 | 0.207696 |

|         |              |          |          |
|---------|--------------|----------|----------|
| GPRC5B  | -0.080002647 | 0.069671 | 0.103093 |
| GPRC5C  | -0.271885644 | 3.53E-10 | 2.09E-09 |
| GPRC5D  | -0.076585273 | 0.082507 | 0.11986  |
| GPRC6A  | -0.030314766 | 0.492437 | 0.56568  |
| GPRIN1  | 0.144900889  | 0.000975 | 0.002076 |
| GPRIN2  | -0.304409784 | 1.67E-12 | 1.41E-11 |
| GPRIN3  | -0.015877698 | 0.719244 | 0.771755 |
| GPS1    | 0.107080577  | 0.015052 | 0.025765 |
| GPS2    | -0.046150367 | 0.29587  | 0.367183 |
| GPSM1   | -0.178833167 | 4.48E-05 | 0.00012  |
| GPSM2   | 0.161053993  | 0.000243 | 0.000577 |
| GPSM3   | -0.237089187 | 5.18E-08 | 2.22E-07 |
| GPT2    | 0.207711595  | 1.99E-06 | 6.66E-06 |
| GPT     | -0.039402982 | 0.372195 | 0.447027 |
| GPX1    | -0.016713385 | 0.70514  | 0.76013  |
| GPX2    | 0.160535258  | 0.000254 | 0.000602 |
| GPX3    | -0.1606725   | 0.000251 | 0.000596 |
| GPX4    | -0.079311419 | 0.072126 | 0.106364 |
| GPX5    | -0.035683832 | 0.419042 | 0.493711 |
| GPX6    | -0.025122401 | 0.569477 | 0.637798 |
| GPX7    | 0.000611622  | 0.988953 | 0.991831 |
| GPX8    | 0.214407816  | 9.06E-07 | 3.20E-06 |
| GRAMD1A | -0.004827948 | 0.912966 | 0.93199  |
| GRAMD1B | 0.128129632  | 0.003583 | 0.006896 |
| GRAMD1C | -0.074324922 | 0.092001 | 0.131936 |
| GRAMD2  | -0.299386907 | 3.99E-12 | 3.16E-11 |
| GRAMD3  | -0.203356845 | 3.28E-06 | 1.06E-05 |
| GRAMD4  | -0.12871201  | 0.003433 | 0.006632 |
| GRAP2   | -0.222026469 | 3.58E-07 | 1.35E-06 |
| GRAPL   | -0.161425736 | 0.000235 | 0.00056  |
| GRAP    | -0.143544997 | 0.001089 | 0.002301 |
| GRASP   | -0.353454381 | 1.34E-16 | 2.09E-15 |
| GRB10   | 0.102743181  | 0.019694 | 0.032873 |
| GRB14   | 0.046693611  | 0.290216 | 0.361332 |
| GRB2    | -0.059322464 | 0.178899 | 0.238008 |
| GRB7    | -0.162659301 | 0.00021  | 0.000506 |
| GREB1L  | 0.235206254  | 6.64E-08 | 2.81E-07 |
| GREB1   | -0.162353605 | 0.000216 | 0.000519 |
| GREM1   | 0.273740557  | 2.65E-10 | 1.60E-09 |
| GREM2   | -0.148425757 | 0.000728 | 0.001588 |
| GRHL1   | -0.186093111 | 2.14E-05 | 6.08E-05 |
| GRHL2   | -0.089220441 | 0.042985 | 0.066676 |
| GRHL3   | -0.115995892 | 0.008417 | 0.015148 |
| GRHPR   | 0.174427474  | 6.91E-05 | 0.00018  |

|         |              |          |          |
|---------|--------------|----------|----------|
| GRIA1   | -0.362912449 | 1.78E-17 | 3.18E-16 |
| GRIA2   | -0.03794645  | 0.390142 | 0.464881 |
| GRIA3   | -0.128533742 | 0.003479 | 0.006714 |
| GRIA4   | -0.109666211 | 0.012767 | 0.022149 |
| GRID1   | -0.321579444 | 7.45E-14 | 7.71E-13 |
| GRID2IP | -0.297918455 | 5.14E-12 | 4.00E-11 |
| GRID2   | 0.05942134   | 0.178174 | 0.237202 |
| GRIK1   | 0.048685064  | 0.27011  | 0.339942 |
| GRIK2   | -0.027304354 | 0.536414 | 0.607333 |
| GRIK3   | -0.217566688 | 6.19E-07 | 2.25E-06 |
| GRIK4   | -0.275780604 | 1.93E-10 | 1.19E-09 |
| GRIK5   | -0.012726095 | 0.773262 | 0.817732 |
| GRIN1   | -0.001787076 | 0.967729 | 0.97539  |
| GRIN2A  | -0.19492818  | 8.36E-06 | 2.53E-05 |
| GRIN2B  | 0.079266539  | 0.072288 | 0.106555 |
| GRIN2C  | -0.193579033 | 9.68E-06 | 2.90E-05 |
| GRIN2D  | 0.217217197  | 6.46E-07 | 2.34E-06 |
| GRIN3A  | -0.05410896  | 0.220258 | 0.284953 |
| GRIN3B  | -0.095491074 | 0.030256 | 0.048547 |
| GRINA   | 0.068222022  | 0.122046 | 0.169831 |
| GRINL1A | 0.184942621  | 2.41E-05 | 6.78E-05 |
| GRIP1   | -0.110123043 | 0.012397 | 0.021559 |
| GRIP2   | -0.072415815 | 0.100686 | 0.143137 |
| GRIPAP1 | -0.205432942 | 2.59E-06 | 8.49E-06 |
| GRK1    | -0.068997515 | 0.11785  | 0.164531 |
| GRK4    | 0.120376772  | 0.006236 | 0.011501 |
| GRK5    | -0.151363683 | 0.000568 | 0.001261 |
| GRK6    | -0.105879549 | 0.01623  | 0.027545 |
| GRK7    | 0.010190468  | 0.817546 | 0.854392 |
| GRLF1   | -0.20587369  | 2.46E-06 | 8.11E-06 |
| GRM1    | -0.04796541  | 0.277263 | 0.34774  |
| GRM2    | -0.156494511 | 0.000364 | 0.000836 |
| GRM3    | -0.251906763 | 6.77E-09 | 3.31E-08 |
| GRM4    | -0.037592936 | 0.394576 | 0.46948  |
| GRM5    | 0.036002199  | 0.414901 | 0.489612 |
| GRM6    | -0.296995953 | 6.01E-12 | 4.64E-11 |
| GRM7    | -0.184403834 | 2.54E-05 | 7.14E-05 |
| GRM8    | 0.163594352  | 0.000192 | 0.000467 |
| GRN     | -0.30905795  | 7.34E-13 | 6.57E-12 |
| GRPEL1  | 0.318200943  | 1.40E-13 | 1.39E-12 |
| GRPEL2  | 0.197263775  | 6.48E-06 | 2.00E-05 |
| GRPR    | -0.041079155 | 0.352184 | 0.426788 |
| GRP     | -0.124927065 | 0.004521 | 0.008555 |
| GRRP1   | -0.308746268 | 7.76E-13 | 6.91E-12 |

|         |              |          |          |
|---------|--------------|----------|----------|
| GRSF1   | 0.395177428  | 1.07E-20 | 3.09E-19 |
| GRTP1   | -0.023737074 | 0.590959 | 0.656994 |
| GRWD1   | 0.190291876  | 1.38E-05 | 4.04E-05 |
| GRXCR1  | -0.035657622 | 0.419384 | 0.494056 |
| GRXCR2  | -0.011055106 | 0.802372 | 0.841659 |
| GSC2    | -0.012232784 | 0.781825 | 0.824563 |
| GSC     | 0.055198822  | 0.211091 | 0.274711 |
| GSDMA   | -0.066048147 | 0.134429 | 0.185065 |
| GSDMB   | -0.257714922 | 2.94E-09 | 1.51E-08 |
| GSDMC   | 0.071460181  | 0.105271 | 0.148777 |
| GSDMD   | -0.140212228 | 0.001423 | 0.002944 |
| GSG1L   | -0.28868743  | 2.42E-11 | 1.70E-10 |
| GSG1    | 0.055269416  | 0.210507 | 0.274005 |
| GSG2    | 0.412679055  | 1.35E-22 | 5.14E-21 |
| GSK3A   | 0.184017475  | 2.65E-05 | 7.41E-05 |
| GSK3B   | 0.046786873  | 0.289252 | 0.360312 |
| GSN     | -0.392826328 | 1.89E-20 | 5.25E-19 |
| GSPT1   | 0.020137014  | 0.648449 | 0.708611 |
| GSPT2   | -0.22544042  | 2.34E-07 | 9.07E-07 |
| GSR     | 0.231029645  | 1.15E-07 | 4.67E-07 |
| GSS     | 0.182651632  | 3.04E-05 | 8.43E-05 |
| GSTA1   | -0.082109621 | 0.062606 | 0.093665 |
| GSTA2   | -0.064827488 | 0.141795 | 0.19403  |
| GSTA3   | -0.22286768  | 3.23E-07 | 1.23E-06 |
| GSTA4   | -0.13778999  | 0.001723 | 0.003512 |
| GSTA5   | -0.129755402 | 0.003178 | 0.006179 |
| GSTCD   | 0.35543833   | 8.81E-17 | 1.41E-15 |
| GSTK1   | -0.117346143 | 0.007682 | 0.013935 |
| GSTM1   | -0.054490864 | 0.217014 | 0.281338 |
| GSTM2P1 | -0.005367879 | 0.903278 | 0.92434  |
| GSTM2   | -0.293604671 | 1.07E-11 | 7.95E-11 |
| GSTM3   | -0.033640418 | 0.446189 | 0.520572 |
| GSTM4   | -0.186040054 | 2.15E-05 | 6.11E-05 |
| GSTM5   | -0.355212183 | 9.24E-17 | 1.47E-15 |
| GSTO1   | 0.213745754  | 9.80E-07 | 3.45E-06 |
| GSTO2   | 0.093411954  | 0.034062 | 0.053982 |
| GSTP1   | 0.08970383   | 0.041865 | 0.06513  |
| GSTT1   | -0.038960679 | 0.37759  | 0.452393 |
| GSTT2   | -0.09494732  | 0.031214 | 0.049897 |
| GSTTP1  | 0.033264332  | 0.451292 | 0.525636 |
| GSTTP2  | 0.037976628  | 0.389765 | 0.464507 |
| GSTZ1   | 0.063046634  | 0.15309  | 0.20747  |
| GSX2    | -0.005122251 | 0.907684 | 0.92783  |
| GTDC1   | 0.068636603  | 0.119788 | 0.166965 |

|            |              |          |          |
|------------|--------------|----------|----------|
| GTF2A1L    | 0.078525254  | 0.075004 | 0.110161 |
| GTF2A1     | 0.147223211  | 0.000805 | 0.00174  |
| GTF2A2     | 0.289403325  | 2.15E-11 | 1.53E-10 |
| GTF2B      | 0.168388075  | 0.000123 | 0.000309 |
| GTF2E1     | 0.295888899  | 7.26E-12 | 5.56E-11 |
| GTF2E2     | 0.297303604  | 5.71E-12 | 4.43E-11 |
| GTF2F1     | -0.042653798 | 0.334016 | 0.40781  |
| GTF2F2     | 0.280029187  | 9.85E-11 | 6.35E-10 |
| GTF2H1     | 0.157795874  | 0.000325 | 0.000753 |
| GTF2H2B    | 0.021138725  | 0.632222 | 0.693951 |
| GTF2H2C    | 0.035183351  | 0.4256   | 0.500229 |
| GTF2H2     | 0.113758947  | 0.009774 | 0.017394 |
| GTF2H3     | 0.312664068  | 3.84E-13 | 3.58E-12 |
| GTF2H4     | 0.113296684  | 0.010078 | 0.017881 |
| GTF2H5     | 0.146435923  | 0.000859 | 0.001848 |
| GTF2IP1    | -0.185618325 | 2.25E-05 | 6.35E-05 |
| GTF2IRD1   | 0.158150828  | 0.000315 | 0.000732 |
| GTF2IRD2B  | -0.326089899 | 3.18E-14 | 3.49E-13 |
| GTF2IRD2P1 | -0.374993043 | 1.22E-18 | 2.63E-17 |
| GTF2IRD2   | -0.353774711 | 1.25E-16 | 1.96E-15 |
| GTF2I      | -0.006948959 | 0.874996 | 0.9024   |
| GTF3A      | 0.309137913  | 7.24E-13 | 6.49E-12 |
| GTF3C1     | -0.108607625 | 0.013663 | 0.023573 |
| GTF3C2     | 0.212021773  | 1.20E-06 | 4.16E-06 |
| GTF3C3     | 0.27182986   | 3.56E-10 | 2.11E-09 |
| GTF3C4     | 0.147902724  | 0.00076  | 0.001652 |
| GTF3C5     | 0.083955558  | 0.056912 | 0.085937 |
| GTF3C6     | 0.261592326  | 1.67E-09 | 8.93E-09 |
| GTPBP10    | 0.242493469  | 2.50E-08 | 1.13E-07 |
| GTPBP1     | -0.257449388 | 3.06E-09 | 1.57E-08 |
| GTPBP2     | -0.013906495 | 0.752885 | 0.800632 |
| GTPBP3     | -0.007253947 | 0.869558 | 0.898228 |
| GTPBP4     | 0.417873978  | 3.50E-23 | 1.48E-21 |
| GTPBP5     | -0.01170041  | 0.791095 | 0.832451 |
| GTPBP8     | 0.20364539   | 3.18E-06 | 1.03E-05 |
| GTSE1      | 0.43686213   | 2.05E-25 | 1.23E-23 |
| GTSF1L     | -0.119365594 | 0.006689 | 0.012275 |
| GTSF1      | 0.054213676  | 0.219365 | 0.283905 |
| GUCA1A     | 0.336286355  | 4.41E-15 | 5.54E-14 |
| GUCA1B     | -0.015157048 | 0.731484 | 0.782578 |
| GUCA1C     | 0.072725394  | 0.099235 | 0.141315 |
| GUCA2A     | -0.077887554 | 0.077406 | 0.113265 |
| GUCA2B     | 0.134431636  | 0.002234 | 0.004466 |
| GUCY1A2    | -0.183927958 | 2.67E-05 | 7.47E-05 |



|         |              |          |          |
|---------|--------------|----------|----------|
| GUCY1A3 | -0.274240349 | 2.45E-10 | 1.49E-09 |
| GUCY1B2 | -0.047813497 | 0.278789 | 0.349325 |
| GUCY1B3 | -0.144880732 | 0.000976 | 0.002079 |
| GUCY2C  | 0.084448164  | 0.055467 | 0.083977 |
| GUCY2D  | -0.134023057 | 0.002305 | 0.004596 |
| GUCY2E  | 0.095352259  | 0.030498 | 0.048877 |
| GUCY2F  | -0.173030102 | 7.92E-05 | 0.000204 |
| GUCY2GP | 0.11587277   | 0.008487 | 0.015257 |
| GUF1    | 0.146226217  | 0.000874 | 0.001877 |
| GUK1    | -0.002797155 | 0.949509 | 0.960611 |
| GULP1   | 0.181045235  | 3.58E-05 | 9.80E-05 |
| GUSBL1  | -0.23374944  | 8.04E-08 | 3.35E-07 |
| GUSBL2  | -0.086133523 | 0.050753 | 0.077557 |
| GUSBP1  | -0.200533642 | 4.51E-06 | 1.42E-05 |
| GUSBP3  | -0.16195188  | 0.000224 | 0.000536 |
| GUSB    | -0.161263383 | 0.000238 | 0.000567 |
| GVIN1   | -0.216971137 | 6.65E-07 | 2.40E-06 |
| GXYLT1  | 0.067149571  | 0.128039 | 0.177061 |
| GXYLT2  | -0.064190118 | 0.145762 | 0.198845 |
| GYG1    | 0.196389078  | 7.13E-06 | 2.18E-05 |
| GYG2    | -0.040753898 | 0.356013 | 0.430515 |
| GYLTL1B | -0.075751106 | 0.085914 | 0.124204 |
| GYPA    | -0.041265772 | 0.349999 | 0.42463  |
| GYPB    | -0.120973798 | 0.005982 | 0.011072 |
| GYPC    | -0.250129731 | 8.70E-09 | 4.20E-08 |
| GYPE    | -0.289832635 | 2.00E-11 | 1.43E-10 |
| GYS1    | -0.097557972 | 0.026839 | 0.043562 |
| GYS2    | 0.11102353   | 0.011695 | 0.020447 |
| GZF1    | -0.043551569 | 0.323933 | 0.397064 |
| GZMA    | 0.062655055  | 0.155663 | 0.210542 |
| GZMB    | 0.222715429  | 3.29E-07 | 1.25E-06 |
| GZMH    | 0.025598259  | 0.562184 | 0.631572 |
| GZMK    | -0.124097654 | 0.004798 | 0.009046 |
| GZMM    | -0.125945818 | 0.004201 | 0.00799  |
| H19     | 0.044861876  | 0.309574 | 0.381561 |
| H1F0    | 0.176831881  | 5.46E-05 | 0.000145 |
| H1FNT   | -0.366534442 | 8.05E-18 | 1.53E-16 |
| H1FOO   | -0.00345668  | 0.937626 | 0.950802 |
| H1FX    | -0.024523937 | 0.578711 | 0.645928 |
| H2AFB1  | -0.015089448 | 0.732636 | 0.783517 |
| H2AFJ   | 0.074171388  | 0.092677 | 0.132771 |
| H2AFV   | 0.178142788  | 4.79E-05 | 0.000128 |
| H2AFX   | 0.381048322  | 3.05E-19 | 7.19E-18 |
| H2AFY2  | -0.078053792 | 0.076774 | 0.112496 |

|        |              |          |          |
|--------|--------------|----------|----------|
| H2AFY  | 0.138847438  | 0.001585 | 0.00325  |
| H2AFZ  | 0.494655628  | 3.89E-33 | 7.62E-31 |
| H2BFM  | -0.022322346 | 0.613273 | 0.677169 |
| H2BFWT | 0.029596269  | 0.502755 | 0.575515 |
| H2BFXP | -0.157142019 | 0.000344 | 0.000794 |
| H3F3A  | 0.100497519  | 0.022555 | 0.037173 |
| H3F3B  | -0.074963143 | 0.089236 | 0.128475 |
| H3F3C  | -0.07142154  | 0.10546  | 0.149012 |
| H6PD   | -0.268783492 | 5.67E-10 | 3.27E-09 |
| HAAO   | -0.359714662 | 3.54E-17 | 6.10E-16 |
| HABP2  | -0.315335956 | 2.36E-13 | 2.27E-12 |
| HABP4  | -0.175849562 | 6.01E-05 | 0.000158 |
| HACE1  | -0.127334549 | 0.003798 | 0.007277 |
| HACL1  | 0.024825659  | 0.574047 | 0.641761 |
| HADHA  | 0.168631966  | 0.00012  | 0.000303 |
| HADHB  | 0.080867646  | 0.066695 | 0.099152 |
| HADH   | -0.128865243 | 0.003395 | 0.006563 |
| HAGHL  | -0.073668621 | 0.094916 | 0.135688 |
| HAGH   | -0.265151374 | 9.82E-10 | 5.47E-09 |
| HAL    | 0.145155008  | 0.000955 | 0.002036 |
| HAMP   | 0.02380627   | 0.589877 | 0.65601  |
| HAND1  | -0.148058802 | 0.000751 | 0.001634 |
| HAND2  | -0.138240194 | 0.001663 | 0.003398 |
| HAO1   | 0.203122012  | 3.37E-06 | 1.08E-05 |
| HAO2   | -0.07170723  | 0.10407  | 0.147267 |
| HAP1   | -0.016845902 | 0.702912 | 0.758178 |
| HAPLN1 | 0.099213944  | 0.024347 | 0.039827 |
| HAPLN2 | -0.064132922 | 0.146122 | 0.199223 |
| HAPLN3 | 0.034557835  | 0.43388  | 0.508485 |
| HAPLN4 | -0.124922688 | 0.004523 | 0.008557 |
| HAR1A  | -0.13131211  | 0.00283  | 0.005551 |
| HAR1B  | 0.020755458  | 0.63841  | 0.699626 |
| HARBI1 | 0.158714699  | 0.000299 | 0.000699 |
| HARS2  | 0.014714419  | 0.739036 | 0.788758 |
| HARS   | 0.07630985   | 0.083619 | 0.121229 |
| HAS1   | -0.039226903 | 0.374337 | 0.449222 |
| HAS2AS | 0.119903219  | 0.006445 | 0.011855 |
| HAS2   | -0.023775753 | 0.590354 | 0.656431 |
| HAS3   | -0.317035475 | 1.73E-13 | 1.69E-12 |
| HAT1   | 0.266443536  | 8.08E-10 | 4.56E-09 |
| HAUS1  | 0.249264707  | 9.83E-09 | 4.72E-08 |
| HAUS2  | 0.236360176  | 5.70E-08 | 2.43E-07 |
| HAUS3  | 0.020129157  | 0.648577 | 0.708712 |
| HAUS4  | 0.031026488  | 0.482329 | 0.556114 |

|         |              |          |          |
|---------|--------------|----------|----------|
| HAUS5   | -0.162973758 | 0.000204 | 0.000492 |
| HAUS6   | 0.33292522   | 8.54E-15 | 1.02E-13 |
| HAUS7   | 0.15973795   | 0.000273 | 0.000643 |
| HAUS8   | 0.127893473  | 0.003646 | 0.007006 |
| HAVCR1  | 0.141647468  | 0.001269 | 0.00265  |
| HAVCR2  | -0.083716813 | 0.057623 | 0.0869   |
| HAX1    | 0.210265956  | 1.48E-06 | 5.04E-06 |
| HBA1    | -0.201319792 | 4.13E-06 | 1.31E-05 |
| HBA2    | -0.201081727 | 4.24E-06 | 1.35E-05 |
| HBBP1   | 0.11100715   | 0.011708 | 0.020467 |
| HBB     | -0.16020227  | 0.000262 | 0.000619 |
| HBD     | 0.072609985  | 0.099774 | 0.141982 |
| HBE1    | 0.071397186  | 0.105579 | 0.14916  |
| HBEGF   | -0.143246615 | 0.001115 | 0.002353 |
| HBG1    | -0.077102684 | 0.080449 | 0.117244 |
| HBG2    | -0.02176262  | 0.622203 | 0.685212 |
| HBM     | -0.08725152  | 0.047814 | 0.073386 |
| HBP1    | -0.079843858 | 0.070229 | 0.103811 |
| HBQ1    | 0.192216427  | 1.12E-05 | 3.33E-05 |
| HBS1L   | 0.249896955  | 8.99E-09 | 4.34E-08 |
| HBXIP   | 0.185348424  | 2.31E-05 | 6.52E-05 |
| HBZ     | -0.215161815 | 8.27E-07 | 2.94E-06 |
| HCCS    | 0.340081073  | 2.08E-15 | 2.74E-14 |
| HCFC1R1 | -0.083335219 | 0.058775 | 0.088477 |
| HCFC1   | -0.036470258 | 0.408858 | 0.483565 |
| HCFC2   | -0.06732526  | 0.127042 | 0.175852 |
| HCG11   | -0.080230962 | 0.068875 | 0.102036 |
| HCG18   | 0.075272282  | 0.08792  | 0.126802 |
| HCG22   | -0.004697298 | 0.915312 | 0.933724 |
| HCG26   | -0.324530516 | 4.28E-14 | 4.60E-13 |
| HCG27   | -0.361934328 | 2.20E-17 | 3.87E-16 |
| HCG2P7  | -0.269248274 | 5.28E-10 | 3.06E-09 |
| HCG4P6  | -0.132542328 | 0.002579 | 0.005098 |
| HCG4    | -0.097468489 | 0.02698  | 0.043762 |
| HCG9    | -0.026319807 | 0.551213 | 0.621273 |
| HCK     | -0.214609904 | 8.84E-07 | 3.13E-06 |
| HCLS1   | -0.217134586 | 6.52E-07 | 2.36E-06 |
| HCN1    | -0.167077531 | 0.000139 | 0.000346 |
| HCN2    | 0.077461832  | 0.079045 | 0.115425 |
| HCN3    | -0.098236121 | 0.025793 | 0.042004 |
| HCN4    | -0.189831227 | 1.44E-05 | 4.23E-05 |
| HCP5    | -0.082567361 | 0.061152 | 0.091757 |
| HCRTR1  | -0.23240039  | 9.59E-08 | 3.96E-07 |
| HCRTR2  | -0.155892997 | 0.000384 | 0.000878 |

|          |              |          |          |
|----------|--------------|----------|----------|
| HCRT     | -0.042292473 | 0.338131 | 0.412233 |
| HCST     | -0.162334065 | 0.000216 | 0.00052  |
| HDAC10   | -0.357215041 | 6.04E-17 | 1.00E-15 |
| HDAC11   | -0.316014877 | 2.09E-13 | 2.02E-12 |
| HDAC1    | 0.147911566  | 0.00076  | 0.001651 |
| HDAC2    | 0.344147685  | 9.15E-16 | 1.27E-14 |
| HDAC3    | -0.081620402 | 0.064191 | 0.095764 |
| HDAC4    | -0.024861859 | 0.573488 | 0.641435 |
| HDAC5    | -0.432779029 | 6.37E-25 | 3.53E-23 |
| HDAC6    | -0.276164789 | 1.81E-10 | 1.12E-09 |
| HDAC7    | -0.275865485 | 1.90E-10 | 1.17E-09 |
| HDAC8    | 0.010519835  | 0.811757 | 0.849676 |
| HDAC9    | -0.140340143 | 0.001409 | 0.002917 |
| HDC      | -0.387836845 | 6.23E-20 | 1.60E-18 |
| HDDC2    | 0.144325491  | 0.001022 | 0.002171 |
| HDDC3    | 0.141677469  | 0.001266 | 0.002644 |
| HDGFL1   | -0.043299072 | 0.326748 | 0.400015 |
| HDGFRP2  | -0.07857345  | 0.074825 | 0.109914 |
| HDGFRP3  | -0.019942571 | 0.651619 | 0.711414 |
| HDGF     | 0.375871501  | 9.99E-19 | 2.17E-17 |
| HDHD1A   | -0.034831224 | 0.430249 | 0.504981 |
| HDHD2    | -0.182866465 | 2.98E-05 | 8.26E-05 |
| HDHD3    | 0.010062551  | 0.819797 | 0.856252 |
| HDLBP    | 0.108132775  | 0.014082 | 0.024244 |
| HDX      | -0.053979359 | 0.221367 | 0.286146 |
| HEATR1   | 0.300082165  | 3.54E-12 | 2.83E-11 |
| HEATR2   | 0.33706327   | 3.79E-15 | 4.80E-14 |
| HEATR3   | 0.176533639  | 5.62E-05 | 0.000149 |
| HEATR4   | 0.064442799  | 0.144179 | 0.196955 |
| HEATR5A  | 0.208218444  | 1.88E-06 | 6.31E-06 |
| HEATR5B  | -0.229847658 | 1.33E-07 | 5.38E-07 |
| HEATR6   | -0.010874364 | 0.805538 | 0.844448 |
| HEATR7A  | -0.177028899 | 5.35E-05 | 0.000142 |
| HEATR7B2 | 0.076093876  | 0.0845   | 0.1224   |
| HEBP1    | -0.050918813 | 0.248717 | 0.316606 |
| HEBP2    | 0.240108607  | 3.46E-08 | 1.52E-07 |
| HECA     | -0.23400996  | 7.77E-08 | 3.25E-07 |
| HECTD1   | 0.051213028  | 0.245989 | 0.313654 |
| HECTD2   | 0.005333901  | 0.903887 | 0.924706 |
| HECTD3   | -0.193122294 | 1.02E-05 | 3.04E-05 |
| HECW1    | 0.042344469  | 0.337537 | 0.411533 |
| HECW2    | -0.112853426 | 0.010377 | 0.018355 |
| HEG1     | -0.126576669 | 0.004014 | 0.007661 |
| HELB     | 0.117808473  | 0.007443 | 0.013536 |

|          |              |          |          |
|----------|--------------|----------|----------|
| HELLS    | 0.374102624  | 1.49E-18 | 3.16E-17 |
| HELQ     | -0.158147628 | 0.000315 | 0.000732 |
| HELT     | -0.173235246 | 7.76E-05 | 0.000201 |
| HELZ     | -0.240171637 | 3.43E-08 | 1.51E-07 |
| HEMGN    | -0.269115254 | 5.39E-10 | 3.12E-09 |
| HEMK1    | -0.321114013 | 8.13E-14 | 8.32E-13 |
| HEPACAM2 | 0.084180382  | 0.056249 | 0.085045 |
| HEPACAM  | -0.231355662 | 1.10E-07 | 4.50E-07 |
| HEPHL1   | 0.072158568  | 0.101904 | 0.144591 |
| HEPH     | -0.039832882 | 0.366997 | 0.44166  |
| HEPN1    | -0.114529951 | 0.009286 | 0.016584 |
| HERC1    | -0.373338376 | 1.77E-18 | 3.69E-17 |
| HERC2P2  | -0.306126895 | 1.23E-12 | 1.07E-11 |
| HERC2P4  | 0.071870562  | 0.103282 | 0.146266 |
| HERC2    | -0.163274075 | 0.000198 | 0.00048  |
| HERC3    | -0.251201479 | 7.48E-09 | 3.65E-08 |
| HERC4    | 0.160128117  | 0.000264 | 0.000623 |
| HERC5    | -0.13041257  | 0.003027 | 0.005906 |
| HERC6    | -0.213060034 | 1.06E-06 | 3.72E-06 |
| HERPUD1  | -0.150252198 | 0.000624 | 0.001377 |
| HERPUD2  | 0.125559887  | 0.00432  | 0.008201 |
| HES1     | -0.016797034 | 0.703733 | 0.7589   |
| HES2     | 0.001215641  | 0.978045 | 0.983754 |
| HES3     | 0.003492826  | 0.936975 | 0.950432 |
| HES4     | 0.113865235  | 0.009705 | 0.017282 |
| HES5     | -0.056839997 | 0.197811 | 0.259532 |
| HES6     | 0.104603462  | 0.017569 | 0.029604 |
| HES7     | 0.137667952  | 0.001739 | 0.003542 |
| HESRG    | 0.103520654  | 0.01878  | 0.031473 |
| HESX1    | -0.21895054  | 5.23E-07 | 1.93E-06 |
| HEXA     | -0.066092817 | 0.134165 | 0.184766 |
| HEXB     | -0.087453518 | 0.047299 | 0.07269  |
| HEXDC    | -0.268991255 | 5.50E-10 | 3.18E-09 |
| HEXIM1   | -0.056755298 | 0.198482 | 0.260284 |
| HEXIM2   | -0.045858064 | 0.298943 | 0.37033  |
| HEY1     | 0.00097834   | 0.98233  | 0.986823 |
| HEY2     | -0.1707041   | 9.90E-05 | 0.000252 |
| HEYL     | -0.169510061 | 0.000111 | 0.00028  |
| HFE2     | -0.059763998 | 0.17568  | 0.234303 |
| HFE      | -0.036302852 | 0.411013 | 0.485683 |
| HFM1     | -0.130843368 | 0.002931 | 0.005734 |
| HGC6.3   | -0.020596559 | 0.640984 | 0.702065 |
| HGD      | 0.160197731  | 0.000262 | 0.000619 |
| HGFAC    | -0.036764502 | 0.405085 | 0.479841 |

|          |              |          |          |
|----------|--------------|----------|----------|
| HGF      | -0.154590844 | 0.00043  | 0.000977 |
| HGSNAT   | -0.063749377 | 0.148554 | 0.202087 |
| HGS      | -0.007020758 | 0.873715 | 0.901405 |
| HHATL    | -0.212568289 | 1.13E-06 | 3.92E-06 |
| HHAT     | -0.279870975 | 1.01E-10 | 6.51E-10 |
| HHEX     | -0.138959533 | 0.001571 | 0.003224 |
| HHIPL1   | -0.06810305  | 0.1227   | 0.17065  |
| HHIPL2   | 0.28435831   | 4.91E-11 | 3.30E-10 |
| HHIP     | -0.285611326 | 4.01E-11 | 2.73E-10 |
| HHLA1    | 0.057370012  | 0.193656 | 0.254741 |
| HHLA2    | -0.217409419 | 6.31E-07 | 2.29E-06 |
| HHLA3    | -0.116210899 | 0.008296 | 0.014952 |
| HIAT1    | 0.110519245  | 0.012084 | 0.021066 |
| HIATL1   | 0.07372077   | 0.094682 | 0.135392 |
| HIATL2   | -0.082650814 | 0.06089  | 0.091389 |
| HIBADH   | 0.211858035  | 1.23E-06 | 4.24E-06 |
| HIBCH    | -0.076777772 | 0.081736 | 0.118826 |
| HIC1     | -0.066597023 | 0.131214 | 0.181051 |
| HIC2     | -0.077363096 | 0.079429 | 0.115935 |
| HIF1AN   | -0.034556595 | 0.433896 | 0.508485 |
| HIF1A    | 0.295543331  | 7.69E-12 | 5.87E-11 |
| HIF3A    | -0.20136007  | 4.11E-06 | 1.31E-05 |
| HIGD1A   | 0.207632119  | 2.01E-06 | 6.71E-06 |
| HIGD1B   | -0.277203716 | 1.54E-10 | 9.64E-10 |
| HIGD1C   | -0.085503436 | 0.052475 | 0.079913 |
| HIGD2A   | -0.004985407 | 0.910139 | 0.929722 |
| HIGD2B   | -0.071721192 | 0.104002 | 0.147182 |
| HILS1    | -0.058977155 | 0.181446 | 0.240788 |
| HINFP    | 0.008661776  | 0.844537 | 0.876869 |
| HINT1    | 0.173249079  | 7.75E-05 | 0.0002   |
| HINT2    | -0.02564432  | 0.561481 | 0.630888 |
| HINT3    | -0.139232625 | 0.001538 | 0.003163 |
| HIP1R    | -0.10919123  | 0.013163 | 0.022786 |
| HIP1     | -0.329301743 | 1.72E-14 | 1.96E-13 |
| HIPK1    | -0.228783924 | 1.53E-07 | 6.10E-07 |
| HIPK2    | 0.024070721  | 0.585751 | 0.652329 |
| HIPK3    | -0.085091414 | 0.053627 | 0.0815   |
| HIPK4    | 0.060406312  | 0.171075 | 0.228833 |
| HIRA     | -0.034784026 | 0.430875 | 0.505557 |
| HIRIP3   | -0.175806262 | 6.04E-05 | 0.000159 |
| HIST1H1A | 0.055701767  | 0.206955 | 0.270014 |
| HIST1H1B | 0.259510222  | 2.26E-09 | 1.19E-08 |
| HIST1H1C | 0.091418211  | 0.038087 | 0.059723 |
| HIST1H1D | 0.153707722  | 0.000464 | 0.001047 |

|           |              |          |          |
|-----------|--------------|----------|----------|
| HIST1H1E  | 0.206288554  | 2.35E-06 | 7.76E-06 |
| HIST1H1T  | 0.040700819  | 0.35664  | 0.431169 |
| HIST1H2AA | 0.056162988  | 0.203214 | 0.265839 |
| HIST1H2AB | 0.071089138  | 0.107095 | 0.151099 |
| HIST1H2AC | 0.116356086  | 0.008215 | 0.014821 |
| HIST1H2AD | 0.09635023   | 0.028793 | 0.046397 |
| HIST1H2AE | 0.163503104  | 0.000194 | 0.000471 |
| HIST1H2AG | 0.228903966  | 1.51E-07 | 6.02E-07 |
| HIST1H2AH | 0.163215803  | 0.000199 | 0.000482 |
| HIST1H2AJ | 0.177505394  | 5.11E-05 | 0.000136 |
| HIST1H2AK | -0.020550323 | 0.641733 | 0.702547 |
| HIST1H2AL | 0.176722327  | 5.52E-05 | 0.000146 |
| HIST1H2AM | 0.210001935  | 1.53E-06 | 5.19E-06 |
| HIST1H2BA | 0.088025799  | 0.045864 | 0.070729 |
| HIST1H2BB | 0.082715331  | 0.060688 | 0.091116 |
| HIST1H2BC | 0.190239706  | 1.38E-05 | 4.06E-05 |
| HIST1H2BD | 0.200742468  | 4.40E-06 | 1.39E-05 |
| HIST1H2BE | 0.140077798  | 0.001438 | 0.002973 |
| HIST1H2BF | 0.172323517  | 8.47E-05 | 0.000218 |
| HIST1H2BG | 0.152947612  | 0.000496 | 0.001112 |
| HIST1H2BH | 0.198298583  | 5.78E-06 | 1.80E-05 |
| HIST1H2BI | 0.059519584  | 0.177456 | 0.236388 |
| HIST1H2BJ | 0.220165     | 4.51E-07 | 1.68E-06 |
| HIST1H2BK | 0.167829986  | 0.00013  | 0.000325 |
| HIST1H2BL | 0.173066525  | 7.89E-05 | 0.000204 |
| HIST1H2BM | 0.134191094  | 0.002276 | 0.004542 |
| HIST1H2BN | 0.187926821  | 1.77E-05 | 5.09E-05 |
| HIST1H2BO | 0.281092076  | 8.31E-11 | 5.42E-10 |
| HIST1H3A  | 0.055062315  | 0.212224 | 0.275952 |
| HIST1H3B  | 0.269286583  | 5.25E-10 | 3.04E-09 |
| HIST1H3C  | 0.221702993  | 3.73E-07 | 1.40E-06 |
| HIST1H3D  | 0.175719827  | 6.09E-05 | 0.00016  |
| HIST1H3E  | 0.011348226  | 0.797245 | 0.837775 |
| HIST1H3F  | 0.137358958  | 0.001782 | 0.003622 |
| HIST1H3G  | 0.169114195  | 0.000115 | 0.00029  |
| HIST1H3H  | 0.152741787  | 0.000505 | 0.00113  |
| HIST1H3I  | 0.137688453  | 0.001736 | 0.003537 |
| HIST1H3J  | 0.171141351  | 9.49E-05 | 0.000242 |
| HIST1H4A  | 0.112505291  | 0.010617 | 0.018741 |
| HIST1H4B  | 0.105502374  | 0.016616 | 0.028143 |
| HIST1H4C  | 0.122358537  | 0.005428 | 0.010132 |
| HIST1H4D  | 0.136524479  | 0.001901 | 0.003845 |
| HIST1H4E  | 0.090289721  | 0.04054  | 0.063246 |
| HIST1H4F  | 0.018551048  | 0.674483 | 0.732296 |

|            |              |          |          |
|------------|--------------|----------|----------|
| HIST1H4G   | -0.007048848 | 0.873214 | 0.901074 |
| HIST1H4H   | 0.117016892  | 0.007855 | 0.014227 |
| HIST1H4I   | 0.026084589  | 0.554778 | 0.624305 |
| HIST1H4J   | 0.069290795  | 0.116293 | 0.162664 |
| HIST1H4K   | 0.025278123  | 0.567085 | 0.635649 |
| HIST1H4L   | 0.105643214  | 0.016471 | 0.02793  |
| HIST2H2AA3 | 0.167482434  | 0.000134 | 0.000334 |
| HIST2H2AB  | 0.197695912  | 6.18E-06 | 1.91E-05 |
| HIST2H2AC  | 0.178559331  | 4.60E-05 | 0.000124 |
| HIST2H2BA  | 0.019341869  | 0.661451 | 0.720259 |
| HIST2H2BE  | 0.080890168  | 0.066619 | 0.099059 |
| HIST2H2BF  | 0.062803745  | 0.154682 | 0.209343 |
| HIST2H3C   | 0.177263457  | 5.23E-05 | 0.000139 |
| HIST2H3D   | 0.090410938  | 0.04027  | 0.06286  |
| HIST2H4A   | 0.180329292  | 3.85E-05 | 0.000105 |
| HIST3H2A   | 0.146563787  | 0.00085  | 0.00183  |
| HIST3H2BB  | 0.002085024  | 0.962352 | 0.971098 |
| HIST3H3    | -0.139874345 | 0.001462 | 0.003017 |
| HIST4H4    | -0.159393971 | 0.000282 | 0.000662 |
| HIVEP1     | -0.144002554 | 0.001049 | 0.002222 |
| HIVEP2     | -0.080277245 | 0.068714 | 0.101814 |
| HIVEP3     | -0.267554519 | 6.84E-10 | 3.90E-09 |
| HJURP      | 0.496461794  | 2.11E-33 | 4.39E-31 |
| HK1        | -0.050546759 | 0.252195 | 0.320381 |
| HK2        | 0.112386355  | 0.0107   | 0.018877 |
| HK3        | -0.158746838 | 0.000298 | 0.000697 |
| HKDC1      | -0.058941444 | 0.181711 | 0.241091 |
| HKR1       | -0.201354819 | 4.11E-06 | 1.31E-05 |
| HLA-A      | -0.117785134 | 0.007455 | 0.013554 |
| HLA-B      | -0.189681401 | 1.47E-05 | 4.29E-05 |
| HLA-C      | -0.146548455 | 0.000851 | 0.001832 |
| HLA-DMA    | -0.397056384 | 6.79E-21 | 2.03E-19 |
| HLA-DMB    | -0.297235878 | 5.77E-12 | 4.47E-11 |
| HLA-DOA    | -0.381470191 | 2.77E-19 | 6.59E-18 |
| HLA-DOB    | -0.302175478 | 2.47E-12 | 2.02E-11 |
| HLA-DPA1   | -0.341191613 | 1.66E-15 | 2.23E-14 |
| HLA-DPB1   | -0.384109672 | 1.50E-19 | 3.70E-18 |
| HLA-DPB2   | -0.25260649  | 6.13E-09 | 3.02E-08 |
| HLA-DQA1   | -0.313268612 | 3.44E-13 | 3.23E-12 |
| HLA-DQA2   | -0.218127789 | 5.78E-07 | 2.11E-06 |
| HLA-DQB1   | -0.341991793 | 1.41E-15 | 1.91E-14 |
| HLA-DQB2   | -0.401749098 | 2.14E-21 | 6.95E-20 |
| HLA-DRA    | -0.303970099 | 1.80E-12 | 1.52E-11 |
| HLA-DRB1   | -0.357938856 | 5.18E-17 | 8.67E-16 |



|          |              |          |          |
|----------|--------------|----------|----------|
| HLA-DRB5 | -0.324363842 | 4.42E-14 | 4.73E-13 |
| HLA-DRB6 | -0.178473272 | 4.64E-05 | 0.000124 |
| HLA-E    | -0.26619083  | 8.40E-10 | 4.72E-09 |
| HLA-F    | -0.238140255 | 4.50E-08 | 1.95E-07 |
| HLA-G    | -0.059761869 | 0.175696 | 0.234308 |
| HLA-H    | -0.089749668 | 0.04176  | 0.064992 |
| HLA-J    | -0.309536258 | 6.74E-13 | 6.05E-12 |
| HLA-L    | -0.295181748 | 8.18E-12 | 6.21E-11 |
| HLCS     | -0.128356518 | 0.003524 | 0.006794 |
| HLF      | -0.490880877 | 1.38E-32 | 2.42E-30 |
| HLTF     | 0.205018221  | 2.72E-06 | 8.87E-06 |
| HLX      | -0.252302204 | 6.40E-09 | 3.14E-08 |
| HM13     | 0.16846128   | 0.000122 | 0.000307 |
| HMBOX1   | 0.003717464  | 0.932931 | 0.94758  |
| HMBS     | 0.3019134    | 2.58E-12 | 2.10E-11 |
| HMCN1    | -0.33207697  | 1.01E-14 | 1.19E-13 |
| HMG20A   | -0.185709747 | 2.22E-05 | 6.30E-05 |
| HMG20B   | 0.061227521  | 0.16532  | 0.222026 |
| HMGA1    | 0.504551229  | 1.30E-34 | 3.41E-32 |
| HMGA2    | 0.107902158  | 0.01429  | 0.024568 |
| HMGB1    | 0.161682593  | 0.000229 | 0.000548 |
| HMGB2    | 0.277384111  | 1.50E-10 | 9.39E-10 |
| HMGB3L1  | 0.134630662  | 0.0022   | 0.004405 |
| HMGB3    | 0.264207392  | 1.13E-09 | 6.23E-09 |
| HMGB4    | 0.031423552  | 0.476739 | 0.550431 |
| HMGCLL1  | -0.318750821 | 1.26E-13 | 1.26E-12 |
| HMGCL    | -0.158958251 | 0.000293 | 0.000685 |
| HMGCR    | 0.126574067  | 0.004014 | 0.007662 |
| HMGCS1   | 0.056311614  | 0.202019 | 0.264506 |
| HMGCS2   | -0.100147252 | 0.023032 | 0.037899 |
| HMGN1    | 0.072146053  | 0.101964 | 0.144666 |
| HMGN2    | 0.09677218   | 0.028097 | 0.045397 |
| HMGN3    | -0.359697799 | 3.56E-17 | 6.11E-16 |
| HMGN4    | 0.189114246  | 1.56E-05 | 4.54E-05 |
| HMGN5    | -0.103664122 | 0.018616 | 0.031221 |
| HMGXB3   | -0.069372001 | 0.115865 | 0.162155 |
| HMGXB4   | 0.317666116  | 1.54E-13 | 1.52E-12 |
| HMHA1    | -0.355897987 | 7.99E-17 | 1.30E-15 |
| HMHB1    | 0.073292185  | 0.096622 | 0.137925 |
| HMMR     | 0.52311291   | 1.62E-37 | 7.54E-35 |
| HMOX1    | -0.007432165 | 0.866383 | 0.895319 |
| HMOX2    | -0.119536777 | 0.00661  | 0.012138 |
| HMP19    | 0.021012395  | 0.634259 | 0.695729 |
| HMSD     | 0.033181384  | 0.452422 | 0.526706 |

|           |              |          |          |
|-----------|--------------|----------|----------|
| HMX1      | -0.011517009 | 0.794296 | 0.83516  |
| HMX2      | 0.188569858  | 1.65E-05 | 4.78E-05 |
| HMX3      | 0.012103993  | 0.784065 | 0.826533 |
| HN1L      | 0.194490446  | 8.77E-06 | 2.65E-05 |
| HN1       | 0.365105165  | 1.10E-17 | 2.04E-16 |
| HNF1A     | 0.121917808  | 0.005599 | 0.010427 |
| HNF1B     | -0.238837163 | 4.10E-08 | 1.79E-07 |
| HNF4A     | 0.129455722  | 0.00325  | 0.006306 |
| HNF4G     | 0.130198183  | 0.003075 | 0.005995 |
| HNMT      | -0.220935032 | 4.10E-07 | 1.53E-06 |
| HNRNPA0   | 0.027305533  | 0.536397 | 0.607333 |
| HNRNPA1L2 | 0.166220759  | 0.000151 | 0.000373 |
| HNRNPA1   | 0.162681508  | 0.000209 | 0.000505 |
| HNRNPA2B1 | 0.121843933  | 0.005628 | 0.010476 |
| HNRNPA3P1 | 0.168597438  | 0.000121 | 0.000303 |
| HNRNPA3   | -0.005919128 | 0.893402 | 0.916512 |
| HNRNPAB   | 0.218237705  | 5.70E-07 | 2.09E-06 |
| HNRNPCL1  | -0.019599301 | 0.65723  | 0.716561 |
| HNRNPC    | 0.485508359  | 8.17E-32 | 1.27E-29 |
| HNRNPD    | 0.124683296  | 0.004601 | 0.008698 |
| HNRNPF    | 0.38414315   | 1.49E-19 | 3.68E-18 |
| HNRNPH1   | -0.196591001 | 6.97E-06 | 2.14E-05 |
| HNRNPH2   | 0.025119108  | 0.569527 | 0.637798 |
| HNRNPH3   | 0.022488672  | 0.610631 | 0.674884 |
| HNRNPK    | 0.31501661   | 2.50E-13 | 2.40E-12 |
| HNRNPL    | 0.310074065  | 6.12E-13 | 5.54E-12 |
| HNRNPM    | 0.062246932  | 0.158379 | 0.213825 |
| HNRNPR    | 0.300000917  | 3.59E-12 | 2.86E-11 |
| HNRNPUL1  | 0.001389302  | 0.974909 | 0.981193 |
| HNRNPUL2  | -0.079177786 | 0.072609 | 0.106941 |
| HNRNPU    | 0.100641863  | 0.022361 | 0.036892 |
| HNRPDL    | -0.114521649 | 0.009291 | 0.016591 |
| HNRPLL    | 0.233318986  | 8.50E-08 | 3.54E-07 |
| HOMER1    | 0.322823938  | 5.90E-14 | 6.17E-13 |
| HOMER2    | -0.197076366 | 6.61E-06 | 2.03E-05 |
| HOMER3    | 0.056797768  | 0.198145 | 0.259877 |
| HOMEZ     | -0.025139845 | 0.569209 | 0.637565 |
| HOOK1     | -0.013246013 | 0.764267 | 0.810278 |
| HOOK2     | -0.267922856 | 6.46E-10 | 3.70E-09 |
| HOOK3     | -0.066066016 | 0.134323 | 0.184958 |
| HOPX      | -0.249440319 | 9.59E-09 | 4.61E-08 |
| HORMAD1   | 0.11709817   | 0.007812 | 0.014154 |
| HORMAD2   | -0.008329111 | 0.850436 | 0.881895 |
| HOTAIR    | 0.081519     | 0.064524 | 0.096189 |

|          |              |          |          |
|----------|--------------|----------|----------|
| HOXA10   | 0.14410375   | 0.00104  | 0.002205 |
| HOXA11AS | 0.142693406  | 0.001166 | 0.002451 |
| HOXA11   | 0.207370642  | 2.07E-06 | 6.90E-06 |
| HOXA13   | 0.096060196  | 0.02928  | 0.04711  |
| HOXA1    | 0.15630818   | 0.00037  | 0.000849 |
| HOXA2    | -0.059300229 | 0.179062 | 0.238177 |
| HOXA3    | 0.063190875  | 0.152151 | 0.206308 |
| HOXA4    | -0.071649058 | 0.104352 | 0.147614 |
| HOXA5    | -0.190349113 | 1.37E-05 | 4.01E-05 |
| HOXA6    | -0.079746036 | 0.070574 | 0.104267 |
| HOXA7    | -0.166112883 | 0.000153 | 0.000376 |
| HOXA9    | 0.072743285  | 0.099151 | 0.141223 |
| HOXB13   | 0.098560421  | 0.025306 | 0.04127  |
| HOXB1    | -0.018264633 | 0.679227 | 0.736487 |
| HOXB2    | 0.009558934  | 0.828672 | 0.863672 |
| HOXB3    | -0.066760965 | 0.130266 | 0.179879 |
| HOXB4    | -0.088286776 | 0.045221 | 0.069836 |
| HOXB5    | 0.037766168  | 0.3924   | 0.46728  |
| HOXB6    | 0.047886498  | 0.278055 | 0.348624 |
| HOXB7    | 0.156155745  | 0.000375 | 0.000859 |
| HOXB8    | 0.107498605  | 0.01466  | 0.02515  |
| HOXB9    | 0.183531076  | 2.78E-05 | 7.75E-05 |
| HOXC10   | 0.124920263  | 0.004524 | 0.008557 |
| HOXC11   | 0.105616909  | 0.016498 | 0.027964 |
| HOXC12   | 0.099257047  | 0.024285 | 0.039742 |
| HOXC13   | 0.103010889  | 0.019375 | 0.032375 |
| HOXC4    | 0.079149586  | 0.072711 | 0.10706  |
| HOXC5    | 0.138519303  | 0.001627 | 0.003329 |
| HOXC6    | 0.18369309   | 2.74E-05 | 7.64E-05 |
| HOXC8    | 0.188880583  | 1.60E-05 | 4.64E-05 |
| HOXC9    | 0.185471555  | 2.28E-05 | 6.44E-05 |
| HOXD10   | 0.150577636  | 0.000607 | 0.001342 |
| HOXD11   | 0.175950993  | 5.95E-05 | 0.000157 |
| HOXD12   | 0.135187447  | 0.002108 | 0.004237 |
| HOXD13   | 0.146857327  | 0.000829 | 0.001789 |
| HOXD1    | -0.365496618 | 1.01E-17 | 1.89E-16 |
| HOXD3    | -0.159311161 | 0.000284 | 0.000666 |
| HOXD4    | -0.12297252  | 0.005198 | 0.009736 |
| HOXD8    | 0.115457733  | 0.008727 | 0.015649 |
| HOXD9    | 0.090498701  | 0.040076 | 0.062571 |
| HP1BP3   | -0.180136748 | 3.93E-05 | 0.000107 |
| HPCAL1   | -0.18154635  | 3.41E-05 | 9.35E-05 |
| HPCAL4   | -0.266976481 | 7.46E-10 | 4.23E-09 |
| HPCA     | -0.205485239 | 2.57E-06 | 8.45E-06 |

|          |              |          |          |
|----------|--------------|----------|----------|
| HPDL     | 0.347895657  | 4.25E-16 | 6.21E-15 |
| HPD      | 0.05709231   | 0.195825 | 0.257273 |
| HPGDS    | -0.374841134 | 1.26E-18 | 2.70E-17 |
| HPGD     | -0.218306398 | 5.66E-07 | 2.07E-06 |
| HPN      | -0.189888939 | 1.44E-05 | 4.20E-05 |
| HPRT1    | 0.353079551  | 1.45E-16 | 2.25E-15 |
| HPR      | -0.134905587 | 0.002154 | 0.004321 |
| HPS1     | -0.316698689 | 1.84E-13 | 1.80E-12 |
| HPS3     | 0.125295159  | 0.004403 | 0.008349 |
| HPS4     | -0.217111924 | 6.54E-07 | 2.37E-06 |
| HPS5     | -0.02955826  | 0.503304 | 0.575979 |
| HPS6     | 0.016433964  | 0.709845 | 0.764053 |
| HPSE2    | -0.332465622 | 9.34E-15 | 1.11E-13 |
| HPSE     | -0.055888643 | 0.205433 | 0.268291 |
| HPVC1    | 0.032753484  | 0.458277 | 0.532127 |
| HPX      | 0.016489109  | 0.708915 | 0.763253 |
| HPYR1    | -0.11164913  | 0.011229 | 0.019726 |
| HP       | -0.092621676 | 0.035612 | 0.056225 |
| HRASLS2  | -0.198312051 | 5.77E-06 | 1.79E-05 |
| HRASLS5  | -0.21319928  | 1.05E-06 | 3.66E-06 |
| HRASLS   | -0.036192883 | 0.412433 | 0.48713  |
| HRAS     | 0.045363608  | 0.304189 | 0.375943 |
| HRCT1    | -0.106354262 | 0.015755 | 0.026828 |
| HRC      | -0.154464037 | 0.000435 | 0.000987 |
| HRG      | 0.222659716  | 3.31E-07 | 1.26E-06 |
| HRH1     | 0.07775171   | 0.077926 | 0.113933 |
| HRH2     | -0.010306946 | 0.815498 | 0.852965 |
| HRH3     | 0.075031778  | 0.088942 | 0.12811  |
| HRH4     | -0.258308448 | 2.70E-09 | 1.39E-08 |
| HRK      | -0.029698847 | 0.501275 | 0.574248 |
| HRNBP3   | -0.095287746 | 0.030611 | 0.049039 |
| HRNR     | -0.115463761 | 0.008724 | 0.015644 |
| HRSP12   | 0.256861722  | 3.33E-09 | 1.70E-08 |
| HR       | -0.279479281 | 1.07E-10 | 6.88E-10 |
| HS1BP3   | 0.000873614  | 0.984221 | 0.9883   |
| HS2ST1   | 0.215386317  | 8.05E-07 | 2.87E-06 |
| HS3ST1   | -0.109143729 | 0.013203 | 0.022844 |
| HS3ST2   | -0.189276225 | 1.53E-05 | 4.47E-05 |
| HS3ST3A1 | 0.090054036  | 0.041069 | 0.064011 |
| HS3ST3B1 | -0.052115108 | 0.237758 | 0.304421 |
| HS3ST4   | -0.102367448 | 0.02015  | 0.033557 |
| HS3ST5   | -0.229373982 | 1.42E-07 | 5.70E-07 |
| HS3ST6   | -0.138973611 | 0.00157  | 0.003221 |
| HS6ST1   | -0.118010122 | 0.007342 | 0.013374 |

|           |              |          |          |
|-----------|--------------|----------|----------|
| HS6ST2    | -0.072123161 | 0.102073 | 0.144789 |
| HS6ST3    | -0.053456045 | 0.225884 | 0.291157 |
| HSBP1L1   | 0.070684438  | 0.109113 | 0.153686 |
| HSBP1     | 0.159925512  | 0.000268 | 0.000633 |
| HSCB      | 0.152864062  | 0.000499 | 0.001119 |
| HSD11B1L  | -0.174948119 | 6.57E-05 | 0.000172 |
| HSD11B1   | 0.004468014  | 0.919432 | 0.93682  |
| HSD11B2   | -0.152395409 | 0.00052  | 0.001162 |
| HSD17B10  | 0.227929859  | 1.70E-07 | 6.76E-07 |
| HSD17B11  | -0.14002787  | 0.001444 | 0.002984 |
| HSD17B12  | 0.058814918  | 0.182652 | 0.242083 |
| HSD17B13  | -0.273789652 | 2.63E-10 | 1.59E-09 |
| HSD17B14  | -0.176338009 | 5.73E-05 | 0.000151 |
| HSD17B1   | 0.071344826  | 0.105835 | 0.149459 |
| HSD17B2   | -0.138806725 | 0.00159  | 0.003259 |
| HSD17B3   | -0.258492091 | 2.63E-09 | 1.36E-08 |
| HSD17B4   | -0.296571796 | 6.46E-12 | 4.97E-11 |
| HSD17B6   | -0.374335531 | 1.42E-18 | 3.02E-17 |
| HSD17B7P2 | -0.202425275 | 3.65E-06 | 1.17E-05 |
| HSD17B7   | -0.054418312 | 0.217628 | 0.281969 |
| HSD17B8   | -0.106868759 | 0.015254 | 0.02605  |
| HSD3B1    | 0.089841917  | 0.041549 | 0.064695 |
| HSD3B2    | -0.077055737 | 0.080634 | 0.11748  |
| HSD3B7    | 0.058460621  | 0.185307 | 0.245157 |
| HSDL1     | -6.78E-06    | 0.999878 | 0.999963 |
| HSDL2     | -0.182460809 | 3.10E-05 | 8.58E-05 |
| HSF1      | 0.220974997  | 4.08E-07 | 1.53E-06 |
| HSF2BP    | 0.324154761  | 4.59E-14 | 4.89E-13 |
| HSF2      | -0.006205697 | 0.888274 | 0.912459 |
| HSF4      | -0.247569129 | 1.24E-08 | 5.86E-08 |
| HSF5      | -0.202874175 | 3.47E-06 | 1.11E-05 |
| HSFX2     | -0.388062918 | 5.91E-20 | 1.53E-18 |
| HSFY2     | -0.033492067 | 0.448198 | 0.522428 |
| HSFYL1    | 0.025496799  | 0.563735 | 0.632827 |
| HSH2D     | -0.150359547 | 0.000618 | 0.001365 |
| HSN2      | 0.096371518  | 0.028757 | 0.046344 |
| HSP90AA1  | 0.367878825  | 5.99E-18 | 1.16E-16 |
| HSP90AB1  | 0.240950546  | 3.09E-08 | 1.37E-07 |
| HSP90AB2P | 0.192177337  | 1.13E-05 | 3.34E-05 |
| HSP90AB4P | 0.0298457    | 0.49916  | 0.572219 |
| HSP90B1   | 0.308330974  | 8.36E-13 | 7.41E-12 |
| HSP90B3P  | 0.18575044   | 2.21E-05 | 6.28E-05 |
| HSPA12A   | -0.113709412 | 0.009806 | 0.017446 |
| HSPA12B   | -0.262070175 | 1.55E-09 | 8.37E-09 |

|         |              |          |          |
|---------|--------------|----------|----------|
| HSPA13  | 0.337610065  | 3.40E-15 | 4.34E-14 |
| HSPA14  | 0.334740591  | 5.98E-15 | 7.37E-14 |
| HSPA1A  | 0.132867546  | 0.002517 | 0.004983 |
| HSPA1B  | 0.17767681   | 5.02E-05 | 0.000134 |
| HSPA1L  | -0.136958781 | 0.001838 | 0.003728 |
| HSPA2   | 0.053661807  | 0.2241   | 0.289231 |
| HSPA4L  | 0.20911509   | 1.69E-06 | 5.73E-06 |
| HSPA4   | 0.308212228  | 8.53E-13 | 7.55E-12 |
| HSPA5   | 0.219939969  | 4.63E-07 | 1.72E-06 |
| HSPA6   | -0.049482561 | 0.262332 | 0.331301 |
| HSPA7   | -0.227648812 | 1.77E-07 | 6.99E-07 |
| HSPA8   | 0.27402582   | 2.53E-10 | 1.54E-09 |
| HSPA9   | 0.311597487  | 4.66E-13 | 4.28E-12 |
| HSPB11  | -0.03284277  | 0.457052 | 0.531106 |
| HSPB1   | -0.033589785 | 0.446875 | 0.521158 |
| HSPB2   | -0.160251511 | 0.000261 | 0.000616 |
| HSPB3   | -0.229485145 | 1.40E-07 | 5.62E-07 |
| HSPB6   | -0.266743897 | 7.73E-10 | 4.37E-09 |
| HSPB7   | -0.326979329 | 2.69E-14 | 2.98E-13 |
| HSPB8   | -0.274189129 | 2.47E-10 | 1.50E-09 |
| HSPB9   | -0.140230766 | 0.001421 | 0.00294  |
| HSPBAP1 | -0.12176229  | 0.005661 | 0.010529 |
| HSPBP1  | 0.086783923  | 0.049025 | 0.075142 |
| HSPC072 | 0.072653624  | 0.09957  | 0.141742 |
| HSPC157 | -0.147888332 | 0.000761 | 0.001654 |
| HSPC159 | -0.221215485 | 3.96E-07 | 1.48E-06 |
| HSPD1   | 0.519779065  | 5.56E-37 | 2.26E-34 |
| HSPE1   | 0.421004316  | 1.53E-23 | 6.81E-22 |
| HSPG2   | -0.294169341 | 9.70E-12 | 7.29E-11 |
| HSPH1   | 0.173508289  | 7.56E-05 | 0.000196 |
| HTATIP2 | 0.317310119  | 1.65E-13 | 1.61E-12 |
| HTATSF1 | -0.088236604 | 0.045344 | 0.069994 |
| HTA     | 0.028391166  | 0.520314 | 0.592392 |
| HTN1    | -0.035117012 | 0.426474 | 0.501138 |
| HTR1A   | -0.03091857  | 0.483855 | 0.557551 |
| HTR1B   | 0.098233343  | 0.025798 | 0.042007 |
| HTR1D   | 0.222108897  | 3.54E-07 | 1.34E-06 |
| HTR1E   | -0.075707504 | 0.086095 | 0.124437 |
| HTR1F   | -0.011630541 | 0.792314 | 0.833515 |
| HTR2A   | -0.071635481 | 0.104418 | 0.147665 |
| HTR2B   | -0.085426179 | 0.052689 | 0.080197 |
| HTR2C   | 0.16922925   | 0.000114 | 0.000287 |
| HTR3A   | 0.03152273   | 0.475349 | 0.549079 |
| HTR3B   | 0.107554165  | 0.014608 | 0.025068 |

|        |              |          |          |
|--------|--------------|----------|----------|
| HTR3C  | -0.22766307  | 1.76E-07 | 6.98E-07 |
| HTR3D  | 0.020584046  | 0.641186 | 0.702168 |
| HTR3E  | -0.009202616 | 0.834965 | 0.868793 |
| HTR4   | -0.261946712 | 1.58E-09 | 8.51E-09 |
| HTR5A  | -0.068779685 | 0.119017 | 0.165992 |
| HTR6   | -0.089008915 | 0.043484 | 0.067366 |
| HTR7P1 | -0.159634743 | 0.000276 | 0.000649 |
| HTR7   | -0.093761982 | 0.033394 | 0.053    |
| HTRA1  | -0.052497164 | 0.234331 | 0.300765 |
| HTRA2  | 0.164277966  | 0.000181 | 0.000441 |
| HTRA3  | 0.08911853   | 0.043225 | 0.066996 |
| HTRA4  | -0.199397376 | 5.12E-06 | 1.60E-05 |
| HTT    | -0.190753946 | 1.31E-05 | 3.86E-05 |
| HULC   | -0.057043729 | 0.196206 | 0.257689 |
| HUNK   | -0.246873177 | 1.37E-08 | 6.42E-08 |
| HUS1B  | 0.099563949  | 0.023847 | 0.039081 |
| HUS1   | 0.141303526  | 0.001304 | 0.002717 |
| HUWE1  | 0.03799122   | 0.389583 | 0.464396 |
| HVCN1  | -0.247917033 | 1.19E-08 | 5.61E-08 |
| HYAL1  | -0.019403589 | 0.660438 | 0.71947  |
| HYAL2  | 0.006764124  | 0.878295 | 0.90489  |
| HYAL3  | 0.045858875  | 0.298934 | 0.37033  |
| HYAL4  | 0.031697367  | 0.472905 | 0.546668 |
| HYALP1 | 0.03716908   | 0.399932 | 0.47456  |
| HYDIN  | -0.201448976 | 4.07E-06 | 1.29E-05 |
| HYI    | -0.30649828  | 1.16E-12 | 1.00E-11 |
| HYLS1  | 0.386521033  | 8.50E-20 | 2.14E-18 |
| HYMAI  | -0.137483501 | 0.001764 | 0.003588 |
| HYOU1  | 0.164770201  | 0.000173 | 0.000423 |
| IAH1   | 0.181190412  | 3.53E-05 | 9.68E-05 |
| IAPP   | 0.120133276  | 0.006343 | 0.011682 |
| IARS2  | 0.283644434  | 5.51E-11 | 3.68E-10 |
| IARS   | 0.402306581  | 1.86E-21 | 6.13E-20 |
| IBSP   | 0.180854234  | 3.65E-05 | 9.98E-05 |
| IBTK   | 0.158244861  | 0.000312 | 0.000726 |
| ICA1L  | -0.271605253 | 3.68E-10 | 2.18E-09 |
| ICA1   | 0.033356427  | 0.45004  | 0.524391 |
| ICAM1  | -0.283675311 | 5.48E-11 | 3.66E-10 |
| ICAM2  | -0.145652284 | 0.000916 | 0.00196  |
| ICAM3  | -0.160756052 | 0.000249 | 0.000591 |
| ICAM4  | -0.363657845 | 1.51E-17 | 2.74E-16 |
| ICAM5  | -0.4480585   | 8.50E-27 | 6.04E-25 |
| ICK    | -0.00505662  | 0.908861 | 0.928654 |
| ICMT   | 0.118792825  | 0.006958 | 0.01272  |

|         |              |          |          |
|---------|--------------|----------|----------|
| ICOSLG  | -0.223085293 | 3.14E-07 | 1.20E-06 |
| ICOS    | -0.115534269 | 0.008682 | 0.015576 |
| ICT1    | 0.255027187  | 4.34E-09 | 2.18E-08 |
| ID1     | 0.06031354   | 0.171735 | 0.229608 |
| ID2B    | -0.014160757 | 0.748518 | 0.796963 |
| ID2     | -0.091126845 | 0.038708 | 0.060616 |
| ID3     | 0.03377038   | 0.444434 | 0.518705 |
| ID4     | -0.197012621 | 6.66E-06 | 2.05E-05 |
| IDE     | 0.171072803  | 9.55E-05 | 0.000244 |
| IDH1    | 0.192679371  | 1.07E-05 | 3.18E-05 |
| IDH2    | 0.112679011  | 0.010496 | 0.018547 |
| IDH3A   | 0.129423604  | 0.003257 | 0.006318 |
| IDH3B   | 0.047450788  | 0.282456 | 0.353167 |
| IDH3G   | 0.03908491   | 0.37607  | 0.450815 |
| IDI1    | 0.157326412  | 0.000338 | 0.000782 |
| IDI2    | 0.099748297  | 0.023587 | 0.038704 |
| IDO1    | -0.015879037 | 0.719221 | 0.771755 |
| IDO2    | -0.309015753 | 7.40E-13 | 6.61E-12 |
| IDS     | -0.132643279 | 0.00256  | 0.005062 |
| IDUA    | -0.339371462 | 2.39E-15 | 3.14E-14 |
| IER2    | -0.192816806 | 1.05E-05 | 3.14E-05 |
| IER3IP1 | 0.169716005  | 0.000109 | 0.000275 |
| IER3    | 0.11235357   | 0.010723 | 0.018912 |
| IER5L   | 0.136093579  | 0.001966 | 0.00397  |
| IER5    | 0.119345635  | 0.006698 | 0.012289 |
| IFFO1   | -0.255984324 | 3.78E-09 | 1.91E-08 |
| IFFO2   | -0.24891058  | 1.03E-08 | 4.93E-08 |
| IFI16   | -0.073702102 | 0.094766 | 0.135492 |
| IFI27L1 | 0.054584606  | 0.216223 | 0.280568 |
| IFI27L2 | -0.13932147  | 0.001527 | 0.003143 |
| IFI27   | -0.04616202  | 0.295748 | 0.367063 |
| IFI30   | -0.069463283 | 0.115385 | 0.161585 |
| IFI35   | -0.006776282 | 0.878078 | 0.904738 |
| IFI44L  | -0.096244412 | 0.02897  | 0.04666  |
| IFI44   | -0.126612706 | 0.004003 | 0.007643 |
| IFI6    | -0.096583307 | 0.028407 | 0.045853 |
| IFIH1   | -0.069933078 | 0.112939 | 0.15855  |
| IFIT1B  | -0.023112467 | 0.600765 | 0.666032 |
| IFIT1   | -0.147694655 | 0.000774 | 0.001679 |
| IFIT2   | -0.147141486 | 0.00081  | 0.001752 |
| IFIT3   | -0.057856447 | 0.189898 | 0.250474 |
| IFIT5   | -0.155142136 | 0.00041  | 0.000933 |
| IFITM1  | -0.035572901 | 0.42049  | 0.495126 |
| IFITM2  | -0.080761354 | 0.067055 | 0.09962  |



|         |              |          |          |
|---------|--------------|----------|----------|
| IFITM3  | 0.005641933  | 0.898366 | 0.920591 |
| IFITM4P | 0.012571159  | 0.775948 | 0.819663 |
| IFITM5  | -0.009276208 | 0.833665 | 0.867789 |
| IFLTD1  | -0.201014196 | 4.27E-06 | 1.36E-05 |
| IFNA10  | 0.003347794  | 0.939587 | 0.952395 |
| IFNA13  | 0.072996459  | 0.097978 | 0.139705 |
| IFNA14  | -0.030767205 | 0.485998 | 0.559445 |
| IFNA16  | 0.016979139  | 0.700675 | 0.756174 |
| IFNA1   | 0.101422466  | 0.021336 | 0.035362 |
| IFNA21  | -0.084764505 | 0.054556 | 0.082788 |
| IFNA2   | 0.102248181  | 0.020296 | 0.033767 |
| IFNA4   | 0.069152934  | 0.117023 | 0.16357  |
| IFNA5   | -0.044426528 | 0.314298 | 0.386548 |
| IFNA7   | -0.087922812 | 0.046119 | 0.07109  |
| IFNA8   | 0.043018481  | 0.329896 | 0.4033   |
| IFNAR1  | -0.215370298 | 8.07E-07 | 2.87E-06 |
| IFNAR2  | -0.182885936 | 2.97E-05 | 8.24E-05 |
| IFNB1   | -0.028399653 | 0.520189 | 0.592283 |
| IFNE    | 0.097929313  | 0.026262 | 0.042698 |
| IFNGR1  | -0.113360272 | 0.010035 | 0.017814 |
| IFNGR2  | -0.041527779 | 0.346945 | 0.421334 |
| IFNG    | 0.133428197  | 0.002412 | 0.004794 |
| IFNK    | -0.088267062 | 0.04527  | 0.069894 |
| IFNW1   | -0.083786918 | 0.057413 | 0.086603 |
| IFRD1   | 0.229159015  | 1.46E-07 | 5.84E-07 |
| IFRD2   | 0.123020613  | 0.00518  | 0.009705 |
| IFT122  | -0.236371141 | 5.69E-08 | 2.43E-07 |
| IFT140  | -0.426355428 | 3.67E-24 | 1.82E-22 |
| IFT172  | -0.431139943 | 1.00E-24 | 5.32E-23 |
| IFT20   | 0.085451053  | 0.05262  | 0.080104 |
| IFT27   | -0.150924843 | 0.000589 | 0.001305 |
| IFT46   | -0.116358136 | 0.008214 | 0.014821 |
| IFT52   | 0.072080866  | 0.102274 | 0.145034 |
| IFT57   | -0.333747086 | 7.27E-15 | 8.79E-14 |
| IFT74   | -0.105635661 | 0.016478 | 0.027936 |
| IFT80   | -0.30760958  | 9.50E-13 | 8.35E-12 |
| IFT81   | 0.104082396  | 0.018143 | 0.030502 |
| IFT88   | -0.108572144 | 0.013694 | 0.023624 |
| IGBP1   | 0.089497488  | 0.04234  | 0.065752 |
| IGDCC3  | 0.017103845  | 0.698584 | 0.75421  |
| IGDCC4  | 0.00642297   | 0.884389 | 0.909413 |
| IGF1R   | -0.032837544 | 0.457123 | 0.531127 |
| IGF1    | -0.055640935 | 0.207452 | 0.27061  |
| IGF2AS  | -0.029249439 | 0.507776 | 0.580316 |

|         |              |          |          |
|---------|--------------|----------|----------|
| IGF2BP1 | 0.280839003  | 8.65E-11 | 5.63E-10 |
| IGF2BP2 | 0.139630574  | 0.00149  | 0.003072 |
| IGF2BP3 | 0.319002646  | 1.20E-13 | 1.21E-12 |
| IGF2R   | -0.096710571 | 0.028198 | 0.045541 |
| IGF2    | -0.144206072 | 0.001032 | 0.002189 |
| IGFALS  | -0.306153014 | 1.23E-12 | 1.06E-11 |
| IGFBP1  | 0.260770209  | 1.88E-09 | 9.98E-09 |
| IGFBP2  | -0.098674987 | 0.025135 | 0.04101  |
| IGFBP3  | 0.16069713   | 0.00025  | 0.000594 |
| IGFBP4  | -0.207359419 | 2.07E-06 | 6.91E-06 |
| IGFBP5  | 0.039091418  | 0.37599  | 0.450774 |
| IGFBP6  | -0.11391257  | 0.009675 | 0.017234 |
| IGFBP7  | -0.161057256 | 0.000242 | 0.000577 |
| IGFBPL1 | 0.006835395  | 0.877023 | 0.903931 |
| IGFL1   | -0.010839554 | 0.806148 | 0.844999 |
| IGFL2   | -0.005640507 | 0.898392 | 0.920591 |
| IGFL3   | -0.067032089 | 0.128709 | 0.177889 |
| IGFL4   | 0.04818994   | 0.275017 | 0.345335 |
| IGFN1   | -0.307758337 | 9.25E-13 | 8.15E-12 |
| IGHMBP2 | -0.072619149 | 0.099731 | 0.141941 |
| IGJ     | -0.091871172 | 0.037139 | 0.058378 |
| IGLL1   | -0.068436454 | 0.120874 | 0.168341 |
| IGLL3   | -0.208544172 | 1.81E-06 | 6.10E-06 |
| IGLON5  | 0.173053573  | 7.90E-05 | 0.000204 |
| IGSF10  | -0.377942815 | 6.23E-19 | 1.39E-17 |
| IGSF11  | 0.051639669  | 0.242072 | 0.30931  |
| IGSF1   | 0.051064699  | 0.247362 | 0.315142 |
| IGSF21  | -0.123928664 | 0.004856 | 0.009149 |
| IGSF22  | -0.144413037 | 0.001014 | 0.002156 |
| IGSF3   | -0.276086419 | 1.84E-10 | 1.14E-09 |
| IGSF5   | -0.036339872 | 0.410536 | 0.485195 |
| IGSF6   | -0.18419187  | 2.60E-05 | 7.29E-05 |
| IGSF8   | -0.097073847 | 0.027608 | 0.044676 |
| IGSF9B  | -0.358423441 | 4.67E-17 | 7.85E-16 |
| IGSF9   | -0.003091642 | 0.944201 | 0.955725 |
| IHH     | -0.200227317 | 4.67E-06 | 1.47E-05 |
| IKBIP   | 0.293303767  | 1.12E-11 | 8.33E-11 |
| IKBKAP  | -0.069998165 | 0.112604 | 0.158101 |
| IKBKB   | -0.314333063 | 2.84E-13 | 2.69E-12 |
| IKBKE   | -0.141679095 | 0.001266 | 0.002644 |
| IKBKG   | -0.085367745 | 0.052852 | 0.080396 |
| IKZF1   | -0.265619702 | 9.15E-10 | 5.12E-09 |
| IKZF2   | -0.27233244  | 3.29E-10 | 1.96E-09 |
| IKZF3   | -0.172208363 | 8.57E-05 | 0.00022  |

|         |              |          |          |
|---------|--------------|----------|----------|
| IKZF4   | -0.219534932 | 4.87E-07 | 1.80E-06 |
| IKZF5   | -0.093158543 | 0.034552 | 0.054686 |
| IK      | -0.197242973 | 6.49E-06 | 2.00E-05 |
| IL10RA  | -0.234449159 | 7.33E-08 | 3.08E-07 |
| IL10RB  | -0.057387582 | 0.193519 | 0.254628 |
| IL10    | -0.06165876  | 0.162357 | 0.218472 |
| IL11RA  | -0.484229602 | 1.24E-31 | 1.85E-29 |
| IL11    | 0.203010812  | 3.41E-06 | 1.10E-05 |
| IL12A   | -0.044040976 | 0.31852  | 0.391163 |
| IL12B   | -0.333587866 | 7.50E-15 | 9.03E-14 |
| IL12RB1 | -0.132074943 | 0.002672 | 0.005269 |
| IL12RB2 | 0.187778825  | 1.79E-05 | 5.17E-05 |
| IL13RA1 | 0.002060444  | 0.962796 | 0.971398 |
| IL13RA2 | -0.155741541 | 0.000389 | 0.000889 |
| IL13    | -0.069604266 | 0.114647 | 0.160676 |
| IL15RA  | 0.058744713  | 0.183176 | 0.242696 |
| IL15    | 0.04329293   | 0.326817 | 0.400075 |
| IL16    | -0.328180562 | 2.14E-14 | 2.40E-13 |
| IL17A   | 0.010175919  | 0.817802 | 0.85457  |
| IL17B   | 0.034652303  | 0.432623 | 0.507261 |
| IL17C   | 0.203316681  | 3.30E-06 | 1.06E-05 |
| IL17D   | -0.054750506 | 0.214828 | 0.278975 |
| IL17F   | -0.125866668 | 0.004226 | 0.008032 |
| IL17RA  | -0.216756334 | 6.83E-07 | 2.46E-06 |
| IL17RB  | -0.050522862 | 0.25242  | 0.320606 |
| IL17RC  | -0.227491474 | 1.80E-07 | 7.13E-07 |
| IL17RD  | 0.056259297  | 0.202439 | 0.265004 |
| IL17REL | -0.161757486 | 0.000228 | 0.000545 |
| IL17RE  | -0.182437539 | 3.11E-05 | 8.60E-05 |
| IL18BP  | -0.100991609 | 0.021897 | 0.036198 |
| IL18R1  | -0.046640534 | 0.290765 | 0.361881 |
| IL18RAP | -0.064180421 | 0.145823 | 0.198909 |
| IL18    | -0.071046935 | 0.107304 | 0.151351 |
| IL19    | -0.007675311 | 0.862054 | 0.89151  |
| IL1A    | 0.085623654  | 0.052142 | 0.079438 |
| IL1B    | -0.015037063 | 0.733529 | 0.784162 |
| IL1F10  | 0.004612182  | 0.916841 | 0.934885 |
| IL1F5   | 0.112715614  | 0.010471 | 0.018509 |
| IL1F6   | -0.100241647 | 0.022903 | 0.037709 |
| IL1F7   | -0.278851426 | 1.19E-10 | 7.56E-10 |
| IL1F8   | 0.103687473  | 0.018589 | 0.031184 |
| IL1F9   | -0.083249277 | 0.059037 | 0.088825 |
| IL1R1   | -0.212956894 | 1.08E-06 | 3.75E-06 |
| IL1R2   | 0.346195755  | 6.03E-16 | 8.61E-15 |

|          |              |          |          |
|----------|--------------|----------|----------|
| IL1RAPL1 | 0.019768223  | 0.654466 | 0.714093 |
| IL1RAPL2 | 0.008696923  | 0.843915 | 0.87645  |
| IL1RAP   | -0.024257787 | 0.582841 | 0.649775 |
| IL1RL1   | -0.041257417 | 0.350096 | 0.424696 |
| IL1RL2   | 0.002241755  | 0.959525 | 0.968929 |
| IL1RN    | 0.004097451  | 0.926094 | 0.942266 |
| IL20RA   | 0.002271681  | 0.958985 | 0.968531 |
| IL20RB   | 0.187525363  | 1.84E-05 | 5.29E-05 |
| IL20     | -0.13388378  | 0.00233  | 0.004641 |
| IL21R    | -0.109924395 | 0.012557 | 0.021812 |
| IL21     | 0.084142459  | 0.05636  | 0.085194 |
| IL22RA1  | 0.019319177  | 0.661823 | 0.720586 |
| IL22RA2  | -0.130530317 | 0.003    | 0.005858 |
| IL22     | -0.094508805 | 0.032006 | 0.05102  |
| IL23A    | 0.069536632  | 0.115    | 0.161126 |
| IL23R    | -0.112191016 | 0.010838 | 0.019103 |
| IL24     | -0.076583703 | 0.082513 | 0.11986  |
| IL25     | -0.113429791 | 0.009989 | 0.01774  |
| IL26     | -0.051272426 | 0.245441 | 0.313075 |
| IL27RA   | -0.17115244  | 9.48E-05 | 0.000242 |
| IL27     | 0.075454105  | 0.087154 | 0.125852 |
| IL28A    | -0.005813693 | 0.895289 | 0.918103 |
| IL28B    | 0.046258437  | 0.294739 | 0.366098 |
| IL28RA   | -0.345678655 | 6.70E-16 | 9.48E-15 |
| IL29     | 0.004267206  | 0.923041 | 0.939827 |
| IL2RA    | 0.064981076  | 0.140851 | 0.192857 |
| IL2RB    | 0.002000603  | 0.963876 | 0.972144 |
| IL2RG    | -0.154200485 | 0.000445 | 0.001007 |
| IL2      | -0.218773616 | 5.34E-07 | 1.96E-06 |
| IL31RA   | 0.132843335  | 0.002521 | 0.004992 |
| IL31     | 0.031697756  | 0.4729   | 0.546668 |
| IL32     | 0.042931197  | 0.330879 | 0.404428 |
| IL33     | -0.308118825 | 8.68E-13 | 7.66E-12 |
| IL34     | -0.395484954 | 9.95E-21 | 2.89E-19 |
| IL3RA    | -0.268877816 | 5.59E-10 | 3.23E-09 |
| IL3      | -0.024826837 | 0.574029 | 0.641761 |
| IL411    | -0.024453892 | 0.579797 | 0.646884 |
| IL4R     | -0.1376988   | 0.001735 | 0.003534 |
| IL4      | -0.079243266 | 0.072372 | 0.106647 |
| IL5RA    | -0.224321481 | 2.69E-07 | 1.03E-06 |
| IL5      | -0.029310463 | 0.506891 | 0.579544 |
| IL6R     | -0.289440461 | 2.14E-11 | 1.52E-10 |
| IL6ST    | -0.134970129 | 0.002144 | 0.004302 |
| IL6      | 0.167986796  | 0.000128 | 0.00032  |

|        |              |          |          |
|--------|--------------|----------|----------|
| IL7R   | -0.176210333 | 5.80E-05 | 0.000153 |
| IL7    | -0.103299763 | 0.019036 | 0.031867 |
| IL8    | 0.326628658  | 2.87E-14 | 3.17E-13 |
| IL9R   | -0.155122188 | 0.000411 | 0.000935 |
| IL9    | 0.092055971  | 0.036758 | 0.057834 |
| ILDR1  | -0.328451447 | 2.03E-14 | 2.28E-13 |
| ILDR2  | -0.231905237 | 1.02E-07 | 4.20E-07 |
| ILF2   | 0.397728217  | 5.76E-21 | 1.74E-19 |
| ILF3   | -0.0285443   | 0.518065 | 0.590269 |
| ILKAP  | 0.035457035  | 0.422006 | 0.49657  |
| ILK    | -0.052566373 | 0.233714 | 0.300069 |
| ILVBL  | 0.050682467  | 0.250923 | 0.319028 |
| IMMP1L | 0.102467101  | 0.020028 | 0.033368 |
| IMMP2L | 0.094707069  | 0.031646 | 0.050526 |
| IMMT   | 0.325022926  | 3.90E-14 | 4.22E-13 |
| IMP3   | 0.051475146  | 0.243577 | 0.310975 |
| IMP4   | 0.22776785   | 1.74E-07 | 6.89E-07 |
| IMP5   | -0.013447836 | 0.760783 | 0.807313 |
| IMPA1  | 0.310357304  | 5.82E-13 | 5.29E-12 |
| IMPA2  | 0.097146864  | 0.027491 | 0.044501 |
| IMPACT | 0.030754078  | 0.486185 | 0.559623 |
| IMPAD1 | 0.268120412  | 6.27E-10 | 3.60E-09 |
| IMPDH1 | 0.049207941  | 0.264993 | 0.334281 |
| IMPDH2 | 0.227316707  | 1.84E-07 | 7.27E-07 |
| IMPG1  | -0.303624571 | 1.92E-12 | 1.60E-11 |
| IMPG2  | -0.109930942 | 0.012552 | 0.021805 |
| INADL  | -0.152723253 | 0.000505 | 0.001132 |
| INA    | 0.085735462  | 0.051835 | 0.079036 |
| INCA1  | -0.310264057 | 5.92E-13 | 5.37E-12 |
| INCENP | 0.314591843  | 2.71E-13 | 2.58E-12 |
| INE1   | -0.274582999 | 2.32E-10 | 1.42E-09 |
| INE2   | -0.230116911 | 1.29E-07 | 5.22E-07 |
| INF2   | 0.026403986  | 0.54994  | 0.620176 |
| ING1   | 0.034224538  | 0.438329 | 0.512538 |
| ING2   | 0.084707802  | 0.054718 | 0.082995 |
| ING3   | -0.053554273 | 0.225031 | 0.290273 |
| ING4   | -0.135378749 | 0.002077 | 0.00418  |
| ING5   | -0.24573577  | 1.61E-08 | 7.44E-08 |
| INGX   | 0.107779335  | 0.014401 | 0.024738 |
| INHA   | 0.20225635   | 3.72E-06 | 1.19E-05 |
| INHBA  | 0.189458106  | 1.50E-05 | 4.38E-05 |
| INHBB  | -0.121235886 | 0.005873 | 0.010887 |
| INHBC  | 0.065532011  | 0.137506 | 0.188834 |
| INHBE  | 0.277333785  | 1.51E-10 | 9.46E-10 |

|          |              |          |          |
|----------|--------------|----------|----------|
| INMT     | -0.417778957 | 3.58E-23 | 1.51E-21 |
| INO80B   | -0.029282315 | 0.507299 | 0.57992  |
| INO80C   | 0.072469891  | 0.100431 | 0.142856 |
| INO80D   | -0.210476468 | 1.44E-06 | 4.93E-06 |
| INO80E   | -0.083537144 | 0.058163 | 0.087595 |
| INO80    | -0.211919857 | 1.22E-06 | 4.21E-06 |
| INPP1    | -0.152207954 | 0.000528 | 0.00118  |
| INPP4A   | -0.280806959 | 8.70E-11 | 5.66E-10 |
| INPP4B   | 0.182914855  | 2.96E-05 | 8.22E-05 |
| INPP5A   | -0.191366456 | 1.23E-05 | 3.63E-05 |
| INPP5B   | -0.451209691 | 3.39E-27 | 2.57E-25 |
| INPP5D   | -0.280246879 | 9.51E-11 | 6.15E-10 |
| INPP5E   | -0.228207427 | 1.65E-07 | 6.54E-07 |
| INPP5F   | -0.029601502 | 0.50268  | 0.575515 |
| INPP5J   | -0.379908938 | 3.97E-19 | 9.19E-18 |
| INPP5K   | -0.340710676 | 1.83E-15 | 2.44E-14 |
| INPPL1   | -0.137004539 | 0.001831 | 0.003716 |
| INS-IGF2 | -0.079646555 | 0.070927 | 0.10475  |
| INSC     | 0.017191433  | 0.697116 | 0.752861 |
| INSIG1   | -0.031290171 | 0.478613 | 0.552467 |
| INSIG2   | -0.085500952 | 0.052482 | 0.079918 |
| INSL3    | -0.005664784 | 0.897957 | 0.92024  |
| INSL4    | 0.288489853  | 2.50E-11 | 1.76E-10 |
| INSL5    | -0.126678711 | 0.003984 | 0.007612 |
| INSL6    | 0.018664454  | 0.672608 | 0.730419 |
| INSM1    | -0.020063646 | 0.649645 | 0.709585 |
| INSM2    | -0.128502473 | 0.003487 | 0.006727 |
| INSRR    | -0.034023087 | 0.441031 | 0.515335 |
| INSR     | -0.09591325  | 0.029529 | 0.047488 |
| INS      | -0.005307909 | 0.904353 | 0.925047 |
| INTS10   | 0.049781618  | 0.259456 | 0.32829  |
| INTS12   | 0.074845147  | 0.089742 | 0.129103 |
| INTS1    | -0.006162003 | 0.889055 | 0.913084 |
| INTS2    | 0.18017946   | 3.91E-05 | 0.000106 |
| INTS3    | -0.198244541 | 5.81E-06 | 1.81E-05 |
| INTS4L1  | -0.01755022  | 0.691116 | 0.747391 |
| INTS4L2  | 0.00440845   | 0.920502 | 0.937715 |
| INTS4    | 0.106230505  | 0.015877 | 0.027004 |
| INTS5    | -0.058026046 | 0.188601 | 0.249043 |
| INTS6    | 0.2540385    | 5.00E-09 | 2.49E-08 |
| INTS7    | 0.365511491  | 1.01E-17 | 1.89E-16 |
| INTS8    | 0.417398689  | 3.96E-23 | 1.66E-21 |
| INTS9    | -0.137927067 | 0.001704 | 0.003478 |
| INTU     | -0.155060526 | 0.000413 | 0.00094  |

|          |              |          |          |
|----------|--------------|----------|----------|
| INVS     | 0.080009698  | 0.069646 | 0.103071 |
| IP6K1    | -0.149589771 | 0.00066  | 0.001451 |
| IP6K2    | -0.139037234 | 0.001562 | 0.003207 |
| IP6K3    | -0.050345529 | 0.254091 | 0.322605 |
| IPCEF1   | -0.287127632 | 3.13E-11 | 2.17E-10 |
| IPMK     | 0.211338865  | 1.30E-06 | 4.49E-06 |
| IPO11    | 0.186793216  | 1.99E-05 | 5.68E-05 |
| IPO13    | -0.185446546 | 2.29E-05 | 6.46E-05 |
| IPO4     | 0.337363577  | 3.57E-15 | 4.54E-14 |
| IPO5     | 0.340230695  | 2.02E-15 | 2.67E-14 |
| IPO7     | 0.286688503  | 3.36E-11 | 2.32E-10 |
| IPO8     | 0.226524496  | 2.04E-07 | 8.00E-07 |
| IPO9     | 0.133567774  | 0.002386 | 0.004747 |
| IPPK     | 0.17367636   | 7.44E-05 | 0.000193 |
| IPP      | -0.013883375 | 0.753283 | 0.800969 |
| IPW      | -0.170844279 | 9.77E-05 | 0.000249 |
| IQCA1    | -0.257524458 | 3.02E-09 | 1.55E-08 |
| IQCB1    | -0.094138567 | 0.032688 | 0.052015 |
| IQCC     | -0.15049409  | 0.000611 | 0.00135  |
| IQCD     | -0.011531283 | 0.794047 | 0.834942 |
| IQCE     | -0.102570101 | 0.019903 | 0.033176 |
| IQCF1    | -0.113561094 | 0.009903 | 0.017607 |
| IQCF2    | -0.040750264 | 0.356056 | 0.430541 |
| IQCF3    | -0.044325948 | 0.315395 | 0.387755 |
| IQCF5    | 0.119154762  | 0.006787 | 0.012438 |
| IQCF6    | -0.00966848  | 0.82674  | 0.862063 |
| IQCG     | -0.213354172 | 1.03E-06 | 3.60E-06 |
| IQCH     | -0.067834956 | 0.124183 | 0.172288 |
| IQCJ     | 0.111166309  | 0.011587 | 0.020288 |
| IQCK     | -0.193144418 | 1.01E-05 | 3.03E-05 |
| IQGAP1   | -0.153545764 | 0.000471 | 0.00106  |
| IQGAP2   | -0.288969917 | 2.31E-11 | 1.63E-10 |
| IQGAP3   | 0.319523736  | 1.09E-13 | 1.10E-12 |
| IQSEC1   | -0.355613464 | 8.49E-17 | 1.37E-15 |
| IQSEC2   | -0.273544076 | 2.73E-10 | 1.64E-09 |
| IQSEC3   | -0.187643193 | 1.82E-05 | 5.24E-05 |
| IQUB     | -0.15851064  | 0.000305 | 0.000711 |
| IRAK1BP1 | -0.098604381 | 0.02524  | 0.041177 |
| IRAK1    | 0.278694094  | 1.22E-10 | 7.74E-10 |
| IRAK2    | 0.075666735  | 0.086265 | 0.124639 |
| IRAK3    | -0.164414503 | 0.000179 | 0.000436 |
| IRAK4    | -0.029116684 | 0.509705 | 0.582171 |
| IREB2    | 0.062241635  | 0.158415 | 0.213859 |
| IRF1     | 0.047593026  | 0.281014 | 0.35165  |

|         |              |          |          |
|---------|--------------|----------|----------|
| IRF2BP1 | -0.021846857 | 0.620855 | 0.684029 |
| IRF2BP2 | -0.165740833 | 0.000158 | 0.000389 |
| IRF2    | -0.229927095 | 1.32E-07 | 5.34E-07 |
| IRF3    | -0.22064211  | 4.25E-07 | 1.59E-06 |
| IRF4    | -0.12799363  | 0.003619 | 0.006958 |
| IRF5    | -0.192278818 | 1.11E-05 | 3.31E-05 |
| IRF6    | -0.060520557 | 0.170266 | 0.227903 |
| IRF7    | -0.101144026 | 0.021697 | 0.035897 |
| IRF8    | -0.249109659 | 1.00E-08 | 4.81E-08 |
| IRF9    | -0.101128691 | 0.021717 | 0.035924 |
| IRGC    | 0.006480375  | 0.883363 | 0.908592 |
| IRGM    | -0.107483729 | 0.014673 | 0.025171 |
| IRGQ    | -0.097940056 | 0.026246 | 0.042674 |
| IRS1    | 0.009265462  | 0.833855 | 0.867897 |
| IRS2    | 0.079487781  | 0.071493 | 0.105523 |
| IRS4    | -0.064091285 | 0.146384 | 0.199491 |
| IRX1    | -0.343130841 | 1.12E-15 | 1.54E-14 |
| IRX2    | -0.387646465 | 6.52E-20 | 1.67E-18 |
| IRX3    | -0.281781493 | 7.44E-11 | 4.88E-10 |
| IRX4    | 0.069299023  | 0.116249 | 0.162614 |
| IRX5    | -0.309572675 | 6.70E-13 | 6.02E-12 |
| IRX6    | -0.330254289 | 1.43E-14 | 1.65E-13 |
| ISCA1P1 | 0.278180123  | 1.32E-10 | 8.35E-10 |
| ISCA1   | 0.182705816  | 3.03E-05 | 8.39E-05 |
| ISCA2   | 0.163717452  | 0.00019  | 0.000462 |
| ISCU    | -0.287981105 | 2.72E-11 | 1.90E-10 |
| ISG15   | 0.087450569  | 0.047306 | 0.072696 |
| ISG20L2 | 0.283714918  | 5.45E-11 | 3.64E-10 |
| ISG20   | 0.100993353  | 0.021894 | 0.036197 |
| ISL1    | -0.063859063 | 0.147855 | 0.201248 |
| ISL2    | 0.162201907  | 0.000219 | 0.000525 |
| ISLR2   | -0.337203309 | 3.68E-15 | 4.68E-14 |
| ISLR    | -0.086763721 | 0.049078 | 0.075211 |
| ISM1    | -0.221781798 | 3.69E-07 | 1.39E-06 |
| ISM2    | 0.17133245   | 9.32E-05 | 0.000238 |
| ISOC1   | 0.014576426  | 0.741396 | 0.790727 |
| ISOC2   | 0.045797786  | 0.299579 | 0.371026 |
| ISPD    | 0.024668013  | 0.576482 | 0.644051 |
| ISX     | 0.04578726   | 0.29969  | 0.371118 |
| ISY1    | 0.157738828  | 0.000326 | 0.000757 |
| ISYNA1  | -0.120582774 | 0.006147 | 0.011351 |
| ITCH    | 0.220134734  | 4.52E-07 | 1.68E-06 |
| ITFG1   | -0.010380724 | 0.814201 | 0.851877 |
| ITFG2   | -0.183519564 | 2.79E-05 | 7.76E-05 |



|          |              |          |          |
|----------|--------------|----------|----------|
| ITFG3    | -0.155153529 | 0.00041  | 0.000933 |
| ITGA10   | -0.308862452 | 7.60E-13 | 6.78E-12 |
| ITGA11   | 0.104628115  | 0.017542 | 0.029562 |
| ITGA1    | -0.031202077 | 0.479853 | 0.553738 |
| ITGA2B   | -0.243866214 | 2.08E-08 | 9.47E-08 |
| ITGA2    | -0.026286303 | 0.55172  | 0.621666 |
| ITGA3    | -0.128983166 | 0.003365 | 0.006513 |
| ITGA4    | -0.213483036 | 1.01E-06 | 3.55E-06 |
| ITGA5    | 0.225657663  | 2.27E-07 | 8.84E-07 |
| ITGA6    | 0.059984825  | 0.174087 | 0.232424 |
| ITGA7    | -0.301897871 | 2.59E-12 | 2.11E-11 |
| ITGA8    | -0.332866539 | 8.63E-15 | 1.03E-13 |
| ITGA9    | -0.369024734 | 4.65E-18 | 9.14E-17 |
| ITGAD    | -0.209042668 | 1.71E-06 | 5.77E-06 |
| ITGAE    | 0.153877447  | 0.000458 | 0.001033 |
| ITGAL    | -0.27940875  | 1.09E-10 | 6.94E-10 |
| ITGAM    | -0.264627083 | 1.06E-09 | 5.88E-09 |
| ITGAV    | 0.116123225  | 0.008345 | 0.015035 |
| ITGAX    | -0.286533839 | 3.45E-11 | 2.38E-10 |
| ITGB1BP1 | 0.221197609  | 3.97E-07 | 1.49E-06 |
| ITGB1BP2 | -0.155111763 | 0.000411 | 0.000936 |
| ITGB1BP3 | -0.07531568  | 0.087737 | 0.126602 |
| ITGB1    | 0.377400146  | 7.05E-19 | 1.57E-17 |
| ITGB2    | -0.25931025  | 2.33E-09 | 1.22E-08 |
| ITGB3BP  | 0.187478427  | 1.85E-05 | 5.32E-05 |
| ITGB3    | -0.097294509 | 0.027255 | 0.044141 |
| ITGB4    | -0.097789807 | 0.026478 | 0.043017 |
| ITGB5    | 0.036177433  | 0.412632 | 0.487337 |
| ITGB6    | -0.185306749 | 2.32E-05 | 6.54E-05 |
| ITGB7    | -0.107123024 | 0.015011 | 0.025709 |
| ITGB8    | -0.145816551 | 0.000904 | 0.001936 |
| ITGBL1   | -0.182236406 | 3.18E-05 | 8.75E-05 |
| ITIH1    | -0.07639284  | 0.083283 | 0.120837 |
| ITIH2    | 0.006732677  | 0.878856 | 0.905219 |
| ITIH3    | -0.225109414 | 2.44E-07 | 9.43E-07 |
| ITIH4    | -0.184336501 | 2.56E-05 | 7.19E-05 |
| ITIH5L   | 0.090375859  | 0.040348 | 0.062965 |
| ITIH5    | -0.396595308 | 7.60E-21 | 2.26E-19 |
| ITK      | -0.196120833 | 7.34E-06 | 2.24E-05 |
| ITLN1    | -0.196892404 | 6.75E-06 | 2.07E-05 |
| ITLN2    | -0.1906335   | 1.33E-05 | 3.90E-05 |
| ITM2A    | -0.217363419 | 6.34E-07 | 2.30E-06 |
| ITM2B    | -0.182394191 | 3.13E-05 | 8.63E-05 |
| ITM2C    | -0.055902194 | 0.205323 | 0.268165 |

|               |              |          |          |
|---------------|--------------|----------|----------|
| ITPA          | 0.116171456  | 0.008318 | 0.014989 |
| ITPK1         | 0.01183887   | 0.788681 | 0.830436 |
| ITPKA         | 0.120661703  | 0.006114 | 0.011294 |
| ITPKB         | -0.263653066 | 1.23E-09 | 6.71E-09 |
| ITPKC         | -0.031791017 | 0.471598 | 0.545345 |
| ITPR1         | -0.148171601 | 0.000744 | 0.00162  |
| ITPR2         | -0.255975174 | 3.78E-09 | 1.92E-08 |
| ITPR3         | -0.2658484   | 8.84E-10 | 4.95E-09 |
| ITPRIPL1      | -0.055274285 | 0.210467 | 0.27397  |
| ITPRIPL2      | 0.062695203  | 0.155398 | 0.21024  |
| ITPRIP        | -0.160815039 | 0.000248 | 0.000589 |
| ITSN1         | -0.033604822 | 0.446671 | 0.521035 |
| ITSN2         | -0.298635258 | 4.54E-12 | 3.56E-11 |
| IVD           | -0.33825436  | 2.99E-15 | 3.86E-14 |
| IVL           | -0.204835098 | 2.77E-06 | 9.05E-06 |
| IVNS1ABP      | -0.014722701 | 0.738895 | 0.788758 |
| IWS1          | 0.121106003  | 0.005927 | 0.010977 |
| IYD           | -0.15457107  | 0.000431 | 0.000978 |
| IZUMO1        | -0.168149255 | 0.000126 | 0.000316 |
| JAG1          | 0.005825404  | 0.89508  | 0.917998 |
| JAG2          | 0.035066734  | 0.427136 | 0.501758 |
| JAGN1         | 0.222045853  | 3.57E-07 | 1.35E-06 |
| JAK1          | -0.181851896 | 3.30E-05 | 9.08E-05 |
| JAK2          | -0.120635633 | 0.006125 | 0.011311 |
| JAK3          | -0.147605834 | 0.000779 | 0.00169  |
| JAKMIP1       | -0.009091541 | 0.836929 | 0.870508 |
| JAKMIP2       | -0.061082073 | 0.166329 | 0.223186 |
| JAKMIP3       | -0.031064304 | 0.481795 | 0.555627 |
| JAM2          | -0.324348708 | 4.43E-14 | 4.74E-13 |
| JAM3          | -0.141074559 | 0.001328 | 0.002763 |
| JARID2        | 0.068292878  | 0.121658 | 0.169326 |
| JAZF1         | -0.206039023 | 2.42E-06 | 7.96E-06 |
| JDP2          | -0.205702025 | 2.51E-06 | 8.26E-06 |
| JHDM1D        | -0.193829834 | 9.42E-06 | 2.83E-05 |
| JKAMP         | 0.222267671  | 3.47E-07 | 1.31E-06 |
| JMJD1C        | -0.054690487 | 0.215332 | 0.279502 |
| JMJD4         | 0.15879789   | 0.000297 | 0.000694 |
| JMJD5         | -0.261964838 | 1.58E-09 | 8.49E-09 |
| JMJD6         | 0.180002265  | 3.98E-05 | 0.000108 |
| JMJD7-PLA2G4B | -0.499615384 | 7.18E-34 | 1.63E-31 |
| JMJD8         | -0.241705955 | 2.79E-08 | 1.25E-07 |
| JMY           | -0.248027234 | 1.17E-08 | 5.52E-08 |
| JOSD1         | 0.058267492  | 0.186765 | 0.246929 |
| JOSD2         | -0.091953762 | 0.036968 | 0.058133 |

|         |              |          |          |
|---------|--------------|----------|----------|
| JPH1    | -0.18685296  | 1.97E-05 | 5.65E-05 |
| JPH2    | -0.161263295 | 0.000238 | 0.000567 |
| JPH3    | -0.036670126 | 0.406293 | 0.481099 |
| JPH4    | -0.413190341 | 1.18E-22 | 4.60E-21 |
| JRKL    | -0.014392321 | 0.744548 | 0.793522 |
| JRK     | -0.036858196 | 0.403888 | 0.478594 |
| JSRP1   | -0.005542471 | 0.900148 | 0.921966 |
| JTB     | 0.134614794  | 0.002203 | 0.00441  |
| JUB     | 0.018637414  | 0.673055 | 0.730864 |
| JUNB    | -0.174313499 | 6.99E-05 | 0.000182 |
| JUND    | -0.252279058 | 6.42E-09 | 3.15E-08 |
| JUN     | -0.296194289 | 6.89E-12 | 5.29E-11 |
| JUP     | 0.022063257  | 0.6174   | 0.680897 |
| KAAG1   | 0.089531043  | 0.042263 | 0.065662 |
| KAL1    | -0.346550973 | 5.60E-16 | 8.05E-15 |
| KALRN   | -0.186451781 | 2.06E-05 | 5.87E-05 |
| KANK1   | -0.249044176 | 1.01E-08 | 4.85E-08 |
| KANK2   | -0.389170836 | 4.54E-20 | 1.19E-18 |
| KANK3   | -0.400876905 | 2.65E-21 | 8.47E-20 |
| KANK4   | -0.08966295  | 0.041959 | 0.065256 |
| KARS    | 0.279433171  | 1.08E-10 | 6.92E-10 |
| KAT2A   | -0.020448017 | 0.643393 | 0.703971 |
| KAT2B   | -0.379327818 | 4.54E-19 | 1.04E-17 |
| KAT5    | -0.084527542 | 0.055237 | 0.083693 |
| KATNA1  | 0.105268684  | 0.016859 | 0.028517 |
| KATNAL1 | -0.032728821 | 0.458615 | 0.532458 |
| KATNAL2 | -0.248950159 | 1.03E-08 | 4.91E-08 |
| KATNB1  | -0.128407801 | 0.003511 | 0.006771 |
| KAZALD1 | 0.185042744  | 2.38E-05 | 6.71E-05 |
| KAZ     | -0.35496705  | 9.73E-17 | 1.55E-15 |
| KBTBD10 | -0.217305622 | 6.39E-07 | 2.32E-06 |
| KBTBD11 | -0.099880367 | 0.023402 | 0.038435 |
| KBTBD12 | -0.03877987  | 0.37981  | 0.454507 |
| KBTBD13 | -0.183787819 | 2.71E-05 | 7.57E-05 |
| KBTBD2  | 0.118919883  | 0.006897 | 0.012625 |
| KBTBD3  | -0.147673533 | 0.000775 | 0.001682 |
| KBTBD4  | -0.14143473  | 0.001291 | 0.002692 |
| KBTBD5  | -0.072533089 | 0.100134 | 0.142454 |
| KBTBD6  | 0.090557384  | 0.039946 | 0.062389 |
| KBTBD7  | -0.055940329 | 0.205014 | 0.267814 |
| KBTBD8  | -0.13240445  | 0.002606 | 0.005145 |
| KC6     | 0.082937679  | 0.059996 | 0.090131 |
| KCMF1   | 0.428665297  | 1.96E-24 | 1.00E-22 |
| KCNA10  | -0.199828395 | 4.88E-06 | 1.53E-05 |

|        |              |          |          |
|--------|--------------|----------|----------|
| KCNA1  | -0.123827303 | 0.004891 | 0.009205 |
| KCNA2  | -0.212152329 | 1.18E-06 | 4.10E-06 |
| KCNA3  | -0.301499473 | 2.77E-12 | 2.25E-11 |
| KCNA4  | -0.31646268  | 1.92E-13 | 1.87E-12 |
| KCNA5  | -0.344543875 | 8.44E-16 | 1.18E-14 |
| KCNA6  | -0.234087248 | 7.69E-08 | 3.22E-07 |
| KCNA7  | 0.00038237   | 0.993093 | 0.994906 |
| KCNAB1 | -0.218786507 | 5.33E-07 | 1.96E-06 |
| KCNAB2 | -0.318098947 | 1.42E-13 | 1.41E-12 |
| KCNAB3 | -0.28726871  | 3.06E-11 | 2.12E-10 |
| KCNB1  | -0.128493045 | 0.003489 | 0.00673  |
| KCNB2  | -0.110437471 | 0.012148 | 0.021166 |
| KCNC1  | -0.101021725 | 0.021857 | 0.036141 |
| KCNC2  | 0.165146757  | 0.000167 | 0.000409 |
| KCNC3  | -0.359782891 | 3.49E-17 | 6.02E-16 |
| KCNC4  | -0.267388798 | 7.01E-10 | 3.99E-09 |
| KCND1  | -0.187823776 | 1.78E-05 | 5.15E-05 |
| KCND2  | 0.336147786  | 4.54E-15 | 5.67E-14 |
| KCND3  | -0.277139758 | 1.56E-10 | 9.72E-10 |
| KCNE1L | -0.117136279 | 0.007792 | 0.014122 |
| KCNE1  | -0.24753531  | 1.25E-08 | 5.89E-08 |
| KCNE2  | -0.109853252 | 0.012615 | 0.021905 |
| KCNE3  | 0.131886034  | 0.00271  | 0.00534  |
| KCNE4  | 0.056811259  | 0.198039 | 0.259788 |
| KCNF1  | 0.293863385  | 1.02E-11 | 7.63E-11 |
| KCNG1  | 0.058249056  | 0.186905 | 0.247081 |
| KCNG2  | 0.027337728  | 0.535916 | 0.606941 |
| KCNG3  | -0.022721315 | 0.606943 | 0.671532 |
| KCNG4  | -0.00211342  | 0.96184  | 0.970826 |
| KCNH1  | -0.20295273  | 3.43E-06 | 1.10E-05 |
| KCNH2  | -0.115902544 | 0.00847  | 0.01523  |
| KCNH3  | -0.112803098 | 0.010411 | 0.018409 |
| KCNH4  | -0.164101048 | 0.000184 | 0.000448 |
| KCNH5  | 0.111197874  | 0.011564 | 0.02025  |
| KCNH6  | 0.034014538  | 0.441146 | 0.515439 |
| KCNH7  | 0.040754228  | 0.356009 | 0.430515 |
| KCNH8  | -0.092236101 | 0.03639  | 0.057328 |
| KCNIP1 | -0.145488859 | 0.000929 | 0.001985 |
| KCNIP2 | -0.307305291 | 1.00E-12 | 8.78E-12 |
| KCNIP3 | -0.195588424 | 7.78E-06 | 2.37E-05 |
| KCNIP4 | -0.016883927 | 0.702273 | 0.757653 |
| KCNJ10 | -0.018218463 | 0.679993 | 0.737197 |
| KCNJ11 | -0.216674201 | 6.90E-07 | 2.48E-06 |
| KCNJ12 | -0.02777785  | 0.529369 | 0.601233 |

|          |              |          |          |
|----------|--------------|----------|----------|
| KCNJ13   | -0.174294841 | 7.00E-05 | 0.000182 |
| KCNJ14   | 0.058014259  | 0.188691 | 0.249145 |
| KCNJ15   | -0.322255411 | 6.57E-14 | 6.84E-13 |
| KCNJ16   | -0.091119656 | 0.038724 | 0.06063  |
| KCNJ1    | -0.101276102 | 0.021525 | 0.035648 |
| KCNJ2    | -0.15910257  | 0.000289 | 0.000678 |
| KCNJ3    | 0.007395363  | 0.867038 | 0.895857 |
| KCNJ4    | 0.055667043  | 0.207239 | 0.270349 |
| KCNJ5    | -0.32118142  | 8.03E-14 | 8.23E-13 |
| KCNJ6    | 0.026703319  | 0.545425 | 0.616042 |
| KCNJ8    | 0.054884133  | 0.213709 | 0.277685 |
| KCNJ9    | -0.045164581 | 0.306318 | 0.378083 |
| KCNK10   | 0.023422548  | 0.595888 | 0.661884 |
| KCNK12   | 0.106992836  | 0.015135 | 0.025882 |
| KCNK13   | -0.123379474 | 0.00505  | 0.009481 |
| KCNK15   | -0.099040714 | 0.024598 | 0.040211 |
| KCNK16   | -0.074981333 | 0.089158 | 0.128374 |
| KCNK17   | -0.279562299 | 1.06E-10 | 6.80E-10 |
| KCNK18   | 0.041626615  | 0.345798 | 0.420043 |
| KCNK1    | -0.009220628 | 0.834647 | 0.868646 |
| KCNK2    | 0.040820012  | 0.355232 | 0.429727 |
| KCNK3    | -0.189520708 | 1.49E-05 | 4.36E-05 |
| KCNK4    | -0.245112521 | 1.75E-08 | 8.07E-08 |
| KCNK5    | -0.342712247 | 1.22E-15 | 1.67E-14 |
| KCNK6    | -0.004543981 | 0.918067 | 0.935763 |
| KCNK7    | -0.034328581 | 0.436937 | 0.511329 |
| KCNK9    | 0.134443547  | 0.002232 | 0.004464 |
| KCNMA1   | -0.118536232 | 0.007082 | 0.01293  |
| KCNMB1   | -0.210164075 | 1.50E-06 | 5.10E-06 |
| KCNMB2   | -0.154042494 | 0.000451 | 0.00102  |
| KCNMB3   | -0.069089393 | 0.11736  | 0.163939 |
| KCNMB4   | 0.297088429  | 5.92E-12 | 4.58E-11 |
| KCNN1    | -0.063043538 | 0.15311  | 0.20747  |
| KCNN2    | -0.108466524 | 0.013786 | 0.023778 |
| KCNN3    | -0.053111994 | 0.22889  | 0.29467  |
| KCNN4    | -0.064150214 | 0.146013 | 0.199107 |
| KCNQ1DN  | -0.041179389 | 0.351009 | 0.425597 |
| KCNQ1OT1 | -0.194491763 | 8.77E-06 | 2.65E-05 |
| KCNQ1    | -0.337376227 | 3.56E-15 | 4.53E-14 |
| KCNQ2    | 0.062162267  | 0.158947 | 0.214476 |
| KCNQ3    | -0.117358545 | 0.007675 | 0.013926 |
| KCNQ4    | -0.059587983 | 0.176958 | 0.235834 |
| KCNQ5    | -0.087786844 | 0.046458 | 0.071569 |
| KCNRG    | -0.232450835 | 9.52E-08 | 3.94E-07 |

|        |              |          |          |
|--------|--------------|----------|----------|
| KCNS1  | -0.168448529 | 0.000123 | 0.000308 |
| KCNS2  | -0.195106658 | 8.20E-06 | 2.49E-05 |
| KCNS3  | -0.155036677 | 0.000414 | 0.000941 |
| KCNT1  | -0.062148606 | 0.159039 | 0.214586 |
| KCNT2  | -0.126309621 | 0.004092 | 0.0078   |
| KCNU1  | 0.243105194  | 2.30E-08 | 1.04E-07 |
| KCNV1  | 0.155375921  | 0.000402 | 0.000915 |
| KCNV2  | -0.007234753 | 0.8699   | 0.898442 |
| KCP    | 0.08781688   | 0.046383 | 0.071464 |
| KCTD10 | -0.143467802 | 0.001095 | 0.002315 |
| KCTD11 | -0.060145582 | 0.172934 | 0.231071 |
| KCTD12 | -0.233772576 | 8.01E-08 | 3.35E-07 |
| KCTD13 | -0.082315996 | 0.061947 | 0.092797 |
| KCTD14 | -0.146046983 | 0.000887 | 0.001903 |
| KCTD15 | -0.036579878 | 0.40745  | 0.482214 |
| KCTD16 | -0.099486847 | 0.023956 | 0.039239 |
| KCTD17 | -0.075846587 | 0.085518 | 0.123734 |
| KCTD18 | -0.178721939 | 4.53E-05 | 0.000122 |
| KCTD19 | -0.295060298 | 8.35E-12 | 6.33E-11 |
| KCTD1  | -0.101242912 | 0.021568 | 0.035711 |
| KCTD20 | 0.166715119  | 0.000144 | 0.000358 |
| KCTD21 | 0.058574252  | 0.184452 | 0.244226 |
| KCTD2  | -0.276028575 | 1.85E-10 | 1.15E-09 |
| KCTD3  | 0.260691659  | 1.90E-09 | 1.01E-08 |
| KCTD4  | 0.000277416  | 0.994989 | 0.996535 |
| KCTD5  | 0.164242791  | 0.000181 | 0.000442 |
| KCTD6  | 0.186066361  | 2.14E-05 | 6.09E-05 |
| KCTD7  | -0.337117179 | 3.75E-15 | 4.75E-14 |
| KCTD8  | -0.099086011 | 0.024532 | 0.040114 |
| KCTD9  | 0.103005379  | 0.019382 | 0.032383 |
| KDELC1 | 0.147771937  | 0.000769 | 0.001669 |
| KDELC2 | 0.137960888  | 0.0017   | 0.00347  |
| KDELR1 | 0.16100322   | 0.000244 | 0.000579 |
| KDELR2 | 0.237443798  | 4.94E-08 | 2.13E-07 |
| KDELR3 | 0.125589647  | 0.004311 | 0.008185 |
| KDM1A  | 0.282779131  | 6.34E-11 | 4.19E-10 |
| KDM1B  | 0.102818775  | 0.019604 | 0.032732 |
| KDM2A  | -0.068717625 | 0.119351 | 0.166417 |
| KDM2B  | -0.025823546 | 0.558747 | 0.628206 |
| KDM3A  | 0.017665549  | 0.689192 | 0.745673 |
| KDM3B  | -0.158465852 | 0.000306 | 0.000713 |
| KDM4A  | -0.212770389 | 1.10E-06 | 3.83E-06 |
| KDM4B  | -0.154917206 | 0.000418 | 0.00095  |
| KDM4C  | -0.221679201 | 3.74E-07 | 1.40E-06 |

|           |              |          |          |
|-----------|--------------|----------|----------|
| KDM4DL    | -0.033085569 | 0.45373  | 0.527828 |
| KDM4D     | -0.119075445 | 0.006824 | 0.012504 |
| KDM5A     | 0.106857141  | 0.015265 | 0.026067 |
| KDM5B     | 0.050946153  | 0.248462 | 0.316343 |
| KDM5C     | -0.200924703 | 4.32E-06 | 1.37E-05 |
| KDM5D     | 0.139803303  | 0.00147  | 0.003034 |
| KDM6A     | -0.237129893 | 5.15E-08 | 2.21E-07 |
| KDM6B     | -0.233952486 | 7.83E-08 | 3.27E-07 |
| KDR       | -0.175706904 | 6.10E-05 | 0.00016  |
| KDSR      | 0.012471017  | 0.777686 | 0.821097 |
| KEAP1     | -0.054284724 | 0.218761 | 0.283236 |
| KEL       | -0.232006107 | 1.01E-07 | 4.15E-07 |
| KERA      | -0.105316048 | 0.01681  | 0.028442 |
| KGFLP1    | -0.046177828 | 0.295583 | 0.366895 |
| KGFLP2    | -0.222481962 | 3.38E-07 | 1.28E-06 |
| KHDC1L    | 0.271357273  | 3.83E-10 | 2.26E-09 |
| KHDC1     | -0.017225091 | 0.696552 | 0.752293 |
| KHDRBS1   | 0.258029496  | 2.81E-09 | 1.45E-08 |
| KHDRBS2   | -0.2578243   | 2.90E-09 | 1.49E-08 |
| KHDRBS3   | -0.032055752 | 0.467913 | 0.541742 |
| KHK       | 0.097906616  | 0.026297 | 0.042748 |
| KHNYN     | -0.023345169 | 0.597103 | 0.662829 |
| KHSRP     | 0.131176857  | 0.002859 | 0.005601 |
| KIAA0020  | 0.273184932  | 2.89E-10 | 1.73E-09 |
| KIAA0040  | -0.237781654 | 4.72E-08 | 2.04E-07 |
| KIAA0087  | -0.238324661 | 4.39E-08 | 1.91E-07 |
| KIAA0090  | 0.239233092  | 3.89E-08 | 1.70E-07 |
| KIAA0100  | 0.003078803  | 0.944433 | 0.955911 |
| KIAA0101  | 0.530378916  | 1.06E-38 | 6.21E-36 |
| KIAA0114  | 0.124175944  | 0.004771 | 0.009    |
| KIAA0125  | -0.127335384 | 0.003798 | 0.007277 |
| KIAA0141  | -0.309585786 | 6.68E-13 | 6.01E-12 |
| KIAA0146  | -0.035340113 | 0.423539 | 0.498165 |
| KIAA0174  | -0.051486864 | 0.24347  | 0.310858 |
| KIAA0182  | -0.100971377 | 0.021923 | 0.036239 |
| KIAA0195  | -0.246497684 | 1.44E-08 | 6.75E-08 |
| KIAA0196  | 0.293472936  | 1.09E-11 | 8.11E-11 |
| KIAA0226  | -0.148706635 | 0.000711 | 0.001554 |
| KIAA0232  | -0.165327998 | 0.000164 | 0.000403 |
| KIAA0240  | -0.238130263 | 4.51E-08 | 1.95E-07 |
| KIAA0247  | -0.325605225 | 3.49E-14 | 3.80E-13 |
| KIAA0284  | -0.0973958   | 0.027095 | 0.04392  |
| KIAA0317  | 0.189152517  | 1.55E-05 | 4.52E-05 |
| KIAA0319L | -0.390184196 | 3.57E-20 | 9.58E-19 |

|            |              |          |          |
|------------|--------------|----------|----------|
| KIAA0319   | 0.06536368   | 0.138522 | 0.190072 |
| KIAA0355   | -0.242125588 | 2.63E-08 | 1.18E-07 |
| KIAA0368   | 0.02308453   | 0.601205 | 0.666383 |
| KIAA0391   | 0.293006551  | 1.18E-11 | 8.73E-11 |
| KIAA0406   | 0.267512414  | 6.88E-10 | 3.92E-09 |
| KIAA0408   | -0.41092329  | 2.12E-22 | 7.79E-21 |
| KIAA0415   | -0.094516856 | 0.031991 | 0.051    |
| KIAA0427   | -0.284448295 | 4.84E-11 | 3.26E-10 |
| KIAA0430   | -0.331760339 | 1.07E-14 | 1.26E-13 |
| KIAA0467   | -0.41515381  | 7.11E-23 | 2.85E-21 |
| KIAA0494   | -0.394556296 | 1.25E-20 | 3.55E-19 |
| KIAA0495   | -0.408827558 | 3.61E-22 | 1.30E-20 |
| KIAA0513   | -0.355442298 | 8.80E-17 | 1.41E-15 |
| KIAA0528   | 0.022868401  | 0.604616 | 0.669422 |
| KIAA0556   | -0.235301917 | 6.56E-08 | 2.77E-07 |
| KIAA0562   | -0.223656411 | 2.92E-07 | 1.12E-06 |
| KIAA0564   | 0.014973636  | 0.73461  | 0.785166 |
| KIAA0586   | 0.219137112  | 5.11E-07 | 1.89E-06 |
| KIAA0649   | -0.185891276 | 2.18E-05 | 6.19E-05 |
| KIAA0652   | 0.035933619  | 0.415791 | 0.490546 |
| KIAA0664P3 | -0.352069809 | 1.79E-16 | 2.74E-15 |
| KIAA0664   | 0.005482239  | 0.901228 | 0.922741 |
| KIAA0748   | -0.327690956 | 2.35E-14 | 2.62E-13 |
| KIAA0753   | -0.134456302 | 0.00223  | 0.00446  |
| KIAA0754   | -0.095359397 | 0.030486 | 0.048861 |
| KIAA0776   | -0.004016303 | 0.927554 | 0.943316 |
| KIAA0802   | -0.023783648 | 0.590231 | 0.656339 |
| KIAA0831   | 0.013419801  | 0.761267 | 0.80774  |
| KIAA0892   | -0.370822654 | 3.11E-18 | 6.26E-17 |
| KIAA0895L  | -0.283819195 | 5.36E-11 | 3.58E-10 |
| KIAA0895   | 0.06011661   | 0.173141 | 0.231318 |
| KIAA0907   | -0.164460619 | 0.000178 | 0.000434 |
| KIAA0913   | -0.323573332 | 5.13E-14 | 5.42E-13 |
| KIAA0922   | -0.13658243  | 0.001893 | 0.00383  |
| KIAA0947   | 0.021419322  | 0.627707 | 0.690285 |
| KIAA1009   | -0.27302895  | 2.96E-10 | 1.77E-09 |
| KIAA1012   | 0.035318711  | 0.42382  | 0.49843  |
| KIAA1024   | 0.020944019  | 0.635363 | 0.696748 |
| KIAA1033   | 0.184939314  | 2.41E-05 | 6.78E-05 |
| KIAA1045   | -0.146596305 | 0.000848 | 0.001825 |
| KIAA1107   | -0.088796295 | 0.043989 | 0.068091 |
| KIAA1109   | -0.33957964  | 2.30E-15 | 3.02E-14 |
| KIAA1143   | -0.058497072 | 0.185032 | 0.244848 |
| KIAA1147   | -0.146336433 | 0.000866 | 0.001862 |



|           |              |          |          |
|-----------|--------------|----------|----------|
| KIAA1161  | 0.148935487  | 0.000697 | 0.001527 |
| KIAA1191  | -0.117353917 | 0.007678 | 0.013929 |
| KIAA1199  | 0.109013272  | 0.013313 | 0.023016 |
| KIAA1210  | 0.002249714  | 0.959381 | 0.968882 |
| KIAA1211  | 0.027147155  | 0.538764 | 0.609578 |
| KIAA1217  | -0.165614973 | 0.00016  | 0.000393 |
| KIAA1239  | 0.103279089  | 0.01906  | 0.031902 |
| KIAA1244  | -0.25282268  | 5.94E-09 | 2.94E-08 |
| KIAA1257  | -0.056803412 | 0.198101 | 0.259836 |
| KIAA1267  | -0.274401715 | 2.39E-10 | 1.45E-09 |
| KIAA1274  | -0.335288969 | 5.37E-15 | 6.64E-14 |
| KIAA1279  | 0.179316904  | 4.26E-05 | 0.000115 |
| KIAA1310  | -0.214288093 | 9.19E-07 | 3.25E-06 |
| KIAA1324L | -0.261959207 | 1.58E-09 | 8.50E-09 |
| KIAA1324  | -0.169511864 | 0.000111 | 0.00028  |
| KIAA1328  | -0.282086347 | 7.08E-11 | 4.66E-10 |
| KIAA1370  | -0.276526887 | 1.71E-10 | 1.06E-09 |
| KIAA1377  | -0.169448505 | 0.000112 | 0.000282 |
| KIAA1383  | -0.065241851 | 0.13926  | 0.190941 |
| KIAA1407  | -0.396245069 | 8.27E-21 | 2.44E-19 |
| KIAA1409  | -0.111102593 | 0.011636 | 0.02036  |
| KIAA1429  | 0.338329702  | 2.94E-15 | 3.81E-14 |
| KIAA1430  | 0.0319171    | 0.469841 | 0.543565 |
| KIAA1432  | -0.04222953  | 0.338851 | 0.412921 |
| KIAA1462  | -0.071881866 | 0.103228 | 0.146227 |
| KIAA1467  | -0.106966352 | 0.01516  | 0.025915 |
| KIAA1468  | -0.028102311 | 0.524569 | 0.596556 |
| KIAA1486  | -0.093962898 | 0.033016 | 0.052457 |
| KIAA1522  | -0.152120346 | 0.000532 | 0.001188 |
| KIAA1524  | 0.457081939  | 5.98E-28 | 4.88E-26 |
| KIAA1529  | -0.437996382 | 1.50E-25 | 9.14E-24 |
| KIAA1530  | -0.181499699 | 3.42E-05 | 9.39E-05 |
| KIAA1539  | -0.070568759 | 0.109696 | 0.154397 |
| KIAA1543  | -0.301260007 | 2.89E-12 | 2.34E-11 |
| KIAA1549  | 0.113802867  | 0.009746 | 0.017347 |
| KIAA1586  | 0.115299734  | 0.00882  | 0.015804 |
| KIAA1598  | 0.154527084  | 0.000432 | 0.000981 |
| KIAA1609  | 0.24809322   | 1.16E-08 | 5.48E-08 |
| KIAA1614  | -0.229940671 | 1.32E-07 | 5.33E-07 |
| KIAA1632  | -0.187342955 | 1.88E-05 | 5.39E-05 |
| KIAA1644  | -0.022448243 | 0.611273 | 0.675482 |
| KIAA1671  | -0.307278047 | 1.01E-12 | 8.82E-12 |
| KIAA1683  | -0.407969437 | 4.49E-22 | 1.59E-20 |
| KIAA1704  | 0.063494656  | 0.150186 | 0.20406  |

|           |              |          |          |
|-----------|--------------|----------|----------|
| KIAA1712  | 0.016135761  | 0.714878 | 0.768011 |
| KIAA1715  | 0.23755627   | 4.86E-08 | 2.10E-07 |
| KIAA1731  | -0.035879766 | 0.416491 | 0.491267 |
| KIAA1737  | -0.074155846 | 0.092745 | 0.132841 |
| KIAA1751  | -0.157420292 | 0.000336 | 0.000776 |
| KIAA1755  | -0.133124292 | 0.002468 | 0.004893 |
| KIAA1797  | 0.003978106  | 0.928241 | 0.943749 |
| KIAA1804  | 0.086157499  | 0.050688 | 0.077476 |
| KIAA1826  | -0.13720894  | 0.001803 | 0.003662 |
| KIAA1841  | 0.015568915  | 0.72448  | 0.776414 |
| KIAA1875  | -0.170801684 | 9.81E-05 | 0.00025  |
| KIAA1908  | -0.326905886 | 2.73E-14 | 3.01E-13 |
| KIAA1919  | -0.016481774 | 0.709039 | 0.763304 |
| KIAA1949  | 0.004905581  | 0.911572 | 0.930914 |
| KIAA1958  | -0.008762353 | 0.842756 | 0.87552  |
| KIAA1967  | -0.077390138 | 0.079323 | 0.115814 |
| KIAA1984  | -0.156529885 | 0.000363 | 0.000834 |
| KIAA2013  | 0.029997417  | 0.49698  | 0.570113 |
| KIAA2018  | -0.235839527 | 6.11E-08 | 2.59E-07 |
| KIAA2022  | -0.422691687 | 9.79E-24 | 4.46E-22 |
| KIAA2026  | -0.20715143  | 2.13E-06 | 7.06E-06 |
| KIDINS220 | -0.280779743 | 8.73E-11 | 5.68E-10 |
| KIF11     | 0.508612653  | 3.11E-35 | 9.58E-33 |
| KIF12     | -0.182000119 | 3.25E-05 | 8.95E-05 |
| KIF13A    | -0.283284524 | 5.84E-11 | 3.88E-10 |
| KIF13B    | -0.144104229 | 0.00104  | 0.002205 |
| KIF14     | 0.499789493  | 6.76E-34 | 1.55E-31 |
| KIF15     | 0.451525626  | 3.09E-27 | 2.36E-25 |
| KIF16B    | -0.282249175 | 6.90E-11 | 4.55E-10 |
| KIF17     | -0.230189876 | 1.28E-07 | 5.17E-07 |
| KIF18A    | 0.472179744  | 5.88E-30 | 6.42E-28 |
| KIF18B    | 0.399579009  | 3.66E-21 | 1.15E-19 |
| KIF19     | -0.137929372 | 0.001704 | 0.003478 |
| KIF1A     | 0.022645305  | 0.608147 | 0.672697 |
| KIF1B     | -0.032821914 | 0.457338 | 0.531283 |
| KIF1C     | -0.228353574 | 1.61E-07 | 6.42E-07 |
| KIF20A    | 0.496506246  | 2.08E-33 | 4.37E-31 |
| KIF20B    | 0.428694583  | 1.95E-24 | 9.96E-23 |
| KIF21A    | 0.206715402  | 2.24E-06 | 7.40E-06 |
| KIF21B    | -0.157633745 | 0.000329 | 0.000763 |
| KIF22     | 0.112933806  | 0.010322 | 0.018272 |
| KIF23     | 0.523721014  | 1.29E-37 | 6.16E-35 |
| KIF24     | 0.232625682  | 9.31E-08 | 3.85E-07 |
| KIF25     | -0.106978106 | 0.015149 | 0.0259   |

|         |              |          |          |
|---------|--------------|----------|----------|
| KIF26A  | -0.229911331 | 1.32E-07 | 5.35E-07 |
| KIF26B  | 0.02986956   | 0.498817 | 0.571892 |
| KIF27   | -0.213835144 | 9.70E-07 | 3.42E-06 |
| KIF2A   | 0.153031804  | 0.000492 | 0.001105 |
| KIF2C   | 0.491127567  | 1.27E-32 | 2.25E-30 |
| KIF3A   | -0.150788664 | 0.000596 | 0.00132  |
| KIF3B   | 0.079746294  | 0.070573 | 0.104267 |
| KIF3C   | 0.200520704  | 4.52E-06 | 1.43E-05 |
| KIF4A   | 0.504745721  | 1.21E-34 | 3.23E-32 |
| KIF4B   | 0.423538038  | 7.81E-24 | 3.63E-22 |
| KIF5A   | -0.025337899 | 0.566169 | 0.634941 |
| KIF5B   | 0.212177662  | 1.18E-06 | 4.09E-06 |
| KIF5C   | 0.010295278  | 0.815703 | 0.853135 |
| KIF6    | -0.276999207 | 1.59E-10 | 9.93E-10 |
| KIF7    | -0.229949649 | 1.32E-07 | 5.33E-07 |
| KIF9    | -0.099449098 | 0.02401  | 0.039324 |
| KIFAP3  | -0.099232073 | 0.024321 | 0.039794 |
| KIFC1   | 0.453454953  | 1.75E-27 | 1.36E-25 |
| KIFC2   | -0.063235985 | 0.151858 | 0.205981 |
| KIFC3   | -0.127366762 | 0.003789 | 0.007263 |
| KILLIN  | -0.18690217  | 1.96E-05 | 5.62E-05 |
| KIN     | 0.213710613  | 9.84E-07 | 3.46E-06 |
| KIR2DL1 | 0.054865349  | 0.213866 | 0.277853 |
| KIR2DL3 | 0.097362094  | 0.027148 | 0.043988 |
| KIR2DL4 | 0.206718561  | 2.23E-06 | 7.40E-06 |
| KIR2DS4 | 0.066263602  | 0.13316  | 0.183483 |
| KIR3DL1 | 0.061108101  | 0.166148 | 0.223003 |
| KIR3DL2 | 0.059408591  | 0.178267 | 0.237263 |
| KIR3DL3 | 0.113828972  | 0.009729 | 0.017321 |
| KIR3DP1 | 0.116865701  | 0.007936 | 0.014365 |
| KIR3DX1 | 0.137265964  | 0.001795 | 0.003646 |
| KIRREL2 | -0.110304692 | 0.012253 | 0.021337 |
| KIRREL3 | -0.114404303 | 0.009364 | 0.01671  |
| KIRREL  | -0.161114881 | 0.000241 | 0.000574 |
| KISS1R  | 0.115178934  | 0.008892 | 0.015926 |
| KISS1   | -0.016338551 | 0.711454 | 0.765327 |
| KITLG   | -0.081074371 | 0.066    | 0.09822  |
| KIT     | -0.053991244 | 0.221265 | 0.286052 |
| KLB     | 0.002100016  | 0.962082 | 0.970972 |
| KLC1    | -0.044563539 | 0.312806 | 0.384879 |
| KLC2    | 0.125200758  | 0.004433 | 0.008401 |
| KLC3    | -0.002774821 | 0.949912 | 0.960878 |
| KLC4    | -0.275068268 | 2.15E-10 | 1.32E-09 |
| KLF10   | 0.01750853   | 0.691812 | 0.747901 |

|         |              |          |          |
|---------|--------------|----------|----------|
| KLF11   | -0.252398088 | 6.31E-09 | 3.10E-08 |
| KLF12   | -0.191323663 | 1.23E-05 | 3.64E-05 |
| KLF13   | -0.267150381 | 7.27E-10 | 4.13E-09 |
| KLF14   | 0.059808604  | 0.175357 | 0.233935 |
| KLF15   | -0.341532658 | 1.55E-15 | 2.09E-14 |
| KLF16   | 0.185253774  | 2.33E-05 | 6.58E-05 |
| KLF17   | 0.000186481  | 0.996632 | 0.99768  |
| KLF1    | 0.158439007  | 0.000307 | 0.000715 |
| KLF2    | -0.264679581 | 1.05E-09 | 5.84E-09 |
| KLF3    | 0.021229902  | 0.630753 | 0.692568 |
| KLF4    | -0.057867822 | 0.189811 | 0.250409 |
| KLF5    | -0.003517145 | 0.936537 | 0.950132 |
| KLF6    | -0.083897274 | 0.057085 | 0.086146 |
| KLF7    | 0.043346939  | 0.326213 | 0.399458 |
| KLF8    | -0.328313541 | 2.08E-14 | 2.34E-13 |
| KLF9    | -0.179624602 | 4.13E-05 | 0.000112 |
| KLHDC10 | -0.016414491 | 0.710173 | 0.764292 |
| KLHDC1  | -0.333622421 | 7.45E-15 | 8.98E-14 |
| KLHDC2  | 0.088308981  | 0.045167 | 0.069757 |
| KLHDC3  | -0.044714806 | 0.311165 | 0.383152 |
| KLHDC4  | -0.076283264 | 0.083727 | 0.121359 |
| KLHDC5  | 0.153893109  | 0.000457 | 0.001032 |
| KLHDC7A | -0.395272678 | 1.05E-20 | 3.03E-19 |
| KLHDC7B | 0.027675709  | 0.530885 | 0.602403 |
| KLHDC8A | -0.132512372 | 0.002585 | 0.005108 |
| KLHDC8B | -0.289429796 | 2.14E-11 | 1.52E-10 |
| KLHDC9  | -0.172140262 | 8.62E-05 | 0.000221 |
| KLHL10  | -0.06073491  | 0.168755 | 0.226153 |
| KLHL11  | -0.040359533 | 0.36069  | 0.435434 |
| KLHL12  | 0.0646856    | 0.142671 | 0.195135 |
| KLHL13  | -0.116536296 | 0.008115 | 0.014663 |
| KLHL14  | -0.184063458 | 2.64E-05 | 7.37E-05 |
| KLHL15  | 0.065118451  | 0.140011 | 0.191807 |
| KLHL17  | -0.156104799 | 0.000377 | 0.000862 |
| KLHL18  | 0.071060258  | 0.107238 | 0.151279 |
| KLHL1   | 0.188730649  | 1.62E-05 | 4.71E-05 |
| KLHL20  | -0.206771417 | 2.22E-06 | 7.36E-06 |
| KLHL21  | -0.144244334 | 0.001028 | 0.002183 |
| KLHL22  | -0.201343973 | 4.12E-06 | 1.31E-05 |
| KLHL23  | 0.123186183  | 0.00512  | 0.009604 |
| KLHL24  | -0.178718315 | 4.53E-05 | 0.000122 |
| KLHL25  | 0.133064099  | 0.002479 | 0.004913 |
| KLHL26  | -0.276700768 | 1.67E-10 | 1.04E-09 |
| KLHL28  | 0.170658743  | 9.94E-05 | 0.000253 |

|        |              |          |          |
|--------|--------------|----------|----------|
| KLHL29 | -0.306001407 | 1.26E-12 | 1.09E-11 |
| KLHL2  | -0.016164292 | 0.714396 | 0.767687 |
| KLHL30 | -0.092220638 | 0.036421 | 0.057362 |
| KLHL31 | 0.114244099  | 0.009464 | 0.016877 |
| KLHL32 | -0.196625415 | 6.95E-06 | 2.13E-05 |
| KLHL33 | -0.374398365 | 1.40E-18 | 2.98E-17 |
| KLHL34 | -0.146046617 | 0.000887 | 0.001903 |
| KLHL35 | -0.012027437 | 0.785397 | 0.827632 |
| KLHL36 | -0.032321171 | 0.464234 | 0.538138 |
| KLHL38 | -0.095850824 | 0.029636 | 0.047652 |
| KLHL3  | -0.222542627 | 3.36E-07 | 1.27E-06 |
| KLHL4  | -0.014711195 | 0.739091 | 0.788774 |
| KLHL5  | 0.251045258  | 7.65E-09 | 3.73E-08 |
| KLHL6  | -0.243917894 | 2.06E-08 | 9.41E-08 |
| KLHL7  | 0.169842556  | 0.000107 | 0.000272 |
| KLHL8  | 0.058845646  | 0.182423 | 0.241844 |
| KLHL9  | -0.011263399 | 0.798728 | 0.838981 |
| KLK10  | 0.030829699  | 0.485113 | 0.55884  |
| KLK11  | -0.087886652 | 0.046209 | 0.071218 |
| KLK12  | 0.121862546  | 0.005621 | 0.010465 |
| KLK13  | 0.064840753  | 0.141713 | 0.193931 |
| KLK14  | 0.124185596  | 0.004768 | 0.008995 |
| KLK15  | 0.074681127  | 0.09045  | 0.130028 |
| KLK1   | 0.024902001  | 0.572869 | 0.641003 |
| KLK2   | 0.111089275  | 0.011646 | 0.020374 |
| KLK3   | -0.042630234 | 0.334283 | 0.40804  |
| KLK4   | 0.047936781  | 0.27755  | 0.348078 |
| KLK5   | 0.032261934  | 0.465053 | 0.538869 |
| KLK6   | 0.24105329   | 3.04E-08 | 1.35E-07 |
| KLK7   | 0.011414487  | 0.796087 | 0.836691 |
| KLK8   | 0.233124132  | 8.72E-08 | 3.63E-07 |
| KLK9   | 0.170641292  | 9.96E-05 | 0.000253 |
| KLKB1  | -0.253839001 | 5.14E-09 | 2.56E-08 |
| KLKP1  | 0.11804366   | 0.007325 | 0.013347 |
| KLRA1  | -0.196891742 | 6.75E-06 | 2.07E-05 |
| KLRAQ1 | -0.162792774 | 0.000207 | 0.0005   |
| KLRB1  | -0.198292876 | 5.78E-06 | 1.80E-05 |
| KLRC1  | 0.129995306  | 0.003122 | 0.00608  |
| KLRC2  | 0.180068169  | 3.95E-05 | 0.000107 |
| KLRC3  | 0.169527589  | 0.000111 | 0.00028  |
| KLRC4  | 0.022520165  | 0.610131 | 0.674432 |
| KLRD1  | 0.114583497  | 0.009253 | 0.016532 |
| KLRF1  | -0.05721893  | 0.194834 | 0.256072 |
| KLRG1  | -0.171727844 | 8.97E-05 | 0.00023  |

|         |              |          |          |
|---------|--------------|----------|----------|
| KLRG2   | -0.094452098 | 0.03211  | 0.051173 |
| KLRK1   | -0.094660873 | 0.031729 | 0.050652 |
| KL      | -0.25749591  | 3.04E-09 | 1.56E-08 |
| KMO     | -0.00149815  | 0.972944 | 0.979708 |
| KNCN    | -0.0534803   | 0.225673 | 0.290941 |
| KNDC1   | -0.250896744 | 7.81E-09 | 3.80E-08 |
| KNG1    | 0.130585846  | 0.002988 | 0.005837 |
| KNTC1   | 0.253580919  | 5.34E-09 | 2.65E-08 |
| KPNA1   | 0.23205642   | 1.00E-07 | 4.12E-07 |
| KPNA2   | 0.538140764  | 5.31E-40 | 4.42E-37 |
| KPNA3   | 0.328916265  | 1.85E-14 | 2.11E-13 |
| KPNA4   | 0.393205623  | 1.73E-20 | 4.82E-19 |
| KPNA5   | -0.127486184 | 0.003756 | 0.007204 |
| KPNA6   | -0.018543927 | 0.674601 | 0.732344 |
| KPNA7   | 0.107520887  | 0.014639 | 0.025116 |
| KPNB1   | 0.328427256  | 2.04E-14 | 2.29E-13 |
| KPRP    | 0.031125546  | 0.480931 | 0.554758 |
| KPTN    | 0.086492036  | 0.049795 | 0.076244 |
| KRAS    | 0.209941757  | 1.54E-06 | 5.23E-06 |
| KRBA1   | -0.261365448 | 1.72E-09 | 9.20E-09 |
| KRBA2   | -0.173556722 | 7.52E-05 | 0.000195 |
| KRCC1   | -0.056894689 | 0.19738  | 0.25906  |
| KREMEN1 | -0.073831148 | 0.094188 | 0.134762 |
| KREMEN2 | 0.158078454  | 0.000317 | 0.000736 |
| KRI1    | -0.080297378 | 0.068645 | 0.101718 |
| KRIT1   | -0.021366832 | 0.628551 | 0.690989 |
| KRR1    | 0.39360463   | 1.57E-20 | 4.39E-19 |
| KRT10   | 0.089884014  | 0.041454 | 0.064556 |
| KRT12   | 0.028600401  | 0.517243 | 0.589432 |
| KRT13   | -0.131487829 | 0.002793 | 0.005484 |
| KRT14   | 0.046018504  | 0.297254 | 0.368512 |
| KRT15   | -0.183635843 | 2.75E-05 | 7.68E-05 |
| KRT16   | 0.11426043   | 0.009454 | 0.016861 |
| KRT17   | 0.038451774  | 0.383857 | 0.458472 |
| KRT18   | 0.321825932  | 7.12E-14 | 7.38E-13 |
| KRT19   | 0.001896436  | 0.965755 | 0.973794 |
| KRT1    | -0.24574982  | 1.60E-08 | 7.43E-08 |
| KRT20   | -0.00603155  | 0.891389 | 0.915105 |
| KRT222  | -0.108663255 | 0.013614 | 0.023493 |
| KRT23   | -0.077136824 | 0.080314 | 0.117066 |
| KRT24   | -0.003442937 | 0.937873 | 0.950957 |
| KRT25   | 0.099738645  | 0.0236   | 0.03872  |
| KRT26   | 0.08851867   | 0.044657 | 0.06905  |
| KRT27   | -0.217748134 | 6.05E-07 | 2.20E-06 |

|            |              |          |          |
|------------|--------------|----------|----------|
| KRT28      | 0.05446516   | 0.217231 | 0.281551 |
| KRT2       | -0.105085394 | 0.017052 | 0.028821 |
| KRT31      | -0.047622363 | 0.280717 | 0.351389 |
| KRT32      | -0.184860567 | 2.43E-05 | 6.83E-05 |
| KRT33A     | -0.041908937 | 0.342534 | 0.416584 |
| KRT33B     | -0.081891709 | 0.063308 | 0.094595 |
| KRT34      | 0.094326308  | 0.03234  | 0.051512 |
| KRT35      | -0.022123672 | 0.616436 | 0.679985 |
| KRT36      | -0.091864971 | 0.037152 | 0.058394 |
| KRT37      | 0.010829546  | 0.806324 | 0.845026 |
| KRT38      | -0.024142173 | 0.584639 | 0.651308 |
| KRT39      | -0.161697571 | 0.000229 | 0.000548 |
| KRT3       | 0.020304939  | 0.645717 | 0.706166 |
| KRT40      | -0.086255826 | 0.050424 | 0.077126 |
| KRT4       | -0.174820077 | 6.65E-05 | 0.000174 |
| KRT5       | -0.116460961 | 0.008157 | 0.014729 |
| KRT6A      | 0.231248073  | 1.11E-07 | 4.55E-07 |
| KRT6B      | 0.197763461  | 6.13E-06 | 1.90E-05 |
| KRT6C      | 0.195617368  | 7.76E-06 | 2.36E-05 |
| KRT71      | -0.015746936 | 0.72146  | 0.773717 |
| KRT72      | -0.221592814 | 3.78E-07 | 1.42E-06 |
| KRT73      | -0.205932578 | 2.45E-06 | 8.05E-06 |
| KRT74      | -0.073530155 | 0.095541 | 0.136512 |
| KRT75      | -0.021310781 | 0.629452 | 0.691653 |
| KRT76      | 0.005245462  | 0.905473 | 0.926091 |
| KRT77      | -0.054723401 | 0.215056 | 0.27918  |
| KRT78      | 0.143465895  | 0.001096 | 0.002315 |
| KRT79      | -0.191640281 | 1.19E-05 | 3.53E-05 |
| KRT7       | 0.137923337  | 0.001705 | 0.003479 |
| KRT80      | 0.184019392  | 2.65E-05 | 7.41E-05 |
| KRT81      | 0.115824441  | 0.008515 | 0.0153   |
| KRT82      | 0.067940204  | 0.123599 | 0.171605 |
| KRT83      | 0.210374675  | 1.46E-06 | 4.98E-06 |
| KRT84      | 0.018544392  | 0.674593 | 0.732344 |
| KRT85      | 0.000482679  | 0.991282 | 0.993568 |
| KRT86      | 0.075284977  | 0.087867 | 0.126752 |
| KRT8       | 0.240278544  | 3.38E-08 | 1.49E-07 |
| KRT9       | 0.082520554  | 0.061299 | 0.091951 |
| KRTAP1-1   | 0.022064823  | 0.617375 | 0.680897 |
| KRTAP1-3   | 0.052216005  | 0.23685  | 0.303491 |
| KRTAP1-5   | 0.008144837  | 0.853708 | 0.884394 |
| KRTAP10-10 | -0.044803943 | 0.3102   | 0.382191 |
| KRTAP10-11 | 0.006632953  | 0.880637 | 0.906394 |
| KRTAP10-12 | 0.000862867  | 0.984415 | 0.9883   |

|           |              |          |          |
|-----------|--------------|----------|----------|
| KRTAP10-1 | -0.038802082 | 0.379536 | 0.454262 |
| KRTAP10-2 | -0.071839501 | 0.103431 | 0.146457 |
| KRTAP10-3 | -0.140874921 | 0.00135  | 0.002803 |
| KRTAP10-4 | 0.079638649  | 0.070955 | 0.104776 |
| KRTAP10-5 | -0.008574306 | 0.846088 | 0.878205 |
| KRTAP10-6 | 0.019657355  | 0.65628  | 0.71572  |
| KRTAP10-7 | 0.047345555  | 0.283526 | 0.354328 |
| KRTAP10-9 | 0.034602548  | 0.433285 | 0.507947 |
| KRTAP11-1 | -0.046073257 | 0.296679 | 0.368027 |
| KRTAP12-1 | 0.015256123  | 0.729797 | 0.781066 |
| KRTAP12-2 | -0.015669996 | 0.722765 | 0.774867 |
| KRTAP12-4 | -0.069102106 | 0.117293 | 0.163867 |
| KRTAP13-1 | -0.069121272 | 0.117191 | 0.16378  |
| KRTAP13-2 | 0.009057655  | 0.837529 | 0.870904 |
| KRTAP13-4 | -0.092712164 | 0.035431 | 0.055967 |
| KRTAP17-1 | -0.01676202  | 0.704322 | 0.759343 |
| KRTAP19-1 | -0.031632199 | 0.473816 | 0.547562 |
| KRTAP19-3 | -0.05113507  | 0.24671  | 0.314408 |
| KRTAP19-5 | 0.023678399  | 0.591877 | 0.657868 |
| KRTAP19-8 | 0.005567917  | 0.899692 | 0.921688 |
| KRTAP2-1  | 0.030682482  | 0.487201 | 0.560631 |
| KRTAP2-2  | 0.007406077  | 0.866847 | 0.895706 |
| KRTAP20-4 | -0.020246691 | 0.646664 | 0.707047 |
| KRTAP21-2 | 0.027162995  | 0.538527 | 0.609345 |
| KRTAP26-1 | -0.014702767 | 0.739235 | 0.788886 |
| KRTAP3-1  | -0.008441702 | 0.848439 | 0.880234 |
| KRTAP3-2  | 0.009036238  | 0.837908 | 0.871115 |
| KRTAP3-3  | 0.030724134  | 0.486609 | 0.560016 |
| KRTAP4-11 | -0.081600624 | 0.064256 | 0.095847 |
| KRTAP4-12 | -0.050625902 | 0.251453 | 0.319554 |
| KRTAP4-1  | 0.159660977  | 0.000275 | 0.000647 |
| KRTAP4-2  | 0.054052731  | 0.220739 | 0.285519 |
| KRTAP4-3  | -0.047989443 | 0.277022 | 0.347567 |
| KRTAP4-4  | 0.082774191  | 0.060504 | 0.090854 |
| KRTAP4-5  | -0.028411197 | 0.520019 | 0.592191 |
| KRTAP4-7  | -0.039247721 | 0.374083 | 0.448999 |
| KRTAP4-8  | -0.053621437 | 0.22445  | 0.289607 |
| KRTAP4-9  | -0.061282394 | 0.164941 | 0.221562 |
| KRTAP5-10 | -0.257195665 | 3.17E-09 | 1.62E-08 |
| KRTAP5-11 | -0.110911176 | 0.011781 | 0.020575 |
| KRTAP5-1  | -0.10257558  | 0.019896 | 0.033168 |
| KRTAP5-2  | -0.136556364 | 0.001896 | 0.003837 |
| KRTAP5-3  | -0.036814454 | 0.404447 | 0.479199 |
| KRTAP5-4  | -0.007614948 | 0.863128 | 0.892417 |



|          |              |          |          |
|----------|--------------|----------|----------|
| KRTAP5-5 | -0.00081884  | 0.98521  | 0.988871 |
| KRTAP5-6 | 0.016318576  | 0.711791 | 0.765566 |
| KRTAP5-7 | -0.148670697 | 0.000713 | 0.001558 |
| KRTAP5-8 | -0.279158229 | 1.13E-10 | 7.21E-10 |
| KRTAP5-9 | -0.350489671 | 2.49E-16 | 3.73E-15 |
| KRTAP6-3 | 0.068519826  | 0.120421 | 0.167757 |
| KRTAP7-1 | 0.0131041    | 0.766719 | 0.812274 |
| KRTAP8-1 | 0.014916387  | 0.735587 | 0.785958 |
| KRTAP9-2 | 0.031776768  | 0.471797 | 0.545512 |
| KRTAP9-4 | 0.053665735  | 0.224066 | 0.289206 |
| KRTAP9-9 | 0.048481752  | 0.272118 | 0.342124 |
| KRTCAP2  | 0.12307605   | 0.00516  | 0.009674 |
| KRTCAP3  | -0.001220301 | 0.977961 | 0.983719 |
| KRTDAP   | -0.05849182  | 0.185072 | 0.244884 |
| KSR1     | -0.046539484 | 0.291812 | 0.363072 |
| KSR2     | -0.2164967   | 7.05E-07 | 2.53E-06 |
| KTELC1   | -0.055542928 | 0.208255 | 0.271515 |
| KTI12    | 0.113689634  | 0.009819 | 0.017467 |
| KTN1     | 0.2456782    | 1.62E-08 | 7.50E-08 |
| KYNU     | 0.265175404  | 9.78E-10 | 5.46E-09 |
| KY       | -0.122945992 | 0.005207 | 0.009752 |
| L1CAM    | 0.011336053  | 0.797457 | 0.837911 |
| L1TD1    | -0.20844605  | 1.83E-06 | 6.16E-06 |
| L2HGDH   | 0.468814587  | 1.68E-29 | 1.70E-27 |
| L3MBTL2  | -0.277611287 | 1.44E-10 | 9.08E-10 |
| L3MBTL3  | 0.017684173  | 0.688881 | 0.745377 |
| L3MBTL4  | -0.242078614 | 2.65E-08 | 1.19E-07 |
| L3MBTL   | -0.304160935 | 1.74E-12 | 1.47E-11 |
| LACE1    | -0.044831981 | 0.309897 | 0.381935 |
| LACRT    | -0.05531957  | 0.210093 | 0.27359  |
| LACTB2   | 0.132430319  | 0.002601 | 0.005137 |
| LACTB    | 0.02816004   | 0.523717 | 0.595689 |
| LAD1     | -0.037779134 | 0.392237 | 0.467169 |
| LAG3     | -0.009527133 | 0.829234 | 0.864077 |
| LAGE3    | 0.172176243  | 8.60E-05 | 0.000221 |
| LAIR1    | -0.162431023 | 0.000214 | 0.000516 |
| LAIR2    | 0.049640698  | 0.260808 | 0.329605 |
| LALBA    | 0.088562109  | 0.044552 | 0.068893 |
| LAMA1    | 0.04058142   | 0.358054 | 0.432591 |
| LAMA2    | -0.324849944 | 4.03E-14 | 4.34E-13 |
| LAMA3    | 0.05866894   | 0.183742 | 0.243399 |
| LAMA4    | -0.044047133 | 0.318452 | 0.391104 |
| LAMA5    | -0.10181999  | 0.02083  | 0.034597 |
| LAMB1    | 0.071876318  | 0.103254 | 0.146237 |

|         |              |          |          |
|---------|--------------|----------|----------|
| LAMB2L  | -0.316364683 | 1.96E-13 | 1.90E-12 |
| LAMB2   | -0.349977093 | 2.77E-16 | 4.13E-15 |
| LAMB3   | 0.118974354  | 0.006872 | 0.012582 |
| LAMB4   | 0.000573703  | 0.989638 | 0.992368 |
| LAMC1   | 0.179278363  | 4.28E-05 | 0.000115 |
| LAMC2   | 0.198973831  | 5.36E-06 | 1.67E-05 |
| LAMC3   | -0.172321757 | 8.48E-05 | 0.000218 |
| LAMP1   | -0.134593148 | 0.002207 | 0.004415 |
| LAMP2   | -0.01160164  | 0.792819 | 0.833957 |
| LAMP3   | -0.330877023 | 1.27E-14 | 1.47E-13 |
| LANCL1  | 0.025780149  | 0.559409 | 0.628772 |
| LANCL2  | 0.074880268  | 0.089591 | 0.128905 |
| LANCL3  | -0.271985258 | 3.47E-10 | 2.06E-09 |
| LAP3    | 0.016189072  | 0.713977 | 0.767422 |
| LAPTM4A | -0.097529316 | 0.026884 | 0.043628 |
| LAPTM4B | 0.211565952  | 1.27E-06 | 4.38E-06 |
| LAPTM5  | -0.140349792 | 0.001407 | 0.002916 |
| LARGE   | -0.268448897 | 5.97E-10 | 3.43E-09 |
| LARP1B  | 0.262709613  | 1.41E-09 | 7.65E-09 |
| LARP1   | 0.110901062  | 0.011789 | 0.020587 |
| LARP4B  | -0.063242224 | 0.151817 | 0.20594  |
| LARP4   | 0.393690272  | 1.54E-20 | 4.30E-19 |
| LARP6   | 0.025458041  | 0.564328 | 0.633234 |
| LARP7   | -0.027473281 | 0.533896 | 0.60516  |
| LARS2   | 0.159345846  | 0.000283 | 0.000665 |
| LARS    | 0.04703256   | 0.286724 | 0.357654 |
| LAS1L   | 0.044665783  | 0.311696 | 0.383703 |
| LASP1   | -0.006005526 | 0.891855 | 0.915489 |
| LASS1   | 0.058011053  | 0.188716 | 0.249161 |
| LASS2   | 0.005386343  | 0.902947 | 0.924075 |
| LASS3   | -0.045096925 | 0.307044 | 0.378886 |
| LASS4   | -0.284911562 | 4.49E-11 | 3.04E-10 |
| LASS5   | -0.001106663 | 0.980013 | 0.985237 |
| LASS6   | 0.072742313  | 0.099156 | 0.141223 |
| LAT2    | -0.110521192 | 0.012083 | 0.021065 |
| LATS1   | 0.005687831  | 0.897544 | 0.919913 |
| LATS2   | -0.094054649 | 0.032844 | 0.052226 |
| LAT     | -0.203423048 | 3.26E-06 | 1.05E-05 |
| LAX1    | -0.076166349 | 0.084204 | 0.122006 |
| LAYN    | -0.002574707 | 0.95352  | 0.964215 |
| LBH     | -0.256075876 | 3.73E-09 | 1.89E-08 |
| LBP     | 0.197859604  | 6.07E-06 | 1.88E-05 |
| LBR     | 0.306445747  | 1.17E-12 | 1.01E-11 |
| LBX1    | 0.021180477  | 0.631549 | 0.693327 |

|         |              |          |          |
|---------|--------------|----------|----------|
| LBX2    | -0.020086908 | 0.649266 | 0.70927  |
| LBXCOR1 | -0.315189343 | 2.43E-13 | 2.33E-12 |
| LCA5L   | -0.261924493 | 1.59E-09 | 8.53E-09 |
| LCA5    | -0.375598507 | 1.06E-18 | 2.30E-17 |
| LCAT    | -0.426219379 | 3.81E-24 | 1.88E-22 |
| LCE1B   | -0.042190979 | 0.339292 | 0.413397 |
| LCE1C   | -0.038377326 | 0.384779 | 0.459429 |
| LCE1E   | -0.006732374 | 0.878862 | 0.905219 |
| LCE1F   | -0.053142922 | 0.228618 | 0.294359 |
| LCE2A   | -0.013314157 | 0.76309  | 0.809416 |
| LCE2B   | -0.008758898 | 0.842817 | 0.875538 |
| LCE2C   | -0.003924244 | 0.92921  | 0.944616 |
| LCE2D   | 0.046907067  | 0.288014 | 0.35897  |
| LCE3A   | 0.072262584  | 0.10141  | 0.144026 |
| LCE3D   | 0.120790834  | 0.006059 | 0.011198 |
| LCE3E   | 0.095846769  | 0.029643 | 0.047659 |
| LCE5A   | 0.05509403   | 0.211961 | 0.275627 |
| LCK     | -0.119670674 | 0.006549 | 0.012034 |
| LCLAT1  | 0.30372502   | 1.88E-12 | 1.58E-11 |
| LCMT1   | 0.066427726  | 0.132199 | 0.182285 |
| LCMT2   | -0.098338681 | 0.025638 | 0.041765 |
| LCN10   | -0.215540167 | 7.91E-07 | 2.82E-06 |
| LCN12   | -0.181002611 | 3.60E-05 | 9.84E-05 |
| LCN15   | 0.146961851  | 0.000822 | 0.001776 |
| LCN1    | 0.194552107  | 8.71E-06 | 2.63E-05 |
| LCN2    | 0.067886372  | 0.123897 | 0.171964 |
| LCN6    | -0.208913368 | 1.73E-06 | 5.85E-06 |
| LCN8    | -0.022513089 | 0.610243 | 0.674493 |
| LCN9    | 0.006434534  | 0.884182 | 0.909247 |
| LCNL1   | -0.304950217 | 1.52E-12 | 1.29E-11 |
| LCORL   | 0.050927337  | 0.248637 | 0.316525 |
| LCOR    | 0.035761437  | 0.41803  | 0.492723 |
| LCP1    | -0.176525289 | 5.63E-05 | 0.000149 |
| LCP2    | -0.146591937 | 0.000848 | 0.001826 |
| LCTL    | 0.169395455  | 0.000112 | 0.000283 |
| LCT     | -0.173672618 | 7.44E-05 | 0.000193 |
| LDB1    | -0.385348612 | 1.12E-19 | 2.81E-18 |
| LDB2    | -0.257461595 | 3.05E-09 | 1.56E-08 |
| LDB3    | -0.334388117 | 6.41E-15 | 7.85E-14 |
| LDHAL6A | -0.023095692 | 0.601029 | 0.666225 |
| LDHAL6B | 0.056385686  | 0.201425 | 0.263781 |
| LDHA    | 0.441452813  | 5.64E-26 | 3.64E-24 |
| LDHB    | 0.254322102  | 4.80E-09 | 2.40E-08 |
| LDHC    | 0.057299636  | 0.194204 | 0.255345 |

|          |              |          |          |
|----------|--------------|----------|----------|
| LDHD     | -0.208929642 | 1.73E-06 | 5.84E-06 |
| LDLRAD1  | -0.038610214 | 0.381899 | 0.456516 |
| LDLRAD2  | -0.283845984 | 5.34E-11 | 3.57E-10 |
| LDLRAD3  | 0.080147353  | 0.069165 | 0.102429 |
| LDLRAP1  | -0.408159242 | 4.28E-22 | 1.53E-20 |
| LDLR     | -0.102798383 | 0.019628 | 0.032768 |
| LDOC1L   | -0.028422134 | 0.519858 | 0.59211  |
| LDOC1    | -0.173598291 | 7.49E-05 | 0.000194 |
| LEAP2    | -0.120506837 | 0.00618  | 0.011406 |
| LECT1    | -0.112005808 | 0.01097  | 0.01931  |
| LECT2    | 0.016166208  | 0.714364 | 0.767687 |
| LEF1     | -0.052233604 | 0.236692 | 0.303366 |
| LEFTY1   | -0.051441629 | 0.243885 | 0.311307 |
| LEFTY2   | -0.398580174 | 4.67E-21 | 1.43E-19 |
| LEKR1    | -0.180471408 | 3.80E-05 | 0.000103 |
| LELP1    | 0.004518127  | 0.918531 | 0.936141 |
| LEMD1    | -0.161205626 | 0.000239 | 0.00057  |
| LEMD2    | -0.032515952 | 0.461544 | 0.535424 |
| LEMD3    | 0.144135668  | 0.001038 | 0.0022   |
| LENEP    | -0.003668585 | 0.933811 | 0.948232 |
| LENG1    | -0.179354906 | 4.25E-05 | 0.000115 |
| LENG8    | -0.367564658 | 6.42E-18 | 1.24E-16 |
| LENG9    | 0.027261133  | 0.53706  | 0.607902 |
| LEO1     | 0.236010204  | 5.97E-08 | 2.54E-07 |
| LEPRE1   | 0.061857948  | 0.161001 | 0.216882 |
| LEPREL1  | -0.235848486 | 6.10E-08 | 2.59E-07 |
| LEPREL2  | -0.033861448 | 0.443206 | 0.517393 |
| LEPROTL1 | 0.059100866  | 0.18053  | 0.239764 |
| LEPROT   | 0.094478114  | 0.032062 | 0.051101 |
| LEPR     | -0.040286616 | 0.361559 | 0.436272 |
| LEP      | 0.156699617  | 0.000358 | 0.000823 |
| LETM1    | 0.212474086  | 1.14E-06 | 3.96E-06 |
| LETM2    | 0.101611755  | 0.021094 | 0.034995 |
| LETMD1   | -0.08149944  | 0.064588 | 0.096278 |
| LEUTX    | 0.027034402  | 0.540452 | 0.611281 |
| LFNG     | -0.074987954 | 0.08913  | 0.128352 |
| LGALS12  | -0.121257722 | 0.005865 | 0.010872 |
| LGALS13  | 0.035635456  | 0.419673 | 0.494309 |
| LGALS14  | 0.094317002  | 0.032358 | 0.051535 |
| LGALS1   | 0.146334478  | 0.000866 | 0.001862 |
| LGALS2   | -0.241497497 | 2.87E-08 | 1.28E-07 |
| LGALS3BP | -0.165687236 | 0.000159 | 0.000391 |
| LGALS3   | -0.037937247 | 0.390258 | 0.464978 |
| LGALS4   | -0.162951606 | 0.000204 | 0.000493 |

|         |              |          |          |
|---------|--------------|----------|----------|
| LGALS7B | 0.124344757  | 0.004714 | 0.0089   |
| LGALS7  | 0.084556322  | 0.055154 | 0.08358  |
| LGALS8  | -0.080635032 | 0.067485 | 0.100197 |
| LGALS9B | -0.149383625 | 0.000672 | 0.001474 |
| LGALS9C | -0.287015012 | 3.19E-11 | 2.21E-10 |
| LGALS9  | -0.319514912 | 1.09E-13 | 1.11E-12 |
| LGI1    | -0.019453614 | 0.659617 | 0.718754 |
| LGI2    | 0.079199539  | 0.07253  | 0.106842 |
| LGI3    | -0.309066642 | 7.33E-13 | 6.56E-12 |
| LGI4    | -0.279200163 | 1.12E-10 | 7.17E-10 |
| LGMN    | -0.126893595 | 0.003922 | 0.007501 |
| LGR4    | 0.162801646  | 0.000207 | 0.0005   |
| LGR5    | -0.106580021 | 0.015533 | 0.026478 |
| LGR6    | -0.298607077 | 4.57E-12 | 3.57E-11 |
| LGSN    | 0.129505731  | 0.003238 | 0.006284 |
| LGTN    | 0.047483289  | 0.282126 | 0.352821 |
| LHB     | -0.053696068 | 0.223804 | 0.288923 |
| LHCGR   | -0.180445629 | 3.81E-05 | 0.000104 |
| LHFPL1  | -0.15689859  | 0.000351 | 0.00081  |
| LHFPL2  | -0.022341991 | 0.612961 | 0.676898 |
| LHFPL3  | -0.323254036 | 5.44E-14 | 5.72E-13 |
| LHFPL4  | -0.150348852 | 0.000619 | 0.001366 |
| LHFPL5  | 0.174108738  | 7.13E-05 | 0.000186 |
| LHFP    | -0.311224393 | 4.98E-13 | 4.55E-12 |
| LHPP    | -0.079176187 | 0.072614 | 0.106942 |
| LHX1    | 0.205772829  | 2.49E-06 | 8.20E-06 |
| LHX2    | 0.102131611  | 0.02044  | 0.033993 |
| LHX3    | -0.029077045 | 0.510282 | 0.582596 |
| LHX4    | -0.178781743 | 4.50E-05 | 0.000121 |
| LHX5    | 0.116358906  | 0.008213 | 0.014821 |
| LHX6    | -0.17311866  | 7.85E-05 | 0.000203 |
| LHX8    | 0.028426851  | 0.519789 | 0.592064 |
| LHX9    | -0.230509932 | 1.22E-07 | 4.98E-07 |
| LIAS    | 0.071631912  | 0.104435 | 0.147679 |
| LIFR    | -0.232837343 | 9.06E-08 | 3.76E-07 |
| LIF     | 0.014940365  | 0.735178 | 0.785647 |
| LIG1    | 0.03578286   | 0.417751 | 0.492452 |
| LIG3    | 0.214911804  | 8.53E-07 | 3.03E-06 |
| LIG4    | -0.12413474  | 0.004785 | 0.009024 |
| LILRA1  | -0.156133674 | 0.000376 | 0.00086  |
| LILRA2  | -0.147099827 | 0.000813 | 0.001757 |
| LILRA3  | 0.123627709  | 0.004961 | 0.009327 |
| LILRA4  | -0.216064222 | 7.42E-07 | 2.66E-06 |
| LILRA5  | 0.093886769  | 0.033158 | 0.052664 |

|                 |              |          |          |
|-----------------|--------------|----------|----------|
| LILRA6          | -0.088668355 | 0.044296 | 0.068534 |
| LILRB1          | -0.128295023 | 0.00354  | 0.006821 |
| LILRB2          | -0.025057781 | 0.57047  | 0.63862  |
| LILRB3          | -0.084465429 | 0.055417 | 0.083934 |
| LILRB4          | -0.046373277 | 0.293541 | 0.364836 |
| LILRB5          | -0.165080603 | 0.000168 | 0.000412 |
| LILRP2          | 0.181233863  | 3.52E-05 | 9.64E-05 |
| LIM2            | 0.015942015  | 0.718155 | 0.770917 |
| LIMA1           | -0.079227573 | 0.072428 | 0.106715 |
| LIMCH1          | -0.203956989 | 3.07E-06 | 9.93E-06 |
| LIMD1           | -0.292308287 | 1.33E-11 | 9.75E-11 |
| LIMD2           | -0.137589619 | 0.00175  | 0.003561 |
| LIME1           | -0.123962215 | 0.004845 | 0.009129 |
| LIMK1           | 0.037385638  | 0.39719  | 0.472028 |
| LIMK2           | -0.168137895 | 0.000126 | 0.000316 |
| LIMS1           | 0.114557149  | 0.009269 | 0.016558 |
| LIMS2           | -0.408076164 | 4.37E-22 | 1.56E-20 |
| LIMS3-LOC440895 | -0.05410584  | 0.220285 | 0.284969 |
| LIMS3           | 0.100483324  | 0.022574 | 0.037198 |
| LIN28A          | 0.182024208  | 3.25E-05 | 8.93E-05 |
| LIN28B          | 0.25023191   | 8.58E-09 | 4.15E-08 |
| LIN37           | 0.0344994    | 0.434658 | 0.509288 |
| LIN52           | 0.159111247  | 0.000289 | 0.000677 |
| LIN54           | 0.300411306  | 3.35E-12 | 2.68E-11 |
| LIN7A           | 0.012928613  | 0.769754 | 0.814842 |
| LIN7B           | -0.082807353 | 0.060401 | 0.090712 |
| LIN7C           | 0.146829461  | 0.000831 | 0.001793 |
| LIN9            | 0.417217731  | 4.15E-23 | 1.73E-21 |
| LINGO1          | 0.035188677  | 0.42553  | 0.500176 |
| LINGO2          | 0.159821468  | 0.000271 | 0.000639 |
| LINGO3          | -0.19898014  | 5.36E-06 | 1.67E-05 |
| LINGO4          | -0.185789718 | 2.21E-05 | 6.25E-05 |
| LINS1           | -0.113611464 | 0.00987  | 0.017553 |
| LIPA            | -0.211046553 | 1.35E-06 | 4.64E-06 |
| LIPC            | 0.087220976  | 0.047893 | 0.073495 |
| LIPE            | -0.201928981 | 3.86E-06 | 1.23E-05 |
| LIPF            | -0.147690487 | 0.000774 | 0.00168  |
| LIPG            | 0.032789767  | 0.457779 | 0.531703 |
| LIPH            | -0.202741853 | 3.52E-06 | 1.13E-05 |
| LIPI            | 0.046928913  | 0.287789 | 0.358713 |
| LIPJ            | -0.131630633 | 0.002763 | 0.005429 |
| LIPK            | 0.121994383  | 0.005569 | 0.010375 |
| LIPM            | -0.059509423 | 0.177531 | 0.236471 |
| LIPN            | -0.126454635 | 0.004049 | 0.007725 |

|              |              |          |          |
|--------------|--------------|----------|----------|
| LIPT1        | -0.100165387 | 0.023007 | 0.037862 |
| LIPT2        | 0.115063358  | 0.008961 | 0.016039 |
| LITAF        | -0.212733882 | 1.11E-06 | 3.85E-06 |
| LIX1L        | -0.182343957 | 3.14E-05 | 8.67E-05 |
| LIX1         | 0.000635607  | 0.988519 | 0.991496 |
| LLGL1        | -0.025808566 | 0.558976 | 0.628356 |
| LLGL2        | -0.20665651  | 2.25E-06 | 7.45E-06 |
| LLPH         | 0.373774292  | 1.61E-18 | 3.37E-17 |
| LMAN1L       | -0.164676639 | 0.000174 | 0.000426 |
| LMAN1        | 0.27698791   | 1.59E-10 | 9.94E-10 |
| LMAN2L       | -0.012625091 | 0.775013 | 0.819167 |
| LMAN2        | -0.013573824 | 0.758611 | 0.80535  |
| LMBR1L       | -0.077010102 | 0.080814 | 0.117708 |
| LMBR1        | 0.243668942  | 2.13E-08 | 9.71E-08 |
| LMBRD1       | -0.170201801 | 0.000104 | 0.000264 |
| LMBRD2       | -0.044257039 | 0.316149 | 0.388538 |
| LMCD1        | -0.124011691 | 0.004828 | 0.009099 |
| LMF1         | -0.383671736 | 1.66E-19 | 4.06E-18 |
| LMF2         | -0.278380093 | 1.28E-10 | 8.11E-10 |
| LMLN         | -0.142592294 | 0.001176 | 0.00247  |
| LMNA         | -0.103313502 | 0.01902  | 0.031848 |
| LMNB1        | 0.383317539  | 1.80E-19 | 4.38E-18 |
| LMNB2        | 0.324556604  | 4.26E-14 | 4.58E-13 |
| LMO1         | 0.148689909  | 0.000712 | 0.001556 |
| LMO2         | -0.305442122 | 1.39E-12 | 1.19E-11 |
| LMO3         | -0.309232806 | 7.11E-13 | 6.38E-12 |
| LMO4         | 0.005146935  | 0.907241 | 0.927519 |
| LMO7         | -0.18234798  | 3.14E-05 | 8.67E-05 |
| LMOD1        | -0.316629732 | 1.86E-13 | 1.82E-12 |
| LMOD2        | -0.038589168 | 0.382159 | 0.456772 |
| LMOD3        | -0.31098366  | 5.20E-13 | 4.75E-12 |
| LMTK2        | 0.006962519  | 0.874754 | 0.902197 |
| LMTK3        | -0.167658979 | 0.000132 | 0.000329 |
| LMX1A        | 0.095195902  | 0.030773 | 0.049259 |
| LMX1B        | -0.092466019 | 0.035924 | 0.056673 |
| LNP1         | -0.02546456  | 0.564229 | 0.633193 |
| LNPEP        | 0.04669639   | 0.290187 | 0.361319 |
| LNX1         | -0.123884279 | 0.004872 | 0.009175 |
| LNX2         | -0.14849275  | 0.000724 | 0.00158  |
| LOC100009676 | -0.189037521 | 1.57E-05 | 4.57E-05 |
| LOC100101266 | -0.216907559 | 6.70E-07 | 2.42E-06 |
| LOC100101938 | -0.034887093 | 0.42951  | 0.504142 |
| LOC100124692 | -0.10047896  | 0.02258  | 0.037202 |
| LOC100125556 | 0.121585293  | 0.005731 | 0.010647 |

|              |              |          |          |
|--------------|--------------|----------|----------|
| LOC100126784 | 0.002086348  | 0.962329 | 0.971098 |
| LOC100127888 | 0.043770095  | 0.321508 | 0.394397 |
| LOC100128023 | -0.038698555 | 0.38081  | 0.45535  |
| LOC100128076 | -0.109972793 | 0.012518 | 0.02175  |
| LOC100128164 | -0.198797299 | 5.47E-06 | 1.71E-05 |
| LOC100128191 | 0.289707585  | 2.04E-11 | 1.46E-10 |
| LOC100128239 | -0.30674165  | 1.11E-12 | 9.64E-12 |
| LOC100128288 | -0.283560516 | 5.59E-11 | 3.72E-10 |
| LOC100128292 | -0.053969777 | 0.221449 | 0.28622  |
| LOC100128542 | -0.024061346 | 0.585897 | 0.652455 |
| LOC100128554 | -0.160524731 | 0.000254 | 0.000603 |
| LOC100128573 | -0.189363254 | 1.52E-05 | 4.43E-05 |
| LOC100128640 | -0.095040959 | 0.031047 | 0.049658 |
| LOC100128675 | -0.205556067 | 2.55E-06 | 8.38E-06 |
| LOC100128788 | -0.1407661   | 0.001362 | 0.002827 |
| LOC100128811 | -0.021366544 | 0.628555 | 0.690989 |
| LOC100128822 | -0.072097021 | 0.102197 | 0.144935 |
| LOC100128842 | -0.277467541 | 1.48E-10 | 9.28E-10 |
| LOC100128977 | -0.012878652 | 0.770619 | 0.815455 |
| LOC100129034 | -0.284825011 | 4.55E-11 | 3.08E-10 |
| LOC100129055 | -0.067989737 | 0.123325 | 0.17136  |
| LOC100129066 | 0.027313933  | 0.536272 | 0.60724  |
| LOC100129387 | -0.217854639 | 5.98E-07 | 2.18E-06 |
| LOC100129534 | -0.321731939 | 7.24E-14 | 7.50E-13 |
| LOC100129550 | -0.346117815 | 6.12E-16 | 8.73E-15 |
| LOC100129637 | -0.135526609 | 0.002054 | 0.004136 |
| LOC100129716 | -0.206838247 | 2.20E-06 | 7.31E-06 |
| LOC100129726 | -0.245531168 | 1.65E-08 | 7.64E-08 |
| LOC100129935 | 0.016075454  | 0.715897 | 0.768824 |
| LOC100130015 | -0.205215297 | 2.66E-06 | 8.69E-06 |
| LOC100130093 | -0.250254163 | 8.55E-09 | 4.14E-08 |
| LOC100130148 | -0.01680482  | 0.703602 | 0.7588   |
| LOC100130238 | 0.033449317  | 0.448778 | 0.523043 |
| LOC100130264 | 0.02388402   | 0.588663 | 0.654914 |
| LOC100130274 | 0.065886517  | 0.135387 | 0.186253 |
| LOC100130331 | 0.125253071  | 0.004417 | 0.008371 |
| LOC100130386 | -0.053918955 | 0.221885 | 0.286723 |
| LOC100130522 | -0.14344389  | 0.001098 | 0.002318 |
| LOC100130557 | -0.343892861 | 9.63E-16 | 1.33E-14 |
| LOC100130581 | -0.182268167 | 3.17E-05 | 8.73E-05 |
| LOC100130691 | -0.094054782 | 0.032844 | 0.052226 |
| LOC100130776 | -0.057555903 | 0.192214 | 0.253127 |
| LOC100130872 | -0.115040563 | 0.008975 | 0.016059 |
| LOC100130932 | 0.206257513  | 2.36E-06 | 7.78E-06 |



|              |              |          |          |
|--------------|--------------|----------|----------|
| LOC100130933 | -0.174225955 | 7.05E-05 | 0.000184 |
| LOC100130987 | -0.147760792 | 0.000769 | 0.00167  |
| LOC100131193 | -0.247085113 | 1.33E-08 | 6.24E-08 |
| LOC100131434 | -0.393904012 | 1.46E-20 | 4.10E-19 |
| LOC100131496 | -0.021157658 | 0.631917 | 0.693693 |
| LOC100131551 | 0.257686471  | 2.95E-09 | 1.52E-08 |
| LOC100131691 | -0.225966497 | 2.19E-07 | 8.53E-07 |
| LOC100131726 | 0.308024886  | 8.82E-13 | 7.79E-12 |
| LOC100132111 | 0.159903184  | 0.000269 | 0.000635 |
| LOC100132215 | -0.131834132 | 0.002721 | 0.005357 |
| LOC100132247 | -0.286481423 | 3.48E-11 | 2.39E-10 |
| LOC100132287 | -0.266923773 | 7.52E-10 | 4.26E-09 |
| LOC100132288 | -0.107230398 | 0.01491  | 0.025549 |
| LOC100132354 | 0.154538976  | 0.000432 | 0.000981 |
| LOC100132707 | -0.381614539 | 2.68E-19 | 6.39E-18 |
| LOC100132724 | 0.139957362  | 0.001452 | 0.002999 |
| LOC100132831 | 0.122694268  | 0.005301 | 0.009912 |
| LOC100132832 | -0.301236239 | 2.90E-12 | 2.35E-11 |
| LOC100133050 | -0.125318382 | 0.004396 | 0.008337 |
| LOC100133161 | -0.246049474 | 1.54E-08 | 7.14E-08 |
| LOC100133308 | 0.011915675  | 0.787343 | 0.829158 |
| LOC100133331 | -0.318440752 | 1.34E-13 | 1.33E-12 |
| LOC100133469 | 0.111856172  | 0.011078 | 0.01948  |
| LOC100133545 | -0.111248375 | 0.011526 | 0.020193 |
| LOC100133612 | -0.035877139 | 0.416525 | 0.491267 |
| LOC100133669 | -0.110051654 | 0.012455 | 0.021652 |
| LOC100133893 | -0.059228272 | 0.179591 | 0.238754 |
| LOC100133920 | 0.039680795  | 0.36883  | 0.44352  |
| LOC100133957 | 0.038837709  | 0.379099 | 0.45382  |
| LOC100133985 | 0.177188505  | 5.27E-05 | 0.00014  |
| LOC100133991 | -0.045052941 | 0.307516 | 0.379408 |
| LOC100134229 | 0.007122543  | 0.8719   | 0.900183 |
| LOC100134259 | -0.032597173 | 0.460426 | 0.534362 |
| LOC100134368 | -0.146051662 | 0.000887 | 0.001902 |
| LOC100134713 | -0.080084383 | 0.069385 | 0.102723 |
| LOC100134868 | -0.073131812 | 0.097355 | 0.138886 |
| LOC100144603 | 0.079968272  | 0.069791 | 0.103248 |
| LOC100144604 | -0.2676893   | 6.70E-10 | 3.82E-09 |
| LOC100170939 | -0.298766838 | 4.44E-12 | 3.48E-11 |
| LOC100188947 | 0.041214349  | 0.3506   | 0.425172 |
| LOC100188949 | -0.227590811 | 1.78E-07 | 7.04E-07 |
| LOC100189589 | -0.182672131 | 3.04E-05 | 8.41E-05 |
| LOC100190938 | -0.15413866  | 0.000447 | 0.001012 |
| LOC100190939 | -0.164806157 | 0.000172 | 0.000422 |

|              |              |          |          |
|--------------|--------------|----------|----------|
| LOC100190940 | 0.205597154  | 2.54E-06 | 8.35E-06 |
| LOC100190986 | -0.316666189 | 1.85E-13 | 1.81E-12 |
| LOC100192378 | -0.010277096 | 0.816022 | 0.853314 |
| LOC100192379 | -0.040889405 | 0.354414 | 0.429023 |
| LOC100192426 | -0.044115    | 0.317706 | 0.390236 |
| LOC100216001 | 0.186153516  | 2.12E-05 | 6.05E-05 |
| LOC100216545 | -0.118604442 | 0.007049 | 0.012873 |
| LOC100233209 | -0.121677337 | 0.005695 | 0.010585 |
| LOC100240726 | -0.225134179 | 2.43E-07 | 9.40E-07 |
| LOC100240734 | 0.061126257  | 0.166022 | 0.222894 |
| LOC100240735 | -0.00705031  | 0.873188 | 0.901074 |
| LOC100268168 | -0.010279316 | 0.815983 | 0.853314 |
| LOC100270710 | 0.07580386   | 0.085695 | 0.123948 |
| LOC100270746 | -0.140478419 | 0.001393 | 0.002887 |
| LOC100270804 | -0.323969521 | 4.76E-14 | 5.06E-13 |
| LOC100271722 | -0.283780687 | 5.39E-11 | 3.60E-10 |
| LOC100271831 | -0.029956001 | 0.497575 | 0.570631 |
| LOC100271832 | -0.047083815 | 0.286199 | 0.357199 |
| LOC100271836 | -0.162334096 | 0.000216 | 0.00052  |
| LOC100272146 | -0.142960458 | 0.001141 | 0.002404 |
| LOC100272216 | -0.269451444 | 5.12E-10 | 2.97E-09 |
| LOC100272217 | -0.170728527 | 9.87E-05 | 0.000252 |
| LOC100272228 | -0.34370318  | 1.00E-15 | 1.38E-14 |
| LOC100286793 | 0.107662981  | 0.014508 | 0.024902 |
| LOC100286844 | -0.14355349  | 0.001088 | 0.002299 |
| LOC100287227 | -0.054353349 | 0.218178 | 0.282591 |
| LOC100287704 | -0.014041011 | 0.750574 | 0.798684 |
| LOC100287718 | -0.205609467 | 2.54E-06 | 8.34E-06 |
| LOC100288778 | -0.226090643 | 2.15E-07 | 8.40E-07 |
| LOC100289341 | -0.01635767  | 0.711131 | 0.765109 |
| LOC100302401 | 0.18380142   | 2.71E-05 | 7.56E-05 |
| LOC100302640 | -0.161264407 | 0.000238 | 0.000567 |
| LOC100302650 | -0.26605463  | 8.57E-10 | 4.81E-09 |
| LOC100303728 | -0.316040864 | 2.08E-13 | 2.01E-12 |
| LOC113230    | -0.210919789 | 1.37E-06 | 4.70E-06 |
| LOC115110    | -0.450891302 | 3.72E-27 | 2.81E-25 |
| LOC116437    | 0.14126519   | 0.001308 | 0.002725 |
| LOC121838    | -0.208502055 | 1.82E-06 | 6.12E-06 |
| LOC121952    | -0.35299713  | 1.47E-16 | 2.28E-15 |
| LOC126536    | -0.050340779 | 0.254136 | 0.322641 |
| LOC127841    | 0.163641121  | 0.000192 | 0.000465 |
| LOC134466    | -0.105133911 | 0.017001 | 0.028742 |
| LOC143188    | -0.201974369 | 3.84E-06 | 1.22E-05 |
| LOC143666    | -0.172484197 | 8.34E-05 | 0.000215 |

|           |              |          |          |
|-----------|--------------|----------|----------|
| LOC144438 | 0.212082258  | 1.19E-06 | 4.13E-06 |
| LOC144486 | -0.003476011 | 0.937278 | 0.950691 |
| LOC144571 | -0.237186452 | 5.11E-08 | 2.19E-07 |
| LOC144742 | 0.005056694  | 0.90886  | 0.928654 |
| LOC144776 | 0.102104141  | 0.020474 | 0.034047 |
| LOC145474 | -0.020582089 | 0.641218 | 0.702168 |
| LOC145783 | 0.153556516  | 0.00047  | 0.001059 |
| LOC145820 | -0.21464783  | 8.80E-07 | 3.12E-06 |
| LOC145837 | -0.025762794 | 0.559673 | 0.628999 |
| LOC145845 | -0.059074692 | 0.180724 | 0.239985 |
| LOC146336 | -0.018800326 | 0.670364 | 0.728299 |
| LOC146481 | 0.025564529  | 0.5627   | 0.631938 |
| LOC146880 | -0.399474112 | 3.75E-21 | 1.17E-19 |
| LOC147727 | -0.269939027 | 4.76E-10 | 2.77E-09 |
| LOC147804 | 0.110502172  | 0.012097 | 0.021087 |
| LOC148145 | -0.247202469 | 1.31E-08 | 6.15E-08 |
| LOC148189 | 0.026702848  | 0.545432 | 0.616042 |
| LOC148413 | -0.150638129 | 0.000604 | 0.001336 |
| LOC148696 | -0.388512476 | 5.31E-20 | 1.38E-18 |
| LOC148709 | 0.095482966  | 0.03027  | 0.048566 |
| LOC148824 | -0.012010343 | 0.785695 | 0.827857 |
| LOC149134 | -0.091203062 | 0.038545 | 0.060393 |
| LOC149620 | -0.386645808 | 8.26E-20 | 2.09E-18 |
| LOC149837 | -0.081580804 | 0.064321 | 0.095922 |
| LOC150185 | -0.016467743 | 0.709275 | 0.763517 |
| LOC150197 | -0.148967359 | 0.000696 | 0.001523 |
| LOC150381 | -0.003652453 | 0.934101 | 0.948388 |
| LOC150527 | 0.003460412  | 0.937559 | 0.950782 |
| LOC150568 | 0.009511286  | 0.829513 | 0.864323 |
| LOC150622 | -0.20613332  | 2.39E-06 | 7.88E-06 |
| LOC150776 | -0.247381656 | 1.28E-08 | 6.01E-08 |
| LOC150786 | 0.291735168  | 1.46E-11 | 1.07E-10 |
| LOC151009 | -0.246062125 | 1.53E-08 | 7.13E-08 |
| LOC151162 | -0.098149809 | 0.025924 | 0.042193 |
| LOC151174 | -0.121979469 | 0.005575 | 0.010385 |
| LOC151534 | -0.077292882 | 0.079703 | 0.116285 |
| LOC151658 | 0.039743542  | 0.368073 | 0.442715 |
| LOC152024 | 0.028711208  | 0.51562  | 0.58787  |
| LOC152217 | 0.182202125  | 3.19E-05 | 8.78E-05 |
| LOC152225 | 0.231080674  | 1.14E-07 | 4.65E-07 |
| LOC153328 | -0.065120349 | 0.14     | 0.191807 |
| LOC153684 | -0.356545243 | 6.97E-17 | 1.14E-15 |
| LOC153910 | 0.03552166   | 0.42116  | 0.495769 |
| LOC154449 | -0.007968459 | 0.856841 | 0.887156 |

|           |              |          |          |
|-----------|--------------|----------|----------|
| LOC154761 | 0.024629356  | 0.57708  | 0.644683 |
| LOC154822 | -0.060180101 | 0.172687 | 0.230772 |
| LOC157381 | -0.183871816 | 2.69E-05 | 7.51E-05 |
| LOC157627 | -0.005691844 | 0.897472 | 0.919913 |
| LOC158376 | -0.167515432 | 0.000134 | 0.000333 |
| LOC158572 | -0.245772082 | 1.60E-08 | 7.41E-08 |
| LOC158696 | -0.229858723 | 1.33E-07 | 5.38E-07 |
| LOC162632 | -0.133902986 | 0.002326 | 0.004635 |
| LOC168474 | -0.211250194 | 1.32E-06 | 4.53E-06 |
| LOC200030 | -0.29526324  | 8.07E-12 | 6.13E-11 |
| LOC200726 | -0.010121632 | 0.818757 | 0.85539  |
| LOC201651 | -0.024549447 | 0.578316 | 0.645632 |
| LOC202181 | -0.4368295   | 2.07E-25 | 1.23E-23 |
| LOC202781 | -0.15607944  | 0.000378 | 0.000864 |
| LOC219347 | -0.061102906 | 0.166184 | 0.223037 |
| LOC220429 | 0.207528721  | 2.03E-06 | 6.79E-06 |
| LOC220594 | -0.116223085 | 0.008289 | 0.014941 |
| LOC220729 | -0.067851074 | 0.124093 | 0.172213 |
| LOC220930 | -0.005489784 | 0.901093 | 0.922671 |
| LOC221122 | -0.09204077  | 0.036789 | 0.057875 |
| LOC221442 | -0.283704673 | 5.46E-11 | 3.64E-10 |
| LOC221710 | 0.374959265  | 1.23E-18 | 2.64E-17 |
| LOC222699 | 0.117398102  | 0.007655 | 0.013891 |
| LOC253039 | -0.265079657 | 9.92E-10 | 5.53E-09 |
| LOC253724 | -0.023395854 | 0.596307 | 0.662202 |
| LOC254312 | -0.076813151 | 0.081595 | 0.118647 |
| LOC254559 | -0.047798236 | 0.278943 | 0.349452 |
| LOC255025 | 0.02348887   | 0.594847 | 0.660838 |
| LOC255167 | -0.185339049 | 2.31E-05 | 6.52E-05 |
| LOC256880 | -0.1470251   | 0.000818 | 0.001767 |
| LOC257358 | -0.120809232 | 0.006051 | 0.011186 |
| LOC25845  | -0.031258602 | 0.479057 | 0.552924 |
| LOC26102  | -0.157710206 | 0.000327 | 0.000758 |
| LOC282997 | -0.147309541 | 0.000799 | 0.001729 |
| LOC283050 | -0.288471905 | 2.51E-11 | 1.76E-10 |
| LOC283070 | -0.414257762 | 8.97E-23 | 3.53E-21 |
| LOC283174 | -0.419443529 | 2.31E-23 | 1.00E-21 |
| LOC283267 | -0.097016394 | 0.027701 | 0.044807 |
| LOC283314 | -0.234559495 | 7.23E-08 | 3.04E-07 |
| LOC283332 | -0.033165963 | 0.452633 | 0.52692  |
| LOC283392 | -0.038259734 | 0.386238 | 0.461014 |
| LOC283404 | 0.206141736  | 2.39E-06 | 7.88E-06 |
| LOC283663 | -0.306621279 | 1.13E-12 | 9.83E-12 |
| LOC283731 | -0.216267814 | 7.24E-07 | 2.60E-06 |

|           |              |          |          |
|-----------|--------------|----------|----------|
| LOC283761 | -0.062918696 | 0.153927 | 0.208474 |
| LOC283856 | -0.253407748 | 5.47E-09 | 2.71E-08 |
| LOC283867 | -0.105602849 | 0.016512 | 0.027987 |
| LOC283914 | -0.077684375 | 0.078185 | 0.114278 |
| LOC283922 | -0.335391655 | 5.27E-15 | 6.52E-14 |
| LOC283999 | -0.051392348 | 0.244338 | 0.311746 |
| LOC284009 | -0.139426964 | 0.001514 | 0.00312  |
| LOC284023 | -0.205430079 | 2.59E-06 | 8.49E-06 |
| LOC284100 | -0.053579889 | 0.224809 | 0.290052 |
| LOC284232 | 0.038171263  | 0.387339 | 0.462134 |
| LOC284233 | -0.254022145 | 5.01E-09 | 2.50E-08 |
| LOC284276 | -0.271354231 | 3.83E-10 | 2.26E-09 |
| LOC284379 | -0.008376616 | 0.849594 | 0.881158 |
| LOC284440 | -0.464862236 | 5.68E-29 | 5.33E-27 |
| LOC284441 | 0.10703857   | 0.015092 | 0.025822 |
| LOC284551 | -0.052463165 | 0.234635 | 0.301097 |
| LOC284578 | -0.328151003 | 2.15E-14 | 2.41E-13 |
| LOC284632 | -0.105920649 | 0.016188 | 0.027484 |
| LOC284661 | -0.063522667 | 0.150006 | 0.203857 |
| LOC284688 | 0.101165754  | 0.021668 | 0.035859 |
| LOC284749 | -0.245561888 | 1.64E-08 | 7.61E-08 |
| LOC284788 | -0.003435065 | 0.938015 | 0.951052 |
| LOC284798 | -0.078296188 | 0.07586  | 0.111328 |
| LOC284837 | -0.401108138 | 2.51E-21 | 8.05E-20 |
| LOC284900 | -0.340738588 | 1.82E-15 | 2.43E-14 |
| LOC285033 | -0.051602202 | 0.242414 | 0.309668 |
| LOC285045 | -0.059598226 | 0.176884 | 0.235782 |
| LOC285074 | -0.035687053 | 0.419    | 0.493691 |
| LOC285194 | -0.024290103 | 0.582339 | 0.649288 |
| LOC285205 | -0.052246418 | 0.236576 | 0.303238 |
| LOC285359 | -0.164564675 | 0.000176 | 0.000431 |
| LOC285370 | -0.016840976 | 0.702995 | 0.758227 |
| LOC285375 | -0.003857354 | 0.930413 | 0.945599 |
| LOC285401 | 0.047597536  | 0.280968 | 0.351615 |
| LOC285419 | -0.23531979  | 6.54E-08 | 2.77E-07 |
| LOC285456 | -0.128958859 | 0.003371 | 0.006521 |
| LOC285501 | 0.111281071  | 0.011501 | 0.020159 |
| LOC285548 | 0.080336005  | 0.068511 | 0.10155  |
| LOC285593 | -0.317710628 | 1.53E-13 | 1.51E-12 |
| LOC285627 | -0.032402749 | 0.463106 | 0.537042 |
| LOC285629 | -0.138958413 | 0.001571 | 0.003224 |
| LOC285692 | -0.028890804 | 0.512996 | 0.585294 |
| LOC285696 | 0.163926142  | 0.000187 | 0.000454 |
| LOC285733 | 0.060190166  | 0.172615 | 0.230692 |

|           |              |          |          |
|-----------|--------------|----------|----------|
| LOC285735 | -0.098773219 | 0.02499  | 0.040795 |
| LOC285740 | -0.076583543 | 0.082514 | 0.11986  |
| LOC285768 | -0.19431866  | 8.93E-06 | 2.69E-05 |
| LOC285780 | -0.124508164 | 0.004659 | 0.008803 |
| LOC285796 | -0.174037254 | 7.18E-05 | 0.000187 |
| LOC285830 | -0.229910647 | 1.32E-07 | 5.35E-07 |
| LOC285847 | -0.101994331 | 0.020611 | 0.03426  |
| LOC285954 | 0.005948339  | 0.892879 | 0.916169 |
| LOC286002 | 0.089194161  | 0.043047 | 0.066762 |
| LOC286094 | -0.031867312 | 0.470534 | 0.544241 |
| LOC286135 | 0.021272172  | 0.630073 | 0.692011 |
| LOC286238 | 0.068536648  | 0.12033  | 0.167653 |
| LOC286359 | 0.029537032  | 0.503611 | 0.576264 |
| LOC286367 | -0.358299518 | 4.80E-17 | 8.04E-16 |
| LOC286467 | 0.24747563   | 1.26E-08 | 5.94E-08 |
| LOC29034  | 0.247704275  | 1.22E-08 | 5.77E-08 |
| LOC338588 | 0.057131247  | 0.19552  | 0.256906 |
| LOC338651 | -0.165178982 | 0.000166 | 0.000408 |
| LOC338758 | -0.188397423 | 1.68E-05 | 4.86E-05 |
| LOC338799 | -0.243795507 | 2.10E-08 | 9.55E-08 |
| LOC339047 | -0.36720796  | 6.94E-18 | 1.33E-16 |
| LOC339240 | -0.102139934 | 0.02043  | 0.033981 |
| LOC339290 | -0.25548221  | 4.06E-09 | 2.05E-08 |
| LOC339524 | -0.277782356 | 1.41E-10 | 8.86E-10 |
| LOC339535 | 0.078710696  | 0.074317 | 0.109199 |
| LOC339568 | 0.097310563  | 0.02723  | 0.04411  |
| LOC339674 | 0.19163665   | 1.19E-05 | 3.53E-05 |
| LOC339788 | -0.108351335 | 0.013888 | 0.023928 |
| LOC340017 | -0.00165299  | 0.970149 | 0.977583 |
| LOC340074 | -0.006902407 | 0.875827 | 0.903072 |
| LOC340357 | -0.144311159 | 0.001023 | 0.002173 |
| LOC340508 | -0.202359797 | 3.67E-06 | 1.18E-05 |
| LOC341056 | 0.134742108  | 0.002182 | 0.004371 |
| LOC342346 | -0.345952737 | 6.33E-16 | 9.01E-15 |
| LOC344595 | -0.160846082 | 0.000247 | 0.000587 |
| LOC344967 | 0.040158749  | 0.363087 | 0.437613 |
| LOC347376 | 0.041663479  | 0.34537  | 0.4196   |
| LOC348021 | 0.033062246  | 0.454048 | 0.528076 |
| LOC348840 | -0.065750257 | 0.136199 | 0.187244 |
| LOC348926 | 0.025373321  | 0.565626 | 0.634484 |
| LOC349114 | -0.261586261 | 1.67E-09 | 8.93E-09 |
| LOC349196 | -0.280205427 | 9.57E-11 | 6.18E-10 |
| LOC360030 | 0.035022915  | 0.427715 | 0.50236  |
| LOC374443 | -0.000869795 | 0.98429  | 0.9883   |

|           |              |          |          |
|-----------|--------------|----------|----------|
| LOC374491 | -0.029271918 | 0.50745  | 0.580026 |
| LOC375190 | -0.177771493 | 4.97E-05 | 0.000133 |
| LOC387646 | 0.039098978  | 0.375898 | 0.450717 |
| LOC387647 | 0.024601685  | 0.577508 | 0.644981 |
| LOC388152 | -0.359312566 | 3.86E-17 | 6.59E-16 |
| LOC388242 | 0.003825921  | 0.930979 | 0.945955 |
| LOC388387 | -0.260841758 | 1.86E-09 | 9.89E-09 |
| LOC388428 | -0.014141159 | 0.748854 | 0.797193 |
| LOC388588 | -0.234122863 | 7.66E-08 | 3.20E-07 |
| LOC388692 | -0.127849752 | 0.003658 | 0.007025 |
| LOC388789 | 0.1312558    | 0.002842 | 0.005573 |
| LOC388796 | 0.159198737  | 0.000287 | 0.000672 |
| LOC388946 | 0.026776717  | 0.54432  | 0.614995 |
| LOC388955 | 0.130436273  | 0.003021 | 0.005897 |
| LOC389033 | -0.167072886 | 0.000139 | 0.000347 |
| LOC389332 | -0.029101538 | 0.509925 | 0.582322 |
| LOC389333 | 0.03640971   | 0.409637 | 0.484371 |
| LOC389458 | -0.029985756 | 0.497148 | 0.570207 |
| LOC389493 | -0.075018221 | 0.089    | 0.128175 |
| LOC389634 | -0.216185371 | 7.32E-07 | 2.62E-06 |
| LOC389705 | -0.129977528 | 0.003126 | 0.006085 |
| LOC389791 | -0.120657859 | 0.006115 | 0.011296 |
| LOC390595 | -0.280013804 | 9.87E-11 | 6.37E-10 |
| LOC390858 | -0.022457008 | 0.611133 | 0.675403 |
| LOC391322 | -0.168420261 | 0.000123 | 0.000308 |
| LOC392196 | -0.01687802  | 0.702373 | 0.757719 |
| LOC399744 | -0.22567241  | 2.27E-07 | 8.83E-07 |
| LOC399815 | 0.307577037  | 9.55E-13 | 8.39E-12 |
| LOC399959 | 0.061566515  | 0.162987 | 0.219232 |
| LOC400027 | -0.295844926 | 7.31E-12 | 5.59E-11 |
| LOC400043 | -0.021551217 | 0.62559  | 0.688297 |
| LOC400657 | -0.195814951 | 7.59E-06 | 2.31E-05 |
| LOC400696 | 0.030039728  | 0.496373 | 0.56958  |
| LOC400752 | -0.28490361  | 4.49E-11 | 3.04E-10 |
| LOC400759 | -0.033253408 | 0.451441 | 0.525778 |
| LOC400794 | -0.327354488 | 2.50E-14 | 2.78E-13 |
| LOC400804 | -0.15247042  | 0.000517 | 0.001155 |
| LOC400891 | -0.283749771 | 5.42E-11 | 3.62E-10 |
| LOC400927 | -0.261633573 | 1.66E-09 | 8.88E-09 |
| LOC400931 | -0.273182409 | 2.89E-10 | 1.73E-09 |
| LOC400940 | -0.117601663 | 0.007549 | 0.013715 |
| LOC401010 | 0.187623099  | 1.82E-05 | 5.25E-05 |
| LOC401052 | -0.14043488  | 0.001398 | 0.002896 |
| LOC401093 | -0.356600698 | 6.89E-17 | 1.13E-15 |

|           |              |          |          |
|-----------|--------------|----------|----------|
| LOC401127 | -0.120949472 | 0.005992 | 0.011089 |
| LOC401387 | -0.098250752 | 0.025771 | 0.041971 |
| LOC401397 | 0.04064285   | 0.357326 | 0.43179  |
| LOC401431 | -0.168113906 | 0.000127 | 0.000317 |
| LOC401463 | -0.210490307 | 1.44E-06 | 4.93E-06 |
| LOC401588 | -0.117100677 | 0.007811 | 0.014153 |
| LOC402377 | 0.093095726  | 0.034675 | 0.054854 |
| LOC402644 | 0.024576616  | 0.577896 | 0.64527  |
| LOC407835 | 0.164854263  | 0.000171 | 0.00042  |
| LOC415056 | -0.071000273 | 0.107536 | 0.151656 |
| LOC440040 | -0.011687039 | 0.791329 | 0.832609 |
| LOC440173 | 0.095184596  | 0.030793 | 0.049286 |
| LOC440354 | -0.091184052 | 0.038586 | 0.060443 |
| LOC440356 | 0.068075109  | 0.122853 | 0.170812 |
| LOC440461 | -0.200560403 | 4.50E-06 | 1.42E-05 |
| LOC440563 | 0.104866112  | 0.017286 | 0.029161 |
| LOC440896 | -0.291542551 | 1.51E-11 | 1.10E-10 |
| LOC440905 | 0.069120064  | 0.117197 | 0.16378  |
| LOC440925 | -0.045550237 | 0.302202 | 0.373857 |
| LOC440944 | -0.198980201 | 5.36E-06 | 1.67E-05 |
| LOC440957 | -0.063371664 | 0.150979 | 0.205012 |
| LOC441046 | -0.066601947 | 0.131186 | 0.181025 |
| LOC441089 | 0.315167068  | 2.44E-13 | 2.34E-12 |
| LOC441177 | 0.276969356  | 1.60E-10 | 9.96E-10 |
| LOC441204 | -0.306189132 | 1.22E-12 | 1.05E-11 |
| LOC441208 | 0.098326454  | 0.025657 | 0.041792 |
| LOC441294 | -0.044544791 | 0.31301  | 0.385083 |
| LOC441454 | -0.137569301 | 0.001753 | 0.003566 |
| LOC441455 | -0.042398192 | 0.336923 | 0.410871 |
| LOC441601 | 0.038172139  | 0.387328 | 0.462134 |
| LOC441666 | 0.123561757  | 0.004985 | 0.009368 |
| LOC441869 | -0.323186835 | 5.51E-14 | 5.79E-13 |
| LOC442308 | 0.182269234  | 3.17E-05 | 8.73E-05 |
| LOC442421 | -0.034828377 | 0.430287 | 0.504996 |
| LOC442454 | 0.259183008  | 2.38E-09 | 1.24E-08 |
| LOC442459 | 0.096691309  | 0.028229 | 0.045588 |
| LOC493754 | -0.082999451 | 0.059805 | 0.089865 |
| LOC494141 | 0.059413295  | 0.178233 | 0.237248 |
| LOC541471 | 0.331358173  | 1.16E-14 | 1.35E-13 |
| LOC541473 | -0.242202074 | 2.60E-08 | 1.17E-07 |
| LOC550112 | 0.094779656  | 0.031515 | 0.050341 |
| LOC550643 | 0.150633763  | 0.000604 | 0.001336 |
| LOC554202 | 0.187592623  | 1.83E-05 | 5.26E-05 |
| LOC55908  | -0.074223151 | 0.092449 | 0.132492 |



|           |              |          |          |
|-----------|--------------|----------|----------|
| LOC572558 | -0.230019138 | 1.30E-07 | 5.28E-07 |
| LOC595101 | -0.073131859 | 0.097355 | 0.138886 |
| LOC606724 | -0.19168549  | 1.19E-05 | 3.52E-05 |
| LOC613037 | -0.085385058 | 0.052803 | 0.080335 |
| LOC619207 | -0.250495015 | 8.27E-09 | 4.00E-08 |
| LOC641298 | -0.148658355 | 0.000714 | 0.00156  |
| LOC641367 | 0.017645147  | 0.689532 | 0.745961 |
| LOC642587 | -0.075809049 | 0.085674 | 0.123929 |
| LOC642597 | -0.023373839 | 0.596653 | 0.66247  |
| LOC642826 | -0.205667138 | 2.52E-06 | 8.29E-06 |
| LOC642846 | 0.060017973  | 0.173849 | 0.232139 |
| LOC642852 | -0.089648527 | 0.041992 | 0.065297 |
| LOC642929 | 0.023019463  | 0.602231 | 0.667373 |
| LOC643008 | -0.242334602 | 2.56E-08 | 1.15E-07 |
| LOC643387 | 0.001273317  | 0.977003 | 0.983027 |
| LOC643486 | 0.14327024   | 0.001113 | 0.002349 |
| LOC643677 | -0.103037645 | 0.019344 | 0.032328 |
| LOC643719 | -0.262131835 | 1.54E-09 | 8.31E-09 |
| LOC643763 | 0.086452058  | 0.049901 | 0.076395 |
| LOC643837 | -0.070151447 | 0.111817 | 0.157051 |
| LOC643923 | -0.019398225 | 0.660526 | 0.719487 |
| LOC643955 | 0.088408919  | 0.044923 | 0.069419 |
| LOC644145 | 0.11978438   | 0.006498 | 0.011945 |
| LOC644165 | -0.41249422  | 1.41E-22 | 5.35E-21 |
| LOC644172 | -0.191527107 | 1.21E-05 | 3.57E-05 |
| LOC644538 | -0.040782596 | 0.355674 | 0.430183 |
| LOC644669 | -0.026740133 | 0.544871 | 0.615512 |
| LOC644936 | 0.010159718  | 0.818087 | 0.854824 |
| LOC645166 | 0.318279919  | 1.38E-13 | 1.37E-12 |
| LOC645323 | -0.130621174 | 0.00298  | 0.005822 |
| LOC645332 | -0.091677881 | 0.037541 | 0.058941 |
| LOC645431 | -0.119573689 | 0.006593 | 0.012108 |
| LOC645676 | -0.16621459  | 0.000151 | 0.000373 |
| LOC645752 | -0.12163648  | 0.005711 | 0.010611 |
| LOC646214 | 0.047503542  | 0.281921 | 0.352608 |
| LOC646471 | -0.329559339 | 1.64E-14 | 1.88E-13 |
| LOC646498 | -0.080495262 | 0.067963 | 0.10082  |
| LOC646627 | 0.051086581  | 0.247159 | 0.314924 |
| LOC646762 | -0.120844972 | 0.006036 | 0.011163 |
| LOC646813 | 0.055838654  | 0.20584  | 0.268769 |
| LOC646851 | -0.241895331 | 2.71E-08 | 1.22E-07 |
| LOC646982 | -0.157923415 | 0.000321 | 0.000745 |
| LOC646999 | 0.107992427  | 0.014208 | 0.024445 |
| LOC647121 | -0.253451779 | 5.44E-09 | 2.70E-08 |

|           |              |          |          |
|-----------|--------------|----------|----------|
| LOC647288 | 0.15896269   | 0.000293 | 0.000685 |
| LOC647309 | -0.034076229 | 0.440317 | 0.514652 |
| LOC647859 | -0.056161831 | 0.203223 | 0.265839 |
| LOC647946 | 0.290599836  | 1.76E-11 | 1.27E-10 |
| LOC647979 | -0.126529456 | 0.004027 | 0.007686 |
| LOC648691 | 0.164303096  | 0.00018  | 0.00044  |
| LOC648740 | -0.442285275 | 4.46E-26 | 2.91E-24 |
| LOC649330 | 0.303032018  | 2.12E-12 | 1.76E-11 |
| LOC650293 | 0.02212892   | 0.616353 | 0.679967 |
| LOC650368 | -0.132073187 | 0.002672 | 0.005269 |
| LOC650623 | -0.200280641 | 4.64E-06 | 1.46E-05 |
| LOC651250 | -0.303874605 | 1.83E-12 | 1.54E-11 |
| LOC652276 | -0.021359256 | 0.628673 | 0.69108  |
| LOC653113 | -0.133466943 | 0.002405 | 0.004781 |
| LOC653501 | -0.364440013 | 1.27E-17 | 2.33E-16 |
| LOC653544 | -0.051602941 | 0.242407 | 0.309668 |
| LOC653566 | 0.248773177  | 1.05E-08 | 5.02E-08 |
| LOC653653 | -0.069226933 | 0.116631 | 0.163102 |
| LOC653786 | -0.161582175 | 0.000231 | 0.000553 |
| LOC654342 | 0.203741395  | 3.14E-06 | 1.02E-05 |
| LOC654433 | -0.004935476 | 0.911036 | 0.930447 |
| LOC678655 | -0.109318936 | 0.013055 | 0.022619 |
| LOC723809 | -0.401593442 | 2.22E-21 | 7.20E-20 |
| LOC723972 | 0.136057694  | 0.001971 | 0.00398  |
| LOC727677 | -0.035679706 | 0.419096 | 0.493745 |
| LOC727896 | 0.275232021  | 2.10E-10 | 1.29E-09 |
| LOC727924 | 0.006326986  | 0.886105 | 0.910602 |
| LOC728024 | -0.030560663 | 0.488932 | 0.562171 |
| LOC728190 | 0.054305698  | 0.218583 | 0.283048 |
| LOC728264 | -0.290869294 | 1.69E-11 | 1.22E-10 |
| LOC728276 | -0.083609841 | 0.057944 | 0.087312 |
| LOC728323 | -0.062299147 | 0.15803  | 0.213382 |
| LOC728392 | -0.424397681 | 6.21E-24 | 2.95E-22 |
| LOC728554 | 0.219149093  | 5.10E-07 | 1.88E-06 |
| LOC728606 | -0.051181241 | 0.246283 | 0.313959 |
| LOC728613 | -0.012899546 | 0.770257 | 0.815245 |
| LOC728640 | 0.089888555  | 0.041443 | 0.06455  |
| LOC728643 | 0.15749277   | 0.000333 | 0.000771 |
| LOC728723 | -0.149813842 | 0.000648 | 0.001425 |
| LOC728743 | -0.141224626 | 0.001313 | 0.002733 |
| LOC728758 | 0.156676573  | 0.000358 | 0.000824 |
| LOC728819 | 0.038699615  | 0.380797 | 0.45535  |
| LOC728855 | 0.093428896  | 0.034029 | 0.053935 |
| LOC728875 | 0.145412812  | 0.000935 | 0.001997 |

|                 |              |          |          |
|-----------------|--------------|----------|----------|
| LOC728989       | -0.312325497 | 4.08E-13 | 3.79E-12 |
| LOC729020       | 0.306337436  | 1.19E-12 | 1.03E-11 |
| LOC729082       | 0.190627715  | 1.33E-05 | 3.90E-05 |
| LOC729156       | -0.03501506  | 0.427818 | 0.502452 |
| LOC729176       | 0.234429821  | 7.35E-08 | 3.09E-07 |
| LOC729234       | -0.317004147 | 1.74E-13 | 1.70E-12 |
| LOC729375       | -0.098902687 | 0.0248   | 0.040511 |
| LOC729467       | 0.056914656  | 0.197222 | 0.258887 |
| LOC729603       | -0.254900495 | 4.42E-09 | 2.22E-08 |
| LOC729609       | -0.115961956 | 0.008436 | 0.015176 |
| LOC729668       | 0.026374478  | 0.550386 | 0.62062  |
| LOC729678       | -0.151097217 | 0.000581 | 0.001287 |
| LOC729799       | -0.29654522  | 6.49E-12 | 4.99E-11 |
| LOC729991-MEF2B | -0.054436482 | 0.217474 | 0.281788 |
| LOC729991       | -0.060335627 | 0.171578 | 0.229428 |
| LOC730101       | 0.056925839  | 0.197134 | 0.258806 |
| LOC730668       | -0.152909882 | 0.000497 | 0.001115 |
| LOC731779       | -0.008161179 | 0.853418 | 0.884206 |
| LOC731789       | 0.094562354  | 0.031908 | 0.05088  |
| LOC732275       | -0.002283682 | 0.958768 | 0.96841  |
| LOC80054        | -0.345174431 | 7.42E-16 | 1.04E-14 |
| LOC80154        | -0.394207022 | 1.36E-20 | 3.83E-19 |
| LOC81691        | 0.119898882  | 0.006447 | 0.011857 |
| LOC84740        | -0.081887504 | 0.063322 | 0.094608 |
| LOC84856        | -0.041862566 | 0.343068 | 0.417133 |
| LOC84931        | 0.011776334  | 0.789771 | 0.831321 |
| LOC84989        | -0.024159713 | 0.584366 | 0.651111 |
| LOC90110        | -0.337444542 | 3.51E-15 | 4.48E-14 |
| LOC90246        | -0.095526935 | 0.030194 | 0.048459 |
| LOC90586        | -0.221420345 | 3.86E-07 | 1.45E-06 |
| LOC90784        | -0.089088325 | 0.043296 | 0.067088 |
| LOC90834        | -0.348630455 | 3.65E-16 | 5.40E-15 |
| LOC91149        | 0.038763335  | 0.380013 | 0.454723 |
| LOC91316        | -0.374324637 | 1.42E-18 | 3.02E-17 |
| LOC91450        | -0.278011924 | 1.36E-10 | 8.56E-10 |
| LOC91948        | -0.028181239 | 0.523404 | 0.595402 |
| LOC92249        | -0.240106174 | 3.46E-08 | 1.52E-07 |
| LOC92659        | 0.118797132  | 0.006956 | 0.012717 |
| LOC92973        | -0.505502543 | 9.31E-35 | 2.55E-32 |
| LOC93432        | -0.044508808 | 0.313401 | 0.385517 |
| LOC93622        | -0.031723061 | 0.472546 | 0.546331 |
| LOC96610        | 0.039853245  | 0.366751 | 0.441445 |
| LOH12CR1        | 0.246521497  | 1.44E-08 | 6.73E-08 |
| LOH12CR2        | -0.061892502 | 0.160767 | 0.216625 |

|          |              |          |          |
|----------|--------------|----------|----------|
| LOH3CR2A | -0.191182184 | 1.25E-05 | 3.69E-05 |
| LONP1    | 0.051624612  | 0.242209 | 0.309446 |
| LONP2    | -0.035280044 | 0.424328 | 0.498969 |
| LONRF1   | -0.162414227 | 0.000214 | 0.000516 |
| LONRF2   | -0.23209522  | 9.97E-08 | 4.10E-07 |
| LONRF3   | -0.016575227 | 0.707464 | 0.761979 |
| LOR      | -0.280601365 | 8.99E-11 | 5.83E-10 |
| LOXHD1   | -0.17093356  | 9.68E-05 | 0.000247 |
| LOXL1    | -0.106999434 | 0.015129 | 0.025874 |
| LOXL2    | 0.281926899  | 7.27E-11 | 4.77E-10 |
| LOXL3    | -0.119593849 | 0.006584 | 0.012094 |
| LOXL4    | -0.294516925 | 9.15E-12 | 6.90E-11 |
| LOX      | 0.208073434  | 1.91E-06 | 6.41E-06 |
| LPAL2    | -0.185616139 | 2.25E-05 | 6.35E-05 |
| LPAR1    | 0.128223316  | 0.003559 | 0.006852 |
| LPAR2    | -0.095527035 | 0.030193 | 0.048459 |
| LPAR3    | -0.130699058 | 0.002963 | 0.005792 |
| LPAR4    | 0.117844464  | 0.007425 | 0.01351  |
| LPAR5    | -0.094839    | 0.031408 | 0.050191 |
| LPAR6    | -0.172130795 | 8.63E-05 | 0.000222 |
| LPA      | -0.15641871  | 0.000367 | 0.000841 |
| LPCAT1   | -0.235936436 | 6.03E-08 | 2.56E-07 |
| LPCAT2   | -0.290264803 | 1.86E-11 | 1.34E-10 |
| LPCAT3   | -0.188100259 | 1.73E-05 | 5.01E-05 |
| LPCAT4   | 0.039625488  | 0.369499 | 0.44427  |
| LPGAT1   | 0.231256239  | 1.11E-07 | 4.55E-07 |
| LPHN1    | -0.252818022 | 5.95E-09 | 2.94E-08 |
| LPHN2    | -0.074850634 | 0.089718 | 0.129079 |
| LPHN3    | -0.077606997 | 0.078483 | 0.114664 |
| LPIN1    | -0.244052577 | 2.02E-08 | 9.25E-08 |
| LPIN2    | -0.163199607 | 0.0002   | 0.000483 |
| LPIN3    | -0.260353324 | 2.00E-09 | 1.06E-08 |
| LPL      | -0.240839792 | 3.13E-08 | 1.39E-07 |
| LPO      | -0.027239299 | 0.537386 | 0.608192 |
| LPPR1    | -0.207505745 | 2.04E-06 | 6.80E-06 |
| LPPR2    | -0.230235409 | 1.27E-07 | 5.15E-07 |
| LPPR3    | -0.111375618 | 0.011431 | 0.020049 |
| LPPR4    | -0.337631899 | 3.38E-15 | 4.33E-14 |
| LPPR5    | -0.109873213 | 0.012599 | 0.021878 |
| LPP      | 0.083050242  | 0.059648 | 0.089643 |
| LPXN     | -0.208862947 | 1.74E-06 | 5.88E-06 |
| LQK1     | -0.024445862 | 0.579921 | 0.646954 |
| LRAT     | -0.191530316 | 1.21E-05 | 3.57E-05 |
| LRBA     | -0.078207188 | 0.076194 | 0.11177  |

|         |              |          |          |
|---------|--------------|----------|----------|
| LRCH1   | -0.10230238  | 0.020229 | 0.03367  |
| LRCH2   | -0.106631326 | 0.015483 | 0.026401 |
| LRCH3   | -0.021077736 | 0.633205 | 0.694801 |
| LRCH4   | -0.366096062 | 8.87E-18 | 1.68E-16 |
| LRDD    | -0.247272239 | 1.30E-08 | 6.10E-08 |
| LRFN1   | -0.114341783 | 0.009403 | 0.016776 |
| LRFN2   | -0.036271136 | 0.411422 | 0.486138 |
| LRFN3   | -0.096560448 | 0.028444 | 0.045902 |
| LRFN4   | 0.226311259  | 2.09E-07 | 8.20E-07 |
| LRFN5   | -0.089982454 | 0.04123  | 0.064248 |
| LRG1    | -0.088647944 | 0.044345 | 0.068605 |
| LRGUK   | -0.229664674 | 1.37E-07 | 5.51E-07 |
| LRIG1   | -0.32553282  | 3.54E-14 | 3.85E-13 |
| LRIG2   | -0.193643376 | 9.61E-06 | 2.89E-05 |
| LRIG3   | -0.331046737 | 1.23E-14 | 1.43E-13 |
| LRIT1   | 0.131376575  | 0.002816 | 0.005526 |
| LRIT2   | -0.081637957 | 0.064134 | 0.0957   |
| LRIT3   | -0.31027633  | 5.90E-13 | 5.36E-12 |
| LRMP    | -0.247351853 | 1.28E-08 | 6.03E-08 |
| LRP10   | 0.062930512  | 0.15385  | 0.208403 |
| LRP11   | 0.118911394  | 0.006901 | 0.012628 |
| LRP12   | 0.231937295  | 1.02E-07 | 4.19E-07 |
| LRP1B   | 0.072304755  | 0.10121  | 0.143821 |
| LRP1    | -0.240226632 | 3.40E-08 | 1.50E-07 |
| LRP2BP  | -0.463814523 | 7.83E-29 | 7.25E-27 |
| LRP2    | -0.190015237 | 1.42E-05 | 4.15E-05 |
| LRP3    | -0.204219169 | 2.97E-06 | 9.66E-06 |
| LRP4    | 0.0450522    | 0.307524 | 0.379408 |
| LRP5L   | -0.296409485 | 6.64E-12 | 5.11E-11 |
| LRP5    | 0.019791275  | 0.65409  | 0.71376  |
| LRP6    | -0.146897557 | 0.000827 | 0.001784 |
| LRP8    | 0.203266769  | 3.31E-06 | 1.07E-05 |
| LRPAP1  | -0.108808667 | 0.013489 | 0.02329  |
| LRPPRC  | 0.364413132  | 1.28E-17 | 2.35E-16 |
| LRRC10B | -0.119602746 | 0.00658  | 0.012088 |
| LRRC10  | -0.001097731 | 0.980174 | 0.98531  |
| LRRC14B | 0.018846734  | 0.669599 | 0.727585 |
| LRRC14  | -0.074399346 | 0.091675 | 0.131544 |
| LRRC15  | 0.082489755  | 0.061396 | 0.092069 |
| LRRC16A | 0.045289014  | 0.304986 | 0.376742 |
| LRRC16B | -0.138729848 | 0.0016   | 0.003278 |
| LRRC17  | -0.109769851 | 0.012683 | 0.022009 |
| LRRC18  | -0.254123961 | 4.94E-09 | 2.46E-08 |
| LRRC19  | -0.033199664 | 0.452173 | 0.526519 |

|          |              |          |          |
|----------|--------------|----------|----------|
| LRRC1    | 0.213104589  | 1.06E-06 | 3.70E-06 |
| LRRC20   | -0.073462834 | 0.095846 | 0.136899 |
| LRRC23   | -0.168708975 | 0.00012  | 0.000301 |
| LRRC24   | -0.06811226  | 0.122649 | 0.170599 |
| LRRC25   | -0.122418435 | 0.005405 | 0.010094 |
| LRRC26   | 0.022309834  | 0.613472 | 0.677351 |
| LRRC27   | -0.299690458 | 3.79E-12 | 3.01E-11 |
| LRRC28   | 0.132750464  | 0.002539 | 0.005025 |
| LRRC29   | -0.264413066 | 1.10E-09 | 6.06E-09 |
| LRRC2    | -0.17777035  | 4.97E-05 | 0.000133 |
| LRRC31   | -0.286768342 | 3.32E-11 | 2.29E-10 |
| LRRC32   | -0.105637979 | 0.016476 | 0.027935 |
| LRRC33   | -0.263247628 | 1.30E-09 | 7.10E-09 |
| LRRC34   | -0.027480716 | 0.533785 | 0.605075 |
| LRRC36   | -0.422983799 | 9.06E-24 | 4.15E-22 |
| LRRC37A2 | -0.27690851  | 1.61E-10 | 1.01E-09 |
| LRRC37A3 | -0.101162791 | 0.021672 | 0.035863 |
| LRRC37A4 | -0.315379608 | 2.34E-13 | 2.26E-12 |
| LRRC37A  | -0.317884509 | 1.48E-13 | 1.47E-12 |
| LRRC37B2 | 0.03769362   | 0.39331  | 0.468197 |
| LRRC37B  | -0.314437257 | 2.78E-13 | 2.64E-12 |
| LRRC39   | -0.27303094  | 2.96E-10 | 1.77E-09 |
| LRRC3B   | -0.129152943 | 0.003323 | 0.00644  |
| LRRC3    | -0.244716305 | 1.85E-08 | 8.49E-08 |
| LRRC40   | 0.305694092  | 1.33E-12 | 1.14E-11 |
| LRRC41   | -0.063775886 | 0.148385 | 0.201873 |
| LRRC42   | 0.359761428  | 3.51E-17 | 6.04E-16 |
| LRRC43   | -0.127609911 | 0.003723 | 0.007143 |
| LRRC45   | -0.063954342 | 0.14725  | 0.200534 |
| LRRC46   | -0.204598805 | 2.85E-06 | 9.28E-06 |
| LRRC47   | -0.072460628 | 0.100475 | 0.142888 |
| LRRC48   | -0.309244318 | 7.10E-13 | 6.37E-12 |
| LRRC49   | -0.124405973 | 0.004693 | 0.008865 |
| LRRC4B   | -0.313263357 | 3.45E-13 | 3.24E-12 |
| LRRC4C   | -0.205501779 | 2.57E-06 | 8.43E-06 |
| LRRC4    | -0.258101157 | 2.78E-09 | 1.43E-08 |
| LRRC50   | -0.241039343 | 3.05E-08 | 1.35E-07 |
| LRRC52   | -0.25569365  | 3.94E-09 | 1.99E-08 |
| LRRC55   | -0.302716833 | 2.24E-12 | 1.85E-11 |
| LRRC56   | -0.28448236  | 4.81E-11 | 3.24E-10 |
| LRRC57   | 0.035193898  | 0.425461 | 0.500124 |
| LRRC58   | 0.033492297  | 0.448195 | 0.522428 |
| LRRC59   | 0.473467467  | 3.92E-30 | 4.45E-28 |
| LRRC61   | 0.245107955  | 1.75E-08 | 8.07E-08 |

|         |              |          |          |
|---------|--------------|----------|----------|
| LRRC66  | 0.060659492  | 0.169285 | 0.226773 |
| LRRC67  | -0.197582854 | 6.25E-06 | 1.93E-05 |
| LRRC69  | 0.033838782  | 0.443511 | 0.517719 |
| LRRC6   | -0.074711765 | 0.090317 | 0.129865 |
| LRRC70  | -0.213144296 | 1.05E-06 | 3.68E-06 |
| LRRC7   | 0.014149072  | 0.748719 | 0.797091 |
| LRRC8A  | -0.041096428 | 0.351981 | 0.426595 |
| LRRC8B  | -0.005352816 | 0.903548 | 0.924501 |
| LRRC8C  | -0.164692534 | 0.000174 | 0.000426 |
| LRRC8D  | 0.058748721  | 0.183146 | 0.242682 |
| LRRC8E  | -0.112890547 | 0.010351 | 0.018316 |
| LRRCC1  | 0.082316124  | 0.061946 | 0.092797 |
| LRRFIP1 | -0.099699647 | 0.023655 | 0.0388   |
| LRRFIP2 | -0.052458725 | 0.234674 | 0.301128 |
| LRRIQ1  | -0.147555788 | 0.000783 | 0.001697 |
| LRRIQ3  | -0.017278795 | 0.695653 | 0.751606 |
| LRRIQ4  | 0.185186748  | 2.35E-05 | 6.62E-05 |
| LRRK1   | -0.25238262  | 6.33E-09 | 3.11E-08 |
| LRRK2   | -0.406713539 | 6.17E-22 | 2.16E-20 |
| LRRN1   | -0.094778047 | 0.031518 | 0.050342 |
| LRRN2   | -0.135791869 | 0.002012 | 0.004058 |
| LRRN3   | -0.331571006 | 1.11E-14 | 1.30E-13 |
| LRRN4CL | -0.158321309 | 0.00031  | 0.000722 |
| LRRN4   | -0.234884889 | 6.93E-08 | 2.92E-07 |
| LRRTM1  | -0.225014381 | 2.47E-07 | 9.53E-07 |
| LRRTM2  | -0.122867432 | 0.005236 | 0.009804 |
| LRRTM3  | 0.104153815  | 0.018063 | 0.030384 |
| LRRTM4  | -0.049943015 | 0.257912 | 0.326656 |
| LRSAM1  | -0.246353627 | 1.47E-08 | 6.87E-08 |
| LRTM1   | 0.006595787  | 0.881301 | 0.906934 |
| LRTM2   | 0.056716769  | 0.198787 | 0.260565 |
| LRTOMT  | -0.144195867 | 0.001032 | 0.00219  |
| LRWD1   | 0.128959508  | 0.003371 | 0.006521 |
| LSAMP   | -0.304310948 | 1.70E-12 | 1.43E-11 |
| LSG1    | 0.195172386  | 8.14E-06 | 2.47E-05 |
| LSM10   | 0.079199324  | 0.072531 | 0.106842 |
| LSM11   | 0.063748095  | 0.148562 | 0.202087 |
| LSM12   | 0.388970421  | 4.76E-20 | 1.24E-18 |
| LSM14A  | 0.119213813  | 0.006759 | 0.012392 |
| LSM14B  | -0.050141458 | 0.256023 | 0.324605 |
| LSM1    | 0.238668354  | 4.19E-08 | 1.83E-07 |
| LSM2    | 0.325273643  | 3.72E-14 | 4.03E-13 |
| LSM3    | 0.25079246   | 7.93E-09 | 3.85E-08 |
| LSM4    | 0.245242961  | 1.72E-08 | 7.93E-08 |

|           |              |          |          |
|-----------|--------------|----------|----------|
| LSM5      | 0.35575488   | 8.24E-17 | 1.33E-15 |
| LSM6      | 0.17730653   | 5.21E-05 | 0.000139 |
| LSM7      | 0.099512696  | 0.023919 | 0.039192 |
| LSMD1     | 0.024815972  | 0.574196 | 0.641892 |
| LSP1      | -0.281481246 | 7.81E-11 | 5.11E-10 |
| LSR       | -0.087286158 | 0.047725 | 0.073261 |
| LSS       | -0.260879317 | 1.85E-09 | 9.84E-09 |
| LST-3TM12 | 0.012335042  | 0.780048 | 0.822992 |
| LST1      | -0.215720742 | 7.74E-07 | 2.76E-06 |
| LTA4H     | -0.18074888  | 3.69E-05 | 0.000101 |
| LTA       | -0.184971382 | 2.40E-05 | 6.76E-05 |
| LTB4R2    | -0.250070198 | 8.77E-09 | 4.23E-08 |
| LTB4R     | -0.21209558  | 1.19E-06 | 4.13E-06 |
| LTBP1     | -0.037408695 | 0.396899 | 0.471822 |
| LTBP2     | -0.311397039 | 4.83E-13 | 4.42E-12 |
| LTBP3     | -0.328558119 | 1.99E-14 | 2.24E-13 |
| LTBP4     | -0.360767647 | 2.83E-17 | 4.93E-16 |
| LTBR      | 0.274427698  | 2.38E-10 | 1.45E-09 |
| LTB       | -0.251832727 | 6.84E-09 | 3.35E-08 |
| LTC4S     | -0.419288317 | 2.41E-23 | 1.04E-21 |
| LTF       | -0.170179897 | 0.000104 | 0.000264 |
| LTK       | -0.040971206 | 0.353452 | 0.428065 |
| LTV1      | 0.280480574  | 9.16E-11 | 5.93E-10 |
| LUC7L2    | -0.008324261 | 0.850523 | 0.881938 |
| LUC7L3    | -0.294900504 | 8.58E-12 | 6.49E-11 |
| LUC7L     | -0.276111257 | 1.83E-10 | 1.13E-09 |
| LUM       | -0.067907002 | 0.123783 | 0.171818 |
| LUZP1     | -0.037388605 | 0.397153 | 0.472012 |
| LUZP2     | -0.292560548 | 1.27E-11 | 9.37E-11 |
| LUZP4     | 0.034268005  | 0.437747 | 0.512037 |
| LUZP6     | 0.299466461  | 3.94E-12 | 3.11E-11 |
| LXN       | 0.008680749  | 0.844201 | 0.876657 |
| LY6D      | 0.088145478  | 0.045568 | 0.070301 |
| LY6E      | -0.160411005 | 0.000257 | 0.000609 |
| LY6G5B    | -0.236155408 | 5.86E-08 | 2.49E-07 |
| LY6G5C    | -0.170221883 | 0.000104 | 0.000263 |
| LY6G6C    | 0.039162352  | 0.375124 | 0.449951 |
| LY6G6D    | -0.0113076   | 0.797955 | 0.838345 |
| LY6G6E    | -0.00788087  | 0.858398 | 0.888538 |
| LY6G6F    | -0.094765477 | 0.03154  | 0.050374 |
| LY6H      | -0.040268943 | 0.36177  | 0.436342 |
| LY6K      | 0.158960083  | 0.000293 | 0.000685 |
| LY75      | -0.155288164 | 0.000405 | 0.000922 |
| LY86      | -0.302458546 | 2.35E-12 | 1.93E-11 |



|          |              |          |          |
|----------|--------------|----------|----------|
| LY96     | 0.021281315  | 0.629926 | 0.691906 |
| LY9      | -0.174295027 | 7.00E-05 | 0.000182 |
| LYAR     | 0.472299638  | 5.66E-30 | 6.25E-28 |
| LYG1     | 0.013326357  | 0.762879 | 0.809279 |
| LYG2     | 0.104831878  | 0.017322 | 0.029212 |
| LYL1     | -0.320428672 | 9.24E-14 | 9.40E-13 |
| LYNX1    | -0.313335227 | 3.40E-13 | 3.20E-12 |
| LYN      | 0.052449337  | 0.234758 | 0.301197 |
| LYPD1    | 0.13538142   | 0.002077 | 0.00418  |
| LYPD2    | -0.149716266 | 0.000653 | 0.001436 |
| LYPD3    | 0.246693692  | 1.41E-08 | 6.57E-08 |
| LYPD4    | 0.003246186  | 0.941417 | 0.953679 |
| LYPD5    | 0.02093937   | 0.635438 | 0.696792 |
| LYPD6B   | 0.037142881  | 0.400265 | 0.474809 |
| LYPD6    | 0.034281798  | 0.437563 | 0.511911 |
| LYPLA1   | 0.375269766  | 1.15E-18 | 2.47E-17 |
| LYPLA2P1 | -0.038003475 | 0.38943  | 0.464241 |
| LYPLA2   | -0.126043016 | 0.004172 | 0.00794  |
| LYPLAL1  | 0.065127394  | 0.139957 | 0.191777 |
| LYRM1    | -0.066622569 | 0.131066 | 0.180872 |
| LYRM2    | -0.001047454 | 0.981082 | 0.985965 |
| LYRM4    | 0.251290861  | 7.39E-09 | 3.61E-08 |
| LYRM5    | 0.041374792  | 0.348726 | 0.423188 |
| LYRM7    | -0.095763304 | 0.029786 | 0.047873 |
| LYSMD1   | 0.143196519  | 0.00112  | 0.002361 |
| LYSMD2   | -0.110488578 | 0.012108 | 0.0211   |
| LYSMD3   | 0.036978557  | 0.402354 | 0.477002 |
| LYSMD4   | -0.282016584 | 7.16E-11 | 4.71E-10 |
| LYST     | -0.330810436 | 1.29E-14 | 1.49E-13 |
| LYVE1    | -0.00644564  | 0.883984 | 0.90909  |
| LYZL1    | 0.084011002  | 0.056748 | 0.085722 |
| LYZL2    | 0.18950599   | 1.50E-05 | 4.36E-05 |
| LYZL4    | -0.094366141 | 0.032267 | 0.051407 |
| LYZL6    | 0.034538065  | 0.434143 | 0.508744 |
| LYZ      | -0.192505788 | 1.09E-05 | 3.23E-05 |
| LZIC     | 0.248806554  | 1.05E-08 | 5.00E-08 |
| LZTFL1   | -0.187338121 | 1.88E-05 | 5.39E-05 |
| LZTR1    | -0.200385878 | 4.58E-06 | 1.45E-05 |
| LZTS1    | -0.035809447 | 0.417405 | 0.492073 |
| LZTS2    | -0.121641214 | 0.005709 | 0.010608 |
| M6PR     | 0.134644301  | 0.002198 | 0.004402 |
| MAB21L1  | -0.262869314 | 1.38E-09 | 7.48E-09 |
| MAB21L2  | -0.174738709 | 6.70E-05 | 0.000175 |
| MACC1    | -0.265738838 | 8.99E-10 | 5.04E-09 |

|          |              |          |          |
|----------|--------------|----------|----------|
| MACF1    | -0.382230007 | 2.32E-19 | 5.58E-18 |
| MACROD1  | -0.083564426 | 0.058081 | 0.087485 |
| MACROD2  | -0.343223231 | 1.10E-15 | 1.52E-14 |
| MAD1L1   | -0.082517988 | 0.061307 | 0.091956 |
| MAD2L1BP | 0.209995991  | 1.53E-06 | 5.19E-06 |
| MAD2L1   | 0.578696263  | 2.26E-47 | 6.46E-44 |
| MAD2L2   | 0.160777526  | 0.000249 | 0.00059  |
| MADCAM1  | -0.102663785 | 0.01979  | 0.033018 |
| MADD     | -0.333629725 | 7.44E-15 | 8.97E-14 |
| MAEA     | 0.111105391  | 0.011633 | 0.020358 |
| MAEL     | -0.101782771 | 0.020877 | 0.034672 |
| MAF1     | 0.149091998  | 0.000688 | 0.001509 |
| MAFA     | 0.156701573  | 0.000358 | 0.000823 |
| MAFB     | -0.107806803 | 0.014376 | 0.0247   |
| MAFF     | 0.018965588  | 0.667639 | 0.725892 |
| MAFG     | 0.087777332  | 0.046482 | 0.0716   |
| MAFK     | 0.032005235  | 0.468615 | 0.542366 |
| MAF      | -0.1587492   | 0.000298 | 0.000697 |
| MAGEA10  | 0.073569505  | 0.095363 | 0.136288 |
| MAGEA11  | 0.164828443  | 0.000172 | 0.000421 |
| MAGEA12  | 0.197573375  | 6.26E-06 | 1.93E-05 |
| MAGEA1   | 0.239903759  | 3.55E-08 | 1.56E-07 |
| MAGEA2   | 0.228108727  | 1.67E-07 | 6.61E-07 |
| MAGEA3   | 0.25098437   | 7.71E-09 | 3.76E-08 |
| MAGEA4   | 0.099911753  | 0.023358 | 0.038373 |
| MAGEA5   | -0.003264337 | 0.94109  | 0.953493 |
| MAGEA6   | 0.243045925  | 2.32E-08 | 1.05E-07 |
| MAGEA8   | 0.111739204  | 0.011163 | 0.019615 |
| MAGEA9B  | 0.107064646  | 0.015067 | 0.025784 |
| MAGEB10  | 0.028038351  | 0.525513 | 0.597506 |
| MAGEB16  | 0.084737434  | 0.054633 | 0.082891 |
| MAGEB18  | 0.11838153   | 0.007157 | 0.013056 |
| MAGEB1   | 0.1251675    | 0.004444 | 0.008419 |
| MAGEB2   | 0.213716227  | 9.84E-07 | 3.46E-06 |
| MAGEB3   | 0.07354461   | 0.095476 | 0.136429 |
| MAGEB4   | 0.04992495   | 0.258085 | 0.326845 |
| MAGEB6   | 0.2015401    | 4.03E-06 | 1.28E-05 |
| MAGEC1   | 0.181666957  | 3.37E-05 | 9.25E-05 |
| MAGEC2   | 0.190555046  | 1.34E-05 | 3.93E-05 |
| MAGEC3   | -0.032401192 | 0.463128 | 0.537042 |
| MAGED1   | 0.068329884  | 0.121455 | 0.16908  |
| MAGED2   | 0.035563997  | 0.420607 | 0.495234 |
| MAGED4B  | -0.004033662 | 0.927241 | 0.943139 |
| MAGED4   | -0.00046857  | 0.991536 | 0.993724 |

|        |              |          |          |
|--------|--------------|----------|----------|
| MAGEE1 | -0.302930668 | 2.16E-12 | 1.79E-11 |
| MAGEE2 | -0.323520016 | 5.18E-14 | 5.47E-13 |
| MAGEF1 | 0.033197847  | 0.452198 | 0.526519 |
| MAGEH1 | -0.116128348 | 0.008342 | 0.015031 |
| MAGEL2 | -0.067315777 | 0.127095 | 0.17589  |
| MAGI1  | -0.303014532 | 2.13E-12 | 1.77E-11 |
| MAGI2  | -0.305535795 | 1.37E-12 | 1.17E-11 |
| MAGI3  | -0.330606887 | 1.34E-14 | 1.55E-13 |
| MAGIX  | -0.122066206 | 0.005541 | 0.010328 |
| MAGOHB | 0.413877244  | 9.90E-23 | 3.88E-21 |
| MAGOH  | 0.244201869  | 1.98E-08 | 9.08E-08 |
| MAGT1  | 0.151765381  | 0.000549 | 0.001221 |
| MAG    | -0.193413122 | 9.85E-06 | 2.95E-05 |
| MAK16  | 0.200848474  | 4.35E-06 | 1.38E-05 |
| MAK    | -0.213998176 | 9.51E-07 | 3.35E-06 |
| MAL2   | -0.086937373 | 0.048625 | 0.074574 |
| MALAT1 | -0.33350911  | 7.62E-15 | 9.15E-14 |
| MALL   | -0.30487344  | 1.54E-12 | 1.31E-11 |
| MALT1  | -0.087769047 | 0.046503 | 0.071627 |
| MAL    | -0.331397803 | 1.15E-14 | 1.34E-13 |
| MAMDC2 | -0.406214348 | 7.00E-22 | 2.43E-20 |
| MAMDC4 | -0.261913425 | 1.59E-09 | 8.54E-09 |
| MAML1  | -0.207233956 | 2.11E-06 | 7.00E-06 |
| MAML2  | -0.301295208 | 2.87E-12 | 2.33E-11 |
| MAML3  | -0.157124339 | 0.000345 | 0.000795 |
| MAMLD1 | -0.083109775 | 0.059465 | 0.089381 |
| MAMSTR | 0.145853127  | 0.000901 | 0.00193  |
| MAN1A1 | -0.027327805 | 0.536064 | 0.60704  |
| MAN1A2 | 0.083126678  | 0.059413 | 0.08933  |
| MAN1B1 | -0.017259668 | 0.695974 | 0.751871 |
| MAN1C1 | -0.424200774 | 6.54E-24 | 3.09E-22 |
| MAN2A1 | 0.148761136  | 0.000708 | 0.001548 |
| MAN2A2 | -0.211624175 | 1.26E-06 | 4.35E-06 |
| MAN2B1 | -0.296609919 | 6.42E-12 | 4.94E-11 |
| MAN2B2 | -0.21294439  | 1.08E-06 | 3.76E-06 |
| MAN2C1 | -0.332151018 | 9.92E-15 | 1.17E-13 |
| MANBAL | 0.150615047  | 0.000605 | 0.001338 |
| MANBA  | -0.179083524 | 4.36E-05 | 0.000118 |
| MANEAL | -0.114111837 | 0.009548 | 0.01702  |
| MANEA  | 0.037184472  | 0.399737 | 0.474378 |
| MANF   | 0.331011463  | 1.24E-14 | 1.44E-13 |
| MANSC1 | 0.001936477  | 0.965033 | 0.973164 |
| MAOA   | -0.196316891 | 7.19E-06 | 2.20E-05 |
| MAOB   | -0.323496738 | 5.20E-14 | 5.49E-13 |

|           |              |          |          |
|-----------|--------------|----------|----------|
| MAP1A     | -0.109142386 | 0.013204 | 0.022844 |
| MAP1B     | 0.026291078  | 0.551648 | 0.621625 |
| MAP1D     | 0.036399466  | 0.409768 | 0.48447  |
| MAP1LC3A  | -0.276289745 | 1.78E-10 | 1.10E-09 |
| MAP1LC3B2 | 0.17828285   | 4.73E-05 | 0.000127 |
| MAP1LC3B  | 0.060643308  | 0.169399 | 0.226865 |
| MAP1LC3C  | -0.217383634 | 6.33E-07 | 2.30E-06 |
| MAP1S     | -0.188017953 | 1.75E-05 | 5.05E-05 |
| MAP2K1    | 0.196668415  | 6.92E-06 | 2.12E-05 |
| MAP2K2    | 0.080444744  | 0.068137 | 0.101062 |
| MAP2K3    | -0.093780635 | 0.033359 | 0.05296  |
| MAP2K4    | 0.13209731   | 0.002668 | 0.005261 |
| MAP2K5    | -0.123322834 | 0.00507  | 0.009517 |
| MAP2K6    | 0.111199465  | 0.011563 | 0.02025  |
| MAP2K7    | -0.262075169 | 1.55E-09 | 8.37E-09 |
| MAP2      | 0.039165943  | 0.37508  | 0.449925 |
| MAP3K10   | -0.013787406 | 0.754934 | 0.80217  |
| MAP3K11   | -0.160281196 | 0.00026  | 0.000615 |
| MAP3K12   | -0.283955211 | 5.24E-11 | 3.51E-10 |
| MAP3K13   | -0.273560296 | 2.72E-10 | 1.64E-09 |
| MAP3K14   | -0.321345563 | 7.78E-14 | 8.02E-13 |
| MAP3K15   | -0.221320147 | 3.91E-07 | 1.46E-06 |
| MAP3K1    | -0.28606234  | 3.72E-11 | 2.55E-10 |
| MAP3K2    | 0.100499517  | 0.022552 | 0.037171 |
| MAP3K3    | -0.496085933 | 2.40E-33 | 4.89E-31 |
| MAP3K4    | -0.14427064  | 0.001026 | 0.00218  |
| MAP3K5    | -0.227716453 | 1.75E-07 | 6.94E-07 |
| MAP3K6    | -0.351891819 | 1.86E-16 | 2.84E-15 |
| MAP3K7    | 0.108692862  | 0.013589 | 0.023455 |
| MAP3K8    | -0.153247302 | 0.000483 | 0.001086 |
| MAP3K9    | -0.00112202  | 0.979735 | 0.985008 |
| MAP4K1    | -0.2637164   | 1.22E-09 | 6.66E-09 |
| MAP4K2    | -0.133374654 | 0.002422 | 0.004811 |
| MAP4K3    | 0.216383782  | 7.14E-07 | 2.56E-06 |
| MAP4K4    | 0.219120264  | 5.12E-07 | 1.89E-06 |
| MAP4K5    | 0.188630516  | 1.64E-05 | 4.75E-05 |
| MAP4      | -0.033572938 | 0.447103 | 0.521394 |
| MAP6D1    | 0.256326464  | 3.60E-09 | 1.83E-08 |
| MAP6      | -0.363468091 | 1.57E-17 | 2.84E-16 |
| MAP7D1    | -0.138626348 | 0.001613 | 0.003303 |
| MAP7D2    | -0.161609303 | 0.000231 | 0.000552 |
| MAP7D3    | -0.032483668 | 0.46199  | 0.535878 |
| MAP7      | 0.078826316  | 0.073891 | 0.10863  |
| MAP9      | -0.186370984 | 2.08E-05 | 5.92E-05 |

|           |        |              |          |          |
|-----------|--------|--------------|----------|----------|
| MAPK10    |        | -0.466547673 | 3.39E-29 | 3.25E-27 |
| MAPK11    |        | -0.15925534  | 0.000285 | 0.000669 |
| MAPK12    |        | 0.135419071  | 0.002071 | 0.004168 |
| MAPK13    |        | -0.011929172 | 0.787108 | 0.829041 |
| MAPK14    |        | 0.023584142  | 0.593353 | 0.659289 |
| MAPK15    |        | -0.194363852 | 8.89E-06 | 2.68E-05 |
| MAPK1IP1L |        | 0.348827126  | 3.51E-16 | 5.19E-15 |
| MAPK1     |        | 0.018108296  | 0.681822 | 0.738819 |
| MAPK3     |        | -0.130388184 | 0.003032 | 0.005915 |
| MAPK4     |        | -0.119276255 | 0.00673  | 0.012345 |
| MAPK6     |        | 0.406908795  | 5.87E-22 | 2.06E-20 |
| MAPK7     |        | -0.141832125 | 0.00125  | 0.002615 |
| MAPK8IP1  |        | -0.259381513 | 2.31E-09 | 1.21E-08 |
| MAPK8IP2  |        | -0.057542885 | 0.192314 | 0.253243 |
| MAPK8IP3  |        | -0.348138553 | 4.04E-16 | 5.93E-15 |
| MAPK8     |        | 0.309597393  | 6.67E-13 | 6.00E-12 |
| MAPK9     |        | -0.067294674 | 0.127215 | 0.176043 |
| MAPKAP1   |        | 0.137613614  | 0.001746 | 0.003556 |
| MAPKAPK2  |        | -0.0778313   | 0.077621 | 0.113544 |
| MAPKAPK3  |        | -0.136706517 | 0.001874 | 0.003796 |
| MAPKAPK5  |        | 0.410499094  | 2.36E-22 | 8.65E-21 |
| MAPKBP1   |        | -0.358758424 | 4.35E-17 | 7.34E-16 |
| MAPKSP1   |        | 0.037755354  | 0.392536 | 0.467413 |
| MAPRE1    |        | 0.374293504  | 1.43E-18 | 3.03E-17 |
| MAPRE2    |        | -0.139472111 | 0.001509 | 0.00311  |
| MAPRE3    |        | -0.355968546 | 7.88E-17 | 1.28E-15 |
| MAPT      |        | -0.204748807 | 2.80E-06 | 9.13E-06 |
|           | 10-Mar | -0.094538936 | 0.031951 | 0.050944 |
|           | 11-Mar | 0.073705995  | 0.094749 | 0.135477 |
|           | 1-Mar  | -0.135512194 | 0.002056 | 0.00414  |
|           | 2-Mar  | -0.187736387 | 1.80E-05 | 5.19E-05 |
|           | 3-Mar  | -0.072954531 | 0.098172 | 0.139951 |
|           | 4-Mar  | 0.047226446  | 0.28474  | 0.355623 |
|           | 5-Mar  | 0.37217807   | 2.30E-18 | 4.71E-17 |
|           | 6-Mar  | 0.037379572  | 0.397267 | 0.472088 |
|           | 7-Mar  | 0.202398018  | 3.66E-06 | 1.17E-05 |
|           | 8-Mar  | -0.075087093 | 0.088707 | 0.127807 |
|           | 9-Mar  | -0.207183827 | 2.12E-06 | 7.04E-06 |
| MARCKSL1  |        | 0.21935428   | 4.98E-07 | 1.84E-06 |
| MARCKS    |        | 0.164968889  | 0.00017  | 0.000416 |
| MARCO     |        | -0.215151672 | 8.28E-07 | 2.94E-06 |
| MARK1     |        | 0.024900818  | 0.572888 | 0.641003 |
| MARK2     |        | 0.009644981  | 0.827154 | 0.862405 |
| MARK3     |        | 0.069027644  | 0.117689 | 0.164341 |

|          |              |          |          |
|----------|--------------|----------|----------|
| MARK4    | 0.072300645  | 0.10123  | 0.143835 |
| MARS2    | 0.29108187   | 1.63E-11 | 1.18E-10 |
| MARS     | 0.378393928  | 5.62E-19 | 1.27E-17 |
| MARVELD1 | 0.060506307  | 0.170367 | 0.227999 |
| MARVELD2 | -0.163869268 | 0.000188 | 0.000456 |
| MARVELD3 | 0.047321576  | 0.28377  | 0.354588 |
| MAS1L    | -0.323551567 | 5.15E-14 | 5.44E-13 |
| MAS1     | -0.014849192 | 0.736734 | 0.786931 |
| MASP1    | -0.258878232 | 2.48E-09 | 1.29E-08 |
| MASP2    | -0.391408746 | 2.66E-20 | 7.27E-19 |
| MAST1    | 0.130579222  | 0.002989 | 0.00584  |
| MAST2    | -0.015368889 | 0.727879 | 0.779472 |
| MAST3    | -0.384462793 | 1.38E-19 | 3.43E-18 |
| MAST4    | -0.285483935 | 4.09E-11 | 2.78E-10 |
| MASTL    | 0.351268155  | 2.11E-16 | 3.20E-15 |
| MAT1A    | 0.012571484  | 0.775943 | 0.819663 |
| MAT2A    | -0.247169953 | 1.32E-08 | 6.18E-08 |
| MAT2B    | -0.101139456 | 0.021703 | 0.035904 |
| MATK     | -0.227169541 | 1.88E-07 | 7.40E-07 |
| MATN1    | -0.106787607 | 0.015332 | 0.026172 |
| MATN2    | -0.144533634 | 0.001004 | 0.002136 |
| MATN3    | -0.09220509  | 0.036453 | 0.057403 |
| MATN4    | -0.198789412 | 5.47E-06 | 1.71E-05 |
| MATR3    | 0.04498985   | 0.308195 | 0.380095 |
| MAVS     | -0.134481836 | 0.002225 | 0.004452 |
| MAX      | 0.054288939  | 0.218725 | 0.283208 |
| MAZ      | 0.197079009  | 6.61E-06 | 2.03E-05 |
| MBD1     | -0.056734153 | 0.198649 | 0.260429 |
| MBD2     | 0.00210763   | 0.961945 | 0.970882 |
| MBD3L1   | 0.044186623  | 0.31692  | 0.389319 |
| MBD3L2   | 0.062443106  | 0.157069 | 0.212229 |
| MBD3L5   | 0.052421932  | 0.235003 | 0.301473 |
| MBD3     | -0.085484021 | 0.052528 | 0.079983 |
| MBD4     | 0.013168034  | 0.765614 | 0.811318 |
| MBD5     | -0.177829226 | 4.95E-05 | 0.000132 |
| MBD6     | -0.209809503 | 1.56E-06 | 5.30E-06 |
| MBIP     | -0.273091461 | 2.93E-10 | 1.76E-09 |
| MBL1P    | -0.443898397 | 2.81E-26 | 1.91E-24 |
| MBL2     | -0.000688297 | 0.987568 | 0.99069  |
| MBLAC1   | 0.044251435  | 0.31621  | 0.38859  |
| MBLAC2   | -0.127505072 | 0.003751 | 0.007195 |
| MBNL1    | -0.222014838 | 3.59E-07 | 1.35E-06 |
| MBNL2    | -0.142067012 | 0.001227 | 0.002569 |
| MBNL3    | -0.141067806 | 0.001329 | 0.002764 |

|          |              |          |          |
|----------|--------------|----------|----------|
| MBOAT1   | -0.189501069 | 1.50E-05 | 4.36E-05 |
| MBOAT2   | -0.031831343 | 0.471035 | 0.544758 |
| MBOAT4   | -0.127881346 | 0.003649 | 0.007011 |
| MBOAT7   | -0.063910443 | 0.147529 | 0.200845 |
| MBP      | -0.117505425 | 0.007599 | 0.0138   |
| MBTD1    | -0.134437349 | 0.002233 | 0.004465 |
| MBTPS1   | -0.032955975 | 0.455501 | 0.529481 |
| MBTPS2   | 0.202686224  | 3.54E-06 | 1.14E-05 |
| MB       | 0.134832974  | 0.002166 | 0.004344 |
| MC1R     | 0.162162896  | 0.000219 | 0.000527 |
| MC2R     | -0.15599144  | 0.000381 | 0.000871 |
| MC3R     | 0.018731763  | 0.671496 | 0.72933  |
| MC4R     | -0.111145221 | 0.011603 | 0.020311 |
| MC5R     | -0.260547346 | 1.94E-09 | 1.03E-08 |
| MCAM     | 0.120515095  | 0.006176 | 0.0114   |
| MCART1   | 0.115302478  | 0.008818 | 0.015803 |
| MCART2   | 0.069837725  | 0.113432 | 0.159197 |
| MCART3P  | 0.022750925  | 0.606474 | 0.671219 |
| MCART6   | -0.183903681 | 2.68E-05 | 7.49E-05 |
| MCAT     | 0.041971367  | 0.341814 | 0.416031 |
| MCCC1    | -0.258374427 | 2.67E-09 | 1.38E-08 |
| MCCC2    | 0.105440481  | 0.01668  | 0.02824  |
| MCCD1    | 0.060109239  | 0.173194 | 0.231373 |
| MCC      | -0.273682197 | 2.67E-10 | 1.61E-09 |
| MCEE     | -0.038568689 | 0.382412 | 0.457027 |
| MCF2L2   | 0.131327709  | 0.002827 | 0.005545 |
| MCF2L    | -0.163617465 | 0.000192 | 0.000466 |
| MCF2     | -0.030818183 | 0.485276 | 0.558899 |
| MCFD2    | 0.231583108  | 1.07E-07 | 4.37E-07 |
| MCHR1    | 0.111360729  | 0.011442 | 0.020067 |
| MCHR2    | 0.147195422  | 0.000807 | 0.001744 |
| MCL1     | -0.05033861  | 0.254156 | 0.322647 |
| MCM10    | 0.515123994  | 3.03E-36 | 1.10E-33 |
| MCM2     | 0.322272523  | 6.55E-14 | 6.82E-13 |
| MCM3APAS | 0.014258409  | 0.746843 | 0.795349 |
| MCM3AP   | -0.24689347  | 1.37E-08 | 6.40E-08 |
| MCM3     | 0.206183742  | 2.38E-06 | 7.84E-06 |
| MCM4     | 0.439796894  | 9.01E-26 | 5.70E-24 |
| MCM5     | 0.149404493  | 0.00067  | 0.001472 |
| MCM6     | 0.39020421   | 3.55E-20 | 9.55E-19 |
| MCM7     | 0.358924747  | 4.20E-17 | 7.12E-16 |
| MCM8     | 0.257141587  | 3.20E-09 | 1.63E-08 |
| MCM9     | -0.213366839 | 1.03E-06 | 3.60E-06 |
| MCOLN1   | -0.276606669 | 1.69E-10 | 1.05E-09 |

|        |              |          |          |
|--------|--------------|----------|----------|
| MCOLN2 | -0.187516975 | 1.84E-05 | 5.30E-05 |
| MCOLN3 | -0.219372569 | 4.97E-07 | 1.84E-06 |
| MCPH1  | 0.03748244   | 0.395968 | 0.470856 |
| MCRS1  | 0.249837693  | 9.07E-09 | 4.37E-08 |
| MCTP1  | -0.072466767 | 0.100446 | 0.142867 |
| MCTP2  | -0.184363735 | 2.56E-05 | 7.17E-05 |
| MCTS1  | 0.176275576  | 5.77E-05 | 0.000152 |
| MDC1   | -0.010935531 | 0.804466 | 0.84359  |
| MDFIC  | 0.017531483  | 0.691429 | 0.747649 |
| MDFI   | 0.207266157  | 2.10E-06 | 6.98E-06 |
| MDGA1  | -0.234584985 | 7.21E-08 | 3.03E-07 |
| MDGA2  | 0.178768184  | 4.50E-05 | 0.000121 |
| MDH1B  | -0.199682406 | 4.96E-06 | 1.55E-05 |
| MDH1   | 0.254083843  | 4.97E-09 | 2.48E-08 |
| MDH2   | 0.36256394   | 1.92E-17 | 3.41E-16 |
| MDK    | 0.087492824  | 0.047199 | 0.07258  |
| MDM1   | -0.032133672 | 0.466831 | 0.540678 |
| MDM2   | 0.01952683   | 0.658417 | 0.71762  |
| MDM4   | -0.272336405 | 3.29E-10 | 1.96E-09 |
| MDN1   | -0.182604623 | 3.06E-05 | 8.46E-05 |
| MDP1   | -0.002822687 | 0.949049 | 0.960291 |
| MDS2   | -0.166149301 | 0.000152 | 0.000375 |
| ME1    | 0.238452886  | 4.32E-08 | 1.88E-07 |
| ME2    | 0.056500667  | 0.200506 | 0.26268  |
| ME3    | -0.088499016 | 0.044705 | 0.069107 |
| MEA1   | 0.153717837  | 0.000464 | 0.001046 |
| MEAF6  | -0.17563608  | 6.14E-05 | 0.000161 |
| MECOM  | -0.238222862 | 4.45E-08 | 1.93E-07 |
| MECP2  | -0.322097254 | 6.76E-14 | 7.03E-13 |
| MECR   | -0.08485792  | 0.054289 | 0.082437 |
| MED10  | 0.120193812  | 0.006316 | 0.011639 |
| MED11  | -0.08367129  | 0.05776  | 0.087066 |
| MED12L | -0.063640468 | 0.14925  | 0.20294  |
| MED12  | -0.114186117 | 0.009501 | 0.016939 |
| MED13L | -0.030607525 | 0.488266 | 0.561566 |
| MED13  | -0.037840042 | 0.391474 | 0.466344 |
| MED14  | 0.068088814  | 0.122778 | 0.170719 |
| MED15  | -0.185293049 | 2.32E-05 | 6.55E-05 |
| MED16  | -0.217969219 | 5.89E-07 | 2.15E-06 |
| MED17  | 0.174099426  | 7.14E-05 | 0.000186 |
| MED18  | 0.021321934  | 0.629273 | 0.691626 |
| MED19  | 0.203577402  | 3.20E-06 | 1.03E-05 |
| MED1   | 0.045047524  | 0.307574 | 0.379447 |
| MED20  | 0.230330747  | 1.25E-07 | 5.09E-07 |



|         |              |          |          |
|---------|--------------|----------|----------|
| MED21   | 0.161513375  | 0.000233 | 0.000556 |
| MED22   | -0.109201312 | 0.013154 | 0.022778 |
| MED23   | -0.151189568 | 0.000576 | 0.001279 |
| MED24   | -0.001599229 | 0.97112  | 0.978265 |
| MED25   | -0.219641946 | 4.80E-07 | 1.78E-06 |
| MED26   | -0.337469631 | 3.49E-15 | 4.46E-14 |
| MED27   | 0.264332211  | 1.11E-09 | 6.13E-09 |
| MED28   | 0.213901684  | 9.62E-07 | 3.39E-06 |
| MED29   | -0.183126007 | 2.90E-05 | 8.06E-05 |
| MED30   | 0.181245694  | 3.51E-05 | 9.63E-05 |
| MED31   | 0.111127209  | 0.011617 | 0.020331 |
| MED4    | 0.007831454  | 0.859277 | 0.889309 |
| MED6    | 0.373223542  | 1.82E-18 | 3.76E-17 |
| MED7    | -0.049672725 | 0.2605   | 0.329341 |
| MED8    | 0.145531879  | 0.000925 | 0.001979 |
| MED9    | -0.134417928 | 0.002236 | 0.004471 |
| MEF2A   | -0.34104932  | 1.71E-15 | 2.29E-14 |
| MEF2B   | -0.117296083 | 0.007708 | 0.013978 |
| MEF2C   | -0.365137738 | 1.09E-17 | 2.03E-16 |
| MEF2D   | -0.110928663 | 0.011768 | 0.020562 |
| MEFV    | -0.083022161 | 0.059735 | 0.089766 |
| MEG3    | -0.174489199 | 6.87E-05 | 0.000179 |
| MEG8    | -0.068389281 | 0.121131 | 0.168687 |
| MEGF10  | 0.004081222  | 0.926386 | 0.942416 |
| MEGF11  | -0.379827605 | 4.04E-19 | 9.34E-18 |
| MEGF6   | -0.480015015 | 4.87E-31 | 6.38E-29 |
| MEGF8   | -0.110598695 | 0.012022 | 0.020961 |
| MEGF9   | -0.152315746 | 0.000523 | 0.00117  |
| MEI1    | -0.100600299 | 0.022417 | 0.03697  |
| MEIG1   | -0.08226388  | 0.062113 | 0.093032 |
| MEIS1   | -0.311389575 | 4.83E-13 | 4.42E-12 |
| MEIS2   | -0.055280889 | 0.210412 | 0.273917 |
| MEIS3P1 | -0.185983453 | 2.16E-05 | 6.14E-05 |
| MEIS3   | 0.048644235  | 0.270512 | 0.340384 |
| MELK    | 0.497891426  | 1.30E-33 | 2.78E-31 |
| MEMO1   | 0.382705677  | 2.08E-19 | 5.01E-18 |
| MEN1    | -0.003175559 | 0.942689 | 0.954484 |
| MEOX1   | -0.357819257 | 5.31E-17 | 8.88E-16 |
| MEOX2   | -0.242369953 | 2.55E-08 | 1.15E-07 |
| MEP1A   | -0.089257109 | 0.0429   | 0.066567 |
| MEP1B   | 0.048631637  | 0.270637 | 0.340498 |
| MEPCE   | 0.009702315  | 0.826143 | 0.861553 |
| MEPE    | 0.13279911   | 0.00253  | 0.005007 |
| MERTK   | -0.287043935 | 3.17E-11 | 2.20E-10 |

|          |              |          |          |
|----------|--------------|----------|----------|
| MESDC1   | 0.034375409  | 0.436312 | 0.510806 |
| MESDC2   | 0.242202322  | 2.60E-08 | 1.17E-07 |
| MESP1    | -0.1452994   | 0.000943 | 0.002014 |
| MESP2    | -0.137057247 | 0.001824 | 0.003702 |
| MESTIT1  | -0.140341875 | 0.001408 | 0.002917 |
| MEST     | 0.371165219  | 2.88E-18 | 5.82E-17 |
| METAP1   | 0.341930982  | 1.43E-15 | 1.93E-14 |
| METAP2   | 0.270604489  | 4.29E-10 | 2.52E-09 |
| METRNL   | -0.108388733 | 0.013855 | 0.023877 |
| METRNL   | -0.106895316 | 0.015228 | 0.026017 |
| METT10D  | -0.114877164 | 0.009073 | 0.016223 |
| METT11D1 | -0.023553565 | 0.593832 | 0.659748 |
| METT5D1  | 0.098322108  | 0.025663 | 0.041799 |
| METTL10  | 0.266387816  | 8.15E-10 | 4.59E-09 |
| METTL11A | 0.305303727  | 1.43E-12 | 1.22E-11 |
| METTL11B | 0.079942255  | 0.069882 | 0.103337 |
| METTL12  | 0.138615187  | 0.001615 | 0.003305 |
| METTL13  | 0.110220276  | 0.01232  | 0.021443 |
| METTL14  | -0.091308736 | 0.03832  | 0.060064 |
| METTL1   | 0.2594669    | 2.28E-09 | 1.19E-08 |
| METTL2A  | 0.411978621  | 1.61E-22 | 6.08E-21 |
| METTL2B  | 0.341996726  | 1.41E-15 | 1.91E-14 |
| METTL3   | 0.020189071  | 0.647602 | 0.707879 |
| METTL4   | 0.175975589  | 5.94E-05 | 0.000156 |
| METTL5   | 0.354470617  | 1.08E-16 | 1.71E-15 |
| METTL6   | 0.221094429  | 4.02E-07 | 1.50E-06 |
| METTL7A  | -0.414962436 | 7.47E-23 | 2.98E-21 |
| METTL7B  | -0.066873461 | 0.129618 | 0.179071 |
| METTL8   | 0.301931696  | 2.57E-12 | 2.10E-11 |
| METTL9   | 0.287188262  | 3.10E-11 | 2.15E-10 |
| MET      | -0.077753966 | 0.077917 | 0.113929 |
| MEX3A    | 0.179391812  | 4.23E-05 | 0.000114 |
| MEX3B    | -0.000247394 | 0.995531 | 0.997028 |
| MEX3C    | 0.09437685   | 0.032248 | 0.05138  |
| MEX3D    | 0.124103148  | 0.004796 | 0.009043 |
| MFAP1    | 0.137216772  | 0.001801 | 0.00366  |
| MFAP2    | 0.052270137  | 0.236363 | 0.303023 |
| MFAP3L   | -0.011577131 | 0.793246 | 0.834364 |
| MFAP3    | 0.063273743  | 0.151613 | 0.205736 |
| MFAP4    | -0.422699628 | 9.77E-24 | 4.46E-22 |
| MFAP5    | 0.19521053   | 8.11E-06 | 2.46E-05 |
| MFF      | 0.264619112  | 1.06E-09 | 5.89E-09 |
| MFGE8    | -0.128966924 | 0.003369 | 0.006519 |
| MFHAS1   | -0.067917938 | 0.123722 | 0.171757 |

|          |              |          |          |
|----------|--------------|----------|----------|
| MF12     | 0.127347565  | 0.003795 | 0.007273 |
| MFN1     | 0.209844272  | 1.55E-06 | 5.28E-06 |
| MFN2     | -0.182689419 | 3.03E-05 | 8.40E-05 |
| MFNG     | -0.263949261 | 1.17E-09 | 6.45E-09 |
| MFRP     | -0.142118426 | 0.001222 | 0.002559 |
| MFSD10   | -0.143254545 | 0.001115 | 0.002352 |
| MFSD11   | -0.024888513 | 0.573077 | 0.641179 |
| MFSD1    | -0.131826935 | 0.002722 | 0.005359 |
| MFSD2A   | -0.323552095 | 5.15E-14 | 5.44E-13 |
| MFSD2B   | 0.477960708  | 9.42E-31 | 1.17E-28 |
| MFSD3    | 0.117792853  | 0.007451 | 0.013548 |
| MFSD4    | -0.37606661  | 9.56E-19 | 2.08E-17 |
| MFSD5    | 0.189783068  | 1.45E-05 | 4.25E-05 |
| MFSD6L   | -0.128259925 | 0.003549 | 0.006836 |
| MFSD6    | -0.150166459 | 0.000629 | 0.001386 |
| MFSD7    | -0.262829816 | 1.39E-09 | 7.52E-09 |
| MFSD8    | -0.034960332 | 0.428541 | 0.503094 |
| MFSD9    | 0.2061836    | 2.38E-06 | 7.84E-06 |
| MGAM     | -0.196034495 | 7.41E-06 | 2.26E-05 |
| MGAT1    | -0.180276307 | 3.87E-05 | 0.000105 |
| MGAT2    | 0.458510222  | 3.90E-28 | 3.22E-26 |
| MGAT3    | -0.32037621  | 9.33E-14 | 9.48E-13 |
| MGAT4A   | -0.045395998 | 0.303844 | 0.375632 |
| MGAT4B   | -0.04597911  | 0.297668 | 0.368933 |
| MGAT4C   | 0.039414602  | 0.372054 | 0.446912 |
| MGAT5B   | 0.066167013  | 0.133728 | 0.184227 |
| MGAT5    | -0.012696995 | 0.773766 | 0.818208 |
| MGA      | -0.032176935 | 0.466231 | 0.540045 |
| MGC12916 | -0.058549561 | 0.184638 | 0.244406 |
| MGC12982 | -0.006879137 | 0.876242 | 0.903312 |
| MGC14436 | 0.20745161   | 2.05E-06 | 6.84E-06 |
| MGC15885 | 0.013706934  | 0.756319 | 0.803428 |
| MGC16025 | 0.059507043  | 0.177548 | 0.236476 |
| MGC16121 | -0.093992295 | 0.03296  | 0.052381 |
| MGC16142 | -0.001068937 | 0.980694 | 0.985674 |
| MGC16275 | -0.147398769 | 0.000793 | 0.001717 |
| MGC16384 | -0.199809525 | 4.89E-06 | 1.53E-05 |
| MGC16703 | -0.26366491  | 1.23E-09 | 6.71E-09 |
| MGC21881 | -0.182922467 | 2.96E-05 | 8.22E-05 |
| MGC23270 | 0.010611127  | 0.810155 | 0.848226 |
| MGC23284 | -0.229349495 | 1.42E-07 | 5.71E-07 |
| MGC26647 | 0.012345195  | 0.779871 | 0.82285  |
| MGC27382 | -0.251678538 | 6.99E-09 | 3.42E-08 |
| MGC2752  | -0.12741018  | 0.003777 | 0.007241 |

|          |              |          |          |
|----------|--------------|----------|----------|
| MGC2889  | 0.035147628  | 0.42607  | 0.500746 |
| MGC29506 | 0.016170012  | 0.714299 | 0.767687 |
| MGC34034 | 0.171746773  | 8.96E-05 | 0.00023  |
| MGC3771  | -0.272111463 | 3.41E-10 | 2.03E-09 |
| MGC42105 | -0.159097564 | 0.000289 | 0.000678 |
| MGC4473  | 0.108331265  | 0.013905 | 0.023954 |
| MGC45800 | 0.100034559  | 0.023188 | 0.038131 |
| MGC57346 | -0.026031428 | 0.555585 | 0.625066 |
| MGC70857 | 0.070852741  | 0.10827  | 0.152617 |
| MGC72080 | 0.269885962  | 4.79E-10 | 2.79E-09 |
| MGC87042 | 0.342960488  | 1.16E-15 | 1.59E-14 |
| MGEA5    | -0.217012839 | 6.62E-07 | 2.39E-06 |
| MGLL     | -0.346604504 | 5.54E-16 | 7.97E-15 |
| MGMT     | -0.039458708 | 0.371518 | 0.44643  |
| MGP      | -0.374294338 | 1.43E-18 | 3.03E-17 |
| MGRN1    | -0.413815959 | 1.01E-22 | 3.93E-21 |
| MGST1    | 0.142640532  | 0.001171 | 0.002462 |
| MGST2    | -0.09852953  | 0.025352 | 0.041342 |
| MGST3    | 0.213441807  | 1.02E-06 | 3.57E-06 |
| MIA2     | 0.000954498  | 0.98276  | 0.987156 |
| MIA3     | -0.113186656 | 0.010151 | 0.018    |
| MIAT     | -0.040376319 | 0.36049  | 0.435245 |
| MIA      | -0.149151083 | 0.000685 | 0.001502 |
| MIB1     | 0.195703639  | 7.69E-06 | 2.34E-05 |
| MIB2     | -0.294712116 | 8.86E-12 | 6.68E-11 |
| MICAL1   | -0.370838233 | 3.10E-18 | 6.25E-17 |
| MICAL2   | -0.157267212 | 0.00034  | 0.000786 |
| MICAL3   | 0.026255159  | 0.552192 | 0.62206  |
| MICALCL  | -0.285623047 | 4.00E-11 | 2.73E-10 |
| MICALL1  | 0.072920099  | 0.098331 | 0.140138 |
| MICALL2  | -0.260318067 | 2.01E-09 | 1.06E-08 |
| MICA     | -0.116357726 | 0.008214 | 0.014821 |
| MICB     | 0.055185829  | 0.211199 | 0.274834 |
| MID1IP1  | -0.219750001 | 4.74E-07 | 1.76E-06 |
| MID1     | 0.028142087  | 0.523982 | 0.595957 |
| MID2     | -0.263041016 | 1.35E-09 | 7.30E-09 |
| MIDN     | -0.10111161  | 0.021739 | 0.035955 |
| MIER1    | 0.051438106  | 0.243917 | 0.311309 |
| MIER2    | -0.150344999 | 0.000619 | 0.001366 |
| MIER3    | 0.106777939  | 0.015341 | 0.026186 |
| MIF4GD   | -0.101644874 | 0.021051 | 0.034936 |
| MIF      | 0.26370846   | 1.22E-09 | 6.67E-09 |
| MIIP     | -0.099295921 | 0.024229 | 0.039657 |
| MIMT1    | -0.012640415 | 0.774747 | 0.819    |

|          |              |          |          |
|----------|--------------|----------|----------|
| MINA     | 0.290137956  | 1.90E-11 | 1.37E-10 |
| MINK1    | -0.192720767 | 1.06E-05 | 3.17E-05 |
| MINPP1   | 0.290986467  | 1.65E-11 | 1.20E-10 |
| MIOS     | -0.008273481 | 0.851424 | 0.882598 |
| MIOX     | 0.018983681  | 0.667341 | 0.72576  |
| MIPEP    | 0.080977566  | 0.066324 | 0.09866  |
| MIPOL1   | 0.223813443  | 2.87E-07 | 1.10E-06 |
| MIP      | 0.104398423  | 0.017793 | 0.029962 |
| MIR155HG | -0.131307583 | 0.002831 | 0.005552 |
| MIR17HG  | -0.139195852 | 0.001542 | 0.00317  |
| MIS12    | 0.158238414  | 0.000312 | 0.000726 |
| MITD1    | 0.154374221  | 0.000438 | 0.000994 |
| MITF     | -0.182358943 | 3.14E-05 | 8.66E-05 |
| MIXL1    | 0.01449364   | 0.742813 | 0.7919   |
| MKI67IP  | 0.458864005  | 3.51E-28 | 2.93E-26 |
| MKI67    | 0.416673791  | 4.79E-23 | 1.96E-21 |
| MKKS     | 0.215388498  | 8.05E-07 | 2.87E-06 |
| MKL1     | -0.08925619  | 0.042902 | 0.066567 |
| MKL2     | -0.180880877 | 3.64E-05 | 9.96E-05 |
| MKLN1    | -0.019603657 | 0.657159 | 0.716522 |
| MKNK1    | -0.285119098 | 4.34E-11 | 2.94E-10 |
| MKNK2    | -0.187183123 | 1.91E-05 | 5.47E-05 |
| MKRN1    | -0.13403511  | 0.002303 | 0.004593 |
| MKRN2    | 0.05016303   | 0.255819 | 0.324386 |
| MKRN3    | 0.129674457  | 0.003197 | 0.006212 |
| MKS1     | -0.130929031 | 0.002912 | 0.0057   |
| MKX      | 0.084763987  | 0.054557 | 0.082788 |
| MLANA    | -0.107917149 | 0.014276 | 0.024546 |
| MLC1     | -0.159328865 | 0.000283 | 0.000665 |
| MLEC     | 0.045371243  | 0.304108 | 0.375866 |
| MLF11P   | 0.425042911  | 5.22E-24 | 2.50E-22 |
| MLF1     | -0.012633775 | 0.774862 | 0.819078 |
| MLF2     | 0.27763948   | 1.44E-10 | 9.04E-10 |
| MLH1     | 0.032714906  | 0.458806 | 0.532618 |
| MLH3     | 0.012845253  | 0.771198 | 0.815981 |
| MLKL     | 0.109105848  | 0.013235 | 0.022894 |
| MLL2     | -0.151156853 | 0.000578 | 0.001282 |
| MLL3     | -0.217588397 | 6.17E-07 | 2.24E-06 |
| MLL4     | -0.139683474 | 0.001484 | 0.003061 |
| MLL5     | -0.230499031 | 1.23E-07 | 4.98E-07 |
| MLLT10   | -0.029592011 | 0.502817 | 0.575553 |
| MLLT11   | 0.298739093  | 4.46E-12 | 3.50E-11 |
| MLLT1    | -0.308151703 | 8.63E-13 | 7.62E-12 |
| MLLT3    | -0.131125635 | 0.00287  | 0.00562  |

|        |              |          |          |
|--------|--------------|----------|----------|
| MLLT4  | -0.329314225 | 1.72E-14 | 1.96E-13 |
| MLLT6  | -0.340342755 | 1.97E-15 | 2.61E-14 |
| MLL    | -0.207456309 | 2.05E-06 | 6.84E-06 |
| MLNR   | 0.06064344   | 0.169398 | 0.226865 |
| MLN    | 0.005994991  | 0.892044 | 0.915588 |
| MLPH   | -0.252071198 | 6.61E-09 | 3.24E-08 |
| MLST8  | 0.025516693  | 0.563431 | 0.632582 |
| MLXIPL | -0.236927827 | 5.29E-08 | 2.27E-07 |
| MLXIP  | -0.040552431 | 0.358398 | 0.432954 |
| MLX    | 0.094991487  | 0.031135 | 0.049783 |
| MLYCD  | -0.204656457 | 2.83E-06 | 9.22E-06 |
| MMAA   | -0.085637582 | 0.052104 | 0.079391 |
| MMAB   | 0.025491385  | 0.563818 | 0.632839 |
| MMACHC | 0.16597645   | 0.000154 | 0.000381 |
| MMADHC | 0.354923344  | 9.82E-17 | 1.56E-15 |
| MMD2   | 0.035133686  | 0.426254 | 0.500909 |
| MMD    | 0.24918451   | 9.94E-09 | 4.77E-08 |
| MMEL1  | -0.169159509 | 0.000115 | 0.000289 |
| MME    | -0.019563467 | 0.657817 | 0.717044 |
| MMGT1  | 0.055831678  | 0.205896 | 0.268826 |
| MMP10  | 0.111835303  | 0.011093 | 0.019504 |
| MMP11  | 0.094069152  | 0.032817 | 0.052196 |
| MMP12  | 0.261816695  | 1.61E-09 | 8.65E-09 |
| MMP13  | 0.003505543  | 0.936746 | 0.950296 |
| MMP14  | 0.167281978  | 0.000137 | 0.00034  |
| MMP15  | -0.174038207 | 7.18E-05 | 0.000187 |
| MMP16  | -0.012939939 | 0.769558 | 0.814678 |
| MMP17  | 0.08850687   | 0.044686 | 0.069083 |
| MMP19  | -0.275308952 | 2.07E-10 | 1.27E-09 |
| MMP1   | 0.235222177  | 6.63E-08 | 2.80E-07 |
| MMP20  | 0.042855341  | 0.331735 | 0.40535  |
| MMP21  | -0.244356249 | 1.94E-08 | 8.90E-08 |
| MMP23A | -0.081023357 | 0.066171 | 0.098446 |
| MMP23B | -0.261481466 | 1.69E-09 | 9.07E-09 |
| MMP24  | -0.299213717 | 4.11E-12 | 3.25E-11 |
| MMP25  | -0.103992484 | 0.018244 | 0.030659 |
| MMP26  | 0.05280988   | 0.231552 | 0.297676 |
| MMP27  | -0.076661884 | 0.082199 | 0.119456 |
| MMP28  | -0.295444749 | 7.82E-12 | 5.96E-11 |
| MMP2   | -0.110031389 | 0.012471 | 0.021674 |
| MMP3   | 0.077283175  | 0.07974  | 0.11633  |
| MMP7   | -0.118514178 | 0.007092 | 0.012948 |
| MMP8   | 0.07149067   | 0.105122 | 0.148598 |
| MMP9   | 0.037403727  | 0.396962 | 0.471869 |

|         |              |          |          |
|---------|--------------|----------|----------|
| MMRN1   | -0.248345519 | 1.12E-08 | 5.30E-08 |
| MMRN2   | -0.21625737  | 7.25E-07 | 2.60E-06 |
| MMS19   | 0.005821665  | 0.895147 | 0.918019 |
| MN1     | -0.012219148 | 0.782062 | 0.824769 |
| MNAT1   | 0.321487038  | 7.58E-14 | 7.83E-13 |
| MND1    | 0.43908695   | 1.10E-25 | 6.88E-24 |
| MNDA    | -0.217909752 | 5.94E-07 | 2.17E-06 |
| MNS1    | 0.039541023  | 0.370521 | 0.445311 |
| MNT     | -0.076252034 | 0.083854 | 0.121526 |
| MNX1    | -0.049500805 | 0.262156 | 0.331099 |
| MOAP1   | -0.268931623 | 5.55E-10 | 3.20E-09 |
| MOB2    | -0.235129959 | 6.71E-08 | 2.83E-07 |
| MOBKL1A | -0.033561089 | 0.447263 | 0.52155  |
| MOBKL1B | 0.282657462  | 6.46E-11 | 4.27E-10 |
| MOBKL2A | -0.113290278 | 0.010082 | 0.017887 |
| MOBKL2B | -0.159838744 | 0.000271 | 0.000638 |
| MOBKL2C | -0.375661862 | 1.05E-18 | 2.27E-17 |
| MOBKL3  | 0.31268665   | 3.82E-13 | 3.56E-12 |
| MOBP    | -0.098563665 | 0.025301 | 0.041266 |
| MOCOS   | 0.264542232  | 1.08E-09 | 5.95E-09 |
| MOCS1   | -0.428255044 | 2.19E-24 | 1.11E-22 |
| MOCS2   | -0.004734482 | 0.914645 | 0.933311 |
| MOCS3   | 0.205012137  | 2.72E-06 | 8.87E-06 |
| MOGAT1  | -0.005166217 | 0.906895 | 0.92726  |
| MOGAT2  | -0.163197006 | 0.0002   | 0.000483 |
| MOGAT3  | 0.104921404  | 0.017227 | 0.029072 |
| MOGS    | 0.015060746  | 0.733125 | 0.783872 |
| MOG     | -0.014131539 | 0.74902  | 0.797327 |
| MON1A   | -0.080360431 | 0.068427 | 0.10144  |
| MON1B   | 0.008736826  | 0.843208 | 0.875807 |
| MON2    | -0.096933925 | 0.027834 | 0.045001 |
| MORC1   | 0.029661439  | 0.501815 | 0.574682 |
| MORC2   | 0.035002398  | 0.427986 | 0.50256  |
| MORC3   | -0.23346162  | 8.35E-08 | 3.48E-07 |
| MORC4   | 0.109158871  | 0.01319  | 0.022826 |
| MORF4L1 | 0.134301887  | 0.002256 | 0.004506 |
| MORF4L2 | 0.340890976  | 1.77E-15 | 2.36E-14 |
| MORF4   | 0.097744284  | 0.026548 | 0.043118 |
| MORN1   | -0.264091185 | 1.15E-09 | 6.33E-09 |
| MORN2   | 0.091598655  | 0.037707 | 0.059192 |
| MORN3   | -0.229801212 | 1.34E-07 | 5.41E-07 |
| MORN4   | -0.190748898 | 1.31E-05 | 3.86E-05 |
| MORN5   | -0.194827486 | 8.45E-06 | 2.56E-05 |
| MOSC1   | 0.015219014  | 0.730429 | 0.781575 |

|           |              |          |          |
|-----------|--------------|----------|----------|
| MOSC2     | -0.291097903 | 1.62E-11 | 1.18E-10 |
| MOSPD1    | 0.151426588  | 0.000565 | 0.001254 |
| MOSPD2    | -0.037981385 | 0.389706 | 0.464487 |
| MOSPD3    | -0.05169937  | 0.241527 | 0.308713 |
| MOS       | 0.086291991  | 0.050327 | 0.076995 |
| MOV10L1   | 0.021034576  | 0.633901 | 0.695451 |
| MOV10     | -0.042892482 | 0.331316 | 0.404887 |
| MOXD1     | -0.211262339 | 1.32E-06 | 4.53E-06 |
| MPDU1     | 0.161639184  | 0.00023  | 0.00055  |
| MPDZ      | -0.185134064 | 2.36E-05 | 6.65E-05 |
| MPEG1     | -0.231993323 | 1.01E-07 | 4.16E-07 |
| MPG       | -0.053458937 | 0.225859 | 0.291144 |
| MPHOSPH10 | 0.201806772  | 3.91E-06 | 1.25E-05 |
| MPHOSPH6  | 0.277262075  | 1.53E-10 | 9.56E-10 |
| MPHOSPH8  | -0.232441347 | 9.54E-08 | 3.94E-07 |
| MPHOSPH9  | 0.276239626  | 1.79E-10 | 1.11E-09 |
| MPI       | -0.04972681  | 0.259981 | 0.328859 |
| MPL       | -0.294484202 | 9.20E-12 | 6.93E-11 |
| MPND      | -0.280253415 | 9.50E-11 | 6.14E-10 |
| MPO       | -0.020952631 | 0.635224 | 0.696634 |
| MPP1      | -0.045204927 | 0.305885 | 0.377623 |
| MPP2      | -0.005059383 | 0.908812 | 0.928654 |
| MPP3      | -0.121010041 | 0.005967 | 0.011048 |
| MPP4      | -0.016638616 | 0.706397 | 0.76116  |
| MPP5      | 0.144629453  | 0.000997 | 0.00212  |
| MPP6      | 0.268658547  | 5.78E-10 | 3.33E-09 |
| MPP7      | -0.024526905 | 0.578665 | 0.645913 |
| MPPE1     | -0.130564183 | 0.002993 | 0.005844 |
| MPPED1    | -0.142695813 | 0.001166 | 0.002451 |
| MPPED2    | -0.161299356 | 0.000237 | 0.000566 |
| MPRIP     | -0.295170568 | 8.20E-12 | 6.22E-11 |
| MPST      | -0.013007442 | 0.76839  | 0.813786 |
| MPV17L2   | 0.074895695  | 0.089525 | 0.128844 |
| MPV17L    | -0.104940933 | 0.017206 | 0.029044 |
| MPV17     | 0.0595917    | 0.176931 | 0.235829 |
| MPZL1     | 0.097430914  | 0.027039 | 0.04384  |
| MPZL2     | -0.226418751 | 2.07E-07 | 8.10E-07 |
| MPZL3     | -0.040029973 | 0.364629 | 0.43926  |
| MPZ       | -0.076095691 | 0.084493 | 0.122398 |
| MR1       | -0.212824223 | 1.09E-06 | 3.81E-06 |
| MRAP2     | -0.092230603 | 0.036401 | 0.057339 |
| MRAP      | -0.045574541 | 0.301944 | 0.37363  |
| MRAS      | -0.19107528  | 1.27E-05 | 3.73E-05 |
| MRC1      | -0.209803995 | 1.56E-06 | 5.30E-06 |



|          |              |          |          |
|----------|--------------|----------|----------|
| MRC2     | -0.241551314 | 2.84E-08 | 1.27E-07 |
| MRE11A   | 0.158739939  | 0.000299 | 0.000697 |
| MREG     | 0.006262251  | 0.887262 | 0.911617 |
| MRFAP1L1 | -0.036107224 | 0.413541 | 0.488237 |
| MRFAP1   | 0.080823586  | 0.066844 | 0.099344 |
| MRGPRD   | -0.023339896 | 0.597186 | 0.662829 |
| MRGPRE   | -0.146605394 | 0.000847 | 0.001824 |
| MRGPRF   | -0.086193472 | 0.050592 | 0.077346 |
| MRGPRX1  | 0.001877827  | 0.966091 | 0.974034 |
| MRGPRX2  | -0.166238187 | 0.000151 | 0.000373 |
| MRGPRX3  | 0.111037229  | 0.011685 | 0.020432 |
| MRGPRX4  | 0.14382627   | 0.001064 | 0.002251 |
| MRI1     | -0.187262129 | 1.89E-05 | 5.43E-05 |
| MRM1     | 0.083920425  | 0.057016 | 0.086062 |
| MRO      | 0.070403625  | 0.110531 | 0.155422 |
| MRP63    | 0.130294425  | 0.003053 | 0.005954 |
| MRPL10   | 0.221958253  | 3.61E-07 | 1.36E-06 |
| MRPL11   | 0.348046515  | 4.12E-16 | 6.03E-15 |
| MRPL12   | 0.366811903  | 7.58E-18 | 1.44E-16 |
| MRPL13   | 0.446202684  | 1.45E-26 | 1.01E-24 |
| MRPL14   | 0.103246055  | 0.019099 | 0.031959 |
| MRPL15   | 0.520535234  | 4.21E-37 | 1.79E-34 |
| MRPL16   | 0.235912166  | 6.05E-08 | 2.57E-07 |
| MRPL17   | 0.327423867  | 2.47E-14 | 2.74E-13 |
| MRPL18   | 0.175770027  | 6.06E-05 | 0.000159 |
| MRPL19   | 0.432940814  | 6.09E-25 | 3.38E-23 |
| MRPL1    | 0.326736647  | 2.81E-14 | 3.11E-13 |
| MRPL20   | 0.07384515   | 0.094125 | 0.134682 |
| MRPL21   | 0.373774414  | 1.61E-18 | 3.37E-17 |
| MRPL22   | 0.238303279  | 4.40E-08 | 1.91E-07 |
| MRPL23   | 0.038118656  | 0.387994 | 0.462777 |
| MRPL24   | 0.174934928  | 6.58E-05 | 0.000172 |
| MRPL27   | 0.216727304  | 6.85E-07 | 2.47E-06 |
| MRPL28   | 0.142420843  | 0.001192 | 0.002502 |
| MRPL2    | 0.200907407  | 4.32E-06 | 1.37E-05 |
| MRPL30   | 0.392856298  | 1.88E-20 | 5.22E-19 |
| MRPL32   | 0.238731717  | 4.16E-08 | 1.81E-07 |
| MRPL33   | 0.180331442  | 3.85E-05 | 0.000105 |
| MRPL34   | 0.099708205  | 0.023643 | 0.038783 |
| MRPL35   | 0.37185623   | 2.47E-18 | 5.04E-17 |
| MRPL36   | 0.229760446  | 1.35E-07 | 5.44E-07 |
| MRPL37   | 0.348318397  | 3.90E-16 | 5.73E-15 |
| MRPL38   | 0.06118212   | 0.165634 | 0.222419 |
| MRPL39   | 0.215746806  | 7.71E-07 | 2.75E-06 |

|          |              |          |          |
|----------|--------------|----------|----------|
| MRPL3    | 0.471795963  | 6.63E-30 | 7.13E-28 |
| MRPL40   | 0.094857447  | 0.031375 | 0.050142 |
| MRPL41   | 0.070933768  | 0.107866 | 0.15209  |
| MRPL42P5 | -0.179185237 | 4.32E-05 | 0.000117 |
| MRPL42   | 0.534579216  | 2.11E-39 | 1.57E-36 |
| MRPL43   | 0.145916837  | 0.000897 | 0.001921 |
| MRPL44   | 0.361884802  | 2.22E-17 | 3.91E-16 |
| MRPL45   | 0.340441571  | 1.93E-15 | 2.57E-14 |
| MRPL46   | 0.188072555  | 1.74E-05 | 5.02E-05 |
| MRPL47   | 0.350953516  | 2.26E-16 | 3.40E-15 |
| MRPL48   | 0.323684282  | 5.02E-14 | 5.32E-13 |
| MRPL49   | 0.147325186  | 0.000798 | 0.001727 |
| MRPL4    | 0.092181449  | 0.036501 | 0.057466 |
| MRPL50   | 0.288470741  | 2.51E-11 | 1.76E-10 |
| MRPL51   | 0.417605014  | 3.75E-23 | 1.58E-21 |
| MRPL52   | 0.363534035  | 1.55E-17 | 2.80E-16 |
| MRPL53   | 0.131615485  | 0.002766 | 0.005434 |
| MRPL54   | -0.00987471  | 0.823105 | 0.859168 |
| MRPL55   | -0.017626313 | 0.689846 | 0.746179 |
| MRPL9    | 0.323461282  | 5.23E-14 | 5.52E-13 |
| MRPS10   | 0.410027294  | 2.66E-22 | 9.71E-21 |
| MRPS11   | 0.282543568  | 6.58E-11 | 4.35E-10 |
| MRPS12   | 0.332812655  | 8.73E-15 | 1.04E-13 |
| MRPS14   | 0.231069412  | 1.14E-07 | 4.65E-07 |
| MRPS15   | 0.282959495  | 6.16E-11 | 4.08E-10 |
| MRPS16   | 0.412941918  | 1.26E-22 | 4.84E-21 |
| MRPS17   | 0.396183807  | 8.40E-21 | 2.47E-19 |
| MRPS18A  | 0.182372311  | 3.13E-05 | 8.65E-05 |
| MRPS18B  | 0.135049507  | 0.002131 | 0.004279 |
| MRPS18C  | 0.217544233  | 6.21E-07 | 2.26E-06 |
| MRPS21   | 0.069437407  | 0.115521 | 0.161742 |
| MRPS22   | 0.27482701   | 2.24E-10 | 1.37E-09 |
| MRPS23   | 0.288381169  | 2.55E-11 | 1.78E-10 |
| MRPS24   | 0.304505998  | 1.64E-12 | 1.39E-11 |
| MRPS25   | -0.22251601  | 3.37E-07 | 1.28E-06 |
| MRPS26   | 0.080182724  | 0.069042 | 0.102262 |
| MRPS27   | 0.136407623  | 0.001918 | 0.003878 |
| MRPS28   | 0.364533203  | 1.25E-17 | 2.29E-16 |
| MRPS2    | 0.273553532  | 2.73E-10 | 1.64E-09 |
| MRPS30   | 0.352878327  | 1.51E-16 | 2.34E-15 |
| MRPS31   | 0.046022077  | 0.297216 | 0.368512 |
| MRPS33   | 0.261964667  | 1.58E-09 | 8.49E-09 |
| MRPS34   | 0.110613527  | 0.012011 | 0.020943 |
| MRPS35   | 0.493256399  | 6.23E-33 | 1.15E-30 |

|        |              |          |          |
|--------|--------------|----------|----------|
| MRPS36 | 0.04060064   | 0.357826 | 0.432342 |
| MRPS5  | 0.264938311  | 1.01E-09 | 5.63E-09 |
| MRPS6  | 0.014956236  | 0.734907 | 0.785399 |
| MRPS7  | 0.238673651  | 4.19E-08 | 1.82E-07 |
| MRPS9  | 0.193228006  | 1.01E-05 | 3.01E-05 |
| MRRF   | 0.107710315  | 0.014465 | 0.024832 |
| MRS2P2 | 0.061434886  | 0.16389  | 0.220328 |
| MRS2   | 0.164503943  | 0.000177 | 0.000433 |
| MRT04  | 0.380103359  | 3.79E-19 | 8.82E-18 |
| MRVI1  | -0.210592281 | 1.42E-06 | 4.87E-06 |
| MS4A10 | -0.08166344  | 0.06405  | 0.09559  |
| MS4A12 | 0.037608024  | 0.394387 | 0.46931  |
| MS4A13 | 0.042446421  | 0.336374 | 0.410341 |
| MS4A14 | -0.28432278  | 4.94E-11 | 3.32E-10 |
| MS4A15 | -0.363116348 | 1.70E-17 | 3.06E-16 |
| MS4A1  | -0.212963811 | 1.08E-06 | 3.75E-06 |
| MS4A2  | -0.394686902 | 1.21E-20 | 3.45E-19 |
| MS4A3  | -0.053876771 | 0.222247 | 0.287099 |
| MS4A4A | -0.080417104 | 0.068232 | 0.101181 |
| MS4A5  | 0.11130207   | 0.011486 | 0.020135 |
| MS4A6A | -0.141023844 | 0.001334 | 0.002772 |
| MS4A6E | -0.03151362  | 0.475476 | 0.549195 |
| MS4A7  | -0.242819546 | 2.39E-08 | 1.08E-07 |
| MS4A8B | -0.234245578 | 7.53E-08 | 3.16E-07 |
| MSC    | 0.032605841  | 0.460306 | 0.534266 |
| MSGN1  | -0.014387952 | 0.744623 | 0.793522 |
| MSH2   | 0.30428759   | 1.71E-12 | 1.44E-11 |
| MSH3   | 0.018063013  | 0.682575 | 0.739514 |
| MSH4   | -0.056520117 | 0.200351 | 0.262494 |
| MSH5   | -0.093300545 | 0.034277 | 0.05428  |
| MSH6   | 0.27762804   | 1.44E-10 | 9.05E-10 |
| MSI1   | 0.106329786  | 0.015779 | 0.026858 |
| MSI2   | 0.100518677  | 0.022527 | 0.037132 |
| MSL1   | 0.05685224   | 0.197715 | 0.259466 |
| MSL2   | -0.188864455 | 1.60E-05 | 4.65E-05 |
| MSL3L2 | 0.11352265   | 0.009928 | 0.017647 |
| MSL3   | -0.086331009 | 0.050223 | 0.076865 |
| MSLNL  | 0.005142742  | 0.907316 | 0.927549 |
| MSLN   | -0.069917322 | 0.113021 | 0.158642 |
| MSMB   | 0.112689913  | 0.010489 | 0.018535 |
| MSMP   | -0.019730424 | 0.655084 | 0.714615 |
| MSN    | -0.177310226 | 5.21E-05 | 0.000139 |
| MSR1   | -0.092453154 | 0.03595  | 0.05671  |
| MSRA   | -0.218452029 | 5.56E-07 | 2.04E-06 |

|         |              |          |          |
|---------|--------------|----------|----------|
| MSRB2   | 0.030672212  | 0.487347 | 0.560702 |
| MSRB3   | -0.159826787 | 0.000271 | 0.000638 |
| MST1P2  | -0.33335943  | 7.84E-15 | 9.41E-14 |
| MST1P9  | -0.312623606 | 3.87E-13 | 3.60E-12 |
| MST1R   | -0.141740713 | 0.001259 | 0.002633 |
| MST1    | -0.197530768 | 6.29E-06 | 1.94E-05 |
| MST4    | 0.120557697  | 0.006158 | 0.011369 |
| MSTN    | -0.259079715 | 2.41E-09 | 1.26E-08 |
| MSTO1   | 0.027623469  | 0.531661 | 0.603178 |
| MSTO2P  | -0.217841558 | 5.99E-07 | 2.18E-06 |
| MSX1    | 0.117375092  | 0.007667 | 0.013912 |
| MSX2P1  | -0.166272493 | 0.00015  | 0.000372 |
| MSX2    | 0.000408262  | 0.992626 | 0.994633 |
| MT1A    | 0.076464133  | 0.082994 | 0.120472 |
| MT1B    | 0.134012499  | 0.002307 | 0.004599 |
| MT1DP   | -0.064152533 | 0.145998 | 0.199107 |
| MT1E    | -0.06552885  | 0.137525 | 0.188847 |
| MT1F    | -0.06208396  | 0.159474 | 0.215129 |
| MT1G    | 0.169219656  | 0.000114 | 0.000287 |
| MT1H    | 0.262459379  | 1.47E-09 | 7.92E-09 |
| MT1IP   | -0.113254088 | 0.010106 | 0.017927 |
| MT1L    | 0.057196733  | 0.195007 | 0.256283 |
| MT1M    | -0.065593899 | 0.137135 | 0.188388 |
| MT1X    | 0.178622561  | 4.57E-05 | 0.000123 |
| MT2A    | 0.149368648  | 0.000672 | 0.001476 |
| MT3     | -0.091213472 | 0.038523 | 0.060363 |
| MTA1    | 0.063821188  | 0.148096 | 0.201549 |
| MTA2    | 0.244107871  | 2.01E-08 | 9.19E-08 |
| MTA3    | 0.185703946  | 2.23E-05 | 6.30E-05 |
| MTAP    | 0.10135284   | 0.021426 | 0.035496 |
| MTBP    | 0.364993117  | 1.13E-17 | 2.09E-16 |
| MTCH1   | 0.028037686  | 0.525523 | 0.597506 |
| MTCH2   | 0.415461747  | 6.56E-23 | 2.65E-21 |
| MTCP1NB | 0.000878644  | 0.98413  | 0.988283 |
| MTCP1   | -0.139190659 | 0.001543 | 0.003171 |
| MTDH    | 0.378975826  | 4.92E-19 | 1.12E-17 |
| MTERFD1 | 0.369735014  | 3.97E-18 | 7.88E-17 |
| MTERFD2 | -0.053379463 | 0.226551 | 0.291941 |
| MTERFD3 | -0.104986994 | 0.017157 | 0.028973 |
| MTERF   | 0.283537891  | 5.61E-11 | 3.74E-10 |
| MTF1    | -0.152930238 | 0.000497 | 0.001113 |
| MTF2    | 0.083122645  | 0.059425 | 0.089342 |
| MTFMT   | 0.020126757  | 0.648616 | 0.708716 |
| MTFR1   | 0.481350661  | 3.16E-31 | 4.40E-29 |

|         |              |          |          |
|---------|--------------|----------|----------|
| MTG1    | 0.086624528  | 0.049444 | 0.075737 |
| MTHFD1L | 0.281601986  | 7.66E-11 | 5.01E-10 |
| MTHFD1  | 0.395023348  | 1.11E-20 | 3.20E-19 |
| MTHFD2L | 0.087337682  | 0.047594 | 0.073093 |
| MTHFD2  | 0.549524444  | 5.72E-42 | 7.14E-39 |
| MTHFR   | -0.2349561   | 6.86E-08 | 2.90E-07 |
| MTHFSD  | -0.158854958 | 0.000295 | 0.000691 |
| MTHFS   | 0.161436252  | 0.000234 | 0.000559 |
| MTIF2   | 0.334480759  | 6.30E-15 | 7.72E-14 |
| MTIF3   | -0.048539107 | 0.27155  | 0.341497 |
| MTL5    | 0.387909042  | 6.13E-20 | 1.58E-18 |
| MTM1    | -0.22177314  | 3.69E-07 | 1.39E-06 |
| MTMR10  | -0.321281985 | 7.88E-14 | 8.10E-13 |
| MTMR11  | 0.131850149  | 0.002718 | 0.005351 |
| MTMR12  | -0.156539009 | 0.000363 | 0.000833 |
| MTMR14  | -0.185809845 | 2.20E-05 | 6.24E-05 |
| MTMR15  | -0.117665473 | 0.007516 | 0.013658 |
| MTMR1   | -0.146147505 | 0.00088  | 0.001889 |
| MTMR2   | 0.351005221  | 2.23E-16 | 3.37E-15 |
| MTMR3   | -0.344066838 | 9.30E-16 | 1.29E-14 |
| MTMR4   | -0.023259083 | 0.598457 | 0.663954 |
| MTMR6   | 0.031316264  | 0.478246 | 0.552075 |
| MTMR7   | 0.096325216  | 0.028835 | 0.046457 |
| MTMR8   | -0.229023602 | 1.48E-07 | 5.93E-07 |
| MTMR9L  | -0.263211133 | 1.31E-09 | 7.13E-09 |
| MTMR9   | -0.092040382 | 0.03679  | 0.057875 |
| MTNR1A  | 0.017715653  | 0.688356 | 0.74493  |
| MTNR1B  | 0.036367261  | 0.410183 | 0.484817 |
| MTO1    | -0.005954962 | 0.89276  | 0.916169 |
| MTOR    | -0.043507906 | 0.324418 | 0.397461 |
| MTP18   | 0.300289294  | 3.42E-12 | 2.73E-11 |
| MTPAP   | 0.349151193  | 3.28E-16 | 4.88E-15 |
| MTRF1L  | 0.259963648  | 2.12E-09 | 1.11E-08 |
| MTRF1   | -0.043244671 | 0.327357 | 0.400662 |
| MTRR    | -0.145668915 | 0.000915 | 0.001958 |
| MTR     | -0.309909305 | 6.30E-13 | 5.70E-12 |
| MTSS1L  | -0.279466203 | 1.08E-10 | 6.89E-10 |
| MTSS1   | -0.206608288 | 2.26E-06 | 7.49E-06 |
| MTTP    | -0.038417061 | 0.384287 | 0.458931 |
| MTUS1   | -0.210193571 | 1.49E-06 | 5.08E-06 |
| MTUS2   | -0.099055356 | 0.024577 | 0.040183 |
| MTVR2   | -0.228232247 | 1.64E-07 | 6.52E-07 |
| MTX1    | 0.248947249  | 1.03E-08 | 4.91E-08 |
| MTX2    | 0.146917884  | 0.000825 | 0.001782 |

|         |              |          |          |
|---------|--------------|----------|----------|
| MTX3    | -0.235509645 | 6.38E-08 | 2.70E-07 |
| MUC12   | 0.000861302  | 0.984443 | 0.9883   |
| MUC13   | 0.21297646   | 1.07E-06 | 3.75E-06 |
| MUC15   | -0.280391626 | 9.29E-11 | 6.01E-10 |
| MUC16   | 0.076936468  | 0.081105 | 0.118063 |
| MUC17   | -0.016092482 | 0.71561  | 0.768598 |
| MUC1    | -0.281050904 | 8.36E-11 | 5.45E-10 |
| MUC20   | -0.180817081 | 3.67E-05 | 0.0001   |
| MUC21   | -0.241933825 | 2.70E-08 | 1.21E-07 |
| MUC2    | 0.139226888  | 0.001538 | 0.003164 |
| MUC4    | 0.040671581  | 0.356986 | 0.431509 |
| MUC5B   | 0.036747796  | 0.405299 | 0.480066 |
| MUC6    | -0.022571573 | 0.609315 | 0.673729 |
| MUC7    | -0.042989846 | 0.330218 | 0.40367  |
| MUCL1   | 0.160269147  | 0.00026  | 0.000615 |
| MUDENG  | 0.293466239  | 1.09E-11 | 8.12E-11 |
| MUL1    | -0.046018474 | 0.297254 | 0.368512 |
| MUM1L1  | -0.076035062 | 0.084742 | 0.122705 |
| MUM1    | -0.302925412 | 2.16E-12 | 1.79E-11 |
| MURC    | 0.200517878  | 4.52E-06 | 1.43E-05 |
| MUS81   | 0.033086095  | 0.453722 | 0.527828 |
| MUSK    | -0.363964672 | 1.41E-17 | 2.57E-16 |
| MUSTN1  | -0.434328075 | 4.15E-25 | 2.37E-23 |
| MUTED   | 0.187891334  | 1.77E-05 | 5.11E-05 |
| MUTYH   | -0.109785773 | 0.01267  | 0.02199  |
| MUT     | 0.023023028  | 0.602175 | 0.667347 |
| MVD     | -0.049918495 | 0.258146 | 0.326902 |
| MVK     | -0.074369848 | 0.091805 | 0.131701 |
| MVP     | -0.310380649 | 5.79E-13 | 5.27E-12 |
| MX1     | -0.190102748 | 1.40E-05 | 4.12E-05 |
| MX2     | -0.127776134 | 0.003678 | 0.007062 |
| MXD1    | 0.107565606  | 0.014598 | 0.025052 |
| MXD3    | 0.069360307  | 0.115926 | 0.16223  |
| MXD4    | -0.270830275 | 4.15E-10 | 2.44E-09 |
| MXI1    | 0.02417932   | 0.584061 | 0.650845 |
| MXRA5   | 0.103924671  | 0.01832  | 0.030774 |
| MXRA7   | -0.049042502 | 0.266605 | 0.336123 |
| MXRA8   | -0.092714224 | 0.035427 | 0.055965 |
| MYADML2 | 0.06355473   | 0.1498   | 0.20359  |
| MYADML  | 0.055791914  | 0.20622  | 0.269178 |
| MYADM   | -0.098230517 | 0.025802 | 0.042011 |
| MYBBP1A | 0.039212401  | 0.374514 | 0.449407 |
| MYBL1   | 0.212620519  | 1.12E-06 | 3.89E-06 |
| MYBL2   | 0.448704841  | 7.04E-27 | 5.06E-25 |

|         |              |          |          |
|---------|--------------|----------|----------|
| MYBPC1  | -0.013926813 | 0.752536 | 0.800345 |
| MYBPC2  | -0.263982721 | 1.17E-09 | 6.43E-09 |
| MYBPC3  | -0.226345227 | 2.08E-07 | 8.16E-07 |
| MYBPHL  | -0.361384405 | 2.47E-17 | 4.34E-16 |
| MYBPH   | -0.161979654 | 0.000223 | 0.000535 |
| MYB     | 0.039999383  | 0.364995 | 0.43965  |
| MYCBP2  | -0.232317688 | 9.69E-08 | 4.00E-07 |
| MYCBPAP | -0.277335134 | 1.51E-10 | 9.46E-10 |
| MYCBP   | 0.166572528  | 0.000146 | 0.000362 |
| MYCL1   | -0.078037729 | 0.076835 | 0.112577 |
| MYCNOS  | 0.152169468  | 0.00053  | 0.001183 |
| MYCN    | 0.088334742  | 0.045104 | 0.069676 |
| MYCT1   | -0.154654254 | 0.000428 | 0.000972 |
| MYC     | 0.217652996  | 6.12E-07 | 2.23E-06 |
| MYD88   | -0.092470104 | 0.035916 | 0.056665 |
| MYEF2   | -0.177778575 | 4.97E-05 | 0.000133 |
| MYEOV2  | 0.165790146  | 0.000157 | 0.000387 |
| MYEOV   | 0.378277912  | 5.77E-19 | 1.30E-17 |
| MYF5    | -0.016133897 | 0.71491  | 0.768011 |
| MYF6    | 0.075718243  | 0.08605  | 0.124384 |
| MYH10   | -0.248550732 | 1.09E-08 | 5.17E-08 |
| MYH11   | -0.348152655 | 4.03E-16 | 5.92E-15 |
| MYH13   | 0.108702087  | 0.013581 | 0.023443 |
| MYH14   | -0.266315528 | 8.24E-10 | 4.64E-09 |
| MYH15   | -0.085291141 | 0.053066 | 0.080715 |
| MYH16   | 0.314068395  | 2.98E-13 | 2.82E-12 |
| MYH1    | -0.302961314 | 2.15E-12 | 1.78E-11 |
| MYH2    | -0.270194627 | 4.57E-10 | 2.67E-09 |
| MYH3    | -0.291653915 | 1.48E-11 | 1.08E-10 |
| MYH4    | -0.099848778 | 0.023446 | 0.038498 |
| MYH6    | 0.053666823  | 0.224057 | 0.289206 |
| MYH7B   | -0.309944458 | 6.26E-13 | 5.67E-12 |
| MYH7    | -0.044438579 | 0.314166 | 0.38641  |
| MYH8    | -0.030162296 | 0.494617 | 0.567917 |
| MYH9    | -0.121484742 | 0.005772 | 0.010712 |
| MYL10   | 0.08417625   | 0.056261 | 0.085051 |
| MYL12A  | 0.057530542  | 0.19241  | 0.253352 |
| MYL12B  | 0.08981831   | 0.041603 | 0.064763 |
| MYL1    | 0.038726372  | 0.380468 | 0.455104 |
| MYL2    | -0.009706826 | 0.826064 | 0.861553 |
| MYL3    | -0.245163504 | 1.74E-08 | 8.01E-08 |
| MYL4    | -0.026205444 | 0.552945 | 0.622803 |
| MYL5    | -0.302666128 | 2.26E-12 | 1.87E-11 |
| MYL6B   | 0.33854884   | 2.82E-15 | 3.66E-14 |

|        |              |          |          |
|--------|--------------|----------|----------|
| MYL6   | 0.169691133  | 0.000109 | 0.000276 |
| MYL7   | 0.05532943   | 0.210011 | 0.273502 |
| MYL9   | -0.176987977 | 5.38E-05 | 0.000143 |
| MYLIP  | -0.291465214 | 1.53E-11 | 1.11E-10 |
| MYLK2  | 0.164043072  | 0.000185 | 0.00045  |
| MYLK3  | -0.105882385 | 0.016227 | 0.027542 |
| MYLK4  | -0.274884601 | 2.22E-10 | 1.35E-09 |
| MYLK   | -0.16132631  | 0.000237 | 0.000564 |
| MYLPF  | -0.137099666 | 0.001818 | 0.003691 |
| MYNN   | 0.208737105  | 1.77E-06 | 5.97E-06 |
| MYO10  | -0.01119421  | 0.799938 | 0.839811 |
| MYO15A | -0.346680055 | 5.46E-16 | 7.87E-15 |
| MYO15B | -0.325407231 | 3.62E-14 | 3.94E-13 |
| MYO16  | 0.01119839   | 0.799865 | 0.839778 |
| MYO18A | -0.224277715 | 2.70E-07 | 1.04E-06 |
| MYO18B | 0.040217373  | 0.362386 | 0.436979 |
| MYO19  | 0.218537647  | 5.50E-07 | 2.02E-06 |
| MYO1A  | -0.109843765 | 0.012622 | 0.021916 |
| MYO1B  | -0.113025972 | 0.010259 | 0.018174 |
| MYO1C  | -0.138435763 | 0.001637 | 0.00335  |
| MYO1D  | -0.217381994 | 6.33E-07 | 2.30E-06 |
| MYO1E  | 0.175271985  | 6.36E-05 | 0.000167 |
| MYO1F  | -0.302163711 | 2.47E-12 | 2.02E-11 |
| MYO1G  | -0.234913868 | 6.90E-08 | 2.91E-07 |
| MYO1H  | -0.115392764 | 0.008765 | 0.015714 |
| MYO3A  | -0.168064443 | 0.000127 | 0.000318 |
| MYO3B  | -0.059505674 | 0.177558 | 0.236476 |
| MYO5A  | -0.097136219 | 0.027508 | 0.044525 |
| MYO5B  | -0.015746927 | 0.72146  | 0.773717 |
| MYO5C  | -0.199226748 | 5.22E-06 | 1.63E-05 |
| MYO6   | -0.234044022 | 7.74E-08 | 3.23E-07 |
| MYO7A  | 0.014882365  | 0.736168 | 0.786399 |
| MYO7B  | -0.12772712  | 0.003691 | 0.007086 |
| MYO9A  | -0.242308486 | 2.57E-08 | 1.15E-07 |
| MYO9B  | -0.279506315 | 1.07E-10 | 6.85E-10 |
| MYOCD  | -0.333593394 | 7.49E-15 | 9.02E-14 |
| MYOC   | -0.431475878 | 9.12E-25 | 4.90E-23 |
| MYOD1  | 0.045268901  | 0.305201 | 0.376957 |
| MYOF   | -0.124523038 | 0.004654 | 0.008795 |
| MYOG   | -0.079586519 | 0.07114  | 0.105027 |
| MYOM1  | -0.136144133 | 0.001958 | 0.003955 |
| MYOM2  | -0.299718357 | 3.77E-12 | 3.00E-11 |
| MYOM3  | 0.043155825  | 0.328353 | 0.401733 |
| MYOT   | -0.09502656  | 0.031073 | 0.049695 |



|          |              |          |          |
|----------|--------------|----------|----------|
| MYOZ1    | -0.340494755 | 1.91E-15 | 2.54E-14 |
| MYOZ2    | -0.098351263 | 0.025619 | 0.041744 |
| MYOZ3    | -0.23053223  | 1.22E-07 | 4.97E-07 |
| MYPN     | 0.098590464  | 0.025261 | 0.041204 |
| MYPOP    | 0.063722547  | 0.148725 | 0.202267 |
| MYRIP    | -0.23893311  | 4.05E-08 | 1.77E-07 |
| MYSM1    | -0.146552356 | 0.000851 | 0.001831 |
| MYST1    | -0.214098519 | 9.40E-07 | 3.32E-06 |
| MYST2    | -0.183413197 | 2.82E-05 | 7.83E-05 |
| MYST3    | 0.013723937  | 0.756026 | 0.803169 |
| MYST4    | -0.188105418 | 1.73E-05 | 5.01E-05 |
| MYT1L    | 0.009829559  | 0.8239   | 0.859819 |
| MYT1     | -0.028765472 | 0.514826 | 0.587181 |
| MZF1     | -0.336601305 | 4.15E-15 | 5.22E-14 |
| N4BP1    | -0.317391441 | 1.62E-13 | 1.59E-12 |
| N4BP2L1  | -0.464965907 | 5.51E-29 | 5.19E-27 |
| N4BP2L2  | -0.283636855 | 5.52E-11 | 3.68E-10 |
| N4BP2    | 0.157231785  | 0.000341 | 0.000788 |
| N4BP3    | -0.22042622  | 4.36E-07 | 1.63E-06 |
| N6AMT1   | -0.161438439 | 0.000234 | 0.000559 |
| N6AMT2   | 0.104878781  | 0.017272 | 0.029141 |
| NAA10    | 0.272521833  | 3.20E-10 | 1.91E-09 |
| NAA11    | 0.081911811  | 0.063243 | 0.094512 |
| NAA15    | 0.442971892  | 3.66E-26 | 2.43E-24 |
| NAA16    | -0.216432185 | 7.10E-07 | 2.55E-06 |
| NAA20    | 0.300357381  | 3.38E-12 | 2.70E-11 |
| NAA25    | 0.346568352  | 5.58E-16 | 8.03E-15 |
| NAA30    | 0.331657128  | 1.09E-14 | 1.28E-13 |
| NAA35    | 0.314689644  | 2.66E-13 | 2.54E-12 |
| NAA38    | 0.240348559  | 3.35E-08 | 1.48E-07 |
| NAA40    | -0.047051232 | 0.286533 | 0.357504 |
| NAA50    | 0.393070551  | 1.79E-20 | 4.97E-19 |
| NAAA     | -0.13895622  | 0.001572 | 0.003224 |
| NAALAD2  | -0.255653845 | 3.96E-09 | 2.00E-08 |
| NAALADL1 | -0.233716522 | 8.07E-08 | 3.37E-07 |
| NAALADL2 | -0.125907309 | 0.004213 | 0.008011 |
| NAB1     | 0.092403934  | 0.036049 | 0.056848 |
| NAB2     | -0.165984129 | 0.000154 | 0.000381 |
| NACA2    | 0.166794788  | 0.000143 | 0.000355 |
| NACAD    | -0.169665475 | 0.000109 | 0.000276 |
| NACAP1   | 0.145882237  | 0.000899 | 0.001926 |
| NACA     | 0.235180909  | 6.66E-08 | 2.81E-07 |
| NACC1    | 0.066584097  | 0.131289 | 0.18113  |
| NACC2    | -0.031258078 | 0.479065 | 0.552924 |

|         |              |          |          |
|---------|--------------|----------|----------|
| NADK    | -0.046402257 | 0.293239 | 0.364507 |
| NADSYN1 | -0.187011477 | 1.94E-05 | 5.56E-05 |
| NAE1    | 0.273774505  | 2.63E-10 | 1.59E-09 |
| NAF1    | 0.183282943  | 2.85E-05 | 7.93E-05 |
| NAGA    | -0.177246525 | 5.24E-05 | 0.000139 |
| NAGK    | -0.154241979 | 0.000443 | 0.001004 |
| NAGLU   | -0.165254648 | 0.000165 | 0.000405 |
| NAGPA   | -0.143998516 | 0.001049 | 0.002223 |
| NAGS    | -0.100074913 | 0.023132 | 0.038048 |
| NAIF1   | 0.108451014  | 0.0138   | 0.023795 |
| NAIP    | -0.275568379 | 1.99E-10 | 1.22E-09 |
| NALCN   | -0.213544923 | 1.00E-06 | 3.53E-06 |
| NAMPT   | 0.396408403  | 7.95E-21 | 2.35E-19 |
| NANOG   | -0.156722754 | 0.000357 | 0.000822 |
| NANOS1  | -0.04169356  | 0.345022 | 0.419228 |
| NANOS2  | 0.016162022  | 0.714434 | 0.767687 |
| NANOS3  | 0.020232998  | 0.646887 | 0.707213 |
| NANP    | 0.208121312  | 1.90E-06 | 6.38E-06 |
| NANS    | 0.163122804  | 0.000201 | 0.000486 |
| NAP1L1  | 0.109390612  | 0.012995 | 0.022519 |
| NAP1L2  | -0.261374768 | 1.72E-09 | 9.20E-09 |
| NAP1L3  | -0.202034801 | 3.81E-06 | 1.22E-05 |
| NAP1L4  | 0.001841258  | 0.966751 | 0.974503 |
| NAP1L5  | -0.249516942 | 9.48E-09 | 4.56E-08 |
| NAP1L6  | -0.040316123 | 0.361208 | 0.435927 |
| NAPA    | -0.359823349 | 3.46E-17 | 5.97E-16 |
| NAPB    | -0.208981754 | 1.72E-06 | 5.81E-06 |
| NAPEPLD | -0.03614383  | 0.413067 | 0.487764 |
| NAPG    | 0.038561451  | 0.382501 | 0.457077 |
| NAPRT1  | -0.128482787 | 0.003492 | 0.006735 |
| NAPSA   | -0.340255773 | 2.01E-15 | 2.66E-14 |
| NAPSB   | -0.399003276 | 4.21E-21 | 1.30E-19 |
| NARFL   | -0.148171852 | 0.000743 | 0.00162  |
| NARF    | 0.069595408  | 0.114693 | 0.160729 |
| NARG2   | 0.010636586  | 0.809708 | 0.847888 |
| NARS2   | 0.247578265  | 1.24E-08 | 5.86E-08 |
| NARS    | 0.284080255  | 5.14E-11 | 3.44E-10 |
| NASP    | -0.014718137 | 0.738973 | 0.788758 |
| NAT10   | 0.140608713  | 0.001379 | 0.00286  |
| NAT14   | -0.152660926 | 0.000508 | 0.001138 |
| NAT15   | -0.266552036 | 7.95E-10 | 4.49E-09 |
| NAT1    | 0.018526252  | 0.674893 | 0.732622 |
| NAT2    | 0.002013547  | 0.963642 | 0.971993 |
| NAT6    | -0.25886847  | 2.49E-09 | 1.29E-08 |

|           |              |          |          |
|-----------|--------------|----------|----------|
| NAT8B     | 0.004047831  | 0.926986 | 0.942932 |
| NAT8L     | 0.163816502  | 0.000189 | 0.000458 |
| NAT8      | -0.077366416 | 0.079416 | 0.115925 |
| NAT9      | 0.061357197  | 0.164425 | 0.220928 |
| NAV1      | 0.130975066  | 0.002902 | 0.005682 |
| NAV2      | -0.065103023 | 0.140106 | 0.191915 |
| NAV3      | -0.042260188 | 0.3385   | 0.412582 |
| NBAS      | -0.04452773  | 0.313195 | 0.385287 |
| NBEAL1    | -0.234367928 | 7.41E-08 | 3.11E-07 |
| NBEAL2    | -0.250199566 | 8.62E-09 | 4.17E-08 |
| NBEA      | -0.204174817 | 2.99E-06 | 9.70E-06 |
| NBL1      | -0.055414732 | 0.209308 | 0.272657 |
| NBLA00301 | -0.150261875 | 0.000624 | 0.001376 |
| NBN       | 0.362699464  | 1.86E-17 | 3.32E-16 |
| NBPF10    | -0.215687483 | 7.77E-07 | 2.77E-06 |
| NBPF14    | -0.236692388 | 5.46E-08 | 2.33E-07 |
| NBPF15    | -0.112570822 | 0.010571 | 0.018672 |
| NBPF16    | -0.105072089 | 0.017066 | 0.028843 |
| NBPF1     | -0.238638756 | 4.21E-08 | 1.83E-07 |
| NBPF22P   | 0.105332903  | 0.016792 | 0.028417 |
| NBPF3     | -0.25399149  | 5.03E-09 | 2.51E-08 |
| NBPF4     | 0.168650718  | 0.00012  | 0.000302 |
| NBPF6     | 0.131646327  | 0.00276  | 0.005424 |
| NBPF7     | -0.160285167 | 0.00026  | 0.000615 |
| NBPF9     | -0.195341876 | 7.99E-06 | 2.43E-05 |
| NBR1      | -0.161083227 | 0.000242 | 0.000576 |
| NBR2      | -0.184179881 | 2.60E-05 | 7.29E-05 |
| NCALD     | -0.305204883 | 1.45E-12 | 1.24E-11 |
| NCAM1     | -0.169692314 | 0.000109 | 0.000276 |
| NCAM2     | -0.231863878 | 1.03E-07 | 4.22E-07 |
| NCAN      | -0.04579997  | 0.299556 | 0.371021 |
| NCAPD2    | 0.393505186  | 1.61E-20 | 4.49E-19 |
| NCAPD3    | 0.253033934  | 5.77E-09 | 2.85E-08 |
| NCAPG2    | 0.411458166  | 1.85E-22 | 6.88E-21 |
| NCAPG     | 0.530877898  | 8.74E-39 | 5.46E-36 |
| NCAPH2    | -0.108932944 | 0.013382 | 0.02312  |
| NCAPH     | 0.48378139   | 1.44E-31 | 2.11E-29 |
| NCBP1     | 0.319405715  | 1.12E-13 | 1.13E-12 |
| NCBP2     | 0.189633403  | 1.48E-05 | 4.31E-05 |
| NCCRP1    | -0.005307538 | 0.90436  | 0.925047 |
| NCDN      | -0.292863761 | 1.21E-11 | 8.93E-11 |
| NCEH1     | 0.012572436  | 0.775926 | 0.819663 |
| NCF1B     | -0.167276754 | 0.000137 | 0.00034  |
| NCF1C     | -0.170860864 | 9.75E-05 | 0.000249 |

|            |              |          |          |
|------------|--------------|----------|----------|
| NCF1       | -0.168714961 | 0.00012  | 0.0003   |
| NCF2       | -0.162684416 | 0.000209 | 0.000505 |
| NCF4       | -0.293990981 | 1.00E-11 | 7.48E-11 |
| NCK1       | 0.204079153  | 3.02E-06 | 9.80E-06 |
| NCK2       | -0.059894007 | 0.174741 | 0.233159 |
| NCKAP1L    | -0.228532149 | 1.58E-07 | 6.29E-07 |
| NCKAP1     | 0.291405648  | 1.54E-11 | 1.12E-10 |
| NCKAP5L    | -0.301757437 | 2.65E-12 | 2.16E-11 |
| NCKAP5     | -0.150160595 | 0.000629 | 0.001386 |
| NCKIPSD    | -0.058040833 | 0.188488 | 0.248927 |
| NCLN       | 0.081591093  | 0.064287 | 0.095886 |
| NCL        | 0.247753267  | 1.21E-08 | 5.73E-08 |
| NCOA1      | -0.142814398 | 0.001155 | 0.00243  |
| NCOA2      | -0.092768103 | 0.03532  | 0.055818 |
| NCOA3      | 0.060521141  | 0.170262 | 0.227903 |
| NCOA4      | 0.035114047  | 0.426513 | 0.50114  |
| NCOA5      | 0.040856283  | 0.354805 | 0.429392 |
| NCOA6      | 0.038016768  | 0.389264 | 0.464126 |
| NCOA7      | -0.159798525 | 0.000272 | 0.00064  |
| NCOR1      | -0.052125448 | 0.237665 | 0.304321 |
| NCOR2      | -0.161581962 | 0.000231 | 0.000553 |
| NCR1       | 0.054960338  | 0.213073 | 0.276948 |
| NCR2       | 0.009536592  | 0.829067 | 0.863948 |
| NCR3       | -0.188536907 | 1.66E-05 | 4.80E-05 |
| NCRNA00028 | -0.017707617 | 0.68849  | 0.745035 |
| NCRNA00029 | 0.005402285  | 0.902661 | 0.92384  |
| NCRNA00032 | -0.162090504 | 0.000221 | 0.00053  |
| NCRNA00051 | 0.015321492  | 0.728685 | 0.780168 |
| NCRNA00052 | 0.132872126  | 0.002516 | 0.004982 |
| NCRNA00081 | 0.016779414  | 0.704029 | 0.759138 |
| NCRNA00085 | -0.311283341 | 4.93E-13 | 4.51E-12 |
| NCRNA00086 | -0.175191462 | 6.41E-05 | 0.000168 |
| NCRNA00087 | -0.325695607 | 3.43E-14 | 3.75E-13 |
| NCRNA00092 | -0.34528531  | 7.26E-16 | 1.02E-14 |
| NCRNA00093 | -0.109457256 | 0.01294  | 0.02243  |
| NCRNA00094 | -0.159842574 | 0.00027  | 0.000638 |
| NCRNA00095 | 0.015292589  | 0.729177 | 0.780569 |
| NCRNA00099 | -0.018348583 | 0.677835 | 0.735257 |
| NCRNA00105 | -0.257981751 | 2.83E-09 | 1.46E-08 |
| NCRNA00107 | -0.243254659 | 2.26E-08 | 1.02E-07 |
| NCRNA00110 | -0.160511083 | 0.000255 | 0.000603 |
| NCRNA00111 | -0.074463822 | 0.091394 | 0.131243 |
| NCRNA00112 | 0.020779039  | 0.638029 | 0.699288 |
| NCRNA00113 | -0.13441186  | 0.002237 | 0.004472 |

|             |              |          |          |
|-------------|--------------|----------|----------|
| NCRNA00114  | -0.084731909 | 0.054649 | 0.082909 |
| NCRNA00115  | -0.212275441 | 1.17E-06 | 4.05E-06 |
| NCRNA00116  | 0.087801391  | 0.046422 | 0.071519 |
| NCRNA00119  | 0.100325668  | 0.022788 | 0.037526 |
| NCRNA00120  | -0.029840667 | 0.499233 | 0.572237 |
| NCRNA00152  | 0.265960413  | 8.69E-10 | 4.88E-09 |
| NCRNA00157  | 0.004342223  | 0.921693 | 0.938741 |
| NCRNA00158  | -0.010368676 | 0.814413 | 0.852053 |
| NCRNA00159  | -0.008677645 | 0.844256 | 0.876669 |
| NCRNA00160  | -0.033973157 | 0.441702 | 0.516029 |
| NCRNA00161  | -0.120985924 | 0.005977 | 0.011065 |
| NCRNA00162  | 0.057352619  | 0.193791 | 0.254864 |
| NCRNA00164  | -0.019350273 | 0.661313 | 0.720199 |
| NCRNA00167  | -0.045418941 | 0.303599 | 0.375376 |
| NCRNA00169  | -0.147877269 | 0.000762 | 0.001656 |
| NCRNA00171  | -0.200698987 | 4.43E-06 | 1.40E-05 |
| NCRNA00173  | -0.275665399 | 1.96E-10 | 1.21E-09 |
| NCRNA00174  | -0.354254886 | 1.13E-16 | 1.78E-15 |
| NCRNA00175  | -0.118416528 | 0.00714  | 0.01303  |
| NCRNA00176  | -0.085189638 | 0.05335  | 0.081111 |
| NCRNA00181  | -0.166196785 | 0.000151 | 0.000374 |
| NCRNA00182  | -0.311545482 | 4.70E-13 | 4.31E-12 |
| NCRNA00183  | -0.085632839 | 0.052117 | 0.079405 |
| NCRNA00185  | 0.053423048  | 0.226171 | 0.29149  |
| NCRNA00188  | 0.187881197  | 1.77E-05 | 5.12E-05 |
| NCRNA00189  | 0.086140526  | 0.050734 | 0.07754  |
| NCRNA00200  | 0.037588208  | 0.394636 | 0.469504 |
| NCRNA00201  | -0.336833373 | 3.96E-15 | 5.01E-14 |
| NCRNA00202  | -0.289373875 | 2.16E-11 | 1.54E-10 |
| NCRNA00203  | -0.166929393 | 0.000141 | 0.000351 |
| NCRNA00204B | -0.241501971 | 2.86E-08 | 1.28E-07 |
| NCRNA00207  | 0.064433015  | 0.14424  | 0.197025 |
| NCRNA00219  | -0.065206441 | 0.139476 | 0.19121  |
| NCRNA00230B | 0.125395969  | 0.004372 | 0.008295 |
| NCRNA00235  | -0.044375448 | 0.314855 | 0.387138 |
| NCS1        | 0.073467683  | 0.095824 | 0.136877 |
| NCSTN       | 0.096835581  | 0.027994 | 0.045244 |
| NDC80       | 0.471264813  | 7.83E-30 | 8.28E-28 |
| NDE1        | 0.093887105  | 0.033158 | 0.052664 |
| NDEL1       | -0.016241941 | 0.713084 | 0.766586 |
| NDFIP1      | -0.055518606 | 0.208455 | 0.27174  |
| NDFIP2      | 0.219151445  | 5.10E-07 | 1.88E-06 |
| NDNL2       | 0.030265709  | 0.493138 | 0.566388 |
| NDN         | -0.283900349 | 5.29E-11 | 3.54E-10 |

|          |              |          |          |
|----------|--------------|----------|----------|
| NDOR1    | -0.098709598 | 0.025084 | 0.040939 |
| NDP      | 0.036630911  | 0.406795 | 0.481553 |
| NDRG1    | 0.119179825  | 0.006775 | 0.012419 |
| NDRG2    | -0.438948448 | 1.14E-25 | 7.10E-24 |
| NDRG3    | 0.11089911   | 0.01179  | 0.020588 |
| NDRG4    | -0.036099446 | 0.413641 | 0.488327 |
| NDST1    | -0.19445855  | 8.80E-06 | 2.66E-05 |
| NDST2    | -0.361378027 | 2.48E-17 | 4.34E-16 |
| NDST3    | -0.014934304 | 0.735281 | 0.785715 |
| NDST4    | 0.039371903  | 0.372572 | 0.447373 |
| NDUFA10  | 0.048801208  | 0.268968 | 0.338632 |
| NDUFA11  | 0.071915269  | 0.103067 | 0.14607  |
| NDUFA12  | 0.355557524  | 8.59E-17 | 1.38E-15 |
| NDUFA13  | 0.030444809  | 0.490582 | 0.563841 |
| NDUFA1   | 0.14031318   | 0.001412 | 0.002922 |
| NDUFA2   | -0.035485838 | 0.421629 | 0.496262 |
| NDUFA3   | 0.055609603  | 0.207709 | 0.270891 |
| NDUFA4L2 | 0.04495717   | 0.308547 | 0.380458 |
| NDUFA4   | 0.169233282  | 0.000114 | 0.000287 |
| NDUFA5   | 0.116187234  | 0.008309 | 0.014974 |
| NDUFA6   | 0.078910038  | 0.073584 | 0.108218 |
| NDUFA7   | 0.057315962  | 0.194077 | 0.255194 |
| NDUFA8   | 0.208113839  | 1.90E-06 | 6.38E-06 |
| NDUFA9   | 0.419558381  | 2.25E-23 | 9.76E-22 |
| NDUFAB1  | 0.278918275  | 1.17E-10 | 7.48E-10 |
| NDUFAF1  | -0.091687098 | 0.037522 | 0.05892  |
| NDUFAF2  | 0.20554088   | 2.56E-06 | 8.40E-06 |
| NDUFAF3  | -0.057422966 | 0.193244 | 0.254317 |
| NDUFAF4  | 0.294647671  | 8.95E-12 | 6.75E-11 |
| NDUFB10  | 0.069770232  | 0.113782 | 0.159599 |
| NDUFB11  | 0.152612337  | 0.00051  | 0.001142 |
| NDUFB1   | 0.149382104  | 0.000672 | 0.001474 |
| NDUFB2   | 0.097389836  | 0.027104 | 0.043931 |
| NDUFB3   | 0.257308393  | 3.12E-09 | 1.60E-08 |
| NDUFB4   | 0.2081366    | 1.90E-06 | 6.37E-06 |
| NDUFB5   | 0.238954662  | 4.04E-08 | 1.76E-07 |
| NDUFB6   | 0.227439913  | 1.81E-07 | 7.17E-07 |
| NDUFB7   | 0.047163401  | 0.285384 | 0.356294 |
| NDUFB8   | 0.18351713   | 2.79E-05 | 7.76E-05 |
| NDUFB9   | 0.285813592  | 3.88E-11 | 2.65E-10 |
| NDUFC1   | 0.122358128  | 0.005428 | 0.010132 |
| NDUFC2   | 0.188937659  | 1.59E-05 | 4.61E-05 |
| NDUFS1   | 0.334211512  | 6.64E-15 | 8.10E-14 |
| NDUFS2   | 0.167786186  | 0.00013  | 0.000326 |

|        |              |          |          |
|--------|--------------|----------|----------|
| NDUFS3 | 0.124798386  | 0.004563 | 0.00863  |
| NDUFS4 | 0.154926805  | 0.000418 | 0.00095  |
| NDUFS5 | 0.121747703  | 0.005667 | 0.010538 |
| NDUFS6 | 0.161137891  | 0.000241 | 0.000573 |
| NDUFS7 | -0.11359616  | 0.00988  | 0.017568 |
| NDUFS8 | 0.116280218  | 0.008257 | 0.014892 |
| NDUFV1 | 0.005041392  | 0.909135 | 0.928838 |
| NDUFV2 | 0.239397988  | 3.80E-08 | 1.66E-07 |
| NDUFV3 | 0.020915192  | 0.635828 | 0.697144 |
| NEAT1  | -0.362217833 | 2.07E-17 | 3.66E-16 |
| NEBL   | -0.084448778 | 0.055465 | 0.083977 |
| NEB    | 0.061401445  | 0.16412  | 0.220578 |
| NECAB1 | -0.222860255 | 3.23E-07 | 1.23E-06 |
| NECAB2 | 0.195582983  | 7.79E-06 | 2.37E-05 |
| NECAB3 | -0.17905528  | 4.38E-05 | 0.000118 |
| NECAP1 | 0.226233008  | 2.11E-07 | 8.27E-07 |
| NECAP2 | -0.12007641  | 0.006368 | 0.011724 |
| NEDD1  | 0.34549264   | 6.96E-16 | 9.83E-15 |
| NEDD4L | -0.150096492 | 0.000632 | 0.001393 |
| NEDD4  | 0.094800759  | 0.031477 | 0.050289 |
| NEDD8  | 0.330988271  | 1.24E-14 | 1.44E-13 |
| NEDD9  | -0.301100736 | 2.97E-12 | 2.40E-11 |
| NEFH   | 0.011665545  | 0.791704 | 0.83296  |
| NEFL   | -0.043034488 | 0.329716 | 0.403129 |
| NEFM   | 0.003075717  | 0.944488 | 0.955918 |
| NEGR1  | -0.241373497 | 2.91E-08 | 1.30E-07 |
| NEIL1  | -0.420596454 | 1.71E-23 | 7.52E-22 |
| NEIL2  | -0.003201596 | 0.94222  | 0.954154 |
| NEIL3  | 0.528373991  | 2.26E-38 | 1.26E-35 |
| NEK10  | -0.146889252 | 0.000827 | 0.001785 |
| NEK11  | -0.234286134 | 7.49E-08 | 3.14E-07 |
| NEK1   | -0.182278383 | 3.16E-05 | 8.72E-05 |
| NEK2   | 0.58281384   | 3.53E-48 | 1.18E-44 |
| NEK3   | -0.025483018 | 0.563946 | 0.632947 |
| NEK4   | 0.142018922  | 0.001231 | 0.002577 |
| NEK5   | -0.173718643 | 7.40E-05 | 0.000192 |
| NEK6   | 0.074659253  | 0.090544 | 0.130136 |
| NEK7   | -0.061498728 | 0.163452 | 0.219798 |
| NEK8   | -0.390169635 | 3.58E-20 | 9.60E-19 |
| NEK9   | -0.164425258 | 0.000178 | 0.000435 |
| NELF   | 0.087535351  | 0.047091 | 0.072421 |
| NELL1  | -0.263248074 | 1.30E-09 | 7.10E-09 |
| NELL2  | -0.227567195 | 1.79E-07 | 7.06E-07 |
| NENF   | -0.044124545 | 0.317601 | 0.390131 |

|          |              |          |          |
|----------|--------------|----------|----------|
| NEO1     | -0.117686999 | 0.007505 | 0.013642 |
| NES      | -0.067829323 | 0.124214 | 0.172309 |
| NET1     | 0.048848754  | 0.268501 | 0.338172 |
| NETO1    | 0.100008186  | 0.023224 | 0.038184 |
| NETO2    | 0.250784148  | 7.94E-09 | 3.85E-08 |
| NEU1     | -0.007095406 | 0.872384 | 0.900496 |
| NEU2     | 0.148233663  | 0.00074  | 0.001612 |
| NEU3     | 0.002784277  | 0.949741 | 0.960797 |
| NEU4     | 0.001384813  | 0.97499  | 0.981225 |
| NEURL1B  | -0.069085307 | 0.117382 | 0.163958 |
| NEURL2   | 0.051440026  | 0.2439   | 0.311307 |
| NEURL3   | -0.156887478 | 0.000352 | 0.00081  |
| NEURL4   | -0.194028538 | 9.22E-06 | 2.78E-05 |
| NEURL    | 0.058697989  | 0.183525 | 0.243127 |
| NEUROD1  | 0.065484829  | 0.13779  | 0.189198 |
| NEUROD2  | -0.117080568 | 0.007822 | 0.01417  |
| NEUROD4  | 0.020680294  | 0.639627 | 0.700694 |
| NEUROD6  | 0.020861618  | 0.636694 | 0.69794  |
| NEUROG1  | 0.068119318  | 0.12261  | 0.170576 |
| NEUROG2  | 0.139318204  | 0.001527 | 0.003143 |
| NEUROG3  | 0.058336283  | 0.186245 | 0.246289 |
| NEXN     | -0.038698617 | 0.38081  | 0.45535  |
| NF1P1    | -0.032749274 | 0.458334 | 0.532163 |
| NF1      | -0.058613829 | 0.184155 | 0.243865 |
| NF2      | -0.043613456 | 0.323245 | 0.396357 |
| NFAM1    | -0.288499473 | 2.50E-11 | 1.75E-10 |
| NFASC    | -0.358882645 | 4.23E-17 | 7.17E-16 |
| NFAT5    | -0.293389588 | 1.11E-11 | 8.21E-11 |
| NFATC1   | -0.389483804 | 4.22E-20 | 1.12E-18 |
| NFATC2IP | -0.229959928 | 1.31E-07 | 5.32E-07 |
| NFATC2   | -0.238754121 | 4.15E-08 | 1.81E-07 |
| NFATC3   | -0.320968252 | 8.35E-14 | 8.54E-13 |
| NFATC4   | -0.122452753 | 0.005392 | 0.010074 |
| NFE2L1   | -0.125737919 | 0.004265 | 0.008104 |
| NFE2L2   | -0.196317791 | 7.19E-06 | 2.20E-05 |
| NFE2L3   | -0.014656146 | 0.740032 | 0.789568 |
| NFE2     | -0.080811834 | 0.066884 | 0.099396 |
| NFIA     | -0.263710988 | 1.22E-09 | 6.67E-09 |
| NFIB     | -0.171639611 | 9.05E-05 | 0.000232 |
| NFIC     | -0.187673887 | 1.81E-05 | 5.22E-05 |
| NFIL3    | 0.162038356  | 0.000222 | 0.000532 |
| NFIX     | -0.509688458 | 2.13E-35 | 6.70E-33 |
| NFKB1    | -0.1285072   | 0.003485 | 0.006725 |
| NFKB2    | -0.039642752 | 0.36929  | 0.444045 |



|         |              |          |          |
|---------|--------------|----------|----------|
| NFKBIA  | -0.033350561 | 0.45012  | 0.524453 |
| NFKBIB  | 0.015642584  | 0.72323  | 0.775282 |
| NFKBID  | -0.367823838 | 6.06E-18 | 1.17E-16 |
| NFKBIE  | -0.056199911 | 0.202916 | 0.265508 |
| NFKBIL1 | -0.02460733  | 0.57742  | 0.644919 |
| NFKBIL2 | 0.218029658  | 5.85E-07 | 2.14E-06 |
| NFKBIZ  | -0.221528952 | 3.81E-07 | 1.43E-06 |
| NFRKB   | -0.105466598 | 0.016653 | 0.028199 |
| NFS1    | 0.100480874  | 0.022578 | 0.037201 |
| NFU1    | 0.229656224  | 1.37E-07 | 5.51E-07 |
| NFX1    | -0.074188086 | 0.092603 | 0.132704 |
| NFXL1   | 0.362839975  | 1.80E-17 | 3.23E-16 |
| NFYA    | 0.121191851  | 0.005892 | 0.010917 |
| NFYB    | 0.206408575  | 2.32E-06 | 7.66E-06 |
| NFYC    | -0.221743602 | 3.71E-07 | 1.40E-06 |
| NGB     | -0.106360921 | 0.015748 | 0.026819 |
| NGDN    | 0.235778641  | 6.16E-08 | 2.61E-07 |
| NGEF    | 0.133517844  | 0.002395 | 0.004763 |
| NGFRAP1 | -0.078084823 | 0.076656 | 0.112357 |
| NGFR    | -0.284680173 | 4.66E-11 | 3.15E-10 |
| NGF     | -0.095089298 | 0.030962 | 0.049536 |
| NGLY1   | 0.012958302  | 0.769241 | 0.814557 |
| NGRN    | 0.084427552  | 0.055527 | 0.084049 |
| NHEDC1  | -0.081183766 | 0.065634 | 0.097756 |
| NHEDC2  | 0.147772416  | 0.000769 | 0.001669 |
| NHEG1   | 0.113482961  | 0.009954 | 0.017688 |
| NHEJ1   | 0.099764265  | 0.023564 | 0.038673 |
| NHLH1   | -0.034128893 | 0.439611 | 0.513916 |
| NHLH2   | -0.124947154 | 0.004515 | 0.008546 |
| NHLRC1  | -0.092730945 | 0.035394 | 0.055925 |
| NHLRC2  | 0.208011922  | 1.92E-06 | 6.45E-06 |
| NHLRC3  | -0.205614207 | 2.54E-06 | 8.33E-06 |
| NHLRC4  | -0.24413307  | 2.00E-08 | 9.16E-08 |
| NHP2L1  | 0.10964678   | 0.012783 | 0.022171 |
| NHP2    | 0.131503166  | 0.00279  | 0.005478 |
| NHSL1   | -0.08201979  | 0.062894 | 0.094062 |
| NHSL2   | -0.336281062 | 4.42E-15 | 5.54E-14 |
| NHS     | -0.21003316  | 1.52E-06 | 5.17E-06 |
| NICN1   | -0.413070219 | 1.22E-22 | 4.71E-21 |
| NID1    | 0.056843783  | 0.197782 | 0.259519 |
| NID2    | 0.167930328  | 0.000129 | 0.000322 |
| NIF3L1  | 0.337557022  | 3.43E-15 | 4.39E-14 |
| NINJ1   | -0.200678641 | 4.44E-06 | 1.40E-05 |
| NINJ2   | -0.19765424  | 6.21E-06 | 1.92E-05 |

|           |              |          |          |
|-----------|--------------|----------|----------|
| NINL      | -0.171400587 | 9.26E-05 | 0.000237 |
| NIN       | 0.039089126  | 0.376018 | 0.45078  |
| NIP7      | 0.43484852   | 3.60E-25 | 2.06E-23 |
| NIPA1     | 0.021244713  | 0.630515 | 0.692357 |
| NIPA2     | 0.246383839  | 1.47E-08 | 6.85E-08 |
| NIPAL1    | 0.133382128  | 0.00242  | 0.004809 |
| NIPAL2    | -0.002572777 | 0.953554 | 0.964215 |
| NIPAL3    | -0.383021847 | 1.93E-19 | 4.67E-18 |
| NIPAL4    | 0.074814044  | 0.089876 | 0.129282 |
| NIPBL     | -0.132527864 | 0.002582 | 0.005103 |
| NIPSNAP1  | 0.259354136  | 2.32E-09 | 1.21E-08 |
| NIPSNAP3A | 0.007002905  | 0.874034 | 0.901682 |
| NIPSNAP3B | -0.336846017 | 3.95E-15 | 5.00E-14 |
| NISCH     | -0.498891214 | 9.20E-34 | 2.00E-31 |
| NIT1      | -0.047787112 | 0.279055 | 0.34957  |
| NIT2      | 0.196764251  | 6.84E-06 | 2.10E-05 |
| NKAIN1    | 0.216064334  | 7.42E-07 | 2.66E-06 |
| NKAIN2    | 0.091664874  | 0.037568 | 0.058979 |
| NKAIN3    | 0.177537047  | 5.09E-05 | 0.000136 |
| NKAIN4    | 0.106342679  | 0.015766 | 0.026843 |
| NKAPL     | -0.16066245  | 0.000251 | 0.000596 |
| NKAP      | 0.088102441  | 0.045674 | 0.070457 |
| NKD1      | -0.143224862 | 0.001117 | 0.002357 |
| NKD2      | -0.27223914  | 3.34E-10 | 1.99E-09 |
| NKG7      | 0.053894465  | 0.222095 | 0.286977 |
| NKIRAS1   | -0.109423272 | 0.012968 | 0.022475 |
| NKIRAS2   | 0.165554828  | 0.000161 | 0.000395 |
| NKPD1     | -0.003772835 | 0.931934 | 0.946712 |
| NKRF      | 0.24685778   | 1.37E-08 | 6.43E-08 |
| NKTR      | -0.336608654 | 4.14E-15 | 5.22E-14 |
| NKX1-2    | 0.207777227  | 1.98E-06 | 6.61E-06 |
| NKX2-1    | -0.279803058 | 1.02E-10 | 6.57E-10 |
| NKX2-2    | 0.063467706  | 0.15036  | 0.204254 |
| NKX2-3    | 0.149951334  | 0.00064  | 0.001409 |
| NKX2-4    | 0.013459132  | 0.760589 | 0.807149 |
| NKX2-5    | 0.138811814  | 0.00159  | 0.003258 |
| NKX2-6    | 0.067665432  | 0.125128 | 0.173432 |
| NKX2-8    | -0.057600957 | 0.191865 | 0.252768 |
| NKX3-1    | -0.009780601 | 0.824763 | 0.86045  |
| NKX3-2    | 0.053969389  | 0.221452 | 0.28622  |
| NKX6-1    | 0.010594921  | 0.810439 | 0.848474 |
| NKX6-2    | -0.024762648 | 0.57502  | 0.642669 |
| NKX6-3    | -0.04401308  | 0.318827 | 0.39142  |
| NLE1      | 0.29478273   | 8.75E-12 | 6.61E-11 |

|           |              |          |          |
|-----------|--------------|----------|----------|
| NLGN1     | -0.046054165 | 0.296879 | 0.368252 |
| NLGN2     | -0.096282904 | 0.028905 | 0.046563 |
| NLGN3     | -0.268597632 | 5.83E-10 | 3.36E-09 |
| NLGN4X    | 0.024506841  | 0.578976 | 0.646188 |
| NLGN4Y    | 0.153965661  | 0.000454 | 0.001026 |
| NLK       | 0.010035907  | 0.820266 | 0.856652 |
| NLN       | 0.346792413  | 5.33E-16 | 7.71E-15 |
| NLRC3     | -0.28950537  | 2.11E-11 | 1.51E-10 |
| NLRC4     | -0.248465726 | 1.10E-08 | 5.22E-08 |
| NLRC5     | -0.135312721 | 0.002088 | 0.0042   |
| NLRP10    | 0.070282488  | 0.111147 | 0.156209 |
| NLRP11    | 0.110147513  | 0.012378 | 0.021528 |
| NLRP12    | -0.058734599 | 0.183251 | 0.24278  |
| NLRP13    | 0.074443881  | 0.091481 | 0.13134  |
| NLRP14    | -0.144060204 | 0.001044 | 0.002213 |
| NLRP1     | -0.437431286 | 1.75E-25 | 1.06E-23 |
| NLRP2     | -0.086088613 | 0.050874 | 0.077713 |
| NLRP3     | -0.295705965 | 7.49E-12 | 5.72E-11 |
| NLRP4     | 0.001442841  | 0.973943 | 0.980417 |
| NLRP5     | 0.138255422  | 0.001661 | 0.003395 |
| NLRP6     | -0.151425131 | 0.000565 | 0.001254 |
| NLRP7     | -0.017973405 | 0.684064 | 0.740847 |
| NLRP8     | 0.152301903  | 0.000524 | 0.001171 |
| NLRP9     | -0.323880345 | 4.84E-14 | 5.14E-13 |
| NLRX1     | -0.174136829 | 7.11E-05 | 0.000185 |
| NMBR      | -0.242114045 | 2.64E-08 | 1.18E-07 |
| NMB       | 0.24026514   | 3.38E-08 | 1.50E-07 |
| NMD3      | 0.388883927  | 4.86E-20 | 1.27E-18 |
| NME1-NME2 | 0.242322724  | 2.56E-08 | 1.15E-07 |
| NME1      | 0.501738123  | 3.45E-34 | 8.38E-32 |
| NME2P1    | 0.327679617  | 2.35E-14 | 2.62E-13 |
| NME2      | 0.383376067  | 1.78E-19 | 4.33E-18 |
| NME3      | -0.202880191 | 3.46E-06 | 1.11E-05 |
| NME4      | 0.182524025  | 3.08E-05 | 8.53E-05 |
| NME5      | -0.236009302 | 5.97E-08 | 2.54E-07 |
| NME6      | 0.244782116  | 1.83E-08 | 8.42E-08 |
| NME7      | 0.140250678  | 0.001419 | 0.002936 |
| NMI       | 0.136464714  | 0.00191  | 0.003862 |
| NMNAT1    | -0.108489034 | 0.013766 | 0.023748 |
| NMNAT2    | -0.138668006 | 0.001608 | 0.003293 |
| NMNAT3    | -0.275946119 | 1.88E-10 | 1.16E-09 |
| NMRAL1    | -0.069976049 | 0.112718 | 0.15825  |
| NMT1      | 0.074955299  | 0.089269 | 0.128507 |
| NMT2      | -0.078857298 | 0.073777 | 0.10847  |

|          |              |          |          |
|----------|--------------|----------|----------|
| NMUR1    | -0.257326002 | 3.11E-09 | 1.59E-08 |
| NMUR2    | -0.184152301 | 2.61E-05 | 7.31E-05 |
| NMU      | 0.1976507    | 6.21E-06 | 1.92E-05 |
| NNAT     | -0.241480488 | 2.87E-08 | 1.28E-07 |
| NNMT     | 0.170291205  | 0.000103 | 0.000262 |
| NNT      | -0.057587528 | 0.191969 | 0.252855 |
| NOB1     | 0.260808211  | 1.87E-09 | 9.93E-09 |
| NOBOX    | -0.025493466 | 0.563786 | 0.632839 |
| NOC2L    | 0.116077358  | 0.008371 | 0.015074 |
| NOC3L    | 0.279434352  | 1.08E-10 | 6.92E-10 |
| NOC4L    | 0.15293702   | 0.000496 | 0.001113 |
| NOD1     | -0.443326238 | 3.31E-26 | 2.21E-24 |
| NOD2     | -0.205398318 | 2.60E-06 | 8.52E-06 |
| NODAL    | -0.09991958  | 0.023347 | 0.038364 |
| NOG      | -0.104391566 | 0.0178   | 0.029972 |
| NOL10    | 0.351368863  | 2.07E-16 | 3.14E-15 |
| NOL11    | 0.368219536  | 5.55E-18 | 1.08E-16 |
| NOL12    | -0.0576818   | 0.191241 | 0.252046 |
| NOL3     | -0.030659947 | 0.487521 | 0.560871 |
| NOL4     | 0.066096605  | 0.134143 | 0.184748 |
| NOL6     | 0.151913295  | 0.000542 | 0.001207 |
| NOL7     | 0.324607826  | 4.22E-14 | 4.54E-13 |
| NOL8     | 0.021352361  | 0.628783 | 0.691164 |
| NOL9     | 0.062435021  | 0.157123 | 0.212287 |
| NOLC1    | 0.390085139  | 3.65E-20 | 9.77E-19 |
| NOM1     | 0.081830984  | 0.063505 | 0.094868 |
| NOMO1    | 0.059901338  | 0.174688 | 0.233113 |
| NOMO2    | 0.019436098  | 0.659904 | 0.719006 |
| NOMO3    | -0.044739066 | 0.310902 | 0.382937 |
| NONO     | 0.204680202  | 2.82E-06 | 9.20E-06 |
| NOP10    | 0.32203594   | 6.84E-14 | 7.10E-13 |
| NOP14    | 0.271065025  | 4.00E-10 | 2.36E-09 |
| NOP16    | 0.334104602  | 6.78E-15 | 8.25E-14 |
| NOP2     | 0.368904528  | 4.77E-18 | 9.37E-17 |
| NOP56    | 0.342964107  | 1.16E-15 | 1.59E-14 |
| NOP58    | 0.314868823  | 2.57E-13 | 2.46E-12 |
| NOS1AP   | -0.177853044 | 4.93E-05 | 0.000132 |
| NOS1     | -0.084625447 | 0.054955 | 0.083309 |
| NOS2     | 0.020575703  | 0.641322 | 0.702243 |
| NOS3     | -0.040251649 | 0.361977 | 0.436512 |
| NOSIP    | 0.064092966  | 0.146374 | 0.19949  |
| NOSTRIN  | -0.220834472 | 4.15E-07 | 1.55E-06 |
| NOTCH1   | -0.253710715 | 5.24E-09 | 2.61E-08 |
| NOTCH2NL | -0.08585058  | 0.05152  | 0.078598 |

|        |              |          |          |
|--------|--------------|----------|----------|
| NOTCH2 | -0.173942101 | 7.25E-05 | 0.000188 |
| NOTCH3 | 0.06004988   | 0.173619 | 0.231879 |
| NOTCH4 | -0.263052013 | 1.34E-09 | 7.29E-09 |
| NOTO   | -0.156600369 | 0.000361 | 0.000829 |
| NOTUM  | -0.096642548 | 0.028309 | 0.04571  |
| NOVA1  | -0.055492524 | 0.208669 | 0.271984 |
| NOVA2  | -0.173101835 | 7.86E-05 | 0.000203 |
| NOV    | -0.084776973 | 0.05452  | 0.082751 |
| NOX1   | -0.121202996 | 0.005887 | 0.010909 |
| NOX3   | 0.009542999  | 0.828954 | 0.863909 |
| NOX4   | 0.152633503  | 0.000509 | 0.00114  |
| NOX5   | 0.107447251  | 0.014707 | 0.025225 |
| NOXA1  | -0.185636648 | 2.24E-05 | 6.34E-05 |
| NOXO1  | 0.030380338  | 0.491501 | 0.5648   |
| NPAS1  | 0.009291841  | 0.833389 | 0.867592 |
| NPAS2  | -0.083225012 | 0.059112 | 0.08891  |
| NPAS3  | -0.022367687 | 0.612552 | 0.676559 |
| NPAS4  | -0.088515263 | 0.044665 | 0.069057 |
| NPAT   | -0.05784754  | 0.189967 | 0.250548 |
| NPBWR1 | 0.072648297  | 0.099594 | 0.141767 |
| NPBWR2 | -0.019750888 | 0.65475  | 0.714363 |
| NPB    | 0.05844125   | 0.185452 | 0.245306 |
| NPC1L1 | 0.054454264  | 0.217323 | 0.28163  |
| NPC1   | -0.115049951 | 0.008969 | 0.016052 |
| NPC2   | -0.313445646 | 3.33E-13 | 3.14E-12 |
| NPDC1  | -0.196130812 | 7.34E-06 | 2.24E-05 |
| NPEPL1 | -0.259049256 | 2.42E-09 | 1.26E-08 |
| NPEPPS | 0.137973437  | 0.001698 | 0.003467 |
| NPFFR1 | -0.234014769 | 7.76E-08 | 3.25E-07 |
| NPFFR2 | 0.070001324  | 0.112587 | 0.158089 |
| NPFF   | -0.265452234 | 9.38E-10 | 5.24E-09 |
| NPHP1  | -0.22340437  | 3.02E-07 | 1.15E-06 |
| NPHP3  | -0.3082677   | 8.45E-13 | 7.48E-12 |
| NPHP4  | -0.285557891 | 4.04E-11 | 2.75E-10 |
| NPHS1  | -0.106235166 | 0.015873 | 0.026999 |
| NPHS2  | -0.009421666 | 0.831095 | 0.865475 |
| NPIPL3 | -0.292268847 | 1.34E-11 | 9.81E-11 |
| NPIP   | -0.359562999 | 3.66E-17 | 6.27E-16 |
| NPLOC4 | 0.020216971  | 0.647148 | 0.707421 |
| NPL    | -0.121095331 | 0.005931 | 0.010984 |
| NPM1   | 0.259782015  | 2.18E-09 | 1.14E-08 |
| NPM2   | -0.163272566 | 0.000198 | 0.00048  |
| NPM3   | 0.37705044   | 7.64E-19 | 1.69E-17 |
| NPNT   | -0.254752295 | 4.51E-09 | 2.26E-08 |

|         |              |          |          |
|---------|--------------|----------|----------|
| NPPA    | -0.185889866 | 2.18E-05 | 6.19E-05 |
| NPPB    | 0.041912261  | 0.342495 | 0.416584 |
| NPPC    | -0.083709284 | 0.057646 | 0.086927 |
| NPR1    | -0.30766948  | 9.40E-13 | 8.27E-12 |
| NPR2    | -0.264322861 | 1.11E-09 | 6.14E-09 |
| NPR3    | -0.075296314 | 0.087819 | 0.126702 |
| NPRL2   | -0.048142555 | 0.27549  | 0.345886 |
| NPRL3   | -0.083313739 | 0.058841 | 0.088569 |
| NPSR1   | 0.076592746  | 0.082477 | 0.119833 |
| NPTN    | 0.166708579  | 0.000144 | 0.000358 |
| NPTX1   | -0.106690451 | 0.015426 | 0.026315 |
| NPTX2   | 0.100870734  | 0.022056 | 0.036437 |
| NPTXR   | -0.231260548 | 1.11E-07 | 4.55E-07 |
| NPVF    | 0.031869722  | 0.4705   | 0.544241 |
| NPW     | 0.211413002  | 1.29E-06 | 4.45E-06 |
| NPY1R   | -0.160974874 | 0.000244 | 0.000581 |
| NPY2R   | -0.074154316 | 0.092752 | 0.132841 |
| NPY5R   | -0.075354694 | 0.087572 | 0.126373 |
| NPY6R   | -0.283091221 | 6.03E-11 | 4.00E-10 |
| NPY     | -0.036338683 | 0.410551 | 0.485195 |
| NQO1    | 0.207490798  | 2.04E-06 | 6.81E-06 |
| NQO2    | 0.114315011  | 0.00942  | 0.016803 |
| NR0B1   | 0.216652022  | 6.91E-07 | 2.49E-06 |
| NR0B2   | -0.252930446 | 5.85E-09 | 2.89E-08 |
| NR1D1   | -0.101328228 | 0.021457 | 0.035542 |
| NR1D2   | -0.148334957 | 0.000733 | 0.001599 |
| NR1H2   | -0.194840937 | 8.44E-06 | 2.56E-05 |
| NR1H3   | -0.149387063 | 0.000671 | 0.001474 |
| NR1H4   | 0.054265508  | 0.218924 | 0.283429 |
| NR1I2   | -0.070344304 | 0.110832 | 0.155822 |
| NR1I3   | 0.073862929  | 0.094046 | 0.134578 |
| NR2C1   | -0.033912429 | 0.442519 | 0.516772 |
| NR2C2AP | 0.12745049   | 0.003766 | 0.007221 |
| NR2C2   | -0.255800646 | 3.88E-09 | 1.96E-08 |
| NR2E1   | -0.083117022 | 0.059443 | 0.089361 |
| NR2E3   | -0.229810646 | 1.34E-07 | 5.41E-07 |
| NR2F1   | -0.271462082 | 3.76E-10 | 2.23E-09 |
| NR2F2   | -0.097940163 | 0.026245 | 0.042674 |
| NR2F6   | 0.128652834  | 0.003448 | 0.006658 |
| NR3C1   | -0.023410028 | 0.596084 | 0.662009 |
| NR3C2   | -0.475922272 | 1.80E-30 | 2.17E-28 |
| NR4A1   | -0.139887341 | 0.00146  | 0.003015 |
| NR4A2   | -0.046661116 | 0.290552 | 0.361638 |
| NR4A3   | -0.1561688   | 0.000375 | 0.000858 |

|         |              |          |          |
|---------|--------------|----------|----------|
| NR5A1   | 0.113494297  | 0.009947 | 0.017676 |
| NR5A2   | -0.10408467  | 0.01814  | 0.030501 |
| NR6A1   | -0.018163086 | 0.680912 | 0.738074 |
| NRADDP  | -0.237699342 | 4.77E-08 | 2.06E-07 |
| NRAP    | -0.199221559 | 5.22E-06 | 1.63E-05 |
| NRARP   | 0.249551546  | 9.44E-09 | 4.54E-08 |
| NRAS    | 0.400245151  | 3.10E-21 | 9.78E-20 |
| NRBF2   | 0.323957773  | 4.77E-14 | 5.07E-13 |
| NRBP1   | 0.212277271  | 1.17E-06 | 4.05E-06 |
| NRBP2   | -0.195579119 | 7.79E-06 | 2.37E-05 |
| NRCAM   | -0.095625807 | 0.030022 | 0.048215 |
| NRD1    | 0.155370285  | 0.000402 | 0.000916 |
| NRF1    | -0.078477903 | 0.07518  | 0.110403 |
| NRG1    | -0.048884783 | 0.268147 | 0.337791 |
| NRG2    | -0.257894702 | 2.87E-09 | 1.48E-08 |
| NRG3    | -0.157629207 | 0.000329 | 0.000763 |
| NRG4    | 0.027088742  | 0.539638 | 0.610533 |
| NRGN    | -0.281376125 | 7.94E-11 | 5.19E-10 |
| NRIP1   | 0.245422181  | 1.68E-08 | 7.75E-08 |
| NRIP2   | -0.386764795 | 8.03E-20 | 2.03E-18 |
| NRIP3   | 0.047035714  | 0.286692 | 0.357636 |
| NRK     | 0.048218116  | 0.274737 | 0.345113 |
| NRL     | -0.093400951 | 0.034083 | 0.054007 |
| NRM     | 0.11229444   | 0.010765 | 0.018984 |
| NRN1L   | -0.21949355  | 4.89E-07 | 1.81E-06 |
| NRN1    | -0.133894647 | 0.002328 | 0.004638 |
| NRP1    | -0.046812113 | 0.288992 | 0.360055 |
| NRP2    | 0.02630936   | 0.551371 | 0.621416 |
| NRSN1   | 0.007152517  | 0.871366 | 0.899724 |
| NRSN2   | -0.055127055 | 0.211686 | 0.275324 |
| NRTN    | -0.019669037 | 0.656089 | 0.715629 |
| NRXN1   | -0.143105246 | 0.001128 | 0.002377 |
| NRXN2   | -0.331534037 | 1.12E-14 | 1.31E-13 |
| NRXN3   | -0.214747597 | 8.70E-07 | 3.08E-06 |
| NSA2    | 0.02166422   | 0.623778 | 0.686606 |
| NSD1    | -0.120725768 | 0.006086 | 0.011245 |
| NSDHL   | 0.24046896   | 3.29E-08 | 1.46E-07 |
| NSFL1C  | 0.032409751  | 0.46301  | 0.536968 |
| NSF     | 0.13773615   | 0.00173  | 0.003526 |
| NSL1    | 0.208675515  | 1.78E-06 | 6.01E-06 |
| NSMAF   | 0.13264048   | 0.00256  | 0.005062 |
| NSMCE1  | -0.016904516 | 0.701928 | 0.757374 |
| NSMCE2  | 0.28081919   | 8.68E-11 | 5.65E-10 |
| NSMCE4A | 0.046959688  | 0.287473 | 0.358453 |

|         |              |          |          |
|---------|--------------|----------|----------|
| NSUN2   | 0.224241845  | 2.72E-07 | 1.04E-06 |
| NSUN3   | 0.07783189   | 0.077619 | 0.113544 |
| NSUN4   | -0.083822481 | 0.057307 | 0.086463 |
| NSUN5P1 | -0.210853206 | 1.38E-06 | 4.74E-06 |
| NSUN5P2 | -0.20056989  | 4.49E-06 | 1.42E-05 |
| NSUN5   | 0.107018518  | 0.015111 | 0.025846 |
| NSUN6   | -0.09585362  | 0.029631 | 0.047648 |
| NSUN7   | -0.199020454 | 5.34E-06 | 1.67E-05 |
| NT5C1A  | -0.28294377  | 6.17E-11 | 4.09E-10 |
| NT5C1B  | -0.188140563 | 1.73E-05 | 4.99E-05 |
| NT5C2   | -0.000350886 | 0.993662 | 0.995305 |
| NT5C3L  | 0.195583076  | 7.79E-06 | 2.37E-05 |
| NT5C3   | 0.335561768  | 5.09E-15 | 6.33E-14 |
| NT5C    | 0.047842724  | 0.278495 | 0.349029 |
| NT5DC1  | -0.148527556 | 0.000722 | 0.001576 |
| NT5DC2  | 0.040652147  | 0.357216 | 0.431683 |
| NT5DC3  | 0.155729148  | 0.000389 | 0.00089  |
| NT5E    | -0.039755963 | 0.367923 | 0.442562 |
| NT5M    | -0.020234341 | 0.646865 | 0.707213 |
| NTAN1   | 0.029872915  | 0.498769 | 0.571869 |
| NTF3    | -0.157413737 | 0.000336 | 0.000776 |
| NTF4    | -0.355804425 | 8.15E-17 | 1.32E-15 |
| NTHL1   | -0.009637357 | 0.827289 | 0.8625   |
| NTM     | -0.051441649 | 0.243885 | 0.311307 |
| NTN1    | -0.172808536 | 8.09E-05 | 0.000208 |
| NTN3    | -0.110386161 | 0.012189 | 0.021233 |
| NTN4    | -0.286877648 | 3.26E-11 | 2.25E-10 |
| NTN5    | -0.315046406 | 2.49E-13 | 2.39E-12 |
| NTNG1   | -0.167564614 | 0.000133 | 0.000332 |
| NTNG2   | 0.02518307   | 0.568544 | 0.636963 |
| NTRK1   | -0.273617087 | 2.70E-10 | 1.63E-09 |
| NTRK2   | -0.306119372 | 1.24E-12 | 1.07E-11 |
| NTRK3   | -0.368170992 | 5.61E-18 | 1.09E-16 |
| NTSR1   | 0.186570644  | 2.03E-05 | 5.80E-05 |
| NTSR2   | -0.056145627 | 0.203354 | 0.265958 |
| NTS     | 0.184882836  | 2.42E-05 | 6.81E-05 |
| NUAK1   | -0.027791636 | 0.529165 | 0.601065 |
| NUAK2   | -0.165704909 | 0.000158 | 0.00039  |
| NUB1    | -0.024694304 | 0.576075 | 0.643668 |
| NUBP1   | -0.190870398 | 1.29E-05 | 3.81E-05 |
| NUBP2   | -0.057963137 | 0.189082 | 0.249529 |
| NUBPL   | 0.205215635  | 2.66E-06 | 8.69E-06 |
| NUCB1   | -0.272719267 | 3.10E-10 | 1.85E-09 |
| NUCB2   | 0.026096793  | 0.554593 | 0.624167 |



|          |              |          |          |
|----------|--------------|----------|----------|
| NUCKS1   | 0.088851837  | 0.043857 | 0.067907 |
| NUDCD1   | 0.459969335  | 2.51E-28 | 2.13E-26 |
| NUDCD2   | 0.182961498  | 2.95E-05 | 8.19E-05 |
| NUDCD3   | -0.040310155 | 0.361279 | 0.43596  |
| NUDC     | -0.017560647 | 0.690942 | 0.747284 |
| NUDT10   | -0.065410631 | 0.138238 | 0.189734 |
| NUDT11   | 0.086349652  | 0.050173 | 0.076801 |
| NUDT12   | -0.167589737 | 0.000133 | 0.000331 |
| NUDT13   | -0.155455062 | 0.000399 | 0.000909 |
| NUDT14   | -0.126122608 | 0.004148 | 0.007899 |
| NUDT15   | 0.383361331  | 1.78E-19 | 4.34E-18 |
| NUDT16L1 | -0.186750284 | 2.00E-05 | 5.71E-05 |
| NUDT16P1 | 0.054906393  | 0.213523 | 0.277479 |
| NUDT16   | -0.320291618 | 9.48E-14 | 9.62E-13 |
| NUDT17   | -0.111759971 | 0.011148 | 0.019591 |
| NUDT18   | -0.183870302 | 2.69E-05 | 7.51E-05 |
| NUDT19   | 0.181099997  | 3.56E-05 | 9.76E-05 |
| NUDT1    | 0.278765238  | 1.20E-10 | 7.65E-10 |
| NUDT21   | 0.186606308  | 2.03E-05 | 5.78E-05 |
| NUDT22   | -0.032356914 | 0.46374  | 0.537596 |
| NUDT2    | 0.212969779  | 1.08E-06 | 3.75E-06 |
| NUDT3    | 0.303166887  | 2.08E-12 | 1.72E-11 |
| NUDT4    | 0.074813241  | 0.089879 | 0.129282 |
| NUDT5    | 0.321329622  | 7.81E-14 | 8.04E-13 |
| NUDT6    | 0.070744917  | 0.10881  | 0.153312 |
| NUDT7    | -0.187970115 | 1.76E-05 | 5.07E-05 |
| NUDT8    | 0.064410508  | 0.14438  | 0.197204 |
| NUDT9P1  | 0.027510875  | 0.533336 | 0.604669 |
| NUDT9    | 0.136788716  | 0.001863 | 0.003773 |
| NUF2     | 0.532895157  | 4.04E-39 | 2.72E-36 |
| NUFIP1   | 0.309609404  | 6.65E-13 | 5.99E-12 |
| NUFIP2   | -0.054671511 | 0.215492 | 0.279691 |
| NUMA1    | -0.293003587 | 1.18E-11 | 8.73E-11 |
| NUMBL    | 0.055755305  | 0.206518 | 0.269497 |
| NUMB     | 0.010452195  | 0.812945 | 0.850652 |
| NUP107   | 0.319618483  | 1.07E-13 | 1.09E-12 |
| NUP133   | 0.113972519  | 0.009637 | 0.01717  |
| NUP153   | 0.211459275  | 1.29E-06 | 4.43E-06 |
| NUP155   | 0.293077005  | 1.17E-11 | 8.63E-11 |
| NUP160   | 0.11598973   | 0.00842  | 0.015152 |
| NUP188   | 0.018898147  | 0.668751 | 0.726822 |
| NUP205   | 0.321725497  | 7.25E-14 | 7.51E-13 |
| NUP210L  | -0.221478924 | 3.83E-07 | 1.44E-06 |
| NUP210   | 0.034779001  | 0.430941 | 0.505557 |

|         |              |          |          |
|---------|--------------|----------|----------|
| NUP214  | -0.106376868 | 0.015732 | 0.026797 |
| NUP35   | 0.346493508  | 5.67E-16 | 8.13E-15 |
| NUP37   | 0.531287221  | 7.48E-39 | 4.82E-36 |
| NUP43   | 0.0642366    | 0.145469 | 0.198501 |
| NUP50   | 0.128571579  | 0.003469 | 0.006697 |
| NUP54   | 0.32155548   | 7.49E-14 | 7.74E-13 |
| NUP62CL | 0.155038579  | 0.000414 | 0.000941 |
| NUP62   | 0.103118633  | 0.019248 | 0.032187 |
| NUP85   | 0.187144643  | 1.92E-05 | 5.49E-05 |
| NUP88   | 0.204755551  | 2.80E-06 | 9.13E-06 |
| NUP93   | 0.219216579  | 5.06E-07 | 1.87E-06 |
| NUP98   | 0.152148212  | 0.000531 | 0.001185 |
| NUPL1   | 0.016536179  | 0.708122 | 0.762523 |
| NUPL2   | 0.141168526  | 0.001318 | 0.002743 |
| NUPR1   | -0.220140852 | 4.52E-07 | 1.68E-06 |
| NUS1    | 0.314452552  | 2.78E-13 | 2.64E-12 |
| NUSAP1  | 0.485390995  | 8.49E-32 | 1.31E-29 |
| NUTF2   | 0.30388153   | 1.83E-12 | 1.54E-11 |
| NVL     | -0.015060873 | 0.733123 | 0.783872 |
| NWD1    | -0.351764137 | 1.91E-16 | 2.91E-15 |
| NXF1    | -0.353608089 | 1.30E-16 | 2.03E-15 |
| NXF2B   | -0.160383812 | 0.000258 | 0.00061  |
| NXF2    | -0.111464263 | 0.011365 | 0.019949 |
| NXF3    | -0.232629719 | 9.30E-08 | 3.85E-07 |
| NXF4    | -0.075974432 | 0.084991 | 0.123021 |
| NXF5    | -0.124675217 | 0.004604 | 0.008703 |
| NXNL1   | -0.18063069  | 3.74E-05 | 0.000102 |
| NXNL2   | 0.06428865   | 0.145143 | 0.198096 |
| NXN     | -0.191587647 | 1.20E-05 | 3.55E-05 |
| NXPH1   | 0.095410819  | 0.030396 | 0.048732 |
| NXPH2   | 0.013687948  | 0.756646 | 0.803647 |
| NXPH3   | -0.342527068 | 1.27E-15 | 1.73E-14 |
| NXPH4   | 0.123794775  | 0.004903 | 0.009226 |
| NXT1    | 0.234331806  | 7.45E-08 | 3.12E-07 |
| NXT2    | 0.139051009  | 0.00156  | 0.003204 |
| NYNRIN  | -0.216598015 | 6.96E-07 | 2.50E-06 |
| NYX     | 0.106516512  | 0.015595 | 0.026572 |
| OAF     | -0.010138242 | 0.818465 | 0.855129 |
| OAS1    | 0.161321821  | 0.000237 | 0.000564 |
| OAS2    | -0.063048136 | 0.15308  | 0.20747  |
| OAS3    | 0.104747765  | 0.017413 | 0.029356 |
| OASL    | 0.082427283  | 0.061594 | 0.092337 |
| OAT     | 0.166262841  | 0.00015  | 0.000372 |
| OAZ1    | 0.00150978   | 0.972734 | 0.979546 |

|        |              |          |          |
|--------|--------------|----------|----------|
| OAZ2   | -0.121665464 | 0.005699 | 0.010592 |
| OAZ3   | 0.035905988  | 0.41615  | 0.490912 |
| OBFC1  | -0.135372365 | 0.002078 | 0.004182 |
| OBFC2A | -0.03308918  | 0.45368  | 0.527828 |
| OBFC2B | 0.426442996  | 3.58E-24 | 1.79E-22 |
| OBP2A  | 0.19049032   | 1.35E-05 | 3.96E-05 |
| OBP2B  | 0.166372016  | 0.000149 | 0.000368 |
| OBSCN  | -0.24319785  | 2.27E-08 | 1.03E-07 |
| OBSL1  | -0.151160285 | 0.000578 | 0.001281 |
| OC90   | 0.043352637  | 0.32615  | 0.399404 |
| OCA2   | -0.033907451 | 0.442586 | 0.51682  |
| OCEL1  | -0.105369024 | 0.016754 | 0.028358 |
| OCIAD1 | 0.20699142   | 2.17E-06 | 7.19E-06 |
| OCIAD2 | 0.143105501  | 0.001128 | 0.002377 |
| OCLM   | -0.046203284 | 0.295316 | 0.366655 |
| OCLN   | -0.286459421 | 3.49E-11 | 2.40E-10 |
| OCM2   | -0.012619219 | 0.775115 | 0.819177 |
| OCM    | -0.223416204 | 3.01E-07 | 1.15E-06 |
| OCRL   | 0.124067402  | 0.004808 | 0.009064 |
| ODAM   | -0.241628935 | 2.81E-08 | 1.26E-07 |
| ODC1   | 0.225037726  | 2.46E-07 | 9.51E-07 |
| ODF1   | -0.116668721 | 0.008043 | 0.014546 |
| ODF2L  | -0.046972571 | 0.28734  | 0.358333 |
| ODF2   | 0.026192422  | 0.553142 | 0.62299  |
| ODF3B  | -0.254136691 | 4.93E-09 | 2.46E-08 |
| ODF3L1 | -0.158611516 | 0.000302 | 0.000705 |
| ODF3L2 | 0.045300274  | 0.304865 | 0.376616 |
| ODF3   | -0.059667451 | 0.17638  | 0.235142 |
| ODF4   | -0.016738157 | 0.704723 | 0.759722 |
| ODZ1   | -0.034570929 | 0.433705 | 0.50835  |
| ODZ2   | -0.188740094 | 1.62E-05 | 4.70E-05 |
| ODZ3   | 0.08575652   | 0.051777 | 0.07896  |
| ODZ4   | -0.086662212 | 0.049345 | 0.075591 |
| OFD1   | -0.33331233  | 7.91E-15 | 9.48E-14 |
| OGDHL  | 0.024828399  | 0.574005 | 0.641761 |
| OGDH   | -0.11533528  | 0.008799 | 0.015771 |
| OGFOD1 | 0.226451153  | 2.06E-07 | 8.07E-07 |
| OGFOD2 | -0.133563565 | 0.002387 | 0.004748 |
| OGFRL1 | -0.097979351 | 0.026185 | 0.04259  |
| OGFR   | -0.217013273 | 6.62E-07 | 2.39E-06 |
| OGG1   | -0.016040169 | 0.716494 | 0.769258 |
| OGN    | -0.314487618 | 2.76E-13 | 2.62E-12 |
| OGT    | -0.284471297 | 4.82E-11 | 3.25E-10 |
| OIP5   | 0.524942749  | 8.21E-38 | 4.10E-35 |

|         |              |          |          |
|---------|--------------|----------|----------|
| OIT3    | -0.140513561 | 0.001389 | 0.00288  |
| OLA1    | 0.46689879   | 3.04E-29 | 2.96E-27 |
| OLAH    | 0.159811364  | 0.000271 | 0.000639 |
| OLFM1   | -0.403234615 | 1.48E-21 | 4.93E-20 |
| OLFM2   | -0.077579917 | 0.078587 | 0.1148   |
| OLFM3   | 0.032793801  | 0.457723 | 0.53167  |
| OLFM4   | 0.06414296   | 0.146058 | 0.199155 |
| OLFML1  | -0.225448947 | 2.33E-07 | 9.06E-07 |
| OLFML2A | -0.049336303 | 0.263747 | 0.332919 |
| OLFML2B | 0.102370959  | 0.020145 | 0.033553 |
| OLFML3  | -0.167464284 | 0.000134 | 0.000335 |
| OLIG1   | -0.267307953 | 7.09E-10 | 4.03E-09 |
| OLIG2   | 0.053492477  | 0.225568 | 0.290875 |
| OLIG3   | 0.025412766  | 0.565021 | 0.633905 |
| OLR1    | -0.263540997 | 1.25E-09 | 6.81E-09 |
| OMA1    | -0.174390254 | 6.94E-05 | 0.000181 |
| OMD     | -0.095052925 | 0.031026 | 0.049629 |
| OMG     | -0.140445113 | 0.001397 | 0.002894 |
| OMP     | 0.063976355  | 0.147111 | 0.200378 |
| ONECUT1 | 0.025335915  | 0.566199 | 0.634941 |
| ONECUT2 | 0.025009086  | 0.57122  | 0.639352 |
| ONECUT3 | -0.02178613  | 0.621827 | 0.684887 |
| OOEP    | 0.116519448  | 0.008125 | 0.014675 |
| OPA1    | 0.255180643  | 4.24E-09 | 2.14E-08 |
| OPA3    | -0.03869282  | 0.380881 | 0.455408 |
| OPALIN  | -0.035292575 | 0.424164 | 0.498805 |
| OPCML   | -0.081588326 | 0.064296 | 0.095893 |
| OPHN1   | -0.249236929 | 9.86E-09 | 4.73E-08 |
| OPLAH   | -0.015102876 | 0.732407 | 0.783359 |
| OPN1LW  | 0.001220599  | 0.977955 | 0.983719 |
| OPN1MW  | 0.026680261  | 0.545772 | 0.616391 |
| OPN1SW  | 0.090803223  | 0.039408 | 0.061586 |
| OPN3    | 0.358768215  | 4.34E-17 | 7.33E-16 |
| OPN4    | 0.021280236  | 0.629943 | 0.691906 |
| OPN5    | -0.049885052 | 0.258466 | 0.327224 |
| OPRD1   | 0.045396897  | 0.303834 | 0.375632 |
| OPRK1   | -0.172374195 | 8.43E-05 | 0.000217 |
| OPRL1   | -0.149007353 | 0.000693 | 0.001519 |
| OPRM1   | -0.014290624 | 0.746291 | 0.795014 |
| OPTC    | 0.079058422  | 0.073042 | 0.107489 |
| OPTN    | -0.003265656 | 0.941066 | 0.953493 |
| OR10A2  | 0.001991321  | 0.964043 | 0.972264 |
| OR10A3  | -0.115114773 | 0.00893  | 0.015991 |
| OR10A4  | -0.038235028 | 0.386545 | 0.461325 |

|         |              |          |          |
|---------|--------------|----------|----------|
| OR10A5  | 0.029395953  | 0.505652 | 0.578401 |
| OR10A6  | -0.091434375 | 0.038053 | 0.059688 |
| OR10AD1 | -0.227930733 | 1.70E-07 | 6.76E-07 |
| OR10G2  | -0.083941915 | 0.056952 | 0.085992 |
| OR10G3  | 0.031352544  | 0.477736 | 0.551519 |
| OR10G4  | -0.007034604 | 0.873468 | 0.901214 |
| OR10G7  | -0.068873302 | 0.118514 | 0.165343 |
| OR10G8  | -0.015840184 | 0.719879 | 0.772312 |
| OR10H1  | -0.018967128 | 0.667614 | 0.725892 |
| OR10H2  | -0.001642106 | 0.970346 | 0.977683 |
| OR10H5  | -0.004610155 | 0.916878 | 0.934885 |
| OR10J1  | -0.045594964 | 0.301727 | 0.373408 |
| OR10J3  | -0.006927922 | 0.875371 | 0.902741 |
| OR10J5  | 0.033533275  | 0.44764  | 0.521898 |
| OR10P1  | 0.034114181  | 0.439808 | 0.514117 |
| OR10Q1  | 0.061262889  | 0.165076 | 0.221728 |
| OR10S1  | 0.003834675  | 0.930821 | 0.945918 |
| OR10V1  | -0.150086661 | 0.000633 | 0.001394 |
| OR10W1  | 0.052819253  | 0.231469 | 0.297608 |
| OR11A1  | -0.056746392 | 0.198552 | 0.260342 |
| OR11G2  | -0.013733795 | 0.755856 | 0.803106 |
| OR11H12 | -0.028535183 | 0.518199 | 0.590387 |
| OR11H4  | -0.056089245 | 0.203809 | 0.266413 |
| OR11H6  | 0.01910244   | 0.665386 | 0.723992 |
| OR12D2  | 0.006593434  | 0.881343 | 0.906934 |
| OR13A1  | -0.153867091 | 0.000458 | 0.001034 |
| OR13C2  | -0.110159554 | 0.012368 | 0.021514 |
| OR13C3  | 0.038408295  | 0.384396 | 0.459033 |
| OR13C5  | -0.103515909 | 0.018786 | 0.03148  |
| OR13C9  | -0.086857339 | 0.048834 | 0.074865 |
| OR13D1  | 0.007645392  | 0.862587 | 0.891949 |
| OR13F1  | -0.032296567 | 0.464574 | 0.538407 |
| OR13G1  | 0.042397512  | 0.336931 | 0.410871 |
| OR13H1  | 0.02180464   | 0.621531 | 0.684698 |
| OR13J1  | -0.199243879 | 5.21E-06 | 1.63E-05 |
| OR14A16 | -0.009704826 | 0.826099 | 0.861553 |
| OR14C36 | 0.067460965  | 0.126276 | 0.174853 |
| OR14I1  | -0.013862822 | 0.753636 | 0.80122  |
| OR1A2   | -0.025117965 | 0.569545 | 0.637798 |
| OR1B1   | -0.108782283 | 0.013511 | 0.023328 |
| OR1C1   | -0.006350418 | 0.885686 | 0.910388 |
| OR1D2   | -0.018965474 | 0.667641 | 0.725892 |
| OR1D4   | -0.064378205 | 0.144582 | 0.197414 |
| OR1E1   | -0.059386994 | 0.178426 | 0.237457 |

|        |              |          |          |
|--------|--------------|----------|----------|
| OR1E2  | -0.074334589 | 0.091959 | 0.131892 |
| OR1F1  | 0.268891148  | 5.58E-10 | 3.22E-09 |
| OR1F2P | 0.157679345  | 0.000328 | 0.00076  |
| OR1G1  | -0.035829577 | 0.417143 | 0.49188  |
| OR1J1  | 0.026849665  | 0.543224 | 0.613999 |
| OR1J2  | 0.069050816  | 0.117566 | 0.164201 |
| OR1J4  | 0.023109465  | 0.600812 | 0.666032 |
| OR1K1  | -0.106552818 | 0.01556  | 0.026518 |
| OR1L1  | -0.025946226 | 0.55688  | 0.626283 |
| OR1L3  | -0.012348095 | 0.779821 | 0.82284  |
| OR1L4  | -0.084138889 | 0.056371 | 0.085204 |
| OR1L6  | -0.021376397 | 0.628397 | 0.690929 |
| OR1L8  | -0.172216542 | 8.56E-05 | 0.00022  |
| OR1M1  | -0.037469629 | 0.39613  | 0.47102  |
| OR1N1  | -0.056218877 | 0.202764 | 0.265377 |
| OR1N2  | 0.000809473  | 0.985379 | 0.988991 |
| OR1Q1  | -0.003461356 | 0.937542 | 0.950782 |
| OR2A12 | 0.002290812  | 0.95864  | 0.968378 |
| OR2A14 | -0.013534744 | 0.759285 | 0.805894 |
| OR2A1  | -0.267869007 | 6.52E-10 | 3.73E-09 |
| OR2A25 | -0.044289518 | 0.315794 | 0.388149 |
| OR2A2  | -0.030187525 | 0.494256 | 0.567574 |
| OR2A4  | -0.129009725 | 0.003359 | 0.006501 |
| OR2A5  | -0.036268676 | 0.411454 | 0.486147 |
| OR2A7  | -0.110349085 | 0.012218 | 0.021282 |
| OR2A9P | -0.134942642 | 0.002148 | 0.00431  |
| OR2AE1 | -0.050300047 | 0.254521 | 0.323069 |
| OR2AG1 | 0.008570689  | 0.846152 | 0.878226 |
| OR2AG2 | 0.020916335  | 0.63581  | 0.697144 |
| OR2AK2 | -0.026539044 | 0.5479   | 0.618271 |
| OR2AT4 | 0.020121407  | 0.648704 | 0.708773 |
| OR2B11 | -0.145551844 | 0.000924 | 0.001976 |
| OR2B2  | 0.016123244  | 0.71509  | 0.76808  |
| OR2B3  | -0.004059811 | 0.926771 | 0.94276  |
| OR2B6  | 0.154863638  | 0.00042  | 0.000955 |
| OR2C1  | -0.148013453 | 0.000753 | 0.001639 |
| OR2C3  | 0.06614445   | 0.13386  | 0.184397 |
| OR2D2  | -0.055455171 | 0.208976 | 0.272331 |
| OR2D3  | -0.067957717 | 0.123502 | 0.171541 |
| OR2F1  | 0.019574347  | 0.657639 | 0.716955 |
| OR2F2  | 0.047930234  | 0.277616 | 0.348139 |
| OR2G2  | -0.041158941 | 0.351248 | 0.42581  |
| OR2G6  | -0.016160837 | 0.714454 | 0.767687 |
| OR2H1  | 0.018112365  | 0.681755 | 0.738786 |

|        |              |          |          |
|--------|--------------|----------|----------|
| OR2H2  | -0.035878444 | 0.416508 | 0.491267 |
| OR2J2  | -0.057885808 | 0.189673 | 0.250244 |
| OR2J3  | -0.019855895 | 0.653034 | 0.712803 |
| OR2K2  | -0.107581927 | 0.014583 | 0.025028 |
| OR2L13 | -0.084453249 | 0.055452 | 0.083968 |
| OR2L1P | 0.004619811  | 0.916704 | 0.934804 |
| OR2L2  | -2.40E-05    | 0.999567 | 0.999867 |
| OR2L3  | -0.014049456 | 0.750429 | 0.798614 |
| OR2M3  | 0.097569573  | 0.026821 | 0.043536 |
| OR2M4  | 0.053889589  | 0.222137 | 0.287012 |
| OR2S2  | 0.078080882  | 0.076671 | 0.11237  |
| OR2T10 | -0.143140331 | 0.001125 | 0.002371 |
| OR2T2  | -0.021435916 | 0.627441 | 0.690078 |
| OR2T33 | 0.026029746  | 0.555611 | 0.625066 |
| OR2T34 | -6.45E-05    | 0.998834 | 0.999284 |
| OR2T3  | -0.076440688 | 0.083089 | 0.120595 |
| OR2T4  | 0.023214226  | 0.599162 | 0.664561 |
| OR2T5  | -0.02555637  | 0.562824 | 0.632007 |
| OR2T6  | 0.019349639  | 0.661323 | 0.720199 |
| OR2T8  | 0.037245438  | 0.398964 | 0.473658 |
| OR2V2  | -0.018551963 | 0.674468 | 0.732296 |
| OR2W1  | 0.016334105  | 0.711529 | 0.765366 |
| OR2W3  | -0.018792244 | 0.670498 | 0.728404 |
| OR2W5  | -0.016351062 | 0.711243 | 0.765141 |
| OR2Z1  | 0.038790006  | 0.379685 | 0.454385 |
| OR3A1  | -0.054412383 | 0.217678 | 0.282016 |
| OR3A2  | -0.096966655 | 0.027781 | 0.044926 |
| OR3A3  | -0.069439287 | 0.115511 | 0.161739 |
| OR3A4  | -0.007686467 | 0.861856 | 0.891424 |
| OR4A16 | 0.039766552  | 0.367796 | 0.442435 |
| OR4A47 | 0.0163537    | 0.711198 | 0.765134 |
| OR4C3  | 0.00218028   | 0.960634 | 0.969853 |
| OR4C6  | 0.129022515  | 0.003356 | 0.006497 |
| OR4D10 | -0.11151858  | 0.011325 | 0.019882 |
| OR4D1  | -0.046265027 | 0.294671 | 0.366035 |
| OR4D2  | -0.041499916 | 0.347269 | 0.421625 |
| OR4D5  | -0.013582055 | 0.75847  | 0.805242 |
| OR4D6  | 0.013301495  | 0.763309 | 0.809605 |
| OR4E2  | -0.096392262 | 0.028723 | 0.046303 |
| OR4F21 | -0.028706395 | 0.51569  | 0.587898 |
| OR4F29 | -0.065583165 | 0.137199 | 0.188438 |
| OR4F4  | 0.043513602  | 0.324355 | 0.39745  |
| OR4F5  | -0.024451983 | 0.579826 | 0.646884 |
| OR4F6  | -0.06884255  | 0.118679 | 0.16555  |

|        |              |          |          |
|--------|--------------|----------|----------|
| OR4K17 | -0.045426607 | 0.303517 | 0.375322 |
| OR4K1  | -0.015481934 | 0.725957 | 0.777622 |
| OR4M2  | -0.029948788 | 0.497679 | 0.570684 |
| OR4N2  | -0.074887936 | 0.089558 | 0.128867 |
| OR4N3P | -0.062040657 | 0.159766 | 0.215463 |
| OR4N4  | -0.019250097 | 0.662958 | 0.721704 |
| OR4X2  | -0.028411604 | 0.520013 | 0.592191 |
| OR51A7 | -0.001259295 | 0.977257 | 0.983159 |
| OR51B2 | 0.09969053   | 0.023668 | 0.038818 |
| OR51B4 | 0.037701522  | 0.393211 | 0.468106 |
| OR51B5 | 0.061745009  | 0.161769 | 0.217784 |
| OR51B6 | -0.047079522 | 0.286243 | 0.357232 |
| OR51E1 | 0.342119182  | 1.38E-15 | 1.87E-14 |
| OR51E2 | 0.141452737  | 0.001289 | 0.002688 |
| OR51F2 | 0.019342425  | 0.661441 | 0.720259 |
| OR51G2 | 0.004117299  | 0.925737 | 0.942092 |
| OR51I1 | -0.150542505 | 0.000609 | 0.001345 |
| OR51I2 | -0.038254671 | 0.386301 | 0.461061 |
| OR51M1 | -0.010834628 | 0.806235 | 0.845026 |
| OR51Q1 | -0.014773694 | 0.738023 | 0.788098 |
| OR51T1 | 0.026599279  | 0.546992 | 0.617385 |
| OR52A1 | 0.042754752  | 0.332872 | 0.406591 |
| OR52A4 | 0.12729748   | 0.003809 | 0.007294 |
| OR52A5 | 0.05178924   | 0.240709 | 0.307824 |
| OR52B2 | 0.021433415  | 0.627481 | 0.690078 |
| OR52B4 | 0.025476524  | 0.564045 | 0.633023 |
| OR52B6 | -0.147081613 | 0.000814 | 0.00176  |
| OR52D1 | -0.107145991 | 0.01499  | 0.025674 |
| OR52E2 | 0.17720647   | 5.26E-05 | 0.00014  |
| OR52E4 | 0.024385083  | 0.580864 | 0.647825 |
| OR52E6 | 0.081614872  | 0.064209 | 0.095784 |
| OR52E8 | 0.063204321  | 0.152063 | 0.206232 |
| OR52H1 | -0.142042797 | 0.001229 | 0.002573 |
| OR52I1 | 0.059209315  | 0.17973  | 0.238923 |
| OR52I2 | 0.014322567  | 0.745743 | 0.794475 |
| OR52K1 | -0.049722729 | 0.26002  | 0.328859 |
| OR52K2 | -0.156343995 | 0.000369 | 0.000846 |
| OR52L1 | -0.005576166 | 0.899544 | 0.921584 |
| OR52M1 | -0.006538407 | 0.882326 | 0.907759 |
| OR52N1 | -0.048745194 | 0.269518 | 0.339283 |
| OR52N2 | -0.084178716 | 0.056253 | 0.085046 |
| OR52N4 | -0.324183173 | 4.57E-14 | 4.87E-13 |
| OR52N5 | 0.016993486  | 0.700434 | 0.755955 |
| OR52R1 | -0.012186779 | 0.782625 | 0.825232 |



|        |              |          |          |
|--------|--------------|----------|----------|
| OR52W1 | -0.044754595 | 0.310734 | 0.382801 |
| OR56A1 | 0.057768444  | 0.190574 | 0.25125  |
| OR56A3 | 0.103220284  | 0.019129 | 0.032001 |
| OR56A4 | 0.044996396  | 0.308124 | 0.380055 |
| OR56A5 | 0.002806941  | 0.949333 | 0.960481 |
| OR56B1 | -0.304060477 | 1.78E-12 | 1.49E-11 |
| OR56B4 | -0.005950299 | 0.892844 | 0.916169 |
| OR5A1  | -0.094582451 | 0.031872 | 0.050834 |
| OR5A2  | -0.039169869 | 0.375032 | 0.449895 |
| OR5AC2 | 0.017526558  | 0.691511 | 0.747667 |
| OR5AK2 | -0.143805582 | 0.001066 | 0.002255 |
| OR5AN1 | -0.050271577 | 0.25479  | 0.323287 |
| OR5AU1 | -0.114749292 | 0.009151 | 0.016356 |
| OR5B12 | 0.002385006  | 0.956941 | 0.967101 |
| OR5B21 | 0.012432165  | 0.778361 | 0.82169  |
| OR5B2  | -0.04322696  | 0.327555 | 0.40088  |
| OR5B3  | 0.08339222   | 0.058602 | 0.088223 |
| OR5C1  | -0.110631194 | 0.011997 | 0.020921 |
| OR5E1P | -0.081404265 | 0.064902 | 0.09671  |
| OR5H1  | 0.006042728  | 0.891189 | 0.914947 |
| OR5H2  | -0.049140666 | 0.265647 | 0.335001 |
| OR5H6  | -0.023830072 | 0.589505 | 0.655669 |
| OR5K1  | -0.14804559  | 0.000751 | 0.001636 |
| OR5K2  | -0.250031386 | 8.82E-09 | 4.26E-08 |
| OR5M11 | 0.033918321  | 0.44244  | 0.51671  |
| OR5M1  | 0.046504593  | 0.292175 | 0.363455 |
| OR5P2  | -0.100815549 | 0.022129 | 0.036552 |
| OR5P3  | -0.10402641  | 0.018206 | 0.0306   |
| OR5T2  | -0.006293715 | 0.8867   | 0.911086 |
| OR5T3  | -0.038568155 | 0.382418 | 0.457027 |
| OR5V1  | 0.030125943  | 0.495138 | 0.56839  |
| OR6A2  | -0.025552032 | 0.562891 | 0.632046 |
| OR6B1  | 0.067081485  | 0.128427 | 0.177548 |
| OR6B2  | 0.034981913  | 0.428256 | 0.502819 |
| OR6B3  | -0.006191921 | 0.88852  | 0.912581 |
| OR6C2  | -0.04210068  | 0.340328 | 0.414482 |
| OR6C3  | -0.018771037 | 0.670848 | 0.728666 |
| OR6C6  | 0.047039689  | 0.286651 | 0.357607 |
| OR6C70 | -0.052136377 | 0.237567 | 0.304253 |
| OR6C75 | 0.026426924  | 0.549593 | 0.619901 |
| OR6C76 | -0.088284085 | 0.045228 | 0.069836 |
| OR6F1  | 0.119911749  | 0.006441 | 0.011849 |
| OR6K3  | -0.187683925 | 1.81E-05 | 5.22E-05 |
| OR6K6  | 0.02004788   | 0.649902 | 0.70981  |

|          |              |          |          |
|----------|--------------|----------|----------|
| OR6M1    | 0.012579576  | 0.775802 | 0.819638 |
| OR6N1    | -0.113676351 | 0.009828 | 0.017481 |
| OR6N2    | -0.022158867 | 0.615875 | 0.679479 |
| OR6S1    | -0.104911879 | 0.017237 | 0.029086 |
| OR6T1    | -0.023372819 | 0.596669 | 0.66247  |
| OR6V1    | -0.021382957 | 0.628292 | 0.690851 |
| OR6W1P   | -0.002038138 | 0.963198 | 0.971706 |
| OR7A5    | 0.044808136  | 0.310155 | 0.382158 |
| OR7C1    | -0.025431831 | 0.56473  | 0.633613 |
| OR7D2    | -0.065125077 | 0.139971 | 0.191784 |
| OR7D4    | -0.013723439 | 0.756035 | 0.803169 |
| OR7E156P | 0.046091225  | 0.29649  | 0.367838 |
| OR7E24   | -0.072979093 | 0.098058 | 0.139799 |
| OR7E37P  | -0.146450328 | 0.000858 | 0.001846 |
| OR7E5P   | 0.057631841  | 0.191627 | 0.252471 |
| OR7E91P  | 0.067316964  | 0.127089 | 0.17589  |
| OR7G2    | -0.047211287 | 0.284895 | 0.355794 |
| OR7G3    | -0.040194537 | 0.362659 | 0.437256 |
| OR8A1    | 0.037322738  | 0.397986 | 0.472664 |
| OR8B12   | -0.009807794 | 0.824284 | 0.860072 |
| OR8B2    | 0.104741804  | 0.017419 | 0.029365 |
| OR8B3    | 0.048582074  | 0.271126 | 0.34107  |
| OR8B4    | 0.041384201  | 0.348616 | 0.423081 |
| OR8D1    | -0.002448504 | 0.955796 | 0.966139 |
| OR8D2    | 0.076979031  | 0.080937 | 0.117856 |
| OR8G2    | -0.000155828 | 0.997185 | 0.998134 |
| OR8G5    | 0.04847092   | 0.272225 | 0.342216 |
| OR8K3    | 0.051412487  | 0.244152 | 0.311554 |
| OR8S1    | 0.135227095  | 0.002102 | 0.004224 |
| OR9A2    | -0.058049616 | 0.188421 | 0.248871 |
| OR9A4    | -0.034407316 | 0.435886 | 0.510427 |
| OR9G4    | -0.14754983  | 0.000783 | 0.001698 |
| OR9G9    | 0.034230678  | 0.438247 | 0.512471 |
| OR9K2    | 0.049767227  | 0.259593 | 0.328423 |
| OR9Q1    | 0.038070294  | 0.388596 | 0.463441 |
| ORAI1    | 0.071456682  | 0.105288 | 0.148791 |
| ORAI2    | -0.051540911 | 0.242975 | 0.310305 |
| ORAI3    | -0.161169638 | 0.00024  | 0.000571 |
| ORAOV1   | -0.046118578 | 0.296203 | 0.367528 |
| ORC1L    | 0.473587688  | 3.78E-30 | 4.34E-28 |
| ORC2L    | 0.259327867  | 2.33E-09 | 1.22E-08 |
| ORC3L    | -0.010531143 | 0.811559 | 0.849574 |
| ORC4L    | 0.19016432   | 1.39E-05 | 4.09E-05 |
| ORC5L    | 0.381003695  | 3.08E-19 | 7.25E-18 |

|          |              |          |          |
|----------|--------------|----------|----------|
| ORC6L    | 0.442025707  | 4.80E-26 | 3.12E-24 |
| ORM1     | -0.076914677 | 0.081191 | 0.118163 |
| ORM2     | -0.06046941  | 0.170628 | 0.228311 |
| ORMDL1   | -0.155498311 | 0.000397 | 0.000906 |
| ORMDL2   | 0.313032352  | 3.59E-13 | 3.37E-12 |
| ORMDL3   | -0.429481065 | 1.57E-24 | 8.08E-23 |
| OS9      | -0.131583015 | 0.002773 | 0.005447 |
| OSBP2    | -0.163457569 | 0.000195 | 0.000472 |
| OSBPL10  | 0.145080925  | 0.00096  | 0.002048 |
| OSBPL11  | -0.06138806  | 0.164212 | 0.220687 |
| OSBPL1A  | -0.120184804 | 0.00632  | 0.011644 |
| OSBPL2   | -0.113053336 | 0.010241 | 0.018145 |
| OSBPL3   | -0.009075707 | 0.837209 | 0.87068  |
| OSBPL5   | -0.079059085 | 0.07304  | 0.107489 |
| OSBPL6   | -0.228559201 | 1.57E-07 | 6.27E-07 |
| OSBPL7   | -0.356741218 | 6.69E-17 | 1.10E-15 |
| OSBPL8   | 0.196739811  | 6.86E-06 | 2.10E-05 |
| OSBPL9   | -0.003163379 | 0.942909 | 0.95461  |
| OSBP     | 0.035393254  | 0.422842 | 0.497397 |
| OSCAR    | -0.250765071 | 7.96E-09 | 3.86E-08 |
| OSCP1    | -0.227244151 | 1.86E-07 | 7.34E-07 |
| OSGEPL1  | -0.00103472  | 0.981312 | 0.986121 |
| OSGEP    | -0.008455558 | 0.848193 | 0.880117 |
| OSGIN1   | 0.129980763  | 0.003126 | 0.006084 |
| OSGIN2   | 0.255958948  | 3.79E-09 | 1.92E-08 |
| OSMR     | 0.025496199  | 0.563744 | 0.632827 |
| OSM      | -0.065926402 | 0.13515  | 0.185981 |
| OSR1     | -0.298991046 | 4.27E-12 | 3.36E-11 |
| OSR2     | 0.094017846  | 0.032913 | 0.052323 |
| OST4     | 0.178158799  | 4.79E-05 | 0.000128 |
| OSTBETA  | 0.031109457  | 0.481158 | 0.554988 |
| OSTCL    | 0.209564502  | 1.61E-06 | 5.45E-06 |
| OSTC     | 0.416595355  | 4.88E-23 | 2.00E-21 |
| OSTF1    | 0.029328065  | 0.506636 | 0.579327 |
| OSTM1    | -0.063798081 | 0.148243 | 0.201708 |
| OSTN     | 0.035256132  | 0.424642 | 0.49928  |
| OSTalpha | -0.060538043 | 0.170142 | 0.227783 |
| OTC      | -0.303984871 | 1.80E-12 | 1.51E-11 |
| OTOA     | -0.239679359 | 3.66E-08 | 1.61E-07 |
| OTOF     | -0.010683307 | 0.808888 | 0.84716  |
| OTOL1    | -0.057064476 | 0.196044 | 0.257509 |
| OTOP1    | -0.022607011 | 0.608754 | 0.673294 |
| OTOP2    | 0.09151359   | 0.037886 | 0.059468 |
| OTOP3    | 0.061326357  | 0.164637 | 0.221199 |

|        |              |          |          |
|--------|--------------|----------|----------|
| OTOR   | 0.03919923   | 0.374674 | 0.449519 |
| OTOS   | 0.048080136  | 0.276114 | 0.34656  |
| OTP    | 0.034383737  | 0.4362   | 0.510706 |
| OTUB1  | 0.116312403  | 0.008239 | 0.014861 |
| OTUB2  | 0.287219051  | 3.08E-11 | 2.14E-10 |
| OTUD1  | -0.275403741 | 2.04E-10 | 1.25E-09 |
| OTUD3  | -0.345754803 | 6.59E-16 | 9.35E-15 |
| OTUD4  | -0.023877032 | 0.588772 | 0.654999 |
| OTUD5  | -0.196111178 | 7.35E-06 | 2.24E-05 |
| OTUD6A | 0.012695391  | 0.773794 | 0.818208 |
| OTUD6B | 0.364646263  | 1.22E-17 | 2.24E-16 |
| OTUD7A | -0.198255576 | 5.81E-06 | 1.80E-05 |
| OTUD7B | -0.122430841 | 0.005401 | 0.010087 |
| OTX1   | 0.162683474  | 0.000209 | 0.000505 |
| OTX2   | 0.088260381  | 0.045286 | 0.069914 |
| OVCA2  | 0.24174917   | 2.77E-08 | 1.24E-07 |
| OVCH1  | -0.280779283 | 8.73E-11 | 5.68E-10 |
| OVCH2  | -0.26973263  | 4.91E-10 | 2.85E-09 |
| OVGP1  | -0.176391288 | 5.70E-05 | 0.00015  |
| OVOL1  | -0.016396632 | 0.710474 | 0.76452  |
| OVOL2  | -0.044962377 | 0.308491 | 0.380413 |
| OXA1L  | 0.142353667  | 0.001199 | 0.002513 |
| OXCT1  | -0.114970153 | 0.009017 | 0.016128 |
| OXCT2  | -0.070952948 | 0.107771 | 0.151977 |
| OXER1  | -0.398525951 | 4.74E-21 | 1.45E-19 |
| OXGR1  | -0.015792081 | 0.720694 | 0.773062 |
| OXNAD1 | 0.152156323  | 0.000531 | 0.001185 |
| OXR1   | -0.073291106 | 0.096626 | 0.137925 |
| OXSM   | 0.182267302  | 3.17E-05 | 8.73E-05 |
| OXSR1  | 0.116227104  | 0.008287 | 0.014938 |
| OXTR   | -0.015966518 | 0.71774  | 0.770514 |
| OXT    | -0.062312293 | 0.157942 | 0.213307 |
| P2RX1  | -0.229822073 | 1.34E-07 | 5.40E-07 |
| P2RX2  | -0.329569065 | 1.64E-14 | 1.87E-13 |
| P2RX3  | -0.055153999 | 0.211463 | 0.275087 |
| P2RX4  | -0.143540407 | 0.001089 | 0.002301 |
| P2RX5  | 0.058462463  | 0.185293 | 0.245157 |
| P2RX6  | -0.257936412 | 2.85E-09 | 1.47E-08 |
| P2RX7  | -0.264826846 | 1.03E-09 | 5.72E-09 |
| P2RY10 | -0.08998766  | 0.041218 | 0.064235 |
| P2RY11 | -0.193267692 | 1.00E-05 | 3.00E-05 |
| P2RY12 | -0.300749249 | 3.16E-12 | 2.54E-11 |
| P2RY13 | -0.267054657 | 7.37E-10 | 4.18E-09 |
| P2RY14 | -0.214602842 | 8.85E-07 | 3.13E-06 |

|           |              |          |          |
|-----------|--------------|----------|----------|
| P2RY1     | -0.059617972 | 0.17674  | 0.235606 |
| P2RY2     | -0.150228278 | 0.000625 | 0.001379 |
| P2RY4     | -0.05927389  | 0.179255 | 0.238371 |
| P2RY6     | 0.108396366  | 0.013848 | 0.023868 |
| P2RY8     | -0.20172503  | 3.94E-06 | 1.26E-05 |
| P4HA1     | 0.3214024    | 7.70E-14 | 7.94E-13 |
| P4HA2     | 0.089275771  | 0.042856 | 0.066506 |
| P4HA3     | 0.189147518  | 1.55E-05 | 4.52E-05 |
| P4HB      | 0.154368899  | 0.000438 | 0.000994 |
| P4HTM     | -0.273099823 | 2.92E-10 | 1.76E-09 |
| P704P     | 0.129033215  | 0.003353 | 0.006493 |
| PA2G4P4   | 0.351194261  | 2.15E-16 | 3.25E-15 |
| PA2G4     | 0.492957538  | 6.89E-33 | 1.24E-30 |
| PAAF1     | 0.068089739  | 0.122773 | 0.170719 |
| PABPC1L2A | -0.095634983 | 0.030006 | 0.048194 |
| PABPC1L2B | -0.111833477 | 0.011094 | 0.019504 |
| PABPC1L   | -0.259308764 | 2.33E-09 | 1.22E-08 |
| PABPC1P2  | 0.136658452  | 0.001881 | 0.003808 |
| PABPC1    | 0.285500775  | 4.08E-11 | 2.78E-10 |
| PABPC3    | 0.294108656  | 9.80E-12 | 7.35E-11 |
| PABPC4L   | -0.028637515 | 0.516699 | 0.58888  |
| PABPC4    | -0.011788018 | 0.789568 | 0.83115  |
| PABPC5    | -0.100598583 | 0.022419 | 0.03697  |
| PABPN1L   | -0.103919217 | 0.018326 | 0.030782 |
| PABPN1    | 0.004895609  | 0.911751 | 0.93094  |
| PACRGL    | 0.137791416  | 0.001722 | 0.003512 |
| PACRG     | -0.226712092 | 1.99E-07 | 7.82E-07 |
| PACS1     | 0.1530015    | 0.000494 | 0.001107 |
| PACS2     | -0.108029493 | 0.014175 | 0.024393 |
| PACSIN1   | -0.000579662 | 0.98953  | 0.99231  |
| PACSIN2   | -0.140660192 | 0.001373 | 0.002849 |
| PACSIN3   | -0.089095617 | 0.043279 | 0.067069 |
| PADI1     | 0.027203613  | 0.53792  | 0.608692 |
| PADI2     | -0.272972981 | 2.98E-10 | 1.79E-09 |
| PADI3     | 0.039232426  | 0.37427  | 0.449195 |
| PADI4     | -0.040704676 | 0.356595 | 0.43114  |
| PADI6     | -0.060649289 | 0.169357 | 0.226838 |
| PAEP      | 0.27073895   | 4.21E-10 | 2.47E-09 |
| PAF1      | -0.035474518 | 0.421777 | 0.496392 |
| PAFAH1B1  | -0.097374375 | 0.027129 | 0.04396  |
| PAFAH1B2  | 0.207628016  | 2.01E-06 | 6.71E-06 |
| PAFAH1B3  | 0.248188365  | 1.14E-08 | 5.41E-08 |
| PAFAH2    | -0.005094794 | 0.908176 | 0.928191 |
| PAG1      | -0.268270082 | 6.13E-10 | 3.52E-09 |

|             |              |          |          |
|-------------|--------------|----------|----------|
| PAGE1       | 0.094192641  | 0.032587 | 0.051876 |
| PAGE2B      | 0.049005728  | 0.266964 | 0.336555 |
| PAGE2       | 0.093144588  | 0.03458  | 0.054721 |
| PAGE3       | -0.059113648 | 0.180436 | 0.23967  |
| PAGE4       | 0.045310107  | 0.30476  | 0.376556 |
| PAGE5       | 0.022126858  | 0.616386 | 0.679967 |
| PAH         | 0.203302755  | 3.30E-06 | 1.06E-05 |
| PAICS       | 0.525317605  | 7.13E-38 | 3.66E-35 |
| PAIP1       | 0.265718379  | 9.02E-10 | 5.05E-09 |
| PAIP2B      | -0.109806717 | 0.012653 | 0.021965 |
| PAIP2       | 0.018992676  | 0.667193 | 0.725642 |
| PAK1IP1     | 0.489947499  | 1.89E-32 | 3.22E-30 |
| PAK1        | 0.159945389  | 0.000268 | 0.000632 |
| PAK2        | 0.261343378  | 1.73E-09 | 9.23E-09 |
| PAK3        | 0.024425363  | 0.580239 | 0.647236 |
| PAK4        | 0.040952161  | 0.353676 | 0.428311 |
| PAK6        | -0.238015842 | 4.58E-08 | 1.98E-07 |
| PAK7        | -0.250667893 | 8.07E-09 | 3.91E-08 |
| PALB2       | 0.145426452  | 0.000933 | 0.001995 |
| PALLD       | 0.089087635  | 0.043298 | 0.067088 |
| PALM2-AKAP2 | -0.027373925 | 0.535376 | 0.60657  |
| PALM2       | -0.065182204 | 0.139623 | 0.191372 |
| PALM3       | -0.282236169 | 6.92E-11 | 4.56E-10 |
| PALMD       | -0.266110682 | 8.50E-10 | 4.78E-09 |
| PALM        | -0.294429518 | 9.29E-12 | 6.99E-11 |
| PAMR1       | -0.158127625 | 0.000315 | 0.000733 |
| PAM         | -0.124932041 | 0.00452  | 0.008553 |
| PAN2        | -0.260879881 | 1.85E-09 | 9.84E-09 |
| PAN3        | -0.172636071 | 8.22E-05 | 0.000212 |
| PANK1       | 0.142284492  | 0.001205 | 0.002527 |
| PANK2       | -0.006376414 | 0.885221 | 0.910034 |
| PANK3       | 0.218797058  | 5.33E-07 | 1.96E-06 |
| PANK4       | -0.124396674 | 0.004697 | 0.008869 |
| PANX1       | 0.250378128  | 8.40E-09 | 4.07E-08 |
| PANX2       | -0.019095839 | 0.665494 | 0.724071 |
| PANX3       | 0.047656504  | 0.280372 | 0.351023 |
| PAOX        | -0.254639537 | 4.59E-09 | 2.29E-08 |
| PAPD4       | -0.109753695 | 0.012696 | 0.02203  |
| PAPD5       | 0.100050473  | 0.023166 | 0.038101 |
| PAPD7       | -0.117962014 | 0.007366 | 0.013413 |
| PAPLN       | -0.355401455 | 8.88E-17 | 1.42E-15 |
| PAPL        | 0.074146172  | 0.092788 | 0.132883 |
| PAPOLA      | 0.298200294  | 4.89E-12 | 3.82E-11 |
| PAPOLB      | 0.033372933  | 0.449816 | 0.52419  |

|        |              |          |          |
|--------|--------------|----------|----------|
| PAPOLG | 0.071252727  | 0.106288 | 0.150066 |
| PAPPA2 | -0.006789006 | 0.877851 | 0.904598 |
| PAPPA  | -0.012789484 | 0.772163 | 0.816744 |
| PAPSS1 | -0.142471689 | 0.001187 | 0.002492 |
| PAPSS2 | -0.19628929  | 7.21E-06 | 2.20E-05 |
| PAQR3  | 0.220462259  | 4.34E-07 | 1.62E-06 |
| PAQR4  | 0.059334462  | 0.178811 | 0.237906 |
| PAQR5  | -0.032863823 | 0.456763 | 0.530863 |
| PAQR6  | -0.116656213 | 0.00805  | 0.014556 |
| PAQR7  | -0.029300747 | 0.507032 | 0.579647 |
| PAQR8  | -0.224726055 | 2.56E-07 | 9.87E-07 |
| PAQR9  | 0.232939073  | 8.94E-08 | 3.71E-07 |
| PAR-SN | -0.168414796 | 0.000123 | 0.000308 |
| PAR1   | -0.152039491 | 0.000536 | 0.001195 |
| PAR4   | -0.08428507  | 0.055942 | 0.084633 |
| PAR5   | -0.18946278  | 1.50E-05 | 4.38E-05 |
| PARD3B | -0.310408232 | 5.77E-13 | 5.25E-12 |
| PARD3  | 0.245955629  | 1.56E-08 | 7.23E-08 |
| PARD6A | -0.06576661  | 0.136101 | 0.187135 |
| PARD6B | -0.18043463  | 3.81E-05 | 0.000104 |
| PARD6G | 0.082114578  | 0.06259  | 0.093648 |
| PARG   | 0.228947965  | 1.50E-07 | 5.99E-07 |
| PARK2  | -0.185627315 | 2.24E-05 | 6.35E-05 |
| PARK7  | 0.129910955  | 0.003142 | 0.006113 |
| PARL   | 0.22370353   | 2.91E-07 | 1.11E-06 |
| PARM1  | -0.25573497  | 3.92E-09 | 1.98E-08 |
| PARN   | -0.174946506 | 6.57E-05 | 0.000172 |
| PARP10 | -0.217488317 | 6.25E-07 | 2.27E-06 |
| PARP11 | -0.134219298 | 0.002271 | 0.004533 |
| PARP12 | 0.041479517  | 0.347506 | 0.421838 |
| PARP14 | -0.224017589 | 2.79E-07 | 1.07E-06 |
| PARP15 | -0.309674901 | 6.57E-13 | 5.92E-12 |
| PARP16 | -0.209725125 | 1.58E-06 | 5.35E-06 |
| PARP1  | 0.172637798  | 8.22E-05 | 0.000212 |
| PARP2  | 0.229879026  | 1.33E-07 | 5.37E-07 |
| PARP3  | -0.306435812 | 1.17E-12 | 1.01E-11 |
| PARP4  | -0.110678571 | 0.01196  | 0.020866 |
| PARP6  | -0.149456899 | 0.000667 | 0.001466 |
| PARP8  | -0.219164906 | 5.09E-07 | 1.88E-06 |
| PARP9  | 0.013567198  | 0.758726 | 0.805419 |
| PARS2  | 0.137718166  | 0.001732 | 0.00353  |
| PART1  | 0.064364762  | 0.144666 | 0.197513 |
| PARVA  | -0.098794061 | 0.024959 | 0.040749 |
| PARVB  | 0.118044186  | 0.007324 | 0.013347 |

|         |              |          |          |
|---------|--------------|----------|----------|
| PARVG   | -0.334347693 | 6.46E-15 | 7.90E-14 |
| PASD1   | 0.098880155  | 0.024833 | 0.040562 |
| PASK    | -0.136957775 | 0.001838 | 0.003728 |
| PATE1   | 0.0455296    | 0.302421 | 0.374105 |
| PATE2   | 0.213277302  | 1.04E-06 | 3.63E-06 |
| PATE3   | -0.020502282 | 0.642512 | 0.703277 |
| PATE4   | 0.054377862  | 0.21797  | 0.28234  |
| PATL1   | 0.237753194  | 4.74E-08 | 2.04E-07 |
| PATL2   | -0.329299969 | 1.72E-14 | 1.96E-13 |
| PATZ1   | -0.102650525 | 0.019806 | 0.033039 |
| PAWR    | 0.438845287  | 1.18E-25 | 7.29E-24 |
| PAX1    | -0.060837043 | 0.168038 | 0.225298 |
| PAX2    | -0.04268031  | 0.333715 | 0.407496 |
| PAX3    | 0.049505756  | 0.262108 | 0.331081 |
| PAX4    | 0.059431623  | 0.178099 | 0.237117 |
| PAX5    | -0.148794677 | 0.000706 | 0.001544 |
| PAX6    | -0.216904549 | 6.71E-07 | 2.42E-06 |
| PAX7    | -0.108483089 | 0.013772 | 0.023755 |
| PAX8    | 0.067909168  | 0.123771 | 0.171813 |
| PAX9    | 0.198549441  | 5.62E-06 | 1.75E-05 |
| PAXIP1  | 0.152539247  | 0.000514 | 0.001149 |
| PBK     | 0.546685267  | 1.80E-41 | 1.91E-38 |
| PBLD    | -0.093107675 | 0.034652 | 0.054826 |
| PBOV1   | -0.226107432 | 2.15E-07 | 8.39E-07 |
| PBRM1   | -0.090938558 | 0.039114 | 0.061184 |
| PBX1    | -0.088944486 | 0.043636 | 0.067571 |
| PBX2    | -0.146524355 | 0.000853 | 0.001835 |
| PBX3    | -0.112700096 | 0.010482 | 0.018526 |
| PBX4    | -0.322737102 | 6.00E-14 | 6.27E-13 |
| PBXIP1  | -0.410163917 | 2.57E-22 | 9.41E-21 |
| PCA3    | -0.060509148 | 0.170347 | 0.227996 |
| PCBD1   | 0.072297375  | 0.101245 | 0.14384  |
| PCBD2   | -0.176613183 | 5.58E-05 | 0.000147 |
| PCBP1   | 0.248762148  | 1.05E-08 | 5.03E-08 |
| PCBP2   | 0.32426597   | 4.50E-14 | 4.80E-13 |
| PCBP3   | -0.19437693  | 8.88E-06 | 2.68E-05 |
| PCBP4   | -0.090825472 | 0.039359 | 0.061525 |
| PCCA    | -0.14844793  | 0.000727 | 0.001586 |
| PCCB    | 0.210972135  | 1.36E-06 | 4.67E-06 |
| PCDH10  | -0.160865427 | 0.000247 | 0.000586 |
| PCDH11X | -0.303714514 | 1.89E-12 | 1.58E-11 |
| PCDH11Y | -0.091372821 | 0.038184 | 0.05986  |
| PCDH12  | -0.126234606 | 0.004115 | 0.007841 |
| PCDH15  | -0.306179645 | 1.22E-12 | 1.06E-11 |



|          |              |          |          |
|----------|--------------|----------|----------|
| PCDH17   | -0.128496651 | 0.003488 | 0.006729 |
| PCDH18   | -0.089382009 | 0.042608 | 0.066142 |
| PCDH19   | -0.175266032 | 6.37E-05 | 0.000167 |
| PCDH1    | -0.107535191 | 0.014626 | 0.025096 |
| PCDH20   | -0.396368451 | 8.03E-21 | 2.37E-19 |
| PCDH7    | 0.032822799  | 0.457325 | 0.531283 |
| PCDH8    | -0.085843456 | 0.05154  | 0.078621 |
| PCDH9    | -0.178674831 | 4.55E-05 | 0.000122 |
| PCDHA10  | -0.206344621 | 2.33E-06 | 7.71E-06 |
| PCDHA11  | 0.013197435  | 0.765106 | 0.810952 |
| PCDHA12  | -0.115995043 | 0.008417 | 0.015148 |
| PCDHA13  | -0.031162052 | 0.480417 | 0.554197 |
| PCDHA1   | 0.132584928  | 0.002571 | 0.005082 |
| PCDHA2   | -0.026501524 | 0.548467 | 0.61877  |
| PCDHA3   | -0.17131642  | 9.33E-05 | 0.000239 |
| PCDHA4   | -0.025198701 | 0.568304 | 0.636766 |
| PCDHA5   | 0.03059879   | 0.48839  | 0.561676 |
| PCDHA6   | -0.011272055 | 0.798576 | 0.83891  |
| PCDHA7   | 0.020117503  | 0.648767 | 0.708803 |
| PCDHA8   | -0.075888249 | 0.085346 | 0.123526 |
| PCDHA9   | -0.030584183 | 0.488598 | 0.561851 |
| PCDHAC1  | -0.01326413  | 0.763954 | 0.810032 |
| PCDHAC2  | -0.171171757 | 9.46E-05 | 0.000242 |
| PCDHB10  | -0.037047383 | 0.401478 | 0.476105 |
| PCDHB11  | 0.008609644  | 0.845461 | 0.877692 |
| PCDHB12  | -0.085639211 | 0.0521   | 0.079391 |
| PCDHB13  | 0.059129489  | 0.180319 | 0.239562 |
| PCDHB14  | -0.050148841 | 0.255953 | 0.324537 |
| PCDHB15  | -0.117047197 | 0.007839 | 0.0142   |
| PCDHB16  | -0.046945846 | 0.287615 | 0.358563 |
| PCDHB17  | 0.06085564   | 0.167908 | 0.225154 |
| PCDHB18  | -0.089447411 | 0.042456 | 0.065912 |
| PCDHB19P | -0.057077543 | 0.195941 | 0.257392 |
| PCDHB1   | -0.216779849 | 6.81E-07 | 2.45E-06 |
| PCDHB2   | 0.133968908  | 0.002314 | 0.004613 |
| PCDHB3   | 0.01957285   | 0.657663 | 0.716955 |
| PCDHB4   | -0.192642001 | 1.07E-05 | 3.19E-05 |
| PCDHB5   | 0.085933632  | 0.051294 | 0.078288 |
| PCDHB6   | 0.033071973  | 0.453915 | 0.527983 |
| PCDHB7   | -0.110642797 | 0.011988 | 0.02091  |
| PCDHB8   | 0.172372458  | 8.43E-05 | 0.000217 |
| PCDHB9   | -0.04403802  | 0.318552 | 0.391179 |
| PCDHGA10 | -0.123064419 | 0.005164 | 0.00968  |
| PCDHGA11 | -0.103491137 | 0.018814 | 0.031517 |

|          |              |          |          |
|----------|--------------|----------|----------|
| PCDHGA12 | -0.151878739 | 0.000543 | 0.00121  |
| PCDHGA1  | 0.128566142  | 0.00347  | 0.006699 |
| PCDHGA2  | -0.054776667 | 0.214609 | 0.278727 |
| PCDHGA3  | -0.076783949 | 0.081711 | 0.118799 |
| PCDHGA4  | -0.057043798 | 0.196206 | 0.257689 |
| PCDHGA5  | -0.168376824 | 0.000123 | 0.000309 |
| PCDHGA6  | -0.20205334  | 3.80E-06 | 1.21E-05 |
| PCDHGA7  | -0.040368246 | 0.360587 | 0.435335 |
| PCDHGA8  | 0.035643154  | 0.419573 | 0.494249 |
| PCDHGA9  | -0.16248894  | 0.000213 | 0.000513 |
| PCDHGB1  | 0.15315818   | 0.000487 | 0.001094 |
| PCDHGB2  | -0.071996972 | 0.102675 | 0.145562 |
| PCDHGB3  | -0.078163613 | 0.076359 | 0.11198  |
| PCDHGB4  | 0.041416215  | 0.348243 | 0.42268  |
| PCDHGB5  | 0.058986444  | 0.181377 | 0.240728 |
| PCDHGB6  | -0.173587794 | 7.50E-05 | 0.000194 |
| PCDHGB7  | -0.219902112 | 4.65E-07 | 1.73E-06 |
| PCDHGB8P | -0.100036637 | 0.023185 | 0.038129 |
| PCDHGC3  | -0.192982178 | 1.03E-05 | 3.08E-05 |
| PCDHGC4  | -0.095461313 | 0.030308 | 0.048607 |
| PCDHGC5  | -0.038908761 | 0.378227 | 0.452993 |
| PCDP1    | -0.450295066 | 4.43E-27 | 3.28E-25 |
| PCF11    | -0.314363156 | 2.82E-13 | 2.68E-12 |
| PCGEM1   | 0.018283131  | 0.67892  | 0.736234 |
| PCGF1    | 0.069347839  | 0.115992 | 0.162311 |
| PCGF2    | -0.088101479 | 0.045677 | 0.070457 |
| PCGF3    | -0.162937096 | 0.000204 | 0.000494 |
| PCGF5    | 0.13312813   | 0.002467 | 0.004892 |
| PCGF6    | 0.351487099  | 2.02E-16 | 3.07E-15 |
| PCID2    | 0.087609075  | 0.046905 | 0.072167 |
| PCIF1    | -0.044400306 | 0.314584 | 0.386876 |
| PCK1     | 0.227021459  | 1.91E-07 | 7.53E-07 |
| PCK2     | 0.034265651  | 0.437779 | 0.512044 |
| PCLO     | -0.13778255  | 0.001724 | 0.003514 |
| PCM1     | -0.099325759 | 0.024186 | 0.039596 |
| PCMT1    | 0.196184378  | 7.29E-06 | 2.23E-05 |
| PCMTD1   | -0.04647666  | 0.292465 | 0.363735 |
| PCMTD2   | -0.153800125 | 0.000461 | 0.00104  |
| PCNAP1   | -0.039095711 | 0.375938 | 0.450738 |
| PCNA     | 0.381699631  | 2.62E-19 | 6.27E-18 |
| PCNP     | 0.164133688  | 0.000183 | 0.000446 |
| PCNT     | -0.171114482 | 9.52E-05 | 0.000243 |
| PCNXL2   | -0.146728068 | 0.000838 | 0.001807 |
| PCNXL3   | 0.001665057  | 0.969931 | 0.977413 |

|          |              |          |          |
|----------|--------------|----------|----------|
| PCNX     | -0.101577835 | 0.021137 | 0.035061 |
| PCOLCE2  | 0.063289473  | 0.151511 | 0.205656 |
| PCOLCE   | 0.011123957  | 0.801167 | 0.840704 |
| PCOTH    | -0.059923971 | 0.174525 | 0.232948 |
| PCP2     | -0.307039482 | 1.05E-12 | 9.18E-12 |
| PCP4L1   | -0.228373167 | 1.61E-07 | 6.41E-07 |
| PCP4     | 0.029561529  | 0.503257 | 0.575979 |
| PCSK1N   | -0.173388462 | 7.65E-05 | 0.000198 |
| PCSK1    | 0.299538319  | 3.89E-12 | 3.08E-11 |
| PCSK2    | -0.204293897 | 2.95E-06 | 9.58E-06 |
| PCSK4    | -0.220875738 | 4.13E-07 | 1.54E-06 |
| PCSK5    | -0.219859587 | 4.68E-07 | 1.74E-06 |
| PCSK6    | 0.054028335  | 0.220947 | 0.285696 |
| PCSK7    | -0.237070551 | 5.19E-08 | 2.22E-07 |
| PCSK9    | 0.000204454  | 0.996307 | 0.997535 |
| PCTP     | -0.040827859 | 0.35514  | 0.429667 |
| PCYOX1L  | -0.329068684 | 1.80E-14 | 2.05E-13 |
| PCYOX1   | -0.076538677 | 0.082694 | 0.120105 |
| PCYT1A   | 0.122821132  | 0.005254 | 0.009833 |
| PCYT1B   | -0.170515896 | 0.000101 | 0.000256 |
| PCYT2    | -0.072319065 | 0.101142 | 0.143756 |
| PC       | -0.082177525 | 0.062388 | 0.093396 |
| PDAP1    | 0.232835193  | 9.06E-08 | 3.76E-07 |
| PDCD10   | 0.313380688  | 3.37E-13 | 3.17E-12 |
| PDCD11   | 0.224640129  | 2.58E-07 | 9.97E-07 |
| PDCD1LG2 | 0.013114133  | 0.766545 | 0.812133 |
| PDCD1    | -0.053224273 | 0.227906 | 0.293517 |
| PDCD2L   | 0.334205234  | 6.65E-15 | 8.10E-14 |
| PDCD2    | 0.286887087  | 3.25E-11 | 2.25E-10 |
| PDCD4    | -0.13340225  | 0.002417 | 0.004802 |
| PDCD5    | 0.315373939  | 2.35E-13 | 2.26E-12 |
| PDCD6IP  | -0.006793677 | 0.877767 | 0.904558 |
| PDCD6    | 0.194396284  | 8.86E-06 | 2.67E-05 |
| PDCD7    | -0.053925335 | 0.22183  | 0.286671 |
| PDCL2    | 0.036682308  | 0.406137 | 0.480945 |
| PDCL3    | 0.332001428  | 1.02E-14 | 1.20E-13 |
| PDCL     | 0.169129228  | 0.000115 | 0.00029  |
| PDC      | 0.027689601  | 0.530679 | 0.602203 |
| PDDC1    | -0.214250471 | 9.23E-07 | 3.26E-06 |
| PDE10A   | 0.221109322  | 4.01E-07 | 1.50E-06 |
| PDE11A   | -0.084409166 | 0.05558  | 0.084124 |
| PDE12    | 0.178577771  | 4.59E-05 | 0.000123 |
| PDE1A    | -0.090104166 | 0.040956 | 0.06385  |
| PDE1B    | -0.291417576 | 1.54E-11 | 1.12E-10 |

|         |              |          |          |
|---------|--------------|----------|----------|
| PDE1C   | -0.039107531 | 0.375794 | 0.450646 |
| PDE2A   | -0.191038692 | 1.27E-05 | 3.75E-05 |
| PDE3A   | 0.130229488  | 0.003068 | 0.005982 |
| PDE3B   | -0.050654649 | 0.251183 | 0.319298 |
| PDE4A   | -0.187430858 | 1.86E-05 | 5.34E-05 |
| PDE4B   | -0.106913742 | 0.015211 | 0.025994 |
| PDE4C   | -0.343153434 | 1.12E-15 | 1.54E-14 |
| PDE4DIP | -0.188894227 | 1.59E-05 | 4.63E-05 |
| PDE4D   | 0.058747846  | 0.183152 | 0.242682 |
| PDE5A   | -0.224352587 | 2.68E-07 | 1.03E-06 |
| PDE6A   | 0.083197705  | 0.059195 | 0.089029 |
| PDE6B   | -0.276100442 | 1.83E-10 | 1.13E-09 |
| PDE6C   | -0.024442495 | 0.579974 | 0.646976 |
| PDE6D   | 0.126455682  | 0.004049 | 0.007725 |
| PDE6G   | -0.158443817 | 0.000306 | 0.000714 |
| PDE6H   | -0.022264779 | 0.614189 | 0.678067 |
| PDE7A   | -0.102001269 | 0.020602 | 0.034248 |
| PDE7B   | -0.202022873 | 3.81E-06 | 1.22E-05 |
| PDE8A   | -0.154957433 | 0.000417 | 0.000947 |
| PDE8B   | -0.301994542 | 2.54E-12 | 2.08E-11 |
| PDE9A   | -0.188401897 | 1.68E-05 | 4.86E-05 |
| PDF     | 0.29589428   | 7.25E-12 | 5.55E-11 |
| PDGFA   | -0.119930199 | 0.006433 | 0.011836 |
| PDGFB   | 0.006609966  | 0.881048 | 0.906747 |
| PDGFC   | -0.059016048 | 0.181158 | 0.240469 |
| PDGFD   | -0.14749691  | 0.000787 | 0.001704 |
| PDGFRA  | -0.056476539 | 0.200699 | 0.262898 |
| PDGFRB  | -0.114535428 | 0.009282 | 0.016579 |
| PDGFRL  | 0.079420335  | 0.071734 | 0.105841 |
| PDHA1   | 0.057803404  | 0.190306 | 0.250962 |
| PDHA2   | 0.032563218  | 0.460893 | 0.534823 |
| PDHB    | 0.154396716  | 0.000437 | 0.000992 |
| PDHX    | 0.302087265  | 2.50E-12 | 2.05E-11 |
| PDIA2   | 0.061401965  | 0.164116 | 0.220578 |
| PDIA3P  | 0.195293296  | 8.04E-06 | 2.44E-05 |
| PDIA3   | 0.188824206  | 1.61E-05 | 4.66E-05 |
| PDIA4   | 0.358549783  | 4.55E-17 | 7.65E-16 |
| PDIA5   | 0.093636866  | 0.033631 | 0.053359 |
| PDIA6   | 0.311519429  | 4.72E-13 | 4.33E-12 |
| PDIK1L  | -0.251795202 | 6.88E-09 | 3.36E-08 |
| PDILT   | -0.054456119 | 0.217308 | 0.281628 |
| PDK1    | 0.269423237  | 5.15E-10 | 2.99E-09 |
| PDK2    | -0.449551588 | 5.51E-27 | 4.02E-25 |
| PDK3    | 0.038025625  | 0.389154 | 0.464022 |

|          |              |          |          |
|----------|--------------|----------|----------|
| PDK4     | -0.117489623 | 0.007607 | 0.013811 |
| PDLIM1   | -0.165787873 | 0.000157 | 0.000387 |
| PDLIM2   | -0.306788705 | 1.10E-12 | 9.57E-12 |
| PDLIM3   | -0.024502157 | 0.579049 | 0.646233 |
| PDLIM4   | -0.073191266 | 0.097083 | 0.138527 |
| PDLIM5   | 0.117811885  | 0.007442 | 0.013534 |
| PDLIM7   | 0.046524106  | 0.291972 | 0.363225 |
| PDP1     | 0.027525432  | 0.533119 | 0.604458 |
| PDP2     | -0.06452925  | 0.14364  | 0.196273 |
| PDPK1    | -0.314537293 | 2.73E-13 | 2.60E-12 |
| PDPN     | -0.025120669 | 0.569503 | 0.637798 |
| PDPR     | -0.2287877   | 1.53E-07 | 6.10E-07 |
| PDRG1    | 0.279665946  | 1.04E-10 | 6.70E-10 |
| PDS5A    | 0.107106893  | 0.015027 | 0.025729 |
| PDS5B    | 0.00378064   | 0.931794 | 0.946617 |
| PDSS1    | 0.456872611  | 6.36E-28 | 5.17E-26 |
| PDSS2    | -0.012891496 | 0.770397 | 0.81535  |
| PDX1     | 0.125605255  | 0.004306 | 0.008177 |
| PDXDC1   | -0.052166575 | 0.237295 | 0.303983 |
| PDXDC2   | -0.302969989 | 2.15E-12 | 1.78E-11 |
| PDXK     | -0.11049797  | 0.012101 | 0.021091 |
| PDXP     | 0.165786961  | 0.000157 | 0.000387 |
| PDYN     | -0.085464219 | 0.052583 | 0.080055 |
| PDZD11   | 0.266661623  | 7.82E-10 | 4.42E-09 |
| PDZD2    | -0.402018112 | 2.00E-21 | 6.54E-20 |
| PDZD3    | -0.018952228 | 0.667859 | 0.726042 |
| PDZD4    | -0.387692664 | 6.45E-20 | 1.65E-18 |
| PDZD7    | -0.054492712 | 0.216998 | 0.281336 |
| PDZD8    | 0.157343079  | 0.000338 | 0.000781 |
| PDZD9    | -0.063269091 | 0.151643 | 0.205745 |
| PDZK1IP1 | -0.111578215 | 0.011281 | 0.01981  |
| PDZK1P1  | -0.222694241 | 3.30E-07 | 1.25E-06 |
| PDZK1    | -0.035273233 | 0.424418 | 0.499045 |
| PDZRN3   | -0.216768397 | 6.82E-07 | 2.46E-06 |
| PDZRN4   | -0.183094492 | 2.91E-05 | 8.08E-05 |
| PEA15    | -0.161835861 | 0.000226 | 0.000541 |
| PEAR1    | -0.215364448 | 8.08E-07 | 2.87E-06 |
| PEBP1    | -0.116845356 | 0.007947 | 0.014382 |
| PEBP4    | -0.355298456 | 9.08E-17 | 1.45E-15 |
| PECAM1   | -0.243070411 | 2.31E-08 | 1.05E-07 |
| PECI     | 0.050364128  | 0.253915 | 0.322423 |
| PECR     | -0.034673547 | 0.432341 | 0.507019 |
| PEF1     | -0.212886326 | 1.09E-06 | 3.78E-06 |
| PEG10    | -0.071480422 | 0.105172 | 0.148658 |

|         |              |          |          |
|---------|--------------|----------|----------|
| PEG3AS  | -0.065871635 | 0.135475 | 0.186339 |
| PEG3    | -0.215933265 | 7.54E-07 | 2.69E-06 |
| PELI1   | -0.126416399 | 0.004061 | 0.007744 |
| PELI2   | -0.163625513 | 0.000192 | 0.000466 |
| PELI3   | -0.143410906 | 0.001101 | 0.002324 |
| PELO    | 0.131966058  | 0.002694 | 0.00531  |
| PELP1   | 0.043581614  | 0.323599 | 0.396693 |
| PEMT    | 0.029559227  | 0.50329  | 0.575979 |
| PENK    | -0.352098772 | 1.78E-16 | 2.73E-15 |
| PEPD    | -0.09112187  | 0.038719 | 0.060628 |
| PER1    | -0.239648081 | 3.68E-08 | 1.61E-07 |
| PER2    | -0.173225866 | 7.77E-05 | 0.000201 |
| PER3    | -0.430907969 | 1.07E-24 | 5.62E-23 |
| PER4    | -0.036595441 | 0.40725  | 0.482006 |
| PERP    | 0.189667205  | 1.47E-05 | 4.30E-05 |
| PES1    | 0.190815866  | 1.30E-05 | 3.83E-05 |
| PET112L | 0.155759704  | 0.000388 | 0.000888 |
| PEX10   | -8.20E-05    | 0.99852  | 0.99912  |
| PEX11A  | -0.095730641 | 0.029842 | 0.047948 |
| PEX11B  | -0.134089663 | 0.002293 | 0.004576 |
| PEX11G  | -0.270020515 | 4.70E-10 | 2.74E-09 |
| PEX12   | -0.02777338  | 0.529435 | 0.601236 |
| PEX13   | 0.129609319  | 0.003213 | 0.006239 |
| PEX14   | -0.118888086 | 0.006913 | 0.012645 |
| PEX16   | -0.114328427 | 0.009411 | 0.01679  |
| PEX19   | -0.023121462 | 0.600623 | 0.665923 |
| PEX1    | 0.056419413  | 0.201155 | 0.263462 |
| PEX26   | 0.091021964  | 0.038934 | 0.060926 |
| PEX2    | 0.165527065  | 0.000161 | 0.000396 |
| PEX3    | -0.003677224 | 0.933655 | 0.948147 |
| PEX5L   | -0.141079442 | 0.001328 | 0.002762 |
| PEX5    | 0.180661272  | 3.73E-05 | 0.000102 |
| PEX6    | -0.037003391 | 0.402038 | 0.476684 |
| PEX7    | 0.007412596  | 0.866731 | 0.895633 |
| PF4V1   | -0.01339749  | 0.761652 | 0.808063 |
| PF4     | 0.116025675  | 0.0084   | 0.015122 |
| PFAS    | 0.04196962   | 0.341834 | 0.416031 |
| PFDN1   | 0.117540496  | 0.007581 | 0.013771 |
| PFDN2   | 0.33175744   | 1.07E-14 | 1.26E-13 |
| PFDN4   | 0.407151628  | 5.52E-22 | 1.94E-20 |
| PFDN5   | 0.112069957  | 0.010924 | 0.01924  |
| PFDN6   | 0.289336001  | 2.17E-11 | 1.54E-10 |
| PFKFB1  | -0.121105674 | 0.005927 | 0.010977 |
| PFKFB2  | -0.217823002 | 6.00E-07 | 2.19E-06 |

|         |              |          |          |
|---------|--------------|----------|----------|
| PFKFB3  | -0.143934051 | 0.001055 | 0.002233 |
| PFKFB4  | 0.158586144  | 0.000303 | 0.000706 |
| PFKL    | -0.236806225 | 5.37E-08 | 2.30E-07 |
| PFKM    | 0.069192881  | 0.116811 | 0.163308 |
| PFKP    | 0.362964606  | 1.76E-17 | 3.15E-16 |
| PFN1    | 0.248990554  | 1.02E-08 | 4.89E-08 |
| PFN2    | 0.410923761  | 2.12E-22 | 7.79E-21 |
| PFN3    | 0.021308277  | 0.629492 | 0.691653 |
| PFN4    | -0.031601528 | 0.474245 | 0.547937 |
| PGA3    | -0.155806978 | 0.000387 | 0.000884 |
| PGA4    | -0.074719463 | 0.090284 | 0.129827 |
| PGA5    | -0.120474126 | 0.006194 | 0.011429 |
| PGAM1   | 0.415523359  | 6.46E-23 | 2.62E-21 |
| PGAM2   | -0.088377957 | 0.044999 | 0.069526 |
| PGAM4   | 0.380748641  | 3.27E-19 | 7.65E-18 |
| PGAM5   | 0.502491163  | 2.66E-34 | 6.73E-32 |
| PGAP1   | -0.13490556  | 0.002154 | 0.004321 |
| PGAP2   | -0.013098805 | 0.76681  | 0.812328 |
| PGAP3   | -0.32591297  | 3.29E-14 | 3.60E-13 |
| PGBD1   | 0.037324697  | 0.397961 | 0.472663 |
| PGBD2   | -0.174986053 | 6.54E-05 | 0.000171 |
| PGBD3   | 0.022736041  | 0.60671  | 0.671442 |
| PGBD4   | -0.109195137 | 0.013159 | 0.022785 |
| PGBD5   | -0.161687905 | 0.000229 | 0.000548 |
| PGCP    | -0.29111519  | 1.62E-11 | 1.17E-10 |
| PGC     | -0.228907883 | 1.50E-07 | 6.02E-07 |
| PGD     | 0.27764419   | 1.44E-10 | 9.04E-10 |
| PGF     | 0.135678799  | 0.00203  | 0.004091 |
| PGGT1B  | 0.005079652  | 0.908448 | 0.92842  |
| PGK1    | 0.368394705  | 5.34E-18 | 1.04E-16 |
| PGK2    | 0.140302434  | 0.001413 | 0.002925 |
| PGLS    | -0.023661475 | 0.592142 | 0.658126 |
| PGLYRP1 | -0.09639222  | 0.028723 | 0.046303 |
| PGLYRP2 | -0.02325747  | 0.598482 | 0.663954 |
| PGLYRP3 | -0.061116835 | 0.166087 | 0.222967 |
| PGLYRP4 | -0.115814713 | 0.00852  | 0.015308 |
| PGM1    | 0.136832732  | 0.001856 | 0.003763 |
| PGM2L1  | 0.169420766  | 0.000112 | 0.000282 |
| PGM2    | 0.2196205    | 4.82E-07 | 1.79E-06 |
| PGM3    | 0.386619989  | 8.31E-20 | 2.10E-18 |
| PGM5P2  | -0.200984258 | 4.29E-06 | 1.36E-05 |
| PGM5    | -0.294906967 | 8.57E-12 | 6.49E-11 |
| PGPEP1L | -0.075436586 | 0.087228 | 0.12594  |
| PGPEP1  | -0.454912055 | 1.14E-27 | 9.08E-26 |

|         |              |          |          |
|---------|--------------|----------|----------|
| PGP     | 0.167157527  | 0.000138 | 0.000344 |
| PGRMC1  | -0.101362476 | 0.021413 | 0.035478 |
| PGRMC2  | 0.091881198  | 0.037118 | 0.058355 |
| PGR     | -0.320897579 | 8.46E-14 | 8.64E-13 |
| PGS1    | -0.33991957  | 2.14E-15 | 2.83E-14 |
| PHACTR1 | -0.400956793 | 2.60E-21 | 8.32E-20 |
| PHACTR2 | -0.186661792 | 2.01E-05 | 5.75E-05 |
| PHACTR3 | -0.15349361  | 0.000473 | 0.001064 |
| PHACTR4 | -0.180409635 | 3.82E-05 | 0.000104 |
| PHAX    | 0.107456073  | 0.014699 | 0.025213 |
| PHB2    | 0.360247727  | 3.16E-17 | 5.49E-16 |
| PHB     | 0.300663809  | 3.20E-12 | 2.57E-11 |
| PHC1    | -0.219408537 | 4.94E-07 | 1.83E-06 |
| PHC2    | -0.033942749 | 0.442111 | 0.516446 |
| PHC3    | -0.288627879 | 2.44E-11 | 1.72E-10 |
| PHEX    | 0.042426891  | 0.336596 | 0.410553 |
| PHF10   | -0.084646383 | 0.054894 | 0.083224 |
| PHF11   | -0.130418336 | 0.003025 | 0.005904 |
| PHF12   | -0.238312936 | 4.40E-08 | 1.91E-07 |
| PHF13   | -0.027761739 | 0.529608 | 0.601398 |
| PHF14   | 0.210651738  | 1.41E-06 | 4.84E-06 |
| PHF15   | -0.275522915 | 2.01E-10 | 1.23E-09 |
| PHF16   | 0.129491301  | 0.003241 | 0.00629  |
| PHF17   | 0.032187097  | 0.46609  | 0.539914 |
| PHF19   | 0.14598532   | 0.000892 | 0.001911 |
| PHF1    | -0.344892078 | 7.86E-16 | 1.10E-14 |
| PHF20L1 | 0.199910196  | 4.83E-06 | 1.52E-05 |
| PHF20   | -0.02099115  | 0.634602 | 0.696028 |
| PHF21A  | -0.24955992  | 9.43E-09 | 4.53E-08 |
| PHF21B  | -0.084991056 | 0.05391  | 0.081894 |
| PHF23   | 0.249612744  | 9.36E-09 | 4.50E-08 |
| PHF2    | -0.303482707 | 1.96E-12 | 1.64E-11 |
| PHF3    | -0.089954435 | 0.041294 | 0.064337 |
| PHF5A   | 0.279796496  | 1.02E-10 | 6.57E-10 |
| PHF6    | 0.191558901  | 1.20E-05 | 3.56E-05 |
| PHF7    | -0.270171547 | 4.59E-10 | 2.68E-09 |
| PHF8    | -0.004899662 | 0.911679 | 0.930914 |
| PHGDH   | 0.107870157  | 0.014319 | 0.024611 |
| PHGR1   | 0.109039284  | 0.013291 | 0.022979 |
| PHIP    | -0.193632111 | 9.62E-06 | 2.89E-05 |
| PHKA1   | 0.312881594  | 3.69E-13 | 3.45E-12 |
| PHKA2   | -0.255175668 | 4.25E-09 | 2.14E-08 |
| PHKB    | -0.233965943 | 7.81E-08 | 3.26E-07 |
| PHKG1   | -0.286850719 | 3.27E-11 | 2.26E-10 |



|          |              |          |          |
|----------|--------------|----------|----------|
| PHKG2    | -0.223615153 | 2.94E-07 | 1.12E-06 |
| PHLDA1   | 0.025895917  | 0.557646 | 0.627108 |
| PHLDA2   | 0.081095264  | 0.06593  | 0.098124 |
| PHLDA3   | -0.270582869 | 4.31E-10 | 2.53E-09 |
| PHLDB1   | -0.326875099 | 2.74E-14 | 3.03E-13 |
| PHLDB2   | 0.028326201  | 0.521269 | 0.593277 |
| PHLDB3   | -0.15575726  | 0.000388 | 0.000888 |
| PHLPP1   | 0.064506905  | 0.143779 | 0.19645  |
| PHLPP2   | -0.033012818 | 0.454724 | 0.528769 |
| PHOSPHO1 | -0.174260309 | 7.02E-05 | 0.000183 |
| PHOSPHO2 | -0.024585708 | 0.577755 | 0.645149 |
| PHOX2A   | 0.10148227   | 0.021259 | 0.035255 |
| PHOX2B   | 0.055932932  | 0.205074 | 0.267874 |
| PHPT1    | 0.040281827  | 0.361617 | 0.436287 |
| PHRF1    | -0.171455825 | 9.21E-05 | 0.000236 |
| PHTF1    | -0.073723896 | 0.094668 | 0.135382 |
| PHTF2    | 0.140964866  | 0.00134  | 0.002784 |
| PHYHD1   | -0.239513992 | 3.74E-08 | 1.64E-07 |
| PHYHIPL  | -0.018187024 | 0.680515 | 0.737723 |
| PHYHIP   | -0.118401793 | 0.007147 | 0.013041 |
| PHYH     | 0.040270858  | 0.361747 | 0.436341 |
| PI15     | 0.259054181  | 2.42E-09 | 1.26E-08 |
| PI16     | -0.368757958 | 4.93E-18 | 9.65E-17 |
| PI3      | 0.206710774  | 2.24E-06 | 7.40E-06 |
| PI4K2A   | -0.079231788 | 0.072413 | 0.106701 |
| PI4K2B   | 0.111380287  | 0.011427 | 0.020046 |
| PI4KAP1  | -0.240443006 | 3.30E-08 | 1.46E-07 |
| PI4KAP2  | -0.150641805 | 0.000604 | 0.001335 |
| PI4KA    | -0.273613303 | 2.70E-10 | 1.63E-09 |
| PI4KB    | -0.168771595 | 0.000119 | 0.000299 |
| PIAS1    | -0.10921982  | 0.013139 | 0.022755 |
| PIAS2    | 0.040276027  | 0.361686 | 0.436293 |
| PIAS3    | -0.079943097 | 0.069879 | 0.103337 |
| PIAS4    | -0.025314421 | 0.566529 | 0.635168 |
| PIBF1    | -0.089714251 | 0.041841 | 0.065098 |
| PICALM   | 0.136441664  | 0.001913 | 0.003869 |
| PICK1    | -0.112240952 | 0.010803 | 0.019047 |
| PID1     | -0.264096895 | 1.15E-09 | 6.33E-09 |
| PIF1     | 0.286025955  | 3.74E-11 | 2.56E-10 |
| PIGA     | -0.149809125 | 0.000648 | 0.001426 |
| PIGB     | -0.037319478 | 0.398027 | 0.472685 |
| PIGC     | 0.259401132  | 2.30E-09 | 1.20E-08 |
| PIGF     | 0.229886256  | 1.33E-07 | 5.36E-07 |
| PIGG     | -0.003754118 | 0.932271 | 0.947006 |

|         |              |          |          |
|---------|--------------|----------|----------|
| PIGH    | 0.095558443  | 0.030139 | 0.048391 |
| PIGK    | 0.094894796  | 0.031308 | 0.050043 |
| PIGL    | -0.132524076 | 0.002583 | 0.005104 |
| PIGM    | 0.017698355  | 0.688645 | 0.745162 |
| PIGN    | 0.116350049  | 0.008218 | 0.014826 |
| PIGO    | 0.104085105  | 0.01814  | 0.030501 |
| PIGP    | 0.004580095  | 0.917418 | 0.935196 |
| PIGQ    | -0.345232001 | 7.34E-16 | 1.03E-14 |
| PIGR    | -0.412857753 | 1.29E-22 | 4.94E-21 |
| PIGS    | -0.095119096 | 0.030909 | 0.04946  |
| PIGT    | 0.065696431  | 0.13652  | 0.187596 |
| PIGU    | 0.197186195  | 6.53E-06 | 2.01E-05 |
| PIGV    | -0.133131319 | 0.002467 | 0.004892 |
| PIGW    | 0.199681198  | 4.96E-06 | 1.55E-05 |
| PIGX    | 0.159105535  | 0.000289 | 0.000677 |
| PIGY    | 0.059534605  | 0.177347 | 0.236289 |
| PIGZ    | -0.124478593 | 0.004669 | 0.008821 |
| PIH1D1  | 0.09380061   | 0.033321 | 0.052909 |
| PIH1D2  | -0.16781509  | 0.00013  | 0.000325 |
| PIK3AP1 | -0.064095091 | 0.14636  | 0.199485 |
| PIK3C2A | -0.027801244 | 0.529022 | 0.601033 |
| PIK3C2B | -0.212331236 | 1.16E-06 | 4.02E-06 |
| PIK3C2G | 0.042233171  | 0.338809 | 0.412909 |
| PIK3C3  | 0.058820748  | 0.182609 | 0.242041 |
| PIK3CA  | 0.07994528   | 0.069872 | 0.103337 |
| PIK3CB  | 0.006898205  | 0.875902 | 0.903072 |
| PIK3CD  | -0.307043937 | 1.05E-12 | 9.17E-12 |
| PIK3CG  | -0.179929988 | 4.01E-05 | 0.000109 |
| PIK3IP1 | -0.475602379 | 2.00E-30 | 2.39E-28 |
| PIK3R1  | -0.380787987 | 3.24E-19 | 7.60E-18 |
| PIK3R2  | -0.048818902 | 0.268794 | 0.338463 |
| PIK3R3  | -0.207144853 | 2.13E-06 | 7.07E-06 |
| PIK3R4  | 0.039830791  | 0.367022 | 0.441661 |
| PIK3R5  | -0.302452239 | 2.35E-12 | 1.93E-11 |
| PIK3R6  | -0.333839729 | 7.14E-15 | 8.64E-14 |
| PIKFYVE | -0.202153734 | 3.76E-06 | 1.20E-05 |
| PILRA   | -0.162978891 | 0.000204 | 0.000492 |
| PILRB   | -0.271374678 | 3.82E-10 | 2.25E-09 |
| PIM1    | -0.038717651 | 0.380575 | 0.455178 |
| PIM2    | -0.050597276 | 0.251721 | 0.31986  |
| PIM3    | -0.01483472  | 0.736981 | 0.787111 |
| PIN1L   | 0.068032426  | 0.123089 | 0.171068 |
| PIN1    | -0.114009627 | 0.009613 | 0.01713  |
| PIN4    | 0.03167232   | 0.473255 | 0.546977 |

|          |              |          |          |
|----------|--------------|----------|----------|
| PINK1    | -0.278734526 | 1.21E-10 | 7.69E-10 |
| PINX1    | 0.190835795  | 1.30E-05 | 3.83E-05 |
| PION     | -0.371479519 | 2.69E-18 | 5.45E-17 |
| PIP4K2A  | -0.009434875 | 0.830862 | 0.865368 |
| PIP4K2B  | -0.246277173 | 1.49E-08 | 6.94E-08 |
| PIP4K2C  | 0.180302471  | 3.86E-05 | 0.000105 |
| PIP5K1A  | 0.155553773  | 0.000395 | 0.000902 |
| PIP5K1B  | -0.325433273 | 3.61E-14 | 3.92E-13 |
| PIP5K1C  | -0.235600062 | 6.30E-08 | 2.67E-07 |
| PIP5K1P1 | 0.053090238  | 0.229081 | 0.294878 |
| PIP5KL1  | -0.217875982 | 5.96E-07 | 2.17E-06 |
| PIPOX    | 0.004941942  | 0.91092  | 0.930376 |
| PIPSL    | 0.243096192  | 2.31E-08 | 1.04E-07 |
| PIP      | -0.176233333 | 5.79E-05 | 0.000153 |
| PIRT     | -0.038730619 | 0.380415 | 0.455096 |
| PIR      | 0.13497694   | 0.002143 | 0.004301 |
| PISD     | -0.130724671 | 0.002957 | 0.005783 |
| PITPNA   | -0.142605992 | 0.001175 | 0.002468 |
| PITPNB   | 0.274944887  | 2.19E-10 | 1.34E-09 |
| PITPNC1  | 0.352204169  | 1.74E-16 | 2.67E-15 |
| PITPNM1  | -0.020364747 | 0.644745 | 0.705257 |
| PITPNM2  | 0.005688399  | 0.897534 | 0.919913 |
| PITPNM3  | -0.3364875   | 4.24E-15 | 5.34E-14 |
| PITRM1   | 0.132698102  | 0.002549 | 0.005044 |
| PITX1    | 0.277224645  | 1.54E-10 | 9.61E-10 |
| PITX2    | 0.203596171  | 3.19E-06 | 1.03E-05 |
| PITX3    | 0.267151563  | 7.26E-10 | 4.13E-09 |
| PIWIL1   | 0.053252398  | 0.22766  | 0.293219 |
| PIWIL2   | 0.024382875  | 0.580898 | 0.647827 |
| PIWIL3   | 0.027041711  | 0.540343 | 0.611218 |
| PIWIL4   | -0.161614077 | 0.000231 | 0.000551 |
| PJA1     | -0.019639303 | 0.656575 | 0.715964 |
| PJA2     | -0.096409923 | 0.028694 | 0.046267 |
| PKD1L1   | -0.085246908 | 0.053189 | 0.080895 |
| PKD1L2   | 0.106606932  | 0.015507 | 0.026437 |
| PKD1L3   | -0.186294714 | 2.09E-05 | 5.96E-05 |
| PKD1     | -0.384317962 | 1.43E-19 | 3.55E-18 |
| PKD2L1   | -0.092921007 | 0.035018 | 0.055357 |
| PKD2L2   | -0.147917009 | 0.000759 | 0.001651 |
| PKD2     | -0.309707219 | 6.54E-13 | 5.90E-12 |
| PKDCC    | -0.075762335 | 0.085867 | 0.124155 |
| PKDREJ   | -0.195973529 | 7.46E-06 | 2.27E-05 |
| PKHD1L1  | -0.240147613 | 3.44E-08 | 1.52E-07 |
| PKHD1    | -0.179070218 | 4.37E-05 | 0.000118 |

|          |              |          |          |
|----------|--------------|----------|----------|
| PKIA     | -0.049650757 | 0.260712 | 0.32953  |
| PKIB     | 0.199238647  | 5.21E-06 | 1.63E-05 |
| PKIG     | 0.040860981  | 0.354749 | 0.429351 |
| PKLR     | -0.003999173 | 0.927862 | 0.943486 |
| PKM2     | 0.278370621  | 1.28E-10 | 8.12E-10 |
| PKMYT1   | 0.382257462  | 2.31E-19 | 5.55E-18 |
| PKN1     | -0.028326797 | 0.52126  | 0.593277 |
| PKN2     | 0.24398432   | 2.04E-08 | 9.32E-08 |
| PKN3     | -0.012427419 | 0.778443 | 0.821733 |
| PKNOX1   | -0.029103224 | 0.509901 | 0.582322 |
| PKNOX2   | -0.352295253 | 1.71E-16 | 2.63E-15 |
| PKP1     | 0.059449815  | 0.177966 | 0.236972 |
| PKP2     | 0.248118287  | 1.15E-08 | 5.46E-08 |
| PKP3     | 0.156842814  | 0.000353 | 0.000813 |
| PKP4     | -0.069416632 | 0.11563  | 0.161872 |
| PL-5283  | 0.33690519   | 3.91E-15 | 4.95E-14 |
| PLA1A    | -0.211486853 | 1.28E-06 | 4.42E-06 |
| PLA2G10  | -0.20840889  | 1.84E-06 | 6.19E-06 |
| PLA2G12A | -0.019452439 | 0.659637 | 0.718754 |
| PLA2G12B | -0.149291632 | 0.000677 | 0.001485 |
| PLA2G15  | -0.236394141 | 5.68E-08 | 2.42E-07 |
| PLA2G16  | -0.216433963 | 7.10E-07 | 2.55E-06 |
| PLA2G1B  | -0.311439207 | 4.79E-13 | 4.39E-12 |
| PLA2G2A  | -0.08657351  | 0.049579 | 0.075937 |
| PLA2G2C  | -0.072035664 | 0.10249  | 0.14532  |
| PLA2G2D  | -0.103994316 | 0.018242 | 0.030658 |
| PLA2G2F  | 0.029760618  | 0.500385 | 0.573327 |
| PLA2G3   | -0.236088805 | 5.91E-08 | 2.51E-07 |
| PLA2G4A  | 0.18088504   | 3.64E-05 | 9.95E-05 |
| PLA2G4C  | -0.272868812 | 3.03E-10 | 1.81E-09 |
| PLA2G4D  | -0.069770795 | 0.113779 | 0.159599 |
| PLA2G4E  | -0.154973395 | 0.000416 | 0.000946 |
| PLA2G4F  | -0.418508997 | 2.96E-23 | 1.27E-21 |
| PLA2G5   | -0.103687202 | 0.018589 | 0.031184 |
| PLA2G6   | -0.272879327 | 3.03E-10 | 1.81E-09 |
| PLA2G7   | -0.042502232 | 0.335738 | 0.409641 |
| PLA2R1   | -0.101126688 | 0.021719 | 0.035926 |
| PLAA     | 0.200444185  | 4.55E-06 | 1.44E-05 |
| PLAC1L   | 0.06319643   | 0.152115 | 0.206284 |
| PLAC1    | 0.228451459  | 1.59E-07 | 6.35E-07 |
| PLAC2    | -0.101880813 | 0.020753 | 0.034476 |
| PLAC4    | -0.001889026 | 0.965889 | 0.97388  |
| PLAC8L1  | -0.038833699 | 0.379148 | 0.453851 |
| PLAC8    | -0.189854449 | 1.44E-05 | 4.22E-05 |

|         |              |          |          |
|---------|--------------|----------|----------|
| PLAC9   | -0.322259642 | 6.56E-14 | 6.83E-13 |
| PLAG1   | -0.002841561 | 0.948708 | 0.959995 |
| PLAGL1  | -0.165358274 | 0.000164 | 0.000402 |
| PLAGL2  | -0.075369984 | 0.087508 | 0.126299 |
| PLAT    | -0.130529478 | 0.003    | 0.005858 |
| PLAUR   | 0.179907527  | 4.02E-05 | 0.000109 |
| PLAU    | 0.094591419  | 0.031856 | 0.050816 |
| PLB1    | -0.233047494 | 8.81E-08 | 3.66E-07 |
| PLBD1   | -0.024764944 | 0.574984 | 0.642665 |
| PLBD2   | 0.078962889  | 0.07339  | 0.107973 |
| PLCB1   | 0.17173176   | 8.97E-05 | 0.00023  |
| PLCB2   | -0.346212601 | 6.00E-16 | 8.58E-15 |
| PLCB3   | 0.009960332  | 0.821596 | 0.857773 |
| PLCB4   | -0.165217414 | 0.000166 | 0.000407 |
| PLCD1   | -0.389605914 | 4.09E-20 | 1.09E-18 |
| PLCD3   | 0.140514222  | 0.001389 | 0.00288  |
| PLCD4   | -0.186690673 | 2.01E-05 | 5.74E-05 |
| PLCE1   | -0.248854822 | 1.04E-08 | 4.97E-08 |
| PLCG1   | -0.250218831 | 8.59E-09 | 4.15E-08 |
| PLCG2   | -0.31559216  | 2.25E-13 | 2.18E-12 |
| PLCH1   | -0.234746673 | 7.05E-08 | 2.97E-07 |
| PLCH2   | -0.381273253 | 2.90E-19 | 6.87E-18 |
| PLCL1   | -0.304765171 | 1.57E-12 | 1.33E-11 |
| PLCL2   | -0.197757541 | 6.14E-06 | 1.90E-05 |
| PLCXD1  | -0.10413395  | 0.018086 | 0.030418 |
| PLCXD2  | 0.025336901  | 0.566184 | 0.634941 |
| PLCXD3  | -0.210484785 | 1.44E-06 | 4.93E-06 |
| PLCZ1   | -0.007816689 | 0.859539 | 0.889495 |
| PLD1    | 0.184270241  | 2.58E-05 | 7.23E-05 |
| PLD2    | -0.299196822 | 4.13E-12 | 3.26E-11 |
| PLD3    | -0.236399934 | 5.67E-08 | 2.42E-07 |
| PLD4    | -0.416775361 | 4.66E-23 | 1.92E-21 |
| PLD5    | -0.153621419 | 0.000468 | 0.001054 |
| PLD6    | -0.11768145  | 0.007508 | 0.013645 |
| PLDN    | 0.080455944  | 0.068098 | 0.101012 |
| PLEC    | 0.011622097  | 0.792462 | 0.833626 |
| PLEK2   | 0.31847584   | 1.33E-13 | 1.32E-12 |
| PLEKHA1 | 0.17589174   | 5.99E-05 | 0.000158 |
| PLEKHA2 | -0.216470909 | 7.07E-07 | 2.54E-06 |
| PLEKHA3 | 0.076386688  | 0.083308 | 0.120864 |
| PLEKHA4 | -0.288750336 | 2.39E-11 | 1.69E-10 |
| PLEKHA5 | 0.030114814  | 0.495297 | 0.568541 |
| PLEKHA6 | -0.059567561 | 0.177107 | 0.236001 |
| PLEKHA7 | -0.223811364 | 2.87E-07 | 1.10E-06 |

|          |              |          |          |
|----------|--------------|----------|----------|
| PLEKHA8  | 0.178064718  | 4.83E-05 | 0.000129 |
| PLEKHA9  | 0.169047751  | 0.000116 | 0.000292 |
| PLEKHB1  | -0.213626773 | 9.94E-07 | 3.49E-06 |
| PLEKHB2  | 0.14623823   | 0.000873 | 0.001875 |
| PLEKHF1  | -0.09478887  | 0.031498 | 0.050319 |
| PLEKHF2  | 0.080861329  | 0.066716 | 0.099176 |
| PLEKHG1  | -0.303472517 | 1.97E-12 | 1.64E-11 |
| PLEKHG2  | 0.177738423  | 4.99E-05 | 0.000133 |
| PLEKHG3  | -0.000767613 | 0.986135 | 0.989601 |
| PLEKHG4B | -0.159432883 | 0.000281 | 0.00066  |
| PLEKHG4  | -0.197743695 | 6.15E-06 | 1.90E-05 |
| PLEKHG5  | -0.077512564 | 0.078848 | 0.115155 |
| PLEKHG6  | 0.046802289  | 0.289093 | 0.360137 |
| PLEKHG7  | -0.252850335 | 5.92E-09 | 2.93E-08 |
| PLEKHH1  | 0.142616511  | 0.001174 | 0.002466 |
| PLEKHH2  | -0.460762589 | 1.98E-28 | 1.72E-26 |
| PLEKHH3  | -0.251038801 | 7.66E-09 | 3.73E-08 |
| PLEKHJ1  | 0.010894863  | 0.805179 | 0.84416  |
| PLEKHM1P | -0.484816534 | 1.02E-31 | 1.56E-29 |
| PLEKHM1  | -0.41482645  | 7.74E-23 | 3.08E-21 |
| PLEKHM2  | -0.279589627 | 1.06E-10 | 6.77E-10 |
| PLEKHM3  | -0.300366935 | 3.37E-12 | 2.70E-11 |
| PLEKHN1  | -0.101770024 | 0.020893 | 0.034696 |
| PLEKHO1  | -0.023423206 | 0.595877 | 0.661884 |
| PLEKHO2  | -0.160571367 | 0.000253 | 0.000601 |
| PLEK     | -0.156813216 | 0.000354 | 0.000815 |
| PLGLA    | 0.016626418  | 0.706603 | 0.761297 |
| PLGLB2   | -0.250093422 | 8.75E-09 | 4.22E-08 |
| PLG      | -0.030875156 | 0.484469 | 0.558163 |
| PLIN1    | -0.264144609 | 1.14E-09 | 6.28E-09 |
| PLIN2    | 0.201919561  | 3.86E-06 | 1.23E-05 |
| PLIN3    | 0.260883425  | 1.85E-09 | 9.84E-09 |
| PLIN4    | -0.202630142 | 3.56E-06 | 1.14E-05 |
| PLIN5    | -0.383039807 | 1.92E-19 | 4.66E-18 |
| PLK1S1   | -0.202230069 | 3.73E-06 | 1.19E-05 |
| PLK1     | 0.526595323  | 4.42E-38 | 2.32E-35 |
| PLK2     | -0.036108262 | 0.413527 | 0.488237 |
| PLK3     | -0.270433425 | 4.41E-10 | 2.58E-09 |
| PLK4     | 0.474742807  | 2.62E-30 | 3.08E-28 |
| PLK5P    | -0.034972155 | 0.428385 | 0.50294  |
| PLLP     | -0.377671305 | 6.63E-19 | 1.48E-17 |
| PLN      | 0.017250804  | 0.696122 | 0.75195  |
| PLOD1    | 0.17696245   | 5.39E-05 | 0.000143 |
| PLOD2    | 0.362008763  | 2.16E-17 | 3.82E-16 |

|         |              |          |          |
|---------|--------------|----------|----------|
| PLOD3   | 0.204166204  | 2.99E-06 | 9.71E-06 |
| PLP1    | -0.251594571 | 7.08E-09 | 3.46E-08 |
| PLP2    | 0.194349472  | 8.90E-06 | 2.68E-05 |
| PLRG1   | 0.181549797  | 3.41E-05 | 9.35E-05 |
| PLS1    | 0.076534701  | 0.08271  | 0.120119 |
| PLS3    | -0.059930366 | 0.174479 | 0.232902 |
| PLSCR1  | 0.102542205  | 0.019937 | 0.033225 |
| PLSCR2  | 0.058126232  | 0.187838 | 0.248215 |
| PLSCR3  | -0.071702187 | 0.104094 | 0.147291 |
| PLSCR4  | -0.291221038 | 1.59E-11 | 1.15E-10 |
| PLSCR5  | 0.07944689   | 0.071639 | 0.105716 |
| PLTP    | 0.079023492  | 0.073169 | 0.107664 |
| PLUNC   | 0.123763301  | 0.004914 | 0.009243 |
| PLVAP   | 0.027246565  | 0.537278 | 0.608103 |
| PLXDC1  | -0.308872746 | 7.59E-13 | 6.77E-12 |
| PLXDC2  | -0.191001873 | 1.28E-05 | 3.76E-05 |
| PLXNA1  | -0.075791494 | 0.085746 | 0.123998 |
| PLXNA2  | -0.346713426 | 5.42E-16 | 7.83E-15 |
| PLXNA3  | -0.110639048 | 0.011991 | 0.020913 |
| PLXNA4  | -0.080786392 | 0.06697  | 0.099509 |
| PLXNB1  | -0.349175337 | 3.26E-16 | 4.86E-15 |
| PLXNB2  | -0.355327824 | 9.02E-17 | 1.44E-15 |
| PLXNB3  | -0.150491896 | 0.000612 | 0.001351 |
| PLXNC1  | -0.187310031 | 1.88E-05 | 5.40E-05 |
| PLXND1  | -0.2927688   | 1.23E-11 | 9.06E-11 |
| PM20D1  | -0.264293299 | 1.12E-09 | 6.16E-09 |
| PM20D2  | 0.189575192  | 1.48E-05 | 4.34E-05 |
| PMAIP1  | 0.261786153  | 1.62E-09 | 8.69E-09 |
| PMCHL1  | 0.042180567  | 0.339412 | 0.413492 |
| PMCHL2  | -0.005533224 | 0.900314 | 0.922088 |
| PMCH    | 0.029139914  | 0.509367 | 0.581851 |
| PMEPA1  | 0.031169751  | 0.480308 | 0.554104 |
| PMF1    | -0.060216046 | 0.17243  | 0.23046  |
| PMFBP1  | -0.081632807 | 0.064151 | 0.095715 |
| PML     | -0.14167747  | 0.001266 | 0.002644 |
| PMM1    | -0.227151587 | 1.88E-07 | 7.42E-07 |
| PMM2    | 0.176541487  | 5.62E-05 | 0.000148 |
| PMP22   | -0.110690378 | 0.011951 | 0.020852 |
| PMP2    | -0.148047851 | 0.000751 | 0.001636 |
| PMPCA   | 0.093332779  | 0.034214 | 0.054203 |
| PMPCB   | 0.145442789  | 0.000932 | 0.001992 |
| PMS1    | 0.111250019  | 0.011525 | 0.020193 |
| PMS2CL  | -0.046475925 | 0.292473 | 0.363735 |
| PMS2L11 | -0.274281923 | 2.43E-10 | 1.48E-09 |

|          |              |          |          |
|----------|--------------|----------|----------|
| PMS2L1   | 0.234174687  | 7.60E-08 | 3.18E-07 |
| PMS2L2   | -0.146897915 | 0.000827 | 0.001784 |
| PMS2L3   | -0.153075087 | 0.00049  | 0.001101 |
| PMS2L4   | -0.103963669 | 0.018276 | 0.030711 |
| PMS2L5   | 0.109056563  | 0.013277 | 0.022956 |
| PMS2     | 0.020062707  | 0.64966  | 0.709585 |
| PMVK     | -0.150743203 | 0.000599 | 0.001324 |
| PNCK     | 0.050834526  | 0.249502 | 0.317435 |
| PNKD     | -0.096533321 | 0.028489 | 0.045963 |
| PNKP     | -0.064377896 | 0.144584 | 0.197414 |
| PNLDC1   | -0.122194112 | 0.005491 | 0.010244 |
| PNLIPRP1 | -0.057380557 | 0.193574 | 0.254667 |
| PNLIPRP2 | -0.006344459 | 0.885792 | 0.910388 |
| PNLIPRP3 | 0.032546012  | 0.46113  | 0.535005 |
| PNLIP    | -0.004696929 | 0.915319 | 0.933724 |
| PNMA1    | 0.330005312  | 1.50E-14 | 1.73E-13 |
| PNMA2    | -0.333146095 | 8.18E-15 | 9.77E-14 |
| PNMA3    | -0.199102349 | 5.29E-06 | 1.65E-05 |
| PNMA5    | -0.072306613 | 0.101201 | 0.143819 |
| PNMA6A   | -0.147630564 | 0.000778 | 0.001687 |
| PNMAL1   | -0.218537016 | 5.50E-07 | 2.02E-06 |
| PNMAL2   | -0.402703096 | 1.69E-21 | 5.58E-20 |
| PNMT     | -0.236910152 | 5.30E-08 | 2.27E-07 |
| PNN      | -0.01318401  | 0.765338 | 0.811112 |
| PNO1     | 0.467381935  | 2.62E-29 | 2.58E-27 |
| PNOC     | -0.051840358 | 0.240244 | 0.307269 |
| PNPLA1   | 0.162206803  | 0.000218 | 0.000525 |
| PNPLA2   | -0.286475933 | 3.48E-11 | 2.39E-10 |
| PNPLA3   | -0.001471093 | 0.973433 | 0.980151 |
| PNPLA4   | -0.097599235 | 0.026775 | 0.043471 |
| PNPLA5   | 0.116490417  | 0.008141 | 0.014703 |
| PNPLA6   | -0.213228523 | 1.04E-06 | 3.65E-06 |
| PNPLA7   | -0.371892411 | 2.45E-18 | 5.01E-17 |
| PNPLA8   | 0.15955535   | 0.000278 | 0.000653 |
| PNPO     | 0.112579324  | 0.010565 | 0.018664 |
| PNPT1    | 0.357475319  | 5.72E-17 | 9.50E-16 |
| PNP      | 0.425091191  | 5.15E-24 | 2.48E-22 |
| PNRC1    | -0.119951365 | 0.006423 | 0.011821 |
| PNRC2    | -0.185886171 | 2.18E-05 | 6.20E-05 |
| POC1A    | 0.460908609  | 1.89E-28 | 1.66E-26 |
| POC1B    | 0.378425217  | 5.58E-19 | 1.26E-17 |
| POC5     | -0.07433344  | 0.091964 | 0.131892 |
| PODNL1   | -0.065301821 | 0.138896 | 0.190533 |
| PODN     | -0.343566347 | 1.03E-15 | 1.42E-14 |



|         |              |          |          |
|---------|--------------|----------|----------|
| PODXL2  | -0.070571756 | 0.10968  | 0.154387 |
| PODXL   | -0.115676331 | 0.0086   | 0.015437 |
| POF1B   | -0.004799658 | 0.913474 | 0.932366 |
| POFUT1  | 0.271158788  | 3.94E-10 | 2.32E-09 |
| POFUT2  | -0.184744045 | 2.46E-05 | 6.91E-05 |
| POGK    | 0.005366728  | 0.903299 | 0.92434  |
| POGZ    | -0.136899898 | 0.001846 | 0.003744 |
| POLA1   | 0.077994351  | 0.077    | 0.112769 |
| POLA2   | 0.32026038   | 9.53E-14 | 9.67E-13 |
| POLB    | 0.114424901  | 0.009351 | 0.016688 |
| POLD1   | 0.036375139  | 0.410082 | 0.484754 |
| POLD2   | 0.279496332  | 1.07E-10 | 6.86E-10 |
| POLD3   | 0.183538288  | 2.78E-05 | 7.75E-05 |
| POLD4   | 0.093306603  | 0.034265 | 0.054266 |
| POLDIP2 | 0.222331691  | 3.45E-07 | 1.30E-06 |
| POLDIP3 | -0.194483133 | 8.78E-06 | 2.65E-05 |
| POLE2   | 0.576475742  | 6.10E-47 | 1.52E-43 |
| POLE3   | 0.297728451  | 5.31E-12 | 4.13E-11 |
| POLE4   | 0.19570493   | 7.68E-06 | 2.34E-05 |
| POLE    | 0.126741127  | 0.003966 | 0.00758  |
| POLG2   | -0.006989131 | 0.874279 | 0.901847 |
| POLG    | -0.147716648 | 0.000772 | 0.001676 |
| POLH    | -0.304821974 | 1.55E-12 | 1.32E-11 |
| POLI    | -0.216096211 | 7.39E-07 | 2.65E-06 |
| POLK    | -0.167666985 | 0.000132 | 0.000329 |
| POLL    | -0.121267365 | 0.005861 | 0.010865 |
| POLM    | -0.180103136 | 3.94E-05 | 0.000107 |
| POLN    | -0.196947642 | 6.71E-06 | 2.06E-05 |
| POLQ    | 0.360391246  | 3.06E-17 | 5.32E-16 |
| POLR1A  | 0.158387092  | 0.000308 | 0.000718 |
| POLR1B  | 0.305169439  | 1.46E-12 | 1.25E-11 |
| POLR1C  | 0.243841301  | 2.08E-08 | 9.50E-08 |
| POLR1D  | 0.131325394  | 0.002827 | 0.005546 |
| POLR1E  | 0.171730117  | 8.97E-05 | 0.00023  |
| POLR2A  | -0.080202527 | 0.068974 | 0.102167 |
| POLR2B  | 0.213625027  | 9.94E-07 | 3.49E-06 |
| POLR2C  | -0.028203075 | 0.523082 | 0.595069 |
| POLR2D  | 0.286415854  | 3.51E-11 | 2.42E-10 |
| POLR2E  | -0.069779129 | 0.113736 | 0.159567 |
| POLR2F  | 0.181763904  | 3.33E-05 | 9.16E-05 |
| POLR2G  | 0.246461838  | 1.45E-08 | 6.78E-08 |
| POLR2H  | 0.250131355  | 8.70E-09 | 4.20E-08 |
| POLR2I  | 0.072259452  | 0.101425 | 0.144034 |
| POLR2J2 | -0.046953897 | 0.287532 | 0.358505 |

|            |              |          |          |
|------------|--------------|----------|----------|
| POLR2J3    | -0.122547241 | 0.005356 | 0.010011 |
| POLR2J4    | -0.181615086 | 3.38E-05 | 9.29E-05 |
| POLR2J     | 0.195552229  | 7.81E-06 | 2.38E-05 |
| POLR2K     | 0.338418734  | 2.89E-15 | 3.75E-14 |
| POLR2L     | -0.052993988 | 0.229927 | 0.295877 |
| POLR3A     | 0.232683595  | 9.24E-08 | 3.83E-07 |
| POLR3B     | 0.128172087  | 0.003572 | 0.006876 |
| POLR3C     | 0.162020125  | 0.000222 | 0.000533 |
| POLR3D     | 0.222087815  | 3.55E-07 | 1.34E-06 |
| POLR3E     | 0.033014187  | 0.454705 | 0.528769 |
| POLR3F     | 0.181088153  | 3.57E-05 | 9.77E-05 |
| POLR3GL    | -0.32326554  | 5.43E-14 | 5.71E-13 |
| POLR3G     | 0.4331823    | 5.70E-25 | 3.18E-23 |
| POLR3H     | -0.139213979 | 0.00154  | 0.003167 |
| POLR3K     | 0.179328981  | 4.26E-05 | 0.000115 |
| POLRMT     | -0.046707487 | 0.290072 | 0.361221 |
| POM121C    | -0.021292832 | 0.629741 | 0.691836 |
| POM121L10P | -0.27040666  | 4.43E-10 | 2.59E-09 |
| POM121L1P  | -0.295613426 | 7.60E-12 | 5.81E-11 |
| POM121L2   | -0.065933498 | 0.135108 | 0.185936 |
| POM121L4P  | -0.205985931 | 2.43E-06 | 8.01E-06 |
| POM121L8P  | -0.300118992 | 3.52E-12 | 2.81E-11 |
| POM121L9P  | -0.348930461 | 3.43E-16 | 5.09E-15 |
| POM121     | -0.073064613 | 0.097664 | 0.139287 |
| POMC       | -0.011394908 | 0.796429 | 0.836962 |
| POMGNT1    | -0.112047678 | 0.01094  | 0.019263 |
| POMP       | 0.332429853  | 9.40E-15 | 1.11E-13 |
| POMT1      | -0.271422037 | 3.79E-10 | 2.24E-09 |
| POMT2      | 0.058956611  | 0.181598 | 0.240958 |
| POMZP3     | -0.080805122 | 0.066907 | 0.099422 |
| PON1       | -0.194416706 | 8.84E-06 | 2.67E-05 |
| PON2       | 0.02268355   | 0.607541 | 0.672064 |
| PON3       | -0.118480628 | 0.007109 | 0.012975 |
| POP1       | 0.39076218   | 3.11E-20 | 8.39E-19 |
| POP4       | 0.147603127  | 0.00078  | 0.001691 |
| POP5       | 0.167515476  | 0.000134 | 0.000333 |
| POP7       | 0.375524325  | 1.08E-18 | 2.34E-17 |
| POPDC2     | -0.302865804 | 2.19E-12 | 1.81E-11 |
| POPDC3     | 0.298985436  | 4.28E-12 | 3.36E-11 |
| PORCN      | -0.012588399 | 0.775649 | 0.81952  |
| POR        | -0.058563489 | 0.184533 | 0.2443   |
| POSTN      | 0.224856559  | 2.51E-07 | 9.72E-07 |
| POT1       | 0.154531819  | 0.000432 | 0.000981 |
| POTEA      | 0.000854458  | 0.984567 | 0.988375 |

|             |              |          |          |
|-------------|--------------|----------|----------|
| POTEB       | -0.047168497 | 0.285332 | 0.356251 |
| POTEC       | -0.012838252 | 0.771319 | 0.816023 |
| POTED       | 0.055302941  | 0.21023  | 0.273733 |
| POTEE       | 0.139226817  | 0.001539 | 0.003164 |
| POTEF       | 0.144255351  | 0.001027 | 0.002182 |
| POTEG       | 0.066244203  | 0.133274 | 0.183627 |
| POTEH       | 0.067947981  | 0.123556 | 0.171574 |
| POU1F1      | -0.02876828  | 0.514785 | 0.587168 |
| POU2AF1     | -0.084666664 | 0.054836 | 0.083149 |
| POU2F1      | 0.037587573  | 0.394644 | 0.469504 |
| POU2F2      | -0.088995807 | 0.043515 | 0.067403 |
| POU2F3      | -0.318581223 | 1.30E-13 | 1.30E-12 |
| POU3F1      | -0.279775177 | 1.03E-10 | 6.59E-10 |
| POU3F2      | -0.024933058 | 0.572391 | 0.640519 |
| POU3F3      | -0.026901463 | 0.542446 | 0.613189 |
| POU3F4      | 0.035473598  | 0.421789 | 0.496392 |
| POU4F1      | 0.078154336  | 0.076394 | 0.112004 |
| POU4F2      | -0.03080784  | 0.485422 | 0.559003 |
| POU4F3      | -0.004703435 | 0.915202 | 0.933701 |
| POU5F1B     | -0.197330603 | 6.43E-06 | 1.98E-05 |
| POU5F1      | -0.241281867 | 2.95E-08 | 1.31E-07 |
| POU5F2      | -0.154267867 | 0.000442 | 0.001002 |
| POU6F1      | -0.373778836 | 1.60E-18 | 3.37E-17 |
| POU6F2      | 0.103019335  | 0.019365 | 0.032361 |
| PP14571     | 0.03101264   | 0.482525 | 0.55628  |
| PPA1        | 0.213638331  | 9.93E-07 | 3.49E-06 |
| PPA2        | 0.162518555  | 0.000212 | 0.000512 |
| PPAN-P2RY11 | -0.125660306 | 0.004289 | 0.008147 |
| PPAN        | 0.139761597  | 0.001475 | 0.003044 |
| PPAP2A      | -0.044758951 | 0.310687 | 0.382767 |
| PPAP2B      | -0.222019932 | 3.58E-07 | 1.35E-06 |
| PPAP2C      | 0.059410852  | 0.178251 | 0.237256 |
| PPAPDC1A    | 0.265992625  | 8.65E-10 | 4.86E-09 |
| PPAPDC1B    | 0.01691578   | 0.701738 | 0.75724  |
| PPAPDC2     | 0.044657082  | 0.31179  | 0.383764 |
| PPAPDC3     | -0.118698379 | 0.007003 | 0.012798 |
| PPARA       | -0.211752156 | 1.24E-06 | 4.29E-06 |
| PPARD       | -0.044658355 | 0.311776 | 0.383764 |
| PPARGC1A    | 0.021243956  | 0.630527 | 0.692357 |
| PPARGC1B    | -0.181945106 | 3.27E-05 | 9.00E-05 |
| PPARG       | 0.01417642   | 0.748249 | 0.796719 |
| PPAT        | 0.460746649  | 1.99E-28 | 1.72E-26 |
| PPBPL2      | 0.010961574  | 0.80401  | 0.843196 |
| PPBP        | -0.007313623 | 0.868494 | 0.897223 |

|         |              |          |          |
|---------|--------------|----------|----------|
| PPCDC   | 0.026356817  | 0.550653 | 0.620852 |
| PPCS    | 0.093763336  | 0.033391 | 0.053    |
| PPDPF   | -0.146388283 | 0.000862 | 0.001854 |
| PPEF1   | 0.250769894  | 7.95E-09 | 3.86E-08 |
| PPEF2   | -0.129777889 | 0.003173 | 0.00617  |
| PPFIA1  | 0.085228642  | 0.053241 | 0.080957 |
| PPFIA2  | -0.171311757 | 9.34E-05 | 0.000239 |
| PPFIA3  | 0.0459531    | 0.297942 | 0.36925  |
| PPFIA4  | -0.107249977 | 0.014892 | 0.025521 |
| PPFIBP1 | 0.091185003  | 0.038584 | 0.060443 |
| PPFIBP2 | -0.454959047 | 1.12E-27 | 8.99E-26 |
| PPHLN1  | 0.286787617  | 3.31E-11 | 2.28E-10 |
| PPIAL4C | 0.373320637  | 1.78E-18 | 3.69E-17 |
| PPIAL4D | 0.062775464  | 0.154868 | 0.209567 |
| PPIAL4E | 0.042774967  | 0.332643 | 0.406361 |
| PPIAL4G | 0.312956519  | 3.64E-13 | 3.41E-12 |
| PPIA    | 0.343199917  | 1.11E-15 | 1.52E-14 |
| PPIB    | 0.217804987  | 6.01E-07 | 2.19E-06 |
| PPIC    | 0.047480049  | 0.282159 | 0.35284  |
| PPID    | 0.408477636  | 3.95E-22 | 1.42E-20 |
| PPIEL   | -0.3279824   | 2.22E-14 | 2.48E-13 |
| PPIE    | -0.029201017 | 0.508479 | 0.58097  |
| PPIF    | 0.411390059  | 1.88E-22 | 6.99E-21 |
| PPIG    | 0.054853564  | 0.213965 | 0.277926 |
| PPIH    | 0.219680472  | 4.78E-07 | 1.77E-06 |
| PPIL1   | 0.494573198  | 4.00E-33 | 7.68E-31 |
| PPIL2   | -0.159495893 | 0.000279 | 0.000656 |
| PPIL3   | 0.092013897  | 0.036844 | 0.057947 |
| PPIL4   | 0.013653353  | 0.757241 | 0.804182 |
| PPIL5   | 0.559414652  | 9.67E-44 | 1.38E-40 |
| PPIL6   | -0.308256351 | 8.47E-13 | 7.49E-12 |
| PPIP5K1 | -0.207671265 | 2.00E-06 | 6.69E-06 |
| PPIP5K2 | 0.029279867  | 0.507335 | 0.579927 |
| PPL     | -0.311601822 | 4.65E-13 | 4.28E-12 |
| PPM1A   | 0.106375253  | 0.015734 | 0.026797 |
| PPM1B   | -0.016403852 | 0.710352 | 0.76443  |
| PPM1D   | -0.057858477 | 0.189883 | 0.25047  |
| PPM1E   | 0.006842949  | 0.876888 | 0.903838 |
| PPM1F   | -0.157304038 | 0.000339 | 0.000783 |
| PPM1G   | 0.363015326  | 1.74E-17 | 3.12E-16 |
| PPM1H   | -0.007721196 | 0.861238 | 0.890877 |
| PPM1J   | -0.150437956 | 0.000614 | 0.001356 |
| PPM1K   | -0.128764447 | 0.00342  | 0.006609 |
| PPM1L   | -0.098924283 | 0.024768 | 0.040469 |

|          |              |          |          |
|----------|--------------|----------|----------|
| PPM1M    | -0.409220339 | 3.27E-22 | 1.18E-20 |
| PPM1N    | -0.032113176 | 0.467115 | 0.540913 |
| PPME1    | 0.257069105  | 3.23E-09 | 1.65E-08 |
| PPOX     | -0.239776069 | 3.61E-08 | 1.59E-07 |
| PPP1CA   | 0.235646181  | 6.27E-08 | 2.65E-07 |
| PPP1CB   | 0.225828789  | 2.23E-07 | 8.66E-07 |
| PPP1CC   | 0.449273945  | 5.97E-27 | 4.32E-25 |
| PPP1R10  | -0.157046161 | 0.000347 | 0.0008   |
| PPP1R11  | 0.177933905  | 4.89E-05 | 0.000131 |
| PPP1R12A | 0.233584372  | 8.21E-08 | 3.43E-07 |
| PPP1R12B | -0.398174287 | 5.16E-21 | 1.57E-19 |
| PPP1R12C | -0.325639423 | 3.47E-14 | 3.78E-13 |
| PPP1R13B | -0.288960694 | 2.31E-11 | 1.64E-10 |
| PPP1R13L | -0.146052685 | 0.000887 | 0.001902 |
| PPP1R14A | -0.127642001 | 0.003714 | 0.007127 |
| PPP1R14B | 0.353353447  | 1.37E-16 | 2.12E-15 |
| PPP1R14C | -0.270386966 | 4.44E-10 | 2.60E-09 |
| PPP1R14D | 0.148352198  | 0.000732 | 0.001597 |
| PPP1R15A | -0.253097514 | 5.72E-09 | 2.83E-08 |
| PPP1R15B | 0.210898474  | 1.37E-06 | 4.71E-06 |
| PPP1R16A | 0.004691915  | 0.915409 | 0.933769 |
| PPP1R16B | -0.218962729 | 5.22E-07 | 1.92E-06 |
| PPP1R1A  | -0.030487238 | 0.489977 | 0.563275 |
| PPP1R1B  | -0.318930978 | 1.22E-13 | 1.22E-12 |
| PPP1R1C  | 0.012846747  | 0.771172 | 0.815981 |
| PPP1R2P1 | 0.048818371  | 0.268799 | 0.338463 |
| PPP1R2P3 | 0.153322884  | 0.00048  | 0.00108  |
| PPP1R2P9 | -0.027801818 | 0.529014 | 0.601033 |
| PPP1R2   | 0.141307004  | 0.001304 | 0.002717 |
| PPP1R3A  | -0.036320213 | 0.410789 | 0.485447 |
| PPP1R3B  | 0.081055082  | 0.066064 | 0.098295 |
| PPP1R3C  | -0.123569166 | 0.004982 | 0.009364 |
| PPP1R3D  | -0.115601267 | 0.008643 | 0.015509 |
| PPP1R3E  | -0.323557024 | 5.14E-14 | 5.44E-13 |
| PPP1R3F  | -0.100367286 | 0.022732 | 0.037436 |
| PPP1R3G  | 0.15741312   | 0.000336 | 0.000776 |
| PPP1R7   | -0.124708362 | 0.004593 | 0.008684 |
| PPP1R8   | 0.229825996  | 1.34E-07 | 5.40E-07 |
| PPP1R9A  | -0.219573435 | 4.85E-07 | 1.80E-06 |
| PPP1R9B  | -0.23972028  | 3.64E-08 | 1.60E-07 |
| PPP2CA   | 0.284837094  | 4.54E-11 | 3.07E-10 |
| PPP2CB   | -0.106990426 | 0.015137 | 0.025882 |
| PPP2R1A  | 0.107935205  | 0.01426  | 0.024525 |
| PPP2R1B  | 0.316740244  | 1.83E-13 | 1.78E-12 |

|          |              |          |          |
|----------|--------------|----------|----------|
| PPP2R2A  | 0.078282759  | 0.07591  | 0.111393 |
| PPP2R2B  | -0.241085899 | 3.03E-08 | 1.35E-07 |
| PPP2R2C  | 0.190947373  | 1.28E-05 | 3.78E-05 |
| PPP2R2D  | 0.137137236  | 0.001813 | 0.003681 |
| PPP2R3A  | -0.094586621 | 0.031864 | 0.050826 |
| PPP2R3B  | -0.035585301 | 0.420328 | 0.494964 |
| PPP2R3C  | 0.234766807  | 7.03E-08 | 2.96E-07 |
| PPP2R4   | 0.003108696  | 0.943894 | 0.955462 |
| PPP2R5A  | -0.235977485 | 6.00E-08 | 2.55E-07 |
| PPP2R5B  | -0.195946194 | 7.48E-06 | 2.28E-05 |
| PPP2R5C  | 0.04013043   | 0.363425 | 0.437995 |
| PPP2R5D  | 0.133163219  | 0.002461 | 0.004881 |
| PPP2R5E  | 0.306028011  | 1.26E-12 | 1.08E-11 |
| PPP3CA   | -0.081920224 | 0.063216 | 0.094485 |
| PPP3CB   | 0.089505834  | 0.042321 | 0.065737 |
| PPP3CC   | -0.140884091 | 0.001349 | 0.002801 |
| PPP3R1   | 0.28322023   | 5.90E-11 | 3.92E-10 |
| PPP3R2   | -0.140234609 | 0.00142  | 0.00294  |
| PPP4C    | 0.23690328   | 5.31E-08 | 2.27E-07 |
| PPP4R1L  | -0.13123919  | 0.002845 | 0.005578 |
| PPP4R1   | 0.026486861  | 0.548688 | 0.618985 |
| PPP4R2   | 0.294080386  | 9.85E-12 | 7.38E-11 |
| PPP4R4   | -0.191781299 | 1.17E-05 | 3.48E-05 |
| PPP5C    | 0.055849167  | 0.205754 | 0.268675 |
| PPP6C    | 0.01452898   | 0.742208 | 0.791424 |
| PPPDE1   | 0.05735774   | 0.193751 | 0.254833 |
| PPPDE2   | 0.221690795  | 3.73E-07 | 1.40E-06 |
| PPRC1    | 0.081531225  | 0.064484 | 0.096146 |
| PPT1     | -0.104453323 | 0.017733 | 0.02987  |
| PPT2     | 0.151690108  | 0.000552 | 0.001229 |
| PPTC7    | 0.202599862  | 3.57E-06 | 1.15E-05 |
| PPWD1    | -0.234895962 | 6.92E-08 | 2.92E-07 |
| PPY2     | 0.120174486  | 0.006324 | 0.01165  |
| PPYR1    | -0.161950189 | 0.000224 | 0.000536 |
| PPY      | 0.034781789  | 0.430905 | 0.505557 |
| PQBP1    | 0.090084375  | 0.041    | 0.063909 |
| PQLC1    | -0.158861836 | 0.000295 | 0.000691 |
| PQLC2    | -0.059729521 | 0.17593  | 0.234589 |
| PQLC3    | -0.041137996 | 0.351494 | 0.42603  |
| PRAC     | 0.022730867  | 0.606792 | 0.671461 |
| PRAF2    | -0.083491601 | 0.058301 | 0.087789 |
| PRAM1    | -0.372019411 | 2.38E-18 | 4.87E-17 |
| PRAMEF10 | 0.065263301  | 0.13913  | 0.190802 |
| PRAMEF11 | 0.05882478   | 0.182579 | 0.242017 |

|          |              |          |          |
|----------|--------------|----------|----------|
| PRAMEF12 | 0.048489411  | 0.272042 | 0.34205  |
| PRAMEF13 | -0.046335054 | 0.29394  | 0.365264 |
| PRAMEF14 | -0.071880366 | 0.103235 | 0.146227 |
| PRAMEF16 | -0.060653671 | 0.169326 | 0.226812 |
| PRAMEF18 | -0.058661194 | 0.1838   | 0.243443 |
| PRAMEF1  | 0.050624629  | 0.251464 | 0.319554 |
| PRAMEF20 | 0.034310386  | 0.43718  | 0.511554 |
| PRAMEF22 | -0.026181558 | 0.553307 | 0.62307  |
| PRAMEF2  | 0.026603576  | 0.546927 | 0.617347 |
| PRAMEF4  | 0.049993626  | 0.25743  | 0.326125 |
| PRAMEF5  | 0.0406842    | 0.356837 | 0.431381 |
| PRAMEF6  | 0.049870391  | 0.258606 | 0.32736  |
| PRAMEF8  | 0.008265752  | 0.851561 | 0.882649 |
| PRAMEF9  | 0.022254906  | 0.614346 | 0.678128 |
| PRAME    | 0.246070817  | 1.53E-08 | 7.13E-08 |
| PRAP1    | 0.21041255   | 1.45E-06 | 4.96E-06 |
| PRB1     | -0.114995199 | 0.009002 | 0.016105 |
| PRB2     | -0.136402474 | 0.001919 | 0.003879 |
| PRB3     | -0.04515544  | 0.306416 | 0.378165 |
| PRB4     | -0.109791354 | 0.012665 | 0.021984 |
| PRC1     | 0.493029721  | 6.73E-33 | 1.23E-30 |
| PRCC     | 0.187852544  | 1.78E-05 | 5.13E-05 |
| PRCD     | -0.373791944 | 1.60E-18 | 3.37E-17 |
| PRCP     | 0.069103153  | 0.117287 | 0.163867 |
| PRDM10   | 0.013354323  | 0.762397 | 0.80881  |
| PRDM11   | -0.169823392 | 0.000108 | 0.000273 |
| PRDM12   | 0.159551885  | 0.000278 | 0.000653 |
| PRDM13   | 0.087708864  | 0.046654 | 0.07182  |
| PRDM14   | 0.019773301  | 0.654383 | 0.714042 |
| PRDM15   | -0.162059426 | 0.000221 | 0.000532 |
| PRDM16   | -0.420930432 | 1.56E-23 | 6.93E-22 |
| PRDM1    | 0.000750174  | 0.98645  | 0.989867 |
| PRDM2    | -0.400434249 | 2.96E-21 | 9.38E-20 |
| PRDM4    | 0.241652157  | 2.81E-08 | 1.25E-07 |
| PRDM5    | -0.184529708 | 2.51E-05 | 7.05E-05 |
| PRDM6    | -0.367032946 | 7.22E-18 | 1.38E-16 |
| PRDM7    | 0.050981307  | 0.248136 | 0.315987 |
| PRDM8    | -0.071191266 | 0.106591 | 0.150461 |
| PRDM9    | 0.190615165  | 1.33E-05 | 3.91E-05 |
| PRDX1    | 0.23343733   | 8.37E-08 | 3.49E-07 |
| PRDX2    | 0.112064809  | 0.010928 | 0.019245 |
| PRDX3    | 0.381137807  | 2.99E-19 | 7.05E-18 |
| PRDX4    | 0.331897658  | 1.04E-14 | 1.22E-13 |
| PRDX5    | -0.069666976 | 0.114319 | 0.160256 |

|          |              |          |          |
|----------|--------------|----------|----------|
| PRDX6    | 0.250719637  | 8.01E-09 | 3.88E-08 |
| PRDXDD1P | -0.166413103 | 0.000148 | 0.000367 |
| PREB     | 0.312225072  | 4.16E-13 | 3.85E-12 |
| PRELID1  | 0.221849061  | 3.66E-07 | 1.38E-06 |
| PRELID2  | -0.090811052 | 0.039391 | 0.061564 |
| PRELP    | -0.28270534  | 6.41E-11 | 4.24E-10 |
| PREPL    | -0.197421923 | 6.37E-06 | 1.96E-05 |
| PREP     | 0.022026192  | 0.617991 | 0.681361 |
| PREX1    | -0.256216276 | 3.65E-09 | 1.85E-08 |
| PREX2    | -0.357554451 | 5.62E-17 | 9.35E-16 |
| PRF1     | -0.066307143 | 0.132904 | 0.183194 |
| PRG1     | 0.05683923   | 0.197818 | 0.259532 |
| PRG2     | -0.15196324  | 0.00054  | 0.001202 |
| PRG3     | 0.001415966  | 0.974428 | 0.980807 |
| PRG4     | -0.387849433 | 6.21E-20 | 1.60E-18 |
| PRH1     | 0.00957891   | 0.82832  | 0.863365 |
| PRH2     | -0.171018375 | 9.60E-05 | 0.000245 |
| PRHOXNB  | 0.012350255  | 0.779783 | 0.82284  |
| PRIC285  | -0.184566734 | 2.50E-05 | 7.03E-05 |
| PRICKLE1 | -0.263227188 | 1.31E-09 | 7.12E-09 |
| PRICKLE2 | -0.333769513 | 7.24E-15 | 8.75E-14 |
| PRICKLE3 | 0.073396005  | 0.096149 | 0.137314 |
| PRICKLE4 | -0.482828578 | 1.96E-31 | 2.80E-29 |
| PRIM1    | 0.382713294  | 2.07E-19 | 5.01E-18 |
| PRIM2    | 0.198797981  | 5.47E-06 | 1.71E-05 |
| PRIMA1   | -0.184748667 | 2.46E-05 | 6.90E-05 |
| PRINS    | -0.118907551 | 0.006903 | 0.012629 |
| PRKAA1   | 0.036668403  | 0.406315 | 0.481099 |
| PRKAA2   | 0.165010381  | 0.000169 | 0.000414 |
| PRKAB1   | -0.071207152 | 0.106512 | 0.150361 |
| PRKAB2   | 0.137996811  | 0.001695 | 0.003462 |
| PRKACA   | -0.227387002 | 1.83E-07 | 7.21E-07 |
| PRKACB   | 0.057041399  | 0.196225 | 0.257697 |
| PRKACG   | 0.000725135  | 0.986903 | 0.990272 |
| PRKAG1   | 0.286504389  | 3.46E-11 | 2.39E-10 |
| PRKAG2   | -0.015758425 | 0.721265 | 0.773633 |
| PRKAG3   | -0.113370181 | 0.010029 | 0.017804 |
| PRKAR1A  | -0.171640477 | 9.05E-05 | 0.000232 |
| PRKAR1B  | 0.084006322  | 0.056761 | 0.085736 |
| PRKAR2A  | 0.040865122  | 0.3547   | 0.429318 |
| PRKAR2B  | -0.154082601 | 0.00045  | 0.001017 |
| PRKCA    | -0.11248863  | 0.010628 | 0.01876  |
| PRKCB    | -0.295518497 | 7.73E-12 | 5.89E-11 |
| PRKCDBP  | -0.038202417 | 0.386951 | 0.461781 |



|         |              |          |          |
|---------|--------------|----------|----------|
| PRKCD   | -0.305889075 | 1.29E-12 | 1.11E-11 |
| PRKCE   | -0.38372633  | 1.64E-19 | 4.02E-18 |
| PRKCG   | 0.043592532  | 0.323477 | 0.396593 |
| PRKCH   | -0.217220403 | 6.45E-07 | 2.34E-06 |
| PRKCI   | 0.014386254  | 0.744652 | 0.793522 |
| PRKCQ   | -0.215964339 | 7.51E-07 | 2.69E-06 |
| PRKCSH  | -0.024461059 | 0.579686 | 0.646835 |
| PRKCZ   | -0.244113227 | 2.01E-08 | 9.18E-08 |
| PRKD1   | -0.162195282 | 0.000219 | 0.000526 |
| PRKD2   | -0.217538506 | 6.21E-07 | 2.26E-06 |
| PRKD3   | 0.049150621  | 0.265551 | 0.3349   |
| PRKDC   | 0.284843228  | 4.54E-11 | 3.07E-10 |
| PRKG1   | -0.115048713 | 0.00897  | 0.016052 |
| PRKG2   | 0.038994405  | 0.377177 | 0.451925 |
| PRKRA   | 0.216526634  | 7.02E-07 | 2.52E-06 |
| PRKRIP1 | -0.057247817 | 0.194608 | 0.255792 |
| PRKRIR  | 0.239549725  | 3.73E-08 | 1.63E-07 |
| PRKX    | -0.031187155 | 0.480063 | 0.553917 |
| PRKY    | 0.110063919  | 0.012445 | 0.021638 |
| PRLHR   | 0.057099505  | 0.195769 | 0.257216 |
| PRLH    | 0.006399913  | 0.884801 | 0.909743 |
| PRLR    | -0.087983735 | 0.045968 | 0.07088  |
| PRL     | 0.052987338  | 0.229986 | 0.295929 |
| PRM1    | -0.067647164 | 0.12523  | 0.173525 |
| PRM2    | -0.062495461 | 0.156721 | 0.21183  |
| PRM3    | 0.106640347  | 0.015474 | 0.026391 |
| PRMT10  | -0.123355983 | 0.005058 | 0.009496 |
| PRMT1   | 0.310347911  | 5.83E-13 | 5.29E-12 |
| PRMT2   | -0.37426724  | 1.44E-18 | 3.05E-17 |
| PRMT3   | 0.391574674  | 2.56E-20 | 7.02E-19 |
| PRMT5   | 0.42373194   | 7.42E-24 | 3.46E-22 |
| PRMT6   | 0.005336391  | 0.903843 | 0.924706 |
| PRMT7   | -0.186224658 | 2.11E-05 | 6.00E-05 |
| PRMT8   | -0.301286701 | 2.88E-12 | 2.33E-11 |
| PRND    | -0.136746057 | 0.001869 | 0.003785 |
| PRNP    | -0.098001736 | 0.026151 | 0.042538 |
| PRO0611 | -0.16160061  | 0.000231 | 0.000552 |
| PRO0628 | -0.143176979 | 0.001122 | 0.002365 |
| PRO1768 | -0.050205331 | 0.255417 | 0.323919 |
| PROCA1  | -0.248519046 | 1.09E-08 | 5.19E-08 |
| PROCR   | 0.039884792  | 0.366372 | 0.441121 |
| PROC    | -0.012886683 | 0.77048  | 0.815381 |
| PRODH2  | 0.100929625  | 0.021978 | 0.036324 |
| PRODH   | -0.315871166 | 2.14E-13 | 2.07E-12 |

|         |              |          |          |
|---------|--------------|----------|----------|
| PROK1   | -0.156650479 | 0.000359 | 0.000826 |
| PROK2   | 0.017636239  | 0.689681 | 0.746041 |
| PROKR1  | -0.094621902 | 0.0318   | 0.05074  |
| PROKR2  | -0.011244936 | 0.79905  | 0.839188 |
| PROL1   | 0.069507438  | 0.115153 | 0.161306 |
| PROM1   | -0.155415132 | 0.0004   | 0.000912 |
| PROM2   | -0.162372102 | 0.000215 | 0.000518 |
| PROP1   | -0.105220899 | 0.016909 | 0.028599 |
| PROS1   | -0.173069521 | 7.89E-05 | 0.000204 |
| PROSC   | -0.014931351 | 0.735332 | 0.785727 |
| PROX1   | 0.006513338  | 0.882774 | 0.908053 |
| PROX2   | -0.058872825 | 0.182221 | 0.24164  |
| PROZ    | 0.017253847  | 0.696071 | 0.751936 |
| PRPF18  | 0.027857246  | 0.528192 | 0.600336 |
| PRPF19  | 0.280989955  | 8.45E-11 | 5.51E-10 |
| PRPF31  | -0.061851005 | 0.161048 | 0.216931 |
| PRPF38A | 0.006855927  | 0.876656 | 0.903693 |
| PRPF38B | -0.21543978  | 8.00E-07 | 2.85E-06 |
| PRPF39  | 0.000545793  | 0.990142 | 0.992724 |
| PRPF3   | -0.069828276 | 0.113481 | 0.159255 |
| PRPF40A | 0.32897719   | 1.83E-14 | 2.08E-13 |
| PRPF40B | -0.024219159 | 0.583441 | 0.6503   |
| PRPF4B  | -0.065706429 | 0.13646  | 0.187537 |
| PRPF4   | 0.412524324  | 1.40E-22 | 5.33E-21 |
| PRPF6   | -0.097818843 | 0.026433 | 0.042947 |
| PRPF8   | -0.104849667 | 0.017303 | 0.029186 |
| PRPH2   | 0.024861213  | 0.573498 | 0.641435 |
| PRPH    | -0.106880793 | 0.015242 | 0.026037 |
| PRPS1L1 | 0.029154022  | 0.509162 | 0.581684 |
| PRPS1   | 0.184141662  | 2.61E-05 | 7.32E-05 |
| PRPS2   | 0.209289583  | 1.66E-06 | 5.61E-06 |
| PRPSAP1 | 0.11307468   | 0.010226 | 0.018121 |
| PRPSAP2 | 0.149145443  | 0.000685 | 0.001503 |
| PRR11   | 0.43677283   | 2.11E-25 | 1.24E-23 |
| PRR12   | -0.208491099 | 1.82E-06 | 6.13E-06 |
| PRR13   | 0.174426921  | 6.91E-05 | 0.00018  |
| PRR14   | -0.134773454 | 0.002176 | 0.004362 |
| PRR15L  | -0.29985886  | 3.68E-12 | 2.93E-11 |
| PRR15   | 0.004742195  | 0.914506 | 0.933229 |
| PRR16   | 0.163789385  | 0.000189 | 0.000459 |
| PRR18   | -0.089364178 | 0.04265  | 0.066202 |
| PRR19   | 0.266099395  | 8.51E-10 | 4.78E-09 |
| PRR22   | -0.166961865 | 0.000141 | 0.00035  |
| PRR23A  | -0.030193228 | 0.494175 | 0.567513 |

|              |              |          |          |
|--------------|--------------|----------|----------|
| PRR23C       | -0.033899378 | 0.442695 | 0.516917 |
| PRR24        | -0.237817942 | 4.70E-08 | 2.03E-07 |
| PRR25        | -0.122093555 | 0.00553  | 0.010311 |
| PRR3         | -0.013052325 | 0.767614 | 0.813136 |
| PRR4         | -0.041352907 | 0.348981 | 0.423472 |
| PRR5-ARHGAP8 | -0.201782465 | 3.92E-06 | 1.25E-05 |
| PRR5L        | -0.087491783 | 0.047202 | 0.07258  |
| PRR5         | -0.093369749 | 0.034143 | 0.054094 |
| PRR7         | 0.210586588  | 1.42E-06 | 4.87E-06 |
| PRRC1        | 0.09520331   | 0.03076  | 0.049249 |
| PRRG1        | -0.012364149 | 0.779542 | 0.822643 |
| PRRG2        | -0.192729568 | 1.06E-05 | 3.16E-05 |
| PRRG3        | -0.149686702 | 0.000655 | 0.00144  |
| PRRG4        | -0.030084776 | 0.495728 | 0.568904 |
| PRRT1        | -0.089183804 | 0.043071 | 0.066794 |
| PRRT2        | -0.385131871 | 1.18E-19 | 2.94E-18 |
| PRRT3        | -0.333951266 | 6.99E-15 | 8.47E-14 |
| PRRT4        | -0.106309512 | 0.015799 | 0.026889 |
| PRRX1        | 0.054496118  | 0.21697  | 0.281317 |
| PRRX2        | 0.002077529  | 0.962488 | 0.971136 |
| PRSS12       | -0.326388085 | 3.01E-14 | 3.31E-13 |
| PRSS16       | -0.146620219 | 0.000846 | 0.001823 |
| PRSS1        | 0.056672996  | 0.199134 | 0.260969 |
| PRSS21       | -0.022415517 | 0.611792 | 0.675944 |
| PRSS22       | -0.098769851 | 0.024995 | 0.0408   |
| PRSS23       | 0.205990993  | 2.43E-06 | 8.00E-06 |
| PRSS27       | -0.13838523  | 0.001644 | 0.003362 |
| PRSS30P      | -0.079160541 | 0.072671 | 0.10701  |
| PRSS33       | -0.100916892 | 0.021995 | 0.036346 |
| PRSS35       | -0.160622313 | 0.000252 | 0.000598 |
| PRSS36       | -0.153237827 | 0.000484 | 0.001087 |
| PRSS37       | -0.118140547 | 0.007276 | 0.013264 |
| PRSS38       | 0.018072272  | 0.682421 | 0.739388 |
| PRSS3        | 0.216113502  | 7.38E-07 | 2.64E-06 |
| PRSS41       | 0.029664054  | 0.501777 | 0.574682 |
| PRSS42       | 0.073552549  | 0.09544  | 0.136387 |
| PRSS45       | -0.202612495 | 3.57E-06 | 1.14E-05 |
| PRSS48       | -0.020064301 | 0.649634 | 0.709585 |
| PRSS50       | -0.139007572 | 0.001565 | 0.003213 |
| PRSS53       | -0.043544951 | 0.324006 | 0.397071 |
| PRSS54       | -0.067765647 | 0.124569 | 0.172728 |
| PRSS55       | -0.014554159 | 0.741777 | 0.791049 |
| PRSS8        | -0.245893931 | 1.57E-08 | 7.29E-08 |
| PRSSL1       | -0.123057819 | 0.005166 | 0.009683 |

|          |              |          |          |
|----------|--------------|----------|----------|
| PRTFDC1  | 0.313150964  | 3.52E-13 | 3.30E-12 |
| PRTG     | -0.179350411 | 4.25E-05 | 0.000115 |
| PRTN3    | -0.038375949 | 0.384796 | 0.459429 |
| PRUNE2   | -0.093483917 | 0.033924 | 0.053776 |
| PRUNE    | 0.09787609   | 0.026344 | 0.042817 |
| PRX      | -0.408182355 | 4.26E-22 | 1.52E-20 |
| PRY2     | -0.035833457 | 0.417093 | 0.49185  |
| PSAPL1   | -0.059122434 | 0.180371 | 0.239616 |
| PSAP     | -0.109174678 | 0.013177 | 0.022805 |
| PSAT1    | 0.371854468  | 2.47E-18 | 5.04E-17 |
| PSCA     | 0.010735351  | 0.807975 | 0.84647  |
| PSD2     | -0.09622517  | 0.029002 | 0.046697 |
| PSD3     | -0.069469058 | 0.115354 | 0.161554 |
| PSD4     | -0.324369552 | 4.41E-14 | 4.72E-13 |
| PSD      | -0.182447928 | 3.11E-05 | 8.59E-05 |
| PSEN1    | 0.200464295  | 4.54E-06 | 1.43E-05 |
| PSEN2    | -0.080206808 | 0.068959 | 0.102153 |
| PSENEEN  | 0.156427502  | 0.000366 | 0.000841 |
| PSG10    | 0.044220002  | 0.316555 | 0.388917 |
| PSG11    | 0.055495354  | 0.208645 | 0.271971 |
| PSG1     | 0.142746832  | 0.001161 | 0.002442 |
| PSG2     | 0.086295505  | 0.050318 | 0.076991 |
| PSG3     | 0.218729045  | 5.37E-07 | 1.97E-06 |
| PSG4     | 0.084019208  | 0.056723 | 0.085698 |
| PSG5     | 0.094525781  | 0.031975 | 0.050978 |
| PSG6     | 0.196025958  | 7.42E-06 | 2.26E-05 |
| PSG7     | 0.084386746  | 0.055646 | 0.084216 |
| PSG8     | 0.129029984  | 0.003354 | 0.006494 |
| PSG9     | 0.07364016   | 0.095045 | 0.135861 |
| PSIMCT-1 | 0.165908057  | 0.000155 | 0.000383 |
| PSIP1    | -0.016191182 | 0.713942 | 0.767422 |
| PSKH1    | -0.14707071  | 0.000815 | 0.001761 |
| PSKH2    | 0.036065651  | 0.414079 | 0.488728 |
| PSMA1    | 0.335335975  | 5.32E-15 | 6.58E-14 |
| PSMA2    | 0.362337961  | 2.01E-17 | 3.57E-16 |
| PSMA3    | 0.434785481  | 3.66E-25 | 2.09E-23 |
| PSMA4    | 0.348377917  | 3.85E-16 | 5.66E-15 |
| PSMA5    | 0.37706209   | 7.62E-19 | 1.69E-17 |
| PSMA6    | 0.35405283   | 1.18E-16 | 1.85E-15 |
| PSMA7    | 0.319357534  | 1.13E-13 | 1.14E-12 |
| PSMA8    | -0.049460816 | 0.262542 | 0.331545 |
| PSMB10   | -0.104497382 | 0.017685 | 0.029794 |
| PSMB11   | 0.009585814  | 0.828198 | 0.863313 |
| PSMB1    | 0.188372554  | 1.68E-05 | 4.88E-05 |

|          |              |          |          |
|----------|--------------|----------|----------|
| PSMB2    | 0.238882143  | 4.08E-08 | 1.78E-07 |
| PSMB3    | 0.259715672  | 2.20E-09 | 1.15E-08 |
| PSMB4    | 0.260564102  | 1.94E-09 | 1.03E-08 |
| PSMB5    | 0.475346286  | 2.17E-30 | 2.58E-28 |
| PSMB6    | 0.274949905  | 2.19E-10 | 1.34E-09 |
| PSMB7    | 0.32870118   | 1.93E-14 | 2.19E-13 |
| PSMB8    | 0.070403282  | 0.110533 | 0.155422 |
| PSMB9    | 0.060464983  | 0.170659 | 0.228331 |
| PSMC1    | 0.253271987  | 5.58E-09 | 2.77E-08 |
| PSMC2    | 0.304974572  | 1.51E-12 | 1.29E-11 |
| PSMC3IP  | 0.298493851  | 4.65E-12 | 3.64E-11 |
| PSMC3    | 0.178347741  | 4.70E-05 | 0.000126 |
| PSMC4    | 0.310172002  | 6.01E-13 | 5.45E-12 |
| PSMC5    | 0.096833376  | 0.027997 | 0.045246 |
| PSMC6    | 0.530774868  | 9.09E-39 | 5.51E-36 |
| PSMD10   | 0.197633519  | 6.22E-06 | 1.92E-05 |
| PSMD11   | 0.386400532  | 8.75E-20 | 2.20E-18 |
| PSMD12   | 0.425906206  | 4.14E-24 | 2.02E-22 |
| PSMD13   | 0.264888738  | 1.02E-09 | 5.67E-09 |
| PSMD14   | 0.487108011  | 4.83E-32 | 7.69E-30 |
| PSMD1    | 0.328291743  | 2.09E-14 | 2.35E-13 |
| PSMD2    | 0.28410517   | 5.12E-11 | 3.43E-10 |
| PSMD3    | 0.241503471  | 2.86E-08 | 1.28E-07 |
| PSMD4    | 0.236750169  | 5.41E-08 | 2.31E-07 |
| PSMD5    | 0.15908576   | 0.000289 | 0.000678 |
| PSMD6    | 0.259853535  | 2.15E-09 | 1.13E-08 |
| PSMD7    | 0.389381863  | 4.32E-20 | 1.14E-18 |
| PSMD8    | 0.232660289  | 9.27E-08 | 3.84E-07 |
| PSMD9    | 0.33765933   | 3.36E-15 | 4.31E-14 |
| PSME1    | 0.151470235  | 0.000563 | 0.001251 |
| PSME2    | 0.227865168  | 1.72E-07 | 6.81E-07 |
| PSME3    | 0.368894021  | 4.78E-18 | 9.38E-17 |
| PSME4    | 0.248527854  | 1.09E-08 | 5.18E-08 |
| PSMF1    | -0.032797599 | 0.457671 | 0.53164  |
| PSMG1    | 0.277180061  | 1.55E-10 | 9.67E-10 |
| PSMG2    | 0.126734297  | 0.003968 | 0.007583 |
| PSMG3    | 0.246984653  | 1.35E-08 | 6.33E-08 |
| PSMG4    | 0.09056421   | 0.039931 | 0.06237  |
| PSORS1C1 | -0.129717565 | 0.003187 | 0.006194 |
| PSORS1C2 | -0.156650668 | 0.000359 | 0.000826 |
| PSORS1C3 | -0.240515068 | 3.27E-08 | 1.45E-07 |
| PSPC1    | 0.150207103  | 0.000626 | 0.001381 |
| PSPH     | 0.287179785  | 3.10E-11 | 2.15E-10 |
| PSPN     | -0.021705903 | 0.623111 | 0.685993 |

|         |              |          |          |
|---------|--------------|----------|----------|
| PSRC1   | 0.356847006  | 6.54E-17 | 1.08E-15 |
| PSTK    | 0.147231352  | 0.000804 | 0.001739 |
| PSTPIP1 | -0.261850589 | 1.60E-09 | 8.61E-09 |
| PSTPIP2 | -0.122748331 | 0.005281 | 0.009878 |
| PTAFR   | -0.0768832   | 0.081316 | 0.118302 |
| PTAR1   | -0.214683769 | 8.76E-07 | 3.11E-06 |
| PTBP1   | 0.2347163    | 7.08E-08 | 2.98E-07 |
| PTBP2   | 0.013168181  | 0.765611 | 0.811318 |
| PTCD1   | 0.19420684   | 9.04E-06 | 2.72E-05 |
| PTCD2   | 0.126014628  | 0.004181 | 0.007955 |
| PTCD3   | 0.23462716   | 7.17E-08 | 3.01E-07 |
| PTCH1   | -0.408454491 | 3.97E-22 | 1.42E-20 |
| PTCH2   | -0.358911318 | 4.21E-17 | 7.14E-16 |
| PTCHD1  | -0.238741419 | 4.15E-08 | 1.81E-07 |
| PTCHD2  | -0.188667607 | 1.63E-05 | 4.73E-05 |
| PTCHD3  | 0.005328491  | 0.903984 | 0.924758 |
| PTCRA   | -0.263622775 | 1.23E-09 | 6.74E-09 |
| PTDSS1  | 0.36733101   | 6.76E-18 | 1.30E-16 |
| PTDSS2  | 0.107180107  | 0.014957 | 0.025623 |
| PTENP1  | 0.036438991  | 0.40926  | 0.483955 |
| PTEN    | -0.07409909  | 0.092996 | 0.133153 |
| PTER    | 0.182176929  | 3.20E-05 | 8.80E-05 |
| PTF1A   | 0.010065267  | 0.819749 | 0.856247 |
| PTGDR   | -0.160347367 | 0.000259 | 0.000612 |
| PTGDS   | -0.392061531 | 2.28E-20 | 6.27E-19 |
| PTGER1  | -0.135086361 | 0.002125 | 0.004268 |
| PTGER2  | -0.06797567  | 0.123403 | 0.171444 |
| PTGER3  | -0.129535092 | 0.003231 | 0.006272 |
| PTGER4  | -0.304168046 | 1.74E-12 | 1.47E-11 |
| PTGES2  | 0.196522726  | 7.03E-06 | 2.15E-05 |
| PTGES3  | 0.455654872  | 9.14E-28 | 7.34E-26 |
| PTGES   | 0.14693789   | 0.000824 | 0.001779 |
| PTGFRN  | 0.003326361  | 0.939973 | 0.952699 |
| PTGFR   | -0.243984238 | 2.04E-08 | 9.32E-08 |
| PTGIR   | -0.321479388 | 7.59E-14 | 7.83E-13 |
| PTGIS   | -0.093661962 | 0.033584 | 0.053292 |
| PTGR1   | 0.235781435  | 6.15E-08 | 2.61E-07 |
| PTGR2   | 0.074481215  | 0.091318 | 0.131163 |
| PTGS1   | -0.201409338 | 4.09E-06 | 1.30E-05 |
| PTGS2   | 0.056134895  | 0.20344  | 0.266054 |
| PTH1R   | -0.350766325 | 2.35E-16 | 3.53E-15 |
| PTH2R   | 0.047841267  | 0.27851  | 0.349029 |
| PTH2    | 0.080771432  | 0.067021 | 0.099577 |
| PTHLH   | 0.237468071  | 4.92E-08 | 2.12E-07 |

|         |              |          |          |
|---------|--------------|----------|----------|
| PTH     | 0.009193119  | 0.835133 | 0.86882  |
| PTK2B   | -0.432153999 | 7.57E-25 | 4.11E-23 |
| PTK2    | 0.08952789   | 0.04227  | 0.065668 |
| PTK6    | -0.020489918 | 0.642713 | 0.703458 |
| PTK7    | -0.32522096  | 3.75E-14 | 4.07E-13 |
| PTMA    | 0.236155868  | 5.86E-08 | 2.49E-07 |
| PTMS    | 0.058586191  | 0.184363 | 0.244123 |
| PTN     | -0.212960302 | 1.08E-06 | 3.75E-06 |
| PTOV1   | 0.030454979  | 0.490437 | 0.563739 |
| PTP4A1  | 0.252002203  | 6.68E-09 | 3.27E-08 |
| PTP4A2  | 0.193789234  | 9.46E-06 | 2.84E-05 |
| PTP4A3  | -0.053992173 | 0.221257 | 0.286052 |
| PTPDC1  | 0.03708061   | 0.401056 | 0.475636 |
| PTPLAD1 | 0.188695366  | 1.63E-05 | 4.72E-05 |
| PTPLAD2 | -0.251127276 | 7.56E-09 | 3.69E-08 |
| PTPLA   | 0.102607576  | 0.019858 | 0.033117 |
| PTPLB   | 0.169325768  | 0.000113 | 0.000285 |
| PTPMT1  | 0.037189243  | 0.399677 | 0.474334 |
| PTPN11  | 0.256869044  | 3.33E-09 | 1.69E-08 |
| PTPN12  | 0.15980173   | 0.000271 | 0.00064  |
| PTPN13  | -0.404491387 | 1.08E-21 | 3.66E-20 |
| PTPN14  | 0.000719725  | 0.987    | 0.99032  |
| PTPN18  | -0.411683255 | 1.74E-22 | 6.53E-21 |
| PTPN1   | -0.112147406 | 0.010869 | 0.019154 |
| PTPN20A | 0.02062954   | 0.640449 | 0.701518 |
| PTPN20B | 0.036124796  | 0.413313 | 0.488026 |
| PTPN21  | -0.300030369 | 3.57E-12 | 2.85E-11 |
| PTPN22  | -0.173226384 | 7.77E-05 | 0.000201 |
| PTPN23  | -0.169388421 | 0.000112 | 0.000283 |
| PTPN2   | 0.0760401    | 0.084721 | 0.122692 |
| PTPN3   | -0.260004083 | 2.11E-09 | 1.11E-08 |
| PTPN4   | -0.097048808 | 0.027649 | 0.044737 |
| PTPN5   | -0.114488394 | 0.009312 | 0.016624 |
| PTPN6   | -0.262129847 | 1.54E-09 | 8.31E-09 |
| PTPN7   | -0.124359195 | 0.004709 | 0.008892 |
| PTPN9   | -0.001151231 | 0.979208 | 0.984676 |
| PTPRA   | -0.187477519 | 1.85E-05 | 5.32E-05 |
| PTPRB   | -0.223663213 | 2.92E-07 | 1.12E-06 |
| PTPRCAP | -0.151575982 | 0.000558 | 0.00124  |
| PTPRC   | -0.193935085 | 9.31E-06 | 2.80E-05 |
| PTPRD   | -0.244736487 | 1.84E-08 | 8.47E-08 |
| PTPRE   | -0.255394661 | 4.11E-09 | 2.07E-08 |
| PTPRF   | -0.121505815 | 0.005763 | 0.0107   |
| PTPRG   | -0.136904294 | 0.001846 | 0.003743 |

|         |              |          |          |
|---------|--------------|----------|----------|
| PTPRH   | 0.176451629  | 5.67E-05 | 0.00015  |
| PTPRJ   | -0.258885281 | 2.48E-09 | 1.29E-08 |
| PTPRK   | -0.110146943 | 0.012378 | 0.021528 |
| PTPRM   | -0.19311215  | 1.02E-05 | 3.04E-05 |
| PTPRN2  | -0.124914188 | 0.004526 | 0.00856  |
| PTPRN   | 0.263989495  | 1.17E-09 | 6.42E-09 |
| PTPRO   | -0.201014172 | 4.27E-06 | 1.36E-05 |
| PTPRQ   | -0.223555958 | 2.96E-07 | 1.13E-06 |
| PTPRR   | 0.00839981   | 0.849182 | 0.880823 |
| PTPRS   | -0.259950642 | 2.12E-09 | 1.12E-08 |
| PTPRT   | -0.281851017 | 7.36E-11 | 4.83E-10 |
| PTPRU   | -0.297348268 | 5.66E-12 | 4.39E-11 |
| PTPRVP  | -0.177530514 | 5.09E-05 | 0.000136 |
| PTPRZ1  | -0.205672201 | 2.52E-06 | 8.28E-06 |
| PTRF    | -0.176651797 | 5.56E-05 | 0.000147 |
| PTRH1   | -0.109836355 | 0.012629 | 0.021925 |
| PTRH2   | 0.327979553  | 2.22E-14 | 2.48E-13 |
| PTS     | 0.330330147  | 1.41E-14 | 1.63E-13 |
| PTTG1IP | -0.080824882 | 0.06684  | 0.099344 |
| PTTG1   | 0.349742078  | 2.90E-16 | 4.33E-15 |
| PTTG2   | 0.158526305  | 0.000304 | 0.00071  |
| PTTG3P  | 0.261922578  | 1.59E-09 | 8.53E-09 |
| PTX3    | -0.002184795 | 0.960552 | 0.96982  |
| PTX4    | -0.124546258 | 0.004647 | 0.008781 |
| PUF60   | 0.332176439  | 9.88E-15 | 1.16E-13 |
| PUM1    | -0.073261642 | 0.096761 | 0.138107 |
| PUM2    | -0.112937145 | 0.01032  | 0.018271 |
| PURA    | -0.153051986 | 0.000491 | 0.001103 |
| PURB    | 0.038491319  | 0.383368 | 0.458025 |
| PURG    | -0.116519346 | 0.008125 | 0.014675 |
| PUS10   | -0.311047645 | 5.14E-13 | 4.70E-12 |
| PUS1    | 0.301923135  | 2.58E-12 | 2.10E-11 |
| PUS3    | 0.230773745  | 1.18E-07 | 4.82E-07 |
| PUS7L   | 0.368231174  | 5.54E-18 | 1.08E-16 |
| PUS7    | 0.376542737  | 8.58E-19 | 1.88E-17 |
| PUSL1   | 0.120890233  | 0.006017 | 0.011133 |
| PVALB   | -0.237350037 | 5.00E-08 | 2.15E-07 |
| PVRIG   | -0.260335131 | 2.01E-09 | 1.06E-08 |
| PVRL1   | -0.009774901 | 0.824863 | 0.86051  |
| PVRL2   | 0.132152409  | 0.002657 | 0.005241 |
| PVRL3   | -0.23097311  | 1.15E-07 | 4.70E-07 |
| PVRL4   | -0.189949008 | 1.43E-05 | 4.18E-05 |
| PVR     | 0.30347557   | 1.97E-12 | 1.64E-11 |
| PVT1    | 0.114802792  | 0.009118 | 0.016301 |



|           |              |          |          |
|-----------|--------------|----------|----------|
| PWP1      | 0.465542014  | 4.61E-29 | 4.39E-27 |
| PWP2      | -0.05208022  | 0.238073 | 0.304765 |
| PWRN1     | -0.119369207 | 0.006687 | 0.012273 |
| PWRN2     | -0.018219435 | 0.679977 | 0.737197 |
| PWWP2A    | -0.230956851 | 1.16E-07 | 4.71E-07 |
| PWWP2B    | -0.063297133 | 0.151461 | 0.205611 |
| PXDNL     | 0.058834854  | 0.182504 | 0.241934 |
| PXDN      | 0.021707238  | 0.623089 | 0.685993 |
| PXK       | -0.138748928 | 0.001598 | 0.003274 |
| PXMP2     | 0.201586717  | 4.01E-06 | 1.28E-05 |
| PXMP4     | -0.270938458 | 4.08E-10 | 2.40E-09 |
| PXN       | 0.035628582  | 0.419763 | 0.494377 |
| PXT1      | -0.221379079 | 3.88E-07 | 1.45E-06 |
| PYCARD    | -0.19832319  | 5.76E-06 | 1.79E-05 |
| PYCR1     | 0.376892259  | 7.92E-19 | 1.75E-17 |
| PYCR2     | -0.193168591 | 1.01E-05 | 3.03E-05 |
| PYCRL     | 0.249741278  | 9.19E-09 | 4.42E-08 |
| PYDC1     | -0.031921322 | 0.469782 | 0.543529 |
| PYGB      | -0.01525639  | 0.729793 | 0.781066 |
| PYGL      | 0.369399165  | 4.28E-18 | 8.47E-17 |
| PYGM      | -0.363262696 | 1.65E-17 | 2.96E-16 |
| PYGO1     | 0.036523707  | 0.408171 | 0.482838 |
| PYGO2     | 0.016579838  | 0.707387 | 0.761936 |
| PYHIN1    | -0.151622982 | 0.000555 | 0.001235 |
| PYROXD1   | 0.13602888   | 0.001976 | 0.003988 |
| PYROXD2   | -0.339081392 | 2.54E-15 | 3.31E-14 |
| PYY2      | 0.054046074  | 0.220796 | 0.285574 |
| PYY       | 0.099141325  | 0.024452 | 0.039989 |
| PZP       | -0.208295533 | 1.86E-06 | 6.26E-06 |
| ProSAPiP1 | -0.222590656 | 3.34E-07 | 1.27E-06 |
| QARS      | -0.02755814  | 0.532632 | 0.604146 |
| QDPR      | 0.033893379  | 0.442776 | 0.516981 |
| QKI       | -0.061890806 | 0.160779 | 0.216626 |
| QPCTL     | -0.000224407 | 0.995947 | 0.997294 |
| QPCT      | 0.175319707  | 6.33E-05 | 0.000166 |
| QPRT      | 0.10185599   | 0.020784 | 0.034525 |
| QRFPR     | -0.009461079 | 0.8304   | 0.865111 |
| QRFP      | -0.016518442 | 0.708421 | 0.762762 |
| QRICH1    | -0.072766445 | 0.099044 | 0.141083 |
| QRICH2    | -0.20082038  | 4.37E-06 | 1.38E-05 |
| QRSL1     | 0.121650095  | 0.005705 | 0.010603 |
| QSER1     | 0.153714068  | 0.000464 | 0.001047 |
| QSOX1     | -0.074725508 | 0.090258 | 0.129799 |
| QSOX2     | 0.160785073  | 0.000249 | 0.00059  |

|           |              |          |          |
|-----------|--------------|----------|----------|
| QTRT1     | -0.16046155  | 0.000256 | 0.000606 |
| QTRTD1    | 0.126757567  | 0.003961 | 0.007573 |
| R3HCC1    | -0.050577864 | 0.251903 | 0.320051 |
| R3HDM1    | 0.400141634  | 3.18E-21 | 1.00E-19 |
| R3HDM2    | -0.088220672 | 0.045383 | 0.070048 |
| R3HDML    | 0.063968432  | 0.147161 | 0.200426 |
| RAB10     | 0.480451661  | 4.23E-31 | 5.60E-29 |
| RAB11A    | 0.176361049  | 5.72E-05 | 0.000151 |
| RAB11B    | -0.246806235 | 1.38E-08 | 6.48E-08 |
| RAB11FIP1 | -0.343273937 | 1.09E-15 | 1.50E-14 |
| RAB11FIP2 | -0.210919173 | 1.37E-06 | 4.70E-06 |
| RAB11FIP3 | -0.342290915 | 1.33E-15 | 1.81E-14 |
| RAB11FIP4 | -0.346901393 | 5.21E-16 | 7.55E-15 |
| RAB11FIP5 | -0.076830273 | 0.081527 | 0.118571 |
| RAB12     | -0.07648925  | 0.082893 | 0.120342 |
| RAB13     | 0.054743009  | 0.214891 | 0.279039 |
| RAB14     | -0.055054358 | 0.21229  | 0.276002 |
| RAB15     | 0.031043993  | 0.482082 | 0.555893 |
| RAB17     | -0.315252711 | 2.40E-13 | 2.30E-12 |
| RAB18     | 0.242366908  | 2.55E-08 | 1.15E-07 |
| RAB19     | -0.055714032 | 0.206855 | 0.269901 |
| RAB1A     | 0.270304537  | 4.50E-10 | 2.63E-09 |
| RAB1B     | 0.07753303   | 0.078769 | 0.115048 |
| RAB20     | -0.217138409 | 6.52E-07 | 2.36E-06 |
| RAB21     | 0.103906381  | 0.018341 | 0.030803 |
| RAB22A    | 0.117246945  | 0.007734 | 0.014022 |
| RAB23     | 0.207727287  | 1.99E-06 | 6.65E-06 |
| RAB24     | -0.233739225 | 8.05E-08 | 3.36E-07 |
| RAB25     | -0.115935289 | 0.008451 | 0.015199 |
| RAB26     | 0.027844823  | 0.528376 | 0.600511 |
| RAB27A    | -0.209685447 | 1.58E-06 | 5.37E-06 |
| RAB27B    | 0.03548907   | 0.421587 | 0.496241 |
| RAB28     | -0.002174508 | 0.960738 | 0.969909 |
| RAB2A     | 0.326973475  | 2.69E-14 | 2.98E-13 |
| RAB2B     | -0.02458638  | 0.577745 | 0.645149 |
| RAB30     | -0.087289232 | 0.047718 | 0.073255 |
| RAB31     | 0.067320248  | 0.12707  | 0.175879 |
| RAB32     | 0.049650359  | 0.260715 | 0.32953  |
| RAB33A    | -0.070711531 | 0.108977 | 0.153516 |
| RAB33B    | -0.041045835 | 0.352575 | 0.427185 |
| RAB34     | 0.065590214  | 0.137157 | 0.188405 |
| RAB35     | 0.232780827  | 9.12E-08 | 3.78E-07 |
| RAB36     | -0.288471524 | 2.51E-11 | 1.76E-10 |
| RAB37     | -0.342070219 | 1.39E-15 | 1.89E-14 |

|          |              |          |          |
|----------|--------------|----------|----------|
| RAB38    | -0.122726704 | 0.005289 | 0.009891 |
| RAB39B   | -0.042280699 | 0.338265 | 0.412321 |
| RAB39    | 0.006346399  | 0.885758 | 0.910388 |
| RAB3A    | -0.105208309 | 0.016923 | 0.028617 |
| RAB3B    | 0.289380634  | 2.16E-11 | 1.53E-10 |
| RAB3C    | -0.03304463  | 0.454289 | 0.528325 |
| RAB3D    | 0.063476604  | 0.150302 | 0.20419  |
| RAB3GAP1 | -0.093991432 | 0.032962 | 0.052381 |
| RAB3GAP2 | 0.120784898  | 0.006061 | 0.011202 |
| RAB3IL1  | -0.089132871 | 0.043191 | 0.066949 |
| RAB3IP   | 0.057734128  | 0.190838 | 0.251565 |
| RAB40AL  | -0.246366515 | 1.47E-08 | 6.86E-08 |
| RAB40A   | -0.229326088 | 1.43E-07 | 5.73E-07 |
| RAB40B   | -0.225232377 | 2.40E-07 | 9.30E-07 |
| RAB40C   | -0.197263416 | 6.48E-06 | 2.00E-05 |
| RAB41    | -0.146794292 | 0.000834 | 0.001798 |
| RAB42    | 0.003232668  | 0.941661 | 0.953778 |
| RAB43    | -0.253057034 | 5.75E-09 | 2.85E-08 |
| RAB4A    | -0.026004653 | 0.555992 | 0.625425 |
| RAB4B    | -0.265208478 | 9.73E-10 | 5.43E-09 |
| RAB5A    | 0.077152812  | 0.080251 | 0.116982 |
| RAB5B    | -0.093283852 | 0.034309 | 0.054323 |
| RAB5C    | 0.072993361  | 0.097992 | 0.139715 |
| RAB6A    | 0.322654632  | 6.09E-14 | 6.36E-13 |
| RAB6B    | 0.001143687  | 0.979344 | 0.98471  |
| RAB6C    | 0.137098033  | 0.001818 | 0.003691 |
| RAB7A    | 0.115485535  | 0.008711 | 0.015623 |
| RAB7L1   | -0.169690948 | 0.000109 | 0.000276 |
| RAB8A    | -0.03283439  | 0.457166 | 0.531146 |
| RAB8B    | -0.047478066 | 0.282179 | 0.352843 |
| RAB9A    | 0.041405068  | 0.348373 | 0.422812 |
| RAB9BP1  | 0.022560508  | 0.609491 | 0.673848 |
| RAB9B    | -0.203032808 | 3.40E-06 | 1.09E-05 |
| RABAC1   | 0.025091003  | 0.569959 | 0.63812  |
| RABEP1   | -0.112168116 | 0.010854 | 0.01913  |
| RABEP2   | -0.297485009 | 5.53E-12 | 4.30E-11 |
| RABEPK   | 0.335948679  | 4.72E-15 | 5.88E-14 |
| RABGAP1L | -0.169648363 | 0.000109 | 0.000277 |
| RABGAP1  | -0.196332555 | 7.18E-06 | 2.19E-05 |
| RABGEF1  | 0.147004787  | 0.000819 | 0.00177  |
| RABGGTA  | -0.028374911 | 0.520553 | 0.59263  |
| RABGGTB  | 0.182550146  | 3.08E-05 | 8.51E-05 |
| RABIF    | 0.200292307  | 4.63E-06 | 1.46E-05 |
| RABL2A   | -0.417225832 | 4.14E-23 | 1.73E-21 |

|          |              |          |          |
|----------|--------------|----------|----------|
| RABL2B   | -0.345433756 | 7.04E-16 | 9.94E-15 |
| RABL3    | 0.116463148  | 0.008156 | 0.014729 |
| RABL5    | 0.06145132   | 0.163777 | 0.220206 |
| RAC1     | 0.182906483  | 2.97E-05 | 8.23E-05 |
| RAC2     | -0.140849864 | 0.001352 | 0.002808 |
| RAC3     | 0.194242851  | 9.01E-06 | 2.71E-05 |
| RACGAP1P | 0.383746703  | 1.63E-19 | 4.01E-18 |
| RACGAP1  | 0.528668833  | 2.02E-38 | 1.16E-35 |
| RAD17    | -0.113895324 | 0.009686 | 0.017251 |
| RAD18    | 0.333088648  | 8.27E-15 | 9.85E-14 |
| RAD1     | 0.014501854  | 0.742672 | 0.791793 |
| RAD21L1  | 0.196503966  | 7.04E-06 | 2.16E-05 |
| RAD21    | 0.360101933  | 3.26E-17 | 5.65E-16 |
| RAD23A   | 0.097535771  | 0.026874 | 0.043615 |
| RAD23B   | 0.344833276  | 7.96E-16 | 1.11E-14 |
| RAD50    | 0.043219959  | 0.327634 | 0.400952 |
| RAD51AP1 | 0.499272844  | 8.07E-34 | 1.81E-31 |
| RAD51AP2 | 0.003384461  | 0.938926 | 0.951928 |
| RAD51C   | 0.118402182  | 0.007147 | 0.013041 |
| RAD51L1  | -0.029522827 | 0.503816 | 0.576433 |
| RAD51L3  | 0.04318755   | 0.327997 | 0.401322 |
| RAD51    | 0.515953471  | 2.25E-36 | 8.47E-34 |
| RAD52    | 0.024037273  | 0.586272 | 0.652836 |
| RAD54B   | 0.46762355   | 2.43E-29 | 2.40E-27 |
| RAD54L2  | -0.092529373 | 0.035797 | 0.056499 |
| RAD54L   | 0.394902245  | 1.15E-20 | 3.28E-19 |
| RAD9A    | -0.087536693 | 0.047088 | 0.072421 |
| RAD9B    | -0.057796876 | 0.190356 | 0.250995 |
| RADIL    | -0.244288546 | 1.96E-08 | 8.98E-08 |
| RAE1     | 0.304378471  | 1.68E-12 | 1.42E-11 |
| RAET1E   | 0.187888187  | 1.77E-05 | 5.11E-05 |
| RAET1G   | 0.114655716  | 0.009208 | 0.016457 |
| RAET1K   | -0.045500235 | 0.302733 | 0.374445 |
| RAET1L   | 0.059144005  | 0.180212 | 0.239468 |
| RAF1     | -0.076829299 | 0.081531 | 0.118571 |
| RAG1AP1  | 0.172628046  | 8.23E-05 | 0.000212 |
| RAG1     | 0.051991196  | 0.238877 | 0.305677 |
| RAG2     | 0.003743309  | 0.932466 | 0.947155 |
| RAGE     | -0.101703589 | 0.020977 | 0.034824 |
| RAI14    | -0.127288292 | 0.003811 | 0.007298 |
| RAI1     | -0.230191526 | 1.28E-07 | 5.17E-07 |
| RAI2     | -0.433708789 | 4.93E-25 | 2.78E-23 |
| RALA     | 0.353503256  | 1.32E-16 | 2.07E-15 |
| RALBP1   | 0.159201221  | 0.000286 | 0.000672 |

|          |              |          |          |
|----------|--------------|----------|----------|
| RALB     | 0.179430801  | 4.22E-05 | 0.000114 |
| RALGAPA1 | -0.046525181 | 0.291961 | 0.363225 |
| RALGAPA2 | -0.234389682 | 7.39E-08 | 3.10E-07 |
| RALGAPB  | 0.036718633  | 0.405672 | 0.480423 |
| RALGDS   | -0.36468722  | 1.21E-17 | 2.22E-16 |
| RALGPS1  | -0.469051765 | 1.56E-29 | 1.61E-27 |
| RALGPS2  | 0.185745876  | 2.22E-05 | 6.28E-05 |
| RALYL    | 0.046728794  | 0.289852 | 0.361014 |
| RALY     | -0.05684656  | 0.19776  | 0.259508 |
| RAMP1    | 0.053878118  | 0.222236 | 0.287099 |
| RAMP2    | -0.237438463 | 4.94E-08 | 2.13E-07 |
| RAMP3    | -0.307059237 | 1.05E-12 | 9.15E-12 |
| RANBP10  | -0.229000949 | 1.49E-07 | 5.95E-07 |
| RANBP17  | -0.244297542 | 1.96E-08 | 8.97E-08 |
| RANBP1   | 0.418855397  | 2.70E-23 | 1.17E-21 |
| RANBP2   | -0.076731852 | 0.081919 | 0.119075 |
| RANBP3L  | -0.246238878 | 1.50E-08 | 6.97E-08 |
| RANBP3   | -0.266188893 | 8.40E-10 | 4.72E-09 |
| RANBP6   | -0.022072947 | 0.617245 | 0.680802 |
| RANBP9   | -0.03489007  | 0.42947  | 0.504126 |
| RANGAP1  | 0.173301953  | 7.71E-05 | 0.000199 |
| RANGRF   | 0.050790582  | 0.249912 | 0.317905 |
| RAN      | 0.569847355  | 1.12E-45 | 2.25E-42 |
| RAP1A    | -0.070337024 | 0.110869 | 0.155863 |
| RAP1B    | 0.143817892  | 0.001065 | 0.002253 |
| RAP1GAP2 | 0.120955461  | 0.00599  | 0.011085 |
| RAP1GAP  | -0.339363392 | 2.40E-15 | 3.14E-14 |
| RAP1GDS1 | 0.194457207  | 8.80E-06 | 2.66E-05 |
| RAP2A    | 0.199619276  | 4.99E-06 | 1.56E-05 |
| RAP2B    | -0.022425205 | 0.611638 | 0.675849 |
| RAP2C    | 0.184527489  | 2.51E-05 | 7.05E-05 |
| RAPGEF1  | -0.190589418 | 1.33E-05 | 3.92E-05 |
| RAPGEF2  | -0.258264412 | 2.72E-09 | 1.40E-08 |
| RAPGEF3  | -0.370662148 | 3.23E-18 | 6.47E-17 |
| RAPGEF4  | -0.21960144  | 4.83E-07 | 1.79E-06 |
| RAPGEF5  | -0.354604167 | 1.05E-16 | 1.66E-15 |
| RAPGEF6  | -0.093573347 | 0.033752 | 0.053539 |
| RAPGEFL1 | -0.074049259 | 0.093217 | 0.133459 |
| RAPH1    | -0.168316231 | 0.000124 | 0.000311 |
| RAPSN    | -0.182610704 | 3.06E-05 | 8.46E-05 |
| RARA     | -0.302661958 | 2.27E-12 | 1.87E-11 |
| RARB     | -0.010610806 | 0.81016  | 0.848226 |
| RARG     | -0.051836983 | 0.240275 | 0.307289 |
| RARRES1  | 0.050011866  | 0.257256 | 0.326002 |

|          |              |          |          |
|----------|--------------|----------|----------|
| RARRES2  | -0.08182648  | 0.063519 | 0.094876 |
| RARRES3  | -0.224999003 | 2.47E-07 | 9.55E-07 |
| RARS2    | 0.070377878  | 0.110662 | 0.155593 |
| RARS     | 0.333107635  | 8.24E-15 | 9.83E-14 |
| RASA1    | -0.096009517 | 0.029366 | 0.047244 |
| RASA2    | -0.095584894 | 0.030093 | 0.048321 |
| RASA3    | -0.091499779 | 0.037915 | 0.059504 |
| RASA4P   | -0.223029659 | 3.16E-07 | 1.20E-06 |
| RASA4    | -0.157659461 | 0.000329 | 0.000761 |
| RASAL1   | 0.052206961  | 0.236931 | 0.303576 |
| RASAL2   | 0.076826988  | 0.08154  | 0.118575 |
| RASAL3   | -0.289180378 | 2.23E-11 | 1.58E-10 |
| RASD1    | -0.01846558  | 0.675897 | 0.733513 |
| RASD2    | -0.020374533 | 0.644586 | 0.705181 |
| RASEF    | -0.100567426 | 0.022461 | 0.037033 |
| RASGEF1A | -0.016297205 | 0.712151 | 0.765871 |
| RASGEF1B | -0.252144826 | 6.55E-09 | 3.21E-08 |
| RASGEF1C | 0.127951092  | 0.003631 | 0.006978 |
| RASGRF1  | -0.425922629 | 4.12E-24 | 2.01E-22 |
| RASGRF2  | -0.014633788 | 0.740415 | 0.789849 |
| RASGRP1  | -0.204450741 | 2.90E-06 | 9.43E-06 |
| RASGRP2  | -0.430582069 | 1.16E-24 | 6.06E-23 |
| RASGRP3  | -0.119590271 | 0.006586 | 0.012095 |
| RASGRP4  | -0.36921374  | 4.46E-18 | 8.78E-17 |
| RASIP1   | -0.158269345 | 0.000311 | 0.000725 |
| RASL10A  | -0.236017252 | 5.97E-08 | 2.54E-07 |
| RASL10B  | 0.020582417  | 0.641213 | 0.702168 |
| RASL11A  | -0.284582554 | 4.74E-11 | 3.20E-10 |
| RASL11B  | -0.045026047 | 0.307805 | 0.379708 |
| RASL12   | -0.273754108 | 2.64E-10 | 1.60E-09 |
| RASSF10  | -0.150279234 | 0.000623 | 0.001374 |
| RASSF1   | -0.12259085  | 0.00534  | 0.009982 |
| RASSF2   | -0.351959504 | 1.83E-16 | 2.80E-15 |
| RASSF3   | -0.030154173 | 0.494734 | 0.567959 |
| RASSF4   | -0.2250907   | 2.44E-07 | 9.45E-07 |
| RASSF5   | -0.427203976 | 2.92E-24 | 1.47E-22 |
| RASSF6   | 0.033601455  | 0.446717 | 0.521035 |
| RASSF7   | -0.270093586 | 4.64E-10 | 2.71E-09 |
| RASSF8   | -0.105551341 | 0.016565 | 0.028072 |
| RASSF9   | 0.064775974  | 0.142112 | 0.194424 |
| RAVER1   | -0.052810664 | 0.231545 | 0.297676 |
| RAVER2   | -0.205111195 | 2.69E-06 | 8.78E-06 |
| RAX2     | -0.022240751 | 0.614571 | 0.678329 |
| RAX      | 0.05806841   | 0.188278 | 0.248735 |

|        |              |          |          |
|--------|--------------|----------|----------|
| RB1CC1 | 0.164199738  | 0.000182 | 0.000444 |
| RB1    | 0.106602888  | 0.015511 | 0.026442 |
| RBAK   | -0.112886117 | 0.010354 | 0.01832  |
| RBBP4  | 0.11588455   | 0.00848  | 0.015247 |
| RBBP5  | 0.167603854  | 0.000133 | 0.000331 |
| RBBP6  | -0.129394184 | 0.003265 | 0.006331 |
| RBBP7  | 0.213642465  | 9.92E-07 | 3.49E-06 |
| RBBP8  | 0.155907589  | 0.000383 | 0.000877 |
| RBBP9  | -0.052362435 | 0.235536 | 0.302108 |
| RBCK1  | -0.009701084 | 0.826165 | 0.861553 |
| RBKS   | -0.105461758 | 0.016658 | 0.028205 |
| RBL1   | 0.243567791  | 2.16E-08 | 9.83E-08 |
| RBL2   | -0.342351197 | 1.32E-15 | 1.79E-14 |
| RBM10  | -0.048297421 | 0.273947 | 0.344229 |
| RBM11  | -0.198340573 | 5.75E-06 | 1.79E-05 |
| RBM12B | -0.020764203 | 0.638269 | 0.699513 |
| RBM12  | 0.240053162  | 3.48E-08 | 1.54E-07 |
| RBM14  | 0.010963664  | 0.803973 | 0.843196 |
| RBM15B | 0.015239986  | 0.730072 | 0.781276 |
| RBM15  | 0.091004902  | 0.038971 | 0.060974 |
| RBM16  | -0.094753911 | 0.031561 | 0.050399 |
| RBM17  | 0.222529248  | 3.36E-07 | 1.28E-06 |
| RBM18  | 0.135102895  | 0.002122 | 0.004264 |
| RBM19  | 0.023369137  | 0.596727 | 0.662484 |
| RBM20  | -0.138107647 | 0.00168  | 0.003433 |
| RBM22  | -0.077184799 | 0.080126 | 0.116842 |
| RBM23  | 0.107231056  | 0.014909 | 0.025549 |
| RBM24  | -0.011218249 | 0.799517 | 0.839546 |
| RBM25  | -0.091876021 | 0.037129 | 0.058367 |
| RBM26  | 0.030957129  | 0.483309 | 0.557051 |
| RBM27  | 0.192559019  | 1.08E-05 | 3.22E-05 |
| RBM28  | 0.314382869  | 2.81E-13 | 2.67E-12 |
| RBM33  | -0.311405468 | 4.82E-13 | 4.41E-12 |
| RBM34  | 0.269411728  | 5.15E-10 | 2.99E-09 |
| RBM38  | 0.016616207  | 0.706775 | 0.761405 |
| RBM39  | -0.20901275  | 1.71E-06 | 5.79E-06 |
| RBM3   | 0.121135267  | 0.005915 | 0.010957 |
| RBM41  | 0.019814646  | 0.653708 | 0.713421 |
| RBM42  | 0.057677751  | 0.191272 | 0.252071 |
| RBM43  | -0.307142846 | 1.03E-12 | 9.02E-12 |
| RBM44  | -0.162309919 | 0.000216 | 0.00052  |
| RBM45  | 0.210043292  | 1.52E-06 | 5.17E-06 |
| RBM46  | 0.018863339  | 0.669325 | 0.727367 |
| RBM47  | -0.028557207 | 0.517876 | 0.590087 |

|          |              |          |          |
|----------|--------------|----------|----------|
| RBM4B    | -0.059912779 | 0.174605 | 0.233025 |
| RBM4     | 0.182745292  | 3.02E-05 | 8.36E-05 |
| RBM5     | -0.373266414 | 1.80E-18 | 3.73E-17 |
| RBM6     | -0.304951221 | 1.52E-12 | 1.29E-11 |
| RBM7     | 0.218779186  | 5.34E-07 | 1.96E-06 |
| RBM8A    | 0.183058942  | 2.92E-05 | 8.11E-05 |
| RBM9     | -0.075815001 | 0.085649 | 0.123902 |
| RBMS1    | -0.094603749 | 0.031833 | 0.050785 |
| RBMS2    | -0.254724664 | 4.53E-09 | 2.27E-08 |
| RBMS3    | -0.278125438 | 1.33E-10 | 8.42E-10 |
| RBMX2    | 0.132882184  | 0.002514 | 0.004979 |
| RBMXL1   | 0.097044079  | 0.027656 | 0.044746 |
| RBMXL2   | -0.233539465 | 8.26E-08 | 3.44E-07 |
| RBMXL3   | -0.023894494 | 0.588499 | 0.654842 |
| RBMX     | 0.092235601  | 0.036391 | 0.057328 |
| RBMX1A1  | 0.072460513  | 0.100475 | 0.142888 |
| RBMX1A3P | 0.022914934  | 0.603881 | 0.668867 |
| RBMX1B   | 0.131214083  | 0.002851 | 0.005587 |
| RBMX1E   | -0.014041803 | 0.75056  | 0.798684 |
| RBMX1F   | 0.028948341  | 0.512157 | 0.584436 |
| RBMX1J   | 0.125863111  | 0.004227 | 0.008034 |
| RBMX2EP  | 0.163877087  | 0.000188 | 0.000456 |
| RBMX2FP  | 0.198022553  | 5.96E-06 | 1.85E-05 |
| RBP1     | 0.010976567  | 0.803747 | 0.843013 |
| RBP2     | -0.169378014 | 0.000112 | 0.000283 |
| RBP3     | 0.04658772   | 0.291312 | 0.362539 |
| RBP4     | -0.07802882  | 0.076869 | 0.11261  |
| RBP5     | -0.328743039 | 1.92E-14 | 2.17E-13 |
| RBP7     | -0.006392611 | 0.884932 | 0.90983  |
| RBPJL    | 0.006513425  | 0.882772 | 0.908053 |
| RBPJ     | 0.064898809  | 0.141356 | 0.193509 |
| RBPMS2   | 0.12304442   | 0.005171 | 0.009691 |
| RBPMS    | -0.39497682  | 1.13E-20 | 3.23E-19 |
| RBX1     | 0.100008887  | 0.023223 | 0.038184 |
| RC3H1    | -0.232765119 | 9.14E-08 | 3.79E-07 |
| RC3H2    | 0.086878435  | 0.048779 | 0.074786 |
| RCAN1    | -0.235178604 | 6.66E-08 | 2.81E-07 |
| RCAN2    | -0.285717407 | 3.94E-11 | 2.69E-10 |
| RCAN3    | 0.077830166  | 0.077625 | 0.113544 |
| RCBTB1   | -0.06657805  | 0.131324 | 0.181153 |
| RCBTB2   | -0.320175533 | 9.68E-14 | 9.81E-13 |
| RCC1     | 0.22294335   | 3.19E-07 | 1.22E-06 |
| RCC2     | 0.124989549  | 0.004501 | 0.008522 |
| RCCD1    | 0.199645212  | 4.98E-06 | 1.56E-05 |



|        |              |          |          |
|--------|--------------|----------|----------|
| RCE1   | 0.161502217  | 0.000233 | 0.000556 |
| RCHY1  | 0.072102038  | 0.102173 | 0.144922 |
| RCL1   | 0.13123178   | 0.002847 | 0.00558  |
| RCN1   | 0.179772109  | 4.07E-05 | 0.00011  |
| RCN2   | 0.201933003  | 3.85E-06 | 1.23E-05 |
| RCN3   | 0.015271284  | 0.729539 | 0.780915 |
| RCOR1  | 0.043894501  | 0.320134 | 0.39288  |
| RCOR2  | 0.301064364  | 2.99E-12 | 2.41E-11 |
| RCOR3  | -0.243235484 | 2.26E-08 | 1.03E-07 |
| RCSD1  | -0.248405045 | 1.11E-08 | 5.26E-08 |
| RCVRN  | -0.176602832 | 5.58E-05 | 0.000148 |
| RD3    | -0.1789296   | 4.43E-05 | 0.000119 |
| RDBP   | 0.280028357  | 9.85E-11 | 6.35E-10 |
| RDH10  | 0.188109161  | 1.73E-05 | 5.00E-05 |
| RDH11  | 0.32966487   | 1.61E-14 | 1.84E-13 |
| RDH12  | 0.112868021  | 0.010367 | 0.01834  |
| RDH13  | -0.145542262 | 0.000925 | 0.001977 |
| RDH14  | 0.133397138  | 0.002418 | 0.004804 |
| RDH16  | 0.01811601   | 0.681694 | 0.738761 |
| RDH5   | -0.047610302 | 0.280839 | 0.351497 |
| RDH8   | 0.136831825  | 0.001856 | 0.003763 |
| RDM1   | 0.210699309  | 1.41E-06 | 4.82E-06 |
| RDX    | 0.270363377  | 4.46E-10 | 2.61E-09 |
| REC8   | -0.166148221 | 0.000152 | 0.000375 |
| RECK   | -0.166361252 | 0.000149 | 0.000369 |
| RECQL4 | 0.30017705   | 3.49E-12 | 2.78E-11 |
| RECQL5 | -0.263917921 | 1.18E-09 | 6.48E-09 |
| RECQL  | 0.260345567  | 2.00E-09 | 1.06E-08 |
| REEP1  | -0.261853401 | 1.60E-09 | 8.61E-09 |
| REEP2  | 0.075454311  | 0.087153 | 0.125852 |
| REEP3  | 0.251724767  | 6.95E-09 | 3.40E-08 |
| REEP4  | 0.047971109  | 0.277206 | 0.34769  |
| REEP5  | -0.151617497 | 0.000556 | 0.001236 |
| REEP6  | -0.039817564 | 0.367181 | 0.441802 |
| REG1A  | -0.013470132 | 0.760399 | 0.80699  |
| REG1B  | 0.092163271  | 0.036538 | 0.057516 |
| REG1P  | -0.052129576 | 0.237628 | 0.304293 |
| REG3A  | -0.019221814 | 0.663423 | 0.722092 |
| REG3G  | 0.014738913  | 0.738618 | 0.788564 |
| REG4   | 0.021917298  | 0.61973  | 0.682939 |
| RELA   | 0.106034     | 0.016074 | 0.027301 |
| RELB   | 0.051727736  | 0.241269 | 0.308422 |
| RELL1  | -0.116112922 | 0.008351 | 0.015043 |
| RELL2  | -0.129545365 | 0.003228 | 0.006268 |

|         |              |          |          |
|---------|--------------|----------|----------|
| RELN    | -0.007103657 | 0.872237 | 0.900391 |
| RELT    | -0.061510793 | 0.163369 | 0.219701 |
| REL     | -0.245516812 | 1.65E-08 | 7.65E-08 |
| REM1    | -0.282056025 | 7.12E-11 | 4.68E-10 |
| REM2    | -0.054254028 | 0.219022 | 0.283537 |
| RENBP   | -0.280745852 | 8.78E-11 | 5.70E-10 |
| REN     | -0.248248264 | 1.13E-08 | 5.37E-08 |
| REP15   | 0.084221067  | 0.056129 | 0.084903 |
| REPIN1  | 0.011993837  | 0.785982 | 0.828073 |
| REPS1   | 0.151651051  | 0.000554 | 0.001233 |
| REPS2   | -0.382799415 | 2.03E-19 | 4.91E-18 |
| RER1    | -0.027718846 | 0.530245 | 0.601881 |
| RERE    | -0.33798464  | 3.15E-15 | 4.06E-14 |
| RERGL   | -0.110923935 | 0.011771 | 0.020562 |
| RERG    | -0.285573708 | 4.03E-11 | 2.75E-10 |
| RESP18  | 0.015351917  | 0.728167 | 0.779697 |
| REST    | 0.029068507  | 0.510406 | 0.582705 |
| RETNLB  | 0.177969885  | 4.88E-05 | 0.00013  |
| RETN    | -0.217888645 | 5.95E-07 | 2.17E-06 |
| RETSAT  | -0.055612981 | 0.207681 | 0.270873 |
| RET     | 0.037647486  | 0.39389  | 0.468775 |
| REV1    | -0.43851789  | 1.29E-25 | 7.97E-24 |
| REV3L   | -0.326519368 | 2.93E-14 | 3.23E-13 |
| REXO1L1 | 0.001645769  | 0.97028  | 0.977665 |
| REXO1   | -0.105532711 | 0.016584 | 0.0281   |
| REXO2   | 0.079284861  | 0.072222 | 0.106481 |
| REXO4   | 0.137815876  | 0.001719 | 0.003506 |
| RFC1    | 0.023316571  | 0.597553 | 0.663107 |
| RFC2    | 0.351341478  | 2.08E-16 | 3.16E-15 |
| RFC3    | 0.43962989   | 9.45E-26 | 5.96E-24 |
| RFC4    | 0.369319058  | 4.35E-18 | 8.61E-17 |
| RFC5    | 0.403331819  | 1.44E-21 | 4.83E-20 |
| RFESD   | -0.072706334 | 0.099324 | 0.141432 |
| RFFL    | 0.217569997  | 6.19E-07 | 2.25E-06 |
| RFK     | 0.308492351  | 8.12E-13 | 7.22E-12 |
| RFNG    | -0.03879546  | 0.379618 | 0.454332 |
| RFPL1S  | -0.053956175 | 0.221566 | 0.286348 |
| RFPL1   | 0.053499264  | 0.225509 | 0.290823 |
| RFPL2   | -0.166242742 | 0.000151 | 0.000373 |
| RFPL3S  | -0.254971586 | 4.37E-09 | 2.20E-08 |
| RFPL3   | -0.036911703 | 0.403206 | 0.477866 |
| RFPL4A  | -0.071802833 | 0.103608 | 0.146686 |
| RFPL4B  | 0.049272037  | 0.26437  | 0.333643 |
| RFT1    | 0.183796018  | 2.71E-05 | 7.56E-05 |

|         |              |          |          |
|---------|--------------|----------|----------|
| RFTN1   | -0.300068673 | 3.55E-12 | 2.83E-11 |
| RFTN2   | -0.113604026 | 0.009875 | 0.01756  |
| RFWD2   | 0.191396513  | 1.22E-05 | 3.62E-05 |
| RFWD3   | 0.303729461  | 1.88E-12 | 1.57E-11 |
| RFX1    | -0.277905669 | 1.38E-10 | 8.70E-10 |
| RFX2    | -0.399023788 | 4.19E-21 | 1.30E-19 |
| RFX3    | 0.012209248  | 0.782234 | 0.824864 |
| RFX4    | -0.05521683  | 0.210942 | 0.274535 |
| RFX5    | -0.193354174 | 9.92E-06 | 2.97E-05 |
| RFX6    | 0.145848818  | 0.000902 | 0.001931 |
| RFX7    | -0.03387339  | 0.443045 | 0.517265 |
| RFX8    | 0.206603602  | 2.26E-06 | 7.49E-06 |
| RFXANK  | -0.025242945 | 0.567625 | 0.636183 |
| RFXAP   | -0.249851233 | 9.05E-09 | 4.36E-08 |
| RG9MTD1 | 0.343793653  | 9.83E-16 | 1.36E-14 |
| RG9MTD2 | 0.312278812  | 4.12E-13 | 3.82E-12 |
| RG9MTD3 | -0.302504333 | 2.33E-12 | 1.91E-11 |
| RGAG1   | -0.025212582 | 0.568091 | 0.636598 |
| RGAG4   | -0.378969717 | 4.92E-19 | 1.12E-17 |
| RGL1    | -0.348975781 | 3.40E-16 | 5.04E-15 |
| RGL2    | -0.243651387 | 2.14E-08 | 9.73E-08 |
| RGL3    | -0.307472679 | 9.73E-13 | 8.54E-12 |
| RGL4    | -0.220218711 | 4.48E-07 | 1.67E-06 |
| RGMA    | -0.404352232 | 1.12E-21 | 3.78E-20 |
| RGMB    | -0.278459549 | 1.26E-10 | 8.02E-10 |
| RGNEF   | -0.253233673 | 5.61E-09 | 2.78E-08 |
| RGN     | -0.287002095 | 3.19E-11 | 2.21E-10 |
| RGP1    | 0.108063644  | 0.014144 | 0.024342 |
| RGPD1   | -0.151624965 | 0.000555 | 0.001235 |
| RGPD3   | -0.195414732 | 7.93E-06 | 2.41E-05 |
| RGPD4   | -0.244690555 | 1.85E-08 | 8.52E-08 |
| RGPD5   | -0.200318475 | 4.62E-06 | 1.46E-05 |
| RGPD6   | -0.282304973 | 6.84E-11 | 4.51E-10 |
| RGPD8   | -0.012912967 | 0.770025 | 0.815043 |
| RGR     | -0.032991097 | 0.455021 | 0.529053 |
| RGS10   | 0.029635195  | 0.502193 | 0.575004 |
| RGS11   | -0.348837864 | 3.50E-16 | 5.18E-15 |
| RGS12   | -0.280756129 | 8.77E-11 | 5.70E-10 |
| RGS13   | -0.288543366 | 2.48E-11 | 1.74E-10 |
| RGS14   | -0.116552999 | 0.008106 | 0.014647 |
| RGS16   | -0.159041462 | 0.000291 | 0.000681 |
| RGS17   | 0.113505495  | 0.00994  | 0.017664 |
| RGS18   | -0.159784936 | 0.000272 | 0.00064  |
| RGS19   | -0.082980767 | 0.059863 | 0.089945 |

|         |              |          |          |
|---------|--------------|----------|----------|
| RGS1    | -0.116257559 | 0.00827  | 0.014913 |
| RGS20   | 0.26492347   | 1.02E-09 | 5.64E-09 |
| RGS21   | -0.051133712 | 0.246723 | 0.314408 |
| RGS22   | -0.269950125 | 4.75E-10 | 2.77E-09 |
| RGS2    | 0.002322665  | 0.958065 | 0.967864 |
| RGS3    | -0.297631962 | 5.39E-12 | 4.19E-11 |
| RGS4    | 0.147064993  | 0.000815 | 0.001762 |
| RGS5    | -0.172352315 | 8.45E-05 | 0.000217 |
| RGS6    | -0.24127531  | 2.95E-08 | 1.31E-07 |
| RGS7BP  | -0.243693858 | 2.12E-08 | 9.68E-08 |
| RGS7    | -0.040182345 | 0.362804 | 0.437378 |
| RGS8    | -0.021117127 | 0.63257  | 0.694181 |
| RGS9BP  | -0.03653527  | 0.408022 | 0.48272  |
| RGS9    | -0.33194261  | 1.03E-14 | 1.21E-13 |
| RGSL1   | -0.001175686 | 0.978766 | 0.984331 |
| RHAG    | 0.028755039  | 0.514979 | 0.587322 |
| RHBDD1  | 0.011105037  | 0.801498 | 0.840875 |
| RHBDD2  | -0.122035793 | 0.005553 | 0.010347 |
| RHBDD3  | 0.04031027   | 0.361277 | 0.43596  |
| RHBDF1  | -0.233444249 | 8.37E-08 | 3.49E-07 |
| RHBDF2  | -0.040278291 | 0.361659 | 0.436287 |
| RHBDL1  | -0.111023824 | 0.011695 | 0.020447 |
| RHBDL2  | -0.042907284 | 0.331149 | 0.404708 |
| RHBDL3  | -0.304699992 | 1.59E-12 | 1.35E-11 |
| RHBG    | 0.116087645  | 0.008365 | 0.015067 |
| RHCE    | -0.12999224  | 0.003123 | 0.00608  |
| RHCG    | 0.176774229  | 5.49E-05 | 0.000145 |
| RHD     | -0.225980562 | 2.18E-07 | 8.51E-07 |
| RHEBL1  | 0.098917337  | 0.024778 | 0.040479 |
| RHEB    | 0.236964153  | 5.26E-08 | 2.25E-07 |
| RHOA    | 0.055480751  | 0.208765 | 0.272083 |
| RHOBTB1 | 0.032239926  | 0.465358 | 0.539191 |
| RHOBTB2 | -0.321888499 | 7.03E-14 | 7.30E-13 |
| RHOBTB3 | 0.123060848  | 0.005165 | 0.009681 |
| RHOB    | -0.057864367 | 0.189838 | 0.250427 |
| RHOC    | 0.123072943  | 0.005161 | 0.009675 |
| RHOD    | 0.103442519  | 0.01887  | 0.0316   |
| RHOF    | 0.214145095  | 9.35E-07 | 3.30E-06 |
| RHOG    | -0.085621967 | 0.052147 | 0.079439 |
| RHOH    | -0.010507617 | 0.811972 | 0.849811 |
| RHOJ    | -0.220912203 | 4.11E-07 | 1.54E-06 |
| RHOQ    | 0.064873731  | 0.14151  | 0.193707 |
| RHOT1   | -0.00448364  | 0.919151 | 0.936582 |
| RHOT2   | -0.255585663 | 4.00E-09 | 2.02E-08 |

|         |              |          |          |
|---------|--------------|----------|----------|
| RHOU    | -0.072679481 | 0.099449 | 0.14159  |
| RHOV    | 0.280750914  | 8.77E-11 | 5.70E-10 |
| RHOXF1  | -0.179752819 | 4.08E-05 | 0.000111 |
| RHOXF2B | -0.038935764 | 0.377896 | 0.452732 |
| RHO     | -0.052797971 | 0.231658 | 0.297779 |
| RHPN1   | -0.183444445 | 2.81E-05 | 7.81E-05 |
| RHPN2   | 0.230639279  | 1.20E-07 | 4.90E-07 |
| RIBC1   | -0.311603817 | 4.65E-13 | 4.28E-12 |
| RIBC2   | 0.037377927  | 0.397288 | 0.472088 |
| RIC3    | -0.433443814 | 5.30E-25 | 2.99E-23 |
| RIC8A   | 0.035627227  | 0.419781 | 0.494377 |
| RIC8B   | 0.073373906  | 0.096249 | 0.137446 |
| RICH2   | -0.378787247 | 5.14E-19 | 1.17E-17 |
| RICTOR  | 0.011247592  | 0.799004 | 0.839186 |
| RIF1    | 0.182065942  | 3.23E-05 | 8.90E-05 |
| RILPL1  | -0.064579557 | 0.143328 | 0.195926 |
| RILPL2  | -0.440494305 | 7.40E-26 | 4.70E-24 |
| RILP    | -0.214254431 | 9.22E-07 | 3.26E-06 |
| RIMBP2  | -0.088414419 | 0.04491  | 0.069403 |
| RIMBP3C | -0.187685937 | 1.81E-05 | 5.22E-05 |
| RIMBP3  | -0.213511536 | 1.01E-06 | 3.54E-06 |
| RIMKLA  | -0.175870798 | 6.00E-05 | 0.000158 |
| RIMKLB  | 0.024529396  | 0.578627 | 0.645906 |
| RIMS1   | -0.163278481 | 0.000198 | 0.00048  |
| RIMS2   | 0.183831567  | 2.70E-05 | 7.54E-05 |
| RIMS3   | -0.267872423 | 6.51E-10 | 3.72E-09 |
| RIMS4   | -0.199998251 | 4.79E-06 | 1.51E-05 |
| RIN1    | -0.043786036 | 0.321332 | 0.394205 |
| RIN2    | -0.102297794 | 0.020235 | 0.033674 |
| RIN3    | -0.263451427 | 1.27E-09 | 6.90E-09 |
| RING1   | -0.166034738 | 0.000154 | 0.000379 |
| RINL    | -0.138682545 | 0.001606 | 0.003289 |
| RINT1   | 0.292080244  | 1.38E-11 | 1.01E-10 |
| RIOK1   | 0.391133615  | 2.84E-20 | 7.75E-19 |
| RIOK2   | 0.040847386  | 0.35491  | 0.429493 |
| RIOK3   | 0.042367099  | 0.337278 | 0.411244 |
| RIPK1   | -0.101003257 | 0.021881 | 0.036178 |
| RIPK2   | 0.417278188  | 4.09E-23 | 1.71E-21 |
| RIPK3   | -0.339276892 | 2.44E-15 | 3.19E-14 |
| RIPK4   | -0.238975246 | 4.02E-08 | 1.76E-07 |
| RIPPLY1 | -0.10074756  | 0.02222  | 0.03669  |
| RIPPLY2 | 0.112823772  | 0.010397 | 0.018387 |
| RIT1    | 0.041545348  | 0.346741 | 0.421138 |
| RIT2    | 0.045511216  | 0.302617 | 0.374324 |

|          |              |          |          |
|----------|--------------|----------|----------|
| RLBP1    | 0.092215285  | 0.036432 | 0.057375 |
| RLF      | -0.022809917 | 0.605541 | 0.670371 |
| RLIM     | 0.062457583  | 0.156973 | 0.212113 |
| RLN1     | 0.011985137  | 0.786133 | 0.828146 |
| RLN2     | -0.071140386 | 0.106842 | 0.150763 |
| RLN3     | 0.015142803  | 0.731727 | 0.782796 |
| RLTPR    | -0.197874751 | 6.06E-06 | 1.88E-05 |
| RMI1     | 0.319049282  | 1.19E-13 | 1.20E-12 |
| RMND1    | 0.079400155  | 0.071807 | 0.10594  |
| RMND5A   | -0.000402634 | 0.992727 | 0.994633 |
| RMND5B   | -0.229151272 | 1.46E-07 | 5.85E-07 |
| RMRP     | -0.009757294 | 0.825174 | 0.860752 |
| RMST     | -0.153249953 | 0.000483 | 0.001086 |
| RNASE10  | 0.177498114  | 5.11E-05 | 0.000136 |
| RNASE11  | 0.092255261  | 0.036351 | 0.057274 |
| RNASE13  | -0.2637504   | 1.21E-09 | 6.63E-09 |
| RNASE1   | -0.402896916 | 1.61E-21 | 5.34E-20 |
| RNASE2   | 0.040663943  | 0.357076 | 0.43154  |
| RNASE3   | 0.057944124  | 0.189227 | 0.249688 |
| RNASE4   | -0.144539451 | 0.001004 | 0.002135 |
| RNASE6   | -0.200241973 | 4.66E-06 | 1.47E-05 |
| RNASE7   | -0.103476043 | 0.018832 | 0.031543 |
| RNASE8   | -0.098939135 | 0.024746 | 0.040437 |
| RNASE9   | -0.061646204 | 0.162442 | 0.218573 |
| RNASEH1  | 0.379624537  | 4.24E-19 | 9.78E-18 |
| RNASEH2A | 0.370011347  | 3.73E-18 | 7.41E-17 |
| RNASEH2B | 0.060495301  | 0.170445 | 0.228081 |
| RNASEH2C | -0.107876056 | 0.014313 | 0.024604 |
| RNASEK   | 0.003704069  | 0.933172 | 0.947728 |
| RNASEL   | -0.394547155 | 1.25E-20 | 3.55E-19 |
| RNASEN   | 0.04934622   | 0.263651 | 0.332819 |
| RNASET2  | -0.085398316 | 0.052767 | 0.080303 |
| RND1     | 0.056108566  | 0.203653 | 0.266258 |
| RND2     | -0.005942007 | 0.892992 | 0.916233 |
| RND3     | 0.098055764  | 0.026068 | 0.042406 |
| RNF103   | -0.053510294 | 0.225413 | 0.290718 |
| RNF10    | 0.018860505  | 0.669371 | 0.727378 |
| RNF111   | -0.017878649 | 0.685641 | 0.742474 |
| RNF112   | -0.152732564 | 0.000505 | 0.001131 |
| RNF113A  | 0.034671456  | 0.432369 | 0.507022 |
| RNF113B  | 0.007510576  | 0.864986 | 0.894014 |
| RNF114   | 0.010741471  | 0.807868 | 0.846402 |
| RNF115   | 0.243512751  | 2.18E-08 | 9.90E-08 |
| RNF11    | -0.022883182 | 0.604383 | 0.669312 |

|          |              |          |          |
|----------|--------------|----------|----------|
| RNF121   | 0.152397116  | 0.00052  | 0.001162 |
| RNF122   | -0.111299946 | 0.011487 | 0.020136 |
| RNF123   | -0.159879851 | 0.00027  | 0.000636 |
| RNF125   | -0.188451246 | 1.67E-05 | 4.84E-05 |
| RNF126P1 | -0.067833556 | 0.124191 | 0.172288 |
| RNF126   | 0.070624446  | 0.109415 | 0.154078 |
| RNF128   | -0.092036721 | 0.036797 | 0.057882 |
| RNF130   | -0.295862454 | 7.29E-12 | 5.58E-11 |
| RNF133   | -0.213742221 | 9.81E-07 | 3.45E-06 |
| RNF135   | -0.153790329 | 0.000461 | 0.00104  |
| RNF138P1 | 0.076438626  | 0.083098 | 0.120595 |
| RNF138   | 0.157063424  | 0.000346 | 0.000799 |
| RNF139   | 0.184717871  | 2.46E-05 | 6.92E-05 |
| RNF13    | -0.020311034 | 0.645618 | 0.706096 |
| RNF141   | -0.090691583 | 0.039652 | 0.061962 |
| RNF144A  | -0.013731557 | 0.755895 | 0.803106 |
| RNF144B  | -0.32487884  | 4.01E-14 | 4.33E-13 |
| RNF145   | -0.185649819 | 2.24E-05 | 6.33E-05 |
| RNF146   | -0.336659657 | 4.10E-15 | 5.17E-14 |
| RNF148   | -0.099562907 | 0.023848 | 0.039081 |
| RNF149   | 0.144167365  | 0.001035 | 0.002195 |
| RNF14    | 0.103511194  | 0.018791 | 0.031486 |
| RNF150   | -0.129758984 | 0.003177 | 0.006178 |
| RNF151   | 0.008895973  | 0.84039  | 0.873334 |
| RNF152   | -0.038485473 | 0.38344  | 0.458082 |
| RNF157   | 0.041521609  | 0.347017 | 0.421396 |
| RNF160   | 0.027908615  | 0.527432 | 0.59954  |
| RNF165   | -0.239399268 | 3.80E-08 | 1.66E-07 |
| RNF166   | -0.267340878 | 7.06E-10 | 4.02E-09 |
| RNF167   | -0.063621853 | 0.149369 | 0.203074 |
| RNF168   | 0.000909416  | 0.983574 | 0.987775 |
| RNF169   | -0.039583666 | 0.370005 | 0.444824 |
| RNF170   | 0.004657031  | 0.916036 | 0.934312 |
| RNF175   | -0.405766797 | 7.83E-22 | 2.70E-20 |
| RNF17    | -0.083869733 | 0.057167 | 0.086264 |
| RNF180   | -0.162151579 | 0.00022  | 0.000528 |
| RNF181   | 0.050655339  | 0.251177 | 0.319298 |
| RNF182   | -0.101747518 | 0.020921 | 0.034741 |
| RNF183   | 0.123415849  | 0.005037 | 0.009458 |
| RNF185   | -0.144986098 | 0.000968 | 0.002063 |
| RNF186   | 0.22820551   | 1.65E-07 | 6.54E-07 |
| RNF187   | 0.036524539  | 0.40816  | 0.482838 |
| RNF19A   | -0.10943402  | 0.012959 | 0.022462 |
| RNF19B   | -0.125573783 | 0.004316 | 0.008193 |

|         |              |          |          |
|---------|--------------|----------|----------|
| RNF207  | -0.22546365  | 2.33E-07 | 9.05E-07 |
| RNF208  | -0.148973717 | 0.000695 | 0.001523 |
| RNF20   | -0.078162351 | 0.076363 | 0.11198  |
| RNF212  | -0.047893163 | 0.277988 | 0.348562 |
| RNF213  | -0.052220728 | 0.236807 | 0.303456 |
| RNF214  | 0.049687387  | 0.26036  | 0.329184 |
| RNF215  | -0.04864479  | 0.270507 | 0.340384 |
| RNF216L | 0.108944919  | 0.013372 | 0.023107 |
| RNF216  | -0.003607969 | 0.934902 | 0.948955 |
| RNF217  | -0.051202378 | 0.246088 | 0.313759 |
| RNF219  | 0.1544955    | 0.000434 | 0.000984 |
| RNF220  | -0.071151412 | 0.106787 | 0.150707 |
| RNF222  | -0.084685292 | 0.054783 | 0.08308  |
| RNF24   | 0.160075224  | 0.000265 | 0.000625 |
| RNF25   | 0.014336945  | 0.745497 | 0.794338 |
| RNF26   | 0.174692335  | 6.74E-05 | 0.000176 |
| RNF2    | 0.309587598  | 6.68E-13 | 6.01E-12 |
| RNF31   | -0.016559199 | 0.707734 | 0.762146 |
| RNF32   | -0.053867623 | 0.222326 | 0.287182 |
| RNF34   | 0.348990106  | 3.39E-16 | 5.03E-15 |
| RNF38   | -0.244608179 | 1.87E-08 | 8.61E-08 |
| RNF39   | -0.180535043 | 3.77E-05 | 0.000103 |
| RNF40   | -0.082465816 | 0.061472 | 0.092176 |
| RNF41   | 0.192393472  | 1.10E-05 | 3.27E-05 |
| RNF43   | -0.138893779 | 0.001579 | 0.003239 |
| RNF44   | -0.153671823 | 0.000466 | 0.00105  |
| RNF4    | 0.153261047  | 0.000483 | 0.001085 |
| RNF5P1  | 0.009450271  | 0.83059  | 0.86513  |
| RNF5    | -0.043092112 | 0.329068 | 0.402499 |
| RNF6    | 0.124941836  | 0.004517 | 0.008547 |
| RNF7    | 0.268206133  | 6.19E-10 | 3.55E-09 |
| RNF8    | 0.08520025   | 0.05332  | 0.081071 |
| RNFT1   | -0.015573335 | 0.724405 | 0.776376 |
| RNFT2   | 0.207026588  | 2.16E-06 | 7.16E-06 |
| RNGTT   | 0.146216839  | 0.000875 | 0.001878 |
| RNH1    | -0.255721125 | 3.93E-09 | 1.98E-08 |
| RNLS    | -0.003617674 | 0.934727 | 0.948826 |
| RNMTL1  | 0.156810123  | 0.000354 | 0.000815 |
| RNMT    | -0.016254827 | 0.712867 | 0.766476 |
| RNPC3   | -0.407843352 | 4.64E-22 | 1.64E-20 |
| RNPEPL1 | -0.17403564  | 7.18E-05 | 0.000187 |
| RNPEP   | -0.008007074 | 0.856155 | 0.886647 |
| RNPS1   | 0.059283327  | 0.179186 | 0.238317 |
| RNU11   | -0.016280867 | 0.712427 | 0.766044 |



|             |              |          |          |
|-------------|--------------|----------|----------|
| RNU4ATAC    | -0.041283453 | 0.349792 | 0.424405 |
| RNU6ATAC    | 0.037227621  | 0.39919  | 0.473869 |
| ROBLD3      | 0.07112914   | 0.106897 | 0.15083  |
| ROBO1       | 0.005687728  | 0.897546 | 0.919913 |
| ROBO2       | -0.426568837 | 3.46E-24 | 1.74E-22 |
| ROBO3       | -0.26052019  | 1.95E-09 | 1.03E-08 |
| ROBO4       | -0.248671612 | 1.07E-08 | 5.09E-08 |
| ROCK1       | -0.048235565 | 0.274563 | 0.344916 |
| ROCK2       | 0.053185087  | 0.228249 | 0.29394  |
| ROD1        | 0.206182378  | 2.38E-06 | 7.84E-06 |
| ROGDI       | -0.41679942  | 4.63E-23 | 1.91E-21 |
| ROM1        | -0.28849753  | 2.50E-11 | 1.75E-10 |
| ROMO1       | 0.189789053  | 1.45E-05 | 4.25E-05 |
| ROPN1B      | -0.191479606 | 1.21E-05 | 3.59E-05 |
| ROPN1L      | -0.099791013 | 0.023527 | 0.038618 |
| ROPN1       | -0.084455445 | 0.055446 | 0.083965 |
| ROR1        | -0.11566951  | 0.008604 | 0.015443 |
| ROR2        | -0.043840286 | 0.320732 | 0.393542 |
| RORA        | -0.396012326 | 8.76E-21 | 2.56E-19 |
| RORB        | -0.10270119  | 0.019745 | 0.032946 |
| RORC        | -0.224525914 | 2.62E-07 | 1.01E-06 |
| ROS1        | -0.337725972 | 3.32E-15 | 4.25E-14 |
| RP1-177G6.2 | -0.260469169 | 1.97E-09 | 1.04E-08 |
| RP1L1       | 0.055298945  | 0.210263 | 0.273758 |
| RP1         | -0.122233367 | 0.005476 | 0.010218 |
| RP2         | 0.140733106  | 0.001365 | 0.002833 |
| RP9P        | 0.142254345  | 0.001208 | 0.002533 |
| RP9         | 0.106484578  | 0.015626 | 0.026623 |
| RPA1        | 0.066649354  | 0.130911 | 0.18067  |
| RPA2        | -0.058501511 | 0.184999 | 0.244831 |
| RPA3        | 0.253202503  | 5.63E-09 | 2.79E-08 |
| RPA4        | -0.182170908 | 3.20E-05 | 8.81E-05 |
| RPAIN       | -0.087925854 | 0.046112 | 0.071084 |
| RPAP1       | -0.022942783 | 0.603442 | 0.668491 |
| RPAP2       | 0.333329805  | 7.89E-15 | 9.46E-14 |
| RPAP3       | 0.335516039  | 5.14E-15 | 6.38E-14 |
| RPE65       | 0.075845971  | 0.085521 | 0.123734 |
| RPE         | 0.420782025  | 1.63E-23 | 7.19E-22 |
| RPF1        | 0.226083549  | 2.15E-07 | 8.41E-07 |
| RPF2        | 0.353554663  | 1.31E-16 | 2.05E-15 |
| RPGRIP1L    | 0.060562045  | 0.169973 | 0.227587 |
| RPGRIP1     | -0.212746651 | 1.10E-06 | 3.84E-06 |
| RPGR        | -0.164234853 | 0.000181 | 0.000443 |
| RPH3AL      | 0.019981208  | 0.650989 | 0.710842 |

|           |              |          |          |
|-----------|--------------|----------|----------|
| RPH3A     | -0.038734087 | 0.380373 | 0.455072 |
| RPIA      | 0.111694919  | 0.011195 | 0.019669 |
| RPL10A    | 0.096549155  | 0.028463 | 0.045929 |
| RPL10L    | 0.174183636  | 7.08E-05 | 0.000184 |
| RPL10     | 0.075563724  | 0.086695 | 0.125215 |
| RPL11     | -0.071359359 | 0.105764 | 0.149379 |
| RPL12     | 0.124404606  | 0.004694 | 0.008865 |
| RPL13AP17 | -0.355396735 | 8.89E-17 | 1.42E-15 |
| RPL13AP20 | 0.078807282  | 0.073961 | 0.108717 |
| RPL13AP3  | 0.051764682  | 0.240932 | 0.308031 |
| RPL13AP6  | 0.123958831  | 0.004846 | 0.009131 |
| RPL13A    | 0.056806476  | 0.198076 | 0.259821 |
| RPL13P5   | 0.026297008  | 0.551558 | 0.621591 |
| RPL13     | 0.069224641  | 0.116643 | 0.163107 |
| RPL14     | 0.130638224  | 0.002976 | 0.005817 |
| RPL15     | 0.026986478  | 0.541171 | 0.611886 |
| RPL17     | 0.133803044  | 0.002344 | 0.004667 |
| RPL18A    | 0.131358126  | 0.00282  | 0.005533 |
| RPL18     | 0.092840099  | 0.035178 | 0.055597 |
| RPL19P12  | 0.120107409  | 0.006354 | 0.011701 |
| RPL19     | 0.093623748  | 0.033656 | 0.053391 |
| RPL21P44  | -0.181136387 | 3.55E-05 | 9.72E-05 |
| RPL21     | 0.151280755  | 0.000572 | 0.001269 |
| RPL22L1   | 0.253239485  | 5.60E-09 | 2.78E-08 |
| RPL22     | 0.0776476    | 0.078326 | 0.11446  |
| RPL23AP32 | -0.148737865 | 0.000709 | 0.001551 |
| RPL23AP53 | -0.198103999 | 5.91E-06 | 1.83E-05 |
| RPL23AP64 | -0.259114882 | 2.40E-09 | 1.25E-08 |
| RPL23AP7  | 0.179601516  | 4.14E-05 | 0.000112 |
| RPL23AP82 | 0.050769409  | 0.25011  | 0.318136 |
| RPL23A    | 0.206387858  | 2.32E-06 | 7.67E-06 |
| RPL23P8   | -0.000219134 | 0.996042 | 0.997339 |
| RPL23     | 0.089904747  | 0.041406 | 0.064497 |
| RPL24     | 0.100755105  | 0.02221  | 0.036679 |
| RPL26L1   | 0.211210078  | 1.32E-06 | 4.55E-06 |
| RPL26     | 0.133735517  | 0.002356 | 0.00469  |
| RPL27A    | 0.141677825  | 0.001266 | 0.002644 |
| RPL27     | 0.250894786  | 7.81E-09 | 3.80E-08 |
| RPL28     | -0.003649549 | 0.934153 | 0.948388 |
| RPL29P2   | 0.075174614  | 0.088334 | 0.127363 |
| RPL29     | 0.136397082  | 0.00192  | 0.00388  |
| RPL30     | 0.22803763   | 1.68E-07 | 6.67E-07 |
| RPL31P11  | 0.117005589  | 0.007861 | 0.014237 |
| RPL31     | 0.1588257    | 0.000296 | 0.000693 |

|         |              |          |          |
|---------|--------------|----------|----------|
| RPL32P3 | -0.30667033  | 1.12E-12 | 9.76E-12 |
| RPL32   | 0.126199397  | 0.004125 | 0.007859 |
| RPL34   | 0.028052266  | 0.525308 | 0.597329 |
| RPL35A  | 0.209429966  | 1.63E-06 | 5.53E-06 |
| RPL35   | 0.158223576  | 0.000313 | 0.000727 |
| RPL36AL | 0.295544218  | 7.69E-12 | 5.87E-11 |
| RPL36A  | 0.158886543  | 0.000295 | 0.000689 |
| RPL36   | 0.094975264  | 0.031164 | 0.049825 |
| RPL37A  | 0.141191695  | 0.001316 | 0.002739 |
| RPL37   | 0.10568033   | 0.016433 | 0.027873 |
| RPL38   | 0.185461682  | 2.28E-05 | 6.45E-05 |
| RPL39L  | 0.239862333  | 3.57E-08 | 1.57E-07 |
| RPL39   | 0.213173306  | 1.05E-06 | 3.67E-06 |
| RPL3L   | 0.042425787  | 0.336609 | 0.410553 |
| RPL3    | 0.0416868    | 0.3451   | 0.419298 |
| RPL41   | 0.205021812  | 2.71E-06 | 8.87E-06 |
| RPL4    | 0.193219844  | 1.01E-05 | 3.01E-05 |
| RPL5    | 0.157740749  | 0.000326 | 0.000757 |
| RPL6    | 0.224365881  | 2.67E-07 | 1.03E-06 |
| RPL7A   | 0.16019917   | 0.000262 | 0.000619 |
| RPL7L1  | 0.338436178  | 2.88E-15 | 3.73E-14 |
| RPL7    | 0.222560854  | 3.35E-07 | 1.27E-06 |
| RPL8    | 0.246295174  | 1.49E-08 | 6.92E-08 |
| RPL9    | 0.132739568  | 0.002541 | 0.005029 |
| RPLP0P2 | 0.2489083    | 1.03E-08 | 4.94E-08 |
| RPLP0   | 0.338653104  | 2.76E-15 | 3.59E-14 |
| RPLP1   | 0.096950495  | 0.027807 | 0.044961 |
| RPLP2   | 0.086045217  | 0.050991 | 0.077868 |
| RPN1    | 0.260481359  | 1.96E-09 | 1.04E-08 |
| RPN2    | 0.256264409  | 3.63E-09 | 1.84E-08 |
| RPP14   | 0.19812177   | 5.89E-06 | 1.83E-05 |
| RPP21   | 0.102350047  | 0.020171 | 0.033584 |
| RPP25   | 0.223269246  | 3.07E-07 | 1.17E-06 |
| RPP30   | 0.31246235   | 3.98E-13 | 3.70E-12 |
| RPP38   | 0.250516981  | 8.24E-09 | 3.99E-08 |
| RPP40   | 0.367813738  | 6.07E-18 | 1.18E-16 |
| RPPH1   | 0.063281172  | 0.151565 | 0.205709 |
| RPRD1A  | 0.215069811  | 8.37E-07 | 2.97E-06 |
| RPRD1B  | 0.180083354  | 3.95E-05 | 0.000107 |
| RPRD2   | -0.106548734 | 0.015564 | 0.026523 |
| RPRML   | -0.09240546  | 0.036046 | 0.056848 |
| RPRM    | -0.06114089  | 0.16592  | 0.222772 |
| RPS10P7 | -0.223229375 | 3.08E-07 | 1.18E-06 |
| RPS10   | 0.24269779   | 2.43E-08 | 1.10E-07 |

|           |              |          |          |
|-----------|--------------|----------|----------|
| RPS11     | 0.100223689  | 0.022927 | 0.037746 |
| RPS12     | 0.113471426  | 0.009962 | 0.017698 |
| RPS13     | 0.117220109  | 0.007748 | 0.014045 |
| RPS14     | 0.077155542  | 0.080241 | 0.116975 |
| RPS15AP10 | -0.288442324 | 2.52E-11 | 1.77E-10 |
| RPS15A    | 0.159555508  | 0.000278 | 0.000653 |
| RPS15     | 0.057077488  | 0.195941 | 0.257392 |
| RPS16     | 0.231190577  | 1.12E-07 | 4.58E-07 |
| RPS17     | 0.201683225  | 3.96E-06 | 1.26E-05 |
| RPS18     | 0.217202498  | 6.47E-07 | 2.34E-06 |
| RPS19BP1  | 0.048199039  | 0.274927 | 0.345243 |
| RPS19     | 0.176116649  | 5.86E-05 | 0.000154 |
| RPS20     | 0.083187822  | 0.059225 | 0.089061 |
| RPS21     | 0.186674859  | 2.01E-05 | 5.75E-05 |
| RPS23     | 0.069035148  | 0.117649 | 0.164296 |
| RPS24     | 0.151454584  | 0.000563 | 0.001252 |
| RPS25     | 0.126056506  | 0.004168 | 0.007933 |
| RPS26P11  | 0.163348937  | 0.000197 | 0.000477 |
| RPS26     | 0.288423686  | 2.53E-11 | 1.77E-10 |
| RPS27A    | 0.230656442  | 1.20E-07 | 4.89E-07 |
| RPS27L    | -0.02180735  | 0.621487 | 0.684688 |
| RPS27     | 0.034137641  | 0.439493 | 0.513839 |
| RPS28     | -0.120869902 | 0.006026 | 0.011147 |
| RPS29     | 0.29627665   | 6.79E-12 | 5.22E-11 |
| RPS2P32   | 0.030878821  | 0.484417 | 0.558135 |
| RPS2      | 0.149985587  | 0.000638 | 0.001405 |
| RPS3A     | 0.157726694  | 0.000327 | 0.000757 |
| RPS3      | 0.241393231  | 2.91E-08 | 1.29E-07 |
| RPS4X     | 0.036725979  | 0.405578 | 0.48034  |
| RPS4Y1    | 0.173027875  | 7.92E-05 | 0.000204 |
| RPS4Y2    | 0.043792944  | 0.321256 | 0.39416  |
| RPS5      | 0.157494749  | 0.000333 | 0.000771 |
| RPS6KA1   | -0.389124452 | 4.59E-20 | 1.20E-18 |
| RPS6KA2   | -0.355144028 | 9.38E-17 | 1.49E-15 |
| RPS6KA3   | -0.186620043 | 2.02E-05 | 5.78E-05 |
| RPS6KA4   | 0.035251888  | 0.424698 | 0.499316 |
| RPS6KA5   | -0.216110948 | 7.38E-07 | 2.65E-06 |
| RPS6KA6   | -0.061083215 | 0.166321 | 0.223186 |
| RPS6KB1   | 0.153698964  | 0.000465 | 0.001048 |
| RPS6KB2   | 0.153130709  | 0.000488 | 0.001096 |
| RPS6KC1   | 0.208335282  | 1.85E-06 | 6.24E-06 |
| RPS6KL1   | -0.08106035  | 0.066047 | 0.098276 |
| RPS6      | 0.134611182  | 0.002204 | 0.00441  |
| RPS7      | 0.266865978  | 7.58E-10 | 4.29E-09 |

|         |              |          |          |
|---------|--------------|----------|----------|
| RPS8    | 0.119176197  | 0.006777 | 0.012421 |
| RPS9    | 0.012885077  | 0.770508 | 0.815381 |
| RPSAP52 | 0.149863886  | 0.000645 | 0.001419 |
| RPSAP58 | 0.200846755  | 4.35E-06 | 1.38E-05 |
| RPSAP9  | 0.178488599  | 4.63E-05 | 0.000124 |
| RPSA    | 0.197786433  | 6.12E-06 | 1.89E-05 |
| RPTN    | -0.000404917 | 0.992686 | 0.994633 |
| RPTOR   | -0.014329004 | 0.745633 | 0.794441 |
| RPUSD1  | 0.12251882   | 0.005367 | 0.01003  |
| RPUSD2  | 0.134184962  | 0.002277 | 0.004544 |
| RPUSD3  | 0.140543459  | 0.001386 | 0.002874 |
| RPUSD4  | 0.163771835  | 0.000189 | 0.00046  |
| RQCD1   | 0.273253553  | 2.85E-10 | 1.72E-09 |
| RRAD    | -0.309870057 | 6.35E-13 | 5.74E-12 |
| RRAGA   | 0.086266082  | 0.050397 | 0.077096 |
| RRAGB   | -0.087383706 | 0.047476 | 0.072929 |
| RRAGC   | 0.038920906  | 0.378078 | 0.452841 |
| RRAGD   | -0.17913168  | 4.34E-05 | 0.000117 |
| RRAS2   | 0.007039415  | 0.873382 | 0.901201 |
| RRAS    | -0.128377702 | 0.003519 | 0.006784 |
| RRBP1   | -0.181055371 | 3.58E-05 | 9.80E-05 |
| RREB1   | -0.004634514 | 0.91644  | 0.93463  |
| RRH     | -0.067849201 | 0.124104 | 0.172215 |
| RRM1    | 0.32502623   | 3.90E-14 | 4.22E-13 |
| RRM2B   | -0.225413818 | 2.34E-07 | 9.10E-07 |
| RRM2    | 0.508480491  | 3.26E-35 | 9.88E-33 |
| RRN3P1  | -0.282294804 | 6.85E-11 | 4.52E-10 |
| RRN3P2  | -0.228031802 | 1.68E-07 | 6.68E-07 |
| RRN3P3  | -0.298855134 | 4.38E-12 | 3.44E-11 |
| RRN3    | 0.047400103  | 0.282971 | 0.353745 |
| RRP12   | 0.199124281  | 5.27E-06 | 1.65E-05 |
| RRP15   | 0.210948781  | 1.37E-06 | 4.69E-06 |
| RRP1B   | 0.181638186  | 3.38E-05 | 9.27E-05 |
| RRP1    | 0.092262711  | 0.036336 | 0.057267 |
| RRP7A   | 0.114239317  | 0.009467 | 0.016881 |
| RRP7B   | -0.169179016 | 0.000114 | 0.000288 |
| RRP8    | 0.05192018   | 0.23952  | 0.306402 |
| RRP9    | 0.194748069  | 8.53E-06 | 2.58E-05 |
| RRS1    | 0.358398698  | 4.70E-17 | 7.89E-16 |
| RS1     | -0.336402725 | 4.31E-15 | 5.42E-14 |
| RSAD1   | -0.214910727 | 8.53E-07 | 3.03E-06 |
| RSAD2   | -0.137888803 | 0.001709 | 0.003487 |
| RSBN1L  | -0.078704256 | 0.07434  | 0.109226 |
| RSBN1   | -0.178467578 | 4.64E-05 | 0.000125 |

|          |              |          |          |
|----------|--------------|----------|----------|
| RSC1A1   | -0.034684641 | 0.432194 | 0.506906 |
| RSF1     | 0.002221798  | 0.959885 | 0.969244 |
| RSL1D1   | 0.239167055  | 3.92E-08 | 1.71E-07 |
| RSL24D1  | 0.275668748  | 1.96E-10 | 1.21E-09 |
| RSPH10B2 | -0.236129629 | 5.88E-08 | 2.50E-07 |
| RSPH1    | -0.312278053 | 4.12E-13 | 3.82E-12 |
| RSPH3    | -0.066821493 | 0.129917 | 0.17946  |
| RSPH4A   | -0.243216353 | 2.27E-08 | 1.03E-07 |
| RSPH6A   | 0.083763567  | 0.057483 | 0.086702 |
| RSPH9    | -0.142187395 | 0.001215 | 0.002546 |
| RSPO1    | -0.396580859 | 7.62E-21 | 2.26E-19 |
| RSPO2    | -0.363814275 | 1.46E-17 | 2.65E-16 |
| RSPO3    | 0.232964131  | 8.91E-08 | 3.70E-07 |
| RSPO4    | -0.270276896 | 4.52E-10 | 2.64E-09 |
| RSPRY1   | 0.121813752  | 0.00564  | 0.010495 |
| RSRC1    | 0.35405303   | 1.18E-16 | 1.85E-15 |
| RSRC2    | 0.01175851   | 0.790082 | 0.831517 |
| RSU1     | -0.019404262 | 0.660427 | 0.71947  |
| RTBDN    | 0.037164916  | 0.399985 | 0.47456  |
| RTCD1    | 0.277396508  | 1.49E-10 | 9.38E-10 |
| RTDR1    | -0.155695794 | 0.000391 | 0.000892 |
| RTEL1    | -0.154108083 | 0.000449 | 0.001015 |
| RTF1     | -0.002655026 | 0.952071 | 0.962862 |
| RTKN2    | -0.020479323 | 0.642885 | 0.703607 |
| RTKN     | 0.207872804  | 1.96E-06 | 6.55E-06 |
| RTL1     | 0.145643733  | 0.000917 | 0.001961 |
| RTN1     | -0.354151528 | 1.16E-16 | 1.82E-15 |
| RTN2     | -0.091849213 | 0.037185 | 0.05844  |
| RTN3     | 0.065285146  | 0.138998 | 0.190646 |
| RTN4IP1  | 0.098522363  | 0.025362 | 0.041353 |
| RTN4RL1  | -0.389009253 | 4.72E-20 | 1.24E-18 |
| RTN4RL2  | -0.083634404 | 0.05787  | 0.087213 |
| RTN4R    | -0.229024507 | 1.48E-07 | 5.93E-07 |
| RTN4     | 0.186384569  | 2.07E-05 | 5.91E-05 |
| RTP1     | -0.134974123 | 0.002143 | 0.004301 |
| RTP2     | -0.086928946 | 0.048647 | 0.074602 |
| RTP3     | 0.102655538  | 0.0198   | 0.033032 |
| RTP4     | -0.133861381 | 0.002334 | 0.004648 |
| RTTN     | 0.067799882  | 0.124378 | 0.1725   |
| RUFY1    | -0.197310133 | 6.45E-06 | 1.99E-05 |
| RUFY2    | -0.02391739  | 0.588142 | 0.654517 |
| RUFY3    | -0.292201722 | 1.35E-11 | 9.92E-11 |
| RUFY4    | -0.280449916 | 9.21E-11 | 5.96E-10 |
| RUNDC1   | -0.045736063 | 0.300232 | 0.371742 |

|         |              |          |          |
|---------|--------------|----------|----------|
| RUNDC2A | -0.14955745  | 0.000662 | 0.001455 |
| RUNDC2C | -0.372663762 | 2.06E-18 | 4.24E-17 |
| RUNDC3A | 0.060019742  | 0.173836 | 0.232137 |
| RUNDC3B | -0.100522605 | 0.022521 | 0.037126 |
| RUNX1T1 | -0.236401422 | 5.67E-08 | 2.42E-07 |
| RUNX1   | -0.271766305 | 3.59E-10 | 2.13E-09 |
| RUNX2   | 0.070331072  | 0.1109   | 0.155894 |
| RUNX3   | -0.247293309 | 1.29E-08 | 6.08E-08 |
| RUSC1   | 0.050523025  | 0.252418 | 0.320606 |
| RUSC2   | -0.123727752 | 0.004926 | 0.009264 |
| RUVBL1  | 0.407929961  | 4.54E-22 | 1.61E-20 |
| RUVBL2  | 0.240425768  | 3.31E-08 | 1.47E-07 |
| RWDD1   | 0.109663727  | 0.01277  | 0.02215  |
| RWDD2A  | 0.113159003  | 0.01017  | 0.018032 |
| RWDD2B  | 0.025320927  | 0.566429 | 0.635092 |
| RWDD3   | 0.015739002  | 0.721594 | 0.77382  |
| RWDD4A  | 0.228732254  | 1.54E-07 | 6.14E-07 |
| RXFP1   | -0.275136328 | 2.13E-10 | 1.31E-09 |
| RXFP2   | -0.169362224 | 0.000112 | 0.000284 |
| RXFP3   | 0.011427018  | 0.795868 | 0.836504 |
| RXFP4   | -0.201909602 | 3.86E-06 | 1.23E-05 |
| RXRA    | -0.345943106 | 6.34E-16 | 9.03E-15 |
| RXRB    | -0.164967291 | 0.00017  | 0.000416 |
| RXRG    | -0.349391308 | 3.12E-16 | 4.66E-15 |
| RYBP    | -0.022720309 | 0.606959 | 0.671532 |
| RYK     | 0.055816248  | 0.206022 | 0.268968 |
| RYR1    | -0.305114448 | 1.48E-12 | 1.26E-11 |
| RYR2    | -0.293448438 | 1.10E-11 | 8.14E-11 |
| RYR3    | -0.186667467 | 2.01E-05 | 5.75E-05 |
| S100A10 | 0.093949396  | 0.033041 | 0.052493 |
| S100A11 | 0.107255949  | 0.014886 | 0.025514 |
| S100A12 | 0.152832421  | 0.000501 | 0.001122 |
| S100A13 | -0.049580231 | 0.26139  | 0.330278 |
| S100A14 | -0.007816334 | 0.859546 | 0.889495 |
| S100A16 | 0.198079993  | 5.92E-06 | 1.84E-05 |
| S100A1  | -0.194585251 | 8.68E-06 | 2.62E-05 |
| S100A2  | 0.082425936  | 0.061598 | 0.092337 |
| S100A3  | 0.018403649  | 0.676923 | 0.734386 |
| S100A4  | -0.032854172 | 0.456895 | 0.530986 |
| S100A5  | 0.057559098  | 0.192189 | 0.253111 |
| S100A6  | 0.024857937  | 0.573549 | 0.641456 |
| S100A7A | 0.077315855  | 0.079613 | 0.11617  |
| S100A7  | 0.138929455  | 0.001575 | 0.00323  |
| S100A8  | 0.116403725  | 0.008189 | 0.01478  |

|         |              |          |          |
|---------|--------------|----------|----------|
| S100A9  | 0.106624687  | 0.01549  | 0.02641  |
| S100B   | -0.248884423 | 1.04E-08 | 4.95E-08 |
| S100G   | 0.033486864  | 0.448269 | 0.52248  |
| S100PBP | -0.182694292 | 3.03E-05 | 8.39E-05 |
| S100P   | 0.275945857  | 1.88E-10 | 1.16E-09 |
| S100Z   | -0.301924869 | 2.58E-12 | 2.10E-11 |
| S1PR1   | -0.22833245  | 1.62E-07 | 6.44E-07 |
| S1PR2   | -0.214674814 | 8.77E-07 | 3.11E-06 |
| S1PR3   | 0.143787993  | 0.001067 | 0.002258 |
| S1PR4   | -0.290615034 | 1.76E-11 | 1.27E-10 |
| S1PR5   | -0.024843805 | 0.573767 | 0.641628 |
| SAA1    | 0.123490078  | 0.00501  | 0.009412 |
| SAA2    | 0.11446966   | 0.009323 | 0.01664  |
| SAA3P   | -0.03231557  | 0.464311 | 0.538196 |
| SAA4    | 0.058989581  | 0.181354 | 0.240713 |
| SAAL1   | 0.291342713  | 1.56E-11 | 1.13E-10 |
| SAC3D1  | 0.220295017  | 4.43E-07 | 1.65E-06 |
| SACM1L  | -0.180791848 | 3.68E-05 | 0.0001   |
| SACS    | 0.211775406  | 1.24E-06 | 4.27E-06 |
| SAE1    | 0.261996917  | 1.57E-09 | 8.46E-09 |
| SAFB2   | -0.203301534 | 3.30E-06 | 1.06E-05 |
| SAFB    | -0.096255483 | 0.028951 | 0.046634 |
| SAGE1   | 0.021040284  | 0.633809 | 0.695388 |
| SAG     | 0.017873312  | 0.68573  | 0.74253  |
| SALL1   | -0.055059426 | 0.212248 | 0.275965 |
| SALL2   | -0.241687095 | 2.79E-08 | 1.25E-07 |
| SALL3   | 0.075106908  | 0.088622 | 0.127704 |
| SALL4   | -0.026740591 | 0.544864 | 0.615512 |
| SAMD10  | -0.115874798 | 0.008486 | 0.015256 |
| SAMD11  | -0.196194273 | 7.28E-06 | 2.22E-05 |
| SAMD12  | -0.280271713 | 9.47E-11 | 6.13E-10 |
| SAMD13  | 0.091794262  | 0.037299 | 0.058601 |
| SAMD14  | -0.128238338 | 0.003555 | 0.006846 |
| SAMD1   | 0.173171684  | 7.81E-05 | 0.000202 |
| SAMD3   | -0.179370593 | 4.24E-05 | 0.000115 |
| SAMD4A  | -0.084237348 | 0.056082 | 0.084838 |
| SAMD4B  | 0.024563043  | 0.578106 | 0.645469 |
| SAMD5   | -0.123415966 | 0.005037 | 0.009458 |
| SAMD7   | 0.04471888   | 0.31112  | 0.383136 |
| SAMD8   | 0.224883115  | 2.51E-07 | 9.69E-07 |
| SAMD9L  | -0.134334597 | 0.002251 | 0.004496 |
| SAMD9   | -0.072888931 | 0.098475 | 0.140334 |
| SAMHD1  | -0.145863538 | 0.0009   | 0.001929 |
| SAMM50  | 0.076691642  | 0.08208  | 0.1193   |



|         |              |          |          |
|---------|--------------|----------|----------|
| SAMSN1  | -0.068230209 | 0.122001 | 0.16978  |
| SAP130  | 0.053854599  | 0.222438 | 0.287308 |
| SAP18   | 0.145054344  | 0.000962 | 0.002053 |
| SAP30BP | -0.064608707 | 0.143147 | 0.195706 |
| SAP30L  | -0.320951955 | 8.38E-14 | 8.56E-13 |
| SAP30   | 0.197674229  | 6.19E-06 | 1.91E-05 |
| SAPS1   | -0.039428586 | 0.371884 | 0.446777 |
| SAPS2   | -0.365024773 | 1.12E-17 | 2.07E-16 |
| SAPS3   | 0.209108227  | 1.69E-06 | 5.73E-06 |
| SAR1A   | 0.180755696  | 3.69E-05 | 0.000101 |
| SAR1B   | 0.185348774  | 2.31E-05 | 6.52E-05 |
| SARDH   | -0.230275096 | 1.26E-07 | 5.12E-07 |
| SARM1   | -0.448915253 | 6.63E-27 | 4.78E-25 |
| SARNP   | 0.315466809  | 2.31E-13 | 2.22E-12 |
| SARS2   | 0.077626733  | 0.078407 | 0.114561 |
| SARS    | 0.003920475  | 0.929278 | 0.944637 |
| SART1   | -0.012658354 | 0.774436 | 0.818801 |
| SART3   | 0.126118788  | 0.004149 | 0.0079   |
| SASH1   | -0.259067592 | 2.42E-09 | 1.26E-08 |
| SASH3   | -0.223808507 | 2.87E-07 | 1.10E-06 |
| SASS6   | 0.345011097  | 7.67E-16 | 1.08E-14 |
| SAT1    | -0.084365521 | 0.055707 | 0.084303 |
| SAT2    | -0.060102867 | 0.173239 | 0.231418 |
| SATB1   | -0.335103449 | 5.57E-15 | 6.88E-14 |
| SATB2   | -0.00457852  | 0.917446 | 0.935196 |
| SATL1   | 0.022879905  | 0.604435 | 0.669332 |
| SAV1    | 0.258295967  | 2.70E-09 | 1.40E-08 |
| SBDSP1  | 0.08557577   | 0.052275 | 0.079627 |
| SBDS    | 0.060724719  | 0.168826 | 0.226219 |
| SBF1P1  | -0.026469047 | 0.548957 | 0.619219 |
| SBF1    | -0.224738006 | 2.55E-07 | 9.85E-07 |
| SBF2    | 0.034070722  | 0.440391 | 0.514708 |
| SBK1    | -0.18524426  | 2.33E-05 | 6.58E-05 |
| SBK2    | 0.112052429  | 0.010937 | 0.019259 |
| SBNO1   | 0.212833255  | 1.09E-06 | 3.81E-06 |
| SBNO2   | -0.048278245 | 0.274138 | 0.344447 |
| SBSN    | 0.226358664  | 2.08E-07 | 8.15E-07 |
| SC4MOL  | 0.170815086  | 9.79E-05 | 0.00025  |
| SC5DL   | 0.002964058  | 0.946501 | 0.95781  |
| SC65    | 0.298462551  | 4.68E-12 | 3.66E-11 |
| SCAF1   | -0.079255738 | 0.072327 | 0.106597 |
| SCAI    | -0.348444142 | 3.80E-16 | 5.59E-15 |
| SCAMP1  | 0.187095245  | 1.93E-05 | 5.52E-05 |
| SCAMP2  | -0.260268024 | 2.03E-09 | 1.07E-08 |

|          |              |          |          |
|----------|--------------|----------|----------|
| SCAMP3   | 0.015866665  | 0.719431 | 0.771914 |
| SCAMP4   | -0.195100432 | 8.21E-06 | 2.49E-05 |
| SCAMP5   | -0.042498214 | 0.335784 | 0.409671 |
| SCAND1   | 0.019568434  | 0.657735 | 0.716995 |
| SCAND2   | -0.274203507 | 2.46E-10 | 1.50E-09 |
| SCAND3   | -0.104207953 | 0.018003 | 0.030293 |
| SCAPER   | -0.307189506 | 1.02E-12 | 8.95E-12 |
| SCAP     | -0.145221129 | 0.000949 | 0.002026 |
| SCARA3   | -0.324290582 | 4.48E-14 | 4.78E-13 |
| SCARA5   | -0.20309198  | 3.38E-06 | 1.09E-05 |
| SCARB1   | 0.202638011  | 3.56E-06 | 1.14E-05 |
| SCARB2   | -0.016196709 | 0.713848 | 0.767366 |
| SCARF1   | -0.40152664  | 2.26E-21 | 7.31E-20 |
| SCARF2   | -0.165500829 | 0.000161 | 0.000397 |
| SCARNA10 | 0.026174318  | 0.553417 | 0.623159 |
| SCARNA11 | -0.0356882   | 0.418985 | 0.493691 |
| SCARNA12 | 0.110094242  | 0.01242  | 0.021597 |
| SCARNA15 | -0.009033871 | 0.837949 | 0.871115 |
| SCARNA16 | -0.015076753 | 0.732852 | 0.783706 |
| SCARNA17 | -0.0943929   | 0.032218 | 0.051337 |
| SCARNA18 | 0.085139714  | 0.05349  | 0.081312 |
| SCARNA1  | -0.010196721 | 0.817436 | 0.854367 |
| SCARNA20 | 0.079131371  | 0.072777 | 0.107142 |
| SCARNA21 | 0.030924746  | 0.483767 | 0.557483 |
| SCARNA22 | -0.038480019 | 0.383508 | 0.458082 |
| SCARNA2  | -0.06276234  | 0.154955 | 0.20967  |
| SCARNA3  | 0.104214046  | 0.017996 | 0.030284 |
| SCARNA4  | -0.092189703 | 0.036484 | 0.057444 |
| SCARNA5  | -0.042108887 | 0.340234 | 0.414392 |
| SCARNA6  | -0.065999031 | 0.134719 | 0.18544  |
| SCARNA7  | -0.187073987 | 1.93E-05 | 5.53E-05 |
| SCARNA9L | 0.041212983  | 0.350616 | 0.425172 |
| SCARNA9  | -0.103758901 | 0.018508 | 0.03106  |
| SCCPDH   | 0.201396772  | 4.09E-06 | 1.30E-05 |
| SCD5     | -0.261428438 | 1.71E-09 | 9.13E-09 |
| SCD      | 0.238040109  | 4.56E-08 | 1.97E-07 |
| SCEL     | -0.078257138 | 0.076006 | 0.11151  |
| SCFD1    | 0.373042128  | 1.89E-18 | 3.91E-17 |
| SCFD2    | 0.075209147  | 0.088188 | 0.12716  |
| SCG2     | 0.064975849  | 0.140883 | 0.192888 |
| SCG3     | 0.116374344  | 0.008205 | 0.014808 |
| SCG5     | 0.157069416  | 0.000346 | 0.000799 |
| SCGB1A1  | -0.280287467 | 9.45E-11 | 6.11E-10 |
| SCGB1C1  | 0.052720094  | 0.232348 | 0.298507 |

|         |              |          |          |
|---------|--------------|----------|----------|
| SCGB1D1 | -0.012821352 | 0.771611 | 0.816289 |
| SCGB1D2 | -0.036541469 | 0.407943 | 0.482683 |
| SCGB2A1 | -0.278874376 | 1.18E-10 | 7.53E-10 |
| SCGB2A2 | 0.015251346  | 0.729878 | 0.781111 |
| SCGB3A1 | -0.420442817 | 1.78E-23 | 7.81E-22 |
| SCGB3A2 | -0.305299454 | 1.43E-12 | 1.22E-11 |
| SCGBL   | -0.234917833 | 6.90E-08 | 2.91E-07 |
| SCGN    | -0.063212691 | 0.152009 | 0.206172 |
| SCHIP1  | 0.155588844  | 0.000394 | 0.0009   |
| SCIN    | -0.072267734 | 0.101386 | 0.144009 |
| SCLT1   | 0.228969052  | 1.49E-07 | 5.97E-07 |
| SCLY    | 0.034349115  | 0.436663 | 0.511051 |
| SCMH1   | -0.276060127 | 1.84E-10 | 1.14E-09 |
| SCML1   | -0.085010389 | 0.053856 | 0.081823 |
| SCML2   | 0.239192198  | 3.91E-08 | 1.71E-07 |
| SCML4   | -0.266258562 | 8.31E-10 | 4.68E-09 |
| SCN10A  | -0.191265597 | 1.24E-05 | 3.66E-05 |
| SCN11A  | -0.398063658 | 5.31E-21 | 1.61E-19 |
| SCN1A   | -0.365702472 | 9.67E-18 | 1.82E-16 |
| SCN1B   | -0.093995939 | 0.032954 | 0.052376 |
| SCN2A   | -0.044270609 | 0.316001 | 0.38838  |
| SCN2B   | -0.351043127 | 2.22E-16 | 3.35E-15 |
| SCN3A   | 0.085715748  | 0.051889 | 0.079088 |
| SCN3B   | -0.100790175 | 0.022163 | 0.036605 |
| SCN4A   | 0.062931153  | 0.153846 | 0.208403 |
| SCN4B   | -0.463987598 | 7.43E-29 | 6.90E-27 |
| SCN5A   | -0.111248282 | 0.011526 | 0.020193 |
| SCN7A   | -0.367650159 | 6.30E-18 | 1.21E-16 |
| SCN8A   | 0.022870399  | 0.604585 | 0.669422 |
| SCN9A   | -0.004596958 | 0.917115 | 0.935079 |
| SCNM1   | 0.214311373  | 9.16E-07 | 3.24E-06 |
| SCNN1A  | -0.055771136 | 0.206389 | 0.269364 |
| SCNN1B  | -0.359159489 | 3.99E-17 | 6.79E-16 |
| SCNN1D  | -0.294067374 | 9.87E-12 | 7.39E-11 |
| SCNN1G  | -0.185643261 | 2.24E-05 | 6.34E-05 |
| SCO1    | 0.366818516  | 7.56E-18 | 1.44E-16 |
| SCO2    | -0.026334558 | 0.55099  | 0.621161 |
| SCOC    | 0.226493921  | 2.05E-07 | 8.03E-07 |
| SCP2    | -0.201641836 | 3.98E-06 | 1.27E-05 |
| SCPEP1  | -0.272427122 | 3.24E-10 | 1.93E-09 |
| SCRG1   | -0.162364175 | 0.000215 | 0.000518 |
| SCRIB   | 0.064131884  | 0.146128 | 0.199223 |
| SCRN1   | -0.079776195 | 0.070467 | 0.104133 |
| SCRN2   | -0.28417751  | 5.06E-11 | 3.39E-10 |

|         |              |          |          |
|---------|--------------|----------|----------|
| SCRN3   | -0.047619394 | 0.280747 | 0.351404 |
| SCRT1   | -0.029236885 | 0.507959 | 0.580474 |
| SCRT2   | 0.049222595  | 0.26485  | 0.334164 |
| SCTR    | -0.428757739 | 1.91E-24 | 9.81E-23 |
| SCT     | 0.012738668  | 0.773044 | 0.817545 |
| SCUBE1  | -0.240139937 | 3.44E-08 | 1.52E-07 |
| SCUBE2  | -0.271245032 | 3.89E-10 | 2.30E-09 |
| SCUBE3  | -0.13041063  | 0.003027 | 0.005906 |
| SCXB    | -0.065335786 | 0.138691 | 0.190278 |
| SCYL1   | 0.026284389  | 0.551749 | 0.621666 |
| SCYL2   | 0.281086746  | 8.32E-11 | 5.42E-10 |
| SCYL3   | -0.153303428 | 0.000481 | 0.001081 |
| SDAD1   | 0.277815278  | 1.40E-10 | 8.82E-10 |
| SDC1    | -0.318458825 | 1.33E-13 | 1.33E-12 |
| SDC2    | -0.088164299 | 0.045522 | 0.07024  |
| SDC3    | -0.26491493  | 1.02E-09 | 5.65E-09 |
| SDC4P   | -0.166407914 | 0.000148 | 0.000367 |
| SDC4    | -0.228739987 | 1.54E-07 | 6.14E-07 |
| SDCBP2  | 0.101381825  | 0.021388 | 0.035442 |
| SDCBP   | 0.025533345  | 0.563176 | 0.632332 |
| SDCCAG1 | 0.139211493  | 0.00154  | 0.003167 |
| SDCCAG3 | 0.226751313  | 1.98E-07 | 7.78E-07 |
| SDCCAG8 | -0.155979795 | 0.000381 | 0.000871 |
| SDF2L1  | 0.183452909  | 2.81E-05 | 7.81E-05 |
| SDF2    | 0.08958934   | 0.042128 | 0.065484 |
| SDF4    | -0.055026776 | 0.21252  | 0.276265 |
| SDHAF1  | 0.026365348  | 0.550524 | 0.620741 |
| SDHAF2  | 0.221997909  | 3.59E-07 | 1.36E-06 |
| SDHAP1  | -0.231614967 | 1.06E-07 | 4.36E-07 |
| SDHAP2  | -0.183557212 | 2.78E-05 | 7.74E-05 |
| SDHAP3  | -0.328249271 | 2.11E-14 | 2.37E-13 |
| SDHA    | 0.087459107  | 0.047285 | 0.072685 |
| SDHB    | 0.215823027  | 7.64E-07 | 2.73E-06 |
| SDHC    | 0.239051602  | 3.98E-08 | 1.74E-07 |
| SDHD    | 0.145703802  | 0.000912 | 0.001953 |
| SDK1    | -0.130529559 | 0.003    | 0.005858 |
| SDK2    | -0.303475349 | 1.97E-12 | 1.64E-11 |
| SDPR    | -0.366334624 | 8.41E-18 | 1.59E-16 |
| SDR16C5 | -0.128035225 | 0.003608 | 0.00694  |
| SDR39U1 | -0.133832592 | 0.002339 | 0.004657 |
| SDR42E1 | -0.161535255 | 0.000232 | 0.000555 |
| SDR9C7  | 0.054703879  | 0.21522  | 0.279374 |
| SDSL    | 0.08244993   | 0.061522 | 0.09224  |
| SDS     | 0.10395755   | 0.018283 | 0.03072  |

|           |              |          |          |
|-----------|--------------|----------|----------|
| SEBOX     | -0.074298764 | 0.092116 | 0.132082 |
| SEC11A    | 0.177189892  | 5.27E-05 | 0.00014  |
| SEC11C    | 0.050347438  | 0.254073 | 0.322603 |
| SEC13     | 0.253851633  | 5.13E-09 | 2.56E-08 |
| SEC14L1   | -0.164107044 | 0.000184 | 0.000447 |
| SEC14L2   | 0.067952427  | 0.123531 | 0.171552 |
| SEC14L3   | -0.337893474 | 3.21E-15 | 4.13E-14 |
| SEC14L4   | -0.245426756 | 1.67E-08 | 7.75E-08 |
| SEC14L5   | -0.241598244 | 2.83E-08 | 1.26E-07 |
| SEC16A    | -0.040459451 | 0.359502 | 0.434182 |
| SEC16B    | -0.122403512 | 0.005411 | 0.010103 |
| SEC1      | -0.168362464 | 0.000124 | 0.00031  |
| SEC22A    | 0.100676627  | 0.022314 | 0.036822 |
| SEC22B    | 0.1475195    | 0.000785 | 0.001702 |
| SEC22C    | -0.050442413 | 0.253177 | 0.321526 |
| SEC23A    | 0.394244561  | 1.34E-20 | 3.80E-19 |
| SEC23B    | 0.140655549  | 0.001374 | 0.00285  |
| SEC23IP   | 0.24852888   | 1.09E-08 | 5.18E-08 |
| SEC24A    | 0.249565546  | 9.42E-09 | 4.53E-08 |
| SEC24B    | 0.0643023    | 0.145057 | 0.197993 |
| SEC24C    | -0.047107166 | 0.28596  | 0.356945 |
| SEC24D    | 0.159237777  | 0.000286 | 0.00067  |
| SEC31A    | 0.054571265  | 0.216335 | 0.280677 |
| SEC31B    | -0.399239396 | 3.97E-21 | 1.24E-19 |
| SEC61A1   | 0.195605367  | 7.77E-06 | 2.36E-05 |
| SEC61A2   | 0.046199604  | 0.295355 | 0.366657 |
| SEC61B    | 0.240335074  | 3.35E-08 | 1.48E-07 |
| SEC61G    | 0.391072111  | 2.89E-20 | 7.86E-19 |
| SEC62     | -0.003642824 | 0.934274 | 0.948462 |
| SEC63     | -0.094568867 | 0.031897 | 0.050865 |
| SECISBP2L | -0.243091701 | 2.31E-08 | 1.04E-07 |
| SECISBP2  | -0.156691643 | 0.000358 | 0.000823 |
| SECTM1    | -0.046309111 | 0.29421  | 0.365532 |
| SEH1L     | 0.324894276  | 3.99E-14 | 4.32E-13 |
| SEL1L2    | -0.129088046 | 0.003339 | 0.006469 |
| SEL1L3    | -0.151993937 | 0.000538 | 0.001199 |
| SEL1L     | 0.137624106  | 0.001745 | 0.003553 |
| SELENBP1  | -0.441494567 | 5.58E-26 | 3.61E-24 |
| SELE      | -0.100656258 | 0.022342 | 0.036864 |
| SELK      | 0.077898459  | 0.077365 | 0.11322  |
| SELL      | -0.182429567 | 3.11E-05 | 8.60E-05 |
| SELM      | -0.026806294 | 0.543876 | 0.614597 |
| SELO      | -0.252818412 | 5.95E-09 | 2.94E-08 |
| SELPLG    | -0.247645788 | 1.23E-08 | 5.81E-08 |

|         |        |              |          |          |
|---------|--------|--------------|----------|----------|
| SELP    |        | -0.298310541 | 4.80E-12 | 3.75E-11 |
| SELS    |        | 0.228711834  | 1.54E-07 | 6.16E-07 |
| SELT    |        | 0.216518875  | 7.03E-07 | 2.53E-06 |
| SELV    |        | 0.128246992  | 0.003553 | 0.006842 |
| SEMA3A  |        | 0.186399648  | 2.07E-05 | 5.90E-05 |
| SEMA3B  |        | -0.164070955 | 0.000184 | 0.000449 |
| SEMA3C  |        | 0.053361035  | 0.226711 | 0.292129 |
| SEMA3D  |        | -0.077926576 | 0.077257 | 0.113097 |
| SEMA3E  |        | -0.05228728  | 0.23621  | 0.302884 |
| SEMA3F  |        | 0.068635512  | 0.119794 | 0.166965 |
| SEMA3G  |        | -0.218871381 | 5.28E-07 | 1.94E-06 |
| SEMA4A  |        | -0.378218799 | 5.85E-19 | 1.32E-17 |
| SEMA4B  |        | 0.202654657  | 3.55E-06 | 1.14E-05 |
| SEMA4C  |        | -0.105903231 | 0.016206 | 0.027509 |
| SEMA4D  |        | -0.234289176 | 7.49E-08 | 3.14E-07 |
| SEMA4F  |        | -0.141326932 | 0.001302 | 0.002713 |
| SEMA4G  |        | 0.046161355  | 0.295755 | 0.367063 |
| SEMA5A  |        | -0.181056012 | 3.58E-05 | 9.80E-05 |
| SEMA5B  |        | 0.082740585  | 0.060609 | 0.091004 |
| SEMA6A  |        | -0.166508743 | 0.000147 | 0.000364 |
| SEMA6B  |        | 0.065860652  | 0.135541 | 0.186403 |
| SEMA6C  |        | -0.218267646 | 5.68E-07 | 2.08E-06 |
| SEMA6D  |        | -0.304263839 | 1.71E-12 | 1.45E-11 |
| SEMA7A  |        | 0.107868999  | 0.01432  | 0.024611 |
| SEMG1   |        | 0.006583368  | 0.881523 | 0.907026 |
| SEMG2   |        | 0.073880755  | 0.093966 | 0.134484 |
| SENP1   |        | 0.294921514  | 8.55E-12 | 6.47E-11 |
| SENP2   |        | 0.116422774  | 0.008178 | 0.014764 |
| SENP3   |        | 0.225695306  | 2.26E-07 | 8.80E-07 |
| SENP5   |        | 0.09607359   | 0.029257 | 0.047081 |
| SENP6   |        | -0.091807971 | 0.03727  | 0.05857  |
| SENP7   |        | -0.266585756 | 7.91E-10 | 4.47E-09 |
| SENP8   |        | -0.145468413 | 0.00093  | 0.001988 |
|         | 15-Sep | 0.224445823  | 2.65E-07 | 1.02E-06 |
| SEPHS1  |        | 0.342618678  | 1.25E-15 | 1.70E-14 |
| SEPHS2  |        | 0.221935998  | 3.62E-07 | 1.36E-06 |
| SEPN1   |        | -0.31872829  | 1.27E-13 | 1.27E-12 |
| SEPP1   |        | -0.309041785 | 7.36E-13 | 6.59E-12 |
| SEPSECS |        | -0.186897203 | 1.97E-05 | 5.63E-05 |
|         | 10-Sep | 0.111991575  | 0.01098  | 0.01932  |
|         | 11-Sep | 0.10086212   | 0.022067 | 0.036453 |
|         | 12-Sep | -0.041167593 | 0.351147 | 0.425713 |
|         | 14-Sep | 0.092962711  | 0.034936 | 0.055241 |
|         | 1-Sep  | -0.242123667 | 2.63E-08 | 1.18E-07 |

|           |       |              |          |          |
|-----------|-------|--------------|----------|----------|
|           | 2-Sep | 0.230981012  | 1.15E-07 | 4.70E-07 |
|           | 3-Sep | -0.107196453 | 0.014942 | 0.025601 |
|           | 4-Sep | -0.404267458 | 1.14E-21 | 3.85E-20 |
|           | 5-Sep | -0.098149032 | 0.025926 | 0.042193 |
|           | 6-Sep | -0.20567164  | 2.52E-06 | 8.28E-06 |
| SEPT7L    |       | -0.070434597 | 0.110374 | 0.155221 |
| SEPT7P2   |       | -0.257024703 | 3.25E-09 | 1.66E-08 |
|           | 7-Sep | 0.17908003   | 4.37E-05 | 0.000118 |
|           | 8-Sep | -0.039270748 | 0.373803 | 0.448715 |
|           | 9-Sep | -0.10161776  | 0.021086 | 0.034985 |
| SEPW1     |       | -0.257353024 | 3.10E-09 | 1.59E-08 |
| SEPX1     |       | 0.236071306  | 5.92E-08 | 2.52E-07 |
| SERAC1    |       | -0.000605895 | 0.989056 | 0.991885 |
| SERBP1    |       | 0.320822903  | 8.58E-14 | 8.75E-13 |
| SERF1A    |       | 0.064173018  | 0.145869 | 0.198951 |
| SERF2     |       | 0.069554945  | 0.114904 | 0.161014 |
| SERGEF    |       | -0.139140902 | 0.001549 | 0.003183 |
| SERHL2    |       | -0.153632041 | 0.000467 | 0.001053 |
| SERHL     |       | -0.061782773 | 0.161512 | 0.217467 |
| SERINC1   |       | -0.205429848 | 2.59E-06 | 8.49E-06 |
| SERINC2   |       | -0.085754224 | 0.051784 | 0.078963 |
| SERINC3   |       | 0.087754287  | 0.04654  | 0.071673 |
| SERINC4   |       | -0.195781398 | 7.62E-06 | 2.32E-05 |
| SERINC5   |       | -0.174351297 | 6.96E-05 | 0.000182 |
| SERP1     |       | 0.08074492   | 0.067111 | 0.099696 |
| SERP2     |       | -0.224276788 | 2.70E-07 | 1.04E-06 |
| SERPINA10 |       | 0.02340908   | 0.596099 | 0.662009 |
| SERPINA11 |       | -0.004303154 | 0.922395 | 0.939265 |
| SERPINA12 |       | 0.045273267  | 0.305154 | 0.376926 |
| SERPINA13 |       | 0.05609202   | 0.203786 | 0.266402 |
| SERPINA1  |       | -0.112087881 | 0.010911 | 0.019221 |
| SERPINA3  |       | 0.121512022  | 0.005761 | 0.010697 |
| SERPINA4  |       | 0.080401563  | 0.068285 | 0.101252 |
| SERPINA5  |       | 0.103855924  | 0.018398 | 0.030887 |
| SERPINA6  |       | -0.086111923 | 0.050811 | 0.07764  |
| SERPINA7  |       | -0.040283908 | 0.361592 | 0.436285 |
| SERPINA9  |       | -0.135467164 | 0.002063 | 0.004154 |
| SERPINB10 |       | -0.221177047 | 3.98E-07 | 1.49E-06 |
| SERPINB11 |       | -0.060074618 | 0.173442 | 0.231673 |
| SERPINB12 |       | 0.089477022  | 0.042388 | 0.06581  |
| SERPINB13 |       | -0.049718351 | 0.260062 | 0.328891 |
| SERPINB1  |       | 0.104857228  | 0.017295 | 0.029175 |
| SERPINB2  |       | -0.032553116 | 0.461032 | 0.534923 |
| SERPINB3  |       | 0.1390429    | 0.001561 | 0.003205 |

|          |              |          |          |
|----------|--------------|----------|----------|
| SERPINB4 | 0.176384725  | 5.71E-05 | 0.000151 |
| SERPINB5 | 0.334902972  | 5.80E-15 | 7.14E-14 |
| SERPINB6 | -0.044941892 | 0.308711 | 0.380614 |
| SERPINB7 | 0.180842714  | 3.66E-05 | 9.99E-05 |
| SERPINB8 | 0.046425798  | 0.292994 | 0.364247 |
| SERPINB9 | -0.056115598 | 0.203596 | 0.266205 |
| SERPINC1 | -0.124214884 | 0.004758 | 0.008979 |
| SERPIND1 | -0.210240476 | 1.48E-06 | 5.06E-06 |
| SERPINE1 | 0.161420621  | 0.000235 | 0.00056  |
| SERPINE2 | 0.112808586  | 0.010407 | 0.018404 |
| SERPINE3 | -0.058958905 | 0.181581 | 0.240951 |
| SERPINF1 | 0.007072772  | 0.872788 | 0.900866 |
| SERPINF2 | -0.052007472 | 0.23873  | 0.305508 |
| SERPING1 | -0.200530496 | 4.51E-06 | 1.42E-05 |
| SERPINH1 | 0.100945736  | 0.021957 | 0.036292 |
| SERPINI1 | 0.0959482    | 0.02947  | 0.047396 |
| SERPINI2 | -0.27463672  | 2.30E-10 | 1.41E-09 |
| SERTAD1  | -0.003463942 | 0.937495 | 0.950782 |
| SERTAD2  | -0.112133405 | 0.010879 | 0.019169 |
| SERTAD3  | 0.066532785  | 0.131587 | 0.181466 |
| SERTAD4  | -0.232197049 | 9.84E-08 | 4.06E-07 |
| SESN1    | -0.37687949  | 7.94E-19 | 1.75E-17 |
| SESN2    | -0.207495991 | 2.04E-06 | 6.81E-06 |
| SESN3    | -0.171910361 | 8.82E-05 | 0.000226 |
| SESTD1   | -0.170099557 | 0.000105 | 0.000266 |
| SETBP1   | -0.201045158 | 4.26E-06 | 1.35E-05 |
| SETD1A   | -0.118631881 | 0.007035 | 0.012854 |
| SETD1B   | -0.167458569 | 0.000135 | 0.000335 |
| SETD2    | -0.173733752 | 7.39E-05 | 0.000192 |
| SETD3    | 0.033709855  | 0.445251 | 0.519537 |
| SETD4    | -0.255600599 | 3.99E-09 | 2.01E-08 |
| SETD5    | -0.048138368 | 0.275532 | 0.345916 |
| SETD6    | 0.024692256  | 0.576107 | 0.643668 |
| SETD7    | 0.07186677   | 0.1033   | 0.146282 |
| SETD8    | 0.213084098  | 1.06E-06 | 3.71E-06 |
| SETDB1   | 0.004140657  | 0.925317 | 0.94176  |
| SETDB2   | -0.421853844 | 1.22E-23 | 5.53E-22 |
| SETMAR   | -0.040909443 | 0.354178 | 0.428816 |
| SETX     | -0.18758907  | 1.83E-05 | 5.26E-05 |
| SET      | 0.322095579  | 6.77E-14 | 7.03E-13 |
| SEZ6L2   | -0.217067583 | 6.58E-07 | 2.38E-06 |
| SEZ6L    | -0.141622488 | 0.001271 | 0.002655 |
| SEZ6     | -0.068627605 | 0.119837 | 0.167013 |
| SF1      | -0.096379891 | 0.028744 | 0.046325 |



|           |              |          |          |
|-----------|--------------|----------|----------|
| SF3A1     | -0.108195685 | 0.014026 | 0.024156 |
| SF3A2     | -0.022582333 | 0.609145 | 0.673652 |
| SF3A3     | 0.132387148  | 0.00261  | 0.005152 |
| SF3B14    | 0.356961089  | 6.38E-17 | 1.05E-15 |
| SF3B1     | -0.100101901 | 0.023095 | 0.037996 |
| SF3B2     | 0.161470355  | 0.000234 | 0.000558 |
| SF3B3     | 0.145493735  | 0.000928 | 0.001985 |
| SF3B4     | 0.182960859  | 2.95E-05 | 8.19E-05 |
| SF3B5     | 0.12795951   | 0.003628 | 0.006974 |
| SF4       | -0.171770182 | 8.94E-05 | 0.000229 |
| SFI1      | -0.452767961 | 2.15E-27 | 1.65E-25 |
| SFMBT1    | 0.005032776  | 0.909289 | 0.928901 |
| SFMBT2    | -0.025049353 | 0.5706   | 0.63873  |
| SFN       | 0.093128108  | 0.034612 | 0.054767 |
| SFPQ      | 0.210697798  | 1.41E-06 | 4.82E-06 |
| SFRP1     | -0.033067059 | 0.453982 | 0.52803  |
| SFRP2     | 0.168800167  | 0.000119 | 0.000298 |
| SFRP4     | -0.046804406 | 0.289071 | 0.360132 |
| SFRP5     | -0.197570008 | 6.26E-06 | 1.93E-05 |
| SFRS11    | -0.202495233 | 3.62E-06 | 1.16E-05 |
| SFRS12IP1 | 0.087652608  | 0.046795 | 0.072027 |
| SFRS12    | -0.252834803 | 5.93E-09 | 2.93E-08 |
| SFRS13A   | 0.103807317  | 0.018453 | 0.030971 |
| SFRS13B   | 0.151890377  | 0.000543 | 0.001209 |
| SFRS14    | -0.228891974 | 1.51E-07 | 6.03E-07 |
| SFRS15    | -0.154067325 | 0.00045  | 0.001018 |
| SFRS16    | -0.154116309 | 0.000448 | 0.001014 |
| SFRS17A   | -0.237109203 | 5.16E-08 | 2.22E-07 |
| SFRS18    | -0.396781848 | 7.26E-21 | 2.16E-19 |
| SFRS1     | 0.251147353  | 7.54E-09 | 3.68E-08 |
| SFRS2B    | -0.121734419 | 0.005672 | 0.010547 |
| SFRS2IP   | 0.011314528  | 0.797834 | 0.838262 |
| SFRS2     | 0.073825388  | 0.094214 | 0.134789 |
| SFRS3     | 0.243627541  | 2.14E-08 | 9.76E-08 |
| SFRS4     | -0.308090832 | 8.72E-13 | 7.70E-12 |
| SFRS5     | -0.335423443 | 5.23E-15 | 6.48E-14 |
| SFRS6     | -0.101168764 | 0.021664 | 0.035856 |
| SFRS7     | 0.17833218   | 4.70E-05 | 0.000126 |
| SFRS8     | -0.087407241 | 0.047416 | 0.072854 |
| SFRS9     | 0.45416069   | 1.42E-27 | 1.12E-25 |
| SFT2D1    | 0.130624094  | 0.002979 | 0.005822 |
| SFT2D2    | -0.022985569 | 0.602766 | 0.667891 |
| SFT2D3    | -0.116254395 | 0.008272 | 0.014914 |
| SFTA1P    | -0.418385767 | 3.06E-23 | 1.31E-21 |

|        |              |          |          |
|--------|--------------|----------|----------|
| SFTA2  | -0.222924922 | 3.20E-07 | 1.22E-06 |
| SFTA3  | -0.297071676 | 5.94E-12 | 4.59E-11 |
| SFTPA1 | -0.294858625 | 8.64E-12 | 6.53E-11 |
| SFTPA2 | -0.296345738 | 6.72E-12 | 5.16E-11 |
| SFTPB  | -0.286063058 | 3.72E-11 | 2.55E-10 |
| SFTPC  | -0.33311703  | 8.22E-15 | 9.82E-14 |
| SFTPD  | -0.372100475 | 2.34E-18 | 4.79E-17 |
| SFXN1  | 0.352069689  | 1.79E-16 | 2.74E-15 |
| SFXN2  | -0.139921032 | 0.001456 | 0.003007 |
| SFXN3  | -0.230410106 | 1.24E-07 | 5.04E-07 |
| SFXN4  | 0.347984511  | 4.17E-16 | 6.10E-15 |
| SFXN5  | -0.018142899 | 0.681248 | 0.738357 |
| SGCA   | -0.388871327 | 4.88E-20 | 1.27E-18 |
| SGCB   | 0.005776803  | 0.89595  | 0.91856  |
| SGCD   | -0.214420896 | 9.04E-07 | 3.20E-06 |
| SGCE   | -0.017594279 | 0.690381 | 0.746717 |
| SGCG   | -0.316904302 | 1.77E-13 | 1.73E-12 |
| SGCZ   | 0.048930216  | 0.267702 | 0.337316 |
| SGEF   | -0.238014799 | 4.58E-08 | 1.98E-07 |
| SGIP1  | -0.163188652 | 0.0002   | 0.000483 |
| SGK196 | 0.093082854  | 0.0347   | 0.05489  |
| SGK1   | -0.262944938 | 1.36E-09 | 7.40E-09 |
| SGK223 | -0.173900119 | 7.28E-05 | 0.000189 |
| SGK269 | -0.314394976 | 2.81E-13 | 2.66E-12 |
| SGK2   | 0.000865345  | 0.98437  | 0.9883   |
| SGK3   | -0.02332981  | 0.597345 | 0.662913 |
| SGK494 | -0.208332901 | 1.85E-06 | 6.24E-06 |
| SGMS1  | 0.021048518  | 0.633676 | 0.69528  |
| SGMS2  | -0.172684532 | 8.18E-05 | 0.000211 |
| SGOL1  | 0.532868733  | 4.08E-39 | 2.72E-36 |
| SGOL2  | 0.459522474  | 2.88E-28 | 2.42E-26 |
| SGPL1  | 0.15126002   | 0.000573 | 0.001271 |
| SGPP1  | 0.23226696   | 9.75E-08 | 4.02E-07 |
| SGPP2  | -0.186885571 | 1.97E-05 | 5.63E-05 |
| SGSH   | -0.341645167 | 1.52E-15 | 2.04E-14 |
| SGSM1  | -0.333201523 | 8.09E-15 | 9.67E-14 |
| SGSM2  | -0.345144044 | 7.47E-16 | 1.05E-14 |
| SGSM3  | -0.292796453 | 1.22E-11 | 9.02E-11 |
| SGTA   | 0.116604365  | 0.008078 | 0.014603 |
| SGTB   | 0.064566775  | 0.143407 | 0.196022 |
| SH2B1  | -0.415606242 | 6.32E-23 | 2.57E-21 |
| SH2B2  | 0.050064243  | 0.256757 | 0.325453 |
| SH2B3  | -0.207998691 | 1.93E-06 | 6.46E-06 |
| SH2D1A | -0.099587602 | 0.023813 | 0.039034 |

|          |              |          |          |
|----------|--------------|----------|----------|
| SH2D1B   | 0.069797812  | 0.113639 | 0.159465 |
| SH2D2A   | 0.091786064  | 0.037316 | 0.058623 |
| SH2D3A   | -0.062039255 | 0.159775 | 0.215463 |
| SH2D3C   | -0.355583201 | 8.55E-17 | 1.38E-15 |
| SH2D4A   | -0.077670871 | 0.078237 | 0.114346 |
| SH2D4B   | -0.144230702 | 0.001029 | 0.002185 |
| SH2D5    | 0.272308329  | 3.30E-10 | 1.97E-09 |
| SH2D6    | -0.018401129 | 0.676965 | 0.734392 |
| SH2D7    | -0.04121373  | 0.350607 | 0.425172 |
| SH3BGRL2 | -0.189535758 | 1.49E-05 | 4.35E-05 |
| SH3BGRL3 | 0.007118796  | 0.871967 | 0.900205 |
| SH3BGRL  | -0.215211153 | 8.23E-07 | 2.92E-06 |
| SH3BGR   | -0.236140247 | 5.87E-08 | 2.50E-07 |
| SH3BP1   | -0.064675477 | 0.142733 | 0.195207 |
| SH3BP2   | -0.08834261  | 0.045085 | 0.069652 |
| SH3BP4   | -0.063816922 | 0.148123 | 0.201572 |
| SH3BP5L  | -0.07020412  | 0.111547 | 0.156705 |
| SH3BP5   | -0.246481716 | 1.45E-08 | 6.76E-08 |
| SH3D19   | -0.117885816 | 0.007404 | 0.013476 |
| SH3D20   | -0.209493548 | 1.62E-06 | 5.49E-06 |
| SH3GL1   | 0.120867094  | 0.006027 | 0.011148 |
| SH3GL2   | -0.152043542 | 0.000536 | 0.001195 |
| SH3GL3   | -0.183039045 | 2.93E-05 | 8.13E-05 |
| SH3GLB1  | 0.096565988  | 0.028435 | 0.045891 |
| SH3GLB2  | -0.212459924 | 1.14E-06 | 3.96E-06 |
| SH3KBP1  | -0.0086514   | 0.844721 | 0.877015 |
| SH3PXD2A | -0.177403872 | 5.16E-05 | 0.000137 |
| SH3PXD2B | 0.129473194  | 0.003246 | 0.006298 |
| SH3RF1   | -0.213829423 | 9.70E-07 | 3.42E-06 |
| SH3RF2   | -0.130932738 | 0.002911 | 0.005699 |
| SH3RF3   | -0.194674286 | 8.60E-06 | 2.60E-05 |
| SH3TC1   | -0.270817484 | 4.16E-10 | 2.44E-09 |
| SH3TC2   | -0.008940299 | 0.839605 | 0.8727   |
| SH3YL1   | -0.160391147 | 0.000257 | 0.00061  |
| SHANK1   | 0.018954001  | 0.66783  | 0.726042 |
| SHANK2   | -0.136702709 | 0.001875 | 0.003796 |
| SHANK3   | -0.285128012 | 4.33E-11 | 2.94E-10 |
| SHARPIN  | 0.046676032  | 0.290397 | 0.361536 |
| SHBG     | -0.067530966 | 0.125882 | 0.174368 |
| SHB      | -0.053879885 | 0.222221 | 0.287099 |
| SHC1     | 0.231696973  | 1.05E-07 | 4.31E-07 |
| SHC2     | -0.271373013 | 3.82E-10 | 2.25E-09 |
| SHC3     | -0.269828646 | 4.84E-10 | 2.81E-09 |
| SHC4     | -0.096283876 | 0.028904 | 0.046563 |

|          |              |          |          |
|----------|--------------|----------|----------|
| SHCBP1   | 0.454080066  | 1.46E-27 | 1.14E-25 |
| SHD      | 0.069732457  | 0.113979 | 0.159829 |
| SHE      | -0.258659833 | 2.56E-09 | 1.33E-08 |
| SHFM1    | 0.264644885  | 1.06E-09 | 5.87E-09 |
| SHF      | -0.172829273 | 8.07E-05 | 0.000208 |
| SHH      | -0.325693397 | 3.43E-14 | 3.75E-13 |
| SHISA2   | -0.230060267 | 1.30E-07 | 5.25E-07 |
| SHISA3   | -0.282830177 | 6.29E-11 | 4.16E-10 |
| SHISA4   | -0.153566686 | 0.00047  | 0.001058 |
| SHISA5   | -0.023418589 | 0.59595  | 0.661916 |
| SHISA6   | -0.215554387 | 7.89E-07 | 2.81E-06 |
| SHISA7   | -0.097511541 | 0.026912 | 0.043663 |
| SHISA9   | -0.052452409 | 0.234731 | 0.301181 |
| SHKBP1   | 0.04402527   | 0.318693 | 0.391327 |
| SHMT1    | -0.020836046 | 0.637107 | 0.698316 |
| SHMT2    | 0.396777963  | 7.27E-21 | 2.16E-19 |
| SHOC2    | 0.127882568  | 0.003649 | 0.007011 |
| SHOX2    | 0.168167143  | 0.000126 | 0.000315 |
| SHOX     | -0.05114748  | 0.246595 | 0.314306 |
| SHPK     | 0.018926443  | 0.668284 | 0.726434 |
| SHPRH    | -0.12543812  | 0.004358 | 0.008271 |
| SHQ1     | 0.180466646  | 3.80E-05 | 0.000103 |
| SHROOM1  | -0.1526808   | 0.000507 | 0.001136 |
| SHROOM2  | -0.228381576 | 1.61E-07 | 6.40E-07 |
| SHROOM3  | -0.307152    | 1.03E-12 | 9.01E-12 |
| SHROOM4  | -0.432404644 | 7.06E-25 | 3.86E-23 |
| SIAE     | -0.081532564 | 0.064479 | 0.096146 |
| SIAH1    | 0.104950054  | 0.017196 | 0.02903  |
| SIAH2    | 0.143087051  | 0.00113  | 0.00238  |
| SIAH3    | -0.248058296 | 1.16E-08 | 5.50E-08 |
| SIDT1    | -0.229036595 | 1.48E-07 | 5.93E-07 |
| SIDT2    | -0.322922232 | 5.79E-14 | 6.06E-13 |
| SIGIRR   | -0.247673498 | 1.23E-08 | 5.79E-08 |
| SIGLEC10 | -0.026853517 | 0.543166 | 0.613969 |
| SIGLEC11 | -0.223959149 | 2.81E-07 | 1.08E-06 |
| SIGLEC12 | 0.062210491  | 0.158624 | 0.214112 |
| SIGLEC14 | -0.112222422 | 0.010816 | 0.019067 |
| SIGLEC15 | -0.074936414 | 0.08935  | 0.128614 |
| SIGLEC16 | -0.226381025 | 2.08E-07 | 8.13E-07 |
| SIGLEC1  | -0.258417919 | 2.66E-09 | 1.38E-08 |
| SIGLEC5  | -0.179340373 | 4.25E-05 | 0.000115 |
| SIGLEC6  | -0.311718498 | 4.56E-13 | 4.19E-12 |
| SIGLEC7  | -0.107291673 | 0.014853 | 0.025465 |
| SIGLEC8  | -0.283079069 | 6.04E-11 | 4.01E-10 |

|          |              |          |          |
|----------|--------------|----------|----------|
| SIGLEC9  | -0.144038879 | 0.001046 | 0.002216 |
| SIGLECP3 | -0.398770509 | 4.46E-21 | 1.37E-19 |
| SIGMAR1  | 0.323942298  | 4.78E-14 | 5.08E-13 |
| SIK1     | 0.037233852  | 0.399111 | 0.473804 |
| SIK2     | -0.006898806 | 0.875891 | 0.903072 |
| SIK3     | -0.142374829 | 0.001197 | 0.002509 |
| SIKE1    | 0.060782843  | 0.168418 | 0.225793 |
| SIL1     | -0.041894068 | 0.342705 | 0.416717 |
| SILV     | -0.012042153 | 0.785141 | 0.827405 |
| SIM1     | 0.095092493  | 0.030956 | 0.049531 |
| SIM2     | 0.014389633  | 0.744594 | 0.793522 |
| SIN3A    | -0.063386076 | 0.150886 | 0.204927 |
| SIN3B    | -0.222509888 | 3.37E-07 | 1.28E-06 |
| SIP1     | 0.335200594  | 5.47E-15 | 6.75E-14 |
| SIPA1L1  | 0.016653399  | 0.706149 | 0.761054 |
| SIPA1L2  | -0.196824619 | 6.80E-06 | 2.09E-05 |
| SIPA1L3  | -0.157861218 | 0.000323 | 0.000749 |
| SIPA1    | -0.147395836 | 0.000793 | 0.001718 |
| SIRPA    | -0.135430332 | 0.002069 | 0.004165 |
| SIRPB1   | -0.151013324 | 0.000585 | 0.001296 |
| SIRPB2   | -0.209255927 | 1.66E-06 | 5.64E-06 |
| SIRPD    | -0.063638832 | 0.149261 | 0.20294  |
| SIRPG    | -0.052797423 | 0.231663 | 0.297779 |
| SIRT1    | 0.033764334  | 0.444515 | 0.51877  |
| SIRT2    | -0.259066315 | 2.42E-09 | 1.26E-08 |
| SIRT3    | -0.241597507 | 2.83E-08 | 1.26E-07 |
| SIRT4    | -0.077163297 | 0.08021  | 0.116948 |
| SIRT5    | -0.022043617 | 0.617713 | 0.68113  |
| SIRT6    | 0.006721602  | 0.879054 | 0.905371 |
| SIRT7    | 0.015224914  | 0.730328 | 0.781509 |
| SIT1     | -0.126206366 | 0.004123 | 0.007856 |
| SIVA1    | 0.063739694  | 0.148616 | 0.202146 |
| SIX1     | -0.069497313 | 0.115206 | 0.161369 |
| SIX2     | -0.037199807 | 0.399543 | 0.474232 |
| SIX3     | -0.031460468 | 0.476221 | 0.549928 |
| SIX4     | 0.08352301   | 0.058206 | 0.087653 |
| SIX5     | -0.089737187 | 0.041788 | 0.065032 |
| SIX6     | -0.012546167 | 0.776382 | 0.820034 |
| SI       | 0.026762631  | 0.544532 | 0.6152   |
| SKA1     | 0.50743407   | 4.72E-35 | 1.33E-32 |
| SKA2     | 0.240084089  | 3.47E-08 | 1.53E-07 |
| SKA3     | 0.558187014  | 1.62E-43 | 2.15E-40 |
| SKAP1    | -0.051764877 | 0.240931 | 0.308031 |
| SKAP2    | 0.128880979  | 0.003391 | 0.006556 |

|         |              |          |          |
|---------|--------------|----------|----------|
| SKIL    | 0.14168401   | 0.001265 | 0.002644 |
| SKINTL  | -0.291023936 | 1.64E-11 | 1.19E-10 |
| SKIV2L2 | 0.113448489  | 0.009977 | 0.017722 |
| SKIV2L  | -0.091508637 | 0.037896 | 0.05948  |
| SKI     | -0.316978933 | 1.75E-13 | 1.71E-12 |
| SKP1    | 0.123236439  | 0.005101 | 0.009572 |
| SKP2    | 0.280587553  | 9.01E-11 | 5.84E-10 |
| SLA2    | -0.054506635 | 0.216881 | 0.28122  |
| SLAIN1  | -0.201096095 | 4.23E-06 | 1.34E-05 |
| SLAIN2  | 0.002336666  | 0.957813 | 0.967689 |
| SLAMF1  | -0.159214566 | 0.000286 | 0.000672 |
| SLAMF6  | -0.118027398 | 0.007333 | 0.013361 |
| SLAMF7  | -0.005593157 | 0.89924  | 0.921319 |
| SLAMF8  | -0.06854343  | 0.120293 | 0.167613 |
| SLAMF9  | 0.25607881   | 3.73E-09 | 1.89E-08 |
| SLA     | -0.18098883  | 3.60E-05 | 9.86E-05 |
| SLBP    | 0.339323015  | 2.42E-15 | 3.16E-14 |
| SLC10A1 | -0.078944716 | 0.073457 | 0.108047 |
| SLC10A2 | -0.215024648 | 8.41E-07 | 2.99E-06 |
| SLC10A3 | 0.004729872  | 0.914727 | 0.933311 |
| SLC10A4 | 0.04888579   | 0.268138 | 0.337791 |
| SLC10A5 | -0.059826207 | 0.17523  | 0.233781 |
| SLC10A6 | -0.004009931 | 0.927668 | 0.943385 |
| SLC10A7 | -0.075691784 | 0.08616  | 0.124507 |
| SLC11A1 | -0.13164735  | 0.002759 | 0.005424 |
| SLC11A2 | -0.128079155 | 0.003597 | 0.006919 |
| SLC12A1 | -0.081140642 | 0.065778 | 0.097942 |
| SLC12A2 | -0.053713732 | 0.223652 | 0.288745 |
| SLC12A3 | -0.099305703 | 0.024215 | 0.039637 |
| SLC12A4 | -0.415514932 | 6.47E-23 | 2.62E-21 |
| SLC12A5 | -0.179800974 | 4.06E-05 | 0.00011  |
| SLC12A6 | -0.243162931 | 2.28E-08 | 1.04E-07 |
| SLC12A7 | -0.03243159  | 0.462708 | 0.53668  |
| SLC12A8 | 0.340721312  | 1.83E-15 | 2.43E-14 |
| SLC12A9 | -0.262680564 | 1.42E-09 | 7.68E-09 |
| SLC13A1 | -0.030822598 | 0.485213 | 0.558859 |
| SLC13A2 | -0.167949109 | 0.000128 | 0.000321 |
| SLC13A3 | -0.010526952 | 0.811632 | 0.849589 |
| SLC13A4 | -0.174057396 | 7.16E-05 | 0.000186 |
| SLC13A5 | 0.101281643  | 0.021518 | 0.035639 |
| SLC14A1 | -0.291449527 | 1.53E-11 | 1.11E-10 |
| SLC14A2 | 0.028518814  | 0.518439 | 0.590627 |
| SLC15A1 | 0.099030436  | 0.024613 | 0.040233 |
| SLC15A2 | -0.421448804 | 1.36E-23 | 6.13E-22 |

|          |              |          |          |
|----------|--------------|----------|----------|
| SLC15A3  | -0.295211061 | 8.14E-12 | 6.18E-11 |
| SLC15A4  | 0.21186283   | 1.23E-06 | 4.24E-06 |
| SLC16A10 | -0.000479579 | 0.991338 | 0.993574 |
| SLC16A11 | -0.386747031 | 8.06E-20 | 2.04E-18 |
| SLC16A12 | -0.22557087  | 2.30E-07 | 8.93E-07 |
| SLC16A13 | 0.056191538  | 0.202984 | 0.265578 |
| SLC16A14 | 0.267294023  | 7.11E-10 | 4.04E-09 |
| SLC16A1  | 0.266194684  | 8.39E-10 | 4.72E-09 |
| SLC16A2  | -0.133567936 | 0.002386 | 0.004747 |
| SLC16A3  | 0.16065161   | 0.000252 | 0.000597 |
| SLC16A4  | -0.037459222 | 0.396261 | 0.471148 |
| SLC16A5  | -0.238260965 | 4.43E-08 | 1.92E-07 |
| SLC16A6  | -0.095650223 | 0.02998  | 0.048162 |
| SLC16A7  | -0.257358106 | 3.10E-09 | 1.59E-08 |
| SLC16A8  | -0.084862697 | 0.054275 | 0.082423 |
| SLC16A9  | -0.047859542 | 0.278326 | 0.348854 |
| SLC17A1  | -0.024223701 | 0.583371 | 0.650257 |
| SLC17A2  | 0.053478688  | 0.225687 | 0.290941 |
| SLC17A3  | -0.106470899 | 0.01564  | 0.026644 |
| SLC17A4  | 0.053812937  | 0.222796 | 0.287752 |
| SLC17A5  | 0.005995276  | 0.892039 | 0.915588 |
| SLC17A6  | 0.015355694  | 0.728103 | 0.77967  |
| SLC17A7  | -0.05674836  | 0.198537 | 0.260339 |
| SLC17A8  | -0.173661016 | 7.45E-05 | 0.000193 |
| SLC17A9  | -0.049910173 | 0.258226 | 0.326982 |
| SLC18A1  | -0.206990704 | 2.17E-06 | 7.19E-06 |
| SLC18A2  | -0.37025871  | 3.53E-18 | 7.04E-17 |
| SLC18A3  | -0.089540268 | 0.042241 | 0.065634 |
| SLC19A1  | 0.037509722  | 0.395624 | 0.470475 |
| SLC19A2  | 0.081106095  | 0.065893 | 0.098092 |
| SLC19A3  | -0.144137525 | 0.001037 | 0.0022   |
| SLC1A1   | -0.204072308 | 3.03E-06 | 9.80E-06 |
| SLC1A2   | -0.233206643 | 8.63E-08 | 3.59E-07 |
| SLC1A3   | -0.150230731 | 0.000625 | 0.001379 |
| SLC1A4   | -0.067171568 | 0.127914 | 0.176912 |
| SLC1A5   | 0.157186902  | 0.000343 | 0.000791 |
| SLC1A6   | 0.14651508   | 0.000853 | 0.001836 |
| SLC1A7   | -0.298997722 | 4.27E-12 | 3.36E-11 |
| SLC20A1  | 0.210927505  | 1.37E-06 | 4.70E-06 |
| SLC20A2  | -0.141581776 | 0.001275 | 0.002663 |
| SLC22A10 | -0.135064607 | 0.002128 | 0.004275 |
| SLC22A11 | -0.047361261 | 0.283366 | 0.35415  |
| SLC22A12 | -2.04E-06    | 0.999963 | 0.999963 |
| SLC22A13 | -0.003447988 | 0.937782 | 0.950913 |

|            |              |          |          |
|------------|--------------|----------|----------|
| SLC22A14   | -0.056062937 | 0.204021 | 0.266648 |
| SLC22A15   | -0.334092889 | 6.79E-15 | 8.26E-14 |
| SLC22A16   | -0.130861324 | 0.002927 | 0.005727 |
| SLC22A17   | -0.34108276  | 1.70E-15 | 2.28E-14 |
| SLC22A18AS | 0.01737117   | 0.694108 | 0.750058 |
| SLC22A18   | -0.179728791 | 4.09E-05 | 0.000111 |
| SLC22A1    | -0.093487754 | 0.033916 | 0.053769 |
| SLC22A20   | -0.187113063 | 1.92E-05 | 5.51E-05 |
| SLC22A23   | -0.198648353 | 5.56E-06 | 1.73E-05 |
| SLC22A24   | -0.050102061 | 0.256398 | 0.325017 |
| SLC22A25   | -0.008193654 | 0.852841 | 0.883701 |
| SLC22A2    | 0.012491459  | 0.777331 | 0.82082  |
| SLC22A3    | -0.334095207 | 6.79E-15 | 8.26E-14 |
| SLC22A4    | -0.135337492 | 0.002084 | 0.004193 |
| SLC22A5    | -0.203831823 | 3.11E-06 | 1.01E-05 |
| SLC22A6    | -0.039123317 | 0.375601 | 0.450441 |
| SLC22A7    | 0.001680296  | 0.969656 | 0.977185 |
| SLC22A8    | -0.051637334 | 0.242093 | 0.309317 |
| SLC22A9    | 0.049665257  | 0.260572 | 0.329411 |
| SLC23A1    | -0.10603985  | 0.016068 | 0.027294 |
| SLC23A2    | -0.065689345 | 0.136563 | 0.187641 |
| SLC23A3    | -0.20769412  | 2.00E-06 | 6.67E-06 |
| SLC24A1    | -0.189026885 | 1.57E-05 | 4.58E-05 |
| SLC24A2    | 0.114483091  | 0.009315 | 0.016628 |
| SLC24A3    | -0.1563252   | 0.00037  | 0.000848 |
| SLC24A4    | -0.306665474 | 1.12E-12 | 9.76E-12 |
| SLC24A5    | -0.187561099 | 1.83E-05 | 5.28E-05 |
| SLC24A6    | -0.028409118 | 0.52005  | 0.592192 |
| SLC25A10   | 0.218109719  | 5.79E-07 | 2.12E-06 |
| SLC25A11   | 0.094017783  | 0.032913 | 0.052323 |
| SLC25A12   | -0.035544711 | 0.420859 | 0.495472 |
| SLC25A13   | 0.281935762  | 7.26E-11 | 4.77E-10 |
| SLC25A14   | -0.130103331 | 0.003097 | 0.006033 |
| SLC25A15   | 0.376644304  | 8.38E-19 | 1.84E-17 |
| SLC25A16   | -0.059081421 | 0.180674 | 0.239938 |
| SLC25A17   | 0.130103477  | 0.003097 | 0.006033 |
| SLC25A18   | -0.051491831 | 0.243424 | 0.310819 |
| SLC25A19   | 0.046670376  | 0.290456 | 0.361587 |
| SLC25A1    | 0.045267442  | 0.305216 | 0.376957 |
| SLC25A20   | -0.039427497 | 0.371897 | 0.446777 |
| SLC25A21   | 0.317451412  | 1.60E-13 | 1.58E-12 |
| SLC25A22   | 0.052025368  | 0.238568 | 0.305341 |
| SLC25A23   | -0.315997369 | 2.09E-13 | 2.03E-12 |
| SLC25A24   | 0.148645864  | 0.000715 | 0.001561 |



|          |              |          |          |
|----------|--------------|----------|----------|
| SLC25A25 | -0.15037296  | 0.000618 | 0.001364 |
| SLC25A26 | -0.011758581 | 0.790081 | 0.831517 |
| SLC25A27 | -0.398786154 | 4.44E-21 | 1.36E-19 |
| SLC25A28 | -0.198030506 | 5.95E-06 | 1.85E-05 |
| SLC25A29 | -0.38354467  | 1.71E-19 | 4.17E-18 |
| SLC25A2  | -0.121848438 | 0.005627 | 0.010473 |
| SLC25A30 | -0.213893746 | 9.63E-07 | 3.39E-06 |
| SLC25A31 | -0.056290937 | 0.202185 | 0.264706 |
| SLC25A32 | 0.432096534  | 7.69E-25 | 4.16E-23 |
| SLC25A33 | 0.13966663   | 0.001486 | 0.003064 |
| SLC25A34 | -0.356047173 | 7.75E-17 | 1.26E-15 |
| SLC25A35 | -0.143198631 | 0.00112  | 0.002361 |
| SLC25A36 | -0.187057994 | 1.93E-05 | 5.54E-05 |
| SLC25A37 | -0.011398397 | 0.796368 | 0.836942 |
| SLC25A38 | -0.095530325 | 0.030188 | 0.048459 |
| SLC25A39 | 0.216803391  | 6.79E-07 | 2.45E-06 |
| SLC25A3  | 0.370766653  | 3.15E-18 | 6.33E-17 |
| SLC25A40 | 0.180754855  | 3.69E-05 | 0.000101 |
| SLC25A41 | -0.201484659 | 4.05E-06 | 1.29E-05 |
| SLC25A42 | -0.403466377 | 1.39E-21 | 4.68E-20 |
| SLC25A43 | 0.15769209   | 0.000328 | 0.000759 |
| SLC25A44 | -0.029358431 | 0.506196 | 0.578958 |
| SLC25A45 | -0.265391151 | 9.47E-10 | 5.29E-09 |
| SLC25A46 | 0.002380007  | 0.957031 | 0.967144 |
| SLC25A4  | -0.227896444 | 1.71E-07 | 6.79E-07 |
| SLC25A5  | 0.244041832  | 2.03E-08 | 9.26E-08 |
| SLC25A6  | 0.074376634  | 0.091775 | 0.131668 |
| SLC26A10 | -0.045197123 | 0.305969 | 0.377699 |
| SLC26A11 | -0.303508441 | 1.96E-12 | 1.63E-11 |
| SLC26A1  | -0.113532385 | 0.009922 | 0.017638 |
| SLC26A2  | 0.066310197  | 0.132887 | 0.183182 |
| SLC26A3  | -0.010831399 | 0.806291 | 0.845026 |
| SLC26A4  | 0.056786041  | 0.198238 | 0.259982 |
| SLC26A5  | -0.397997187 | 5.39E-21 | 1.63E-19 |
| SLC26A6  | -0.075802833 | 0.085699 | 0.123948 |
| SLC26A7  | -0.071639992 | 0.104396 | 0.147665 |
| SLC26A8  | -0.240254765 | 3.39E-08 | 1.50E-07 |
| SLC26A9  | -0.321263013 | 7.91E-14 | 8.12E-13 |
| SLC27A1  | -0.519829264 | 5.46E-37 | 2.26E-34 |
| SLC27A2  | 0.122359645  | 0.005428 | 0.010132 |
| SLC27A3  | -0.355041671 | 9.58E-17 | 1.52E-15 |
| SLC27A4  | 0.268196405  | 6.20E-10 | 3.56E-09 |
| SLC27A5  | 0.112735247  | 0.010458 | 0.018486 |
| SLC27A6  | -0.140582795 | 0.001382 | 0.002865 |

|          |              |          |          |
|----------|--------------|----------|----------|
| SLC28A1  | 0.034260685  | 0.437845 | 0.512092 |
| SLC28A2  | 0.067652341  | 0.125201 | 0.173509 |
| SLC28A3  | -0.159043236 | 0.000291 | 0.000681 |
| SLC29A1  | -0.200037822 | 4.77E-06 | 1.50E-05 |
| SLC29A2  | 0.04556996   | 0.301992 | 0.373667 |
| SLC29A3  | -0.151455456 | 0.000563 | 0.001252 |
| SLC29A4  | 0.006762963  | 0.878316 | 0.90489  |
| SLC2A10  | -0.030826767 | 0.485154 | 0.558856 |
| SLC2A11  | -0.276605359 | 1.69E-10 | 1.05E-09 |
| SLC2A12  | -0.203481481 | 3.24E-06 | 1.04E-05 |
| SLC2A13  | -0.114480676 | 0.009316 | 0.016629 |
| SLC2A14  | 0.073242426  | 0.096849 | 0.138213 |
| SLC2A1   | 0.360430415  | 3.04E-17 | 5.29E-16 |
| SLC2A2   | 0.088377473  | 0.045    | 0.069526 |
| SLC2A3   | 0.065568911  | 0.137285 | 0.188542 |
| SLC2A4RG | -0.002410998 | 0.956472 | 0.966774 |
| SLC2A4   | -0.233070538 | 8.78E-08 | 3.65E-07 |
| SLC2A5   | 0.123238815  | 0.0051   | 0.009572 |
| SLC2A6   | -0.049210071 | 0.264972 | 0.334276 |
| SLC2A7   | 0.193531431  | 9.73E-06 | 2.92E-05 |
| SLC2A8   | -0.116077523 | 0.008371 | 0.015074 |
| SLC2A9   | -0.210471173 | 1.44E-06 | 4.93E-06 |
| SLC30A10 | 0.23709576   | 5.17E-08 | 2.22E-07 |
| SLC30A1  | 0.105309154  | 0.016817 | 0.028452 |
| SLC30A2  | -0.150922525 | 0.00059  | 0.001305 |
| SLC30A3  | -0.170791951 | 9.81E-05 | 0.00025  |
| SLC30A4  | -0.057280428 | 0.194354 | 0.255525 |
| SLC30A5  | 0.121796671  | 0.005647 | 0.010507 |
| SLC30A6  | 0.269130618  | 5.38E-10 | 3.11E-09 |
| SLC30A7  | 0.139031521  | 0.001562 | 0.003207 |
| SLC30A8  | -0.071345229 | 0.105833 | 0.149459 |
| SLC30A9  | 0.107963331  | 0.014234 | 0.024483 |
| SLC31A1  | 0.070057313  | 0.1123   | 0.157718 |
| SLC31A2  | -0.110824429 | 0.011848 | 0.020678 |
| SLC32A1  | -0.019983422 | 0.650953 | 0.710841 |
| SLC33A1  | 0.274175078  | 2.47E-10 | 1.50E-09 |
| SLC34A1  | 0.071813495  | 0.103557 | 0.146624 |
| SLC34A2  | -0.393950341 | 1.44E-20 | 4.06E-19 |
| SLC34A3  | -0.03148783  | 0.475838 | 0.549517 |
| SLC35A1  | -0.081892629 | 0.063305 | 0.094595 |
| SLC35A2  | 0.235896324  | 6.06E-08 | 2.57E-07 |
| SLC35A3  | 0.100709669  | 0.02227  | 0.036761 |
| SLC35A4  | -0.206237628 | 2.36E-06 | 7.80E-06 |
| SLC35A5  | -0.064448793 | 0.144142 | 0.196929 |

|          |              |          |          |
|----------|--------------|----------|----------|
| SLC35B1  | 0.199299562  | 5.17E-06 | 1.62E-05 |
| SLC35B2  | 0.213390694  | 1.02E-06 | 3.59E-06 |
| SLC35B3  | 0.053096771  | 0.229023 | 0.294823 |
| SLC35B4  | 0.101934111  | 0.020686 | 0.034376 |
| SLC35C1  | 0.065809211  | 0.135847 | 0.186812 |
| SLC35C2  | 0.029400262  | 0.50559  | 0.578362 |
| SLC35D1  | 0.004899619  | 0.911679 | 0.930914 |
| SLC35D2  | 0.077292745  | 0.079703 | 0.116285 |
| SLC35D3  | 0.05682476   | 0.197932 | 0.259665 |
| SLC35E1  | -0.136541585 | 0.001899 | 0.003841 |
| SLC35E2  | -0.330195139 | 1.45E-14 | 1.67E-13 |
| SLC35E3  | 0.235154393  | 6.69E-08 | 2.82E-07 |
| SLC35E4  | 0.066669151  | 0.130796 | 0.180525 |
| SLC35F1  | -0.004097289 | 0.926097 | 0.942266 |
| SLC35F2  | 0.202298301  | 3.70E-06 | 1.18E-05 |
| SLC35F3  | -0.073904676 | 0.09386  | 0.134341 |
| SLC35F4  | 0.192691     | 1.06E-05 | 3.17E-05 |
| SLC35F5  | 0.177022052  | 5.36E-05 | 0.000142 |
| SLC36A1  | -0.109463177 | 0.012935 | 0.022424 |
| SLC36A2  | 0.015935512  | 0.718265 | 0.770994 |
| SLC36A3  | -0.075357965 | 0.087559 | 0.126363 |
| SLC36A4  | 0.261940705  | 1.58E-09 | 8.51E-09 |
| SLC37A1  | -0.125688163 | 0.00428  | 0.008131 |
| SLC37A2  | -0.271516139 | 3.73E-10 | 2.21E-09 |
| SLC37A3  | 0.203512611  | 3.22E-06 | 1.04E-05 |
| SLC37A4  | 0.013898783  | 0.753018 | 0.80073  |
| SLC38A10 | -0.247509833 | 1.26E-08 | 5.91E-08 |
| SLC38A11 | -0.003983747 | 0.928139 | 0.94372  |
| SLC38A1  | 0.178009468  | 4.86E-05 | 0.00013  |
| SLC38A2  | 0.299999623  | 3.59E-12 | 2.86E-11 |
| SLC38A3  | -0.067677832 | 0.125059 | 0.173348 |
| SLC38A4  | 0.082796663  | 0.060434 | 0.090755 |
| SLC38A5  | -0.005488602 | 0.901114 | 0.922671 |
| SLC38A6  | 0.022795284  | 0.605772 | 0.67059  |
| SLC38A7  | 0.168753249  | 0.000119 | 0.000299 |
| SLC38A8  | 0.174693936  | 6.73E-05 | 0.000176 |
| SLC38A9  | 0.176881277  | 5.43E-05 | 0.000144 |
| SLC39A10 | 0.134333388  | 0.002251 | 0.004496 |
| SLC39A11 | 0.085899839  | 0.051386 | 0.078421 |
| SLC39A12 | -0.086102734 | 0.050836 | 0.077666 |
| SLC39A13 | -0.265002607 | 1.00E-09 | 5.58E-09 |
| SLC39A14 | 0.346697581  | 5.44E-16 | 7.85E-15 |
| SLC39A1  | 0.210684308  | 1.41E-06 | 4.82E-06 |
| SLC39A2  | -0.071047372 | 0.107302 | 0.151351 |

|          |              |          |          |
|----------|--------------|----------|----------|
| SLC39A3  | 0.027028627  | 0.540539 | 0.61131  |
| SLC39A4  | 0.1044426    | 0.017744 | 0.029888 |
| SLC39A5  | 0.144767014  | 0.000985 | 0.002098 |
| SLC39A6  | 0.188983972  | 1.58E-05 | 4.59E-05 |
| SLC39A7  | 0.106262778  | 0.015845 | 0.026954 |
| SLC39A8  | -0.250785106 | 7.93E-09 | 3.85E-08 |
| SLC39A9  | 0.248975645  | 1.02E-08 | 4.90E-08 |
| SLC3A1   | -0.023938385 | 0.587814 | 0.654275 |
| SLC3A2   | 0.272768747  | 3.08E-10 | 1.84E-09 |
| SLC40A1  | -0.24569673  | 1.61E-08 | 7.48E-08 |
| SLC41A1  | -0.433892527 | 4.69E-25 | 2.65E-23 |
| SLC41A2  | 0.169703579  | 0.000109 | 0.000276 |
| SLC41A3  | -0.123701744 | 0.004935 | 0.00928  |
| SLC43A1  | -0.102017855 | 0.020582 | 0.034217 |
| SLC43A2  | -0.193666415 | 9.59E-06 | 2.88E-05 |
| SLC43A3  | -0.115259237 | 0.008844 | 0.015846 |
| SLC44A1  | 0.316179923  | 2.02E-13 | 1.97E-12 |
| SLC44A2  | -0.32229814  | 6.51E-14 | 6.79E-13 |
| SLC44A3  | -0.14258362  | 0.001177 | 0.002472 |
| SLC44A4  | -0.264978434 | 1.01E-09 | 5.60E-09 |
| SLC44A5  | 0.071699016  | 0.10411  | 0.147303 |
| SLC45A1  | 0.023617557  | 0.59283  | 0.658744 |
| SLC45A2  | -0.030953099 | 0.483366 | 0.557085 |
| SLC45A3  | -0.067612891 | 0.125422 | 0.173767 |
| SLC45A4  | 0.084128881  | 0.0564   | 0.085242 |
| SLC46A1  | -0.268060937 | 6.33E-10 | 3.63E-09 |
| SLC46A2  | -0.327916752 | 2.25E-14 | 2.51E-13 |
| SLC46A3  | -0.253299643 | 5.55E-09 | 2.75E-08 |
| SLC47A1  | -0.3508515   | 2.31E-16 | 3.47E-15 |
| SLC47A2  | -0.024196429 | 0.583795 | 0.650585 |
| SLC48A1  | -0.126641808 | 0.003995 | 0.007629 |
| SLC4A10  | 0.006109633  | 0.889992 | 0.913858 |
| SLC4A11  | -0.052671629 | 0.232778 | 0.298983 |
| SLC4A1AP | 0.152435806  | 0.000518 | 0.001158 |
| SLC4A1   | -0.090900286 | 0.039197 | 0.061304 |
| SLC4A2   | -0.024011428 | 0.586675 | 0.653139 |
| SLC4A3   | -0.067264329 | 0.127387 | 0.176257 |
| SLC4A4   | -0.266136306 | 8.47E-10 | 4.76E-09 |
| SLC4A5   | -0.117508418 | 0.007597 | 0.013799 |
| SLC4A7   | 0.01754725   | 0.691166 | 0.747404 |
| SLC4A8   | -0.157582259 | 0.000331 | 0.000766 |
| SLC4A9   | -0.102648464 | 0.019808 | 0.033041 |
| SLC5A10  | 0.156657036  | 0.000359 | 0.000826 |
| SLC5A11  | 0.074158079  | 0.092736 | 0.132836 |

|          |              |          |          |
|----------|--------------|----------|----------|
| SLC5A12  | 0.172325956  | 8.47E-05 | 0.000218 |
| SLC5A1   | -0.186899999 | 1.97E-05 | 5.63E-05 |
| SLC5A2   | -0.305244195 | 1.44E-12 | 1.23E-11 |
| SLC5A3   | -0.006322579 | 0.886184 | 0.910602 |
| SLC5A4   | -0.287849    | 2.78E-11 | 1.94E-10 |
| SLC5A5   | 0.05610725   | 0.203663 | 0.266258 |
| SLC5A6   | 0.261337523  | 1.73E-09 | 9.23E-09 |
| SLC5A7   | -0.237676646 | 4.79E-08 | 2.06E-07 |
| SLC5A8   | -0.09519577  | 0.030773 | 0.049259 |
| SLC5A9   | -0.29704626  | 5.96E-12 | 4.61E-11 |
| SLC6A10P | 0.213178818  | 1.05E-06 | 3.67E-06 |
| SLC6A11  | -0.009196864 | 0.835067 | 0.86882  |
| SLC6A12  | -0.145413601 | 0.000934 | 0.001997 |
| SLC6A13  | -0.16936671  | 0.000112 | 0.000284 |
| SLC6A14  | -0.061049885 | 0.166553 | 0.223456 |
| SLC6A15  | 0.155752884  | 0.000389 | 0.000888 |
| SLC6A16  | -0.323369976 | 5.33E-14 | 5.61E-13 |
| SLC6A17  | 0.213625518  | 9.94E-07 | 3.49E-06 |
| SLC6A18  | -0.158562305 | 0.000303 | 0.000708 |
| SLC6A19  | 0.039146405  | 0.375319 | 0.450157 |
| SLC6A1   | -0.182462331 | 3.10E-05 | 8.58E-05 |
| SLC6A20  | -0.27996027  | 9.95E-11 | 6.42E-10 |
| SLC6A2   | -0.073477624 | 0.095779 | 0.136823 |
| SLC6A3   | -0.123761593 | 0.004914 | 0.009243 |
| SLC6A4   | -0.259317677 | 2.33E-09 | 1.22E-08 |
| SLC6A5   | 0.014911978  | 0.735662 | 0.785979 |
| SLC6A6   | -0.073014445 | 0.097895 | 0.139597 |
| SLC6A7   | -0.211084212 | 1.34E-06 | 4.62E-06 |
| SLC6A8   | 0.210727632  | 1.40E-06 | 4.80E-06 |
| SLC6A9   | -0.138487184 | 0.001631 | 0.003337 |
| SLC7A10  | -0.187448503 | 1.86E-05 | 5.33E-05 |
| SLC7A11  | 0.284266639  | 4.98E-11 | 3.34E-10 |
| SLC7A13  | 0.047987832  | 0.277038 | 0.347567 |
| SLC7A14  | -0.013800179 | 0.754714 | 0.801979 |
| SLC7A1   | 0.315868386  | 2.14E-13 | 2.07E-12 |
| SLC7A2   | 0.129899535  | 0.003144 | 0.006117 |
| SLC7A3   | -0.059119867 | 0.18039  | 0.239625 |
| SLC7A4   | -0.243806011 | 2.09E-08 | 9.54E-08 |
| SLC7A5P1 | 0.093401412  | 0.034082 | 0.054007 |
| SLC7A5P2 | -0.055736701 | 0.20667  | 0.269677 |
| SLC7A5   | 0.356569721  | 6.93E-17 | 1.14E-15 |
| SLC7A6OS | 0.051703555  | 0.241489 | 0.308684 |
| SLC7A6   | -0.270531003 | 4.34E-10 | 2.55E-09 |
| SLC7A7   | -0.052057999 | 0.238274 | 0.305002 |

|          |              |          |          |
|----------|--------------|----------|----------|
| SLC7A8   | -0.243281894 | 2.25E-08 | 1.02E-07 |
| SLC7A9   | 0.06919521   | 0.116799 | 0.163302 |
| SLC8A1   | -0.172450014 | 8.37E-05 | 0.000215 |
| SLC8A2   | -0.060869721 | 0.16781  | 0.225037 |
| SLC8A3   | -0.32772423  | 2.33E-14 | 2.60E-13 |
| SLC9A10  | -0.114872278 | 0.009076 | 0.016227 |
| SLC9A11  | -0.303951411 | 1.81E-12 | 1.52E-11 |
| SLC9A1   | -0.297167306 | 5.84E-12 | 4.52E-11 |
| SLC9A2   | -0.059105335 | 0.180497 | 0.239736 |
| SLC9A3R1 | -0.069740478 | 0.113937 | 0.159782 |
| SLC9A3R2 | -0.204148751 | 3.00E-06 | 9.72E-06 |
| SLC9A3   | -0.185011196 | 2.39E-05 | 6.73E-05 |
| SLC9A4   | -0.127318316 | 0.003803 | 0.007285 |
| SLC9A5   | -0.30549522  | 1.38E-12 | 1.18E-11 |
| SLC9A6   | -0.137764257 | 0.001726 | 0.003518 |
| SLC9A7   | 0.095786107  | 0.029746 | 0.047818 |
| SLC9A8   | -0.21137258  | 1.30E-06 | 4.47E-06 |
| SLC9A9   | -0.254624946 | 4.60E-09 | 2.30E-08 |
| SLCO1A2  | 0.067200587  | 0.127749 | 0.176709 |
| SLCO1B1  | 0.136235147  | 0.001944 | 0.003928 |
| SLCO1B3  | 0.087469639  | 0.047258 | 0.072649 |
| SLCO1C1  | -0.088961212 | 0.043597 | 0.067515 |
| SLCO2A1  | -0.225869809 | 2.21E-07 | 8.62E-07 |
| SLCO2B1  | -0.221790139 | 3.69E-07 | 1.39E-06 |
| SLCO3A1  | -0.366197466 | 8.67E-18 | 1.64E-16 |
| SLCO4A1  | 0.120569515  | 0.006153 | 0.01136  |
| SLCO4C1  | -0.26882273  | 5.64E-10 | 3.25E-09 |
| SLCO5A1  | 0.107392641  | 0.014758 | 0.02531  |
| SLCO6A1  | 0.100717006  | 0.02226  | 0.036751 |
| SLED1    | -0.160762179 | 0.000249 | 0.000591 |
| SLFN11   | -0.070859913 | 0.108234 | 0.152577 |
| SLFN12L  | -0.180024294 | 3.97E-05 | 0.000108 |
| SLFN12   | -0.26869359  | 5.75E-10 | 3.31E-09 |
| SLFN13   | -0.160560194 | 0.000254 | 0.000601 |
| SLFN14   | -0.321148199 | 8.08E-14 | 8.27E-13 |
| SLFN5    | -0.1251702   | 0.004443 | 0.008418 |
| SLFNL1   | -0.424615027 | 5.86E-24 | 2.79E-22 |
| SLIT1    | -0.161431661 | 0.000234 | 0.00056  |
| SLIT2    | -0.228473085 | 1.59E-07 | 6.33E-07 |
| SLIT3    | -0.324551144 | 4.26E-14 | 4.58E-13 |
| SLITRK1  | 0.088996584  | 0.043513 | 0.067403 |
| SLITRK2  | -0.13557507  | 0.002046 | 0.004122 |
| SLITRK3  | -0.250681715 | 8.05E-09 | 3.90E-08 |
| SLITRK4  | -0.014736016 | 0.738667 | 0.788574 |

|          |              |          |          |
|----------|--------------|----------|----------|
| SLITRK5  | -0.052569365 | 0.233688 | 0.300054 |
| SLITRK6  | -0.094313097 | 0.032365 | 0.051542 |
| SLK      | 0.102361555  | 0.020157 | 0.033566 |
| SLMAP    | 0.103552292  | 0.018744 | 0.031423 |
| SLMO1    | 0.06182842   | 0.161202 | 0.217108 |
| SLMO2    | 0.389880439  | 3.84E-20 | 1.02E-18 |
| SLN      | -0.088699263 | 0.044222 | 0.06843  |
| SLPI     | -0.24985769  | 9.04E-09 | 4.36E-08 |
| SLTM     | -0.164760623 | 0.000173 | 0.000423 |
| SLU7     | -0.17656049  | 5.61E-05 | 0.000148 |
| SLURP1   | 0.03999222   | 0.365081 | 0.439726 |
| SMAD1    | 0.046390178  | 0.293365 | 0.36464  |
| SMAD2    | 0.100636331  | 0.022368 | 0.036902 |
| SMAD3    | -0.049268892 | 0.264401 | 0.33366  |
| SMAD4    | -0.010336124 | 0.814985 | 0.852563 |
| SMAD5OS  | -0.098845979 | 0.024883 | 0.040637 |
| SMAD5    | 0.037815894  | 0.391776 | 0.466676 |
| SMAD6    | -0.369424419 | 4.25E-18 | 8.43E-17 |
| SMAD7    | -0.268073368 | 6.32E-10 | 3.62E-09 |
| SMAD9    | -0.171884344 | 8.84E-05 | 0.000227 |
| SMAGP    | 0.210144909  | 1.50E-06 | 5.11E-06 |
| SMAP1    | 0.146314741  | 0.000868 | 0.001864 |
| SMAP2    | -0.279786987 | 1.02E-10 | 6.58E-10 |
| SMARCA1  | 0.08734241   | 0.047582 | 0.07308  |
| SMARCA2  | -0.424089292 | 6.74E-24 | 3.17E-22 |
| SMARCA4  | -0.180859448 | 3.65E-05 | 9.98E-05 |
| SMARCA5  | 0.04756209   | 0.281327 | 0.351998 |
| SMARCAD1 | 0.158073706  | 0.000317 | 0.000736 |
| SMARCAL1 | 0.210536588  | 1.43E-06 | 4.90E-06 |
| SMARCB1  | 0.175377202  | 6.30E-05 | 0.000165 |
| SMARCC1  | 0.168095857  | 0.000127 | 0.000317 |
| SMARCC2  | -0.093492831 | 0.033906 | 0.053762 |
| SMARCD1  | 0.12963262   | 0.003207 | 0.00623  |
| SMARCD2  | 0.031943644  | 0.469471 | 0.543232 |
| SMARCD3  | -0.356595878 | 6.90E-17 | 1.13E-15 |
| SMARCE1  | 0.142063198  | 0.001227 | 0.002569 |
| SMC1A    | 0.075748061  | 0.085927 | 0.124214 |
| SMC1B    | 0.086247284  | 0.050447 | 0.077152 |
| SMC2     | 0.343249594  | 1.10E-15 | 1.51E-14 |
| SMC3     | 0.218300209  | 5.66E-07 | 2.07E-06 |
| SMC4     | 0.178744717  | 4.52E-05 | 0.000121 |
| SMC5     | -0.061980365 | 0.160173 | 0.21594  |
| SMC6     | 0.128839136  | 0.003401 | 0.006575 |
| SMCHD1   | 0.031432763  | 0.47661  | 0.550314 |

|         |              |          |          |
|---------|--------------|----------|----------|
| SMCP    | 0.005514982  | 0.900641 | 0.922376 |
| SMCR5   | -0.253476899 | 5.42E-09 | 2.69E-08 |
| SMCR7L  | 0.144318945  | 0.001022 | 0.002172 |
| SMCR7   | -0.254882094 | 4.43E-09 | 2.22E-08 |
| SMCR8   | -0.109529172 | 0.01288  | 0.022331 |
| SMEK1   | 0.092298347  | 0.036263 | 0.057159 |
| SMEK2   | 0.221452025  | 3.84E-07 | 1.44E-06 |
| SMEK3P  | 0.102958486  | 0.019437 | 0.032471 |
| SMG1    | -0.158567355 | 0.000303 | 0.000707 |
| SMG5    | 0.081111672  | 0.065875 | 0.098071 |
| SMG6    | -0.260247019 | 2.03E-09 | 1.07E-08 |
| SMG7    | 0.045725345  | 0.300345 | 0.371836 |
| SMN1    | 0.045648321  | 0.301161 | 0.372754 |
| SMN2    | 0.238600582  | 4.23E-08 | 1.84E-07 |
| SMNDC1  | 0.439469545  | 9.88E-26 | 6.19E-24 |
| SMOC1   | 0.127135817  | 0.003854 | 0.007375 |
| SMOC2   | -0.148847329 | 0.000703 | 0.001538 |
| SMOX    | 0.29832546   | 4.79E-12 | 3.74E-11 |
| SMO     | -0.007877762 | 0.858453 | 0.888549 |
| SMPD1   | -0.264262648 | 1.12E-09 | 6.18E-09 |
| SMPD2   | -0.111458532 | 0.011369 | 0.019953 |
| SMPD3   | -0.232133414 | 9.92E-08 | 4.09E-07 |
| SMPD4   | 0.087631904  | 0.046847 | 0.072085 |
| SMPDL3A | -0.056602165 | 0.199697 | 0.261689 |
| SMPDL3B | -0.0428055   | 0.332298 | 0.405964 |
| SMPX    | -0.154320142 | 0.00044  | 0.000998 |
| SMR3A   | -0.111822451 | 0.011102 | 0.019516 |
| SMR3B   | -0.082542984 | 0.061228 | 0.091859 |
| SMS     | 0.352875904  | 1.51E-16 | 2.34E-15 |
| SMTNL1  | -0.036087142 | 0.413801 | 0.488428 |
| SMTNL2  | -0.193625221 | 9.63E-06 | 2.89E-05 |
| SMTN    | 0.082052661  | 0.062789 | 0.093918 |
| SMU1    | 0.197706979  | 6.17E-06 | 1.91E-05 |
| SMUG1   | 0.281206081  | 8.16E-11 | 5.33E-10 |
| SMURF1  | 0.025502205  | 0.563653 | 0.632795 |
| SMURF2  | -0.054855076 | 0.213952 | 0.277926 |
| SMYD1   | 0.036845391  | 0.404052 | 0.478759 |
| SMYD2   | 0.14509849   | 0.000959 | 0.002046 |
| SMYD3   | 0.065314657  | 0.138819 | 0.19044  |
| SMYD4   | -0.299333635 | 4.03E-12 | 3.18E-11 |
| SMYD5   | 0.135593122  | 0.002043 | 0.004117 |
| SNAI1   | 0.196675086  | 6.91E-06 | 2.12E-05 |
| SNAI2   | 0.186783984  | 1.99E-05 | 5.69E-05 |
| SNAI3   | -0.33794455  | 3.18E-15 | 4.09E-14 |



|            |              |          |          |
|------------|--------------|----------|----------|
| SNAP23     | 0.049725489  | 0.259994 | 0.328859 |
| SNAP25     | -0.024553821 | 0.578249 | 0.645592 |
| SNAP29     | -0.021745892 | 0.622471 | 0.685469 |
| SNAP47     | 0.082686184  | 0.060779 | 0.091232 |
| SNAP91     | -0.085572883 | 0.052283 | 0.079633 |
| SNAPC1     | 0.329781247  | 1.57E-14 | 1.81E-13 |
| SNAPC2     | -0.061764544 | 0.161636 | 0.217619 |
| SNAPC3     | 0.142477945  | 0.001187 | 0.002491 |
| SNAPC4     | -0.166777667 | 0.000143 | 0.000356 |
| SNAPC5     | 0.162792853  | 0.000207 | 0.0005   |
| SNAPIN     | 0.111592123  | 0.011271 | 0.019794 |
| SNAR-B2    | -0.014507502 | 0.742575 | 0.791732 |
| SNAR-G1    | 0.036447598  | 0.409149 | 0.483866 |
| SNCAIP     | -0.097484779 | 0.026954 | 0.043727 |
| SNCA       | -0.216046792 | 7.44E-07 | 2.66E-06 |
| SNCB       | 0.113475303  | 0.009959 | 0.017695 |
| SNCG       | 0.191280902  | 1.24E-05 | 3.66E-05 |
| SND1       | 0.244446043  | 1.92E-08 | 8.80E-08 |
| SNED1      | -0.405658818 | 8.05E-22 | 2.77E-20 |
| SNF8       | 0.30255527   | 2.31E-12 | 1.90E-11 |
| SNHG10     | -0.045021148 | 0.307858 | 0.37975  |
| SNHG11     | -0.026034292 | 0.555542 | 0.625059 |
| SNHG12     | -0.23744253  | 4.94E-08 | 2.13E-07 |
| SNHG1      | 0.141671149  | 0.001266 | 0.002646 |
| SNHG3-RCC1 | 0.101690427  | 0.020993 | 0.034846 |
| SNHG3      | -0.050626517 | 0.251447 | 0.319554 |
| SNHG4      | 0.153192974  | 0.000485 | 0.001091 |
| SNHG5      | 0.018446936  | 0.676206 | 0.733728 |
| SNHG6      | 0.301030027  | 3.01E-12 | 2.42E-11 |
| SNHG7      | -0.019802775 | 0.653902 | 0.713594 |
| SNHG8      | -0.004244049 | 0.923458 | 0.940203 |
| SNHG9      | -0.158287557 | 0.000311 | 0.000724 |
| SNIP1      | -0.041933894 | 0.342246 | 0.416386 |
| SNN        | -0.189715106 | 1.46E-05 | 4.28E-05 |
| SNORA10    | 0.034715825  | 0.43178  | 0.50645  |
| SNORA11D   | -0.041910215 | 0.342519 | 0.416584 |
| SNORA11E   | -0.042621666 | 0.334381 | 0.408134 |
| SNORA11    | -0.018312785 | 0.678429 | 0.73578  |
| SNORA12    | 0.073484537  | 0.095747 | 0.136797 |
| SNORA13    | -0.048473166 | 0.272203 | 0.34221  |
| SNORA14A   | 0.052675304  | 0.232745 | 0.29896  |
| SNORA14B   | -0.008378076 | 0.849568 | 0.881158 |
| SNORA15    | 0.010081723  | 0.819459 | 0.855989 |
| SNORA16A   | -0.036498059 | 0.4085   | 0.483171 |

|          |              |          |          |
|----------|--------------|----------|----------|
| SNORA16B | -0.023783131 | 0.590239 | 0.656339 |
| SNORA18  | 0.099142479  | 0.02445  | 0.039989 |
| SNORA1   | -0.016529128 | 0.708241 | 0.762609 |
| SNORA20  | 0.074892024  | 0.089541 | 0.128851 |
| SNORA21  | -0.07017036  | 0.11172  | 0.156926 |
| SNORA22  | 0.001411955  | 0.9745   | 0.980831 |
| SNORA23  | 0.061820323  | 0.161257 | 0.217167 |
| SNORA24  | -0.046961374 | 0.287455 | 0.358453 |
| SNORA25  | -0.049898148 | 0.258341 | 0.327086 |
| SNORA26  | 0.014027011  | 0.750814 | 0.798854 |
| SNORA27  | 0.028345707  | 0.520982 | 0.593051 |
| SNORA28  | 0.041011023  | 0.352984 | 0.427602 |
| SNORA29  | -0.038047841 | 0.388876 | 0.463719 |
| SNORA2A  | 0.048983441  | 0.267182 | 0.336775 |
| SNORA2B  | 0.014615777  | 0.740723 | 0.790136 |
| SNORA31  | -0.017847187 | 0.686165 | 0.7428   |
| SNORA32  | 0.06092461   | 0.167426 | 0.224568 |
| SNORA34  | 0.047053668  | 0.286508 | 0.357504 |
| SNORA36A | -0.059983439 | 0.174097 | 0.232424 |
| SNORA37  | -0.07288643  | 0.098487 | 0.14034  |
| SNORA38B | 0.072223461  | 0.101596 | 0.144236 |
| SNORA38  | -0.024239144 | 0.583131 | 0.650026 |
| SNORA39  | -0.226174926 | 2.13E-07 | 8.32E-07 |
| SNORA3   | 0.041558546  | 0.346588 | 0.420977 |
| SNORA40  | 0.094629419  | 0.031787 | 0.05073  |
| SNORA41  | 0.055940343  | 0.205014 | 0.267814 |
| SNORA42  | 0.017467534  | 0.692497 | 0.748514 |
| SNORA44  | -0.018813296 | 0.67015  | 0.728106 |
| SNORA45  | -0.0640764   | 0.146478 | 0.199605 |
| SNORA46  | -0.043322366 | 0.326488 | 0.39977  |
| SNORA47  | -0.002028228 | 0.963377 | 0.971788 |
| SNORA48  | 0.003838208  | 0.930758 | 0.945901 |
| SNORA49  | 0.016601898  | 0.707015 | 0.761577 |
| SNORA4   | -0.023108874 | 0.600822 | 0.666032 |
| SNORA50  | -0.048164674 | 0.275269 | 0.34563  |
| SNORA51  | 0.07054787   | 0.109801 | 0.154513 |
| SNORA52  | -0.005461047 | 0.901608 | 0.923082 |
| SNORA53  | 0.090444222  | 0.040196 | 0.06275  |
| SNORA54  | -0.026645387 | 0.546297 | 0.616832 |
| SNORA55  | -0.051024774 | 0.247732 | 0.315554 |
| SNORA56  | 4.21E-05     | 0.99924  | 0.99959  |
| SNORA57  | -0.037913245 | 0.390558 | 0.465308 |
| SNORA58  | 0.008635799  | 0.844998 | 0.877256 |
| SNORA59B | -0.015907951 | 0.718732 | 0.771442 |

|             |              |          |          |
|-------------|--------------|----------|----------|
| SNORA5A     | 0.050335094  | 0.25419  | 0.322669 |
| SNORA5B     | 0.014336987  | 0.745496 | 0.794338 |
| SNORA5C     | 0.021672948  | 0.623639 | 0.686528 |
| SNORA61     | 0.037392543  | 0.397103 | 0.471981 |
| SNORA62     | -0.052606692 | 0.233355 | 0.299666 |
| SNORA63     | -0.03098406  | 0.482929 | 0.556645 |
| SNORA64     | -0.008223962 | 0.852303 | 0.883372 |
| SNORA65     | 0.042192218  | 0.339278 | 0.413397 |
| SNORA66     | -0.009287155 | 0.833471 | 0.867633 |
| SNORA67     | -0.031506399 | 0.475577 | 0.54925  |
| SNORA68     | -0.001329929 | 0.975981 | 0.982173 |
| SNORA6      | 0.076380419  | 0.083333 | 0.120884 |
| SNORA70B    | -0.049064272 | 0.266392 | 0.335876 |
| SNORA70     | -0.023935535 | 0.587859 | 0.654275 |
| SNORA71A    | 0.013297326  | 0.763381 | 0.809639 |
| SNORA71B    | 0.029686599  | 0.501452 | 0.574385 |
| SNORA71C    | 0.010718882  | 0.808264 | 0.846729 |
| SNORA71D    | 0.081947419  | 0.063128 | 0.094382 |
| SNORA72     | -0.076965871 | 0.080989 | 0.117902 |
| SNORA74A    | 0.118216786  | 0.007238 | 0.013196 |
| SNORA74B    | -0.021307513 | 0.629505 | 0.691653 |
| SNORA75     | -0.011157515 | 0.80058  | 0.840352 |
| SNORA76     | 0.094677327  | 0.0317   | 0.050608 |
| SNORA77     | -0.007956722 | 0.85705  | 0.887326 |
| SNORA78     | -0.011130055 | 0.80106  | 0.84068  |
| SNORA79     | 0.027435895  | 0.534453 | 0.60566  |
| SNORA7B     | -0.196320811 | 7.18E-06 | 2.20E-05 |
| SNORA80     | 0.061899584  | 0.160719 | 0.216575 |
| SNORA81     | -0.060740358 | 0.168716 | 0.226117 |
| SNORA84     | -0.04538263  | 0.303986 | 0.375762 |
| SNORA8      | -0.037341736 | 0.397745 | 0.472511 |
| SNORA9      | -0.067662803 | 0.125143 | 0.17344  |
| SNORD10     | -0.095259918 | 0.03066  | 0.049101 |
| SNORD115-26 | -0.014239781 | 0.747162 | 0.795604 |
| SNORD116-20 | -0.179867705 | 4.04E-05 | 0.000109 |
| SNORD116-28 | -0.257213299 | 3.16E-09 | 1.62E-08 |
| SNORD116-4  | -0.130234277 | 0.003067 | 0.00598  |
| SNORD15A    | 0.086847218  | 0.04886  | 0.074899 |
| SNORD15B    | 0.072944151  | 0.09822  | 0.139999 |
| SNORD17     | 0.125906887  | 0.004213 | 0.008011 |
| SNORD1C     | -0.07329424  | 0.096612 | 0.137925 |
| SNORD22     | 0.004794976  | 0.913558 | 0.932404 |
| SNORD89     | -0.007116263 | 0.872012 | 0.900205 |
| SNORD94     | -0.0829533   | 0.059948 | 0.090066 |

|          |              |          |          |
|----------|--------------|----------|----------|
| SNORD97  | -0.027775575 | 0.529403 | 0.601233 |
| SNPH     | -0.123294151 | 0.00508  | 0.009535 |
| SNRK     | -0.199790854 | 4.90E-06 | 1.54E-05 |
| SNRNP200 | 0.033091325  | 0.453651 | 0.527828 |
| SNRNP25  | 0.163931322  | 0.000187 | 0.000454 |
| SNRNP27  | 0.255880815  | 3.84E-09 | 1.94E-08 |
| SNRNP35  | -0.07091905  | 0.10794  | 0.152183 |
| SNRNP40  | 0.221110173  | 4.01E-07 | 1.50E-06 |
| SNRNP48  | 0.127165381  | 0.003845 | 0.007362 |
| SNRNP70  | -0.23976775  | 3.62E-08 | 1.59E-07 |
| SNRPA1   | 0.453878965  | 1.55E-27 | 1.21E-25 |
| SNRPA    | 0.174003919  | 7.20E-05 | 0.000187 |
| SNRPB2   | 0.277759157  | 1.41E-10 | 8.89E-10 |
| SNRPB    | 0.338464467  | 2.87E-15 | 3.72E-14 |
| SNRPC    | 0.346633129  | 5.51E-16 | 7.93E-15 |
| SNRPD1   | 0.471377016  | 7.56E-30 | 8.04E-28 |
| SNRPD2   | 0.29328684   | 1.13E-11 | 8.35E-11 |
| SNRPD3   | 0.15441647   | 0.000437 | 0.00099  |
| SNRPE    | 0.376210282  | 9.25E-19 | 2.03E-17 |
| SNRPF    | 0.43785324   | 1.56E-25 | 9.46E-24 |
| SNRPG    | 0.373499514  | 1.71E-18 | 3.57E-17 |
| SNRPN    | -0.161343846 | 0.000236 | 0.000563 |
| SNTA1    | -0.02559492  | 0.562235 | 0.631594 |
| SNTB1    | -0.085765541 | 0.051753 | 0.078928 |
| SNTB2    | -0.108867891 | 0.013438 | 0.023211 |
| SNTG1    | 0.024544333  | 0.578396 | 0.645684 |
| SNTG2    | -0.206523828 | 2.29E-06 | 7.56E-06 |
| SNTN     | -0.282891473 | 6.22E-11 | 4.12E-10 |
| SNUPN    | 0.216629733  | 6.93E-07 | 2.49E-06 |
| SNURF    | -0.017079078 | 0.698999 | 0.754568 |
| SNW1     | 0.320137525  | 9.75E-14 | 9.88E-13 |
| SNX10    | 0.033615307  | 0.446529 | 0.520938 |
| SNX11    | 0.092704897  | 0.035446 | 0.055981 |
| SNX12    | 0.169050243  | 0.000116 | 0.000292 |
| SNX13    | -0.102487093 | 0.020004 | 0.033331 |
| SNX14    | -0.019217198 | 0.663498 | 0.722135 |
| SNX15    | 0.030622972  | 0.488046 | 0.561378 |
| SNX16    | 0.161980711  | 0.000223 | 0.000535 |
| SNX17    | 0.10595129   | 0.016157 | 0.027436 |
| SNX18    | -0.256498122 | 3.51E-09 | 1.78E-08 |
| SNX19    | -0.12523535  | 0.004422 | 0.008381 |
| SNX1     | -0.363638307 | 1.52E-17 | 2.74E-16 |
| SNX20    | -0.263770533 | 1.21E-09 | 6.62E-09 |
| SNX21    | -0.096655277 | 0.028288 | 0.04568  |

|        |              |          |          |
|--------|--------------|----------|----------|
| SNX22  | -0.071223589 | 0.106431 | 0.150258 |
| SNX24  | -0.17845981  | 4.65E-05 | 0.000125 |
| SNX25  | -0.365886585 | 9.28E-18 | 1.75E-16 |
| SNX27  | -0.044567603 | 0.312762 | 0.384849 |
| SNX29  | -0.396534264 | 7.71E-21 | 2.28E-19 |
| SNX2   | -0.146374214 | 0.000863 | 0.001856 |
| SNX30  | -0.409021642 | 3.44E-22 | 1.24E-20 |
| SNX31  | -0.081827492 | 0.063516 | 0.094876 |
| SNX32  | -0.049711412 | 0.260129 | 0.328955 |
| SNX33  | -0.183769183 | 2.72E-05 | 7.58E-05 |
| SNX3   | 0.096979744  | 0.02776  | 0.044899 |
| SNX4   | 0.105820055  | 0.01629  | 0.027638 |
| SNX5   | 0.040834859  | 0.355057 | 0.429643 |
| SNX6   | 0.356409628  | 7.17E-17 | 1.17E-15 |
| SNX7   | 0.158443807  | 0.000306 | 0.000714 |
| SNX8   | 0.046933026  | 0.287747 | 0.358683 |
| SNX9   | 0.128233793  | 0.003556 | 0.006847 |
| SOAT1  | 0.082496691  | 0.061374 | 0.092043 |
| SOAT2  | -0.175311166 | 6.34E-05 | 0.000166 |
| SOBP   | -0.217872095 | 5.96E-07 | 2.17E-06 |
| SOCS1  | -0.186065461 | 2.14E-05 | 6.09E-05 |
| SOCS2  | -0.111165121 | 0.011588 | 0.020288 |
| SOCS3  | 0.006020103  | 0.891594 | 0.915268 |
| SOCS4  | 0.3344136    | 6.38E-15 | 7.81E-14 |
| SOCS5  | -0.023161026 | 0.6      | 0.665343 |
| SOCS6  | 0.100088227  | 0.023114 | 0.038024 |
| SOCS7  | 0.013675893  | 0.756853 | 0.803825 |
| SOD1   | 0.122949792  | 0.005206 | 0.009751 |
| SOD2   | 0.129842564  | 0.003158 | 0.006142 |
| SOD3   | -0.302666515 | 2.26E-12 | 1.87E-11 |
| SOHLH1 | 0.09616226   | 0.029108 | 0.046848 |
| SOHLH2 | 0.074182733  | 0.092627 | 0.132728 |
| SOLH   | -0.097465532 | 0.026985 | 0.043763 |
| SON    | -0.253924096 | 5.08E-09 | 2.53E-08 |
| SORBS1 | -0.362801731 | 1.82E-17 | 3.25E-16 |
| SORBS2 | -0.197948481 | 6.01E-06 | 1.86E-05 |
| SORBS3 | -0.345378938 | 7.12E-16 | 1.00E-14 |
| SORCS1 | -0.312607786 | 3.88E-13 | 3.61E-12 |
| SORCS2 | -0.335471595 | 5.18E-15 | 6.43E-14 |
| SORCS3 | -0.085043452 | 0.053762 | 0.081693 |
| SORD   | 0.324018376  | 4.71E-14 | 5.02E-13 |
| SORL1  | -0.211779983 | 1.24E-06 | 4.27E-06 |
| SORT1  | -0.313657614 | 3.21E-13 | 3.03E-12 |
| SOS1   | -0.016153961 | 0.71457  | 0.76777  |

|         |              |          |          |
|---------|--------------|----------|----------|
| SOS2    | 0.028331274  | 0.521194 | 0.593259 |
| SOSTDC1 | -0.326787629 | 2.79E-14 | 3.08E-13 |
| SOST    | -0.00205156  | 0.962956 | 0.971511 |
| SOX10   | -0.239961283 | 3.53E-08 | 1.55E-07 |
| SOX11   | -0.03892425  | 0.378037 | 0.452819 |
| SOX12   | 0.097588408  | 0.026792 | 0.043492 |
| SOX13   | -0.320526761 | 9.07E-14 | 9.24E-13 |
| SOX14   | 0.034777024  | 0.430968 | 0.505557 |
| SOX15   | 0.112926252  | 0.010327 | 0.018276 |
| SOX17   | -0.248791214 | 1.05E-08 | 5.01E-08 |
| SOX18   | -0.157535384 | 0.000332 | 0.000769 |
| SOX1    | -0.135312213 | 0.002088 | 0.0042   |
| SOX21   | 0.119218035  | 0.006757 | 0.01239  |
| SOX20T  | -0.010327136 | 0.815143 | 0.852683 |
| SOX2    | -0.016706832 | 0.70525  | 0.760208 |
| SOX30   | 0.059523747  | 0.177426 | 0.236379 |
| SOX3    | -0.036095313 | 0.413695 | 0.488343 |
| SOX4    | 0.114930977  | 0.009041 | 0.016167 |
| SOX5    | -0.1806146   | 3.74E-05 | 0.000102 |
| SOX6    | -0.29086953  | 1.69E-11 | 1.22E-10 |
| SOX7    | -0.223106439 | 3.13E-07 | 1.19E-06 |
| SOX8    | -0.341916045 | 1.44E-15 | 1.94E-14 |
| SOX9    | -0.108184146 | 0.014036 | 0.024171 |
| SP100   | -0.136575779 | 0.001894 | 0.003832 |
| SP110   | -0.140694863 | 0.001369 | 0.002841 |
| SP140L  | -0.044015845 | 0.318796 | 0.391407 |
| SP140   | -0.118713531 | 0.006996 | 0.012787 |
| SP1     | 0.029781912  | 0.500078 | 0.573009 |
| SP2     | -0.203253861 | 3.32E-06 | 1.07E-05 |
| SP3     | 0.115076134  | 0.008953 | 0.016027 |
| SP4     | -0.121943992 | 0.005589 | 0.01041  |
| SP5     | 0.049354343  | 0.263572 | 0.33274  |
| SP6     | 0.151060282  | 0.000583 | 0.001291 |
| SP7     | -0.004836755 | 0.912808 | 0.931876 |
| SP8     | 0.083627899  | 0.05789  | 0.087236 |
| SP9     | 0.127820519  | 0.003666 | 0.00704  |
| SPA17   | 0.034778094  | 0.430954 | 0.505557 |
| SPACA1  | -0.044586133 | 0.31256  | 0.384625 |
| SPACA3  | -0.064999713 | 0.140737 | 0.192741 |
| SPACA4  | -0.259550376 | 2.25E-09 | 1.18E-08 |
| SPACA5  | -0.194093863 | 9.15E-06 | 2.76E-05 |
| SPAG11A | 0.085098597  | 0.053606 | 0.081475 |
| SPAG11B | 0.067552638  | 0.12576  | 0.174211 |
| SPAG16  | -0.050656142 | 0.251169 | 0.319298 |

|          |              |          |          |
|----------|--------------|----------|----------|
| SPAG17   | -0.289053904 | 2.28E-11 | 1.61E-10 |
| SPAG1    | -0.006706366 | 0.879326 | 0.905511 |
| SPAG4    | 0.172517338  | 8.32E-05 | 0.000214 |
| SPAG5    | 0.435476552  | 3.02E-25 | 1.76E-23 |
| SPAG6    | -0.199844859 | 4.87E-06 | 1.53E-05 |
| SPAG7    | -0.027454773 | 0.534171 | 0.605376 |
| SPAG8    | -0.36248908  | 1.95E-17 | 3.46E-16 |
| SPAG9    | -0.229148771 | 1.46E-07 | 5.85E-07 |
| SPAM1    | -0.039871854 | 0.366528 | 0.441228 |
| SPANXA2  | 0.222392707  | 3.42E-07 | 1.30E-06 |
| SPANXB2  | 0.230818728  | 1.18E-07 | 4.79E-07 |
| SPANXC   | 0.242060711  | 2.65E-08 | 1.19E-07 |
| SPANXE   | 0.231397807  | 1.09E-07 | 4.48E-07 |
| SPANXN1  | 0.029784547  | 0.50004  | 0.572998 |
| SPANXN2  | 0.055811967  | 0.206057 | 0.268983 |
| SPANXN3  | 0.109917495  | 0.012563 | 0.02182  |
| SPANXN4  | 0.094806128  | 0.031467 | 0.050277 |
| SPANXN5  | 0.055579232  | 0.207957 | 0.27118  |
| SPARCL1  | -0.346808614 | 5.31E-16 | 7.69E-15 |
| SPARC    | 0.067802695  | 0.124362 | 0.17249  |
| SPAST    | 0.226175741  | 2.13E-07 | 8.32E-07 |
| SPATA12  | -0.006124888 | 0.889719 | 0.913625 |
| SPATA13  | -0.19709722  | 6.60E-06 | 2.03E-05 |
| SPATA16  | 0.060621166  | 0.169555 | 0.227058 |
| SPATA17  | -0.074894631 | 0.089529 | 0.128844 |
| SPATA18  | -0.352237207 | 1.73E-16 | 2.66E-15 |
| SPATA19  | -0.203148549 | 3.36E-06 | 1.08E-05 |
| SPATA1   | -0.080322876 | 0.068557 | 0.10161  |
| SPATA20  | -0.205740628 | 2.50E-06 | 8.23E-06 |
| SPATA21  | 0.051412174  | 0.244155 | 0.311554 |
| SPATA22  | 0.006400979  | 0.884782 | 0.909743 |
| SPATA24  | -0.147793315 | 0.000767 | 0.001667 |
| SPATA2L  | -0.050000641 | 0.257363 | 0.326109 |
| SPATA2   | 0.036553486  | 0.407789 | 0.482557 |
| SPATA3   | 0.014015743  | 0.751008 | 0.799018 |
| SPATA4   | -0.167413255 | 0.000135 | 0.000336 |
| SPATA5L1 | 0.234890644  | 6.92E-08 | 2.92E-07 |
| SPATA5   | 0.234733037  | 7.07E-08 | 2.97E-07 |
| SPATA6   | -0.389002837 | 4.73E-20 | 1.24E-18 |
| SPATA7   | -0.085939411 | 0.051278 | 0.07827  |
| SPATA8   | 0.076319258  | 0.083581 | 0.121191 |
| SPATA9   | -0.163153669 | 0.0002   | 0.000485 |
| SPATC1   | -0.194899032 | 8.39E-06 | 2.54E-05 |
| SPATS1   | -0.189773161 | 1.45E-05 | 4.25E-05 |

|         |              |          |          |
|---------|--------------|----------|----------|
| SPATS2L | 0.053489066  | 0.225597 | 0.290881 |
| SPATS2  | 0.45870262   | 3.68E-28 | 3.06E-26 |
| SPC24   | 0.389299344  | 4.40E-20 | 1.16E-18 |
| SPC25   | 0.478858869  | 7.06E-31 | 8.93E-29 |
| SPCS1   | 0.178490173  | 4.63E-05 | 0.000124 |
| SPCS2   | 0.213556647  | 1.00E-06 | 3.52E-06 |
| SPCS3   | 0.213287103  | 1.04E-06 | 3.63E-06 |
| SPDEF   | 0.020667321  | 0.639837 | 0.700886 |
| SPDYA   | -0.058038409 | 0.188507 | 0.248935 |
| SPDYC   | 0.157389745  | 0.000337 | 0.000778 |
| SPDYE1  | -0.244869228 | 1.81E-08 | 8.33E-08 |
| SPDYE2  | -0.069095531 | 0.117328 | 0.163905 |
| SPDYE3  | 0.122846032  | 0.005244 | 0.009817 |
| SPDYE4  | -0.094190683 | 0.032591 | 0.051878 |
| SPDYE5  | -0.20803567  | 1.92E-06 | 6.44E-06 |
| SPDYE6  | -0.18595219  | 2.17E-05 | 6.16E-05 |
| SPDYE7P | -0.216837857 | 6.76E-07 | 2.44E-06 |
| SPDYE8P | -0.204506791 | 2.88E-06 | 9.37E-06 |
| SPEF1   | -0.216862971 | 6.74E-07 | 2.43E-06 |
| SPEF2   | -0.329425991 | 1.68E-14 | 1.92E-13 |
| SPEG    | -0.153060558 | 0.000491 | 0.001102 |
| SPEM1   | 0.081317888  | 0.065188 | 0.097114 |
| SPEN    | -0.259911262 | 2.13E-09 | 1.12E-08 |
| SPERT   | 0.097400739  | 0.027087 | 0.04391  |
| SPESP1  | 0.077044412  | 0.080678 | 0.117536 |
| SPG11   | -0.232834171 | 9.06E-08 | 3.76E-07 |
| SPG20   | -0.087455001 | 0.047295 | 0.07269  |
| SPG21   | 0.066062634  | 0.134343 | 0.184973 |
| SPG7    | -0.207921582 | 1.94E-06 | 6.51E-06 |
| SPHAR   | -0.173495137 | 7.57E-05 | 0.000196 |
| SPHK1   | 0.273695727  | 2.67E-10 | 1.61E-09 |
| SPHK2   | -0.156497746 | 0.000364 | 0.000836 |
| SPHKAP  | -0.135600182 | 0.002042 | 0.004115 |
| SPI1    | -0.247961973 | 1.18E-08 | 5.57E-08 |
| SPIB    | -0.23400761  | 7.77E-08 | 3.25E-07 |
| SPIC    | -0.049418736 | 0.262949 | 0.332016 |
| SPIN1   | 0.168647528  | 0.00012  | 0.000302 |
| SPIN2A  | 0.067841696  | 0.124145 | 0.172261 |
| SPIN2B  | -0.064794062 | 0.142001 | 0.194285 |
| SPIN3   | -0.14598436  | 0.000892 | 0.001911 |
| SPIN4   | 0.26779402   | 6.59E-10 | 3.77E-09 |
| SPINK13 | -0.203257412 | 3.32E-06 | 1.07E-05 |
| SPINK14 | -0.068693437 | 0.119481 | 0.166576 |
| SPINK1  | -0.043047807 | 0.329566 | 0.402996 |



|         |              |          |          |
|---------|--------------|----------|----------|
| SPINK2  | -0.21931724  | 5.00E-07 | 1.85E-06 |
| SPINK4  | 0.087456117  | 0.047292 | 0.07269  |
| SPINK5  | -0.326717957 | 2.82E-14 | 3.12E-13 |
| SPINK6  | 0.075671045  | 0.086247 | 0.124622 |
| SPINK7  | -0.062840029 | 0.154444 | 0.209077 |
| SPINK8  | -0.010248194 | 0.816531 | 0.85361  |
| SPINK9  | -0.048006357 | 0.276852 | 0.347378 |
| SPINLW1 | -0.214159011 | 9.33E-07 | 3.29E-06 |
| SPINT1  | -0.059366263 | 0.178577 | 0.237628 |
| SPINT2  | 0.078793954  | 0.07401  | 0.108765 |
| SPINT3  | -0.016307714 | 0.711974 | 0.765722 |
| SPINT4  | -0.029578373 | 0.503014 | 0.575745 |
| SPIRE1  | -0.082160923 | 0.062441 | 0.093454 |
| SPIRE2  | -0.074421267 | 0.09158  | 0.131442 |
| SPNS1   | -0.078268606 | 0.075963 | 0.111463 |
| SPNS2   | -0.226279256 | 2.10E-07 | 8.23E-07 |
| SPNS3   | -0.360880485 | 2.76E-17 | 4.82E-16 |
| SPN     | -0.357805206 | 5.33E-17 | 8.89E-16 |
| SPO11   | -0.026273159 | 0.551919 | 0.621823 |
| SPOCD1  | 0.128662752  | 0.003446 | 0.006654 |
| SPOCK1  | 0.262464235  | 1.47E-09 | 7.92E-09 |
| SPOCK2  | -0.257822091 | 2.90E-09 | 1.49E-08 |
| SPOCK3  | -0.009454503 | 0.830516 | 0.86513  |
| SPON1   | -0.188867718 | 1.60E-05 | 4.64E-05 |
| SPON2   | -0.048240874 | 0.27451  | 0.344871 |
| SPOPL   | 0.137507914  | 0.001761 | 0.003581 |
| SPOP    | -0.090334835 | 0.040439 | 0.063099 |
| SPP1    | 0.166186748  | 0.000152 | 0.000374 |
| SPP2    | 0.050251571  | 0.254979 | 0.323466 |
| SPPL2A  | 0.050109366  | 0.256328 | 0.324971 |
| SPPL2B  | -0.199893373 | 4.84E-06 | 1.52E-05 |
| SPPL3   | 0.029657795  | 0.501867 | 0.574696 |
| SPRED1  | -0.159616496 | 0.000276 | 0.00065  |
| SPRED2  | -0.253452144 | 5.43E-09 | 2.70E-08 |
| SPRED3  | 0.168732269  | 0.000119 | 0.0003   |
| SPRN    | -0.130423691 | 0.003024 | 0.005902 |
| SPRR1A  | -0.065399455 | 0.138306 | 0.189801 |
| SPRR1B  | -0.011280996 | 0.79842  | 0.83879  |
| SPRR2A  | -0.024286656 | 0.582392 | 0.649311 |
| SPRR2B  | -0.016364954 | 0.711008 | 0.765053 |
| SPRR2C  | -0.040763108 | 0.355904 | 0.430436 |
| SPRR2D  | -0.005235833 | 0.905646 | 0.926221 |
| SPRR2E  | 0.059171116  | 0.180012 | 0.23925  |
| SPRR2F  | -0.023385449 | 0.59647  | 0.662347 |

|         |              |          |          |
|---------|--------------|----------|----------|
| SPRR2G  | -0.089288055 | 0.042827 | 0.066467 |
| SPRR3   | -0.049861021 | 0.258695 | 0.327453 |
| SPRR4   | -0.012121252 | 0.783764 | 0.82626  |
| SPRY1   | -0.308833165 | 7.64E-13 | 6.81E-12 |
| SPRY2   | -0.275698602 | 1.95E-10 | 1.20E-09 |
| SPRY3   | -0.081100625 | 0.065912 | 0.098112 |
| SPRY4   | -0.311758768 | 4.52E-13 | 4.17E-12 |
| SPRYD3  | -0.117839857 | 0.007427 | 0.013514 |
| SPRYD4  | 0.154697706  | 0.000426 | 0.000968 |
| SPRYD5  | -0.199226968 | 5.22E-06 | 1.63E-05 |
| SPR     | -0.003463019 | 0.937512 | 0.950782 |
| SPSB1   | -0.094124072 | 0.032715 | 0.052054 |
| SPSB2   | -0.025817284 | 0.558843 | 0.628278 |
| SPSB3   | -0.357656532 | 5.50E-17 | 9.17E-16 |
| SPSB4   | -0.082246675 | 0.062167 | 0.0931   |
| SPTA1   | 0.021899084  | 0.620021 | 0.683185 |
| SPTAN1  | -0.212815717 | 1.09E-06 | 3.81E-06 |
| SPTBN1  | -0.183387213 | 2.82E-05 | 7.85E-05 |
| SPTBN2  | -0.020692559 | 0.639428 | 0.700553 |
| SPTBN4  | -0.164295487 | 0.00018  | 0.00044  |
| SPTBN5  | -0.290482147 | 1.80E-11 | 1.29E-10 |
| SPTB    | -0.075165909 | 0.088371 | 0.127397 |
| SPTLC1  | 0.220053043  | 4.57E-07 | 1.70E-06 |
| SPTLC2  | -0.109189257 | 0.013164 | 0.022786 |
| SPTLC3  | -0.347937166 | 4.21E-16 | 6.16E-15 |
| SPTY2D1 | 0.22388948   | 2.84E-07 | 1.09E-06 |
| SPZ1    | 0.034801036  | 0.430649 | 0.505361 |
| SQLE    | 0.250780342  | 7.94E-09 | 3.85E-08 |
| SQRDL   | 0.129372022  | 0.00327  | 0.00634  |
| SQSTM1  | -0.086399412 | 0.050041 | 0.076604 |
| SR140   | 0.106096121  | 0.016011 | 0.027205 |
| SRA1    | 0.038480408  | 0.383503 | 0.458082 |
| SRBD1   | 0.015314067  | 0.728811 | 0.780261 |
| SRCAP   | -0.146296252 | 0.000869 | 0.001867 |
| SRCIN1  | -0.261273816 | 1.75E-09 | 9.32E-09 |
| SRCRB4D | 0.084338778  | 0.055785 | 0.084402 |
| SRC     | 0.000439297  | 0.992065 | 0.994163 |
| SRD5A1  | 0.129937595  | 0.003136 | 0.006101 |
| SRD5A2  | -0.104438887 | 0.017749 | 0.029892 |
| SRD5A3  | 0.012142997  | 0.783386 | 0.825904 |
| SREBF1  | -0.107075389 | 0.015057 | 0.025771 |
| SREBF2  | -0.1378097   | 0.00172  | 0.003508 |
| SRFBP1  | 0.156185068  | 0.000374 | 0.000857 |
| SRF     | -0.025855822 | 0.558256 | 0.62775  |

|        |              |          |          |
|--------|--------------|----------|----------|
| SRGAP1 | 0.268847861  | 5.62E-10 | 3.24E-09 |
| SRGAP2 | -0.183842778 | 2.70E-05 | 7.53E-05 |
| SRGAP3 | -0.408861207 | 3.58E-22 | 1.29E-20 |
| SRGN   | 0.041051244  | 0.352511 | 0.427134 |
| SRI    | 0.0714373    | 0.105383 | 0.148914 |
| SRL    | -0.369185646 | 4.48E-18 | 8.83E-17 |
| SRMS   | 0.10867011   | 0.013608 | 0.023487 |
| SRM    | 0.313920878  | 3.06E-13 | 2.89E-12 |
| SRP14  | 0.079825765  | 0.070292 | 0.103897 |
| SRP19  | 0.248458065  | 1.10E-08 | 5.23E-08 |
| SRP54  | 0.264294796  | 1.12E-09 | 6.16E-09 |
| SRP68  | 0.121180578  | 0.005896 | 0.010925 |
| SRP72  | 0.407356709  | 5.24E-22 | 1.85E-20 |
| SRP9   | 0.282225058  | 6.93E-11 | 4.56E-10 |
| SRPK1  | 0.443241816  | 3.39E-26 | 2.26E-24 |
| SRPK2  | 0.238544882  | 4.26E-08 | 1.85E-07 |
| SRPK3  | -0.027705763 | 0.530439 | 0.601999 |
| SRPRB  | 0.352211657  | 1.74E-16 | 2.67E-15 |
| SRPR   | 0.035819558  | 0.417274 | 0.491976 |
| SRPX2  | 0.114965582  | 0.00902  | 0.016131 |
| SRPX   | -0.134668867 | 0.002194 | 0.004396 |
| SRRD   | 0.271395207  | 3.80E-10 | 2.25E-09 |
| SRRM1  | -0.162129607 | 0.00022  | 0.000528 |
| SRRM2  | -0.299180979 | 4.14E-12 | 3.26E-11 |
| SRRM3  | -0.068097761 | 0.122729 | 0.170674 |
| SRRM4  | -0.018885656 | 0.668957 | 0.727007 |
| SRRM5  | -0.145388978 | 0.000936 | 0.002    |
| SRRT   | 0.040385511  | 0.360381 | 0.43514  |
| SRR    | -0.073482613 | 0.095756 | 0.1368   |
| SRXN1  | 0.325322114  | 3.68E-14 | 4.00E-13 |
| SRY    | 0.074551897  | 0.09101  | 0.130777 |
| SS18L1 | -0.123230585 | 0.005103 | 0.009575 |
| SS18L2 | 0.105926454  | 0.016182 | 0.027476 |
| SS18   | -0.059281076 | 0.179203 | 0.238317 |
| SSBP1  | 0.335951565  | 4.72E-15 | 5.88E-14 |
| SSBP2  | -0.301491011 | 2.78E-12 | 2.25E-11 |
| SSBP3  | -0.193011344 | 1.03E-05 | 3.07E-05 |
| SSBP4  | -0.202271509 | 3.71E-06 | 1.19E-05 |
| SSB    | 0.358879413  | 4.24E-17 | 7.17E-16 |
| SSC5D  | -0.26289518  | 1.37E-09 | 7.45E-09 |
| SSFA2  | 0.005134026  | 0.907472 | 0.927661 |
| SSH1   | -0.05698934  | 0.196634 | 0.2582   |
| SSH2   | -0.193371044 | 9.90E-06 | 2.96E-05 |
| SSH3   | -0.133169974 | 0.00246  | 0.004879 |

|            |              |          |          |
|------------|--------------|----------|----------|
| SSNA1      | 0.071509238  | 0.105032 | 0.148491 |
| SSPN       | -0.098597261 | 0.025251 | 0.041191 |
| SSPO       | -0.269896468 | 4.79E-10 | 2.79E-09 |
| SSR1       | 0.376124901  | 9.43E-19 | 2.06E-17 |
| SSR2       | 0.166639889  | 0.000145 | 0.00036  |
| SSR3       | 0.373086619  | 1.88E-18 | 3.87E-17 |
| SSR4       | 0.073738625  | 0.094602 | 0.135306 |
| SSRP1      | 0.301759345  | 2.65E-12 | 2.16E-11 |
| SSSCA1     | 0.118826998  | 0.006942 | 0.012693 |
| SSTR1      | -0.183412684 | 2.82E-05 | 7.83E-05 |
| SSTR2      | 0.242442949  | 2.52E-08 | 1.14E-07 |
| SSTR3      | -0.152922203 | 0.000497 | 0.001114 |
| SSTR4      | -0.215705976 | 7.75E-07 | 2.77E-06 |
| SSTR5      | -0.020552814 | 0.641693 | 0.702547 |
| SST        | 0.03204328   | 0.468086 | 0.54181  |
| SSU72      | 0.021006633  | 0.634352 | 0.695792 |
| SSX1       | 0.076840801  | 0.081485 | 0.11853  |
| SSX2IP     | 0.310090697  | 6.10E-13 | 5.53E-12 |
| SSX2       | 0.064029776  | 0.146773 | 0.199952 |
| SSX3       | 0.038543905  | 0.382718 | 0.457303 |
| SSX4       | 0.068532394  | 0.120353 | 0.167673 |
| SSX5       | 0.021629381  | 0.624337 | 0.687069 |
| SSX6       | 0.106336983  | 0.015772 | 0.026848 |
| SSX7       | 0.005924887  | 0.893299 | 0.916497 |
| SSX8       | 0.038561042  | 0.382506 | 0.457077 |
| ST13       | 0.097377433  | 0.027124 | 0.043956 |
| ST14       | -0.012163571 | 0.783028 | 0.825614 |
| ST18       | -0.049627116 | 0.260939 | 0.329729 |
| ST20       | 0.014842893  | 0.736842 | 0.787004 |
| ST3GAL1    | -0.124468495 | 0.004673 | 0.008827 |
| ST3GAL2    | -0.147597702 | 0.00078  | 0.001691 |
| ST3GAL3    | -0.22725958  | 1.86E-07 | 7.32E-07 |
| ST3GAL4    | 0.172493376  | 8.34E-05 | 0.000214 |
| ST3GAL5    | -0.379271288 | 4.60E-19 | 1.05E-17 |
| ST3GAL6    | -0.368465803 | 5.26E-18 | 1.03E-16 |
| ST5        | -0.365021902 | 1.12E-17 | 2.07E-16 |
| ST6GAL1    | -0.186051031 | 2.15E-05 | 6.10E-05 |
| ST6GAL2    | -0.03869042  | 0.38091  | 0.455416 |
| ST6GALNAC1 | -0.203416189 | 3.26E-06 | 1.05E-05 |
| ST6GALNAC2 | -0.267463937 | 6.93E-10 | 3.95E-09 |
| ST6GALNAC3 | 0.058500345  | 0.185007 | 0.244831 |
| ST6GALNAC4 | -0.116023444 | 0.008401 | 0.015123 |
| ST6GALNAC5 | 0.016072912  | 0.71594  | 0.768825 |
| ST6GALNAC6 | -0.401351329 | 2.36E-21 | 7.62E-20 |

|          |              |          |          |
|----------|--------------|----------|----------|
| ST7L     | -0.197604251 | 6.24E-06 | 1.93E-05 |
| ST7OT1   | -0.21599181  | 7.49E-07 | 2.68E-06 |
| ST7OT2   | -0.07474856  | 0.090158 | 0.129665 |
| ST7OT3   | -0.127307059 | 0.003806 | 0.007289 |
| ST7OT4   | 0.127514723  | 0.003749 | 0.007191 |
| ST7      | -0.11304505  | 0.010246 | 0.018153 |
| ST8SIA1  | -0.312201652 | 4.18E-13 | 3.87E-12 |
| ST8SIA2  | -0.08950202  | 0.04233  | 0.065741 |
| ST8SIA3  | -0.019275932 | 0.662533 | 0.721281 |
| ST8SIA4  | -0.131966293 | 0.002694 | 0.00531  |
| ST8SIA5  | -0.11207509  | 0.010921 | 0.019235 |
| ST8SIA6  | -0.173808965 | 7.34E-05 | 0.000191 |
| STAB1    | -0.158603199 | 0.000302 | 0.000705 |
| STAB2    | -0.078762891 | 0.074124 | 0.108925 |
| STAC2    | -0.243819301 | 2.09E-08 | 9.52E-08 |
| STAC3    | -0.198470683 | 5.67E-06 | 1.76E-05 |
| STAC     | -0.199051516 | 5.32E-06 | 1.66E-05 |
| STAG1    | 0.112410694  | 0.010683 | 0.018848 |
| STAG2    | 0.067523051  | 0.125926 | 0.174405 |
| STAG3L1  | -0.130683888 | 0.002966 | 0.005798 |
| STAG3L2  | -0.110051133 | 0.012455 | 0.021652 |
| STAG3L3  | -0.255722786 | 3.92E-09 | 1.98E-08 |
| STAG3L4  | 0.124295976  | 0.004731 | 0.008929 |
| STAG3    | -0.057380819 | 0.193572 | 0.254667 |
| STAM2    | 0.010007914  | 0.820758 | 0.857122 |
| STAMBPL1 | -0.027730977 | 0.530064 | 0.601745 |
| STAMBP   | 0.274483534  | 2.36E-10 | 1.44E-09 |
| STAM     | 0.27546326   | 2.02E-10 | 1.24E-09 |
| STAP1    | -0.24407595  | 2.02E-08 | 9.23E-08 |
| STAP2    | -0.069204876 | 0.116747 | 0.163242 |
| STARD10  | 0.080062687  | 0.069461 | 0.10282  |
| STARD13  | -0.201244301 | 4.16E-06 | 1.32E-05 |
| STARD3NL | 0.192382688  | 1.10E-05 | 3.27E-05 |
| STARD3   | -0.06659329  | 0.131236 | 0.181069 |
| STARD4   | 0.07791611   | 0.077297 | 0.113138 |
| STARD5   | -0.248584316 | 1.08E-08 | 5.15E-08 |
| STARD6   | 0.056733127  | 0.198657 | 0.260429 |
| STARD7   | 0.174484544  | 6.87E-05 | 0.000179 |
| STARD8   | -0.228815116 | 1.52E-07 | 6.08E-07 |
| STAR     | -0.208076376 | 1.91E-06 | 6.41E-06 |
| STAT1    | 0.134384437  | 0.002242 | 0.004479 |
| STAT2    | -0.195313888 | 8.02E-06 | 2.43E-05 |
| STAT3    | -0.181418125 | 3.45E-05 | 9.46E-05 |
| STAT4    | -0.156207764 | 0.000373 | 0.000856 |

|         |              |          |          |
|---------|--------------|----------|----------|
| STAT5A  | -0.302458323 | 2.35E-12 | 1.93E-11 |
| STAT5B  | -0.261756775 | 1.63E-09 | 8.72E-09 |
| STAT6   | -0.305036477 | 1.50E-12 | 1.27E-11 |
| STATH   | -0.08259658  | 0.06106  | 0.091626 |
| STAU1   | 0.167809587  | 0.00013  | 0.000325 |
| STAU2   | 0.229851211  | 1.33E-07 | 5.38E-07 |
| STBD1   | 0.003824726  | 0.931    | 0.945955 |
| STC1    | 0.326542084  | 2.92E-14 | 3.21E-13 |
| STC2    | 0.359466058  | 3.74E-17 | 6.40E-16 |
| STEAP1  | 0.278126337  | 1.33E-10 | 8.42E-10 |
| STEAP2  | 0.107727471  | 0.014449 | 0.024807 |
| STEAP3  | -0.199889348 | 4.84E-06 | 1.52E-05 |
| STEAP4  | -0.224092179 | 2.77E-07 | 1.06E-06 |
| STH     | -0.038145218 | 0.387663 | 0.462493 |
| STIL    | 0.390873927  | 3.03E-20 | 8.18E-19 |
| STIM1   | -0.135949387 | 0.001988 | 0.004012 |
| STIM2   | -0.102895613 | 0.019512 | 0.032593 |
| STIP1   | 0.394411712  | 1.29E-20 | 3.66E-19 |
| STK10   | -0.230237637 | 1.27E-07 | 5.15E-07 |
| STK11IP | -0.197784238 | 6.12E-06 | 1.89E-05 |
| STK11   | -0.278436262 | 1.27E-10 | 8.04E-10 |
| STK16   | -0.029228974 | 0.508073 | 0.580539 |
| STK17A  | 0.026402608  | 0.549961 | 0.620176 |
| STK17B  | -0.073077171 | 0.097606 | 0.139215 |
| STK19   | -0.147799409 | 0.000767 | 0.001666 |
| STK24   | 0.151775153  | 0.000548 | 0.00122  |
| STK25   | 0.000947643  | 0.982884 | 0.987231 |
| STK31   | 0.075025884  | 0.088968 | 0.128137 |
| STK32A  | -0.245670533 | 1.62E-08 | 7.50E-08 |
| STK32B  | -0.122722045 | 0.005291 | 0.009893 |
| STK32C  | 0.052839801  | 0.231288 | 0.297393 |
| STK33   | -0.211600595 | 1.26E-06 | 4.36E-06 |
| STK35   | 0.064099674  | 0.146331 | 0.199459 |
| STK36   | -0.289303202 | 2.19E-11 | 1.55E-10 |
| STK38L  | 0.259195953  | 2.37E-09 | 1.24E-08 |
| STK38   | 0.00209189   | 0.962229 | 0.971071 |
| STK39   | -0.129451141 | 0.003251 | 0.006307 |
| STK3    | 0.201203712  | 4.18E-06 | 1.33E-05 |
| STK40   | -0.228604722 | 1.56E-07 | 6.24E-07 |
| STK4    | -0.104201932 | 0.01801  | 0.030302 |
| STL     | -0.259083682 | 2.41E-09 | 1.26E-08 |
| STMN1   | 0.320310467  | 9.44E-14 | 9.59E-13 |
| STMN2   | -0.097603072 | 0.026769 | 0.043468 |
| STMN3   | -0.095987472 | 0.029403 | 0.047297 |

|               |              |          |          |
|---------------|--------------|----------|----------|
| STMN4         | -0.070535677 | 0.109862 | 0.154578 |
| STOML1        | -0.14386397  | 0.001061 | 0.002245 |
| STOML2        | 0.424281279  | 6.41E-24 | 3.03E-22 |
| STOML3        | -0.179249162 | 4.29E-05 | 0.000116 |
| STOM          | -0.20948042  | 1.62E-06 | 5.50E-06 |
| STON1-GTF2A1L | 0.055135547  | 0.211616 | 0.275269 |
| STON1         | -0.099808297 | 0.023503 | 0.038582 |
| STON2         | 0.003650261  | 0.93414  | 0.948388 |
| STOX1         | 0.030750826  | 0.486231 | 0.559644 |
| STOX2         | -0.145508516 | 0.000927 | 0.001983 |
| STRA13        | 0.214340497  | 9.13E-07 | 3.23E-06 |
| STRA6         | 0.121531719  | 0.005753 | 0.010684 |
| STRA8         | -0.013907666 | 0.752865 | 0.800632 |
| STRADA        | -0.305472302 | 1.39E-12 | 1.19E-11 |
| STRADB        | -0.038860971 | 0.378813 | 0.453641 |
| STRAP         | 0.513472242  | 5.50E-36 | 1.80E-33 |
| STRBP         | 0.115658674  | 0.00861  | 0.015453 |
| STRC          | -0.207921202 | 1.94E-06 | 6.51E-06 |
| STRN3         | 0.307896346  | 9.03E-13 | 7.96E-12 |
| STRN4         | 0.041959284  | 0.341954 | 0.416132 |
| STRN          | 0.131574232  | 0.002775 | 0.00545  |
| STS           | -0.20657999  | 2.27E-06 | 7.51E-06 |
| STT3A         | 0.218368158  | 5.61E-07 | 2.06E-06 |
| STT3B         | 0.154206596  | 0.000445 | 0.001007 |
| STUB1         | -0.079202503 | 0.072519 | 0.106841 |
| STX10         | -0.078332671 | 0.075723 | 0.111143 |
| STX11         | -0.212774781 | 1.10E-06 | 3.83E-06 |
| STX12         | -0.186967373 | 1.95E-05 | 5.59E-05 |
| STX16         | -0.185285827 | 2.32E-05 | 6.56E-05 |
| STX17         | -0.193696786 | 9.56E-06 | 2.87E-05 |
| STX18         | 0.230872415  | 1.17E-07 | 4.76E-07 |
| STX19         | -0.217932485 | 5.92E-07 | 2.16E-06 |
| STX1A         | 0.134664896  | 0.002194 | 0.004396 |
| STX1B         | -0.104026471 | 0.018206 | 0.0306   |
| STX2          | 0.046576378  | 0.29143  | 0.362663 |
| STX3          | -0.046403465 | 0.293227 | 0.364507 |
| STX4          | -0.159027783 | 0.000291 | 0.000681 |
| STX5          | 0.086301555  | 0.050302 | 0.076974 |
| STX6          | -0.125947152 | 0.004201 | 0.00799  |
| STX7          | -0.048553958 | 0.271404 | 0.341355 |
| STX8          | 0.098342284  | 0.025633 | 0.04176  |
| STXBP1        | -0.327431074 | 2.47E-14 | 2.74E-13 |
| STXBP2        | -0.20771896  | 1.99E-06 | 6.65E-06 |
| STXBP3        | 0.035113073  | 0.426525 | 0.50114  |

|         |              |          |          |
|---------|--------------|----------|----------|
| STXBP4  | -0.105471875 | 0.016647 | 0.028192 |
| STXBP5L | 0.163872571  | 0.000188 | 0.000456 |
| STXBP5  | 0.148411207  | 0.000729 | 0.00159  |
| STXBP6  | -0.197206977 | 6.52E-06 | 2.01E-05 |
| STYK1   | 0.169818797  | 0.000108 | 0.000273 |
| STYXL1  | 0.15897617   | 0.000292 | 0.000684 |
| STYX    | 0.480688995  | 3.92E-31 | 5.26E-29 |
| SUB1    | 0.144237608  | 0.001029 | 0.002184 |
| SUCLA2  | 0.209842128  | 1.55E-06 | 5.28E-06 |
| SUCLG1  | 0.140335781  | 0.001409 | 0.002918 |
| SUCLG2  | 0.155464575  | 0.000399 | 0.000909 |
| SUCNR1  | -0.099437946 | 0.024026 | 0.039347 |
| SUDS3   | 0.259276356  | 2.34E-09 | 1.22E-08 |
| SUFU    | -0.22959515  | 1.38E-07 | 5.55E-07 |
| SUGT1L1 | -0.39418943  | 1.36E-20 | 3.84E-19 |
| SUGT1P1 | -0.061516859 | 0.163327 | 0.21966  |
| SUGT1   | 0.281241362  | 8.11E-11 | 5.30E-10 |
| SULF1   | 0.220958585  | 4.09E-07 | 1.53E-06 |
| SULF2   | 0.06811678   | 0.122624 | 0.170576 |
| SULT1A1 | -0.333106387 | 8.24E-15 | 9.83E-14 |
| SULT1A2 | -0.233492442 | 8.31E-08 | 3.46E-07 |
| SULT1A3 | -0.013626644 | 0.757701 | 0.804512 |
| SULT1B1 | -0.045091379 | 0.307103 | 0.378936 |
| SULT1C2 | -0.334071179 | 6.82E-15 | 8.29E-14 |
| SULT1C3 | -0.002138957 | 0.961379 | 0.97041  |
| SULT1C4 | -0.281290111 | 8.05E-11 | 5.26E-10 |
| SULT1E1 | -0.177985723 | 4.87E-05 | 0.00013  |
| SULT2A1 | 0.022421986  | 0.61169  | 0.675868 |
| SULT2B1 | 0.114631067  | 0.009223 | 0.016481 |
| SULT4A1 | -0.093012206 | 0.034839 | 0.055096 |
| SULT6B1 | 0.043664679  | 0.322676 | 0.395748 |
| SUMF1   | -0.023177104 | 0.599747 | 0.665099 |
| SUMF2   | 0.015040579  | 0.733469 | 0.784156 |
| SUMO1P1 | -0.094995103 | 0.031129 | 0.049776 |
| SUMO1P3 | 0.228220502  | 1.64E-07 | 6.53E-07 |
| SUMO1   | 0.242165506  | 2.62E-08 | 1.17E-07 |
| SUMO2   | 0.255496706  | 4.05E-09 | 2.04E-08 |
| SUMO3   | 0.065420664  | 0.138177 | 0.189664 |
| SUMO4   | -0.058068055 | 0.188281 | 0.248735 |
| SUN1    | -0.033795118 | 0.4441   | 0.518346 |
| SUN2    | -0.250907259 | 7.80E-09 | 3.80E-08 |
| SUN3    | 0.084823179  | 0.054388 | 0.082575 |
| SUOX    | -0.206182607 | 2.38E-06 | 7.84E-06 |
| SUPT16H | 0.258353438  | 2.68E-09 | 1.39E-08 |



|          |              |          |          |
|----------|--------------|----------|----------|
| SUPT3H   | 0.16948057   | 0.000111 | 0.000281 |
| SUPT4H1  | 0.148377568  | 0.000731 | 0.001595 |
| SUPT5H   | -0.01772765  | 0.688156 | 0.744795 |
| SUPT6H   | -0.180142115 | 3.93E-05 | 0.000107 |
| SUPT7L   | -0.021117914 | 0.632557 | 0.694181 |
| SUPV3L1  | 0.304236653  | 1.72E-12 | 1.45E-11 |
| SURF1    | -0.022701976 | 0.607249 | 0.671778 |
| SURF2    | 0.005889993  | 0.893923 | 0.917    |
| SURF4    | 0.198750694  | 5.50E-06 | 1.71E-05 |
| SURF6    | -0.155080106 | 0.000412 | 0.000938 |
| SUSD1    | -0.058619628 | 0.184112 | 0.243823 |
| SUSD2    | -0.469187902 | 1.50E-29 | 1.55E-27 |
| SUSD3    | -0.196578349 | 6.98E-06 | 2.14E-05 |
| SUSD4    | -0.378070273 | 6.05E-19 | 1.36E-17 |
| SUSD5    | 0.064541341  | 0.143565 | 0.196184 |
| SUV39H1  | 0.300357927  | 3.38E-12 | 2.70E-11 |
| SUV39H2  | 0.468014409  | 2.15E-29 | 2.14E-27 |
| SUV420H1 | 0.078901512  | 0.073615 | 0.108256 |
| SUV420H2 | -0.164798771 | 0.000172 | 0.000422 |
| SUZ12P   | -0.139809496 | 0.001469 | 0.003033 |
| SUZ12    | 0.209792914  | 1.56E-06 | 5.31E-06 |
| SV2A     | 0.156992537  | 0.000349 | 0.000803 |
| SV2B     | -0.081166782 | 0.065691 | 0.097819 |
| SV2C     | -0.16681246  | 0.000143 | 0.000355 |
| SVEP1    | -0.30151157  | 2.77E-12 | 2.25E-11 |
| SVIL     | -0.149912097 | 0.000642 | 0.001414 |
| SVIP     | -0.012942793 | 0.769509 | 0.814672 |
| SVOPL    | -0.046445044 | 0.292794 | 0.364043 |
| SVOP     | 0.054595537  | 0.216131 | 0.280466 |
| SWAP70   | -0.191013374 | 1.27E-05 | 3.76E-05 |
| SYAP1    | 0.177432006  | 5.14E-05 | 0.000137 |
| SYBU     | -0.212654797 | 1.12E-06 | 3.88E-06 |
| SYCE1L   | -0.086961718 | 0.048562 | 0.074482 |
| SYCE1    | -0.07130506  | 0.106031 | 0.149713 |
| SYCE2    | 0.228213585  | 1.64E-07 | 6.53E-07 |
| SYCN     | -0.061363444 | 0.164382 | 0.220885 |
| SYCP1    | -0.024481571 | 0.579368 | 0.646553 |
| SYCP2L   | 0.074420093  | 0.091585 | 0.131442 |
| SYCP2    | -0.103810167 | 0.018449 | 0.030968 |
| SYCP3    | -0.165060495 | 0.000168 | 0.000412 |
| SYDE1    | -0.075876044 | 0.085396 | 0.123572 |
| SYDE2    | -0.187298035 | 1.89E-05 | 5.41E-05 |
| SYF2     | -0.194962175 | 8.33E-06 | 2.52E-05 |
| SYK      | -0.207534624 | 2.03E-06 | 6.78E-06 |

|             |              |          |          |
|-------------|--------------|----------|----------|
| SYMPK       | -0.059588898 | 0.176951 | 0.235834 |
| SYN1        | -0.046905439 | 0.28803  | 0.35897  |
| SYN2        | -0.094055303 | 0.032843 | 0.052226 |
| SYN3        | -0.084202669 | 0.056183 | 0.084966 |
| SYNCRIP     | 0.207546285  | 2.03E-06 | 6.77E-06 |
| SYNC        | -0.206735695 | 2.23E-06 | 7.39E-06 |
| SYNE1       | -0.414049251 | 9.47E-23 | 3.72E-21 |
| SYNE2       | -0.200863207 | 4.35E-06 | 1.38E-05 |
| SYNGAP1     | -0.256017221 | 3.76E-09 | 1.91E-08 |
| SYNGR1      | -0.280546882 | 9.07E-11 | 5.88E-10 |
| SYNGR2      | -0.085789219 | 0.051688 | 0.078837 |
| SYNGR3      | 0.102778437  | 0.019652 | 0.032805 |
| SYNGR4      | 0.171554676  | 9.12E-05 | 0.000234 |
| SYNJ1       | -0.373770137 | 1.61E-18 | 3.37E-17 |
| SYNJ2BP     | -0.079262817 | 0.072301 | 0.106567 |
| SYNJ2       | 0.118341487  | 0.007177 | 0.01309  |
| SYNM        | -0.198117842 | 5.90E-06 | 1.83E-05 |
| SYNPO2L     | -0.051524641 | 0.243124 | 0.310455 |
| SYNPO2      | -0.279636118 | 1.05E-10 | 6.73E-10 |
| SYNPO       | -0.353271408 | 1.39E-16 | 2.16E-15 |
| SYNPR       | -0.007674262 | 0.862073 | 0.89151  |
| SYNRG       | -0.207395648 | 2.07E-06 | 6.88E-06 |
| SYPL1       | 0.137053352  | 0.001825 | 0.003702 |
| SYPL2       | -0.091416584 | 0.038091 | 0.059723 |
| SYP         | -0.216211115 | 7.29E-07 | 2.62E-06 |
| SYS1-DBNDD2 | -0.065477365 | 0.137835 | 0.189247 |
| SYS1        | -0.06923238  | 0.116602 | 0.163073 |
| SYT10       | -0.020753533 | 0.638442 | 0.699626 |
| SYT11       | -0.104363223 | 0.017832 | 0.030017 |
| SYT12       | 0.01919972   | 0.663786 | 0.72229  |
| SYT13       | 0.161056416  | 0.000242 | 0.000577 |
| SYT14L      | -0.108995206 | 0.013329 | 0.02304  |
| SYT14       | 0.057924613  | 0.189376 | 0.249868 |
| SYT15       | -0.423224769 | 8.49E-24 | 3.91E-22 |
| SYT16       | -0.049237496 | 0.264706 | 0.334003 |
| SYT17       | -0.120059035 | 0.006375 | 0.011737 |
| SYT1        | 0.160357096  | 0.000258 | 0.000611 |
| SYT2        | -0.289781456 | 2.02E-11 | 1.44E-10 |
| SYT3        | -0.167035582 | 0.00014  | 0.000348 |
| SYT4        | -0.029494409 | 0.504227 | 0.57687  |
| SYT5        | 0.164503266  | 0.000177 | 0.000433 |
| SYT6        | -0.141198607 | 0.001315 | 0.002738 |
| SYT7        | 0.116823356  | 0.007959 | 0.014402 |
| SYT8        | -0.255689265 | 3.94E-09 | 1.99E-08 |

|         |              |          |          |
|---------|--------------|----------|----------|
| SYT9    | -0.008014759 | 0.856018 | 0.886579 |
| SYTL1   | -0.32528628  | 3.71E-14 | 4.02E-13 |
| SYTL2   | -0.226221186 | 2.12E-07 | 8.28E-07 |
| SYTL3   | -0.167861531 | 0.00013  | 0.000324 |
| SYTL4   | -0.091461012 | 0.037997 | 0.059609 |
| SYTL5   | -0.033344431 | 0.450203 | 0.524519 |
| SYVN1   | -0.109676045 | 0.012759 | 0.022137 |
| TAAR1   | 0.028588685  | 0.517414 | 0.589594 |
| TAAR6   | 0.015455254  | 0.726411 | 0.777983 |
| TAAR8   | 0.084808085  | 0.054431 | 0.082628 |
| TAAR9   | 0.003060061  | 0.944771 | 0.956156 |
| TAB1    | -0.172070045 | 8.68E-05 | 0.000223 |
| TAB2    | 0.058538123  | 0.184723 | 0.244504 |
| TAB3    | -0.140033664 | 0.001443 | 0.002983 |
| TAC1    | 0.11200313   | 0.010972 | 0.019311 |
| TAC3    | 0.044986265  | 0.308233 | 0.380119 |
| TAC4    | -0.067783009 | 0.124472 | 0.172618 |
| TACC1   | -0.312591877 | 3.89E-13 | 3.62E-12 |
| TACC2   | 0.034038482  | 0.440824 | 0.515154 |
| TACC3   | 0.385385676  | 1.11E-19 | 2.79E-18 |
| TACO1   | 0.367739969  | 6.17E-18 | 1.19E-16 |
| TACR1   | -0.150761498 | 0.000598 | 0.001322 |
| TACR2   | -0.061217252 | 0.165391 | 0.222107 |
| TACR3   | 0.151009332  | 0.000585 | 0.001296 |
| TACSTD2 | -0.131640019 | 0.002761 | 0.005426 |
| TADA1   | 0.174024412  | 7.19E-05 | 0.000187 |
| TADA2A  | 0.135683399  | 0.002029 | 0.00409  |
| TADA2B  | -0.141605307 | 0.001273 | 0.002658 |
| TADA3   | -0.070436357 | 0.110365 | 0.155219 |
| TAF10   | 0.137641656  | 0.001743 | 0.003549 |
| TAF11   | 0.192500979  | 1.09E-05 | 3.24E-05 |
| TAF12   | 0.053349439  | 0.226813 | 0.292241 |
| TAF13   | 0.315544636  | 2.27E-13 | 2.19E-12 |
| TAF15   | -0.082337962 | 0.061877 | 0.092706 |
| TAF1A   | 0.316334752  | 1.97E-13 | 1.91E-12 |
| TAF1B   | 0.128330252  | 0.003531 | 0.006805 |
| TAF1C   | -0.276381324 | 1.75E-10 | 1.09E-09 |
| TAF1D   | 0.266809485  | 7.65E-10 | 4.33E-09 |
| TAF1L   | -0.105478676 | 0.01664  | 0.028182 |
| TAF1    | -0.257344178 | 3.10E-09 | 1.59E-08 |
| TAF2    | 0.323329036  | 5.37E-14 | 5.65E-13 |
| TAF3    | 0.001238178  | 0.977638 | 0.983493 |
| TAF4B   | -0.03735725  | 0.397549 | 0.472314 |
| TAF4    | 0.116586449  | 0.008088 | 0.014618 |

|         |              |          |          |
|---------|--------------|----------|----------|
| TAF5L   | 0.168755172  | 0.000119 | 0.000299 |
| TAF5    | 0.293699938  | 1.05E-11 | 7.83E-11 |
| TAF6L   | -0.157253377 | 0.000341 | 0.000787 |
| TAF6    | 0.148340708  | 0.000733 | 0.001599 |
| TAF7L   | 0.021491987  | 0.626541 | 0.689267 |
| TAF7    | 0.069776725  | 0.113749 | 0.159574 |
| TAF8    | -0.110216219 | 0.012323 | 0.021445 |
| TAF9B   | -0.044945656 | 0.308671 | 0.380588 |
| TAF9    | 0.285938009  | 3.80E-11 | 2.60E-10 |
| TAGAP   | -0.242865713 | 2.38E-08 | 1.08E-07 |
| TAGLN2  | -0.020339941 | 0.645148 | 0.705621 |
| TAGLN3  | 0.091459364  | 0.038    | 0.05961  |
| TAGLN   | -0.022877164 | 0.604478 | 0.669343 |
| TAL1    | -0.333676418 | 7.37E-15 | 8.90E-14 |
| TAL2    | 0.033601806  | 0.446712 | 0.521035 |
| TALDO1  | 0.169400736  | 0.000112 | 0.000283 |
| TANC1   | -0.244401741 | 1.93E-08 | 8.85E-08 |
| TANC2   | -0.123099953 | 0.005151 | 0.009658 |
| TANK    | 0.027003445  | 0.540916 | 0.611667 |
| TAOK1   | 0.075250063  | 0.088014 | 0.126929 |
| TAOK2   | -0.329808458 | 1.56E-14 | 1.80E-13 |
| TAOK3   | -0.1545906   | 0.00043  | 0.000977 |
| TAP1    | 0.115550952  | 0.008673 | 0.01556  |
| TAP2    | 0.073317122  | 0.096508 | 0.137795 |
| TAPBPL  | 0.050997707  | 0.247983 | 0.315813 |
| TAPBP   | -0.171103259 | 9.53E-05 | 0.000243 |
| TAPT1   | -0.423365239 | 8.18E-24 | 3.78E-22 |
| TARBP1  | -0.135297449 | 0.00209  | 0.004204 |
| TARBP2  | 0.265007859  | 1.00E-09 | 5.58E-09 |
| TARDBP  | 0.061867105  | 0.160939 | 0.216828 |
| TARM1   | 0.024458291  | 0.579729 | 0.646847 |
| TARP    | -0.145294939 | 0.000944 | 0.002014 |
| TARS2   | 0.063043404  | 0.153111 | 0.20747  |
| TARSL2  | -0.184288153 | 2.58E-05 | 7.22E-05 |
| TARS    | 0.405710532  | 7.94E-22 | 2.74E-20 |
| TAS1R1  | -0.14688933  | 0.000827 | 0.001785 |
| TAS1R2  | -0.126772236 | 0.003957 | 0.007565 |
| TAS1R3  | 0.118398624  | 0.007149 | 0.013042 |
| TAS2R10 | -0.191438141 | 1.22E-05 | 3.60E-05 |
| TAS2R13 | -0.04164715  | 0.34556  | 0.419805 |
| TAS2R14 | -0.159754177 | 0.000273 | 0.000642 |
| TAS2R19 | -0.008509908 | 0.847229 | 0.879299 |
| TAS2R1  | 0.01920316   | 0.663729 | 0.722268 |
| TAS2R20 | -0.04628968  | 0.294413 | 0.365761 |

|          |              |          |          |
|----------|--------------|----------|----------|
| TAS2R30  | 0.048076988  | 0.276145 | 0.346578 |
| TAS2R31  | -0.013278753 | 0.763701 | 0.809893 |
| TAS2R38  | -0.031059666 | 0.481861 | 0.55567  |
| TAS2R39  | 0.050266645  | 0.254837 | 0.323326 |
| TAS2R3   | -0.095607325 | 0.030054 | 0.048263 |
| TAS2R40  | 0.030193879  | 0.494165 | 0.567513 |
| TAS2R41  | -0.074682869 | 0.090442 | 0.130026 |
| TAS2R42  | -0.011794467 | 0.789455 | 0.831076 |
| TAS2R43  | -0.064857891 | 0.141607 | 0.1938   |
| TAS2R46  | 0.00411351   | 0.925805 | 0.942113 |
| TAS2R4   | -0.240582381 | 3.24E-08 | 1.44E-07 |
| TAS2R50  | -0.036368368 | 0.410169 | 0.484817 |
| TAS2R5   | -0.128101431 | 0.003591 | 0.006908 |
| TAS2R60  | 0.039685696  | 0.368771 | 0.443475 |
| TAS2R7   | 0.024831763  | 0.573953 | 0.641761 |
| TAS2R8   | -0.039855002 | 0.36673  | 0.441445 |
| TAS2R9   | 0.042927076  | 0.330925 | 0.40446  |
| TASP1    | -0.014959922 | 0.734844 | 0.785374 |
| TATDN1   | 0.324377121  | 4.40E-14 | 4.72E-13 |
| TATDN2   | 0.00682967   | 0.877125 | 0.903989 |
| TATDN3   | 0.049779852  | 0.259472 | 0.328291 |
| TAT      | 0.08067023   | 0.067365 | 0.100036 |
| TAX1BP1  | 0.090145396  | 0.040863 | 0.06372  |
| TAX1BP3  | -0.027644717 | 0.531345 | 0.602857 |
| TAZ      | -0.047569135 | 0.281256 | 0.351931 |
| TBC1D10A | -0.236811435 | 5.37E-08 | 2.30E-07 |
| TBC1D10B | 0.014005704  | 0.75118  | 0.799159 |
| TBC1D10C | -0.258350388 | 2.68E-09 | 1.39E-08 |
| TBC1D12  | -0.042652205 | 0.334034 | 0.40781  |
| TBC1D13  | -0.151449827 | 0.000564 | 0.001252 |
| TBC1D14  | -0.05978524  | 0.175526 | 0.234113 |
| TBC1D15  | 0.111045875  | 0.011679 | 0.020424 |
| TBC1D16  | 0.049784675  | 0.259426 | 0.328274 |
| TBC1D17  | -0.453003738 | 2.00E-27 | 1.55E-25 |
| TBC1D19  | -0.021435042 | 0.627455 | 0.690078 |
| TBC1D1   | -0.024711116 | 0.575816 | 0.643415 |
| TBC1D20  | -0.253405941 | 5.47E-09 | 2.71E-08 |
| TBC1D22A | -0.243941424 | 2.05E-08 | 9.38E-08 |
| TBC1D22B | -0.02617175  | 0.553456 | 0.623168 |
| TBC1D23  | 0.151487928  | 0.000562 | 0.001249 |
| TBC1D24  | -0.220229761 | 4.47E-07 | 1.66E-06 |
| TBC1D25  | -0.152748608 | 0.000504 | 0.00113  |
| TBC1D26  | -0.109650213 | 0.012781 | 0.022168 |
| TBC1D28  | 0.068893893  | 0.118404 | 0.1652   |

|          |              |          |          |
|----------|--------------|----------|----------|
| TBC1D29  | -0.116980358 | 0.007875 | 0.01426  |
| TBC1D2B  | -0.320881083 | 8.49E-14 | 8.66E-13 |
| TBC1D2   | -0.156950915 | 0.00035  | 0.000806 |
| TBC1D3B  | -0.219396227 | 4.95E-07 | 1.83E-06 |
| TBC1D3C  | -0.106274989 | 0.015833 | 0.026936 |
| TBC1D3G  | -0.072837594 | 0.098713 | 0.140643 |
| TBC1D3H  | -0.224374559 | 2.67E-07 | 1.03E-06 |
| TBC1D3P2 | 0.035551473  | 0.42077  | 0.495397 |
| TBC1D3   | -0.177081489 | 5.33E-05 | 0.000141 |
| TBC1D4   | -0.128907543 | 0.003384 | 0.006544 |
| TBC1D5   | -0.146727425 | 0.000838 | 0.001807 |
| TBC1D7   | 0.266440941  | 8.09E-10 | 4.56E-09 |
| TBC1D8B  | -0.141382843 | 0.001296 | 0.002702 |
| TBC1D8   | -0.194384201 | 8.87E-06 | 2.68E-05 |
| TBC1D9B  | -0.269000908 | 5.49E-10 | 3.17E-09 |
| TBC1D9   | -0.265504978 | 9.31E-10 | 5.21E-09 |
| TBCA     | 0.252142573  | 6.55E-09 | 3.21E-08 |
| TBCB     | 0.089615919  | 0.042067 | 0.065404 |
| TBCCD1   | 0.120839826  | 0.006038 | 0.011165 |
| TBCC     | -0.001196921 | 0.978383 | 0.983995 |
| TBCD     | -0.257257925 | 3.14E-09 | 1.61E-08 |
| TBCEL    | -0.20340177  | 3.26E-06 | 1.05E-05 |
| TBCE     | 0.284305823  | 4.95E-11 | 3.32E-10 |
| TBCK     | -0.127015114 | 0.003888 | 0.007437 |
| TBK1     | 0.210377858  | 1.46E-06 | 4.98E-06 |
| TBKBP1   | -0.088421411 | 0.044893 | 0.069383 |
| TBL1XR1  | 0.142791725  | 0.001157 | 0.002433 |
| TBL1X    | 0.127501787  | 0.003752 | 0.007196 |
| TBL1Y    | -0.016168144 | 0.714331 | 0.767687 |
| TBL2     | 0.321803642  | 7.15E-14 | 7.41E-13 |
| TBL3     | -0.103756169 | 0.018511 | 0.031063 |
| TBPL1    | 0.169776174  | 0.000108 | 0.000274 |
| TBPL2    | 0.043272725  | 0.327043 | 0.400302 |
| TBP      | 0.133110579  | 0.002471 | 0.004897 |
| TBR1     | 0.088645041  | 0.044352 | 0.068606 |
| TBRG1    | -0.269556332 | 5.04E-10 | 2.93E-09 |
| TBRG4    | 0.387128518  | 7.37E-20 | 1.88E-18 |
| TBX10    | 0.169101431  | 0.000115 | 0.00029  |
| TBX15    | 0.111268551  | 0.011511 | 0.020171 |
| TBX18    | 0.089664573  | 0.041955 | 0.065255 |
| TBX19    | -0.285528236 | 4.06E-11 | 2.77E-10 |
| TBX1     | -0.06706089  | 0.128544 | 0.177686 |
| TBX20    | 0.046817252  | 0.288939 | 0.360012 |
| TBX21    | -0.103731157 | 0.018539 | 0.031108 |

|         |              |          |          |
|---------|--------------|----------|----------|
| TBX22   | -0.101609171 | 0.021097 | 0.034997 |
| TBX2    | -0.356654934 | 6.81E-17 | 1.12E-15 |
| TBX3    | -0.224183945 | 2.74E-07 | 1.05E-06 |
| TBX4    | -0.388558604 | 5.25E-20 | 1.37E-18 |
| TBX5    | -0.314034077 | 3.00E-13 | 2.84E-12 |
| TBX6    | -0.17642993  | 5.68E-05 | 0.00015  |
| TBXA2R  | 0.029011944  | 0.51123  | 0.583512 |
| TBXAS1  | -0.119838499 | 0.006474 | 0.011906 |
| TC2N    | 0.100707546  | 0.022273 | 0.036763 |
| TCAM1P  | 0.050803153  | 0.249794 | 0.317776 |
| TCAP    | -0.197916212 | 6.03E-06 | 1.87E-05 |
| TCEA1   | 0.27284634   | 3.04E-10 | 1.82E-09 |
| TCEA2   | -0.210242818 | 1.48E-06 | 5.06E-06 |
| TCEA3   | -0.355546601 | 8.61E-17 | 1.38E-15 |
| TCEAL1  | -0.047802814 | 0.278897 | 0.349416 |
| TCEAL2  | -0.356492028 | 7.05E-17 | 1.15E-15 |
| TCEAL3  | -0.29918328  | 4.14E-12 | 3.26E-11 |
| TCEAL4  | -0.253430802 | 5.45E-09 | 2.71E-08 |
| TCEAL5  | -0.232147424 | 9.91E-08 | 4.08E-07 |
| TCEAL6  | -0.312106025 | 4.25E-13 | 3.93E-12 |
| TCEAL7  | -0.127566863 | 0.003734 | 0.007165 |
| TCEAL8  | -0.10799142  | 0.014209 | 0.024445 |
| TCEANC  | -0.266324729 | 8.23E-10 | 4.63E-09 |
| TCEB1   | 0.428396042  | 2.11E-24 | 1.07E-22 |
| TCEB2   | -0.008738246 | 0.843183 | 0.875807 |
| TCEB3B  | 0.092716421  | 0.035423 | 0.055962 |
| TCEB3C  | -0.044380787 | 0.314797 | 0.38709  |
| TCEB3   | -0.268899236 | 5.57E-10 | 3.22E-09 |
| TCERG1L | -0.052913735 | 0.230635 | 0.296649 |
| TCERG1  | 0.12420593   | 0.004761 | 0.008983 |
| TCF12   | 0.090122236  | 0.040915 | 0.063797 |
| TCF15   | -0.051106366 | 0.246976 | 0.314711 |
| TCF19   | 0.17051886   | 0.000101 | 0.000256 |
| TCF20   | -0.115236063 | 0.008858 | 0.015868 |
| TCF21   | -0.401918642 | 2.05E-21 | 6.69E-20 |
| TCF23   | -0.061025139 | 0.166725 | 0.223672 |
| TCF25   | -0.191226032 | 1.25E-05 | 3.68E-05 |
| TCF3    | 0.106894262  | 0.015229 | 0.026017 |
| TCF4    | -0.186415848 | 2.07E-05 | 5.89E-05 |
| TCF7L1  | -0.25192943  | 6.75E-09 | 3.31E-08 |
| TCF7L2  | -0.17559896  | 6.16E-05 | 0.000162 |
| TCF7    | -0.126023726 | 0.004178 | 0.007951 |
| TCFL5   | 0.002389859  | 0.956853 | 0.967062 |
| TCHHL1  | -0.001512929 | 0.972677 | 0.979538 |

|          |              |          |          |
|----------|--------------|----------|----------|
| TCHH     | -0.160717495 | 0.00025  | 0.000593 |
| TCHP     | -0.022261495 | 0.614241 | 0.678088 |
| TCIRG1   | -0.217699449 | 6.09E-07 | 2.22E-06 |
| TCL1A    | -0.096384259 | 0.028736 | 0.046317 |
| TCL1B    | -0.010247587 | 0.816541 | 0.85361  |
| TCL6     | 0.013128113  | 0.766304 | 0.811964 |
| TCN1     | 0.047752338  | 0.279405 | 0.349943 |
| TCN2     | -0.131255409 | 0.002842 | 0.005573 |
| TCOF1    | 0.13336924   | 0.002423 | 0.004812 |
| TCP10L2  | -0.007126757 | 0.871825 | 0.900152 |
| TCP10L   | -0.068982829 | 0.117928 | 0.164629 |
| TCP10    | 0.048898244  | 0.268016 | 0.337668 |
| TCP11L1  | 0.047781463  | 0.279112 | 0.34962  |
| TCP11L2  | -0.082099667 | 0.062638 | 0.093706 |
| TCP11    | -0.026263481 | 0.552066 | 0.621953 |
| TCP1     | 0.363828647  | 1.46E-17 | 2.64E-16 |
| TCTA     | -0.217788221 | 6.02E-07 | 2.19E-06 |
| TCTE1    | -0.263075709 | 1.34E-09 | 7.27E-09 |
| TCTE3    | -0.147680088 | 0.000775 | 0.001681 |
| TCTEX1D1 | -0.23115252  | 1.13E-07 | 4.61E-07 |
| TCTEX1D2 | 0.06111519   | 0.166099 | 0.222967 |
| TCTEX1D4 | -0.332414244 | 9.43E-15 | 1.12E-13 |
| TCTN1    | -0.101096775 | 0.021758 | 0.035985 |
| TCTN2    | -0.101715231 | 0.020962 | 0.034803 |
| TCTN3    | 0.207964617  | 1.93E-06 | 6.48E-06 |
| TDGF1    | -0.014080366 | 0.749898 | 0.798177 |
| TDGF3    | 0.016793851  | 0.703787 | 0.758917 |
| TDG      | 0.436474049  | 2.29E-25 | 1.35E-23 |
| TDH      | -0.136220218 | 0.001947 | 0.003932 |
| TDO2     | 0.146105182  | 0.000883 | 0.001895 |
| TDP1     | 0.200127587  | 4.72E-06 | 1.49E-05 |
| TDP2     | 0.243638689  | 2.14E-08 | 9.75E-08 |
| TDRD10   | -0.354603604 | 1.05E-16 | 1.66E-15 |
| TDRD12   | 0.094611207  | 0.03182  | 0.050767 |
| TDRD1    | -0.066716531 | 0.130522 | 0.180184 |
| TDRD3    | -0.213489034 | 1.01E-06 | 3.55E-06 |
| TDRD5    | 0.100927262  | 0.021981 | 0.036326 |
| TDRD6    | -0.296322547 | 6.74E-12 | 5.18E-11 |
| TDRD7    | 0.023849934  | 0.589195 | 0.655434 |
| TDRD9    | -0.050040884 | 0.256979 | 0.325714 |
| TDRG1    | 0.116638788  | 0.008059 | 0.014572 |
| TDRKH    | -0.021347345 | 0.628864 | 0.691214 |
| TEAD1    | 0.047392678  | 0.283046 | 0.353817 |
| TEAD2    | 0.001212192  | 0.978107 | 0.983767 |



|         |              |          |          |
|---------|--------------|----------|----------|
| TEAD3   | -0.112362302 | 0.010717 | 0.018903 |
| TEAD4   | 0.417065733  | 4.32E-23 | 1.79E-21 |
| TECPR1  | -0.182843398 | 2.99E-05 | 8.27E-05 |
| TECPR2  | -0.140537446 | 0.001387 | 0.002875 |
| TECRL   | 0.041543079  | 0.346767 | 0.421144 |
| TECR    | -0.106185369 | 0.015922 | 0.027073 |
| TECTA   | -0.37073135  | 3.18E-18 | 6.38E-17 |
| TECTB   | 0.027419125  | 0.534702 | 0.605909 |
| TEC     | -0.050554181 | 0.252126 | 0.320313 |
| TEDDM1  | -0.226274106 | 2.10E-07 | 8.23E-07 |
| TEF     | -0.477243832 | 1.18E-30 | 1.46E-28 |
| TEKT1   | -0.202085339 | 3.79E-06 | 1.21E-05 |
| TEKT2   | -0.250994127 | 7.70E-09 | 3.75E-08 |
| TEKT3   | -0.280138705 | 9.68E-11 | 6.25E-10 |
| TEKT4   | -0.264522642 | 1.08E-09 | 5.97E-09 |
| TEKT5   | -0.151958331 | 0.00054  | 0.001203 |
| TEK     | -0.269092203 | 5.41E-10 | 3.13E-09 |
| TELO2   | -0.169515848 | 0.000111 | 0.00028  |
| TENC1   | -0.443821209 | 2.88E-26 | 1.94E-24 |
| TEP1    | -0.259975377 | 2.11E-09 | 1.11E-08 |
| TEPP    | -0.391582711 | 2.55E-20 | 7.02E-19 |
| TERC    | 0.117794864  | 0.00745  | 0.013548 |
| TERF1   | 0.242213962  | 2.60E-08 | 1.17E-07 |
| TERF2IP | -0.298835256 | 4.39E-12 | 3.44E-11 |
| TERF2   | -0.018771189 | 0.670845 | 0.728666 |
| TERT    | 0.159295529  | 0.000284 | 0.000667 |
| TESC    | 0.034371413  | 0.436365 | 0.510811 |
| TESK1   | -0.071411754 | 0.105508 | 0.149069 |
| TESK2   | -0.308404745 | 8.25E-13 | 7.32E-12 |
| TES     | 0.212984427  | 1.07E-06 | 3.75E-06 |
| TET1    | 0.15764769   | 0.000329 | 0.000762 |
| TET2    | -0.305099368 | 1.48E-12 | 1.26E-11 |
| TET3    | -0.072213852 | 0.101641 | 0.14427  |
| TEX101  | 0.061098284  | 0.166216 | 0.223065 |
| TEX10   | 0.398850937  | 4.37E-21 | 1.35E-19 |
| TEX11   | 0.076527038  | 0.082741 | 0.120138 |
| TEX12   | -0.07570354  | 0.086112 | 0.124445 |
| TEX13A  | 0.204567933  | 2.86E-06 | 9.31E-06 |
| TEX13B  | -0.021788169 | 0.621794 | 0.684887 |
| TEX14   | -0.1280271   | 0.003611 | 0.006943 |
| TEX15   | 0.203916296  | 3.08E-06 | 9.97E-06 |
| TEX19   | 0.281105318  | 8.29E-11 | 5.41E-10 |
| TEX261  | -0.107087969 | 0.015045 | 0.025755 |
| TEX264  | -0.081115048 | 0.065863 | 0.098062 |

|          |              |          |          |
|----------|--------------|----------|----------|
| TEX2     | -0.148873207 | 0.000701 | 0.001535 |
| TEX9     | -0.16198331  | 0.000223 | 0.000535 |
| TFAMP1   | 0.034035667  | 0.440862 | 0.515168 |
| TFAM     | 0.449789305  | 5.14E-27 | 3.76E-25 |
| TFAP2A   | 0.088319788  | 0.045141 | 0.069722 |
| TFAP2B   | -0.040564838 | 0.35825  | 0.432802 |
| TFAP2C   | -0.12837521  | 0.003519 | 0.006785 |
| TFAP2D   | -0.007597109 | 0.863446 | 0.892653 |
| TFAP2E   | -0.21915843  | 5.10E-07 | 1.88E-06 |
| TFAP4    | 0.058921292  | 0.181861 | 0.241242 |
| TFB1M    | 0.073970904  | 0.093565 | 0.133938 |
| TFB2M    | 0.294103384  | 9.81E-12 | 7.35E-11 |
| TFCP2L1  | -0.18491132  | 2.42E-05 | 6.80E-05 |
| TFCP2    | 0.198319326  | 5.77E-06 | 1.79E-05 |
| TFDP1    | 0.205159565  | 2.67E-06 | 8.73E-06 |
| TFDP2    | 0.117853459  | 0.007421 | 0.013503 |
| TFDP3    | -0.052337299 | 0.235761 | 0.302367 |
| TFE3     | -0.061323173 | 0.164659 | 0.221213 |
| TFEB     | -0.440851678 | 6.69E-26 | 4.27E-24 |
| TFEC     | -0.136179936 | 0.001953 | 0.003944 |
| TFF1     | 0.20782874   | 1.97E-06 | 6.58E-06 |
| TFF2     | 0.030517158  | 0.489551 | 0.562818 |
| TFF3     | 0.010418863  | 0.813531 | 0.85122  |
| TFG      | 0.328375873  | 2.06E-14 | 2.32E-13 |
| TFIP11   | 0.02581476   | 0.558881 | 0.628286 |
| TFPI2    | 0.05105413   | 0.24746  | 0.315247 |
| TFPI     | -0.078502797 | 0.075087 | 0.110275 |
| TFPT     | -0.010662482 | 0.809254 | 0.847499 |
| TFR2     | 0.15244933   | 0.000517 | 0.001157 |
| TFRC     | 0.183477915  | 2.80E-05 | 7.79E-05 |
| TF       | 0.092432288  | 0.035992 | 0.056767 |
| TGDS     | 0.100493145  | 0.022561 | 0.037179 |
| TGFA     | 0.001848765  | 0.966616 | 0.974416 |
| TGFB1I1  | -0.103669394 | 0.01861  | 0.031215 |
| TGFB1    | -0.237872874 | 4.66E-08 | 2.01E-07 |
| TGFB2    | -0.175846322 | 6.02E-05 | 0.000158 |
| TGFB3    | -0.018434615 | 0.67641  | 0.73391  |
| TGFB1    | 0.126633721  | 0.003997 | 0.007632 |
| TGFBR1   | 0.137726768  | 0.001731 | 0.003528 |
| TGFBR2   | -0.252567354 | 6.16E-09 | 3.03E-08 |
| TGFBR3   | -0.387657865 | 6.50E-20 | 1.66E-18 |
| TGFBRAP1 | -0.007388371 | 0.867163 | 0.895939 |
| TGIF1    | 0.248517732  | 1.09E-08 | 5.19E-08 |
| TGIF2LX  | 0.121821113  | 0.005637 | 0.010491 |

|         |              |          |          |
|---------|--------------|----------|----------|
| TGIF2LY | 0.154236399  | 0.000444 | 0.001005 |
| TGIF2   | 0.069747662  | 0.1139   | 0.159741 |
| TGM1    | -0.240031762 | 3.49E-08 | 1.54E-07 |
| TGM2    | -0.005208457 | 0.906137 | 0.926628 |
| TGM3    | 0.075126353  | 0.088539 | 0.127603 |
| TGM4    | 0.170290212  | 0.000103 | 0.000262 |
| TGM5    | 0.061988545  | 0.160117 | 0.21588  |
| TGM6    | 0.048384191  | 0.273085 | 0.34319  |
| TGM7    | -0.046551099 | 0.291692 | 0.362944 |
| TGOLN2  | -0.16467842  | 0.000174 | 0.000426 |
| TGS1    | 0.242452326  | 2.52E-08 | 1.14E-07 |
| TG      | -0.155433367 | 0.0004   | 0.000911 |
| TH1L    | 0.147792669  | 0.000767 | 0.001667 |
| THADA   | -0.078898221 | 0.073627 | 0.108266 |
| THAP10  | 0.023030195  | 0.602062 | 0.667296 |
| THAP11  | 0.050273311  | 0.254774 | 0.323287 |
| THAP1   | 0.286528895  | 3.45E-11 | 2.38E-10 |
| THAP2   | -0.06891806  | 0.118275 | 0.165054 |
| THAP3   | -0.035010613 | 0.427877 | 0.502481 |
| THAP4   | 0.13056399   | 0.002993 | 0.005844 |
| THAP5   | 0.120857974  | 0.006031 | 0.011154 |
| THAP6   | -0.037861872 | 0.391201 | 0.466046 |
| THAP7   | -0.068948319 | 0.118113 | 0.16484  |
| THAP8   | -0.099221825 | 0.024336 | 0.039813 |
| THAP9   | -0.037453946 | 0.396328 | 0.471199 |
| THBD    | -0.184128557 | 2.62E-05 | 7.33E-05 |
| THBS1   | 0.032591451  | 0.460504 | 0.534403 |
| THBS2   | 0.132631058  | 0.002562 | 0.005066 |
| THBS3   | -0.220227947 | 4.47E-07 | 1.66E-06 |
| THBS4   | -0.273812594 | 2.62E-10 | 1.58E-09 |
| THEG    | 0.074390683  | 0.091713 | 0.131589 |
| THEM4   | -0.034371294 | 0.436367 | 0.510811 |
| THEM5   | 0.122167408  | 0.005502 | 0.010259 |
| THEMIS  | -0.094499479 | 0.032023 | 0.051043 |
| THG1L   | -0.026166441 | 0.553536 | 0.623223 |
| THNSL1  | 0.092124162  | 0.036618 | 0.057627 |
| THNSL2  | -0.128956485 | 0.003372 | 0.006522 |
| THOC1   | 0.007033677  | 0.873485 | 0.901214 |
| THOC2   | -0.067428649 | 0.126458 | 0.175093 |
| THOC3   | 0.204315191  | 2.94E-06 | 9.56E-06 |
| THOC4   | 0.374688504  | 1.31E-18 | 2.80E-17 |
| THOC5   | 0.11892651   | 0.006894 | 0.01262  |
| THOC6   | 0.017103358  | 0.698592 | 0.75421  |
| THOC7   | 0.186538576  | 2.04E-05 | 5.82E-05 |

|          |              |          |          |
|----------|--------------|----------|----------|
| THOP1    | 0.30583394   | 1.30E-12 | 1.12E-11 |
| THPO     | 0.172679947  | 8.19E-05 | 0.000211 |
| THRAP3   | -0.107346815 | 0.014801 | 0.025379 |
| THRA     | -0.397553529 | 6.01E-21 | 1.80E-19 |
| THRB     | -0.257010765 | 3.26E-09 | 1.66E-08 |
| THRSP    | -0.045740129 | 0.300189 | 0.371712 |
| THSD1P1  | -0.303088312 | 2.10E-12 | 1.75E-11 |
| THSD1    | -0.320197488 | 9.64E-14 | 9.78E-13 |
| THSD4    | -0.133204621 | 0.002453 | 0.004867 |
| THSD7A   | 0.01313102   | 0.766254 | 0.811953 |
| THSD7B   | -0.316289151 | 1.98E-13 | 1.93E-12 |
| THTPA    | -0.039059967 | 0.376375 | 0.451153 |
| THUMPD1  | -0.217507024 | 6.23E-07 | 2.26E-06 |
| THUMPD2  | 0.104996489  | 0.017146 | 0.028963 |
| THUMPD3  | 0.242290684  | 2.57E-08 | 1.16E-07 |
| THY1     | 0.11796837   | 0.007363 | 0.013409 |
| THYN1    | -0.158085834 | 0.000316 | 0.000735 |
| TH       | 0.162044894  | 0.000222 | 0.000532 |
| TIA1     | -0.156296962 | 0.000371 | 0.00085  |
| TIAF1    | -0.164130364 | 0.000183 | 0.000447 |
| TIAL1    | 0.252364074  | 6.35E-09 | 3.12E-08 |
| TIAM1    | -0.252835589 | 5.93E-09 | 2.93E-08 |
| TIAM2    | -0.098497161 | 0.0254   | 0.041411 |
| TICAM1   | 0.037218186  | 0.39931  | 0.473983 |
| TICAM2   | 0.015008786  | 0.734011 | 0.784567 |
| TIE1     | -0.180038674 | 3.97E-05 | 0.000108 |
| TIFAB    | -0.163289604 | 0.000198 | 0.00048  |
| TIFA     | 0.193930934  | 9.32E-06 | 2.80E-05 |
| TIGD1    | -0.081443056 | 0.064774 | 0.096533 |
| TIGD2    | -0.055267049 | 0.210527 | 0.274012 |
| TIGD3    | -0.004815217 | 0.913195 | 0.932176 |
| TIGD4    | -0.167741217 | 0.000131 | 0.000327 |
| TIGD5    | 0.196733334  | 6.87E-06 | 2.11E-05 |
| TIGD6    | -0.204939216 | 2.74E-06 | 8.94E-06 |
| TIGD7    | -0.093146271 | 0.034576 | 0.05472  |
| TIGIT    | -0.084687305 | 0.054777 | 0.083078 |
| TIMD4    | -0.118716213 | 0.006995 | 0.012786 |
| TIMELESS | 0.357312974  | 5.92E-17 | 9.83E-16 |
| TIMM10   | 0.300486939  | 3.30E-12 | 2.65E-11 |
| TIMM13   | 0.141507465  | 0.001283 | 0.002678 |
| TIMM16   | 0.169664798  | 0.000109 | 0.000276 |
| TIMM17A  | 0.367307474  | 6.79E-18 | 1.31E-16 |
| TIMM17B  | 0.1865566    | 2.04E-05 | 5.81E-05 |
| TIMM22   | 0.197098738  | 6.60E-06 | 2.03E-05 |

|         |              |          |          |
|---------|--------------|----------|----------|
| TIMM44  | 0.19281502   | 1.05E-05 | 3.14E-05 |
| TIMM50  | 0.256959225  | 3.28E-09 | 1.67E-08 |
| TIMM8A  | 0.441180987  | 6.10E-26 | 3.90E-24 |
| TIMM8B  | 0.291548695  | 1.51E-11 | 1.10E-10 |
| TIMM9   | 0.466775937  | 3.16E-29 | 3.06E-27 |
| TIMP1   | 0.113517677  | 0.009932 | 0.017652 |
| TIMP2   | -0.077923541 | 0.077269 | 0.113105 |
| TIMP3   | -0.161865937 | 0.000225 | 0.00054  |
| TIMP4   | 0.046228724  | 0.29505  | 0.366393 |
| TINAGL1 | -0.155531889 | 0.000396 | 0.000904 |
| TINAG   | 0.127470508  | 0.003761 | 0.007211 |
| TINF2   | 0.121133563  | 0.005916 | 0.010957 |
| TIPARP  | -0.054741006 | 0.214908 | 0.279042 |
| TIPIN   | 0.365564353  | 9.96E-18 | 1.87E-16 |
| TIPRL   | 0.270695478  | 4.24E-10 | 2.49E-09 |
| TIRAP   | -0.068474465 | 0.120667 | 0.168076 |
| TJAP1   | -0.194483605 | 8.78E-06 | 2.65E-05 |
| TJP1    | -0.068998161 | 0.117846 | 0.164531 |
| TJP2    | -0.131244818 | 0.002844 | 0.005576 |
| TJP3    | -0.185198294 | 2.34E-05 | 6.61E-05 |
| TK1     | 0.383606965  | 1.68E-19 | 4.12E-18 |
| TK2     | -0.30278942  | 2.22E-12 | 1.83E-11 |
| TKTL1   | 0.065017017  | 0.140631 | 0.192609 |
| TKTL2   | 0.079125012  | 0.0728   | 0.107168 |
| TKT     | 0.088808381  | 0.04396  | 0.068052 |
| TLCD1   | 0.163982183  | 0.000186 | 0.000452 |
| TLE1    | 0.05735143   | 0.1938   | 0.254864 |
| TLE2    | -0.316075125 | 2.06E-13 | 2.00E-12 |
| TLE3    | -0.083228512 | 0.059101 | 0.0889   |
| TLE4    | -0.39097468  | 2.95E-20 | 8.01E-19 |
| TLE6    | -0.132062716 | 0.002675 | 0.005273 |
| TLK1    | 0.282134539  | 7.03E-11 | 4.62E-10 |
| TLK2    | 0.10117613   | 0.021655 | 0.035846 |
| TLL1    | -0.156599623 | 0.000361 | 0.000829 |
| TLL2    | 0.183759348  | 2.72E-05 | 7.59E-05 |
| TLN1    | -0.189035566 | 1.57E-05 | 4.57E-05 |
| TLN2    | -0.146763698 | 0.000836 | 0.001802 |
| TLR10   | -0.237827831 | 4.69E-08 | 2.03E-07 |
| TLR1    | -0.04698467  | 0.287216 | 0.3582   |
| TLR2    | -0.446559609 | 1.31E-26 | 9.16E-25 |
| TLR3    | -0.215249606 | 8.19E-07 | 2.91E-06 |
| TLR4    | -0.137611032 | 0.001747 | 0.003556 |
| TLR5    | -0.433413408 | 5.35E-25 | 3.00E-23 |
| TLR6    | 0.080511498  | 0.067907 | 0.100745 |

|         |              |          |          |
|---------|--------------|----------|----------|
| TLR7    | -0.270149033 | 4.61E-10 | 2.69E-09 |
| TLR8    | -0.131883911 | 0.002711 | 0.00534  |
| TLR9    | -0.075170608 | 0.088351 | 0.127378 |
| TLX1NB  | 0.028688951  | 0.515946 | 0.588156 |
| TLX1    | 0.054731631  | 0.214987 | 0.279108 |
| TLX2    | 0.027471629  | 0.53392  | 0.60516  |
| TLX3    | 0.087550882  | 0.047052 | 0.072372 |
| TM2D1   | 0.151938883  | 0.000541 | 0.001205 |
| TM2D2   | 0.123186896  | 0.005119 | 0.009604 |
| TM2D3   | -0.059073416 | 0.180733 | 0.239985 |
| TM4SF18 | -0.021705436 | 0.623118 | 0.685993 |
| TM4SF19 | 0.219291425  | 5.02E-07 | 1.85E-06 |
| TM4SF1  | 0.014677002  | 0.739676 | 0.789268 |
| TM4SF20 | 0.209441908  | 1.63E-06 | 5.52E-06 |
| TM4SF4  | -0.084353808 | 0.055741 | 0.084347 |
| TM4SF5  | 0.094220793  | 0.032535 | 0.051801 |
| TM6SF1  | -0.23021025  | 1.27E-07 | 5.16E-07 |
| TM6SF2  | 0.028775527  | 0.514679 | 0.587081 |
| TM7SF2  | -0.101915547 | 0.02071  | 0.034412 |
| TM7SF3  | 0.040186241  | 0.362758 | 0.437349 |
| TM7SF4  | -0.205226345 | 2.65E-06 | 8.68E-06 |
| TM9SF1  | 0.255017596  | 4.34E-09 | 2.18E-08 |
| TM9SF2  | -0.000482956 | 0.991277 | 0.993568 |
| TM9SF3  | 0.191126392  | 1.26E-05 | 3.71E-05 |
| TM9SF4  | 0.101248355  | 0.021561 | 0.035703 |
| TMBIM1  | -0.07905758  | 0.073045 | 0.107489 |
| TMBIM4  | -0.075794723 | 0.085733 | 0.123987 |
| TMBIM6  | 0.149990613  | 0.000638 | 0.001405 |
| TMC1    | 0.071393609  | 0.105596 | 0.149174 |
| TMC2    | -0.177178627 | 5.28E-05 | 0.00014  |
| TMC3    | -0.049995148 | 0.257415 | 0.326125 |
| TMC4    | -0.314071643 | 2.98E-13 | 2.82E-12 |
| TMC5    | -0.119490797 | 0.006631 | 0.012174 |
| TMC6    | -0.252232666 | 6.46E-09 | 3.17E-08 |
| TMC7    | 0.076322147  | 0.083569 | 0.121183 |
| TMC8    | -0.33500048  | 5.69E-15 | 7.01E-14 |
| TMCC1   | -0.005811985 | 0.89532  | 0.918103 |
| TMCC2   | -0.27547492  | 2.02E-10 | 1.24E-09 |
| TMCC3   | 0.004223669  | 0.923824 | 0.940433 |
| TMCO1   | 0.162801264  | 0.000207 | 0.0005   |
| TMCO2   | -0.121694866 | 0.005688 | 0.010573 |
| TMCO3   | 0.037167683  | 0.39995  | 0.47456  |
| TMCO4   | -0.188897389 | 1.59E-05 | 4.63E-05 |
| TMCO5A  | -0.081700322 | 0.06393  | 0.095425 |

|              |              |          |          |
|--------------|--------------|----------|----------|
| TMCO6        | -0.090854513 | 0.039296 | 0.061431 |
| TMCO7        | -0.035948392 | 0.415599 | 0.490349 |
| TMED10P1     | 0.277536936  | 1.46E-10 | 9.18E-10 |
| TMED10       | 0.260598699  | 1.93E-09 | 1.02E-08 |
| TMED1        | 0.110638501  | 0.011991 | 0.020913 |
| TMED2        | 0.472328689  | 5.61E-30 | 6.23E-28 |
| TMED3        | 0.117447219  | 0.007629 | 0.013849 |
| TMED4        | 0.002242234  | 0.959516 | 0.968929 |
| TMED5        | 0.169265495  | 0.000113 | 0.000286 |
| TMED6        | -0.020722258 | 0.638948 | 0.700103 |
| TMED7-TICAM2 | 0.174894368  | 6.60E-05 | 0.000173 |
| TMED7        | 0.236819581  | 5.36E-08 | 2.29E-07 |
| TMED8        | 0.022369739  | 0.61252  | 0.676559 |
| TMED9        | 0.033287749  | 0.450974 | 0.525356 |
| TMEFF1       | 0.291205844  | 1.59E-11 | 1.16E-10 |
| TMEFF2       | -0.208716785 | 1.77E-06 | 5.98E-06 |
| TMEM100      | -0.267091366 | 7.33E-10 | 4.16E-09 |
| TMEM101      | -0.006736359 | 0.878791 | 0.905219 |
| TMEM102      | -0.078961252 | 0.073396 | 0.107974 |
| TMEM104      | -0.084810013 | 0.054425 | 0.082626 |
| TMEM105      | -0.134915338 | 0.002153 | 0.004319 |
| TMEM106A     | -0.110659237 | 0.011975 | 0.02089  |
| TMEM106B     | 0.212629366  | 1.12E-06 | 3.89E-06 |
| TMEM106C     | 0.309852717  | 6.37E-13 | 5.75E-12 |
| TMEM107      | 0.022578525  | 0.609205 | 0.673664 |
| TMEM108      | -0.291615673 | 1.49E-11 | 1.09E-10 |
| TMEM109      | -0.231369803 | 1.10E-07 | 4.49E-07 |
| TMEM110      | -0.203376989 | 3.27E-06 | 1.06E-05 |
| TMEM111      | -0.052254856 | 0.236501 | 0.30316  |
| TMEM114      | -0.124115403 | 0.004792 | 0.009036 |
| TMEM115      | -0.163917921 | 0.000187 | 0.000454 |
| TMEM116      | -0.139085992 | 0.001556 | 0.003195 |
| TMEM117      | 0.251914374  | 6.76E-09 | 3.31E-08 |
| TMEM119      | -0.261023443 | 1.81E-09 | 9.65E-09 |
| TMEM11       | 0.146008524  | 0.00089  | 0.001908 |
| TMEM120A     | -0.031193308 | 0.479976 | 0.553849 |
| TMEM120B     | 0.000625264  | 0.988706 | 0.991633 |
| TMEM121      | -0.039228533 | 0.374317 | 0.449222 |
| TMEM123      | 0.117343787  | 0.007683 | 0.013936 |
| TMEM125      | -0.366065225 | 8.93E-18 | 1.69E-16 |
| TMEM126A     | 0.267926467  | 6.46E-10 | 3.70E-09 |
| TMEM126B     | 0.135912663  | 0.001993 | 0.004023 |
| TMEM127      | -0.03571576  | 0.418625 | 0.493364 |
| TMEM128      | -0.07514802  | 0.088447 | 0.127493 |

|          |              |          |          |
|----------|--------------|----------|----------|
| TMEM129  | -0.225453443 | 2.33E-07 | 9.06E-07 |
| TMEM130  | -0.420116675 | 1.94E-23 | 8.48E-22 |
| TMEM131  | -0.042287225 | 0.338191 | 0.412281 |
| TMEM132A | 0.166907885  | 0.000142 | 0.000352 |
| TMEM132B | -0.116408656 | 0.008186 | 0.014776 |
| TMEM132C | -0.371519258 | 2.67E-18 | 5.40E-17 |
| TMEM132D | -0.269684086 | 4.94E-10 | 2.87E-09 |
| TMEM132E | -0.359157815 | 3.99E-17 | 6.79E-16 |
| TMEM133  | -0.207641784 | 2.01E-06 | 6.70E-06 |
| TMEM134  | -0.087304303 | 0.047679 | 0.073201 |
| TMEM135  | 0.211503307  | 1.28E-06 | 4.41E-06 |
| TMEM136  | -0.156201119 | 0.000374 | 0.000856 |
| TMEM138  | -0.057407875 | 0.193361 | 0.254438 |
| TMEM139  | -0.075122414 | 0.088556 | 0.127618 |
| TMEM140  | -0.052666824 | 0.232821 | 0.299018 |
| TMEM141  | 0.190248379  | 1.38E-05 | 4.06E-05 |
| TMEM143  | -0.274218416 | 2.46E-10 | 1.49E-09 |
| TMEM144  | -0.016250812 | 0.712935 | 0.766507 |
| TMEM145  | 0.076343411  | 0.083483 | 0.121066 |
| TMEM146  | -0.206712528 | 2.24E-06 | 7.40E-06 |
| TMEM147  | 0.202753472  | 3.51E-06 | 1.13E-05 |
| TMEM149  | -0.139955949 | 0.001452 | 0.002999 |
| TMEM14A  | 0.277954581  | 1.37E-10 | 8.64E-10 |
| TMEM14B  | 0.292671547  | 1.25E-11 | 9.21E-11 |
| TMEM14C  | 0.210344105  | 1.47E-06 | 5.00E-06 |
| TMEM14E  | -0.125022724 | 0.00449  | 0.008504 |
| TMEM150A | -0.243004349 | 2.33E-08 | 1.06E-07 |
| TMEM150B | -0.061311677 | 0.164739 | 0.221305 |
| TMEM150C | -0.06105806  | 0.166496 | 0.223395 |
| TMEM151A | -0.066343002 | 0.132694 | 0.18293  |
| TMEM151B | -0.310913733 | 5.27E-13 | 4.80E-12 |
| TMEM154  | -0.208178064 | 1.89E-06 | 6.34E-06 |
| TMEM155  | -0.135802794 | 0.00201  | 0.004055 |
| TMEM156  | 0.126662203  | 0.003989 | 0.00762  |
| TMEM158  | 0.245028963  | 1.77E-08 | 8.15E-08 |
| TMEM159  | -0.202455228 | 3.63E-06 | 1.16E-05 |
| TMEM160  | -0.040673567 | 0.356962 | 0.431507 |
| TMEM161A | -0.012624208 | 0.775028 | 0.819167 |
| TMEM161B | -0.065286957 | 0.138987 | 0.190644 |
| TMEM163  | -0.346905965 | 5.21E-16 | 7.55E-15 |
| TMEM164  | -0.175736935 | 6.08E-05 | 0.00016  |
| TMEM165  | 0.167216099  | 0.000138 | 0.000342 |
| TMEM167A | 0.1188049    | 0.006952 | 0.012711 |
| TMEM167B | -0.123032658 | 0.005176 | 0.009698 |



|                |              |          |          |
|----------------|--------------|----------|----------|
| TMEM168        | -0.020045618 | 0.649938 | 0.709811 |
| TMEM169        | -0.128015707 | 0.003614 | 0.006948 |
| TMEM170A       | -0.027713328 | 0.530326 | 0.60194  |
| TMEM170B       | -0.199304086 | 5.17E-06 | 1.62E-05 |
| TMEM171        | 0.158860477  | 0.000295 | 0.000691 |
| TMEM173        | -0.449962665 | 4.88E-27 | 3.59E-25 |
| TMEM174        | 0.01019281   | 0.817505 | 0.854392 |
| TMEM175        | -0.411152143 | 2.00E-22 | 7.39E-21 |
| TMEM176A       | 0.030788903  | 0.485691 | 0.559184 |
| TMEM176B       | 0.021909876  | 0.619848 | 0.683032 |
| TMEM177        | 0.231218263  | 1.12E-07 | 4.57E-07 |
| TMEM178        | -0.213428066 | 1.02E-06 | 3.57E-06 |
| TMEM179B       | 0.061417679  | 0.164008 | 0.220472 |
| TMEM179        | -0.086246602 | 0.050449 | 0.077152 |
| TMEM17         | 0.067334052  | 0.126992 | 0.175796 |
| TMEM180        | -0.047023133 | 0.286821 | 0.357742 |
| TMEM181        | -0.095500811 | 0.030239 | 0.048528 |
| TMEM182        | 0.259619727  | 2.23E-09 | 1.17E-08 |
| TMEM183A       | 0.274511315  | 2.35E-10 | 1.43E-09 |
| TMEM184A       | -0.030160507 | 0.494643 | 0.567917 |
| TMEM184B       | 0.036872969  | 0.4037   | 0.478399 |
| TMEM184C       | 0.111272324  | 0.011508 | 0.020168 |
| TMEM185A       | -0.105907921 | 0.016201 | 0.027503 |
| TMEM185B       | 0.318722327  | 1.27E-13 | 1.27E-12 |
| TMEM186        | 0.079470678  | 0.071554 | 0.105606 |
| TMEM187        | -0.047297136 | 0.284019 | 0.354855 |
| TMEM188        | 0.032358637  | 0.463716 | 0.537596 |
| TMEM189-UBE2V1 | 0.113896393  | 0.009685 | 0.017251 |
| TMEM189        | 0.199547119  | 5.03E-06 | 1.58E-05 |
| TMEM18         | 0.09996726   | 0.023281 | 0.038271 |
| TMEM190        | -0.214579858 | 8.87E-07 | 3.14E-06 |
| TMEM191A       | -0.129529532 | 0.003232 | 0.006274 |
| TMEM192        | 0.016903873  | 0.701938 | 0.757374 |
| TMEM194A       | 0.208856026  | 1.74E-06 | 5.89E-06 |
| TMEM194B       | 0.209367436  | 1.64E-06 | 5.56E-06 |
| TMEM195        | 0.109779378  | 0.012675 | 0.021998 |
| TMEM196        | -0.041968306 | 0.34185  | 0.416031 |
| TMEM198        | -0.108622876 | 0.01365  | 0.023552 |
| TMEM199        | 0.197049407  | 6.63E-06 | 2.04E-05 |
| TMEM19         | 0.092086282  | 0.036696 | 0.05774  |
| TMEM200A       | -0.041835475 | 0.343381 | 0.417488 |
| TMEM200B       | 0.017641854  | 0.689587 | 0.74598  |
| TMEM200C       | 0.02704016   | 0.540366 | 0.611218 |
| TMEM201        | -0.033502729 | 0.448054 | 0.52232  |

|          |              |          |          |
|----------|--------------|----------|----------|
| TMEM202  | 0.08053871   | 0.067814 | 0.100621 |
| TMEM203  | 0.13584168   | 0.002004 | 0.004044 |
| TMEM204  | -0.261357298 | 1.73E-09 | 9.21E-09 |
| TMEM205  | -0.079641475 | 0.070945 | 0.104769 |
| TMEM206  | 0.379102793  | 4.78E-19 | 1.09E-17 |
| TMEM207  | 0.015732538  | 0.721704 | 0.773896 |
| TMEM208  | 0.115916037  | 0.008462 | 0.015218 |
| TMEM209  | 0.161910684  | 0.000224 | 0.000538 |
| TMEM20   | 0.00323992   | 0.94153  | 0.953697 |
| TMEM211  | -0.083789525 | 0.057406 | 0.086598 |
| TMEM212  | -0.212995743 | 1.07E-06 | 3.74E-06 |
| TMEM213  | -0.212105569 | 1.19E-06 | 4.12E-06 |
| TMEM214  | 0.032305009  | 0.464457 | 0.538334 |
| TMEM215  | -0.017863425 | 0.685894 | 0.742668 |
| TMEM216  | 0.157622003  | 0.00033  | 0.000763 |
| TMEM217  | -0.183013598 | 2.93E-05 | 8.15E-05 |
| TMEM218  | -0.024973659 | 0.571765 | 0.6399   |
| TMEM219  | -0.120408997 | 0.006222 | 0.011479 |
| TMEM220  | -0.300541455 | 3.27E-12 | 2.63E-11 |
| TMEM222  | -0.200075178 | 4.75E-06 | 1.49E-05 |
| TMEM223  | 0.27397728   | 2.55E-10 | 1.55E-09 |
| TMEM229A | 0.021284539  | 0.629874 | 0.691906 |
| TMEM229B | -0.122760271 | 0.005276 | 0.009872 |
| TMEM22   | 0.23760457   | 4.83E-08 | 2.08E-07 |
| TMEM231  | -0.19945257  | 5.09E-06 | 1.59E-05 |
| TMEM232  | -0.283174531 | 5.95E-11 | 3.95E-10 |
| TMEM233  | -0.08766933  | 0.046753 | 0.071968 |
| TMEM25   | -0.275329221 | 2.07E-10 | 1.27E-09 |
| TMEM26   | 0.072418333  | 0.100674 | 0.14313  |
| TMEM27   | -0.224748865 | 2.55E-07 | 9.84E-07 |
| TMEM2    | 0.053542151  | 0.225137 | 0.290381 |
| TMEM30A  | -0.000129027 | 0.997669 | 0.998519 |
| TMEM30B  | -0.07793058  | 0.077242 | 0.113091 |
| TMEM30C  | 0.02809237   | 0.524715 | 0.596689 |
| TMEM31   | -0.010914736 | 0.804831 | 0.843839 |
| TMEM33   | 0.301905906  | 2.58E-12 | 2.11E-11 |
| TMEM35   | -0.090253713 | 0.04062  | 0.063357 |
| TMEM37   | -0.289662124 | 2.06E-11 | 1.47E-10 |
| TMEM38A  | -0.050216744 | 0.255309 | 0.323802 |
| TMEM38B  | 0.299905523  | 3.65E-12 | 2.91E-11 |
| TMEM39A  | 0.203980934  | 3.06E-06 | 9.90E-06 |
| TMEM39B  | -0.169636882 | 0.00011  | 0.000277 |
| TMEM40   | 0.002542418  | 0.954102 | 0.964623 |
| TMEM41A  | 0.078883351  | 0.073681 | 0.108338 |

|         |              |          |          |
|---------|--------------|----------|----------|
| TMEM41B | -0.05510119  | 0.211901 | 0.275568 |
| TMEM42  | -0.057429146 | 0.193196 | 0.25427  |
| TMEM43  | -0.218984975 | 5.21E-07 | 1.92E-06 |
| TMEM44  | -0.03625076  | 0.411685 | 0.486391 |
| TMEM45A | 0.167324294  | 0.000136 | 0.000339 |
| TMEM45B | 0.02866378   | 0.516314 | 0.588542 |
| TMEM47  | -0.13112243  | 0.00287  | 0.00562  |
| TMEM48  | 0.432575036  | 6.74E-25 | 3.70E-23 |
| TMEM49  | 0.077987227  | 0.077027 | 0.112798 |
| TMEM50A | -0.059804414 | 0.175388 | 0.23396  |
| TMEM50B | -0.210761527 | 1.40E-06 | 4.78E-06 |
| TMEM51  | -0.044714115 | 0.311172 | 0.383152 |
| TMEM52  | 0.045495189  | 0.302787 | 0.374466 |
| TMEM53  | -0.074513175 | 0.091179 | 0.130982 |
| TMEM54  | -0.06405751  | 0.146598 | 0.19974  |
| TMEM55A | 0.139464621  | 0.00151  | 0.003111 |
| TMEM55B | 0.098398816  | 0.025548 | 0.041634 |
| TMEM56  | -0.161626303 | 0.00023  | 0.000551 |
| TMEM57  | -0.227438774 | 1.81E-07 | 7.17E-07 |
| TMEM59L | -0.100371752 | 0.022726 | 0.037429 |
| TMEM59  | -0.13200193  | 0.002687 | 0.005297 |
| TMEM5   | 0.316004696  | 2.09E-13 | 2.02E-12 |
| TMEM60  | 0.049699506  | 0.260243 | 0.329074 |
| TMEM61  | -0.038058778 | 0.38874  | 0.463584 |
| TMEM62  | 0.055372333  | 0.209658 | 0.273059 |
| TMEM63A | -0.360140927 | 3.23E-17 | 5.61E-16 |
| TMEM63B | -0.291019983 | 1.64E-11 | 1.19E-10 |
| TMEM63C | -0.22010717  | 4.54E-07 | 1.69E-06 |
| TMEM64  | 0.014715944  | 0.73901  | 0.788758 |
| TMEM65  | 0.327690779  | 2.35E-14 | 2.62E-13 |
| TMEM66  | -0.135672103 | 0.002031 | 0.004093 |
| TMEM67  | -0.020371017 | 0.644643 | 0.705184 |
| TMEM68  | 0.209409152  | 1.64E-06 | 5.54E-06 |
| TMEM69  | 0.205801441  | 2.48E-06 | 8.17E-06 |
| TMEM70  | 0.317260905  | 1.66E-13 | 1.63E-12 |
| TMEM71  | -0.120973559 | 0.005982 | 0.011072 |
| TMEM72  | -0.028289723 | 0.521806 | 0.593786 |
| TMEM74  | 0.154232392  | 0.000444 | 0.001005 |
| TMEM79  | 0.065873241  | 0.135466 | 0.186339 |
| TMEM80  | -0.26860154  | 5.83E-10 | 3.36E-09 |
| TMEM81  | 0.013854516  | 0.753779 | 0.801326 |
| TMEM82  | 0.105384882  | 0.016738 | 0.028333 |
| TMEM84  | -0.006971218 | 0.874599 | 0.90213  |
| TMEM85  | 0.260324746  | 2.01E-09 | 1.06E-08 |

|             |              |          |          |
|-------------|--------------|----------|----------|
| TMEM86A     | -0.160094689 | 0.000264 | 0.000624 |
| TMEM86B     | -0.193654387 | 9.60E-06 | 2.88E-05 |
| TMEM87A     | -0.149020446 | 0.000692 | 0.001517 |
| TMEM87B     | 0.106142233  | 0.015965 | 0.027138 |
| TMEM88B     | -0.078059235 | 0.076753 | 0.112474 |
| TMEM88      | -0.276091074 | 1.83E-10 | 1.14E-09 |
| TMEM89      | -0.100170761 | 0.023    | 0.037853 |
| TMEM8A      | -0.048563625 | 0.271308 | 0.341256 |
| TMEM8B      | -0.465472963 | 4.71E-29 | 4.46E-27 |
| TMEM8C      | -0.099895424 | 0.023381 | 0.038407 |
| TMEM90A     | -0.373373366 | 1.76E-18 | 3.66E-17 |
| TMEM90B     | 0.012378814  | 0.779287 | 0.822451 |
| TMEM91      | -0.345630607 | 6.76E-16 | 9.57E-15 |
| TMEM92      | -0.072161553 | 0.10189  | 0.144581 |
| TMEM93      | 0.284893081  | 4.50E-11 | 3.05E-10 |
| TMEM95      | 0.04631383   | 0.294161 | 0.365516 |
| TMEM97      | 0.04335318   | 0.326144 | 0.399404 |
| TMEM98      | -0.288556962 | 2.47E-11 | 1.74E-10 |
| TMEM99      | -0.006664982 | 0.880065 | 0.906113 |
| TMEM9B      | -0.139101624 | 0.001554 | 0.003192 |
| TMEM9       | 0.026586209  | 0.547189 | 0.617573 |
| TMF1        | -0.017318703 | 0.694986 | 0.750926 |
| TMIE        | 0.020373378  | 0.644605 | 0.705181 |
| TMIGD1      | 0.089972865  | 0.041252 | 0.064277 |
| TMIGD2      | -0.009846734 | 0.823597 | 0.859593 |
| TMLHE       | 0.054739177  | 0.214923 | 0.279044 |
| TMOD1       | -0.165105207 | 0.000167 | 0.000411 |
| TMOD2       | -0.260901999 | 1.85E-09 | 9.82E-09 |
| TMOD3       | 0.157575257  | 0.000331 | 0.000766 |
| TMOD4       | -0.147338738 | 0.000797 | 0.001725 |
| TMPO        | 0.440738409  | 6.91E-26 | 4.40E-24 |
| TMPPE       | -0.01858884  | 0.673858 | 0.731697 |
| TMPRSS11A   | 0.040665565  | 0.357057 | 0.43154  |
| TMPRSS11BNL | -0.012237585 | 0.781741 | 0.824562 |
| TMPRSS11B   | -0.021306542 | 0.62952  | 0.691653 |
| TMPRSS11D   | 0.01996024   | 0.651331 | 0.711138 |
| TMPRSS11F   | 0.076919501  | 0.081172 | 0.118144 |
| TMPRSS12    | -0.024714744 | 0.57576  | 0.643388 |
| TMPRSS13    | -0.057590855 | 0.191943 | 0.252838 |
| TMPRSS15    | 0.081639627  | 0.064128 | 0.095699 |
| TMPRSS2     | -0.480673348 | 3.94E-31 | 5.26E-29 |
| TMPRSS3     | -0.171840388 | 8.88E-05 | 0.000228 |
| TMPRSS4     | -0.096198867 | 0.029046 | 0.046756 |
| TMPRSS5     | -0.229581016 | 1.38E-07 | 5.56E-07 |

|           |              |          |          |
|-----------|--------------|----------|----------|
| TMPRSS6   | -0.082398264 | 0.061686 | 0.092447 |
| TMPRSS7   | -0.16767901  | 0.000132 | 0.000329 |
| TMPRSS9   | -0.077220545 | 0.079986 | 0.116654 |
| TMSB10    | 0.286375373  | 3.54E-11 | 2.43E-10 |
| TMSB15A   | 0.010105951  | 0.819033 | 0.855633 |
| TMSB15B   | 0.015618207  | 0.723643 | 0.775684 |
| TMSB4Y    | 0.133671094  | 0.002368 | 0.004713 |
| TMSL3     | -0.133368123 | 0.002423 | 0.004812 |
| TMTC1     | 0.009724944  | 0.825744 | 0.861294 |
| TMTC2     | -0.159176192 | 0.000287 | 0.000674 |
| TMTC3     | 0.378703953  | 5.23E-19 | 1.19E-17 |
| TMTC4     | 0.033604978  | 0.446669 | 0.521035 |
| TMUB1     | 0.037610916  | 0.39435  | 0.469294 |
| TMUB2     | -0.169018755 | 0.000116 | 0.000292 |
| TMX1      | 0.438270432  | 1.38E-25 | 8.52E-24 |
| TMX2      | 0.261463978  | 1.70E-09 | 9.08E-09 |
| TMX3      | -0.017724048 | 0.688216 | 0.744819 |
| TMX4      | -0.077281926 | 0.079745 | 0.11633  |
| TNC       | -0.015299486 | 0.729059 | 0.780485 |
| TNFAIP1   | 0.109116025  | 0.013226 | 0.022881 |
| TNFAIP2   | -0.096215543 | 0.029018 | 0.046715 |
| TNFAIP3   | -0.077096751 | 0.080472 | 0.11727  |
| TNFAIP6   | 0.225202253  | 2.41E-07 | 9.33E-07 |
| TNFAIP8L1 | 0.063732046  | 0.148665 | 0.202198 |
| TNFAIP8L2 | -0.227832941 | 1.73E-07 | 6.84E-07 |
| TNFAIP8L3 | -0.087838199 | 0.04633  | 0.071388 |
| TNFAIP8   | -0.111309206 | 0.01148  | 0.020128 |
| TNFRSF10A | 0.088236284  | 0.045345 | 0.069994 |
| TNFRSF10B | -0.029522879 | 0.503815 | 0.576433 |
| TNFRSF10C | -0.208151605 | 1.89E-06 | 6.36E-06 |
| TNFRSF10D | -0.009392682 | 0.831607 | 0.865918 |
| TNFRSF11A | -0.104388846 | 0.017803 | 0.029974 |
| TNFRSF11B | -0.021370832 | 0.628487 | 0.690989 |
| TNFRSF12A | 0.035225502  | 0.425045 | 0.499665 |
| TNFRSF13B | -0.311837333 | 4.46E-13 | 4.11E-12 |
| TNFRSF13C | -0.155589479 | 0.000394 | 0.0009   |
| TNFRSF14  | -0.402241897 | 1.89E-21 | 6.22E-20 |
| TNFRSF17  | -0.02734533  | 0.535803 | 0.606847 |
| TNFRSF18  | 0.01612774   | 0.715014 | 0.76804  |
| TNFRSF19  | -0.200766186 | 4.39E-06 | 1.39E-05 |
| TNFRSF1A  | 0.193393997  | 9.87E-06 | 2.96E-05 |
| TNFRSF1B  | -0.241600262 | 2.83E-08 | 1.26E-07 |
| TNFRSF21  | 0.123878426  | 0.004874 | 0.009177 |
| TNFRSF25  | -0.132134924 | 0.00266  | 0.005247 |

|                 |              |          |          |
|-----------------|--------------|----------|----------|
| TNFRSF4         | -0.126633415 | 0.003997 | 0.007632 |
| TNFRSF6B        | 0.043878817  | 0.320307 | 0.393044 |
| TNFRSF8         | -0.02752879  | 0.533069 | 0.604435 |
| TNFRSF9         | 0.062795293  | 0.154738 | 0.209404 |
| TNFSF10         | -0.231208793 | 1.12E-07 | 4.57E-07 |
| TNFSF11         | 0.194232719  | 9.02E-06 | 2.72E-05 |
| TNFSF12-TNFSF13 | -0.097514575 | 0.026908 | 0.043658 |
| TNFSF12         | -0.379585797 | 4.27E-19 | 9.85E-18 |
| TNFSF13B        | -0.061257975 | 0.165109 | 0.221758 |
| TNFSF13         | -0.334453645 | 6.33E-15 | 7.76E-14 |
| TNFSF14         | -0.1703733   | 0.000102 | 0.00026  |
| TNFSF15         | -0.167165333 | 0.000138 | 0.000344 |
| TNFSF18         | -0.059243188 | 0.179481 | 0.238655 |
| TNFSF4          | 0.167425274  | 0.000135 | 0.000336 |
| TNFSF8          | -0.160261989 | 0.00026  | 0.000616 |
| TNFSF9          | 0.09088551   | 0.039229 | 0.061345 |
| TNF             | -0.136826364 | 0.001857 | 0.003764 |
| TNIK            | -0.306955607 | 1.07E-12 | 9.30E-12 |
| TNIP1           | -0.151640982 | 0.000555 | 0.001234 |
| TNIP2           | 0.100749055  | 0.022218 | 0.036689 |
| TNIP3           | 0.049068767  | 0.266348 | 0.335852 |
| TNK1            | -0.107105119 | 0.015028 | 0.025729 |
| TNK2            | -0.313242054 | 3.46E-13 | 3.25E-12 |
| TNKS1BP1        | -0.278609887 | 1.23E-10 | 7.84E-10 |
| TNKS2           | -0.046138633 | 0.295993 | 0.367313 |
| TNKS            | -0.113822892 | 0.009733 | 0.017326 |
| TNMD            | 0.009423232  | 0.831068 | 0.865475 |
| TNNC1           | -0.349125409 | 3.30E-16 | 4.90E-15 |
| TNNC2           | -0.078640822 | 0.074575 | 0.109563 |
| TNNI1           | -0.175784151 | 6.05E-05 | 0.000159 |
| TNNI2           | -0.293580474 | 1.07E-11 | 7.98E-11 |
| TNNI3K          | -0.34105867  | 1.71E-15 | 2.29E-14 |
| TNNI3           | 0.07452134   | 0.091143 | 0.13094  |
| TNNT1           | 0.166977811  | 0.000141 | 0.00035  |
| TNNT2           | -0.258375602 | 2.67E-09 | 1.38E-08 |
| TNNT3           | -0.257400136 | 3.08E-09 | 1.58E-08 |
| TNN             | -0.304008876 | 1.79E-12 | 1.51E-11 |
| TNP1            | 0.017495187  | 0.692035 | 0.748102 |
| TNP2            | -0.021970441 | 0.618881 | 0.682192 |
| TNPO1           | 0.286796108  | 3.30E-11 | 2.28E-10 |
| TNPO2           | -0.001610978 | 0.970908 | 0.978101 |
| TNPO3           | 0.186876061  | 1.97E-05 | 5.64E-05 |
| TNRC18          | -0.188891828 | 1.60E-05 | 4.63E-05 |
| TNRC6A          | -0.273889298 | 2.59E-10 | 1.57E-09 |

|          |              |          |          |
|----------|--------------|----------|----------|
| TNRC6B   | -0.267996947 | 6.39E-10 | 3.66E-09 |
| TNRC6C   | -0.369259488 | 4.41E-18 | 8.70E-17 |
| TNR      | -0.221428265 | 3.86E-07 | 1.45E-06 |
| TNS1     | -0.480667058 | 3.95E-31 | 5.26E-29 |
| TNS3     | -0.082600836 | 0.061047 | 0.091613 |
| TNS4     | 0.144745753  | 0.000987 | 0.002101 |
| TNXB     | -0.465604261 | 4.53E-29 | 4.33E-27 |
| TOB1     | -0.147048382 | 0.000816 | 0.001764 |
| TOB2     | -0.133587084 | 0.002383 | 0.004741 |
| TOE1     | -0.08982282  | 0.041593 | 0.064753 |
| TOLLIP   | -0.280586318 | 9.01E-11 | 5.84E-10 |
| TOM1L1   | 0.053576377  | 0.22484  | 0.290073 |
| TOM1L2   | -0.453163718 | 1.91E-27 | 1.48E-25 |
| TOM1     | -0.200132312 | 4.72E-06 | 1.48E-05 |
| TOMM20L  | 0.139288289  | 0.001531 | 0.00315  |
| TOMM20   | 0.207630043  | 2.01E-06 | 6.71E-06 |
| TOMM22   | 0.29062995   | 1.75E-11 | 1.27E-10 |
| TOMM34   | 0.179271987  | 4.28E-05 | 0.000116 |
| TOMM40L  | 0.137602537  | 0.001748 | 0.003558 |
| TOMM40   | 0.3648283    | 1.17E-17 | 2.16E-16 |
| TOMM5    | 0.421286887  | 1.42E-23 | 6.35E-22 |
| TOMM6    | 0.110927509  | 0.011769 | 0.020562 |
| TOMM70A  | 0.356092912  | 7.67E-17 | 1.25E-15 |
| TOMM7    | 0.000233726  | 0.995778 | 0.997175 |
| TOP1MT   | 0.054974585  | 0.212954 | 0.276812 |
| TOP1P1   | 0.074414003  | 0.091611 | 0.131471 |
| TOP1P2   | 0.112465286  | 0.010645 | 0.018786 |
| TOP1     | 0.159535451  | 0.000278 | 0.000654 |
| TOP2A    | 0.473148283  | 4.34E-30 | 4.90E-28 |
| TOP2B    | -0.12384211  | 0.004886 | 0.009197 |
| TOP3A    | 0.071792949  | 0.103656 | 0.146734 |
| TOP3B    | -0.127418074 | 0.003775 | 0.007237 |
| TOPBP1   | 0.282203887  | 6.95E-11 | 4.58E-10 |
| TOPORS   | 0.009472951  | 0.83019  | 0.864983 |
| TOR1AIP1 | -0.125259053 | 0.004415 | 0.008368 |
| TOR1AIP2 | 0.056722881  | 0.198738 | 0.260518 |
| TOR1A    | 0.182700632  | 3.03E-05 | 8.39E-05 |
| TOR1B    | 0.09457297   | 0.031889 | 0.050858 |
| TOR2A    | -0.130868633 | 0.002925 | 0.005725 |
| TOR3A    | 0.063597154  | 0.149528 | 0.203262 |
| TOX2     | -0.217000876 | 6.63E-07 | 2.40E-06 |
| TOX3     | -0.146616356 | 0.000846 | 0.001823 |
| TOX4     | 0.125386167  | 0.004375 | 0.008299 |
| TOX      | -0.301268482 | 2.89E-12 | 2.34E-11 |

|          |              |          |          |
|----------|--------------|----------|----------|
| TP53AIP1 | -0.123837882 | 0.004888 | 0.009199 |
| TP53BP1  | -0.023644119 | 0.592414 | 0.658318 |
| TP53BP2  | -0.005489579 | 0.901096 | 0.922671 |
| TP53I11  | -0.181719983 | 3.35E-05 | 9.20E-05 |
| TP53I13  | -0.115698628 | 0.008587 | 0.015416 |
| TP53I3   | 0.148088853  | 0.000749 | 0.001631 |
| TP53INP1 | -0.253903775 | 5.10E-09 | 2.54E-08 |
| TP53INP2 | 0.05916894   | 0.180028 | 0.239255 |
| TP53RK   | 0.218913033  | 5.25E-07 | 1.93E-06 |
| TP53TG1  | -0.131462182 | 0.002798 | 0.005493 |
| TP53TG3B | 0.052586628  | 0.233534 | 0.299876 |
| TP53TG5  | -0.051402739 | 0.244242 | 0.311644 |
| TP53     | -0.101975305 | 0.020635 | 0.034296 |
| TP63     | -0.199369013 | 5.13E-06 | 1.61E-05 |
| TP73     | -0.226403812 | 2.07E-07 | 8.11E-07 |
| TPBG     | 0.070768477  | 0.108692 | 0.153157 |
| TPCN1    | -0.126654245 | 0.003991 | 0.007623 |
| TPCN2    | -0.007317406 | 0.868427 | 0.897199 |
| TPD52L1  | 0.080363142  | 0.068418 | 0.101434 |
| TPD52L2  | 0.270577695  | 4.31E-10 | 2.53E-09 |
| TPD52L3  | -0.038856635 | 0.378866 | 0.453661 |
| TPD52    | 0.272360209  | 3.28E-10 | 1.95E-09 |
| TPH1     | -0.071469812 | 0.105224 | 0.148721 |
| TPH2     | 0.06800389   | 0.123247 | 0.171263 |
| TPI1P2   | 0.116453732  | 0.008161 | 0.014735 |
| TPI1P3   | 0.159510117  | 0.000279 | 0.000655 |
| TPI1     | 0.454455976  | 1.30E-27 | 1.03E-25 |
| TPK1     | -0.186749507 | 2.00E-05 | 5.71E-05 |
| TPM1     | -0.041636327 | 0.345685 | 0.419932 |
| TPM2     | 0.098920739  | 0.024773 | 0.040474 |
| TPM3     | 0.372210427  | 2.28E-18 | 4.68E-17 |
| TPM4     | 0.166721497  | 0.000144 | 0.000357 |
| TPMT     | 0.137773869  | 0.001725 | 0.003516 |
| TPO      | -0.046469142 | 0.292543 | 0.3638   |
| TPP1     | -0.250802572 | 7.91E-09 | 3.85E-08 |
| TPP2     | -0.151017112 | 0.000585 | 0.001295 |
| TPPP2    | -0.184983155 | 2.40E-05 | 6.75E-05 |
| TPPP3    | -0.33579399  | 4.86E-15 | 6.05E-14 |
| TPPP     | -0.383772879 | 1.62E-19 | 3.99E-18 |
| TPRA1    | -0.137984689 | 0.001696 | 0.003465 |
| TPRG1L   | -0.259937531 | 2.13E-09 | 1.12E-08 |
| TPRG1    | -0.217770966 | 6.04E-07 | 2.20E-06 |
| TPRKB    | 0.381204699  | 2.94E-19 | 6.97E-18 |
| TPRN     | 0.036775111  | 0.40495  | 0.479709 |



|           |              |          |          |
|-----------|--------------|----------|----------|
| TPRX1     | 0.005401739  | 0.902671 | 0.92384  |
| TPRXL     | -0.008815362 | 0.841817 | 0.874772 |
| TPR       | -0.064754164 | 0.142247 | 0.194595 |
| TPSAB1    | -0.344833018 | 7.96E-16 | 1.11E-14 |
| TPSB2     | -0.351816775 | 1.89E-16 | 2.88E-15 |
| TPSD1     | -0.174937655 | 6.58E-05 | 0.000172 |
| TPSG1     | -0.167685739 | 0.000132 | 0.000329 |
| TPST1     | -0.023884644 | 0.588653 | 0.654914 |
| TPST2     | -0.00903516  | 0.837927 | 0.871115 |
| TPT1      | 0.041431726  | 0.348063 | 0.422486 |
| TPTE2P1   | -0.118624649 | 0.007039 | 0.012859 |
| TPTE2P3   | -0.085721865 | 0.051872 | 0.079074 |
| TPTE2     | 0.005850111  | 0.894637 | 0.917591 |
| TPTE      | 0.106031523  | 0.016076 | 0.027301 |
| TPX2      | 0.513965018  | 4.61E-36 | 1.56E-33 |
| TRA2A     | -0.048706498 | 0.269899 | 0.339698 |
| TRA2B     | 0.255169226  | 4.25E-09 | 2.14E-08 |
| TRABD     | -0.113153661 | 0.010173 | 0.018036 |
| TRADD     | -0.224410957 | 2.66E-07 | 1.02E-06 |
| TRAF1     | -0.230761272 | 1.19E-07 | 4.83E-07 |
| TRAF2     | 0.102716291  | 0.019727 | 0.032921 |
| TRAF3IP1  | -0.046102574 | 0.296371 | 0.367714 |
| TRAF3IP2  | -0.116025989 | 0.0084   | 0.015122 |
| TRAF3IP3  | -0.284186432 | 5.05E-11 | 3.39E-10 |
| TRAF3     | 0.074673292  | 0.090483 | 0.130058 |
| TRAF4     | 0.109188653  | 0.013165 | 0.022786 |
| TRAF5     | -0.126747673 | 0.003964 | 0.007577 |
| TRAF6     | -0.151940529 | 0.000541 | 0.001205 |
| TRAF7     | 0.138704046  | 0.001603 | 0.003284 |
| TRAFD1    | -0.163489874 | 0.000194 | 0.000471 |
| TRAIP     | 0.36723104   | 6.91E-18 | 1.32E-16 |
| TRAK1     | -0.173751175 | 7.38E-05 | 0.000192 |
| TRAK2     | -0.27039997  | 4.43E-10 | 2.59E-09 |
| TRAM1L1   | -0.140065456 | 0.00144  | 0.002976 |
| TRAM1     | 0.004185186  | 0.924516 | 0.941089 |
| TRAM2     | 0.036910127  | 0.403226 | 0.477866 |
| TRANK1    | -0.414539265 | 8.34E-23 | 3.30E-21 |
| TRAP1     | 0.204102963  | 3.01E-06 | 9.77E-06 |
| TRAPPC10  | -0.213610746 | 9.96E-07 | 3.50E-06 |
| TRAPPC1   | -0.03875497  | 0.380116 | 0.454819 |
| TRAPPC2L  | 0.089231574  | 0.042959 | 0.066641 |
| TRAPPC2P1 | 0.046089142  | 0.296512 | 0.367843 |
| TRAPPC2   | -0.158055717 | 0.000317 | 0.000737 |
| TRAPPC3   | 0.01198217   | 0.786185 | 0.828156 |

|          |              |          |          |
|----------|--------------|----------|----------|
| TRAPPC4  | 0.098849191  | 0.024878 | 0.040633 |
| TRAPPC5  | 0.026831923  | 0.543491 | 0.614231 |
| TRAPPC6A | -0.184907891 | 2.42E-05 | 6.80E-05 |
| TRAPPC6B | 0.138444397  | 0.001636 | 0.003348 |
| TRAPPC9  | 0.051193241  | 0.246172 | 0.313847 |
| TRAT1    | -0.144180584 | 0.001034 | 0.002193 |
| TRDMT1   | -0.144344419 | 0.00102  | 0.002168 |
| TRDN     | 0.131168501  | 0.00286  | 0.005604 |
| TREH     | -0.095643211 | 0.029992 | 0.048175 |
| TREM1    | 0.064383421  | 0.14455  | 0.197394 |
| TREM2    | -0.230888399 | 1.17E-07 | 4.75E-07 |
| TREML1   | -0.391037313 | 2.91E-20 | 7.91E-19 |
| TREML2P1 | 0.006608692  | 0.88107  | 0.906747 |
| TREML2   | -0.231146299 | 1.13E-07 | 4.61E-07 |
| TREML3   | 0.244138614  | 2.00E-08 | 9.16E-08 |
| TREML4   | 0.009074784  | 0.837226 | 0.87068  |
| TRERF1   | 0.077170373  | 0.080182 | 0.116916 |
| TREX1    | -0.276370456 | 1.76E-10 | 1.09E-09 |
| TREX2    | -0.225633064 | 2.28E-07 | 8.87E-07 |
| TRHDE    | -0.148790536 | 0.000706 | 0.001544 |
| TRHR     | 0.003819701  | 0.931091 | 0.945999 |
| TRH      | -0.073804586 | 0.094307 | 0.134913 |
| TRIAP1   | 0.368859823  | 4.82E-18 | 9.44E-17 |
| TRIB1    | -0.079335466 | 0.072039 | 0.106245 |
| TRIB2    | -0.182402754 | 3.12E-05 | 8.62E-05 |
| TRIB3    | 0.304218458  | 1.73E-12 | 1.46E-11 |
| TRIL     | -0.205170708 | 2.67E-06 | 8.73E-06 |
| TRIM10   | 0.215254777  | 8.18E-07 | 2.91E-06 |
| TRIM11   | 0.041913445  | 0.342482 | 0.416584 |
| TRIM13   | -0.17492407  | 6.58E-05 | 0.000172 |
| TRIM14   | -0.202605575 | 3.57E-06 | 1.15E-05 |
| TRIM15   | 0.27735242   | 1.50E-10 | 9.43E-10 |
| TRIM16L  | 0.26284235   | 1.39E-09 | 7.51E-09 |
| TRIM16   | 0.268750231  | 5.70E-10 | 3.28E-09 |
| TRIM17   | -0.124975144 | 0.004506 | 0.008529 |
| TRIM21   | -0.041952581 | 0.342031 | 0.416201 |
| TRIM22   | -0.389732112 | 3.97E-20 | 1.06E-18 |
| TRIM23   | -0.199811817 | 4.89E-06 | 1.53E-05 |
| TRIM24   | -0.077926957 | 0.077256 | 0.113097 |
| TRIM25   | -0.008337121 | 0.850294 | 0.881793 |
| TRIM26   | -0.185431807 | 2.29E-05 | 6.47E-05 |
| TRIM27   | 0.121942545  | 0.005589 | 0.01041  |
| TRIM28   | 0.177501538  | 5.11E-05 | 0.000136 |
| TRIM29   | -0.062201847 | 0.158682 | 0.214176 |

|              |              |          |          |
|--------------|--------------|----------|----------|
| TRIM2        | -0.220948721 | 4.09E-07 | 1.53E-06 |
| TRIM31       | 0.142892368  | 0.001148 | 0.002416 |
| TRIM32       | -0.008173952 | 0.853191 | 0.884017 |
| TRIM33       | -0.048837935 | 0.268607 | 0.338285 |
| TRIM34       | -0.13465627  | 0.002196 | 0.004398 |
| TRIM35       | -0.225932289 | 2.20E-07 | 8.56E-07 |
| TRIM36       | -0.085127511 | 0.053525 | 0.081358 |
| TRIM37       | 0.182118181  | 3.21E-05 | 8.85E-05 |
| TRIM38       | -0.306843964 | 1.09E-12 | 9.48E-12 |
| TRIM39       | -0.249011894 | 1.02E-08 | 4.87E-08 |
| TRIM3        | -0.226730042 | 1.99E-07 | 7.80E-07 |
| TRIM40       | 0.236925413  | 5.29E-08 | 2.27E-07 |
| TRIM41       | -0.328575059 | 1.98E-14 | 2.24E-13 |
| TRIM42       | 0.010800466  | 0.806833 | 0.845496 |
| TRIM43       | -0.005451921 | 0.901771 | 0.923202 |
| TRIM44       | -0.019732301 | 0.655054 | 0.714615 |
| TRIM45       | -0.210221014 | 1.49E-06 | 5.07E-06 |
| TRIM46       | -0.054030403 | 0.22093  | 0.285692 |
| TRIM47       | -0.065718163 | 0.13639  | 0.187456 |
| TRIM48       | -0.022193328 | 0.615327 | 0.679023 |
| TRIM49L      | 0.017440651  | 0.692946 | 0.748925 |
| TRIM49       | -0.09701804  | 0.027698 | 0.044807 |
| TRIM4        | -0.127946592 | 0.003632 | 0.00698  |
| TRIM50       | -0.284751459 | 4.61E-11 | 3.11E-10 |
| TRIM52       | -0.404768738 | 1.01E-21 | 3.43E-20 |
| TRIM53       | -0.163032185 | 0.000203 | 0.00049  |
| TRIM54       | -0.103550032 | 0.018746 | 0.031424 |
| TRIM55       | -0.0596746   | 0.176328 | 0.235105 |
| TRIM56       | -0.113418015 | 0.009997 | 0.017753 |
| TRIM58       | -0.071490914 | 0.105121 | 0.148598 |
| TRIM59       | 0.320895654  | 8.47E-14 | 8.64E-13 |
| TRIM5        | -0.172452584 | 8.37E-05 | 0.000215 |
| TRIM6-TRIM34 | 0.059194934  | 0.179836 | 0.239048 |
| TRIM60       | -0.015344318 | 0.728297 | 0.779794 |
| TRIM61       | -0.120870982 | 0.006025 | 0.011147 |
| TRIM62       | -0.297503066 | 5.51E-12 | 4.28E-11 |
| TRIM63       | -0.315292991 | 2.38E-13 | 2.29E-12 |
| TRIM64       | 0.096850738  | 0.027969 | 0.045212 |
| TRIM65       | -0.038180501 | 0.387224 | 0.462079 |
| TRIM66       | -0.389315119 | 4.39E-20 | 1.16E-18 |
| TRIM67       | -0.201309579 | 4.13E-06 | 1.31E-05 |
| TRIM68       | -0.148361159 | 0.000732 | 0.001597 |
| TRIM69       | 0.060456985  | 0.170716 | 0.228383 |
| TRIM6        | 0.149163233  | 0.000684 | 0.001501 |

|          |              |          |          |
|----------|--------------|----------|----------|
| TRIM71   | -0.274593723 | 2.32E-10 | 1.42E-09 |
| TRIM72   | 0.045560846  | 0.302089 | 0.373764 |
| TRIM74   | -0.223790379 | 2.87E-07 | 1.10E-06 |
| TRIM77   | -0.012556216 | 0.776208 | 0.819893 |
| TRIM78P  | -0.265076165 | 9.93E-10 | 5.53E-09 |
| TRIM7    | 0.018037677  | 0.682996 | 0.73985  |
| TRIM8    | -0.144953457 | 0.00097  | 0.002068 |
| TRIM9    | 0.143574441  | 0.001086 | 0.002296 |
| TRIML1   | -0.016424945 | 0.709997 | 0.764171 |
| TRIML2   | 0.148256943  | 0.000738 | 0.001609 |
| TRIOBP   | -0.288606904 | 2.45E-11 | 1.73E-10 |
| TRIO     | -0.023225874 | 0.598979 | 0.664395 |
| TRIP10   | -0.057419802 | 0.193269 | 0.254332 |
| TRIP11   | 0.013404503  | 0.761531 | 0.807977 |
| TRIP12   | 0.127161034  | 0.003847 | 0.007363 |
| TRIP13   | 0.447073855  | 1.13E-26 | 7.98E-25 |
| TRIP4    | 0.154428738  | 0.000436 | 0.00099  |
| TRIP6    | -0.166571488 | 0.000146 | 0.000362 |
| TRIT1    | 0.163364378  | 0.000197 | 0.000476 |
| TRMT112  | 0.173654028  | 7.45E-05 | 0.000193 |
| TRMT11   | 0.020223682  | 0.647039 | 0.70734  |
| TRMT12   | 0.298730746  | 4.47E-12 | 3.50E-11 |
| TRMT1    | -0.051781618 | 0.240778 | 0.307893 |
| TRMT2A   | -0.066582446 | 0.131299 | 0.181131 |
| TRMT2B   | -0.10516309  | 0.01697  | 0.028692 |
| TRMT5    | 0.344500461  | 8.51E-16 | 1.19E-14 |
| TRMT61A  | 0.056165386  | 0.203194 | 0.265837 |
| TRMT61B  | 0.257810851  | 2.90E-09 | 1.49E-08 |
| TRMT6    | 0.27013646   | 4.61E-10 | 2.69E-09 |
| TRMU     | -0.01507098  | 0.732951 | 0.783769 |
| TRNAU1AP | -0.199956255 | 4.81E-06 | 1.51E-05 |
| TRNP1    | 0.093497638  | 0.033897 | 0.053752 |
| TRNT1    | 0.208010626  | 1.92E-06 | 6.45E-06 |
| TROAP    | 0.450534125  | 4.13E-27 | 3.08E-25 |
| TROVE2   | 0.092616351  | 0.035623 | 0.056237 |
| TRO      | -0.076903919 | 0.081234 | 0.118217 |
| TRPA1    | 0.292029362  | 1.39E-11 | 1.02E-10 |
| TRPC1    | -0.003227329 | 0.941757 | 0.953782 |
| TRPC2    | -0.329666693 | 1.61E-14 | 1.84E-13 |
| TRPC3    | -0.021267926 | 0.630141 | 0.692048 |
| TRPC4AP  | 0.044739813  | 0.310894 | 0.382937 |
| TRPC4    | 0.120809848  | 0.006051 | 0.011186 |
| TRPC5    | -0.122341993 | 0.005434 | 0.010142 |
| TRPC6    | -0.262352661 | 1.49E-09 | 8.05E-09 |

|          |              |          |          |
|----------|--------------|----------|----------|
| TRPC7    | 0.069894486  | 0.113139 | 0.158796 |
| TRPM1    | -0.138714127 | 0.001602 | 0.003282 |
| TRPM2    | 0.048384133  | 0.273085 | 0.34319  |
| TRPM3    | -0.095294182 | 0.0306   | 0.049025 |
| TRPM4    | -0.251978457 | 6.70E-09 | 3.28E-08 |
| TRPM5    | -0.080253931 | 0.068795 | 0.101926 |
| TRPM6    | -0.099580756 | 0.023823 | 0.039046 |
| TRPM7    | -0.17265198  | 8.21E-05 | 0.000211 |
| TRPM8    | 0.079335136  | 0.07204  | 0.106245 |
| TRPS1    | 0.067206097  | 0.127717 | 0.176678 |
| TRPT1    | 0.132223282  | 0.002642 | 0.005214 |
| TRPV1    | -0.157407109 | 0.000336 | 0.000777 |
| TRPV2    | -0.180097446 | 3.94E-05 | 0.000107 |
| TRPV3    | 0.126421864  | 0.004059 | 0.007742 |
| TRPV4    | -0.175721632 | 6.09E-05 | 0.00016  |
| TRPV5    | -0.11537433  | 0.008776 | 0.015732 |
| TRPV6    | -0.374340775 | 1.41E-18 | 3.01E-17 |
| TRRAP    | -0.003976895 | 0.928262 | 0.943749 |
| TRUB1    | 0.319238442  | 1.15E-13 | 1.16E-12 |
| TRUB2    | 0.2631817    | 1.32E-09 | 7.16E-09 |
| TRY6     | 0.048210005  | 0.274817 | 0.345172 |
| TSC1     | -0.297386811 | 5.62E-12 | 4.37E-11 |
| TSC22D1  | -0.05931092  | 0.178983 | 0.238089 |
| TSC22D2  | 0.143293218  | 0.001111 | 0.002345 |
| TSC22D3  | -0.332474606 | 9.32E-15 | 1.10E-13 |
| TSC22D4  | -0.173290648 | 7.72E-05 | 0.0002   |
| TSC2     | -0.312052813 | 4.29E-13 | 3.97E-12 |
| TSEN15   | 0.247070017  | 1.33E-08 | 6.26E-08 |
| TSEN2    | 0.071177683  | 0.106658 | 0.150545 |
| TSEN34   | -0.003553906 | 0.935875 | 0.949702 |
| TSEN54   | -0.047526365 | 0.281689 | 0.352341 |
| TSFM     | 0.263662981  | 1.23E-09 | 6.71E-09 |
| TSG101   | 0.217492804  | 6.25E-07 | 2.27E-06 |
| TSG1     | -0.009297154 | 0.833295 | 0.86754  |
| TSGA10IP | -0.239958613 | 3.53E-08 | 1.55E-07 |
| TSGA10   | -0.228602131 | 1.56E-07 | 6.24E-07 |
| TSGA13   | 0.025559232  | 0.562781 | 0.631994 |
| TSGA14   | 0.167986745  | 0.000128 | 0.00032  |
| TSHB     | -0.076306931 | 0.083631 | 0.121237 |
| TSHR     | 0.009216067  | 0.834728 | 0.868646 |
| TSHZ1    | -0.133275578 | 0.00244  | 0.004844 |
| TSHZ2    | -0.090819808 | 0.039372 | 0.061539 |
| TSHZ3    | -0.069303698 | 0.116225 | 0.162591 |
| TSIX     | -0.202752428 | 3.51E-06 | 1.13E-05 |

|             |              |          |          |
|-------------|--------------|----------|----------|
| TSKS        | -0.075420253 | 0.087296 | 0.126011 |
| TSKU        | 0.257883354  | 2.87E-09 | 1.48E-08 |
| TSLP        | -0.329180494 | 1.76E-14 | 2.01E-13 |
| TSNARE1     | -0.218843267 | 5.30E-07 | 1.95E-06 |
| TSNAX-DISC1 | 0.134822162  | 0.002168 | 0.004347 |
| TSNAXIP1    | -0.26489134  | 1.02E-09 | 5.67E-09 |
| TSNAX       | 0.245752756  | 1.60E-08 | 7.43E-08 |
| TSN         | 0.333380846  | 7.81E-15 | 9.38E-14 |
| TSPAN10     | -0.054464781 | 0.217234 | 0.281551 |
| TSPAN11     | -0.059671514 | 0.176351 | 0.235119 |
| TSPAN12     | -0.045729404 | 0.300302 | 0.371806 |
| TSPAN13     | 0.019349643  | 0.661323 | 0.720199 |
| TSPAN14     | -0.044324021 | 0.315417 | 0.387757 |
| TSPAN15     | 0.002342444  | 0.957708 | 0.967682 |
| TSPAN16     | -0.024470676 | 0.579537 | 0.646705 |
| TSPAN17     | -0.044926295 | 0.308879 | 0.380775 |
| TSPAN18     | -0.101471335 | 0.021273 | 0.035275 |
| TSPAN19     | -0.168794678 | 0.000119 | 0.000298 |
| TSPAN1      | -0.028276487 | 0.522001 | 0.59394  |
| TSPAN2      | -0.106907359 | 0.015217 | 0.026003 |
| TSPAN31     | -0.08712834  | 0.048131 | 0.07385  |
| TSPAN32     | -0.436333145 | 2.38E-25 | 1.40E-23 |
| TSPAN33     | -0.066052695 | 0.134402 | 0.185041 |
| TSPAN3      | -0.248424828 | 1.11E-08 | 5.25E-08 |
| TSPAN4      | -0.31029677  | 5.88E-13 | 5.34E-12 |
| TSPAN5      | 0.096139866  | 0.029145 | 0.046905 |
| TSPAN6      | 0.097302146  | 0.027243 | 0.044124 |
| TSPAN7      | -0.208539919 | 1.81E-06 | 6.10E-06 |
| TSPAN8      | -0.004330813 | 0.921898 | 0.938902 |
| TSPAN9      | -0.278079563 | 1.34E-10 | 8.47E-10 |
| TSPO2       | 0.125757137  | 0.004259 | 0.008093 |
| TSPO        | -0.079664201 | 0.070864 | 0.104665 |
| TSPY1       | 0.030771731  | 0.485934 | 0.559432 |
| TSPY2       | 0.099752054  | 0.023581 | 0.038698 |
| TSPY3       | 0.050937192  | 0.248546 | 0.316429 |
| TSPY4       | 0.113301929  | 0.010074 | 0.017877 |
| TSPYL1      | -0.263453537 | 1.27E-09 | 6.90E-09 |
| TSPYL2      | -0.378185194 | 5.90E-19 | 1.33E-17 |
| TSPYL3      | -0.093487668 | 0.033916 | 0.053769 |
| TSPYL4      | -0.23897483  | 4.02E-08 | 1.76E-07 |
| TSPYL5      | -0.045420042 | 0.303587 | 0.375376 |
| TSPYL6      | -0.121422383 | 0.005797 | 0.010756 |
| TSR1        | 0.395060845  | 1.10E-20 | 3.18E-19 |
| TSR2        | -0.053491331 | 0.225578 | 0.290875 |

|        |              |          |          |
|--------|--------------|----------|----------|
| TSSC1  | 0.351415261  | 2.05E-16 | 3.11E-15 |
| TSSC4  | -0.007743254 | 0.860845 | 0.890564 |
| TSSK1B | -0.012970971 | 0.769021 | 0.814368 |
| TSSK3  | -0.366390002 | 8.31E-18 | 1.58E-16 |
| TSSK4  | -0.240327215 | 3.36E-08 | 1.48E-07 |
| TSSK6  | -0.12971832  | 0.003187 | 0.006194 |
| TSTA3  | 0.065627857  | 0.136931 | 0.188121 |
| TSTD1  | -0.23998208  | 3.52E-08 | 1.55E-07 |
| TSTD2  | -0.065918354 | 0.135198 | 0.186034 |
| TST    | -0.093935112 | 0.033068 | 0.052528 |
| TTBK1  | -0.117286588 | 0.007713 | 0.013986 |
| TTBK2  | -0.25399005  | 5.03E-09 | 2.51E-08 |
| TTC12  | -0.262892596 | 1.38E-09 | 7.45E-09 |
| TTC13  | -0.058191876 | 0.187339 | 0.247621 |
| TTC14  | -0.275346453 | 2.06E-10 | 1.27E-09 |
| TTC15  | -0.116662532 | 0.008046 | 0.014551 |
| TTC16  | -0.354653432 | 1.04E-16 | 1.65E-15 |
| TTC17  | -0.04956837  | 0.261504 | 0.330401 |
| TTC18  | -0.394334355 | 1.32E-20 | 3.73E-19 |
| TTC19  | -0.161402651 | 0.000235 | 0.000561 |
| TTC1   | 0.003862758  | 0.930316 | 0.945548 |
| TTC21A | -0.422992881 | 9.04E-24 | 4.15E-22 |
| TTC21B | -0.166172009 | 0.000152 | 0.000375 |
| TTC22  | -0.099393895 | 0.024089 | 0.039446 |
| TTC23L | -0.363972998 | 1.41E-17 | 2.57E-16 |
| TTC23  | -0.210683719 | 1.41E-06 | 4.82E-06 |
| TTC24  | -0.093273187 | 0.03433  | 0.054347 |
| TTC25  | -0.290973846 | 1.66E-11 | 1.20E-10 |
| TTC26  | 0.059148899  | 0.180176 | 0.239436 |
| TTC27  | 0.258332214  | 2.69E-09 | 1.39E-08 |
| TTC28  | -0.227795591 | 1.73E-07 | 6.87E-07 |
| TTC29  | -0.197495859 | 6.32E-06 | 1.95E-05 |
| TTC30A | -0.043136831 | 0.328566 | 0.401969 |
| TTC30B | -0.060024927 | 0.173799 | 0.232103 |
| TTC31  | -0.272566594 | 3.18E-10 | 1.90E-09 |
| TTC32  | 0.01085535   | 0.805871 | 0.844753 |
| TTC33  | 0.054465116  | 0.217232 | 0.281551 |
| TTC35  | 0.118873203  | 0.00692  | 0.012655 |
| TTC36  | -0.06024096  | 0.172252 | 0.230275 |
| TTC37  | -0.082217485 | 0.062261 | 0.093225 |
| TTC38  | -0.11996817  | 0.006416 | 0.011808 |
| TTC39A | -0.01153468  | 0.793988 | 0.834923 |
| TTC39B | -0.032371158 | 0.463543 | 0.537461 |
| TTC39C | 0.17658753   | 5.59E-05 | 0.000148 |

|        |              |          |          |
|--------|--------------|----------|----------|
| TTC3   | -0.234153481 | 7.62E-08 | 3.19E-07 |
| TTC4   | 0.221955131  | 3.61E-07 | 1.36E-06 |
| TTC5   | 0.216734336  | 6.85E-07 | 2.47E-06 |
| TTC7A  | -0.141677867 | 0.001266 | 0.002644 |
| TTC7B  | 0.014635035  | 0.740393 | 0.789849 |
| TTC8   | 0.228315105  | 1.62E-07 | 6.45E-07 |
| TTC9B  | 0.148866645  | 0.000701 | 0.001535 |
| TTC9C  | 0.25357088   | 5.34E-09 | 2.66E-08 |
| TTC9   | 0.032774201  | 0.457992 | 0.531872 |
| TTF1   | 0.008093755  | 0.854615 | 0.885218 |
| TTF2   | 0.247110498  | 1.33E-08 | 6.22E-08 |
| TTK    | 0.501716026  | 3.48E-34 | 8.38E-32 |
| TTLL10 | -0.272821709 | 3.05E-10 | 1.83E-09 |
| TTLL11 | -0.177331029 | 5.20E-05 | 0.000138 |
| TTLL12 | 0.233435341  | 8.38E-08 | 3.49E-07 |
| TTLL13 | -0.106903408 | 0.015221 | 0.026007 |
| TTLL1  | -0.321788215 | 7.17E-14 | 7.43E-13 |
| TTLL2  | -0.218972379 | 5.22E-07 | 1.92E-06 |
| TTLL3  | -0.405265051 | 8.89E-22 | 3.05E-20 |
| TTLL4  | 0.119335804  | 0.006703 | 0.012296 |
| TTLL5  | 0.084548684  | 0.055176 | 0.083607 |
| TTLL6  | -0.242017544 | 2.67E-08 | 1.20E-07 |
| TTLL7  | 0.046699149  | 0.290158 | 0.361306 |
| TTLL8  | 0.086698985  | 0.049248 | 0.075448 |
| TTLL9  | -0.344801585 | 8.01E-16 | 1.12E-14 |
| TTL    | 0.297009511  | 6.00E-12 | 4.63E-11 |
| TTN    | -0.29398392  | 1.00E-11 | 7.48E-11 |
| TTPAL  | 0.225620898  | 2.28E-07 | 8.88E-07 |
| TTPA   | 0.003710686  | 0.933053 | 0.947655 |
| TTR    | -0.05129286  | 0.245253 | 0.312855 |
| TTY10  | -0.069013897 | 0.117763 | 0.164432 |
| TTY14  | 0.046001903  | 0.297428 | 0.368682 |
| TTY15  | 0.161734294  | 0.000228 | 0.000546 |
| TTY16  | 0.016294371  | 0.712199 | 0.765881 |
| TTY1B  | 0.04454715   | 0.312984 | 0.385075 |
| TTY2   | -0.015135675 | 0.731848 | 0.782853 |
| TTY4C  | -0.01265135  | 0.774557 | 0.818886 |
| TTY5   | -0.058115117 | 0.187922 | 0.248294 |
| TTY6B  | 0.000805887  | 0.985444 | 0.989007 |
| TTY6   | -0.022407906 | 0.611913 | 0.67604  |
| TTY7   | 0.025394611  | 0.5653   | 0.634181 |
| TTY8   | -0.09814862  | 0.025926 | 0.042193 |
| TTY9B  | -0.039205502 | 0.374598 | 0.449454 |
| TYH1   | 0.093558883  | 0.03378  | 0.053574 |



|         |              |          |          |
|---------|--------------|----------|----------|
| TTYH2   | -0.33386739  | 7.10E-15 | 8.60E-14 |
| TTYH3   | 0.011448148  | 0.795499 | 0.836248 |
| TUBA1A  | -0.043074919 | 0.329261 | 0.402672 |
| TUBA1B  | 0.431012127  | 1.04E-24 | 5.49E-23 |
| TUBA1C  | 0.563315599  | 1.86E-44 | 3.10E-41 |
| TUBA3C  | 0.110297099  | 0.012259 | 0.021346 |
| TUBA3D  | -0.068953833 | 0.118083 | 0.16481  |
| TUBA3E  | 0.019730256  | 0.655087 | 0.714615 |
| TUBA4A  | 0.164519569  | 0.000177 | 0.000432 |
| TUBA4B  | -0.229357456 | 1.42E-07 | 5.71E-07 |
| TUBA8   | -0.17799145  | 4.87E-05 | 0.00013  |
| TUBAL3  | 0.191610577  | 1.20E-05 | 3.54E-05 |
| TUBB1   | -0.218514624 | 5.51E-07 | 2.02E-06 |
| TUBB2A  | 0.094757217  | 0.031555 | 0.050394 |
| TUBB2B  | 0.042095874  | 0.340383 | 0.414498 |
| TUBB2C  | 0.10521774   | 0.016913 | 0.028602 |
| TUBB3   | 0.374063205  | 1.50E-18 | 3.19E-17 |
| TUBB4Q  | -0.080616052 | 0.06755  | 0.100273 |
| TUBB4   | 0.144908953  | 0.000974 | 0.002075 |
| TUBB6   | 0.072614771  | 0.099751 | 0.14196  |
| TUBB8   | -0.1113088   | 0.011481 | 0.020128 |
| TUBBP5  | -0.134176385 | 0.002278 | 0.004546 |
| TUBB    | 0.345765323  | 6.58E-16 | 9.33E-15 |
| TUBD1   | 0.079937382  | 0.0699   | 0.103355 |
| TUBE1   | -0.051234456 | 0.245792 | 0.313442 |
| TUBG1   | 0.307701888  | 9.34E-13 | 8.23E-12 |
| TUBG2   | -0.276147859 | 1.82E-10 | 1.13E-09 |
| TUBGCP2 | -0.08617992  | 0.050628 | 0.077396 |
| TUBGCP3 | -0.074247586 | 0.092341 | 0.132357 |
| TUBGCP4 | 0.0914153    | 0.038094 | 0.059723 |
| TUBGCP5 | -0.033108366 | 0.453418 | 0.527635 |
| TUBGCP6 | -0.504142877 | 1.50E-34 | 3.89E-32 |
| TUB     | -0.344704207 | 8.17E-16 | 1.14E-14 |
| TUFM    | 0.122726115  | 0.005289 | 0.009891 |
| TUFT1   | 0.119834257  | 0.006475 | 0.011908 |
| TUG1    | -0.068487183 | 0.120598 | 0.167992 |
| TULP1   | 0.095271833  | 0.030639 | 0.049076 |
| TULP2   | 0.003181281  | 0.942586 | 0.954428 |
| TULP3   | 0.080065353  | 0.069451 | 0.102814 |
| TULP4   | -0.220268149 | 4.45E-07 | 1.66E-06 |
| TUSC1   | -0.144855342 | 0.000978 | 0.002083 |
| TUSC2   | -0.003214999 | 0.941979 | 0.953958 |
| TUSC3   | 0.030356475  | 0.491842 | 0.565094 |
| TUSC5   | -0.036924372 | 0.403044 | 0.477735 |

|           |              |          |          |
|-----------|--------------|----------|----------|
| TUT1      | -0.089177719 | 0.043086 | 0.066808 |
| TWF1      | 0.497742506  | 1.36E-33 | 2.90E-31 |
| TWF2      | -0.041787055 | 0.34394  | 0.418142 |
| TWIST1    | 0.168432332  | 0.000123 | 0.000308 |
| TWIST2    | -0.008311131 | 0.850756 | 0.882134 |
| TWISTNB   | 0.279458854  | 1.08E-10 | 6.90E-10 |
| TWSG1     | 0.1783941    | 4.68E-05 | 0.000125 |
| TXK       | -0.222461262 | 3.39E-07 | 1.29E-06 |
| TXLNA     | -0.177286824 | 5.22E-05 | 0.000139 |
| TXLNB     | -0.159325028 | 0.000283 | 0.000666 |
| TXLNG     | -0.069323493 | 0.11612  | 0.162468 |
| TXN2      | 0.036989254  | 0.402218 | 0.476869 |
| TXNDC11   | -0.23789105  | 4.65E-08 | 2.01E-07 |
| TXNDC12   | 0.181965303  | 3.27E-05 | 8.98E-05 |
| TXNDC15   | -0.111622497 | 0.011248 | 0.019758 |
| TXNDC16   | 0.014284282  | 0.746399 | 0.79506  |
| TXNDC17   | 0.123936535  | 0.004853 | 0.009144 |
| TXNDC2    | 0.156144701  | 0.000376 | 0.00086  |
| TXNDC3    | -0.202057935 | 3.80E-06 | 1.21E-05 |
| TXNDC5    | 0.149018297  | 0.000693 | 0.001517 |
| TXNDC6    | -0.294113987 | 9.80E-12 | 7.35E-11 |
| TXNDC9    | 0.392131072  | 2.24E-20 | 6.18E-19 |
| TXNIP     | -0.347600774 | 4.52E-16 | 6.58E-15 |
| TXNL1     | 0.28342497   | 5.71E-11 | 3.80E-10 |
| TXNL4A    | 0.216808763  | 6.78E-07 | 2.45E-06 |
| TXNL4B    | 0.148784598  | 0.000706 | 0.001545 |
| TXNRD1    | 0.356744282  | 6.68E-17 | 1.10E-15 |
| TXNRD2    | -0.110491813 | 0.012106 | 0.021097 |
| TXNRD3IT1 | -0.052914552 | 0.230627 | 0.296649 |
| TXN       | 0.271959385  | 3.49E-10 | 2.07E-09 |
| TYK2      | -0.348091823 | 4.08E-16 | 5.98E-15 |
| TYMP      | -7.63E-05    | 0.998622 | 0.999165 |
| TYMS      | 0.377752644  | 6.51E-19 | 1.45E-17 |
| TYRO3     | 0.075140733  | 0.088478 | 0.127524 |
| TYROBP    | -0.170577323 | 0.0001   | 0.000255 |
| TYRP1     | -0.254065289 | 4.98E-09 | 2.48E-08 |
| TYR       | -0.079976857 | 0.069761 | 0.103211 |
| TYSND1    | 0.061952032  | 0.160364 | 0.216184 |
| TYW1B     | -0.107990805 | 0.01421  | 0.024445 |
| TYW1      | 0.051913587  | 0.23958  | 0.306459 |
| TYW3      | 0.001428919  | 0.974194 | 0.980621 |
| T         | -0.226955862 | 1.93E-07 | 7.59E-07 |
| U2AF1L4   | -0.158887955 | 0.000295 | 0.000689 |
| U2AF1     | -0.025976624 | 0.556418 | 0.625833 |

|         |              |          |          |
|---------|--------------|----------|----------|
| U2AF2   | 0.181892497  | 3.29E-05 | 9.05E-05 |
| UACA    | -0.013812686 | 0.754499 | 0.801917 |
| UAP1L1  | -0.234499109 | 7.29E-08 | 3.06E-07 |
| UAP1    | 0.313464668  | 3.32E-13 | 3.13E-12 |
| UBA1    | 0.02365039   | 0.592316 | 0.658245 |
| UBA2    | 0.373304693  | 1.79E-18 | 3.70E-17 |
| UBA3    | 0.151912764  | 0.000542 | 0.001207 |
| UBA52   | 0.067264491  | 0.127386 | 0.176257 |
| UBA5    | 0.133350899  | 0.002426 | 0.004817 |
| UBA6    | 0.291388857  | 1.55E-11 | 1.12E-10 |
| UBA7    | -0.446746536 | 1.24E-26 | 8.71E-25 |
| UBAC1   | 0.10502593   | 0.017115 | 0.028916 |
| UBAC2   | 0.144892708  | 0.000975 | 0.002078 |
| UBAP1   | 0.105505322  | 0.016613 | 0.02814  |
| UBAP2L  | 0.039766764  | 0.367793 | 0.442435 |
| UBAP2   | 0.116751313  | 0.007998 | 0.014469 |
| UBASH3A | -0.191395732 | 1.22E-05 | 3.62E-05 |
| UBASH3B | -0.046337505 | 0.293914 | 0.365255 |
| UBB     | 0.044082201  | 0.318067 | 0.390655 |
| UBC     | 0.117054139  | 0.007836 | 0.014194 |
| UBD     | 0.054212272  | 0.219377 | 0.283905 |
| UBE2A   | 0.125303846  | 0.004401 | 0.008344 |
| UBE2B   | 0.032629496  | 0.459981 | 0.53392  |
| UBE2CBP | 0.122876454  | 0.005233 | 0.009799 |
| UBE2C   | 0.487268585  | 4.58E-32 | 7.38E-30 |
| UBE2D1  | 0.351832253  | 1.88E-16 | 2.87E-15 |
| UBE2D2  | 0.173348268  | 7.68E-05 | 0.000199 |
| UBE2D3  | 0.152453165  | 0.000517 | 0.001157 |
| UBE2D4  | -0.014050996 | 0.750402 | 0.798614 |
| UBE2DNL | -0.044674935 | 0.311597 | 0.383604 |
| UBE2E1  | 0.263505884  | 1.26E-09 | 6.85E-09 |
| UBE2E2  | 0.040820542  | 0.355226 | 0.429727 |
| UBE2E3  | 0.228532371  | 1.58E-07 | 6.29E-07 |
| UBE2F   | 0.323642468  | 5.06E-14 | 5.36E-13 |
| UBE2G1  | 0.294426946  | 9.29E-12 | 6.99E-11 |
| UBE2G2  | -0.373576835 | 1.68E-18 | 3.51E-17 |
| UBE2H   | 0.134214576  | 0.002271 | 0.004534 |
| UBE2I   | 0.118218565  | 0.007238 | 0.013196 |
| UBE2J1  | 0.122809338  | 0.005258 | 0.009841 |
| UBE2J2  | 0.0683155    | 0.121534 | 0.169177 |
| UBE2K   | 0.402859902  | 1.62E-21 | 5.38E-20 |
| UBE2L3  | 0.187529113  | 1.84E-05 | 5.29E-05 |
| UBE2L6  | 0.018046473  | 0.68285  | 0.739732 |
| UBE2MP1 | 0.288826864  | 2.36E-11 | 1.67E-10 |

|          |              |          |          |
|----------|--------------|----------|----------|
| UBE2M    | 0.219180628  | 5.08E-07 | 1.88E-06 |
| UBE2NL   | 0.250574327  | 8.17E-09 | 3.96E-08 |
| UBE2N    | 0.439533212  | 9.71E-26 | 6.10E-24 |
| UBE2O    | -0.00359166  | 0.935195 | 0.94906  |
| UBE2Q1   | 0.09105044   | 0.038872 | 0.060844 |
| UBE2Q2P1 | -0.182260305 | 3.17E-05 | 8.73E-05 |
| UBE2Q2   | 0.202142408  | 3.76E-06 | 1.20E-05 |
| UBE2QL1  | -0.036548536 | 0.407852 | 0.482604 |
| UBE2R2   | 0.323174463  | 5.53E-14 | 5.80E-13 |
| UBE2S    | 0.37001753   | 3.73E-18 | 7.41E-17 |
| UBE2T    | 0.535250838  | 1.63E-39 | 1.25E-36 |
| UBE2U    | -0.165471959 | 0.000162 | 0.000398 |
| UBE2V1   | 0.230342852  | 1.25E-07 | 5.08E-07 |
| UBE2V2   | 0.441186645  | 6.09E-26 | 3.90E-24 |
| UBE2W    | 0.245218024  | 1.72E-08 | 7.96E-08 |
| UBE2Z    | 0.171946173  | 8.79E-05 | 0.000225 |
| UBE3A    | 0.13464792   | 0.002197 | 0.004401 |
| UBE3B    | -0.057976621 | 0.188978 | 0.249426 |
| UBE3C    | 0.254881785  | 4.43E-09 | 2.22E-08 |
| UBE4A    | -0.01322429  | 0.764642 | 0.810632 |
| UBE4B    | -0.142826693 | 0.001154 | 0.002427 |
| UBFD1    | 0.182455404  | 3.11E-05 | 8.58E-05 |
| UBIAD1   | -0.010268533 | 0.816173 | 0.853359 |
| UBL3     | -0.22676283  | 1.98E-07 | 7.77E-07 |
| UBL4A    | 0.307600057  | 9.51E-13 | 8.36E-12 |
| UBL4B    | -0.032047445 | 0.468028 | 0.541803 |
| UBL5     | 0.131469266  | 0.002797 | 0.005491 |
| UBL7     | 0.01846199   | 0.675957 | 0.733537 |
| UBLCP1   | -0.023338836 | 0.597203 | 0.662829 |
| UBN1     | -0.146404806 | 0.000861 | 0.001852 |
| UBN2     | -0.22042432  | 4.36E-07 | 1.63E-06 |
| UBOX5    | -0.176909542 | 5.42E-05 | 0.000143 |
| UBP1     | -0.08573024  | 0.051849 | 0.079045 |
| UBQLN1   | 0.258139261  | 2.77E-09 | 1.43E-08 |
| UBQLN2   | 0.068574255  | 0.120126 | 0.167404 |
| UBQLN3   | -0.107368028 | 0.014781 | 0.025347 |
| UBQLN4   | 0.152998566  | 0.000494 | 0.001108 |
| UBQLNL   | -0.343062708 | 1.14E-15 | 1.56E-14 |
| UBR1     | -0.056736217 | 0.198633 | 0.260429 |
| UBR2     | -0.052982889 | 0.230025 | 0.29596  |
| UBR3     | -0.13727176  | 0.001794 | 0.003645 |
| UBR4     | -0.121402331 | 0.005805 | 0.010769 |
| UBR5     | 0.141097534  | 0.001326 | 0.002758 |
| UBR7     | 0.084074289  | 0.056561 | 0.085472 |

|         |              |          |          |
|---------|--------------|----------|----------|
| UBTD1   | -0.333552335 | 7.55E-15 | 9.08E-14 |
| UBTD2   | 0.025585715  | 0.562376 | 0.631717 |
| UBTFL1  | -0.046884771 | 0.288243 | 0.359212 |
| UBTF    | -0.023344123 | 0.59712  | 0.662829 |
| UBXN10  | -0.178439195 | 4.65E-05 | 0.000125 |
| UBXN11  | -0.380731318 | 3.28E-19 | 7.67E-18 |
| UBXN1   | -0.038511567 | 0.383118 | 0.457753 |
| UBXN2A  | 0.315527988  | 2.28E-13 | 2.20E-12 |
| UBXN2B  | 0.091495755  | 0.037924 | 0.059513 |
| UBXN4   | 0.181231306  | 3.52E-05 | 9.64E-05 |
| UBXN6   | -0.186095076 | 2.14E-05 | 6.08E-05 |
| UBXN7   | 0.089020081  | 0.043457 | 0.06733  |
| UBXN8   | 0.041720423  | 0.344711 | 0.418926 |
| UCA1    | 0.104983693  | 0.01716  | 0.028977 |
| UCHL1   | 0.2582082    | 2.74E-09 | 1.41E-08 |
| UCHL3   | 0.359958577  | 3.36E-17 | 5.82E-16 |
| UCHL5   | 0.412500238  | 1.41E-22 | 5.35E-21 |
| UCK1    | -0.140019205 | 0.001445 | 0.002986 |
| UCK2    | 0.472455453  | 5.39E-30 | 6.02E-28 |
| UCKL1AS | -0.248888944 | 1.04E-08 | 4.95E-08 |
| UCKL1   | -0.060980095 | 0.167039 | 0.224063 |
| UCMA    | 0.000795794  | 0.985626 | 0.98914  |
| UCN2    | 0.153098697  | 0.000489 | 0.001099 |
| UCN3    | -0.176480022 | 5.65E-05 | 0.000149 |
| UCN     | -0.10672972  | 0.015388 | 0.026254 |
| UCP1    | 0.072437698  | 0.100582 | 0.143011 |
| UCP2    | -0.04974545  | 0.259802 | 0.328666 |
| UCP3    | -0.317676383 | 1.54E-13 | 1.52E-12 |
| UEVLD   | 0.225318762  | 2.37E-07 | 9.20E-07 |
| UFC1    | 0.067584508  | 0.125581 | 0.173976 |
| UFD1L   | 0.263761612  | 1.21E-09 | 6.62E-09 |
| UFM1    | 0.05100747   | 0.247893 | 0.315738 |
| UFSP1   | 0.119247056  | 0.006744 | 0.012367 |
| UFSP2   | -0.093467478 | 0.033955 | 0.053822 |
| UGCG    | -0.047642543 | 0.280513 | 0.351155 |
| UGDH    | 0.351124389  | 2.18E-16 | 3.29E-15 |
| UGGT1   | 0.232949203  | 8.93E-08 | 3.70E-07 |
| UGGT2   | 0.166396757  | 0.000149 | 0.000368 |
| UGP2    | 0.287349349  | 3.02E-11 | 2.10E-10 |
| UGT1A10 | -0.03624642  | 0.411741 | 0.486426 |
| UGT1A1  | 0.144297868  | 0.001024 | 0.002175 |
| UGT1A3  | 0.244032123  | 2.03E-08 | 9.27E-08 |
| UGT1A4  | 0.104994832  | 0.017148 | 0.028963 |
| UGT1A5  | 0.090374883  | 0.04035  | 0.062965 |

|           |              |          |          |
|-----------|--------------|----------|----------|
| UGT1A6    | 0.066728219  | 0.130455 | 0.180104 |
| UGT1A7    | 0.063122195  | 0.152598 | 0.206886 |
| UGT1A8    | -0.023581317 | 0.593397 | 0.659301 |
| UGT1A9    | 0.103279951  | 0.019059 | 0.031902 |
| UGT2A1    | 0.037593539  | 0.394569 | 0.46948  |
| UGT2A3    | 0.012024017  | 0.785457 | 0.827651 |
| UGT2B10   | 0.127189177  | 0.003839 | 0.007349 |
| UGT2B11   | 0.152106597  | 0.000533 | 0.001189 |
| UGT2B15   | -0.058343277 | 0.186192 | 0.246236 |
| UGT2B28   | 0.122853862  | 0.005241 | 0.009812 |
| UGT2B4    | 0.148032865  | 0.000752 | 0.001637 |
| UGT2B7    | 0.08697609   | 0.048525 | 0.074437 |
| UGT3A1    | 0.170751729  | 9.85E-05 | 0.000251 |
| UGT3A2    | 0.008043049  | 0.855516 | 0.886105 |
| UGT8      | 0.007237464  | 0.869851 | 0.898439 |
| UHMK1     | 0.100192223  | 0.022971 | 0.037808 |
| UHRF1BP1L | 0.243388182  | 2.22E-08 | 1.01E-07 |
| UHRF1BP1  | 0.082001046  | 0.062955 | 0.094145 |
| UHRF1     | 0.436609845  | 2.20E-25 | 1.30E-23 |
| UHRF2     | 0.148731473  | 0.000709 | 0.001551 |
| UIMC1     | -0.001787776 | 0.967716 | 0.97539  |
| ULBP1     | -0.116777149 | 0.007984 | 0.014446 |
| ULBP2     | -0.010776988 | 0.807245 | 0.845838 |
| ULBP3     | -0.111725763 | 0.011173 | 0.019631 |
| ULK1      | 0.005116122  | 0.907794 | 0.927895 |
| ULK2      | -0.274929669 | 2.20E-10 | 1.35E-09 |
| ULK3      | -0.27382447  | 2.61E-10 | 1.58E-09 |
| ULK4      | -0.046880193 | 0.28829  | 0.359249 |
| UMODL1    | 0.001464884  | 0.973545 | 0.980214 |
| UMOD      | 0.068736438  | 0.11925  | 0.166299 |
| UMPS      | 0.306420548  | 1.17E-12 | 1.01E-11 |
| UNC119B   | -0.096567389 | 0.028433 | 0.045891 |
| UNC119    | -0.032000912 | 0.468675 | 0.542373 |
| UNC13A    | 0.001693407  | 0.96942  | 0.976996 |
| UNC13B    | -0.254297229 | 4.82E-09 | 2.41E-08 |
| UNC13C    | -0.114081768 | 0.009567 | 0.017051 |
| UNC13D    | -0.016943574 | 0.701272 | 0.756777 |
| UNC45A    | -0.103894688 | 0.018354 | 0.03082  |
| UNC45B    | -0.351777785 | 1.90E-16 | 2.90E-15 |
| UNC50     | 0.079873899  | 0.070123 | 0.103662 |
| UNC5A     | -0.039911691 | 0.366049 | 0.440758 |
| UNC5B     | -0.082157381 | 0.062453 | 0.093464 |
| UNC5CL    | -0.109337894 | 0.013039 | 0.022593 |
| UNC5C     | -0.162412602 | 0.000214 | 0.000516 |

|         |              |          |          |
|---------|--------------|----------|----------|
| UNC5D   | 0.199909539  | 4.83E-06 | 1.52E-05 |
| UNC80   | -0.136472157 | 0.001909 | 0.003861 |
| UNC93A  | 0.060845567  | 0.167979 | 0.225234 |
| UNC93B1 | -0.178147086 | 4.79E-05 | 0.000128 |
| UNG     | 0.442287277  | 4.45E-26 | 2.91E-24 |
| UNKL    | -0.191319859 | 1.23E-05 | 3.64E-05 |
| UNK     | -0.10652586  | 0.015586 | 0.026559 |
| UOX     | 0.103583392  | 0.018708 | 0.031368 |
| UPB1    | -0.263282757 | 1.30E-09 | 7.07E-09 |
| UPF0639 | -0.156997359 | 0.000348 | 0.000803 |
| UPF1    | -0.217028296 | 6.61E-07 | 2.39E-06 |
| UPF2    | 0.020589678  | 0.641095 | 0.702148 |
| UPF3A   | -0.186835457 | 1.98E-05 | 5.66E-05 |
| UPF3B   | 0.049993111  | 0.257434 | 0.326125 |
| UPK1A   | 0.014471233  | 0.743196 | 0.792257 |
| UPK1B   | 0.122426881  | 0.005402 | 0.010089 |
| UPK2    | 0.082892067  | 0.060137 | 0.09033  |
| UPK3A   | -0.17764804  | 5.04E-05 | 0.000134 |
| UPK3BL  | -0.086164886 | 0.050668 | 0.077452 |
| UPK3B   | -0.206618833 | 2.26E-06 | 7.48E-06 |
| UPP1    | 0.120762439  | 0.006071 | 0.011217 |
| UPP2    | -0.109940034 | 0.012544 | 0.021794 |
| UPRT    | -0.222097405 | 3.55E-07 | 1.34E-06 |
| UQCC    | 0.005291601  | 0.904646 | 0.925292 |
| UQCR10  | -0.014322466 | 0.745745 | 0.794475 |
| UQCR11  | 0.114496104  | 0.009307 | 0.016617 |
| UQCRB   | 0.238512674  | 4.28E-08 | 1.86E-07 |
| UQCRC1  | 0.204206764  | 2.98E-06 | 9.67E-06 |
| UQCRC2  | 0.182257613  | 3.17E-05 | 8.74E-05 |
| UQCRFS1 | 0.272966228  | 2.98E-10 | 1.79E-09 |
| UQCRHL  | 0.310943174  | 5.24E-13 | 4.78E-12 |
| UQCRH   | 0.285258233  | 4.24E-11 | 2.88E-10 |
| UQCRQ   | 0.19471714   | 8.56E-06 | 2.59E-05 |
| URB1    | 0.039543764  | 0.370488 | 0.445298 |
| URB2    | 0.417232445  | 4.14E-23 | 1.73E-21 |
| URGCP   | -0.094110112 | 0.032741 | 0.052091 |
| URM1    | 0.147417     | 0.000792 | 0.001715 |
| UROC1   | -0.129273586 | 0.003294 | 0.006385 |
| UROD    | -0.078563476 | 0.074862 | 0.10996  |
| UROS    | 0.059918406  | 0.174565 | 0.232986 |
| USE1    | -0.05414869  | 0.219919 | 0.284532 |
| USF1    | -0.071756912 | 0.10383  | 0.146948 |
| USF2    | -0.114581701 | 0.009254 | 0.016533 |
| USH1C   | 0.046184611  | 0.295512 | 0.366829 |

|          |              |          |          |
|----------|--------------|----------|----------|
| USH1G    | -0.078030788 | 0.076861 | 0.112607 |
| USH2A    | -0.079951647 | 0.069849 | 0.103319 |
| USHBP1   | -0.364803156 | 1.18E-17 | 2.17E-16 |
| USMG5    | 0.352671831  | 1.58E-16 | 2.44E-15 |
| USO1     | 0.222584996  | 3.34E-07 | 1.27E-06 |
| USP10    | 0.266634321  | 7.85E-10 | 4.44E-09 |
| USP11    | -0.12839879  | 0.003513 | 0.006775 |
| USP12    | -0.072331965 | 0.101081 | 0.143679 |
| USP13    | -0.134770102 | 0.002177 | 0.004363 |
| USP14    | 0.363355483  | 1.61E-17 | 2.91E-16 |
| USP15    | 0.208257954  | 1.87E-06 | 6.28E-06 |
| USP16    | -0.030633226 | 0.4879   | 0.561243 |
| USP17L2  | -0.160542677 | 0.000254 | 0.000602 |
| USP17L6P | 0.009100716  | 0.836767 | 0.870384 |
| USP17    | 0.023126494  | 0.600544 | 0.665872 |
| USP18    | 0.050274101  | 0.254766 | 0.323287 |
| USP19    | -0.231314546 | 1.10E-07 | 4.52E-07 |
| USP1     | 0.275839492  | 1.91E-10 | 1.18E-09 |
| USP20    | -0.364473706 | 1.26E-17 | 2.32E-16 |
| USP21    | -0.05749609  | 0.192677 | 0.25367  |
| USP22    | -0.078017598 | 0.076911 | 0.112664 |
| USP24    | -0.109596634 | 0.012825 | 0.022238 |
| USP25    | -0.105275857 | 0.016852 | 0.028506 |
| USP26    | -0.040051668 | 0.364369 | 0.439026 |
| USP27X   | -0.208292112 | 1.86E-06 | 6.26E-06 |
| USP28    | -0.00114481  | 0.979324 | 0.98471  |
| USP29    | -0.026153886 | 0.553727 | 0.623402 |
| USP2     | -0.315738089 | 2.20E-13 | 2.12E-12 |
| USP30    | -0.050036928 | 0.257017 | 0.325741 |
| USP31    | 0.070738294  | 0.108843 | 0.153348 |
| USP32    | 0.124312971  | 0.004725 | 0.008919 |
| USP33    | 0.092500673  | 0.035854 | 0.056572 |
| USP34    | -0.170659849 | 9.94E-05 | 0.000253 |
| USP35    | 0.006783301  | 0.877952 | 0.904656 |
| USP36    | -0.159741223 | 0.000273 | 0.000643 |
| USP37    | 0.104462696  | 0.017722 | 0.029856 |
| USP38    | 0.116554445  | 0.008105 | 0.014647 |
| USP39    | 0.245302988  | 1.70E-08 | 7.87E-08 |
| USP3     | 0.193616661  | 9.64E-06 | 2.89E-05 |
| USP40    | -0.153952994 | 0.000455 | 0.001027 |
| USP42    | 0.086204871  | 0.050561 | 0.077316 |
| USP43    | -0.043659467 | 0.322734 | 0.395774 |
| USP44    | -0.332716605 | 8.89E-15 | 1.06E-13 |
| USP45    | 0.035456401  | 0.422015 | 0.49657  |



|        |              |          |          |
|--------|--------------|----------|----------|
| USP46  | 0.041037467  | 0.352673 | 0.427278 |
| USP47  | -0.113835142 | 0.009725 | 0.017315 |
| USP48  | -0.230995463 | 1.15E-07 | 4.69E-07 |
| USP49  | -0.155720243 | 0.00039  | 0.00089  |
| USP4   | -0.306011681 | 1.26E-12 | 1.09E-11 |
| USP50  | 0.035237598  | 0.424886 | 0.499507 |
| USP51  | -0.24822827  | 1.14E-08 | 5.38E-08 |
| USP53  | -0.231832688 | 1.03E-07 | 4.24E-07 |
| USP54  | -0.339237207 | 2.46E-15 | 3.21E-14 |
| USP5   | 0.247861621  | 1.20E-08 | 5.65E-08 |
| USP6NL | 0.007835928  | 0.859197 | 0.889273 |
| USP6   | -0.169705884 | 0.000109 | 0.000276 |
| USP7   | -0.00666338  | 0.880094 | 0.906113 |
| USP8   | -0.051668831 | 0.241806 | 0.309029 |
| USP9X  | 0.00754753   | 0.864328 | 0.893473 |
| USP9Y  | 0.132474455  | 0.002593 | 0.005121 |
| USPL1  | -0.096842959 | 0.027982 | 0.045229 |
| UST    | -0.247209255 | 1.31E-08 | 6.15E-08 |
| UTF1   | -0.137519091 | 0.001759 | 0.003579 |
| UTP11L | 0.281528707  | 7.75E-11 | 5.07E-10 |
| UTP14A | 0.281707954  | 7.53E-11 | 4.93E-10 |
| UTP14C | -0.015854878 | 0.71963  | 0.772087 |
| UTP15  | 0.242970653  | 2.35E-08 | 1.06E-07 |
| UTP18  | 0.325658326  | 3.46E-14 | 3.77E-13 |
| UTP20  | 0.252498766  | 6.22E-09 | 3.06E-08 |
| UTP23  | 0.264365011  | 1.10E-09 | 6.10E-09 |
| UTP3   | -0.009992831 | 0.821024 | 0.857306 |
| UTP6   | 0.309112826  | 7.27E-13 | 6.51E-12 |
| UTRN   | -0.371673939 | 2.57E-18 | 5.23E-17 |
| UTS2D  | -0.110186965 | 0.012346 | 0.021481 |
| UTS2R  | 0.003118786  | 0.943712 | 0.955327 |
| UTS2   | -0.062599422 | 0.156031 | 0.211026 |
| UTY    | 0.128711723  | 0.003433 | 0.006632 |
| UVRAG  | -0.149068614 | 0.00069  | 0.001511 |
| UXS1   | -0.145206723 | 0.00095  | 0.002028 |
| UXT    | 0.204434482  | 2.90E-06 | 9.44E-06 |
| VAC14  | -0.039773671 | 0.36771  | 0.442385 |
| VAMP1  | -0.284353272 | 4.91E-11 | 3.30E-10 |
| VAMP2  | -0.420612387 | 1.70E-23 | 7.50E-22 |
| VAMP3  | -0.117496931 | 0.007603 | 0.013806 |
| VAMP4  | -0.058561094 | 0.184551 | 0.244308 |
| VAMP5  | 0.022402153  | 0.612005 | 0.676104 |
| VAMP7  | 0.085664097  | 0.052031 | 0.079298 |
| VAMP8  | -0.158018226 | 0.000318 | 0.000739 |

|         |              |          |          |
|---------|--------------|----------|----------|
| VANGL1  | 0.204826371  | 2.78E-06 | 9.05E-06 |
| VANGL2  | -0.177374811 | 5.17E-05 | 0.000138 |
| VAPA    | 0.101373403  | 0.021399 | 0.035458 |
| VAPB    | 0.274262895  | 2.44E-10 | 1.48E-09 |
| VARS2   | -0.05743528  | 0.193149 | 0.254224 |
| VARS    | 0.257459726  | 3.05E-09 | 1.56E-08 |
| VASH1   | -0.280090023 | 9.75E-11 | 6.29E-10 |
| VASH2   | 0.06869699   | 0.119462 | 0.166561 |
| VASN    | -0.162395189 | 0.000215 | 0.000517 |
| VASP    | 0.144561134  | 0.001002 | 0.002132 |
| VAT1L   | 0.04719718   | 0.285039 | 0.355952 |
| VAT1    | 0.040319638  | 0.361166 | 0.435902 |
| VAV1    | -0.250157552 | 8.67E-09 | 4.19E-08 |
| VAV2    | -8.47E-05    | 0.998471 | 0.99912  |
| VAV3    | -0.131141751 | 0.002866 | 0.005613 |
| VAX1    | 0.186539467  | 2.04E-05 | 5.82E-05 |
| VAX2    | 0.096227786  | 0.028998 | 0.046693 |
| VBP1    | 0.3440099    | 9.41E-16 | 1.30E-14 |
| VCAM1   | -0.000378483 | 0.993164 | 0.994906 |
| VCAN    | 0.184696486  | 2.47E-05 | 6.94E-05 |
| VCL     | 0.045144134  | 0.306537 | 0.378284 |
| VCPIP1  | 0.22339338   | 3.02E-07 | 1.15E-06 |
| VCP     | 0.228638854  | 1.56E-07 | 6.21E-07 |
| VCX2    | 0.070541731  | 0.109832 | 0.154546 |
| VCX3A   | 0.07689858   | 0.081255 | 0.118239 |
| VCX3B   | 0.062661007  | 0.155624 | 0.210518 |
| VCX     | 0.090112903  | 0.040936 | 0.063824 |
| VCY     | 0.070552763  | 0.109776 | 0.154489 |
| VDAC1   | 0.434032337  | 4.51E-25 | 2.56E-23 |
| VDAC2   | 0.466652369  | 3.28E-29 | 3.17E-27 |
| VDAC3   | 0.328507461  | 2.01E-14 | 2.26E-13 |
| VDR     | -0.194926431 | 8.36E-06 | 2.53E-05 |
| VEGFA   | 0.082650013  | 0.060892 | 0.091389 |
| VEGFB   | -0.137046321 | 0.001826 | 0.003704 |
| VEGFC   | 0.261237287  | 1.76E-09 | 9.36E-09 |
| VENTXP1 | 0.044200388  | 0.31677  | 0.389157 |
| VENTXP7 | 0.189411767  | 1.51E-05 | 4.40E-05 |
| VENTX   | -0.308687037 | 7.84E-13 | 6.99E-12 |
| VEPH1   | -0.323407529 | 5.29E-14 | 5.57E-13 |
| VEZF1   | -0.103591105 | 0.018699 | 0.031356 |
| VEZT    | 0.167688445  | 0.000132 | 0.000329 |
| VGf     | 0.195534671  | 7.83E-06 | 2.38E-05 |
| VGLL1   | -0.186834264 | 1.98E-05 | 5.66E-05 |
| VGLL2   | 0.064695701  | 0.142608 | 0.195063 |

|          |              |          |          |
|----------|--------------|----------|----------|
| VGLL3    | -0.024968246 | 0.571849 | 0.639948 |
| VGLL4    | -0.099390341 | 0.024094 | 0.039451 |
| VHLL     | -0.048859687 | 0.268394 | 0.33808  |
| VHL      | 0.006081946  | 0.890488 | 0.91432  |
| VIL1     | 0.193859314  | 9.39E-06 | 2.82E-05 |
| VILL     | -0.231212351 | 1.12E-07 | 4.57E-07 |
| VIM      | -0.191380323 | 1.23E-05 | 3.62E-05 |
| VIPAR    | 0.112512487  | 0.010612 | 0.018736 |
| VIPR1    | -0.483591331 | 1.53E-31 | 2.23E-29 |
| VIPR2    | -0.022730669 | 0.606795 | 0.671461 |
| VIP      | -0.264778533 | 1.04E-09 | 5.76E-09 |
| VIT      | -0.149413724 | 0.00067  | 0.001471 |
| VKORC1L1 | 0.05659413   | 0.199761 | 0.261756 |
| VKORC1   | -0.0005211   | 0.990588 | 0.993072 |
| VLDLR    | -0.028304687 | 0.521586 | 0.593569 |
| VMA21    | 0.165742523  | 0.000158 | 0.000389 |
| VMAC     | -0.379585025 | 4.28E-19 | 9.85E-18 |
| VMO1     | -0.082556381 | 0.061186 | 0.091802 |
| VN1R1    | -0.233350158 | 8.47E-08 | 3.53E-07 |
| VN1R2    | -0.01260107  | 0.775429 | 0.819331 |
| VN1R4    | -0.075978664 | 0.084973 | 0.123005 |
| VN1R5    | -0.164112063 | 0.000184 | 0.000447 |
| VNN1     | 0.021018481  | 0.634161 | 0.695659 |
| VNN2     | -0.134660293 | 0.002195 | 0.004398 |
| VNN3     | -0.05585977  | 0.205668 | 0.26858  |
| VOPP1    | 0.112433191  | 0.010667 | 0.018822 |
| VPRBP    | -0.029993811 | 0.497032 | 0.570126 |
| VPREB1   | -0.00899886  | 0.838569 | 0.871714 |
| VPREB3   | -0.08236714  | 0.061784 | 0.092581 |
| VPS11    | -0.259811264 | 2.17E-09 | 1.14E-08 |
| VPS13A   | -0.253518545 | 5.38E-09 | 2.68E-08 |
| VPS13B   | -0.128796345 | 0.003412 | 0.006595 |
| VPS13C   | -0.347081569 | 5.02E-16 | 7.29E-15 |
| VPS13D   | -0.372491114 | 2.14E-18 | 4.40E-17 |
| VPS16    | -0.142901038 | 0.001147 | 0.002414 |
| VPS18    | 0.039450591  | 0.371617 | 0.446521 |
| VPS24    | -0.029537902 | 0.503598 | 0.576264 |
| VPS25    | 0.225844032  | 2.22E-07 | 8.65E-07 |
| VPS26A   | 0.316514627  | 1.90E-13 | 1.85E-12 |
| VPS26B   | -0.189975738 | 1.42E-05 | 4.17E-05 |
| VPS28    | -0.038010739 | 0.389339 | 0.464161 |
| VPS29    | 0.303680538  | 1.90E-12 | 1.59E-11 |
| VPS33A   | 0.365820969  | 9.42E-18 | 1.77E-16 |
| VPS33B   | 0.089479333  | 0.042382 | 0.065807 |

|         |              |          |          |
|---------|--------------|----------|----------|
| VPS35   | 0.191485392  | 1.21E-05 | 3.58E-05 |
| VPS36   | -0.07259546  | 0.099842 | 0.142048 |
| VPS37A  | 0.192377649  | 1.10E-05 | 3.27E-05 |
| VPS37B  | -0.047543729 | 0.281513 | 0.352165 |
| VPS37C  | 0.050896482  | 0.248924 | 0.31683  |
| VPS37D  | 0.067687511  | 0.125005 | 0.173285 |
| VPS39   | -0.277372146 | 1.50E-10 | 9.41E-10 |
| VPS41   | -0.086750517 | 0.049113 | 0.075253 |
| VPS45   | 0.04844929   | 0.272439 | 0.342464 |
| VPS4A   | -0.047549018 | 0.28146  | 0.35212  |
| VPS4B   | 0.09547803   | 0.030279 | 0.04857  |
| VPS52   | -0.045229783 | 0.305619 | 0.377361 |
| VPS53   | -0.196862782 | 6.77E-06 | 2.08E-05 |
| VPS54   | 0.087962083  | 0.046022 | 0.070951 |
| VPS72   | 0.243813403  | 2.09E-08 | 9.53E-08 |
| VPS8    | -0.20043991  | 4.56E-06 | 1.44E-05 |
| VRK1    | 0.426253498  | 3.77E-24 | 1.87E-22 |
| VRK2    | 0.339699771  | 2.24E-15 | 2.95E-14 |
| VRK3    | -0.120521974 | 0.006173 | 0.011396 |
| VSIG10L | 0.06324452   | 0.151802 | 0.205934 |
| VSIG10  | -0.056063165 | 0.204019 | 0.266648 |
| VSIG1   | -0.070613598 | 0.109469 | 0.154122 |
| VSIG2   | -0.343391493 | 1.07E-15 | 1.47E-14 |
| VSIG4   | -0.071635826 | 0.104416 | 0.147665 |
| VSIG8   | -0.183239174 | 2.87E-05 | 7.97E-05 |
| VSNL1   | -0.011105281 | 0.801494 | 0.840875 |
| VSTM1   | -0.085390293 | 0.052789 | 0.080325 |
| VSTM2A  | -0.050641951 | 0.251302 | 0.319429 |
| VSTM2B  | -0.021847511 | 0.620845 | 0.684029 |
| VSTM2L  | -0.0307308   | 0.486515 | 0.559939 |
| VSX1    | 0.013583834  | 0.758439 | 0.805242 |
| VSX2    | -0.04568293  | 0.300794 | 0.372346 |
| VTA1    | 0.305961107  | 1.27E-12 | 1.09E-11 |
| VTCN1   | -0.163614478 | 0.000192 | 0.000466 |
| VTI1A   | 0.223799854  | 2.87E-07 | 1.10E-06 |
| VTI1B   | 0.283667231  | 5.49E-11 | 3.66E-10 |
| VTN     | 0.040473206  | 0.359338 | 0.434037 |
| VWA1    | -0.176947026 | 5.40E-05 | 0.000143 |
| VWA2    | -0.347666433 | 4.46E-16 | 6.50E-15 |
| VWA3A   | -0.35121968  | 2.14E-16 | 3.23E-15 |
| VWA3B   | -0.192268379 | 1.11E-05 | 3.31E-05 |
| VWA5A   | -0.280489759 | 9.15E-11 | 5.93E-10 |
| VWA5B1  | -0.263684352 | 1.22E-09 | 6.69E-09 |
| VWA5B2  | -0.083934986 | 0.056973 | 0.08601  |

|         |              |          |          |
|---------|--------------|----------|----------|
| VWC2L   | -0.021247651 | 0.630468 | 0.692357 |
| VWC2    | -0.254903922 | 4.42E-09 | 2.22E-08 |
| VWCE    | -0.224443429 | 2.65E-07 | 1.02E-06 |
| VWDE    | 0.065385392  | 0.138391 | 0.189905 |
| VWF     | -0.312993729 | 3.62E-13 | 3.39E-12 |
| WAC     | 0.125616735  | 0.004302 | 0.008171 |
| WAPAL   | 0.143212142  | 0.001118 | 0.002359 |
| WARS2   | 0.120588919  | 0.006145 | 0.011347 |
| WARS    | 0.146249745  | 0.000872 | 0.001874 |
| WASF1   | 0.215007154  | 8.43E-07 | 2.99E-06 |
| WASF2   | -0.101385343 | 0.021384 | 0.035438 |
| WASF3   | -0.227114082 | 1.89E-07 | 7.45E-07 |
| WASH2P  | -0.299000639 | 4.27E-12 | 3.36E-11 |
| WASH3P  | -0.259258702 | 2.35E-09 | 1.23E-08 |
| WASH5P  | -0.213645132 | 9.92E-07 | 3.49E-06 |
| WASH7P  | -0.29719494  | 5.81E-12 | 4.50E-11 |
| WASL    | 0.138281878  | 0.001657 | 0.003388 |
| WAS     | -0.257651312 | 2.97E-09 | 1.52E-08 |
| WBP11P1 | 0.25888506   | 2.48E-09 | 1.29E-08 |
| WBP11   | 0.309468005  | 6.82E-13 | 6.13E-12 |
| WBP1    | -0.119825825 | 0.006479 | 0.011913 |
| WBP2NL  | -0.23843552  | 4.33E-08 | 1.88E-07 |
| WBP2    | -0.303284365 | 2.03E-12 | 1.69E-11 |
| WBP4    | 0.009336739  | 0.832595 | 0.866857 |
| WBP5    | 0.044655894  | 0.311803 | 0.383764 |
| WBSCR16 | 0.124034722  | 0.00482  | 0.009085 |
| WBSCR17 | -0.365390696 | 1.03E-17 | 1.93E-16 |
| WBSCR22 | 0.164518959  | 0.000177 | 0.000432 |
| WBSCR26 | -0.186999507 | 1.94E-05 | 5.57E-05 |
| WBSCR27 | -0.042820366 | 0.33213  | 0.405783 |
| WBSCR28 | -0.009928831 | 0.822151 | 0.858263 |
| WDFY1   | 0.035589361  | 0.420275 | 0.494931 |
| WDFY2   | -0.196390849 | 7.13E-06 | 2.18E-05 |
| WDFY3   | -0.256093073 | 3.72E-09 | 1.89E-08 |
| WDFY4   | -0.202218193 | 3.73E-06 | 1.19E-05 |
| WDHD1   | 0.461910341  | 1.40E-28 | 1.25E-26 |
| WDR11   | -0.084019167 | 0.056723 | 0.085698 |
| WDR12   | 0.490257271  | 1.70E-32 | 2.96E-30 |
| WDR13   | -0.167618293 | 0.000133 | 0.00033  |
| WDR16   | -0.209754972 | 1.57E-06 | 5.33E-06 |
| WDR17   | -0.187868681 | 1.78E-05 | 5.12E-05 |
| WDR18   | 0.121002241  | 0.00597  | 0.011053 |
| WDR19   | -0.317364514 | 1.63E-13 | 1.60E-12 |
| WDR1    | 0.118108438  | 0.007292 | 0.013292 |

|        |              |          |          |
|--------|--------------|----------|----------|
| WDR20  | 0.105639117  | 0.016475 | 0.027935 |
| WDR24  | -0.192453558 | 1.09E-05 | 3.25E-05 |
| WDR25  | 0.019996592  | 0.650738 | 0.710646 |
| WDR26  | -0.044810542 | 0.310129 | 0.38215  |
| WDR27  | -0.300514272 | 3.29E-12 | 2.64E-11 |
| WDR31  | -0.086320614 | 0.050251 | 0.076902 |
| WDR33  | -0.185089121 | 2.37E-05 | 6.68E-05 |
| WDR34  | 0.072138401  | 0.102    | 0.144697 |
| WDR35  | -0.135676305 | 0.00203  | 0.004092 |
| WDR36  | 0.140769779  | 0.001361 | 0.002826 |
| WDR37  | -0.30719098  | 1.02E-12 | 8.95E-12 |
| WDR38  | -0.190431748 | 1.36E-05 | 3.98E-05 |
| WDR3   | 0.303737781  | 1.88E-12 | 1.57E-11 |
| WDR41  | -0.000911615 | 0.983535 | 0.987775 |
| WDR43  | 0.514130086  | 4.34E-36 | 1.52E-33 |
| WDR44  | 0.074471164  | 0.091362 | 0.131207 |
| WDR45L | 0.177160073  | 5.28E-05 | 0.00014  |
| WDR45  | -0.052368623 | 0.23548  | 0.302065 |
| WDR46  | 0.062929399  | 0.153857 | 0.208403 |
| WDR47  | -0.172906636 | 8.01E-05 | 0.000207 |
| WDR48  | -0.130715444 | 0.002959 | 0.005786 |
| WDR49  | -0.241587935 | 2.83E-08 | 1.26E-07 |
| WDR4   | 0.178532143  | 4.61E-05 | 0.000124 |
| WDR52  | -0.365853048 | 9.35E-18 | 1.76E-16 |
| WDR53  | 0.209891661  | 1.55E-06 | 5.26E-06 |
| WDR54  | -0.079671989 | 0.070836 | 0.104632 |
| WDR55  | -0.046500259 | 0.29222  | 0.363488 |
| WDR59  | -0.15066889  | 0.000602 | 0.001333 |
| WDR5B  | -0.218995768 | 5.20E-07 | 1.92E-06 |
| WDR5   | 0.223085241  | 3.14E-07 | 1.20E-06 |
| WDR60  | -0.164454917 | 0.000178 | 0.000434 |
| WDR61  | 0.065807217  | 0.135859 | 0.186815 |
| WDR62  | 0.217090427  | 6.56E-07 | 2.37E-06 |
| WDR63  | -0.261071871 | 1.80E-09 | 9.59E-09 |
| WDR64  | -0.004773399 | 0.913946 | 0.932752 |
| WDR65  | -0.291118545 | 1.62E-11 | 1.17E-10 |
| WDR66  | 0.042284506  | 0.338222 | 0.412293 |
| WDR67  | 0.433051862  | 5.91E-25 | 3.29E-23 |
| WDR69  | 0.01589076   | 0.719023 | 0.771642 |
| WDR6   | -0.273195151 | 2.88E-10 | 1.73E-09 |
| WDR70  | 0.074261409  | 0.09228  | 0.132279 |
| WDR72  | 0.135556426  | 0.002049 | 0.004127 |
| WDR73  | -0.001141166 | 0.97939  | 0.98471  |
| WDR74  | 0.24462878   | 1.87E-08 | 8.59E-08 |

|         |              |          |          |
|---------|--------------|----------|----------|
| WDR75   | 0.359310657  | 3.86E-17 | 6.59E-16 |
| WDR76   | 0.3462399    | 5.97E-16 | 8.54E-15 |
| WDR77   | 0.156510108  | 0.000364 | 0.000835 |
| WDR78   | -0.159949422 | 0.000268 | 0.000632 |
| WDR7    | -0.17764843  | 5.04E-05 | 0.000134 |
| WDR81   | -0.28445523  | 4.83E-11 | 3.26E-10 |
| WDR82   | 0.029596865  | 0.502747 | 0.575515 |
| WDR83   | -0.166361686 | 0.000149 | 0.000369 |
| WDR85   | -0.046242184 | 0.294909 | 0.366241 |
| WDR86   | -0.123874599 | 0.004875 | 0.009178 |
| WDR87   | -0.06670377  | 0.130596 | 0.180261 |
| WDR88   | -0.017965269 | 0.6842   | 0.740954 |
| WDR89   | 0.185902906  | 2.18E-05 | 6.19E-05 |
| WDR8    | -0.071934778 | 0.102973 | 0.145964 |
| WDR90   | -0.263845305 | 1.19E-09 | 6.55E-09 |
| WDR91   | -0.389221405 | 4.49E-20 | 1.18E-18 |
| WDR92   | -0.023654397 | 0.592253 | 0.658212 |
| WDR93   | -0.248405479 | 1.11E-08 | 5.26E-08 |
| WDSUB1  | -0.03315696  | 0.452755 | 0.527033 |
| WDTC1   | -0.479239827 | 6.25E-31 | 8.01E-29 |
| WDYHV1  | 0.343727718  | 9.96E-16 | 1.37E-14 |
| WEE1    | -0.030373482 | 0.491599 | 0.564847 |
| WEE2    | -0.126192721 | 0.004127 | 0.007862 |
| WFDC10A | 0.034583525  | 0.433538 | 0.508184 |
| WFDC10B | -0.001859094 | 0.966429 | 0.974326 |
| WFDC11  | -0.030929256 | 0.483703 | 0.557441 |
| WFDC12  | -0.117950328 | 0.007372 | 0.013423 |
| WFDC13  | -0.063920146 | 0.147467 | 0.200775 |
| WFDC1   | -0.189360646 | 1.52E-05 | 4.43E-05 |
| WFDC2   | -0.365756111 | 9.55E-18 | 1.80E-16 |
| WFDC3   | 0.028818637  | 0.514049 | 0.586395 |
| WFDC5   | -0.144691255 | 0.000991 | 0.00211  |
| WFDC6   | -0.230617314 | 1.21E-07 | 4.91E-07 |
| WFDC8   | -0.049538611 | 0.261791 | 0.330743 |
| WFDC9   | -0.014718771 | 0.738962 | 0.788758 |
| WFIKKN1 | -0.206271997 | 2.35E-06 | 7.77E-06 |
| WFIKKN2 | -0.157915311 | 0.000321 | 0.000746 |
| WFS1    | -0.218206196 | 5.73E-07 | 2.09E-06 |
| WHAMML1 | -0.258426463 | 2.65E-09 | 1.37E-08 |
| WHAMML2 | -0.220531556 | 4.31E-07 | 1.61E-06 |
| WHAMM   | -0.324969709 | 3.94E-14 | 4.26E-13 |
| WHSC1L1 | -0.036446674 | 0.409161 | 0.483866 |
| WHSC1   | 0.197225193  | 6.51E-06 | 2.00E-05 |
| WHSC2   | 0.068383981  | 0.12116  | 0.168716 |

|        |              |          |          |
|--------|--------------|----------|----------|
| WIBG   | 0.274172574  | 2.48E-10 | 1.50E-09 |
| WIF1   | -0.256676455 | 3.42E-09 | 1.74E-08 |
| WIPF1  | -0.108399529 | 0.013845 | 0.023865 |
| WIPF2  | -0.025074072 | 0.57022  | 0.638375 |
| WIPF3  | -0.03545308  | 0.422058 | 0.496592 |
| WIPI1  | -0.041903118 | 0.342601 | 0.416615 |
| WIPI2  | 0.052262235  | 0.236434 | 0.303095 |
| WISP1  | 0.124651976  | 0.004612 | 0.008716 |
| WISP2  | -0.107029734 | 0.0151   | 0.02583  |
| WISP3  | 0.066387859  | 0.132432 | 0.182581 |
| WIT1   | 0.134955347  | 0.002146 | 0.004306 |
| WIZ    | -0.0842123   | 0.056155 | 0.084929 |
| WLS    | -0.305414527 | 1.40E-12 | 1.20E-11 |
| WNK1   | -0.154022359 | 0.000452 | 0.001021 |
| WNK2   | -0.003675917 | 0.933679 | 0.948147 |
| WNK3   | 0.022328422  | 0.613177 | 0.677099 |
| WNK4   | -0.02251874  | 0.610153 | 0.674432 |
| WNT10A | -0.247457638 | 1.26E-08 | 5.95E-08 |
| WNT10B | -0.088194086 | 0.045449 | 0.070138 |
| WNT11  | -0.333648729 | 7.41E-15 | 8.94E-14 |
| WNT16  | 0.067988086  | 0.123334 | 0.171361 |
| WNT1   | -0.116001443 | 0.008414 | 0.015144 |
| WNT2B  | -0.373802713 | 1.60E-18 | 3.36E-17 |
| WNT2   | -0.02395123  | 0.587614 | 0.654148 |
| WNT3A  | -0.269871675 | 4.80E-10 | 2.80E-09 |
| WNT3   | -0.009269507 | 0.833783 | 0.867867 |
| WNT4   | -0.194071412 | 9.18E-06 | 2.76E-05 |
| WNT5A  | -0.244130563 | 2.00E-08 | 9.16E-08 |
| WNT5B  | -0.056316175 | 0.201982 | 0.264476 |
| WNT6   | -0.073029672 | 0.097825 | 0.139507 |
| WNT7A  | -0.084523076 | 0.05525  | 0.0837   |
| WNT7B  | -0.158995657 | 0.000292 | 0.000683 |
| WNT8A  | -0.051664395 | 0.241846 | 0.309061 |
| WNT8B  | -0.036742833 | 0.405362 | 0.480113 |
| WNT9A  | -0.01206015  | 0.784828 | 0.827162 |
| WNT9B  | -0.136098595 | 0.001965 | 0.003968 |
| WRAP53 | 0.110217706  | 0.012322 | 0.021444 |
| WRB    | -0.150002783 | 0.000637 | 0.001404 |
| WRNIP1 | 0.225471376  | 2.33E-07 | 9.04E-07 |
| WRN    | 0.096188521  | 0.029064 | 0.046781 |
| WSB1   | -0.200848001 | 4.35E-06 | 1.38E-05 |
| WSB2   | 0.311224538  | 4.98E-13 | 4.55E-12 |
| WSCD1  | -0.10889407  | 0.013415 | 0.023174 |
| WSCD2  | -0.305610178 | 1.35E-12 | 1.16E-11 |



|         |              |          |          |
|---------|--------------|----------|----------|
| WT1     | 0.157716352  | 0.000327 | 0.000758 |
| WTAP    | 0.128742538  | 0.003426 | 0.006619 |
| WTIP    | -0.250596314 | 8.15E-09 | 3.95E-08 |
| WWC1    | -0.306609039 | 1.13E-12 | 9.85E-12 |
| WWC2    | -0.163617001 | 0.000192 | 0.000466 |
| WWC3    | -0.295361673 | 7.94E-12 | 6.04E-11 |
| WWOX    | -0.161112678 | 0.000241 | 0.000574 |
| WWP1    | 0.165436619  | 0.000162 | 0.000399 |
| WWP2    | -0.372973159 | 1.92E-18 | 3.96E-17 |
| WWTR1   | 0.072948096  | 0.098201 | 0.139983 |
| XAB2    | -0.252571177 | 6.16E-09 | 3.03E-08 |
| XAF1    | -0.235739198 | 6.19E-08 | 2.62E-07 |
| XAGE1D  | 0.00458135   | 0.917395 | 0.935196 |
| XAGE2   | -0.047648401 | 0.280454 | 0.351103 |
| XAGE3   | -0.071879292 | 0.10324  | 0.146227 |
| XAGE5   | -0.016766241 | 0.704251 | 0.759336 |
| XBP1    | 0.08994548   | 0.041314 | 0.064364 |
| XCL1    | 0.066276759  | 0.133083 | 0.183389 |
| XCL2    | 0.032146129  | 0.466658 | 0.540509 |
| XCR1    | -0.265504025 | 9.31E-10 | 5.21E-09 |
| XDH     | -0.02026929  | 0.646297 | 0.706684 |
| XG      | 0.070811184  | 0.108478 | 0.152888 |
| XIAP    | -0.032960562 | 0.455438 | 0.529446 |
| XIRP1   | 0.191447087  | 1.22E-05 | 3.60E-05 |
| XIRP2   | 0.054406327  | 0.217729 | 0.282046 |
| XIST    | -0.224295717 | 2.70E-07 | 1.04E-06 |
| XKR3    | 0.007695495  | 0.861695 | 0.891304 |
| XKR4    | -0.207577589 | 2.02E-06 | 6.75E-06 |
| XKR5    | -0.070934523 | 0.107863 | 0.15209  |
| XKR6    | -0.213765149 | 9.78E-07 | 3.44E-06 |
| XKR7    | -0.039144065 | 0.375347 | 0.450165 |
| XKR8    | -0.139086372 | 0.001556 | 0.003195 |
| XKR9    | -0.024012135 | 0.586664 | 0.653139 |
| XKRX    | -0.16763236  | 0.000132 | 0.00033  |
| XKRY2   | 0.09039776   | 0.040299 | 0.062901 |
| XK      | -0.05276178  | 0.231978 | 0.29807  |
| XPA     | -0.235236637 | 6.61E-08 | 2.80E-07 |
| XPC     | -0.385916469 | 9.80E-20 | 2.46E-18 |
| XPNPEP1 | 0.162001218  | 0.000223 | 0.000534 |
| XPNPEP2 | -0.119127331 | 0.0068   | 0.012461 |
| XPNPEP3 | 0.063788228  | 0.148306 | 0.20178  |
| XPO1    | 0.276796034  | 1.64E-10 | 1.02E-09 |
| XPO4    | 0.05811547   | 0.18792  | 0.248294 |
| XPO5    | 0.297095738  | 5.91E-12 | 4.57E-11 |

|          |              |          |          |
|----------|--------------|----------|----------|
| XPO6     | 0.063949579  | 0.147281 | 0.200562 |
| XPO7     | 0.048272513  | 0.274195 | 0.344497 |
| XPOT     | 0.462596174  | 1.13E-28 | 1.03E-26 |
| XPR1     | 0.041944182  | 0.342127 | 0.416293 |
| XRCC1    | -0.108008074 | 0.014194 | 0.024424 |
| XRCC2    | 0.373642423  | 1.65E-18 | 3.46E-17 |
| XRCC3    | 0.155796308  | 0.000387 | 0.000885 |
| XRCC4    | 0.215495185  | 7.95E-07 | 2.83E-06 |
| XRCC5    | 0.314715295  | 2.65E-13 | 2.53E-12 |
| XRCC6BP1 | 0.140933144  | 0.001343 | 0.002791 |
| XRCC6    | 0.212517932  | 1.13E-06 | 3.94E-06 |
| XRN1     | -0.022757802 | 0.606365 | 0.671135 |
| XRN2     | 0.147513619  | 0.000785 | 0.001702 |
| XRRA1    | 0.024107324  | 0.585181 | 0.651831 |
| XYLB     | 0.17127222   | 9.37E-05 | 0.00024  |
| XYLT1    | -0.01186068  | 0.788301 | 0.830079 |
| XYLT2    | -0.256772953 | 3.37E-09 | 1.72E-08 |
| YAF2     | 0.252584191  | 6.15E-09 | 3.03E-08 |
| YAP1     | -0.069510509 | 0.115137 | 0.161295 |
| YARS2    | 0.472270382  | 5.71E-30 | 6.28E-28 |
| YARS     | 0.219676505  | 4.78E-07 | 1.78E-06 |
| YBX1     | 0.275872199  | 1.90E-10 | 1.17E-09 |
| YBX2     | 0.234454881  | 7.33E-08 | 3.08E-07 |
| YDJC     | 0.24676025   | 1.39E-08 | 6.52E-08 |
| YEATS2   | 0.100713236  | 0.022265 | 0.036756 |
| YEATS4   | 0.285990362  | 3.77E-11 | 2.58E-10 |
| YES1     | 0.292586124  | 1.27E-11 | 9.33E-11 |
| YIF1A    | 0.234157038  | 7.62E-08 | 3.19E-07 |
| YIF1B    | 0.16766854   | 0.000132 | 0.000329 |
| YIPF1    | 0.0887176    | 0.044178 | 0.068373 |
| YIPF2    | 0.045993545  | 0.297516 | 0.368768 |
| YIPF3    | -0.057592839 | 0.191928 | 0.252834 |
| YIPF4    | 0.245982447  | 1.55E-08 | 7.21E-08 |
| YIPF5    | 0.161408301  | 0.000235 | 0.000561 |
| YIPF6    | 0.320377943  | 9.32E-14 | 9.48E-13 |
| YIPF7    | -0.056200226 | 0.202914 | 0.265508 |
| YJEFN3   | -0.182919898 | 2.96E-05 | 8.22E-05 |
| YKT6     | 0.334689545  | 6.04E-15 | 7.43E-14 |
| YLPM1    | -0.011120311 | 0.801231 | 0.840727 |
| YME1L1   | 0.359003515  | 4.13E-17 | 7.01E-16 |
| YOD1     | -0.139700844 | 0.001482 | 0.003057 |
| YPEL1    | -0.357858314 | 5.27E-17 | 8.81E-16 |
| YPEL2    | -0.285351469 | 4.18E-11 | 2.84E-10 |
| YPEL3    | -0.351565794 | 1.99E-16 | 3.03E-15 |

|        |              |          |          |
|--------|--------------|----------|----------|
| YPEL4  | -0.122403959 | 0.005411 | 0.010103 |
| YPEL5  | -0.154371252 | 0.000438 | 0.000994 |
| YRDC   | 0.35865869   | 4.44E-17 | 7.49E-16 |
| YSK4   | -0.23619791  | 5.82E-08 | 2.48E-07 |
| YTHDC1 | -0.12050115  | 0.006182 | 0.011409 |
| YTHDC2 | -0.293177382 | 1.15E-11 | 8.49E-11 |
| YTHDF1 | 0.09225986   | 0.036341 | 0.057267 |
| YTHDF2 | -0.012839724 | 0.771293 | 0.816023 |
| YTHDF3 | 0.31298334   | 3.62E-13 | 3.39E-12 |
| YWHAB  | 0.226862484  | 1.95E-07 | 7.68E-07 |
| YWHAE  | 0.290118489  | 1.91E-11 | 1.37E-10 |
| YWHAG  | 0.431132696  | 1.00E-24 | 5.32E-23 |
| YWHAH  | 0.050229193  | 0.255191 | 0.323673 |
| YWHAQ  | 0.380021736  | 3.87E-19 | 8.97E-18 |
| YWHAZ  | 0.492963963  | 6.88E-33 | 1.24E-30 |
| YY1AP1 | -0.117197625 | 0.00776  | 0.014064 |
| YY1    | 0.3842561    | 1.45E-19 | 3.59E-18 |
| YY2    | -0.043303383 | 0.3267   | 0.39998  |
| ZACN   | -0.013118372 | 0.766472 | 0.812099 |
| ZADH2  | -0.016703156 | 0.705312 | 0.760233 |
| ZAK    | 0.15421206   | 0.000444 | 0.001007 |
| ZAN    | 0.021766603  | 0.622139 | 0.685179 |
| ZAP70  | -0.268354478 | 6.05E-10 | 3.48E-09 |
| ZAR1L  | 0.022230032  | 0.614742 | 0.678453 |
| ZAR1   | -0.051538731 | 0.242995 | 0.310311 |
| ZBBX   | -0.199807687 | 4.89E-06 | 1.53E-05 |
| ZBED1  | 0.098087955  | 0.026019 | 0.042333 |
| ZBED2  | -0.049215107 | 0.264923 | 0.334235 |
| ZBED3  | -0.179834273 | 4.05E-05 | 0.00011  |
| ZBED4  | 0.081942085  | 0.063145 | 0.094394 |
| ZBED5  | -0.28578578  | 3.89E-11 | 2.66E-10 |
| ZBP1   | -0.112546283 | 0.010588 | 0.018698 |
| ZBTB10 | 0.201763346  | 3.93E-06 | 1.25E-05 |
| ZBTB11 | -0.028819501 | 0.514037 | 0.586395 |
| ZBTB12 | 0.054445162  | 0.2174   | 0.281711 |
| ZBTB16 | -0.294152327 | 9.73E-12 | 7.31E-11 |
| ZBTB17 | -0.177044175 | 5.35E-05 | 0.000142 |
| ZBTB1  | 0.020873959  | 0.636494 | 0.697759 |
| ZBTB20 | -0.148083537 | 0.000749 | 0.001631 |
| ZBTB22 | -0.288505011 | 2.49E-11 | 1.75E-10 |
| ZBTB24 | -0.139383881 | 0.00152  | 0.00313  |
| ZBTB25 | 0.019081697  | 0.665727 | 0.724245 |
| ZBTB26 | -0.024157706 | 0.584397 | 0.651111 |
| ZBTB2  | 0.237153065  | 5.13E-08 | 2.20E-07 |

|          |              |          |          |
|----------|--------------|----------|----------|
| ZBTB32   | -0.16509325  | 0.000168 | 0.000411 |
| ZBTB33   | 0.022159607  | 0.615864 | 0.679479 |
| ZBTB34   | -0.279689628 | 1.04E-10 | 6.68E-10 |
| ZBTB37   | -0.074177851 | 0.092648 | 0.13274  |
| ZBTB38   | 0.137952524  | 0.001701 | 0.003472 |
| ZBTB39   | 0.046123439  | 0.296152 | 0.367488 |
| ZBTB3    | -0.271182852 | 3.93E-10 | 2.32E-09 |
| ZBTB40   | -0.313017747 | 3.60E-13 | 3.37E-12 |
| ZBTB41   | 0.179135443  | 4.34E-05 | 0.000117 |
| ZBTB42   | -0.059418237 | 0.178197 | 0.237216 |
| ZBTB43   | -0.341316746 | 1.62E-15 | 2.18E-14 |
| ZBTB44   | -0.100569891 | 0.022458 | 0.03703  |
| ZBTB45   | -0.08251141  | 0.061328 | 0.09198  |
| ZBTB46   | -0.369285411 | 4.38E-18 | 8.67E-17 |
| ZBTB47   | -0.348614811 | 3.67E-16 | 5.41E-15 |
| ZBTB48   | -0.3563224   | 7.31E-17 | 1.19E-15 |
| ZBTB49   | -0.237462341 | 4.93E-08 | 2.12E-07 |
| ZBTB4    | -0.43071297  | 1.12E-24 | 5.89E-23 |
| ZBTB5    | -0.050845874 | 0.249396 | 0.317329 |
| ZBTB6    | 0.115329426  | 0.008803 | 0.015776 |
| ZBTB7A   | -0.164492985 | 0.000177 | 0.000433 |
| ZBTB7B   | -0.092705611 | 0.035444 | 0.055981 |
| ZBTB7C   | -0.355359289 | 8.96E-17 | 1.43E-15 |
| ZBTB8A   | -0.073668973 | 0.094915 | 0.135688 |
| ZBTB8B   | 0.031722152  | 0.472559 | 0.546331 |
| ZBTB8OS  | 0.069401454  | 0.11571  | 0.161972 |
| ZBTB9    | 0.137080756  | 0.001821 | 0.003695 |
| ZC3H10   | -0.007488042 | 0.865388 | 0.894383 |
| ZC3H11A  | -0.148724575 | 0.00071  | 0.001552 |
| ZC3H12A  | -0.082089388 | 0.062671 | 0.093748 |
| ZC3H12B  | -0.263557088 | 1.25E-09 | 6.80E-09 |
| ZC3H12C  | -0.065228227 | 0.139343 | 0.191041 |
| ZC3H12D  | -0.260710725 | 1.90E-09 | 1.01E-08 |
| ZC3H13   | -0.05646234  | 0.200812 | 0.26303  |
| ZC3H14   | 0.051445695  | 0.243848 | 0.3113   |
| ZC3H15   | 0.501905448  | 3.26E-34 | 8.14E-32 |
| ZC3H18   | -0.010276558 | 0.816032 | 0.853314 |
| ZC3H3    | 0.075754074  | 0.085902 | 0.124195 |
| ZC3H4    | -0.207374584 | 2.07E-06 | 6.90E-06 |
| ZC3H6    | -0.338518886 | 2.84E-15 | 3.68E-14 |
| ZC3H7A   | -0.207655113 | 2.01E-06 | 6.70E-06 |
| ZC3H7B   | -0.297686206 | 5.34E-12 | 4.16E-11 |
| ZC3H8    | 0.335443137  | 5.21E-15 | 6.46E-14 |
| ZC3HAV1L | 0.177492221  | 5.11E-05 | 0.000136 |

|         |              |          |          |
|---------|--------------|----------|----------|
| ZC3HAV1 | 0.048813044  | 0.268851 | 0.338507 |
| ZC3HC1  | 0.309681833  | 6.57E-13 | 5.92E-12 |
| ZC4H2   | -0.072663935 | 0.099521 | 0.141683 |
| ZCCHC10 | 0.043482083  | 0.324706 | 0.397783 |
| ZCCHC11 | -0.155428801 | 0.0004   | 0.000911 |
| ZCCHC12 | -0.024868984 | 0.573379 | 0.641373 |
| ZCCHC13 | -0.034478287 | 0.434939 | 0.509558 |
| ZCCHC14 | -0.21054432  | 1.43E-06 | 4.90E-06 |
| ZCCHC16 | -0.09926653  | 0.024271 | 0.039723 |
| ZCCHC17 | 0.093379937  | 0.034123 | 0.054067 |
| ZCCHC18 | -0.257636608 | 2.98E-09 | 1.53E-08 |
| ZCCHC24 | -0.295631453 | 7.58E-12 | 5.79E-11 |
| ZCCHC2  | -0.030793806 | 0.485621 | 0.559136 |
| ZCCHC3  | -0.086965532 | 0.048552 | 0.074473 |
| ZCCHC4  | 0.130835062  | 0.002933 | 0.005737 |
| ZCCHC5  | -0.052277999 | 0.236293 | 0.302953 |
| ZCCHC6  | -0.046252354 | 0.294803 | 0.366154 |
| ZCCHC7  | 0.282138801  | 7.03E-11 | 4.62E-10 |
| ZCCHC8  | 0.181843382  | 3.31E-05 | 9.09E-05 |
| ZCCHC9  | 0.180399792  | 3.82E-05 | 0.000104 |
| ZCRB1   | 0.226081518  | 2.16E-07 | 8.41E-07 |
| ZCWPW1  | -0.317401904 | 1.62E-13 | 1.59E-12 |
| ZCWPW2  | -0.291832267 | 1.44E-11 | 1.05E-10 |
| ZDBF2   | 0.029952976  | 0.497618 | 0.570648 |
| ZDHHC11 | -0.319536919 | 1.09E-13 | 1.10E-12 |
| ZDHHC12 | 0.046310462  | 0.294196 | 0.365532 |
| ZDHHC13 | -0.040520139 | 0.358781 | 0.43339  |
| ZDHHC14 | -0.115713059 | 0.008579 | 0.015402 |
| ZDHHC15 | -0.431239162 | 9.73E-25 | 5.20E-23 |
| ZDHHC16 | -0.067150623 | 0.128033 | 0.177061 |
| ZDHHC17 | -0.106163281 | 0.015944 | 0.027107 |
| ZDHHC18 | 0.083298887  | 0.058886 | 0.088631 |
| ZDHHC19 | -0.119719682 | 0.006527 | 0.011997 |
| ZDHHC1  | -0.380773787 | 3.25E-19 | 7.62E-18 |
| ZDHHC20 | 0.137133742  | 0.001813 | 0.003682 |
| ZDHHC21 | -0.077994379 | 0.076999 | 0.112769 |
| ZDHHC22 | 0.01143601   | 0.795711 | 0.836383 |
| ZDHHC23 | -0.061604698 | 0.162726 | 0.21891  |
| ZDHHC24 | 0.022760673  | 0.60632  | 0.671122 |
| ZDHHC2  | -0.141050262 | 0.001331 | 0.002767 |
| ZDHHC3  | -0.168567752 | 0.000121 | 0.000304 |
| ZDHHC4  | 0.059138045  | 0.180256 | 0.239494 |
| ZDHHC5  | 0.048982687  | 0.267189 | 0.336775 |
| ZDHHC6  | 0.210781268  | 1.39E-06 | 4.77E-06 |

|            |              |          |          |
|------------|--------------|----------|----------|
| ZDHHC7     | -0.295550716 | 7.69E-12 | 5.87E-11 |
| ZDHHC8P1   | -0.337486725 | 3.48E-15 | 4.45E-14 |
| ZDHHC8     | -0.237803336 | 4.71E-08 | 2.03E-07 |
| ZDHHC9     | -0.068965751 | 0.11802  | 0.164744 |
| ZEB1       | -0.183424858 | 2.81E-05 | 7.83E-05 |
| ZEB2       | -0.22168193  | 3.74E-07 | 1.40E-06 |
| ZER1       | -0.351597921 | 1.97E-16 | 3.01E-15 |
| ZFAND1     | 0.314463018  | 2.77E-13 | 2.63E-12 |
| ZFAND2A    | 0.271586078  | 3.69E-10 | 2.19E-09 |
| ZFAND2B    | -0.24357752  | 2.16E-08 | 9.82E-08 |
| ZFAND3     | -0.051848682 | 0.240169 | 0.307192 |
| ZFAND5     | -0.128566677 | 0.00347  | 0.006699 |
| ZFAND6     | 0.05667299   | 0.199134 | 0.260969 |
| ZFATAS     | 0.083229417  | 0.059098 | 0.0889   |
| ZFAT       | 0.068069261  | 0.122886 | 0.170845 |
| ZFC3H1     | -0.095749914 | 0.029809 | 0.047899 |
| ZFHX3      | -0.168989194 | 0.000116 | 0.000293 |
| ZFHX4      | 0.017841398  | 0.686261 | 0.742864 |
| ZFP106     | -0.20528126  | 2.64E-06 | 8.63E-06 |
| ZFP112     | -0.138997084 | 0.001567 | 0.003215 |
| ZFP14      | -0.246301872 | 1.48E-08 | 6.92E-08 |
| ZFP161     | -0.133262491 | 0.002442 | 0.004848 |
| ZFP1       | 0.079736082  | 0.070609 | 0.104312 |
| ZFP28      | -0.153915698 | 0.000456 | 0.00103  |
| ZFP2       | -0.37379401  | 1.60E-18 | 3.37E-17 |
| ZFP30      | 0.041032647  | 0.35273  | 0.42732  |
| ZFP36L1    | -0.245264535 | 1.71E-08 | 7.91E-08 |
| ZFP36L2    | -0.19146002  | 1.21E-05 | 3.59E-05 |
| ZFP36      | -0.27699676  | 1.59E-10 | 9.93E-10 |
| ZFP37      | -0.067855928 | 0.124066 | 0.172187 |
| ZFP3       | -0.400747122 | 2.74E-21 | 8.74E-20 |
| ZFP41      | -0.047909915 | 0.27782  | 0.348373 |
| ZFP42      | 0.12816034   | 0.003575 | 0.006881 |
| ZFP57      | 0.011134481  | 0.800983 | 0.840643 |
| ZFP62      | -0.1705598   | 0.0001   | 0.000255 |
| ZFP64      | 0.263285603  | 1.30E-09 | 7.06E-09 |
| ZFP82      | -0.030000834 | 0.496931 | 0.570089 |
| ZFP90      | -0.258505576 | 2.62E-09 | 1.36E-08 |
| ZFP91-CNTF | 0.087600288  | 0.046927 | 0.072186 |
| ZFP91      | 0.12670706   | 0.003976 | 0.007597 |
| ZFP92      | -0.232106532 | 9.96E-08 | 4.10E-07 |
| ZFPL1      | 0.106762296  | 0.015356 | 0.02621  |
| ZFPM1      | -0.234886933 | 6.92E-08 | 2.92E-07 |
| ZFPM2      | -0.152219383 | 0.000528 | 0.001179 |

|          |              |          |          |
|----------|--------------|----------|----------|
| ZFR2     | -0.135003871 | 0.002138 | 0.004293 |
| ZFR      | 0.188356094  | 1.69E-05 | 4.88E-05 |
| ZFX      | -0.114251465 | 0.00946  | 0.01687  |
| ZFYVE16  | -0.180709975 | 3.71E-05 | 0.000101 |
| ZFYVE19  | -0.025722451 | 0.560288 | 0.62962  |
| ZFYVE1   | -0.149634148 | 0.000658 | 0.001446 |
| ZFYVE20  | -0.353435827 | 1.34E-16 | 2.09E-15 |
| ZFYVE21  | -0.065278486 | 0.139038 | 0.190688 |
| ZFYVE26  | -0.196939452 | 6.71E-06 | 2.06E-05 |
| ZFYVE27  | -0.182287926 | 3.16E-05 | 8.72E-05 |
| ZFYVE28  | -0.241644207 | 2.81E-08 | 1.25E-07 |
| ZFYVE9   | -0.056395098 | 0.20135  | 0.263699 |
| ZFY      | 0.162136186  | 0.00022  | 0.000528 |
| ZG16B    | 0.012919586  | 0.769911 | 0.814964 |
| ZG16     | 0.161262114  | 0.000238 | 0.000567 |
| ZGLP1    | -0.302779192 | 2.22E-12 | 1.83E-11 |
| ZGPAT    | -0.143984216 | 0.00105  | 0.002225 |
| ZHX1     | 0.096402269  | 0.028706 | 0.046284 |
| ZHX2     | -0.133790898 | 0.002346 | 0.004671 |
| ZHX3     | -0.131612139 | 0.002767 | 0.005435 |
| ZIC1     | 0.029402732  | 0.505554 | 0.578354 |
| ZIC2     | 0.037013228  | 0.401913 | 0.476564 |
| ZIC3     | 0.063378877  | 0.150933 | 0.204976 |
| ZIC4     | 0.062485298  | 0.156789 | 0.211893 |
| ZIC5     | 0.042641166  | 0.334159 | 0.407938 |
| ZIK1     | -0.139957029 | 0.001452 | 0.002999 |
| ZIM2     | -0.070241425 | 0.111357 | 0.156482 |
| ZIM3     | 0.003293597  | 0.940563 | 0.953201 |
| ZKSCAN1  | 0.059236041  | 0.179534 | 0.238694 |
| ZKSCAN2  | -0.079719687 | 0.070667 | 0.10439  |
| ZKSCAN3  | -0.013696389 | 0.7565   | 0.803578 |
| ZKSCAN4  | -0.032106771 | 0.467204 | 0.540985 |
| ZKSCAN5  | 0.139549674  | 0.0015   | 0.003091 |
| ZMAT1    | -0.47437394  | 2.95E-30 | 3.44E-28 |
| ZMAT2    | -0.03583537  | 0.417068 | 0.491849 |
| ZMAT3    | -0.100615046 | 0.022397 | 0.036943 |
| ZMAT4    | 0.168290389  | 0.000124 | 0.000312 |
| ZMAT5    | -0.112116588 | 0.010891 | 0.019186 |
| ZMIZ1    | -0.254686858 | 4.55E-09 | 2.28E-08 |
| ZMIZ2    | -0.100455906 | 0.022611 | 0.03725  |
| ZMPSTE24 | 0.219321975  | 5.00E-07 | 1.85E-06 |
| ZMYM1    | 0.010709883  | 0.808422 | 0.846805 |
| ZMYM2    | 0.065905249  | 0.135275 | 0.186128 |
| ZMYM3    | -0.225416008 | 2.34E-07 | 9.10E-07 |

|         |              |          |          |
|---------|--------------|----------|----------|
| ZMYM4   | -0.056205267 | 0.202873 | 0.265486 |
| ZMYM5   | -0.088171827 | 0.045503 | 0.070217 |
| ZMYM6   | -0.339715947 | 2.23E-15 | 2.94E-14 |
| ZMYND10 | -0.265904932 | 8.77E-10 | 4.91E-09 |
| ZMYND11 | -0.088705906 | 0.044206 | 0.06841  |
| ZMYND12 | -0.283016678 | 6.10E-11 | 4.05E-10 |
| ZMYND15 | -0.415078518 | 7.25E-23 | 2.90E-21 |
| ZMYND17 | -0.069918448 | 0.113015 | 0.158642 |
| ZMYND19 | 0.180829576  | 3.66E-05 | 0.0001   |
| ZMYND8  | -0.027965003 | 0.526597 | 0.598693 |
| ZNF100  | -0.122918029 | 0.005218 | 0.009771 |
| ZNF101  | -0.062699055 | 0.155372 | 0.21022  |
| ZNF107  | -0.008493779 | 0.847515 | 0.879505 |
| ZNF10   | -0.213138039 | 1.05E-06 | 3.68E-06 |
| ZNF114  | 0.049788577  | 0.259389 | 0.328268 |
| ZNF117  | -0.245825687 | 1.59E-08 | 7.36E-08 |
| ZNF121  | 0.004707104  | 0.915136 | 0.933681 |
| ZNF124  | 0.037658679  | 0.39375  | 0.468657 |
| ZNF12   | -0.014541171 | 0.741999 | 0.791244 |
| ZNF131  | 0.187699764  | 1.81E-05 | 5.21E-05 |
| ZNF132  | -0.223160465 | 3.11E-07 | 1.19E-06 |
| ZNF133  | -0.130150813 | 0.003086 | 0.006014 |
| ZNF134  | -0.087273355 | 0.047758 | 0.073306 |
| ZNF135  | -0.146355775 | 0.000865 | 0.001859 |
| ZNF136  | -0.257497407 | 3.04E-09 | 1.56E-08 |
| ZNF137  | -0.222606173 | 3.33E-07 | 1.27E-06 |
| ZNF138  | 0.148629641  | 0.000716 | 0.001563 |
| ZNF140  | 0.148275642  | 0.000737 | 0.001607 |
| ZNF141  | -0.1935252   | 9.73E-06 | 2.92E-05 |
| ZNF142  | -0.106201065 | 0.015907 | 0.027052 |
| ZNF143  | 0.292841569  | 1.21E-11 | 8.96E-11 |
| ZNF146  | 0.215965419  | 7.51E-07 | 2.69E-06 |
| ZNF148  | 0.107924447  | 0.01427  | 0.024537 |
| ZNF14   | -0.212041109 | 1.20E-06 | 4.15E-06 |
| ZNF154  | -0.359703177 | 3.55E-17 | 6.11E-16 |
| ZNF155  | -0.160305875 | 0.000259 | 0.000614 |
| ZNF157  | -0.068264579 | 0.121812 | 0.16953  |
| ZNF160  | -0.325155626 | 3.80E-14 | 4.12E-13 |
| ZNF165  | 0.061742819  | 0.161784 | 0.217789 |
| ZNF167  | -0.300224625 | 3.46E-12 | 2.76E-11 |
| ZNF169  | -0.258003338 | 2.82E-09 | 1.45E-08 |
| ZNF16   | 0.111458452  | 0.011369 | 0.019953 |
| ZNF174  | -0.062370358 | 0.157554 | 0.212826 |
| ZNF175  | -0.226013969 | 2.17E-07 | 8.48E-07 |



|         |              |          |          |
|---------|--------------|----------|----------|
| ZNF177  | -0.206038038 | 2.42E-06 | 7.96E-06 |
| ZNF17   | -0.273192186 | 2.88E-10 | 1.73E-09 |
| ZNF180  | -0.021312659 | 0.629422 | 0.691653 |
| ZNF181  | -0.145190535 | 0.000952 | 0.002031 |
| ZNF182  | -0.150040247 | 0.000635 | 0.0014   |
| ZNF184  | -0.057987123 | 0.188898 | 0.249336 |
| ZNF185  | 0.059863329  | 0.174962 | 0.233439 |
| ZNF187  | -0.117864881 | 0.007415 | 0.013494 |
| ZNF189  | -0.20671113  | 2.24E-06 | 7.40E-06 |
| ZNF18   | -0.193862154 | 9.39E-06 | 2.82E-05 |
| ZNF192  | -0.109885244 | 0.012589 | 0.021863 |
| ZNF193  | -0.07737705  | 0.079374 | 0.115873 |
| ZNF195  | 0.055955472  | 0.204891 | 0.267688 |
| ZNF197  | -0.173507744 | 7.56E-05 | 0.000196 |
| ZNF19   | -0.28974007  | 2.03E-11 | 1.45E-10 |
| ZNF200  | 0.162379629  | 0.000215 | 0.000518 |
| ZNF202  | -0.018523876 | 0.674932 | 0.732625 |
| ZNF204P | -0.374582074 | 1.34E-18 | 2.86E-17 |
| ZNF205  | -0.137102331 | 0.001818 | 0.00369  |
| ZNF207  | 0.199090671  | 5.29E-06 | 1.65E-05 |
| ZNF208  | -0.090086189 | 0.040996 | 0.063908 |
| ZNF20   | -0.193203391 | 1.01E-05 | 3.02E-05 |
| ZNF211  | -0.418172764 | 3.23E-23 | 1.37E-21 |
| ZNF212  | -0.110393051 | 0.012183 | 0.021225 |
| ZNF213  | -0.222539333 | 3.36E-07 | 1.27E-06 |
| ZNF214  | -0.251868089 | 6.81E-09 | 3.33E-08 |
| ZNF215  | 0.01248428   | 0.777456 | 0.820908 |
| ZNF217  | -0.051314132 | 0.245057 | 0.312625 |
| ZNF219  | -0.272907068 | 3.01E-10 | 1.80E-09 |
| ZNF221  | -0.031088198 | 0.481458 | 0.555293 |
| ZNF222  | -0.011536848 | 0.79395  | 0.834923 |
| ZNF223  | -0.104928891 | 0.017219 | 0.029061 |
| ZNF224  | -0.356516886 | 7.01E-17 | 1.15E-15 |
| ZNF225  | -0.180900177 | 3.64E-05 | 9.94E-05 |
| ZNF226  | -0.17146906  | 9.20E-05 | 0.000235 |
| ZNF227  | -0.046005779 | 0.297387 | 0.368654 |
| ZNF229  | 0.07222141   | 0.101605 | 0.144239 |
| ZNF22   | 0.141955195  | 0.001238 | 0.00259  |
| ZNF230  | -0.169972636 | 0.000106 | 0.000269 |
| ZNF232  | 0.04524862   | 0.305418 | 0.377159 |
| ZNF233  | -0.075616208 | 0.086475 | 0.124917 |
| ZNF234  | -0.090643265 | 0.039758 | 0.062113 |
| ZNF235  | -0.113345919 | 0.010045 | 0.017828 |
| ZNF236  | -0.107792522 | 0.014389 | 0.02472  |

|         |              |          |          |
|---------|--------------|----------|----------|
| ZNF238  | -0.276384752 | 1.75E-10 | 1.09E-09 |
| ZNF239  | 0.218503738  | 5.52E-07 | 2.02E-06 |
| ZNF23   | -0.232266045 | 9.76E-08 | 4.02E-07 |
| ZNF248  | -0.213785693 | 9.76E-07 | 3.43E-06 |
| ZNF24   | -0.02525003  | 0.567516 | 0.636097 |
| ZNF250  | -0.113877077 | 0.009698 | 0.01727  |
| ZNF251  | -0.053055177 | 0.229389 | 0.295237 |
| ZNF252  | 0.106750769  | 0.015367 | 0.026224 |
| ZNF253  | -0.146074638 | 0.000885 | 0.001899 |
| ZNF254  | -0.131677965 | 0.002753 | 0.005414 |
| ZNF256  | -0.058852342 | 0.182373 | 0.241794 |
| ZNF257  | -0.010236139 | 0.816743 | 0.853731 |
| ZNF259  | 0.381184313  | 2.96E-19 | 6.99E-18 |
| ZNF25   | -0.329425854 | 1.68E-14 | 1.92E-13 |
| ZNF260  | 0.117322297  | 0.007694 | 0.013954 |
| ZNF263  | -0.164783874 | 0.000173 | 0.000422 |
| ZNF264  | -0.306062126 | 1.25E-12 | 1.08E-11 |
| ZNF266  | -0.306632148 | 1.13E-12 | 9.82E-12 |
| ZNF267  | 0.116229313  | 0.008286 | 0.014937 |
| ZNF268  | 0.065056853  | 0.140387 | 0.192288 |
| ZNF26   | 0.04389234   | 0.320157 | 0.392885 |
| ZNF271  | 0.042957288  | 0.330585 | 0.404093 |
| ZNF273  | 0.041213896  | 0.350605 | 0.425172 |
| ZNF274  | -0.079904484 | 0.070015 | 0.10351  |
| ZNF275  | -0.136028933 | 0.001976 | 0.003988 |
| ZNF276  | -0.337243686 | 3.65E-15 | 4.64E-14 |
| ZNF277  | 0.124168679  | 0.004774 | 0.009004 |
| ZNF280A | 0.258619942  | 2.58E-09 | 1.34E-08 |
| ZNF280B | 0.053673504  | 0.223999 | 0.289156 |
| ZNF280C | 0.112125233  | 0.010885 | 0.019177 |
| ZNF280D | -0.09095373  | 0.039081 | 0.061138 |
| ZNF281  | 0.133991391  | 0.002311 | 0.004605 |
| ZNF282  | -0.0486187   | 0.270764 | 0.340637 |
| ZNF283  | 0.037731801  | 0.392831 | 0.46771  |
| ZNF284  | -0.046027482 | 0.297159 | 0.368509 |
| ZNF285  | 0.009470012  | 0.830242 | 0.864992 |
| ZNF286A | 0.160735684  | 0.00025  | 0.000592 |
| ZNF286B | 0.027020919  | 0.540654 | 0.611406 |
| ZNF287  | -0.217511253 | 6.23E-07 | 2.26E-06 |
| ZNF28   | 0.126970008  | 0.003901 | 0.007461 |
| ZNF292  | -0.134143997 | 0.002284 | 0.004557 |
| ZNF295  | -0.190558032 | 1.34E-05 | 3.93E-05 |
| ZNF296  | -0.072210491 | 0.101657 | 0.144282 |
| ZNF2    | -0.144404969 | 0.001015 | 0.002157 |

|         |              |          |          |
|---------|--------------|----------|----------|
| ZNF300  | 0.150465581  | 0.000613 | 0.001353 |
| ZNF302  | -0.23482329  | 6.98E-08 | 2.94E-07 |
| ZNF304  | -0.153676328 | 0.000466 | 0.00105  |
| ZNF30   | -0.037524786 | 0.395435 | 0.470333 |
| ZNF311  | -0.159299597 | 0.000284 | 0.000667 |
| ZNF317  | -0.090879741 | 0.039241 | 0.061359 |
| ZNF318  | -0.083909408 | 0.057049 | 0.086105 |
| ZNF319  | -0.205922863 | 2.45E-06 | 8.06E-06 |
| ZNF320  | -0.078112506 | 0.076552 | 0.112228 |
| ZNF321  | -0.221884905 | 3.64E-07 | 1.37E-06 |
| ZNF322A | -0.104411222 | 0.017779 | 0.029941 |
| ZNF322B | -0.099546779 | 0.023871 | 0.039116 |
| ZNF323  | -0.083979843 | 0.05684  | 0.085842 |
| ZNF324B | -0.25634135  | 3.59E-09 | 1.82E-08 |
| ZNF324  | -0.294198553 | 9.66E-12 | 7.26E-11 |
| ZNF326  | 0.078176254  | 0.076311 | 0.111924 |
| ZNF329  | -0.107031792 | 0.015098 | 0.025828 |
| ZNF32   | 0.016761289  | 0.704334 | 0.759343 |
| ZNF330  | 0.047367253  | 0.283305 | 0.354096 |
| ZNF331  | -0.198915899 | 5.40E-06 | 1.68E-05 |
| ZNF333  | -0.333317765 | 7.91E-15 | 9.47E-14 |
| ZNF334  | -0.252607618 | 6.13E-09 | 3.02E-08 |
| ZNF335  | -0.137822919 | 0.001718 | 0.003505 |
| ZNF337  | -0.340811179 | 1.79E-15 | 2.40E-14 |
| ZNF33A  | -0.232227256 | 9.80E-08 | 4.04E-07 |
| ZNF33B  | -0.196270791 | 7.22E-06 | 2.21E-05 |
| ZNF341  | -0.103122691 | 0.019243 | 0.032182 |
| ZNF343  | -0.044607474 | 0.312329 | 0.384379 |
| ZNF345  | -0.361723914 | 2.30E-17 | 4.04E-16 |
| ZNF346  | -0.216669227 | 6.90E-07 | 2.48E-06 |
| ZNF347  | -0.210971654 | 1.36E-06 | 4.67E-06 |
| ZNF34   | -0.125085292 | 0.00447  | 0.008467 |
| ZNF350  | -0.131252299 | 0.002843 | 0.005574 |
| ZNF354A | -0.12981557  | 0.003164 | 0.006153 |
| ZNF354B | -0.312723137 | 3.80E-13 | 3.54E-12 |
| ZNF354C | -0.179709952 | 4.10E-05 | 0.000111 |
| ZNF358  | -0.142107618 | 0.001223 | 0.002561 |
| ZNF35   | 0.063719721  | 0.148743 | 0.202278 |
| ZNF362  | -0.381911078 | 2.50E-19 | 5.99E-18 |
| ZNF365  | -0.015089963 | 0.732627 | 0.783517 |
| ZNF366  | -0.311537367 | 4.71E-13 | 4.32E-12 |
| ZNF367  | 0.312643178  | 3.86E-13 | 3.59E-12 |
| ZNF37A  | -0.103100185 | 0.01927  | 0.032221 |
| ZNF37B  | -0.317724135 | 1.52E-13 | 1.51E-12 |

|          |              |          |          |
|----------|--------------|----------|----------|
| ZNF382   | -0.144924614 | 0.000973 | 0.002073 |
| ZNF383   | -0.095649116 | 0.029982 | 0.048162 |
| ZNF384   | 0.17537462   | 6.30E-05 | 0.000165 |
| ZNF385A  | -0.116929343 | 0.007902 | 0.014304 |
| ZNF385B  | -0.310053391 | 6.14E-13 | 5.56E-12 |
| ZNF385D  | -0.154160028 | 0.000446 | 0.00101  |
| ZNF389   | -0.169481429 | 0.000111 | 0.000281 |
| ZNF391   | -0.115799875 | 0.008529 | 0.015322 |
| ZNF394   | -0.117117219 | 0.007802 | 0.014139 |
| ZNF395   | -0.171231629 | 9.41E-05 | 0.00024  |
| ZNF396   | -0.274232584 | 2.45E-10 | 1.49E-09 |
| ZNF397OS | -0.222451083 | 3.40E-07 | 1.29E-06 |
| ZNF397   | -0.225665806 | 2.27E-07 | 8.83E-07 |
| ZNF398   | -0.010510763 | 0.811917 | 0.849798 |
| ZNF3     | 0.111570691  | 0.011286 | 0.019818 |
| ZNF404   | -0.151044665 | 0.000583 | 0.001293 |
| ZNF407   | -0.17393397  | 7.25E-05 | 0.000188 |
| ZNF408   | 0.01606193   | 0.716126 | 0.768946 |
| ZNF410   | 0.350351764  | 2.56E-16 | 3.83E-15 |
| ZNF414   | -0.162651859 | 0.00021  | 0.000506 |
| ZNF415   | -0.106276334 | 0.015832 | 0.026936 |
| ZNF416   | -0.042520063 | 0.335535 | 0.409418 |
| ZNF417   | -0.268520577 | 5.90E-10 | 3.39E-09 |
| ZNF418   | -0.246101047 | 1.53E-08 | 7.10E-08 |
| ZNF419   | -0.221808051 | 3.68E-07 | 1.39E-06 |
| ZNF41    | -0.097440267 | 0.027025 | 0.043823 |
| ZNF420   | 0.029660621  | 0.501826 | 0.574682 |
| ZNF423   | -0.268761403 | 5.69E-10 | 3.28E-09 |
| ZNF425   | -0.200937758 | 4.31E-06 | 1.37E-05 |
| ZNF426   | -0.007793923 | 0.859944 | 0.889801 |
| ZNF428   | -0.079397326 | 0.071817 | 0.105947 |
| ZNF429   | -0.277906993 | 1.38E-10 | 8.70E-10 |
| ZNF430   | -0.078463879 | 0.075232 | 0.110472 |
| ZNF431   | -0.232367285 | 9.63E-08 | 3.98E-07 |
| ZNF432   | -0.075877732 | 0.08539  | 0.123571 |
| ZNF433   | -0.181423997 | 3.45E-05 | 9.46E-05 |
| ZNF434   | -0.14103541  | 0.001333 | 0.002769 |
| ZNF436   | -0.081065663 | 0.066029 | 0.098257 |
| ZNF438   | -0.222172167 | 3.52E-07 | 1.33E-06 |
| ZNF439   | -0.315610558 | 2.25E-13 | 2.17E-12 |
| ZNF43    | -0.254354613 | 4.78E-09 | 2.39E-08 |
| ZNF440   | -0.239726521 | 3.64E-08 | 1.60E-07 |
| ZNF441   | -0.352142766 | 1.76E-16 | 2.70E-15 |
| ZNF442   | -0.255894798 | 3.83E-09 | 1.94E-08 |

|         |              |          |          |
|---------|--------------|----------|----------|
| ZNF443  | -0.085371254 | 0.052842 | 0.080387 |
| ZNF444  | -0.293535246 | 1.08E-11 | 8.04E-11 |
| ZNF445  | -0.198811861 | 5.46E-06 | 1.70E-05 |
| ZNF446  | -0.308275482 | 8.44E-13 | 7.48E-12 |
| ZNF449  | -0.180788804 | 3.68E-05 | 0.0001   |
| ZNF44   | -0.340820418 | 1.79E-15 | 2.39E-14 |
| ZNF451  | -0.079246708 | 0.072359 | 0.106637 |
| ZNF454  | -0.200050842 | 4.76E-06 | 1.50E-05 |
| ZNF45   | -0.091112488 | 0.038739 | 0.06065  |
| ZNF460  | 0.04328588   | 0.326896 | 0.400147 |
| ZNF461  | -0.110924419 | 0.011771 | 0.020562 |
| ZNF462  | -0.316722651 | 1.83E-13 | 1.79E-12 |
| ZNF467  | -0.087643539 | 0.046818 | 0.072051 |
| ZNF468  | 0.190833365  | 1.30E-05 | 3.83E-05 |
| ZNF469  | 0.004671641  | 0.915773 | 0.934092 |
| ZNF470  | -0.206956608 | 2.17E-06 | 7.21E-06 |
| ZNF471  | -0.285089916 | 4.36E-11 | 2.96E-10 |
| ZNF473  | 0.157515648  | 0.000333 | 0.00077  |
| ZNF474  | -0.211389979 | 1.30E-06 | 4.46E-06 |
| ZNF479  | 0.085892432  | 0.051406 | 0.078441 |
| ZNF480  | 0.099322207  | 0.024191 | 0.039601 |
| ZNF483  | -0.244412283 | 1.93E-08 | 8.84E-08 |
| ZNF484  | -0.116122529 | 0.008345 | 0.015035 |
| ZNF485  | 0.196326309  | 7.18E-06 | 2.20E-05 |
| ZNF486  | -0.128279964 | 0.003544 | 0.006827 |
| ZNF487  | -0.008284326 | 0.851231 | 0.882444 |
| ZNF488  | 0.116633445  | 0.008062 | 0.014576 |
| ZNF48   | 0.130184992  | 0.003078 | 0.006    |
| ZNF490  | -0.346035285 | 6.23E-16 | 8.87E-15 |
| ZNF491  | -0.292582626 | 1.27E-11 | 9.34E-11 |
| ZNF492  | 0.062187112  | 0.15878  | 0.21428  |
| ZNF493  | -0.37521801  | 1.16E-18 | 2.50E-17 |
| ZNF496  | -0.025604996 | 0.562081 | 0.631492 |
| ZNF497  | -0.272509362 | 3.20E-10 | 1.91E-09 |
| ZNF498  | -0.116532322 | 0.008118 | 0.014665 |
| ZNF500  | -0.364079837 | 1.38E-17 | 2.52E-16 |
| ZNF501  | -0.05647732  | 0.200692 | 0.262898 |
| ZNF502  | -0.160948646 | 0.000245 | 0.000582 |
| ZNF503  | -0.117503139 | 0.0076   | 0.013801 |
| ZNF506  | -0.190831591 | 1.30E-05 | 3.83E-05 |
| ZNF507  | 0.015594829  | 0.72404  | 0.776026 |
| ZNF510  | -0.135255365 | 0.002097 | 0.004215 |
| ZNF511  | 0.248126158  | 1.15E-08 | 5.46E-08 |
| ZNF512B | -0.12376502  | 0.004913 | 0.009243 |

|         |              |          |          |
|---------|--------------|----------|----------|
| ZNF512  | -0.300672071 | 3.20E-12 | 2.57E-11 |
| ZNF513  | -0.193580412 | 9.68E-06 | 2.90E-05 |
| ZNF514  | -0.272350554 | 3.28E-10 | 1.96E-09 |
| ZNF516  | -0.179801102 | 4.06E-05 | 0.00011  |
| ZNF517  | -0.113205435 | 0.010139 | 0.01798  |
| ZNF518A | 0.05029088   | 0.254607 | 0.323138 |
| ZNF518B | 0.026722039  | 0.545143 | 0.615785 |
| ZNF519  | -0.038306948 | 0.385652 | 0.460369 |
| ZNF521  | -0.24612494  | 1.52E-08 | 7.08E-08 |
| ZNF524  | -0.099663046 | 0.023707 | 0.038872 |
| ZNF525  | 0.060464071  | 0.170666 | 0.228331 |
| ZNF526  | 0.040935612  | 0.35387  | 0.428521 |
| ZNF527  | -0.095432953 | 0.030357 | 0.048678 |
| ZNF528  | -0.175442376 | 6.26E-05 | 0.000164 |
| ZNF529  | -0.189570625 | 1.48E-05 | 4.34E-05 |
| ZNF530  | 0.020147716  | 0.648275 | 0.708498 |
| ZNF532  | 0.016288486  | 0.712299 | 0.765947 |
| ZNF534  | 0.044238919  | 0.316347 | 0.388734 |
| ZNF536  | -0.2776472   | 1.44E-10 | 9.04E-10 |
| ZNF540  | -0.468862612 | 1.66E-29 | 1.69E-27 |
| ZNF541  | -0.174031036 | 7.18E-05 | 0.000187 |
| ZNF542  | -0.054579313 | 0.216268 | 0.280607 |
| ZNF543  | -0.121498911 | 0.005766 | 0.010703 |
| ZNF544  | 0.161694457  | 0.000229 | 0.000548 |
| ZNF546  | -0.34648494  | 5.68E-16 | 8.14E-15 |
| ZNF547  | -0.261933508 | 1.59E-09 | 8.52E-09 |
| ZNF548  | -0.210720808 | 1.40E-06 | 4.80E-06 |
| ZNF549  | -0.184906093 | 2.42E-05 | 6.80E-05 |
| ZNF550  | -0.145914926 | 0.000897 | 0.001921 |
| ZNF551  | -0.067523154 | 0.125926 | 0.174405 |
| ZNF552  | -0.295481185 | 7.78E-12 | 5.93E-11 |
| ZNF554  | -0.36283381  | 1.81E-17 | 3.23E-16 |
| ZNF555  | 0.013010281  | 0.768341 | 0.813777 |
| ZNF556  | 0.095388968  | 0.030434 | 0.048782 |
| ZNF557  | -0.238146663 | 4.50E-08 | 1.95E-07 |
| ZNF558  | -0.071882912 | 0.103223 | 0.146227 |
| ZNF559  | -0.202472742 | 3.63E-06 | 1.16E-05 |
| ZNF560  | 0.083842686  | 0.057247 | 0.086379 |
| ZNF561  | -0.067939268 | 0.123604 | 0.171605 |
| ZNF562  | 0.015532443  | 0.725099 | 0.776995 |
| ZNF563  | -0.319126061 | 1.18E-13 | 1.18E-12 |
| ZNF564  | -0.286341679 | 3.56E-11 | 2.44E-10 |
| ZNF565  | -0.068861532 | 0.118577 | 0.165419 |
| ZNF566  | -0.125386755 | 0.004374 | 0.008299 |

|         |              |          |          |
|---------|--------------|----------|----------|
| ZNF567  | 0.015490039  | 0.72582  | 0.777558 |
| ZNF568  | -0.187417816 | 1.86E-05 | 5.35E-05 |
| ZNF569  | -0.043752703 | 0.321701 | 0.394609 |
| ZNF570  | 0.007520095  | 0.864817 | 0.893886 |
| ZNF571  | -0.211408347 | 1.29E-06 | 4.45E-06 |
| ZNF572  | 0.017065377  | 0.699228 | 0.754776 |
| ZNF573  | -0.174900437 | 6.60E-05 | 0.000173 |
| ZNF574  | -0.024845909 | 0.573734 | 0.641627 |
| ZNF575  | -0.234789324 | 7.01E-08 | 2.95E-07 |
| ZNF576  | 0.098463907  | 0.02545  | 0.041489 |
| ZNF577  | -0.228202864 | 1.65E-07 | 6.54E-07 |
| ZNF578  | -0.085978749 | 0.051171 | 0.078119 |
| ZNF579  | -0.063613754 | 0.149421 | 0.203131 |
| ZNF57   | -0.116448208 | 0.008164 | 0.014739 |
| ZNF580  | -0.212228508 | 1.17E-06 | 4.07E-06 |
| ZNF581  | 0.126785802  | 0.003953 | 0.007558 |
| ZNF582  | -0.188476835 | 1.67E-05 | 4.83E-05 |
| ZNF583  | -0.09663761  | 0.028317 | 0.045719 |
| ZNF584  | -0.125852543 | 0.00423  | 0.008039 |
| ZNF585A | 0.036637134  | 0.406716 | 0.481487 |
| ZNF585B | -0.055626278 | 0.207572 | 0.270749 |
| ZNF586  | -0.155546815 | 0.000396 | 0.000903 |
| ZNF587  | -0.205314644 | 2.63E-06 | 8.60E-06 |
| ZNF589  | -0.381964035 | 2.47E-19 | 5.93E-18 |
| ZNF592  | -0.141678572 | 0.001266 | 0.002644 |
| ZNF593  | 0.094003453  | 0.03294  | 0.052358 |
| ZNF594  | -0.258481506 | 2.63E-09 | 1.36E-08 |
| ZNF595  | -0.037976321 | 0.389769 | 0.464507 |
| ZNF596  | -0.251060956 | 7.63E-09 | 3.72E-08 |
| ZNF597  | -0.171893125 | 8.83E-05 | 0.000226 |
| ZNF598  | 0.126661824  | 0.003989 | 0.00762  |
| ZNF599  | -0.267825467 | 6.56E-10 | 3.75E-09 |
| ZNF600  | -0.125435672 | 0.004359 | 0.008272 |
| ZNF605  | 0.084663008  | 0.054847 | 0.083158 |
| ZNF606  | -0.163266854 | 0.000198 | 0.00048  |
| ZNF607  | -0.000327283 | 0.994088 | 0.995682 |
| ZNF608  | -0.431889519 | 8.14E-25 | 4.40E-23 |
| ZNF609  | -0.151155692 | 0.000578 | 0.001282 |
| ZNF610  | 0.003154978  | 0.94306  | 0.954715 |
| ZNF611  | -0.131188357 | 0.002856 | 0.005597 |
| ZNF613  | 0.008413549  | 0.848938 | 0.880658 |
| ZNF614  | 0.074431857  | 0.091533 | 0.131397 |
| ZNF615  | -0.140732898 | 0.001365 | 0.002833 |
| ZNF616  | 0.030331037  | 0.492205 | 0.565446 |

|        |              |          |          |
|--------|--------------|----------|----------|
| ZNF618 | -0.126855486 | 0.003933 | 0.007521 |
| ZNF619 | -0.099014593 | 0.024636 | 0.040267 |
| ZNF620 | -0.047977253 | 0.277144 | 0.347634 |
| ZNF621 | -0.207407782 | 2.06E-06 | 6.87E-06 |
| ZNF622 | 0.165290265  | 0.000165 | 0.000404 |
| ZNF623 | 0.188322208  | 1.69E-05 | 4.90E-05 |
| ZNF624 | -0.074549107 | 0.091022 | 0.130785 |
| ZNF625 | -0.220642577 | 4.25E-07 | 1.59E-06 |
| ZNF626 | -0.166955119 | 0.000141 | 0.00035  |
| ZNF627 | 0.053316782  | 0.227097 | 0.29257  |
| ZNF628 | -0.090665088 | 0.03971  | 0.062043 |
| ZNF629 | -0.274480975 | 2.36E-10 | 1.44E-09 |
| ZNF630 | -0.082197555 | 0.062324 | 0.093307 |
| ZNF638 | -0.171357094 | 9.30E-05 | 0.000238 |
| ZNF639 | 0.308641062  | 7.91E-13 | 7.04E-12 |
| ZNF641 | -0.095246918 | 0.030683 | 0.049134 |
| ZNF642 | 0.029786935  | 0.500006 | 0.572992 |
| ZNF643 | 0.285278817  | 4.23E-11 | 2.87E-10 |
| ZNF644 | -0.012309507 | 0.780491 | 0.823417 |
| ZNF645 | -0.002542564 | 0.954099 | 0.964623 |
| ZNF646 | -0.216405403 | 7.12E-07 | 2.56E-06 |
| ZNF648 | 0.01396145   | 0.751941 | 0.799883 |
| ZNF649 | -0.022965558 | 0.603082 | 0.668167 |
| ZNF652 | -0.216321022 | 7.20E-07 | 2.58E-06 |
| ZNF653 | -0.211085964 | 1.34E-06 | 4.62E-06 |
| ZNF654 | -0.149124157 | 0.000686 | 0.001505 |
| ZNF655 | -0.132643748 | 0.00256  | 0.005062 |
| ZNF658 | -0.332321868 | 9.60E-15 | 1.13E-13 |
| ZNF660 | -0.263455064 | 1.26E-09 | 6.90E-09 |
| ZNF662 | -0.329554846 | 1.64E-14 | 1.88E-13 |
| ZNF664 | 0.055385678  | 0.209548 | 0.272951 |
| ZNF665 | -0.16719505  | 0.000138 | 0.000343 |
| ZNF667 | -0.111319674 | 0.011472 | 0.020119 |
| ZNF668 | 0.038666837  | 0.381201 | 0.455709 |
| ZNF669 | 0.067054116  | 0.128583 | 0.177728 |
| ZNF670 | 0.125310401  | 0.004399 | 0.008341 |
| ZNF671 | -0.354739909 | 1.02E-16 | 1.62E-15 |
| ZNF672 | -0.184052568 | 2.64E-05 | 7.38E-05 |
| ZNF673 | -0.15512144  | 0.000411 | 0.000935 |
| ZNF674 | -0.071786376 | 0.103688 | 0.146768 |
| ZNF675 | -0.016858995 | 0.702692 | 0.757982 |
| ZNF676 | 0.040351513  | 0.360786 | 0.435523 |
| ZNF677 | -0.137956374 | 0.0017   | 0.003471 |
| ZNF678 | -0.000958503 | 0.982688 | 0.987133 |



|         |              |          |          |
|---------|--------------|----------|----------|
| ZNF679  | 0.087140668  | 0.048099 | 0.073807 |
| ZNF680  | 0.076771279  | 0.081762 | 0.118855 |
| ZNF681  | 0.090320775  | 0.040471 | 0.063143 |
| ZNF682  | -0.338719907 | 2.72E-15 | 3.54E-14 |
| ZNF683  | -0.044388    | 0.314718 | 0.387017 |
| ZNF684  | -0.106755518 | 0.015363 | 0.026219 |
| ZNF687  | -0.074119735 | 0.092905 | 0.133031 |
| ZNF688  | -0.263237745 | 1.31E-09 | 7.11E-09 |
| ZNF689  | -0.022353773 | 0.612774 | 0.676729 |
| ZNF691  | -0.174213457 | 7.06E-05 | 0.000184 |
| ZNF692  | -0.183546801 | 2.78E-05 | 7.74E-05 |
| ZNF695  | 0.32678789   | 2.79E-14 | 3.08E-13 |
| ZNF696  | 0.049836785  | 0.258927 | 0.327705 |
| ZNF697  | 0.215267783  | 8.17E-07 | 2.91E-06 |
| ZNF699  | -0.007901875 | 0.858025 | 0.888197 |
| ZNF69   | -0.24612236  | 1.52E-08 | 7.08E-08 |
| ZNF700  | -0.30285975  | 2.19E-12 | 1.81E-11 |
| ZNF701  | 0.02096255   | 0.635063 | 0.696496 |
| ZNF702P | 0.020170755  | 0.6479   | 0.708127 |
| ZNF703  | -0.013025952 | 0.76807  | 0.813533 |
| ZNF704  | -0.283453596 | 5.68E-11 | 3.78E-10 |
| ZNF705A | -0.041923196 | 0.342369 | 0.416511 |
| ZNF705D | -0.029706991 | 0.501158 | 0.574147 |
| ZNF706  | 0.296973948  | 6.03E-12 | 4.66E-11 |
| ZNF707  | -0.111481335 | 0.011352 | 0.019929 |
| ZNF708  | -0.198130401 | 5.89E-06 | 1.83E-05 |
| ZNF709  | -0.311010144 | 5.17E-13 | 4.73E-12 |
| ZNF70   | -0.254123754 | 4.94E-09 | 2.46E-08 |
| ZNF710  | -0.049785606 | 0.259417 | 0.328274 |
| ZNF711  | -0.069393587 | 0.115751 | 0.162019 |
| ZNF713  | -0.111601827 | 0.011263 | 0.019783 |
| ZNF714  | -0.029077472 | 0.510276 | 0.582596 |
| ZNF716  | 0.039999258  | 0.364997 | 0.43965  |
| ZNF717  | -0.085399457 | 0.052763 | 0.080303 |
| ZNF718  | 0.03030696   | 0.492549 | 0.565776 |
| ZNF71   | 0.02729483   | 0.536557 | 0.607459 |
| ZNF720  | -0.120180845 | 0.006322 | 0.011646 |
| ZNF721  | -0.131768559 | 0.002734 | 0.005381 |
| ZNF727  | -0.098129314 | 0.025956 | 0.042237 |
| ZNF732  | -0.062579021 | 0.156166 | 0.21118  |
| ZNF735  | 0.012446249  | 0.778116 | 0.821475 |
| ZNF737  | -0.280546362 | 9.07E-11 | 5.88E-10 |
| ZNF738  | -0.054222955 | 0.219286 | 0.283842 |
| ZNF740  | 0.024077023  | 0.585653 | 0.652256 |

|         |              |          |          |
|---------|--------------|----------|----------|
| ZNF746  | 0.086764619  | 0.049076 | 0.075211 |
| ZNF747  | -0.139327278 | 0.001526 | 0.003142 |
| ZNF749  | 0.038356403  | 0.385039 | 0.459691 |
| ZNF74   | -0.030162654 | 0.494612 | 0.567917 |
| ZNF750  | -0.381158376 | 2.97E-19 | 7.03E-18 |
| ZNF75A  | -0.072063285 | 0.102358 | 0.145143 |
| ZNF75D  | -0.304548857 | 1.63E-12 | 1.38E-11 |
| ZNF761  | 0.057252861  | 0.194569 | 0.255774 |
| ZNF763  | -0.436823608 | 2.08E-25 | 1.23E-23 |
| ZNF764  | -0.168229987 | 0.000125 | 0.000313 |
| ZNF765  | 0.18337718   | 2.83E-05 | 7.86E-05 |
| ZNF766  | -0.113077376 | 0.010225 | 0.018119 |
| ZNF767  | -0.354225672 | 1.14E-16 | 1.79E-15 |
| ZNF768  | -0.012363589 | 0.779552 | 0.822643 |
| ZNF76   | -0.159381535 | 0.000282 | 0.000663 |
| ZNF770  | 0.122174814  | 0.005499 | 0.010256 |
| ZNF771  | 0.101424343  | 0.021333 | 0.035361 |
| ZNF772  | -0.030020598 | 0.496648 | 0.56984  |
| ZNF773  | -0.1472423   | 0.000803 | 0.001738 |
| ZNF774  | -0.169512191 | 0.000111 | 0.00028  |
| ZNF775  | -0.039295001 | 0.373508 | 0.448389 |
| ZNF776  | -0.257182125 | 3.18E-09 | 1.62E-08 |
| ZNF777  | 0.045834928  | 0.299187 | 0.370586 |
| ZNF778  | -0.208603574 | 1.80E-06 | 6.06E-06 |
| ZNF77   | -0.064664671 | 0.1428   | 0.195258 |
| ZNF780A | -0.170061571 | 0.000105 | 0.000267 |
| ZNF780B | -0.276676583 | 1.67E-10 | 1.04E-09 |
| ZNF781  | -0.247160129 | 1.32E-08 | 6.18E-08 |
| ZNF782  | -0.272108584 | 3.41E-10 | 2.03E-09 |
| ZNF784  | -0.300396205 | 3.36E-12 | 2.69E-11 |
| ZNF785  | -0.235671365 | 6.24E-08 | 2.65E-07 |
| ZNF786  | -0.047384952 | 0.283125 | 0.353893 |
| ZNF787  | -0.039944684 | 0.365652 | 0.440333 |
| ZNF788  | -0.106089715 | 0.016018 | 0.027213 |
| ZNF789  | -0.22942365  | 1.41E-07 | 5.66E-07 |
| ZNF790  | -0.196888419 | 6.75E-06 | 2.07E-05 |
| ZNF791  | -0.169559842 | 0.00011  | 0.000279 |
| ZNF792  | -0.105681596 | 0.016431 | 0.027873 |
| ZNF793  | -0.109634666 | 0.012793 | 0.022186 |
| ZNF799  | -0.123180811 | 0.005121 | 0.009607 |
| ZNF79   | -0.219046552 | 5.17E-07 | 1.91E-06 |
| ZNF7    | 0.08188264   | 0.063337 | 0.094625 |
| ZNF800  | 0.097473065  | 0.026973 | 0.043754 |
| ZNF804A | -0.13187079  | 0.002714 | 0.005345 |

|         |              |          |          |
|---------|--------------|----------|----------|
| ZNF804B | 0.02618298   | 0.553285 | 0.62307  |
| ZNF805  | -0.195417541 | 7.93E-06 | 2.41E-05 |
| ZNF808  | -0.224626769 | 2.59E-07 | 9.98E-07 |
| ZNF80   | -0.209801942 | 1.56E-06 | 5.30E-06 |
| ZNF813  | 0.167055282  | 0.00014  | 0.000347 |
| ZNF814  | -0.294977336 | 8.47E-12 | 6.42E-11 |
| ZNF815  | -0.211507483 | 1.28E-06 | 4.41E-06 |
| ZNF816A | -0.060667582 | 0.169228 | 0.226727 |
| ZNF81   | -0.043423623 | 0.325357 | 0.398532 |
| ZNF821  | -0.113935108 | 0.009661 | 0.017211 |
| ZNF823  | -0.072930515 | 0.098283 | 0.140079 |
| ZNF826  | -0.076188255 | 0.084114 | 0.121885 |
| ZNF827  | -0.067813897 | 0.1243   | 0.172416 |
| ZNF828  | 0.043507423  | 0.324424 | 0.397461 |
| ZNF829  | -0.05904506  | 0.180943 | 0.2402   |
| ZNF830  | -0.163973776 | 0.000186 | 0.000452 |
| ZNF831  | -0.271785347 | 3.58E-10 | 2.12E-09 |
| ZNF833  | -0.054808114 | 0.214345 | 0.278402 |
| ZNF835  | -0.232080076 | 9.99E-08 | 4.11E-07 |
| ZNF836  | -0.262496579 | 1.46E-09 | 7.89E-09 |
| ZNF837  | -0.213241712 | 1.04E-06 | 3.64E-06 |
| ZNF839  | -0.203909257 | 3.08E-06 | 9.98E-06 |
| ZNF83   | -0.301094863 | 2.97E-12 | 2.40E-11 |
| ZNF841  | -0.162100195 | 0.000221 | 0.00053  |
| ZNF843  | -0.210460236 | 1.45E-06 | 4.94E-06 |
| ZNF844  | -0.174050792 | 7.17E-05 | 0.000186 |
| ZNF845  | 0.086022047  | 0.051054 | 0.077958 |
| ZNF846  | -0.364820084 | 1.17E-17 | 2.16E-16 |
| ZNF84   | -0.059900358 | 0.174695 | 0.233113 |
| ZNF853  | -0.177113088 | 5.31E-05 | 0.000141 |
| ZNF85   | -0.107769734 | 0.01441  | 0.024751 |
| ZNF860  | 0.041479415  | 0.347508 | 0.421838 |
| ZNF862  | -0.403520293 | 1.38E-21 | 4.62E-20 |
| ZNF876P | 0.026112843  | 0.554349 | 0.623998 |
| ZNF878  | 0.030999416  | 0.482712 | 0.556459 |
| ZNF879  | -0.162874845 | 0.000206 | 0.000497 |
| ZNF880  | -0.080920025 | 0.066518 | 0.098919 |
| ZNF883  | 0.152356303  | 0.000522 | 0.001166 |
| ZNF8    | 0.022577386  | 0.609223 | 0.673664 |
| ZNF90   | 0.027571705  | 0.532431 | 0.603951 |
| ZNF91   | -0.219405972 | 4.95E-07 | 1.83E-06 |
| ZNF92   | 0.222394665  | 3.42E-07 | 1.30E-06 |
| ZNF93   | 0.071142773  | 0.10683  | 0.150757 |
| ZNF98   | 0.049289451  | 0.264201 | 0.33345  |

|           |              |          |          |
|-----------|--------------|----------|----------|
| ZNF99     | 0.018080886  | 0.682278 | 0.739273 |
| ZNFX1     | -0.165783534 | 0.000157 | 0.000387 |
| ZNHIT1    | 0.121415318  | 0.0058   | 0.01076  |
| ZNHIT2    | -0.156182685 | 0.000374 | 0.000857 |
| ZNHIT3    | 0.212543782  | 1.13E-06 | 3.93E-06 |
| ZNHIT6    | -0.006211095 | 0.888177 | 0.912416 |
| ZNRD1     | 0.24918366   | 9.94E-09 | 4.77E-08 |
| ZNRF1     | 0.11299246   | 0.010282 | 0.018211 |
| ZNRF2     | 0.099870742  | 0.023415 | 0.038451 |
| ZNRF3     | -0.126261946 | 0.004106 | 0.007826 |
| ZNRF4     | -0.021558719 | 0.62547  | 0.688203 |
| ZP1       | 0.053173985  | 0.228346 | 0.294046 |
| ZP2       | -0.037153042 | 0.400136 | 0.47471  |
| ZP3       | 0.265681658  | 9.07E-10 | 5.08E-09 |
| ZP4       | 0.137963436  | 0.001699 | 0.00347  |
| ZPBP2     | -0.020888139 | 0.636265 | 0.697547 |
| ZPBP      | -0.098799166 | 0.024952 | 0.04074  |
| ZPLD1     | 0.006380737  | 0.885144 | 0.910002 |
| ZRANB1    | -0.037368043 | 0.397413 | 0.472208 |
| ZRANB2    | -0.130641257 | 0.002976 | 0.005816 |
| ZRANB3    | 0.328921315  | 1.85E-14 | 2.10E-13 |
| ZRSR2     | -0.416766876 | 4.67E-23 | 1.92E-21 |
| ZSCAN10   | -0.034058834 | 0.440551 | 0.514864 |
| ZSCAN12P1 | -4.04E-06    | 0.999927 | 0.999963 |
| ZSCAN12   | -0.087030474 | 0.048384 | 0.074226 |
| ZSCAN16   | -0.009201999 | 0.834976 | 0.868793 |
| ZSCAN18   | -0.281735333 | 7.50E-11 | 4.91E-10 |
| ZSCAN1    | -0.152221869 | 0.000528 | 0.001178 |
| ZSCAN20   | 0.029754968  | 0.500466 | 0.573388 |
| ZSCAN21   | 0.0873891    | 0.047463 | 0.072919 |
| ZSCAN22   | -0.211025635 | 1.35E-06 | 4.65E-06 |
| ZSCAN23   | -0.188826772 | 1.61E-05 | 4.66E-05 |
| ZSCAN29   | 0.00484922   | 0.912584 | 0.931695 |
| ZSCAN2    | 0.101247677  | 0.021562 | 0.035703 |
| ZSCAN4    | -0.303610201 | 1.92E-12 | 1.60E-11 |
| ZSCAN5A   | -0.024621523 | 0.577201 | 0.644746 |
| ZSCAN5B   | 0.016070844  | 0.715975 | 0.768825 |
| ZSWIM1    | 0.010620592  | 0.809989 | 0.848135 |
| ZSWIM2    | -0.005151317 | 0.907162 | 0.927486 |
| ZSWIM3    | 0.055309711  | 0.210174 | 0.273678 |
| ZSWIM4    | -0.188148234 | 1.72E-05 | 4.99E-05 |
| ZSWIM5    | -0.256811387 | 3.35E-09 | 1.71E-08 |
| ZSWIM6    | -0.160372966 | 0.000258 | 0.00061  |
| ZSWIM7    | -0.20424972  | 2.96E-06 | 9.62E-06 |

|           |              |          |          |
|-----------|--------------|----------|----------|
| ZUFSP     | 0.201571131  | 4.01E-06 | 1.28E-05 |
| ZW10      | 0.177448803  | 5.14E-05 | 0.000137 |
| ZWILCH    | 0.488751438  | 2.81E-32 | 4.71E-30 |
| ZWINT     | 0.473542847  | 3.83E-30 | 4.37E-28 |
| ZXDA      | -0.123436562 | 0.005029 | 0.009446 |
| ZXDB      | 0.139156426  | 0.001547 | 0.003179 |
| ZXDC      | -0.339450507 | 2.36E-15 | 3.09E-14 |
| ZYG11A    | 0.214886572  | 8.55E-07 | 3.03E-06 |
| ZYG11B    | -0.16951401  | 0.000111 | 0.00028  |
| ZYX       | -0.064245419 | 0.145414 | 0.198439 |
| ZZEF1     | -0.254717287 | 4.53E-09 | 2.27E-08 |
| ZZZ3      | 0.203488396  | 3.23E-06 | 1.04E-05 |
| psiTPTE22 | -0.023907929 | 0.58829  | 0.654645 |
| tAKR      | 0.008953003  | 0.83938  | 0.872512 |

---

**Table S5. Gene Ontology term annotation of *GNPNAT1* co-expressed genes.**

| Gene set   | Description                                      | Size | Leading edge number | ES       | NES     | P-value   | FDR      |
|------------|--------------------------------------------------|------|---------------------|----------|---------|-----------|----------|
| GO:0007059 | chromosome segregation                           | 262  | 85                  | 0.74971  | 2.849   | 0         | 0        |
| GO:0034470 | ncRNA processing                                 | 312  | 154                 | 0.71009  | 2.6894  | 0         | 0        |
| GO:0006413 | translational initiation                         | 184  | 104                 | 0.66586  | 2.435   | 0         | 0        |
| GO:0032200 | telomere organization                            | 136  | 46                  | 0.67666  | 2.3491  | 0         | 0        |
| GO:0031123 | RNA 3'-end processing                            | 111  | 52                  | 0.68192  | 2.3313  | 0         | 0        |
| GO:0006310 | DNA recombination                                | 233  | 77                  | 0.60539  | 2.2731  | 0         | 0        |
| GO:0009112 | nucleobase metabolic process                     | 34   | 14                  | 0.7619   | 2.1489  | 0         | 0        |
| GO:0033108 | mitochondrial respiratory chain complex assembly | 68   | 36                  | 0.68415  | 2.1399  | 0         | 0        |
| GO:0150076 | neuroinflammatory response                       | 48   | 21                  | -0.57991 | -1.6325 | 0.0031646 | 0.029177 |
| GO:0061512 | protein localization to cilium                   | 43   | 17                  | -0.5943  | -1.6577 | 0.0063694 | 0.030139 |
| GO:0031589 | cell-substrate adhesion                          | 316  | 98                  | -0.479   | -1.6975 | 0         | 0.027081 |
| GO:0003007 | heart morphogenesis                              | 244  | 68                  | -0.50052 | -1.7366 | 0         | 0.02549  |
| GO:0010959 | regulation of metal ion transport                | 337  | 128                 | -0.50996 | -1.8346 | 0         | 0.013466 |

ES: Enrichment score; NES: Normalized enrichment score; FDR: false discovery rate.

**Table S6. KEGG annotation of *GNPNAT1* co-expressed genes.**

| Gene set | Description                                 | Size | Leading edge number | ES       | NES     | P-value  | FDR      |
|----------|---------------------------------------------|------|---------------------|----------|---------|----------|----------|
| hsa04110 | Cell cycle                                  | 118  | 55                  | 0.76543  | 2.6389  | 0        | 0        |
| hsa03010 | Ribosome                                    | 131  | 89                  | 0.74412  | 2.6123  | 0        | 0        |
| hsa03050 | Proteasome                                  | 44   | 32                  | 0.86007  | 2.5697  | 0        | 0        |
| hsa03013 | RNA transport                               | 158  | 69                  | 0.67655  | 2.4154  | 0        | 0        |
| hsa03008 | Ribosome biogenesis in eukaryotes           | 70   | 39                  | 0.74878  | 2.4056  | 0        | 0        |
| hsa03040 | Spliceosome                                 | 115  | 58                  | 0.68504  | 2.3566  | 0        | 0        |
| hsa00970 | Aminoacyl-tRNA biosynthesis                 | 43   | 18                  | 0.77167  | 2.2124  | 0        | 0        |
| hsa00240 | Pyrimidine metabolism                       | 96   | 46                  | 0.65944  | 2.1756  | 0        | 0        |
| hsa03440 | Homologous recombination                    | 34   | 14                  | 0.75421  | 2.1113  | 0        | 0        |
| hsa00190 | Oxidative phosphorylation                   | 104  | 51                  | 0.57244  | 1.9409  | 0        | 0.000248 |
| hsa03060 | Protein export                              | 22   | 13                  | 0.77027  | 1.9233  | 0        | 0.000351 |
| hsa01200 | Carbon metabolism                           | 110  | 44                  | 0.55506  | 1.9035  | 0        | 0.000441 |
| hsa03022 | Basal transcription factors                 | 44   | 25                  | 0.6588   | 1.8791  | 0        | 0.001092 |
| hsa03420 | Nucleotide excision repair                  | 45   | 17                  | 0.61686  | 1.8175  | 0        | 0.002235 |
| hsa04115 | p53 signaling pathway                       | 69   | 15                  | 0.5676   | 1.8235  | 0        | 0.002245 |
| hsa04973 | Carbohydrate digestion and absorption       | 41   | 12                  | -0.6892  | -1.8584 | 0        | 0.002294 |
| hsa04141 | Protein processing in endoplasmic reticulum | 159  | 62                  | 0.50812  | 1.8241  | 0        | 0.002347 |
| hsa00270 | Cysteine and methionine metabolism          | 44   | 14                  | 0.62552  | 1.8072  | 0        | 0.002368 |
| hsa05320 | Autoimmune thyroid disease                  | 48   | 19                  | -0.61176 | -1.7008 | 0        | 0.010171 |
| hsa04658 | Th1 and Th2 cell differentiation            | 90   | 34                  | -0.55284 | -1.6925 | 0        | 0.010274 |
| hsa02010 | ABC transporters                            | 44   | 15                  | -0.60645 | -1.6961 | 0.003021 | 0.010288 |
| hsa04971 | Gastric acid secretion                      | 75   | 24                  | -0.55232 | -1.6554 | 0        | 0.013878 |

KEGG: Kyoto Encyclopedia of Genes and Genomes; ES: Enrichment score; NES: Normalized enrichment score; FDR: false discovery rate.

**Table S7. Kinases enrichment of *GNPNAT1* co-expressed genes.**

| Gene Set       | Description                                                  | Size | Leading Edge Number | ES       | NES     | P-value   | FDR        |
|----------------|--------------------------------------------------------------|------|---------------------|----------|---------|-----------|------------|
| Kinase_CDK1    | cyclin dependent kinase 1                                    | 258  | 84                  | 0.67047  | 2.5367  | 0         | 0          |
| Kinase_PLK1    | polo like kinase 1                                           | 90   | 30                  | 0.74433  | 2.4679  | 0         | 0          |
| Kinase_AURKB   | aurora kinase B                                              | 87   | 34                  | 0.6792   | 2.2754  | 0         | 0          |
| Kinase_CDK2    | cyclin dependent kinase 2                                    | 278  | 90                  | 0.57619  | 2.1616  | 0         | 0          |
| Kinase_ATM     | ATM serine/threonine kinase                                  | 123  | 38                  | 0.6072   | 2.0821  | 0         | 0          |
| Kinase_ATR     | ATR serine/threonine kinase                                  | 66   | 24                  | 0.65819  | 2.0789  | 0         | 0          |
| Kinase_CHEK1   | checkpoint kinase 1                                          | 130  | 40                  | 0.56538  | 1.9821  | 0         | 0.00066623 |
| Kinase_AURKA   | aurora kinase A                                              | 46   | 14                  | 0.68672  | 1.9916  | 0         | 0.00076141 |
| Kinase_PLK3    | polo like kinase 3                                           | 20   | 11                  | 0.77708  | 1.8952  | 0         | 0.0020727  |
| Kinase_CSNK2A1 | casein kinase 2 alpha 1                                      | 256  | 78                  | 0.49962  | 1.8711  | 0         | 0.0042639  |
| Kinase_TTK     | TTK protein kinase                                           | 12   | 8                   | 0.84184  | 1.8412  | 0         | 0.0067835  |
| Kinase_CHEK2   | checkpoint kinase 2                                          | 27   | 10                  | 0.70356  | 1.8163  | 0.0052356 | 0.0082169  |
| Kinase_SYK     | spleen associated tyrosine kinase                            | 35   | 19                  | -0.65904 | -1.778  | 0         | 0.010932   |
| Kinase_WEE1    | WEE1 G2 checkpoint kinase                                    | 5    | 5                   | 0.9652   | 1.7038  | 0         | 0.03769    |
| Kinase_PLK4    | polo like kinase 4                                           | 5    | 2                   | 0.90366  | 1.7081  | 0.0042735 | 0.038949   |
| Kinase_CDC7    | cell division cycle 7                                        | 4    | 3                   | 0.95485  | 1.6884  | 0         | 0.042994   |
| Kinase_STK3    | serine/threonine kinase 3                                    | 7    | 3                   | 0.83503  | 1.6498  | 0.02551   | 0.059961   |
| Kinase_RPS6KA4 | ribosomal protein S6 kinase A4                               | 19   | 13                  | 0.66566  | 1.6415  | 0.015544  | 0.063958   |
| Kinase_NEK1    | NIMA related kinase 1                                        | 4    | 3                   | 0.98045  | 1.6215  | 0         | 0.069555   |
| Kinase_BUB1    | BUB1 mitotic checkpoint<br>serine/threonine kinase           | 5    | 3                   | 0.94506  | 1.6154  | 0.0045045 | 0.070938   |
| Kinase	EIF2AK4 | eukaryotic translation initiation<br>factor 2 alpha kinase 4 | 4    | 2                   | 0.96894  | 1.6221  | 0         | 0.072514   |
| Kinase_STK38   | serine/threonine kinase 38                                   | 4    | 1                   | 0.95461  | 1.6063  | 0.0093897 | 0.072532   |
| Kinase	EIF2AK3 | eukaryotic translation initiation<br>factor 2 alpha kinase 3 | 3    | 1                   | 0.98673  | 1.5761  | 0         | 0.095015   |
| Kinase_HCK     | HCK proto-oncogene, Src family<br>tyrosine kinase            | 23   | 12                  | -0.68051 | -1.648  | 0.0034602 | 0.11712    |
| Kinase_NTRK2   | neurotrophic receptor tyrosine<br>kinase 2                   | 11   | 5                   | -0.70097 | -1.4497 | 0.045139  | 0.27533    |
| Kinase_SGK1    | serum/glucocorticoid regulated                               | 21   | 11                  | -0.60539 | -1.4341 | 0.045603  | 0.28713    |



|               |                                                                        |    |    |          |         |           |         |
|---------------|------------------------------------------------------------------------|----|----|----------|---------|-----------|---------|
|               | kinase 1                                                               |    |    |          |         |           |         |
| Kinase_ERBB4  | erb-b2 receptor tyrosine kinase 4                                      | 8  | 5  | -0.76061 | -1.4528 | 0.049822  | 0.28864 |
| Kinase_TGFBR1 | transforming growth factor beta receptor 1                             | 8  | 2  | -0.74807 | -1.4398 | 0.052632  | 0.28924 |
| Kinase_IGF1R  | insulin like growth factor 1 receptor                                  | 11 | 5  | -0.68588 | -1.4263 | 0.064516  | 0.29378 |
| Kinase_PIK3CD | phosphatidylinositol-4,5-bisphosphate 3-kinase catalytic subunit delta | 8  | 2  | -0.7832  | -1.4877 | 0.030405  | 0.29906 |
| Kinase_PIK3CA | phosphatidylinositol-4,5-bisphosphate 3-kinase catalytic subunit alpha | 10 | 2  | -0.73312 | -1.4549 | 0.03125   | 0.30708 |
| Kinase_NTRK1  | neurotrophic receptor tyrosine kinase 1                                | 12 | 5  | -0.6878  | -1.4632 | 0.056667  | 0.31061 |
| Kinase_FGFR2  | fibroblast growth factor receptor 2                                    | 3  | 1  | -0.94093 | -1.4131 | 0.013699  | 0.31242 |
| Kinase_MARK2  | microtubule affinity regulating kinase 2                               | 15 | 9  | -0.67924 | -1.4945 | 0.044828  | 0.31545 |
| Kinase_MAPK10 | mitogen-activated protein kinase 10                                    | 25 | 10 | -0.55941 | -1.4065 | 0.055738  | 0.31597 |
| Kinase_FYN    | FYN proto-oncogene, Src family tyrosine kinase                         | 66 | 27 | -0.48442 | -1.4709 | 0.0065359 | 0.32135 |
| Kinase_BTK    | Bruton tyrosine kinase                                                 | 9  | 6  | -0.77359 | -1.5312 | 0.023333  | 0.34942 |
| Kinase_FGR    | FGR proto-oncogene, Src family tyrosine kinase                         | 12 | 8  | -0.73717 | -1.5501 | 0.0096463 | 0.3571  |
| Kinase_PDGFRB | platelet derived growth factor receptor beta                           | 15 | 7  | -0.68585 | -1.4968 | 0.035587  | 0.361   |
| Kinase_IKBKB  | inhibitor of nuclear factor kappa B kinase subunit beta                | 28 | 12 | -0.58196 | -1.5098 | 0.026846  | 0.37448 |
| Kinase_FES    | FES proto-oncogene, tyrosine kinase                                    | 7  | 2  | -0.7306  | -1.3393 | 0.11888   | 0.38214 |
| Kinase_TEC    | tec protein tyrosine kinase                                            | 5  | 5  | -0.79491 | -1.3565 | 0.066225  | 0.38953 |
| Kinase_STK39  | serine/threonine kinase 39                                             | 8  | 3  | -0.69023 | -1.3394 | 0.11348   | 0.39684 |
| Kinase_PRKAA2 | protein kinase AMP-activated catalytic subunit alpha 2                 | 19 | 10 | -0.5789  | -1.3458 | 0.099379  | 0.40622 |
| Kinase_ULK1   | unc-51 like autophagy activating                                       | 13 | 4  | -0.61895 | -1.3406 | 0.13423   | 0.40871 |

kinase 1

---

ES: Enrichment score; NES: Normalized enrichment score; FDR: false discovery rate.

**Table S8. miRNA enrichment of *GNPNAT1* co-expressed genes.**

| Gene Set                           | Size | Leading Edge Number | ES       | NES     | P Value  | FDR      |
|------------------------------------|------|---------------------|----------|---------|----------|----------|
| GGGGCCC,MIR-296                    | 67   | 27                  | -0.53575 | -1.5696 | 0.003236 | 0.099967 |
| CCTGTGA,MIR-513                    | 118  | 47                  | -0.49612 | -1.579  | 0        | 0.11175  |
| AGCGCTT,MIR-518F,MIR-518E,MIR-518A | 16   | 7                   | -0.6863  | -1.5396 | 0.021277 | 0.12257  |
| GAGCCTG,MIR-484                    | 98   | 40                  | -0.52405 | -1.6427 | 0        | 0.13212  |
| CCCAGAG,MIR-326                    | 141  | 49                  | -0.48085 | -1.5866 | 0        | 0.13432  |
| ATGCTGG,MIR-338                    | 104  | 29                  | -0.47556 | -1.5142 | 0.008876 | 0.14281  |
| GGCCAGT,MIR-193A,MIR-193B          | 83   | 18                  | -0.46871 | -1.4438 | 0.019293 | 0.14694  |
| AGCTCCT,MIR-28                     | 83   | 26                  | -0.4777  | -1.4704 | 0.012539 | 0.14993  |
| GAGCTGG,MIR-337                    | 147  | 57                  | -0.44985 | -1.4901 | 0.002959 | 0.15046  |
| ACAGGGT,MIR-10A,MIR-10B            | 119  | 33                  | -0.44766 | -1.4478 | 0.015244 | 0.15099  |
| AGGGCAG,MIR-18A                    | 130  | 43                  | -0.43821 | -1.4333 | 0.003135 | 0.15235  |
| CTTTGCA,MIR-527                    | 222  | 63                  | -0.41297 | -1.4271 | 0        | 0.15362  |
| CTCTATG,MIR-368                    | 37   | 9                   | -0.53838 | -1.4211 | 0.02589  | 0.15377  |
| GCACCTT,MIR-18A,MIR-18B            | 112  | 39                  | -0.46746 | -1.4981 | 0        | 0.15469  |
| CAGCACT,MIR-512-3P                 | 143  | 51                  | -0.4443  | -1.4738 | 0        | 0.16008  |
| CCAGGGG,MIR-331                    | 83   | 28                  | -0.47059 | -1.4481 | 0.006452 | 0.1621   |
| AGCGCAG,MIR-191                    | 12   | 7                   | -0.68025 | -1.4095 | 0.063091 | 0.16341  |
| TCTCTCC,MIR-185                    | 114  | 39                  | -0.45045 | -1.4532 | 0.00304  | 0.16625  |
| CAGGGTC,MIR-504                    | 79   | 29                  | -0.52202 | -1.5925 | 0.009146 | 0.18386  |
| GTGCAA,MIR-507                     | 119  | 51                  | -0.43213 | -1.3813 | 0.011905 | 0.20731  |
| GTGCCAA,MIR-96                     | 284  | 112                 | -0.3795  | -1.3413 | 0.01061  | 0.25597  |
| TTTGAC,MIR-19A,MIR-19B             | 479  | 141                 | -0.36687 | -1.3419 | 0.002639 | 0.26548  |
| TACTTGA,MIR-26A,MIR-26B            | 285  | 69                  | 0.38921  | 1.4956  | 0        | 0.71897  |
| ATGCACG,MIR-517B                   | 15   | 5                   | 0.28921  | 0.66046 | 0.94059  | 0.98373  |
| GCTTGAA,MIR-498                    | 103  | 15                  | 0.26173  | 0.87707 | 0.81609  | 0.99454  |
| AAGGGAT,MIR-188                    | 70   | 9                   | 0.24721  | 0.7806  | 0.92857  | 0.99566  |
| GTAAACC,MIR-299-5P                 | 47   | 9                   | 0.22451  | 0.67417 | 0.97549  | 0.9979   |
| ATTCTTT,MIR-186                    | 252  | 61                  | 0.32798  | 1.2361  | 0.014085 | 1        |
| AGTCTTA,MIR-499                    | 68   | 20                  | 0.40477  | 1.2974  | 0.078652 | 1        |
| ATCATGA,MIR-433                    | 106  | 32                  | 0.36913  | 1.2244  | 0.10119  | 1        |
| CTACTAG,MIR-325                    | 16   | 2                   | 0.52349  | 1.2443  | 0.17     | 1        |

|                                                       |     |     |         |        |         |   |
|-------------------------------------------------------|-----|-----|---------|--------|---------|---|
| GACTGTT,MIR-212,MIR-132                               | 148 | 27  | 0.31388 | 1.1232 | 0.17647 | 1 |
| ATTACAT,MIR-380-3P                                    | 95  | 19  | 0.33349 | 1.1142 | 0.20879 | 1 |
| TTTTGAG,MIR-373                                       | 210 | 47  | 0.29139 | 1.0753 | 0.22656 | 1 |
| AGTCTAG,MIR-151                                       | 21  | 6   | 0.47234 | 1.1714 | 0.22749 | 1 |
| GAGACTG,MIR-452                                       | 91  | 23  | 0.34122 | 1.1031 | 0.24859 | 1 |
| GTTTGTT,MIR-495                                       | 236 | 40  | 0.28087 | 1.0457 | 0.26761 | 1 |
| AGTCAGC,MIR-345                                       | 55  | 7   | 0.35046 | 1.075  | 0.26961 | 1 |
| CTGTTAC,MIR-194                                       | 97  | 15  | 0.31593 | 1.0553 | 0.28962 | 1 |
| GGGATGC,MIR-324-5P                                    | 46  | 5   | 0.36286 | 1.075  | 0.30151 | 1 |
| CAGGTCC,MIR-492                                       | 59  | 11  | 0.33185 | 1.044  | 0.30769 | 1 |
| TATCTGG,MIR-488                                       | 56  | 12  | 0.34901 | 1.0577 | 0.32836 | 1 |
| TGTTTAC,MIR-30A-5P,MIR-30C,MIR-30D,MIR-30B,MIR-30E-5P | 545 | 108 | 0.25394 | 1.0193 | 0.34513 | 1 |

---

ES: Enrichment score; NES: Normalized enrichment score; FDR: false discovery rate.

**Table S9. Transcription factor enrichment of *GNPNAT1* co-expressed genes.**

| Gene Set                | Size | Leading Edge Number | ES       | NES     | P Value  | FDR      |
|-------------------------|------|---------------------|----------|---------|----------|----------|
| V\$E2F1_Q6              | 213  | 85                  | 0.58802  | 2.1908  | 0        | 0        |
| V\$E2F_Q6               | 211  | 81                  | 0.58691  | 2.1879  | 0        | 0        |
| V\$E2F_Q4               | 212  | 81                  | 0.58132  | 2.1486  | 0        | 0        |
| V\$E2F4DP1_01           | 220  | 82                  | 0.57572  | 2.147   | 0        | 0        |
| V\$E2F1DP1_01           | 218  | 82                  | 0.57679  | 2.1346  | 0        | 0        |
| V\$E2F1DP2_01           | 218  | 82                  | 0.57679  | 2.1346  | 0        | 0        |
| V\$E2F4DP2_01           | 218  | 82                  | 0.57679  | 2.1346  | 0        | 0        |
| V\$E2F_02               | 218  | 82                  | 0.57647  | 2.1316  | 0        | 0        |
| V\$ELK1_02              | 226  | 71                  | 0.56863  | 2.1061  | 0        | 0        |
| V\$E2F_Q4_01            | 215  | 77                  | 0.55898  | 2.0761  | 0        | 0        |
| SGCGSSAAA_V\$E2F1DP2_01 | 155  | 62                  | 0.58061  | 2.0718  | 0        | 0        |
| V\$E2F_Q3               | 204  | 63                  | 0.55659  | 2.0536  | 0        | 0        |
| V\$E2F1_Q3              | 225  | 75                  | 0.54693  | 2.0251  | 0        | 0        |
| V\$E2F_Q6_01            | 219  | 64                  | 0.53911  | 2.0245  | 0        | 0        |
| V\$E2F1DP1RB_01         | 210  | 61                  | 0.54487  | 2.0224  | 0        | 0        |
| V\$E2F_Q3_01            | 215  | 68                  | 0.53792  | 2.0191  | 0        | 0        |
| SCGGAAGY_V\$ELK1_02     | 1076 | 335                 | 0.47868  | 1.9809  | 0        | 0        |
| V\$E2F1_Q6_01           | 218  | 65                  | 0.52208  | 1.9579  | 0        | 0        |
| V\$E2F1_Q4_01           | 210  | 66                  | 0.52356  | 1.9547  | 0        | 0        |
| V\$GABP_B               | 242  | 82                  | 0.50985  | 1.9044  | 0        | 0        |
| KRCTCNMNNMANAGC_UNKNOWN | 63   | 36                  | 0.543    | 1.7574  | 0        | 0.000696 |
| TGTYNNNNNRGCARM_UNKNOWN | 81   | 36                  | -0.61058 | -1.8355 | 0        | 0.006511 |
| V\$PPARA_01             | 36   | 7                   | -0.6473  | -1.7538 | 0.003115 | 0.007054 |
| V\$GATA_Q6              | 185  | 54                  | -0.51439 | -1.761  | 0        | 0.007235 |
| V\$RP58_01              | 194  | 62                  | -0.499   | -1.708  | 0        | 0.008372 |
| V\$LMO2COM_02           | 231  | 70                  | -0.49473 | -1.7245 | 0        | 0.008682 |
| V\$DBP_Q6               | 227  | 55                  | -0.49461 | -1.7136 | 0        | 0.009043 |
| V\$MYOGENIN_Q6          | 235  | 69                  | -0.48486 | -1.6961 | 0        | 0.009496 |
| V\$MEF2_02              | 207  | 56                  | -0.51582 | -1.7669 | 0        | 0.010852 |
| V\$GATA3_01             | 227  | 69                  | -0.48082 | -1.6586 | 0        | 0.011069 |
| V\$LHX3_01              | 209  | 69                  | -0.49163 | -1.6742 | 0        | 0.011334 |

|                       |     |     |          |         |   |          |
|-----------------------|-----|-----|----------|---------|---|----------|
| GATAAGR_V\$GATA_C     | 277 | 75  | -0.46642 | -1.6531 | 0 | 0.011641 |
| V\$GATA1_04           | 233 | 65  | -0.46829 | -1.6351 | 0 | 0.015012 |
| V\$CHX10_01           | 208 | 72  | -0.46828 | -1.5957 | 0 | 0.016564 |
| V\$STAT5B_01          | 226 | 85  | -0.45942 | -1.5992 | 0 | 0.017243 |
| TGCCAAR_V\$NF1_Q6     | 660 | 221 | -0.42193 | -1.5823 | 0 | 0.017659 |
| V\$ELF1_Q6            | 220 | 87  | -0.4586  | -1.5891 | 0 | 0.017689 |
| GCANCTGNY_V\$MYOD_Q6  | 854 | 246 | -0.41636 | -1.5797 | 0 | 0.017835 |
| TGTTTGY_V\$HNF3_Q6    | 670 | 212 | -0.41815 | -1.5764 | 0 | 0.018087 |
| V\$GATA1_03           | 233 | 60  | -0.45754 | -1.5999 | 0 | 0.018129 |
| TGGNNNNNKCCAR_UNKNOWN | 387 | 127 | -0.43491 | -1.5737 | 0 | 0.018231 |

---

ES: Enrichment score; NES: Normalized enrichment score; FDR: false discovery rate.

**Table S10. Correlation of *GNPNAT1* with various immune signatures in TCGA-LUAD cohort.**

| Marker gene | Class     | None adjusted           |             | Tumor purity adjusted   |             |
|-------------|-----------|-------------------------|-------------|-------------------------|-------------|
|             |           | Correlation coefficient | P-value     | Correlation coefficient | P-value     |
| CCL1        | chemokine | 0.00726001              | 0.869449575 | 0.026240141             | 0.561074131 |
| CCL2        | chemokine | -0.010385082            | 0.814124382 | 0.00954098              | 0.832644447 |
| CCL3        | chemokine | 0.08135977              | 0.06504917  | 0.099139627             | 0.027729363 |
| CCL4        | chemokine | 0.118895541             | 0.006908972 | 0.143692075             | 0.001379056 |
| CCL5        | chemokine | -0.006329612            | 0.886057864 | 0.002025595             | 0.964217788 |
| CCL7        | chemokine | 0.229806297             | 1.34066E-07 | 0.244728004             | 3.71349E-08 |
| CCL8        | chemokine | 0.210411881             | 1.45414E-06 | 0.234422643             | 1.39915E-07 |
| CCL11       | chemokine | 0.142288335             | 0.001205068 | 0.162478444             | 0.000291715 |
| CCL13       | chemokine | -0.118175487            | 0.007258943 | -0.098556383            | 0.028663677 |
| CCL14       | chemokine | -0.350637739            | 2.41068E-16 | -0.364383658            | 6.31456E-17 |
| CCL15       | chemokine | -0.033324942            | 0.450467858 | -0.036831128            | 0.414508865 |
| CCL16       | chemokine | -0.295335243            | 7.9706E-12  | -0.299076519            | 1.2059E-11  |
| CCL17       | chemokine | -0.324823736            | 4.04763E-14 | -0.322871423            | 2.00552E-13 |
| CCL18       | chemokine | 0.001151238             | 0.979207669 | 0.013760089             | 0.760547108 |
| CCL19       | chemokine | -0.257321049            | 3.11497E-09 | -0.268727387            | 1.33228E-09 |
| CCL20       | chemokine | 0.198770888             | 5.48569E-06 | 0.202417602             | 5.89927E-06 |
| CCL21       | chemokine | 0.034893517             | 0.429424738 | 0.060456904             | 0.180186929 |
| CCL22       | chemokine | -0.151805229            | 0.000546851 | -0.136603105            | 0.002368592 |
| CCL23       | chemokine | -0.210853136            | 1.38068E-06 | -0.216373758            | 1.2368E-06  |
| CCL24       | chemokine | 0.119992733             | 0.006404714 | 0.136747                | 0.002343299 |
| CCL25       | chemokine | 0.068744928             | 0.119203957 | 0.06909134              | 0.125519058 |
| CCL26       | chemokine | 0.283871586             | 5.31326E-11 | 0.305921866             | 3.85338E-12 |
| CCL27       | chemokine | -0.070380743            | 0.110647187 | -0.078117715            | 0.083141814 |
| CCL28       | chemokine | -0.124816893            | 0.004557323 | -0.12687554             | 0.004782156 |
| CX3CL1      | chemokine | -0.234032114            | 7.74709E-08 | -0.215322073            | 1.39648E-06 |
| CXCL1       | chemokine | 0.054878662             | 0.213755123 | 0.058421457             | 0.195327028 |
| CXCL2       | chemokine | -0.09518732             | 0.030788063 | -0.094465995            | 0.036006669 |
| CXCL3       | chemokine | 0.063423511             | 0.150644576 | 0.063758311             | 0.157506085 |
| CXCL5       | chemokine | 0.22390853              | 2.83233E-07 | 0.233329045             | 1.60495E-07 |
| CXCL6       | chemokine | 0.067032322             | 0.128707584 | 0.08269717              | 0.066556432 |

|         |           |              |             |              |             |
|---------|-----------|--------------|-------------|--------------|-------------|
| CXCL9   | chemokine | 0.108025722  | 0.01417814  | 0.136052568  | 0.00246768  |
| CXCL10  | chemokine | 0.170026307  | 0.000105578 | 0.202906563  | 5.595E-06   |
| CXCL11  | chemokine | 0.11115271   | 0.011597741 | 0.142961375  | 0.001459783 |
| CXCL12  | chemokine | -0.104803372 | 0.017352947 | -0.106300582 | 0.018227825 |
| CXCL13  | chemokine | -0.049925633 | 0.25807815  | -0.0438504   | 0.331233278 |
| CXCL14  | chemokine | -0.208097062 | 1.90508E-06 | -0.204598539 | 4.65357E-06 |
| CXCL16  | chemokine | -0.239951185 | 3.53032E-08 | -0.24848784  | 2.25438E-08 |
| CXCL17  | chemokine | -0.298408407 | 4.72354E-12 | -0.30268508  | 6.63351E-12 |
| XCL1    | chemokine | 0.060958665  | 0.167188085 | 0.059455867  | 0.187520548 |
| XCL2    | chemokine | -0.002366917 | 0.957267043 | 0.005028703  | 0.911320885 |
| CCR1    | receptor  | 0.046578486  | 0.291407824 | 0.070124247  | 0.119952443 |
| CCR2    | receptor  | -0.126005908 | 0.004183227 | -0.10866265  | 0.01579021  |
| CCR3    | receptor  | -0.061571912 | 0.162950169 | -0.065222955 | 0.148163591 |
| CCR4    | receptor  | -0.165325115 | 0.000164119 | -0.15938535  | 0.000381325 |
| CCR5    | receptor  | -0.042019262 | 0.34126331  | -0.020718103 | 0.646307371 |
| CCR6    | receptor  | -0.292803364 | 1.22084E-11 | -0.310366219 | 1.80781E-12 |
| CCR7    | receptor  | -0.234376194 | 7.40532E-08 | -0.254513392 | 9.95942E-09 |
| CCR8    | receptor  | 0.024334179  | 0.58165415  | 0.051650028  | 0.252346001 |
| CCR9    | receptor  | -0.143919863 | 0.001055904 | -0.136089473 | 0.002460921 |
| CCR10   | receptor  | 0.055566207  | 0.208064074 | 0.048477536  | 0.282699296 |
| CXCR1   | receptor  | 0.005255914  | 0.905285921 | 0.021328476  | 0.636626583 |
| CXCR2   | receptor  | -0.123412987 | 0.005037755 | -0.108151298 | 0.016292214 |
| CXCR3   | receptor  | -0.05976949  | 0.175640467 | -0.049466377 | 0.272984733 |
| CXCR4   | receptor  | -0.116377952 | 0.008202789 | -0.126882409 | 0.004779861 |
| CXCR5   | receptor  | -0.173059991 | 7.8926E-05  | -0.18290316  | 4.40175E-05 |
| CXCR6   | receptor  | -0.012282814 | 0.780955099 | 0.000276221  | 0.995118937 |
| XCR1    | receptor  | -0.146952422 | 0.000822961 | -0.142056286 | 0.001565789 |
| CX3CR1  | receptor  | -0.348212224 | 3.98246E-16 | -0.344080593 | 3.78787E-15 |
| B2M     | MHC       | -0.056671804 | 0.19914373  | -0.031129613 | 0.490444406 |
| HLA-A   | MHC       | -0.104668387 | 0.017498539 | -0.111300147 | 0.013410492 |
| HLA-B   | MHC       | -0.130606423 | 0.002983253 | -0.125640271 | 0.005211473 |
| HLA-C   | MHC       | -0.116810679 | 0.007966078 | -0.11528808  | 0.010411324 |
| HLA-DMA | MHC       | -0.412114548 | 1.55898E-22 | -0.42592914  | 3.80215E-23 |



|          |                  |              |             |              |             |
|----------|------------------|--------------|-------------|--------------|-------------|
| HLA-DMB  | MHC              | -0.272775786 | 3.07419E-10 | -0.277879857 | 3.42206E-10 |
| HLA-DOA  | MHC              | -0.311670172 | 4.59523E-13 | -0.323608459 | 1.75608E-13 |
| HLA-DOB  | MHC              | -0.305610234 | 1.35236E-12 | -0.337938396 | 1.23419E-14 |
| HLA-DPA1 | MHC              | -0.322698168 | 6.04266E-14 | -0.332833127 | 3.22971E-14 |
| HLA-DPB1 | MHC              | -0.406600879 | 6.34826E-22 | -0.42746317  | 2.55772E-23 |
| HLA-DQA1 | MHC              | -0.255072648 | 4.3094E-09  | -0.269006083 | 1.27921E-09 |
| HLA-DQA2 | MHC              | -0.166544176 | 0.000146544 | -0.168321656 | 0.000173561 |
| HLA-DQB1 | MHC              | -0.316720154 | 1.83382E-13 | -0.329182705 | 6.35557E-14 |
| HLA-DRA  | MHC              | -0.313277459 | 3.43679E-13 | -0.328215756 | 7.59228E-14 |
| HLA-DRB1 | MHC              | -0.373626478 | 1.66056E-18 | -0.394736916 | 7.8592E-20  |
| HLA-E    | MHC              | -0.194520555 | 8.74078E-06 | -0.197130285 | 1.03738E-05 |
| HLA-F    | MHC              | -0.205298348 | 2.63017E-06 | -0.209536436 | 2.69427E-06 |
| HLA-G    | MHC              | -0.04930086  | 0.264090483 | -0.039689348 | 0.379208259 |
| TAP1     | MHC              | 0.173871586  | 7.29548E-05 | 0.200178651  | 7.5058E-06  |
| TAP2     | MHC              | 0.185187177  | 2.34746E-05 | 0.206324227  | 3.85026E-06 |
| TAPBP    | MHC              | -0.023477206 | 0.595029902 | -0.02848124  | 0.528100111 |
| CD160    | Immunoinhibitor  | -0.134322425 | 0.002252797 | -0.129137991 | 0.004077731 |
| CD96     | Immunoinhibitor  | -0.104191955 | 0.018020976 | -0.099478154 | 0.027199168 |
| CSF1R    | Immunoinhibitor  | -0.132456897 | 0.00259616  | -0.122263442 | 0.006567752 |
| IDO1     | Immunoinhibitor  | 0.018820465  | 0.670031894 | 0.030207154  | 0.503394812 |
| IL10     | Immunoinhibitor  | -0.048486718 | 0.272068667 | -0.029773772 | 0.509540652 |
| IL10RB   | Immunoinhibitor  | -0.016138636 | 0.714829421 | -0.010172175 | 0.821752567 |
| KIR2DL1  | Immunoinhibitor  | -0.006249376 | 0.887492582 | -0.010350957 | 0.818673629 |
| KIR2DL3  | Immunoinhibitor  | 0.073300603  | 0.096583122 | 0.081901626  | 0.069225006 |
| LAG3     | Immunoinhibitor  | 0.023124209  | 0.600579954 | 0.035102602  | 0.436766263 |
| LGALS9   | Immunoinhibitor  | -0.28253979  | 6.58678E-11 | -0.282669134 | 1.64655E-10 |
| TGFB1    | Immunoinhibitor  | -0.141645182 | 0.001269026 | -0.132281618 | 0.003254539 |
| TGFBR1   | Immunoinhibitor  | 0.231506362  | 1.07658E-07 | 0.243138268  | 4.57476E-08 |
| TIGIT    | Immunoinhibitor  | -0.00085192  | 0.984612826 | 0.021730387  | 0.630285567 |
| BTNL2    | Immunostimulator | -0.047216059 | 0.284846319 | -0.042875153 | 0.342110617 |
| CD27     | Immunostimulator | -0.149323133 | 0.00067503  | -0.158832393 | 0.000399828 |
| CD28     | Immunostimulator | -0.107557417 | 0.014605216 | -0.096985809 | 0.031315074 |
| CD40     | Immunostimulator | -0.15948441  | 0.000279313 | -0.156506711 | 0.000487181 |

|           |                      |              |             |              |             |
|-----------|----------------------|--------------|-------------|--------------|-------------|
| CD40LG    | Immunostimulator     | -0.290524358 | 1.78556E-11 | -0.304475474 | 4.91607E-12 |
| CD48      | Immunostimulator     | -0.203917499 | 3.07882E-06 | -0.214222934 | 1.5844E-06  |
| CD70      | Immunostimulator     | 0.00271091   | 0.951063775 | 0.020035481  | 0.657205151 |
| CXCL12    | Immunostimulator     | -0.104803372 | 0.017352947 | -0.106300582 | 0.018227825 |
| CXCR4     | Immunostimulator     | -0.116377952 | 0.008202789 | -0.126882409 | 0.004779861 |
| ICOS      | Immunostimulator     | -0.057842547 | 0.190005066 | -0.046130139 | 0.306686479 |
| IL6       | Immunostimulator     | 0.211213641  | 1.32332E-06 | 0.212190585  | 1.99753E-06 |
| IL6R      | Immunostimulator     | -0.170211328 | 0.000103735 | -0.16877885  | 0.000166529 |
| LTA       | Immunostimulator     | -0.128307552 | 0.003536979 | -0.126828771 | 0.004797811 |
| MICB      | Immunostimulator     | 0.131802423  | 0.0027275   | 0.145087022  | 0.001236233 |
| RAET1E    | Immunostimulator     | 0.197819552  | 6.0939E-06  | 0.206883316  | 3.61974E-06 |
| TMIGD2    | Immunostimulator     | -0.041161112 | 0.351223025 | -0.045053752 | 0.31812263  |
| ULBP1     | Immunostimulator     | -0.023284016 | 0.45538838  | -0.031559248 | 0.321942881 |
| ADRM1     | Activated CD8 T cell | 0.185338333  | 2.31108E-05 | 0.170378475  | 0.000143973 |
| AHSA1     | Activated CD8 T cell | 0.459213252  | 3.15644E-28 | 0.455829198  | 1.14998E-26 |
| C1GALT1C1 | Activated CD8 T cell | 0.211208765  | 1.32408E-06 | 0.231995882  | 1.89546E-07 |
| CCT6B     | Activated CD8 T cell | -0.310151836 | 6.03639E-13 | -0.302812113 | 6.49442E-12 |
| CD37      | Activated CD8 T cell | -0.306266584 | 1.20459E-12 | -0.34250078  | 5.14548E-15 |
| CD3D      | Activated CD8 T cell | -0.067648935 | 0.125220413 | -0.064485389 | 0.152814126 |
| CD3E      | Activated CD8 T cell | -0.113400541 | 0.010008738 | -0.118441174 | 0.008477977 |
| CD3G      | Activated CD8 T cell | 0.011751079  | 0.790211786 | 0.038171111  | 0.397724027 |
| CD69      | Activated CD8 T cell | -0.226452252 | 2.05649E-07 | -0.246576931 | 2.90826E-08 |
| CD8A      | Activated CD8 T cell | 0.049499497  | 0.262168594 | 0.06581037   | 0.14453753  |
| CETN3     | Activated CD8 T cell | -0.09067163  | 0.039695335 | -0.092941202 | 0.039126127 |
| CSE1L     | Activated CD8 T cell | 0.513339269  | 5.76963E-36 | 0.510044763  | 5.26621E-34 |
| GEMIN6    | Activated CD8 T cell | 0.30490375   | 1.53124E-12 | 0.304648254  | 4.77544E-12 |
| GNLY      | Activated CD8 T cell | 0.085496592  | 0.052493604 | 0.098735229  | 0.028374347 |
| GPT2      | Activated CD8 T cell | 0.247779409  | 1.20906E-08 | 0.234312349  | 1.41869E-07 |
| GZMA      | Activated CD8 T cell | 0.060100524  | 0.173256264 | 0.07955218   | 0.077621122 |
| GZMH      | Activated CD8 T cell | 0.012403394  | 0.778860244 | 0.022812473  | 0.613348779 |
| GZMK      | Activated CD8 T cell | -0.094990307 | 0.031137534 | -0.089499189 | 0.047016962 |
| IL2RB     | Activated CD8 T cell | 0.08831152   | 0.045160901 | 0.117980016  | 0.008739105 |
| LCK       | Activated CD8 T cell | -0.070965642 | 0.107707771 | -0.062814737 | 0.163756356 |

|           |                            |              |             |              |             |
|-----------|----------------------------|--------------|-------------|--------------|-------------|
| MPZL1     | Activated CD8 T cell       | 0.210065473  | 1.51441E-06 | 0.231565983  | 1.99951E-07 |
| NKG7      | Activated CD8 T cell       | 0.038752195  | 0.380149963 | 0.053705871  | 0.233930068 |
| PIK3IP1   | Activated CD8 T cell       | -0.411361772 | 1.89133E-22 | -0.414205067 | 7.36456E-22 |
| PTRH2     | Activated CD8 T cell       | 0.363665176  | 1.50841E-17 | 0.358683705  | 2.0535E-16  |
| TIMM13    | Activated CD8 T cell       | 0.129903419  | 0.003143579 | 0.122315947  | 0.006544444 |
| ZAP70     | Activated CD8 T cell       | -0.206287842 | 2.3479E-06  | -0.226843288 | 3.57194E-07 |
| ACTN4     | Central memory CD8 T cell  | 0.122436494  | 0.005398356 | 0.123536168  | 0.006023254 |
| ADAM12    | Central memory CD8 T cell  | 0.330360349  | 1.40421E-14 | 0.360035835  | 1.55572E-16 |
| ADCY9     | Central memory CD8 T cell  | -0.241765242 | 2.76308E-08 | -0.238435492 | 8.40743E-08 |
| F13A1     | Central memory CD8 T cell  | -0.06178789  | 0.16147702  | -0.037147231 | 0.410512124 |
| FCER1G    | Central memory CD8 T cell  | -0.024607404 | 0.577419277 | -0.012481505 | 0.782208867 |
| FCGR3B    | Central memory CD8 T cell  | 0.137622661  | 0.001745243 | 0.154690361  | 0.000567409 |
| FGF7      | Central memory CD8 T cell  | -0.023430205 | 0.595767547 | -0.013167559 | 0.770563622 |
| FKBP4     | Central memory CD8 T cell  | 0.44842168   | 7.64734E-27 | 0.450483699  | 5.19688E-26 |
| GLUD1     | Central memory CD8 T cell  | 0.224032584  | 2.7887E-07  | 0.238756899  | 8.06816E-08 |
| GM2A      | Central memory CD8 T cell  | -0.016211379 | 0.713600438 | -0.008877311 | 0.844131316 |
| GUSB      | Central memory CD8 T cell  | -0.132711272 | 0.002546687 | -0.145226321 | 0.001222745 |
| IL1RN     | Central memory CD8 T cell  | 0.045207964  | 0.305852918 | 0.060401795  | 0.180585051 |
| NOL11     | Central memory CD8 T cell  | 0.450853872  | 3.76543E-27 | 0.443566958  | 3.51828E-25 |
| NTRK1     | Central memory CD8 T cell  | -0.204110157 | 3.0121E-06  | -0.215219655 | 1.41304E-06 |
| RARA      | Central memory CD8 T cell  | -0.144863755 | 0.000977582 | -0.154086424 | 0.000596693 |
| RNF128    | Central memory CD8 T cell  | -0.041278522 | 0.349849629 | -0.047089623 | 0.296724129 |
| SIGLEC1   | Central memory CD8 T cell  | -0.137209964 | 0.0018024   | -0.134923498 | 0.00268282  |
| TNFRSF11A | Central memory CD8 T cell  | 0.019366873  | 0.661040206 | 0.036622795  | 0.417155484 |
| TOX4      | Central memory CD8 T cell  | 0.259823129  | 2.16272E-09 | 0.259796997  | 4.78129E-09 |
| UBA52     | Central memory CD8 T cell  | -0.053604912 | 0.22459259  | -0.047186188 | 0.295733572 |
| ULBP1     | Central memory CD8 T cell  | -0.023284016 | 0.45538838  | -0.031559248 | 0.321942881 |
| ACAP1     | Effector memory CD8 T cell | -0.220814758 | 4.15931E-07 | -0.25102603  | 1.60211E-08 |
| APOL3     | Effector memory CD8 T cell | -0.063890806 | 0.147653537 | -0.043404049 | 0.336183645 |
| ARHGAP10  | Effector memory CD8 T cell | 0.05012941   | 0.256137784 | 0.056966837  | 0.206702841 |
| ATP10D    | Effector memory CD8 T cell | 0.021900492  | 0.619998083 | 0.041097006  | 0.362521983 |
| C3AR1     | Effector memory CD8 T cell | -0.023535542 | 0.594114965 | -0.004585353 | 0.919111135 |
| CCR5      | Effector memory CD8 T cell | -0.042019262 | 0.34126331  | -0.020718103 | 0.646307371 |

|          |                            |              |             |              |             |
|----------|----------------------------|--------------|-------------|--------------|-------------|
| CD160    | Effector memory CD8 T cell | -0.134322425 | 0.002252797 | -0.129137991 | 0.004077731 |
| CD55     | Effector memory CD8 T cell | -0.094219653 | 0.032537355 | -0.084515138 | 0.060774418 |
| CFLAR    | Effector memory CD8 T cell | -4.85832E-05 | 0.999122447 | 0.025534876  | 0.571652633 |
| CMKLR1   | Effector memory CD8 T cell | -0.030241828 | 0.493479412 | -0.014255076 | 0.752210011 |
| DAPP1    | Effector memory CD8 T cell | -0.048724142 | 0.26972522  | -0.032745756 | 0.468192762 |
| FCRL6    | Effector memory CD8 T cell | -0.218109599 | 5.79388E-07 | -0.22300804  | 5.66966E-07 |
| FLT3LG   | Effector memory CD8 T cell | -0.313307374 | 3.4182E-13  | -0.329930377 | 5.53681E-14 |
| GZMM     | Effector memory CD8 T cell | -0.132212446 | 0.002644526 | -0.14373754  | 0.001374172 |
| HAPLN3   | Effector memory CD8 T cell | 0.119046562  | 0.006837517 | 0.156787409  | 0.000475768 |
| HLA-DMB  | Effector memory CD8 T cell | -0.272775786 | 3.07419E-10 | -0.277879857 | 3.42206E-10 |
| HLA-DPA1 | Effector memory CD8 T cell | -0.322698168 | 6.04266E-14 | -0.332833127 | 3.22971E-14 |
| HLA-DPB1 | Effector memory CD8 T cell | -0.406600879 | 6.34826E-22 | -0.42746317  | 2.55772E-23 |
| IFI16    | Effector memory CD8 T cell | 0.035334193  | 0.423617011 | 0.060427965  | 0.180395908 |
| LIME1    | Effector memory CD8 T cell | -0.189950393 | 1.42639E-05 | -0.194487564 | 1.36786E-05 |
| LTK      | Effector memory CD8 T cell | 0.010036301  | 0.82025873  | 0.003217133  | 0.943198149 |
| NFKBIA   | Effector memory CD8 T cell | 0.004293202  | 0.922573948 | -0.007213461 | 0.873069874 |
| SETD7    | Effector memory CD8 T cell | 0.241597144  | 2.82677E-08 | 0.259995467  | 4.64981E-09 |
| SIK1     | Effector memory CD8 T cell | 0.060313354  | 0.171736187 | 0.039570827  | 0.380634378 |
| TRIB2    | Effector memory CD8 T cell | -0.052916137 | 0.230613391 | -0.037310871 | 0.408452094 |
| AIM2     | Activated CD4 T cell       | 0.102917895  | 0.01948552  | 0.129155261  | 0.004072736 |
| BIRC3    | Activated CD4 T cell       | 0.045633178  | 0.301321438 | 0.066680298  | 0.139292623 |
| BRIP1    | Activated CD4 T cell       | 0.460278349  | 2.2902E-28  | 0.462780774  | 1.55359E-27 |
| CCL20    | Activated CD4 T cell       | 0.198770888  | 5.48569E-06 | 0.202417602  | 5.89927E-06 |
| CCL4     | Activated CD4 T cell       | 0.118895541  | 0.006908972 | 0.143692075  | 0.001379056 |
| CCL5     | Activated CD4 T cell       | -0.006329612 | 0.886057864 | 0.002025595  | 0.964217788 |
| CCNB1    | Activated CD4 T cell       | 0.621200617  | 2.7366E-56  | 0.622066839  | 3.8745E-54  |
| CCR7     | Activated CD4 T cell       | -0.234376194 | 7.40532E-08 | -0.254513392 | 9.95942E-09 |
| DUSP2    | Activated CD4 T cell       | -0.109996594 | 0.012498866 | -0.118952547 | 0.008196567 |
| ESCO2    | Activated CD4 T cell       | 0.558429138  | 1.46115E-43 | 0.557986016  | 1.08773E-41 |
| ETS1     | Activated CD4 T cell       | 0.008235296  | 0.852101573 | 0.030931395  | 0.493212036 |
| EXO1     | Activated CD4 T cell       | 0.592980001  | 3.2024E-50  | 0.593980516  | 2.44704E-48 |
| EXOC6    | Activated CD4 T cell       | 0.285144346  | 4.32237E-11 | 0.2939331    | 2.7866E-11  |
| IARS     | Activated CD4 T cell       | 0.485040166  | 9.52592E-32 | 0.500537842  | 1.27396E-32 |

|         |                           |              |             |              |             |
|---------|---------------------------|--------------|-------------|--------------|-------------|
| ITK     | Activated CD4 T cell      | -0.11427183  | 0.009446827 | -0.117550163 | 0.008988934 |
| KIF11   | Activated CD4 T cell      | 0.569204147  | 1.48621E-45 | 0.569812156  | 8.75613E-44 |
| KNTC1   | Activated CD4 T cell      | 0.360134442  | 3.23758E-17 | 0.359080283  | 1.89318E-16 |
| NUF2    | Activated CD4 T cell      | 0.558814265  | 1.24373E-43 | 0.554592371  | 4.18895E-41 |
| PRC1    | Activated CD4 T cell      | 0.562126898  | 3.08385E-44 | 0.55662616   | 1.87058E-41 |
| PSAT1   | Activated CD4 T cell      | 0.432598781  | 6.6958E-25  | 0.425003199  | 4.82535E-23 |
| RGS1    | Activated CD4 T cell      | -0.112870164 | 0.010365144 | -0.121803353 | 0.006775194 |
| RTKN2   | Activated CD4 T cell      | 0.091858321  | 0.037165688 | 0.084789106  | 0.059940159 |
| SAMSN1  | Activated CD4 T cell      | -0.046929023 | 0.287787879 | -0.032771213 | 0.467846777 |
| SELL    | Activated CD4 T cell      | -0.135036329 | 0.002132765 | -0.126896273 | 0.004775231 |
| TRAT1   | Activated CD4 T cell      | -0.110013562 | 0.012485205 | -0.106070255 | 0.018482235 |
| ABHD3   | Central memory CD4 T cell | 0.202437731  | 3.64057E-06 | 0.202674082  | 5.73775E-06 |
| AHNAK   | Central memory CD4 T cell | -0.050264529 | 0.254856762 | -0.039505956 | 0.381416326 |
| ANXA2P2 | Central memory CD4 T cell | 0.124305715  | 0.004727243 | 0.14519131   | 0.001226123 |
| AQP3    | Central memory CD4 T cell | -0.250915537 | 7.78956E-09 | -0.251355733 | 1.53216E-08 |
| ATHL1   | Central memory CD4 T cell | -0.113645343 | 0.009847936 | -0.121309807 | 0.00700423  |
| BMI1    | Central memory CD4 T cell | 0.169496109  | 0.000111029 | 0.18131552   | 5.13822E-05 |
| BZW2    | Central memory CD4 T cell | 0.447444734  | 1.01486E-26 | 0.447571152  | 1.16899E-25 |
| CD63    | Central memory CD4 T cell | -0.150980021 | 0.000586716 | -0.149867254 | 0.000843787 |
| COL4A1  | Central memory CD4 T cell | 0.196340756  | 7.16872E-06 | 0.20210429   | 6.10247E-06 |
| CYLD    | Central memory CD4 T cell | -0.046820569 | 0.288904617 | -0.025960838 | 0.565252183 |
| ELMO2   | Central memory CD4 T cell | 0.008554777  | 0.846433823 | 0.00690497   | 0.878455178 |
| FYN     | Central memory CD4 T cell | -0.115879647 | 0.008483131 | -0.110124157 | 0.014429446 |
| GLIPR1  | Central memory CD4 T cell | 0.006575032  | 0.881671785 | 0.028312288  | 0.530551224 |
| GSS     | Central memory CD4 T cell | 0.243284022  | 2.24718E-08 | 0.234936718  | 1.31144E-07 |
| IFITM2  | Central memory CD4 T cell | -0.113125072 | 0.010192467 | -0.102703475 | 0.02257022  |
| ITGB1   | Central memory CD4 T cell | 0.425660122  | 4.42406E-24 | 0.431312434  | 9.37391E-24 |
| ITGB2   | Central memory CD4 T cell | -0.179725777 | 4.09301E-05 | -0.174952537 | 9.4275E-05  |
| KLF5    | Central memory CD4 T cell | 0.065715578  | 0.136405699 | 0.059856239  | 0.184561484 |
| LSP1    | Central memory CD4 T cell | -0.224205349 | 2.72902E-07 | -0.240934634 | 6.09389E-08 |
| NDUFB9  | Central memory CD4 T cell | 0.228608149  | 1.56323E-07 | 0.22274969   | 5.84717E-07 |
| PKM2    | Central memory CD4 T cell | 0.247773573  | 1.21004E-08 | 0.248241086  | 2.33002E-08 |
| SFXN3   | Central memory CD4 T cell | -0.077549764 | 0.078703878 | -0.058623376 | 0.193784818 |

|          |                             |              |             |              |             |
|----------|-----------------------------|--------------|-------------|--------------|-------------|
| SIRPG    | Central memory CD4 T cell   | -0.001232635 | 0.977737945 | 0.018815643  | 0.676860202 |
| SMAD4    | Central memory CD4 T cell   | 0.137040494  | 0.001826364 | 0.141467325  | 0.001638518 |
| STX4     | Central memory CD4 T cell   | -0.081946678 | 0.06313017  | -0.082344626 | 0.067728397 |
| TRADD    | Central memory CD4 T cell   | -0.230466518 | 1.23143E-07 | -0.233630998 | 1.54538E-07 |
| VIM      | Central memory CD4 T cell   | -0.146186176 | 0.000876848 | -0.143134763 | 0.001440244 |
| XRCC6    | Central memory CD4 T cell   | 0.2627806    | 1.39811E-09 | 0.266561845  | 1.82415E-09 |
| ATM      | Effector memeory CD4 T cell | -0.018623057 | 0.673292148 | -0.013225941 | 0.769574961 |
| CASP3    | Effector memeory CD4 T cell | 0.290347501  | 1.83876E-11 | 0.29487158   | 2.39465E-11 |
| CASQ1    | Effector memeory CD4 T cell | -0.322641759 | 6.107E-14   | -0.330795631 | 4.7178E-14  |
| CD300E   | Effector memeory CD4 T cell | 0.105207615  | 0.016923258 | 0.115905695  | 0.010004394 |
| DARS     | Effector memeory CD4 T cell | 0.448763739  | 6.92446E-27 | 0.460231897  | 3.25397E-27 |
| DOCK9    | Effector memeory CD4 T cell | -0.110998831 | 0.011714266 | -0.09836667  | 0.028973353 |
| EXOSC9   | Effector memeory CD4 T cell | 0.249108639  | 1.00424E-08 | 0.251253471  | 1.55353E-08 |
| EZH2     | Effector memeory CD4 T cell | 0.42127108   | 1.42823E-23 | 0.414807394  | 6.34229E-22 |
| GDE1     | Effector memeory CD4 T cell | -0.13961624  | 0.001491832 | -0.147627427 | 0.001010558 |
| IL34     | Effector memeory CD4 T cell | -0.352515713 | 1.62945E-16 | -0.373356669 | 9.39938E-18 |
| NCOA4    | Effector memeory CD4 T cell | 0.122236362  | 0.005475069 | 0.133366698  | 0.003007515 |
| NEFL     | Effector memeory CD4 T cell | -0.137128759 | 0.001813847 | -0.128682875 | 0.00421139  |
| PDGFRL   | Effector memeory CD4 T cell | 0.094917127  | 0.031268207 | 0.09971293   | 0.026836608 |
| PTGS1    | Effector memeory CD4 T cell | -0.097823247 | 0.026425896 | -0.086367055 | 0.055317503 |
| REPS1    | Effector memeory CD4 T cell | 0.296085512  | 7.01888E-12 | 0.290952312  | 4.49343E-11 |
| SCG2     | Effector memeory CD4 T cell | 0.085293386  | 0.053059309 | 0.091615427  | 0.042021548 |
| SDPR     | Effector memeory CD4 T cell | -0.341958093 | 1.42437E-15 | -0.335892901 | 1.81846E-14 |
| SIGLEC14 | Effector memeory CD4 T cell | -0.045539875 | 0.302311932 | -0.035481993 | 0.431823099 |
| SIGLEC6  | Effector memeory CD4 T cell | -0.193322739 | 9.94902E-06 | -0.18546341  | 3.4204E-05  |
| TAL1     | Effector memeory CD4 T cell | -0.232224612 | 9.80786E-08 | -0.231550886 | 2.00326E-07 |
| TFEC     | Effector memeory CD4 T cell | -0.07499941  | 0.089080705 | -0.06313352  | 0.161624211 |
| TIPIN    | Effector memeory CD4 T cell | 0.403794332  | 1.28448E-21 | 0.399141559  | 2.80624E-20 |
| TPK1     | Effector memeory CD4 T cell | -0.198273894 | 5.79581E-06 | -0.190941562 | 1.97092E-05 |
| UQCRB    | Effector memeory CD4 T cell | 0.172261846  | 8.52452E-05 | 0.174186376  | 0.00010128  |
| USP9Y    | Effector memeory CD4 T cell | 0.089892228  | 0.041434844 | 0.085306777  | 0.058389641 |
| WIPF1    | Effector memeory CD4 T cell | 0.001405399  | 0.974618703 | 0.021601826  | 0.632310977 |
| ZCRB1    | Effector memeory CD4 T cell | 0.274339291  | 2.41194E-10 | 0.271796078  | 8.4942E-10  |

|          |                          |              |             |              |             |
|----------|--------------------------|--------------|-------------|--------------|-------------|
| B3GAT1   | T follicular helper cell | -0.31931883  | 1.13525E-13 | -0.309452885 | 2.11423E-12 |
| CDK5R1   | T follicular helper cell | 0.291901857  | 1.41955E-11 | 0.29811958   | 1.41104E-11 |
| PDCD1    | T follicular helper cell | 0.001973946  | 0.964356667 | 0.012209177  | 0.786845118 |
| BCL6     | T follicular helper cell | -0.143155347 | 0.001123542 | -0.141548788 | 0.001628277 |
| CD200    | T follicular helper cell | 0.055884194  | 0.205469353 | 0.07694824   | 0.087873669 |
| CD83     | T follicular helper cell | -0.295600545 | 7.62047E-12 | -0.302507651 | 6.83267E-12 |
| CD84     | T follicular helper cell | -0.038596034 | 0.382074246 | -0.019300518 | 0.669020258 |
| FGF2     | T follicular helper cell | -0.096426631 | 0.028665807 | -0.088389501 | 0.049829588 |
| GPR18    | T follicular helper cell | -0.124586587 | 0.004633184 | -0.117369887 | 0.009095589 |
| CEBPA    | T follicular helper cell | -0.377753592 | 6.50717E-19 | -0.380292599 | 2.06894E-18 |
| CECR1    | T follicular helper cell | -0.173164801 | 7.81298E-05 | -0.177511568 | 7.40427E-05 |
| CLEC10A  | T follicular helper cell | -0.264222459 | 1.12803E-09 | -0.276982574 | 3.91863E-10 |
| CLEC4A   | T follicular helper cell | -0.153419498 | 0.00047604  | -0.143634496 | 0.001385265 |
| CSF1R    | T follicular helper cell | -0.132456897 | 0.00259616  | -0.122263442 | 0.006567752 |
| CTSS     | T follicular helper cell | -0.084149661 | 0.056338837 | -0.071172408 | 0.114502581 |
| DPP4     | T follicular helper cell | -0.158586847 | 0.000302613 | -0.138602014 | 0.002038586 |
| LRRC32   | T follicular helper cell | -0.00593629  | 0.893094425 | 0.003077624  | 0.945657442 |
| MC5R     | T follicular helper cell | -0.249645603 | 9.3141E-09  | -0.243279166 | 4.49123E-08 |
| MICA     | T follicular helper cell | -0.075912522 | 0.08524588  | -0.077237195 | 0.086684836 |
| NCAM1    | T follicular helper cell | -0.155904977 | 0.000383497 | -0.162570411 | 0.00028938  |
| NCR2     | T follicular helper cell | 0.058347427  | 0.186160541 | 0.055747779  | 0.216599655 |
| NRP1     | T follicular helper cell | 0.071022788  | 0.107423922 | 0.084770265  | 0.059997227 |
| PDCD1LG2 | T follicular helper cell | 0.067111092  | 0.128257962 | 0.098415218  | 0.028893834 |
| PDCD6    | T follicular helper cell | 0.159864199  | 0.000269968 | 0.149950664  | 0.000838098 |
| PRDX1    | T follicular helper cell | 0.21188568   | 1.22244E-06 | 0.203192835  | 5.42387E-06 |
| RAE1     | T follicular helper cell | 0.389248049  | 4.45859E-20 | 0.379016136  | 2.74101E-18 |
| RAET1E   | T follicular helper cell | 0.197819552  | 6.0939E-06  | 0.206883316  | 3.61974E-06 |
| SIGLEC7  | T follicular helper cell | -0.018550797 | 0.67448708  | -0.002184029 | 0.961421159 |
| SIGLEC9  | T follicular helper cell | -0.067877048 | 0.123949122 | -0.056980314 | 0.206595284 |
| TYRO3    | T follicular helper cell | 0.163288485  | 0.000197958 | 0.183489463  | 4.15594E-05 |
| CHST12   | T follicular helper cell | -0.070440405 | 0.110344497 | -0.089289071 | 0.047539068 |
| CLIC3    | T follicular helper cell | -0.318557437 | 1.30714E-13 | -0.333486958 | 2.85819E-14 |
| IVNS1ABP | T follicular helper cell | 0.131051272  | 0.002885682 | 0.137634751  | 0.002192631 |

|         |                          |              |             |              |             |
|---------|--------------------------|--------------|-------------|--------------|-------------|
| LGMN    | T follicular helper cell | -0.016305207 | 0.712016324 | -0.008339228 | 0.853468978 |
| ACP5    | Gamma delta T cell       | -0.220518866 | 4.31376E-07 | -0.234189124 | 1.44083E-07 |
| AQP9    | Gamma delta T cell       | 0.155373194  | 0.00040176  | 0.171695219  | 0.000127592 |
| BTN3A2  | Gamma delta T cell       | -0.077441309 | 0.079124257 | -0.08087167  | 0.072809378 |
| C1orf54 | Gamma delta T cell       | -0.143843024 | 0.001062529 | -0.152111496 | 0.000702534 |
| CARD8   | Gamma delta T cell       | -0.186658291 | 2.01536E-05 | -0.195663679 | 1.21001E-05 |
| CCL18   | Gamma delta T cell       | 0.001151238  | 0.979207669 | 0.013760089  | 0.760547108 |
| CD209   | Gamma delta T cell       | 0.118091279  | 0.00730089  | 0.141054555  | 0.001691322 |
| CD33    | Gamma delta T cell       | -0.22657762  | 2.02411E-07 | -0.223426426 | 5.39312E-07 |
| CD36    | Gamma delta T cell       | -0.15182574  | 0.000545893 | -0.148676077 | 0.000929016 |
| CDK5    | Gamma delta T cell       | 0.127382887  | 0.003784856 | 0.119792993  | 0.007752139 |
| IL10RB  | Gamma delta T cell       | -0.016138636 | 0.714829421 | -0.010172175 | 0.821752567 |
| KLRF1   | Gamma delta T cell       | -0.07416063  | 0.092724322 | -0.083924687 | 0.062605037 |
| LGALS1  | Gamma delta T cell       | 0.075819437  | 0.085630614 | 0.086289963  | 0.055536255 |
| MAPK7   | Gamma delta T cell       | -0.014955946 | 0.734912097 | -0.02758725  | 0.541134851 |
| KLHL7   | Gamma delta T cell       | 0.286120667  | 3.68682E-11 | 0.290264967  | 5.01284E-11 |
| KRT80   | Gamma delta T cell       | 0.31172877   | 4.54696E-13 | 0.311414268  | 1.50949E-12 |
| LAMC1   | Gamma delta T cell       | 0.330740405  | 1.30475E-14 | 0.336572157  | 1.59936E-14 |
| LCORL   | Gamma delta T cell       | 0.142507164  | 0.001183992 | 0.152628759  | 0.000673247 |
| LMNB1   | Gamma delta T cell       | 0.498912291  | 9.13302E-34 | 0.495766432  | 6.07285E-32 |
| MEIS3P1 | Gamma delta T cell       | -0.065244547 | 0.139243941 | -0.07596971  | 0.091997236 |
| MPL     | Gamma delta T cell       | -0.166118919 | 0.000152464 | -0.164691692 | 0.00024012  |
| FABP1   | Gamma delta T cell       | -0.033936407 | 0.442196345 | -0.022466984 | 0.618734632 |
| FABP5   | Gamma delta T cell       | 0.010234105  | 0.816778395 | 0.013601752  | 0.763219891 |
| FADD    | Gamma delta T cell       | 0.381637667  | 2.66161E-19 | 0.391663727  | 1.59766E-19 |
| MFAP3L  | Gamma delta T cell       | 0.064109827  | 0.146267309 | 0.06638294   | 0.141068747 |
| MINPP1  | Gamma delta T cell       | 0.34564891   | 6.73755E-16 | 0.359245387  | 1.83013E-16 |
| RPS24   | Gamma delta T cell       | 0.058295654  | 0.186552121 | 0.058288805  | 0.19634506  |
| RPS7    | Gamma delta T cell       | 0.168759194  | 0.000119046 | 0.167226406  | 0.000191556 |
| RPS9    | Gamma delta T cell       | -0.205474978 | 2.57751E-06 | -0.203317731 | 5.35078E-06 |
| DBNL    | Gamma delta T cell       | -0.036546776 | 0.407874663 | -0.029592276 | 0.512126055 |
| CCL13   | Gamma delta T cell       | -0.118175487 | 0.007258943 | -0.098556383 | 0.028663677 |
| CD70    | Type 1 T helper cell     | 0.00271091   | 0.951063775 | 0.020035481  | 0.657205151 |



|          |                      |              |             |              |             |
|----------|----------------------|--------------|-------------|--------------|-------------|
| TBX21    | Type 1 T helper cell | -0.076596593 | 0.082461072 | -0.073392801 | 0.103600467 |
| ADAM8    | Type 1 T helper cell | -0.088332912 | 0.045108654 | -0.087352175 | 0.052584678 |
| AHCYL2   | Type 1 T helper cell | -0.09007387  | 0.041023797 | -0.091372147 | 0.042572025 |
| ALCAM    | Type 1 T helper cell | -0.060399842 | 0.171121322 | -0.078201387 | 0.082811309 |
| B3GALNT1 | Type 1 T helper cell | 0.190122455  | 1.40063E-05 | 0.199228595  | 8.30672E-06 |
| BBS12    | Type 1 T helper cell | 0.037696894  | 0.393269347 | 0.049906005  | 0.268739702 |
| BST1     | Type 1 T helper cell | -0.032561437 | 0.460917688 | -0.0103281   | 0.8190671   |
| CD151    | Type 1 T helper cell | -0.120287281 | 0.006275088 | -0.12615066  | 0.005030047 |
| CD47     | Type 1 T helper cell | -0.156294167 | 0.000370625 | -0.160713077 | 0.000340106 |
| CD48     | Type 1 T helper cell | -0.203917499 | 3.07882E-06 | -0.214222934 | 1.5844E-06  |
| CD52     | Type 1 T helper cell | -0.316601281 | 1.87428E-13 | -0.346119085 | 2.54461E-15 |
| CD53     | Type 1 T helper cell | -0.10160092  | 0.021107313 | -0.092904717 | 0.039203487 |
| CD59     | Type 1 T helper cell | -0.2287557   | 1.53401E-07 | -0.208250014 | 3.11047E-06 |
| CD6      | Type 1 T helper cell | -0.136903793 | 0.001845907 | -0.140814644 | 0.001722726 |
| CD68     | Type 1 T helper cell | -0.011963597 | 0.786508551 | 0.000563654  | 0.990039956 |
| CD7      | Type 1 T helper cell | 0.034204611  | 0.438595764 | 0.046876495  | 0.298918183 |
| CD96     | Type 1 T helper cell | -0.104191955 | 0.018020976 | -0.099478154 | 0.027199168 |
| CFHR3    | Type 1 T helper cell | 0.111489107  | 0.011346569 | 0.102085262  | 0.023400504 |
| CHRM3    | Type 1 T helper cell | 0.016248576  | 0.712972287 | 0.016013538  | 0.72283052  |
| CLEC7A   | Type 1 T helper cell | -0.107087442 | 0.015045142 | -0.101602153 | 0.024067611 |
| COL23A1  | Type 1 T helper cell | -0.15752175  | 0.000332614 | -0.155726056 | 0.000520275 |
| COL4A4   | Type 1 T helper cell | -0.272957254 | 2.98907E-10 | -0.27445112  | 5.72809E-10 |
| COL5A3   | Type 1 T helper cell | 0.167551418  | 0.000133373 | 0.175881667  | 8.63921E-05 |
| DAB1     | Type 1 T helper cell | -0.007684187 | 0.861896277 | -0.000437375 | 0.992271298 |
| DLEU7    | Type 1 T helper cell | 0.120602817  | 0.006138843 | 0.118378968  | 0.00851279  |
| DOC2B    | Type 1 T helper cell | 0.102641848  | 0.019816168 | 0.108125305  | 0.016318101 |
| EMP1     | Type 1 T helper cell | -0.021147628 | 0.632078467 | 0.001906275  | 0.966324294 |
| F12      | Type 1 T helper cell | 0.321081568  | 8.1784E-14  | 0.327150116  | 9.22897E-14 |
| FURIN    | Type 1 T helper cell | 0.202425476  | 3.64561E-06 | 0.198087144  | 9.37682E-06 |
| GAB3     | Type 1 T helper cell | -0.298129684 | 4.95436E-12 | -0.3224831   | 2.15058E-13 |
| GATM     | Type 1 T helper cell | -0.076378717 | 0.083339936 | -0.067579559 | 0.134025688 |
| GFPT2    | Type 1 T helper cell | 0.233728896  | 8.06085E-08 | 0.274003873  | 6.12299E-10 |
| GPR25    | Type 1 T helper cell | -0.125868796 | 0.004224902 | -0.124570036 | 0.005611171 |

|          |                      |              |             |              |             |
|----------|----------------------|--------------|-------------|--------------|-------------|
| GREM2    | Type 1 T helper cell | -0.150287961 | 0.000622212 | -0.138031406 | 0.002128218 |
| HAVCR1   | Type 1 T helper cell | 0.165547174  | 0.000160777 | 0.172152982  | 0.00012232  |
| HSD11B1  | Type 1 T helper cell | 0.050670239  | 0.25103709  | 0.07547957   | 0.094120205 |
| HUNK     | Type 1 T helper cell | -0.085822179 | 0.051597691 | -0.089216364 | 0.047720859 |
| IGF2     | Type 1 T helper cell | -0.074864377 | 0.08965939  | -0.074818673 | 0.097044576 |
| RCSD1    | Type 1 T helper cell | -0.180430585 | 3.81311E-05 | -0.190035893 | 2.16133E-05 |
| RYR1     | Type 1 T helper cell | -0.184253289 | 2.58455E-05 | -0.182900536 | 4.40288E-05 |
| SAV1     | Type 1 T helper cell | 0.342096544  | 1.38518E-15 | 0.348746847  | 1.51716E-15 |
| SELE     | Type 1 T helper cell | -0.047104469 | 0.285987476 | -0.033797558 | 0.454016005 |
| SELP     | Type 1 T helper cell | -0.233008835 | 8.85591E-08 | -0.224345364 | 4.83052E-07 |
| SH3KBP1  | Type 1 T helper cell | 0.104321889  | 0.017877162 | 0.123876028  | 0.005884886 |
| SIT1     | Type 1 T helper cell | -0.128873768 | 0.003392559 | -0.138079277 | 0.002120562 |
| SLC35B3  | Type 1 T helper cell | 0.171233157  | 9.40943E-05 | 0.175779356  | 8.72287E-05 |
| SIGLEC10 | Type 1 T helper cell | 0.038241455  | 0.386465605 | 0.050424823  | 0.263788432 |
| SKAP1    | Type 1 T helper cell | -0.053127074 | 0.228757492 | -0.049049939 | 0.277047792 |
| THUMPD2  | Type 1 T helper cell | 0.181846043  | 3.3048E-05  | 0.173966801  | 0.000103376 |
| TIGIT    | Type 1 T helper cell | -0.00085192  | 0.984612826 | 0.021730387  | 0.630285567 |
| ZEB2     | Type 1 T helper cell | -0.086465621 | 0.049864639 | -0.076022951 | 0.09176896  |
| ENC1     | Type 1 T helper cell | -0.07618557  | 0.08412536  | -0.067191224 | 0.136280996 |
| FAM134B  | Type 1 T helper cell | -0.144353411 | 0.001019237 | -0.14761443  | 0.001011609 |
| FBXO30   | Type 1 T helper cell | 0.377379359  | 7.08803E-19 | 0.384178344  | 8.72044E-19 |
| FCGR2C   | Type 1 T helper cell | -0.039345033 | 0.372898946 | -0.026560457 | 0.556301    |
| STAC     | Type 1 T helper cell | -0.141385442 | 0.001295731 | -0.132706421 | 0.003155714 |
| LTC4S    | Type 1 T helper cell | -0.466885019 | 3.05236E-29 | -0.477501592 | 1.91975E-29 |
| MAN1B1   | Type 1 T helper cell | 0.040032534  | 0.364597876 | 0.041386788  | 0.359144699 |
| MDH1     | Type 1 T helper cell | 0.299698769  | 3.78487E-12 | 0.309323351  | 2.16161E-12 |
| MMD      | Type 1 T helper cell | 0.337370522  | 3.56245E-15 | 0.349934396  | 1.19906E-15 |
| RGS16    | Type 1 T helper cell | -0.08552756  | 0.052407834 | -0.093041833 | 0.038913424 |
| IL12A    | Type 1 T helper cell | -0.018406146 | 0.676881573 | -0.030401309 | 0.500654198 |
| P2RX5    | Type 1 T helper cell | 0.081366754  | 0.065026054 | 0.098117773  | 0.029383987 |
| CD97     | Type 1 T helper cell | -0.225527282 | 2.31135E-07 | -0.217191724 | 1.12488E-06 |
| ITGB4    | Type 1 T helper cell | 0.029711409  | 0.501094051 | 0.039845077  | 0.377339419 |
| ICAM3    | Type 1 T helper cell | -0.191757597 | 1.17688E-05 | -0.216801238 | 1.17704E-06 |

|          |                       |              |             |              |             |
|----------|-----------------------|--------------|-------------|--------------|-------------|
| METRNL   | Type 1 T helper cell  | -0.075088847 | 0.088699076 | -0.080497732 | 0.074147621 |
| TNFRSF1A | Type 1 T helper cell  | 0.211424047  | 1.29091E-06 | 0.211666973  | 2.11964E-06 |
| IRF1     | Type 1 T helper cell  | 0.101576673  | 0.02113824  | 0.129286076  | 0.004035077 |
| HTR2B    | Type 1 T helper cell  | -0.078246182 | 0.076047523 | -0.071420416 | 0.113241937 |
| CALD1    | Type 1 T helper cell  | 0.126827565  | 0.003941184 | 0.151902461  | 0.0007147   |
| MOCOS    | Type 1 T helper cell  | 0.355772115  | 8.2108E-17  | 0.380826151  | 1.83876E-18 |
| TRAF3IP2 | Type 1 T helper cell  | -0.053710995 | 0.223675325 | -0.053688448 | 0.23408205  |
| TLR8     | Type 1 T helper cell  | -0.044699993 | 0.311325098 | -0.024908475 | 0.58112678  |
| TRAF1    | Type 1 T helper cell  | -0.139309278 | 0.001528511 | -0.135270258 | 0.002614995 |
| DUSP14   | Type 1 T helper cell  | 0.329461252  | 1.67006E-14 | 0.327669917  | 8.39151E-14 |
| IL17A    | Type 17 T helper cell | 0.017946952  | 0.684504377 | 0.022848764  | 0.612784245 |
| IL17RA   | Type 17 T helper cell | 0.004605303  | 0.916964955 | 0.016198543  | 0.719762247 |
| C2CD4A   | Type 17 T helper cell | 0.164037964  | 0.000184809 | 0.171728298  | 0.000127204 |
| C2CD4B   | Type 17 T helper cell | -0.10002772  | 0.023197239 | -0.100892384 | 0.025077501 |
| CA2      | Type 17 T helper cell | -0.110600062 | 0.012021066 | -0.114491532 | 0.01095779  |
| CCDC65   | Type 17 T helper cell | -0.166453511 | 0.000147788 | -0.162858181 | 0.000282184 |
| CEACAM3  | Type 17 T helper cell | -0.046630972 | 0.290863874 | -0.035397644 | 0.4329193   |
| IL17C    | Type 17 T helper cell | 0.214947456  | 8.49018E-07 | 0.216582663  | 1.20724E-06 |
| IL17F    | Type 17 T helper cell | -0.123008283 | 0.005184484 | -0.107515199 | 0.016936155 |
| IL17RC   | Type 17 T helper cell | -0.165818675 | 0.000156778 | -0.188031084 | 2.64676E-05 |
| IL17RE   | Type 17 T helper cell | -0.140849489 | 0.001352475 | -0.167272658 | 0.000190762 |
| IL23A    | Type 17 T helper cell | 0.080320194  | 0.068565886 | 0.083789629  | 0.063030095 |
| ILDR1    | Type 17 T helper cell | -0.139933524 | 0.001454771 | -0.149796178 | 0.000848662 |
| LONRF3   | Type 17 T helper cell | 0.095205945  | 0.0307552   | 0.085161304  | 0.058821965 |
| SH2D6    | Type 17 T helper cell | -0.076676667 | 0.082139961 | -0.091716718 | 0.041794131 |
| TNIP2    | Type 17 T helper cell | 0.147770274  | 0.000768837 | 0.146175186  | 0.001134417 |
| ABCA1    | Type 17 T helper cell | 0.086525713  | 0.049705301 | 0.102712032  | 0.022558909 |
| ABCB1    | Type 17 T helper cell | -0.112213283 | 0.01082214  | -0.09665171  | 0.031905383 |
| ADAMTS12 | Type 17 T helper cell | 0.304510911  | 1.64052E-12 | 0.334735253  | 2.26158E-14 |
| ANK1     | Type 17 T helper cell | -0.041607976 | 0.346014008 | -0.030837368 | 0.494527809 |
| ANKRD22  | Type 17 T helper cell | -0.057382367 | 0.193559729 | -0.036892198 | 0.413734935 |
| B3GALT2  | Type 17 T helper cell | -0.270924923 | 4.08878E-10 | -0.274544142 | 5.64912E-10 |
| CAMTA1   | Type 17 T helper cell | -0.085759892 | 0.051768091 | -0.102942523 | 0.022256081 |

|         |                       |              |             |              |             |
|---------|-----------------------|--------------|-------------|--------------|-------------|
| CCR9    | Type 17 T helper cell | -0.143919863 | 0.001055904 | -0.136089473 | 0.002460921 |
| CD40    | Type 17 T helper cell | -0.15948441  | 0.000279313 | -0.156506711 | 0.000487181 |
| GPR44   | Type 17 T helper cell | -0.325956405 | 3.26516E-14 | -0.32121344  | 2.70031E-13 |
| IFT80   | Type 17 T helper cell | -0.174369326 | 6.95064E-05 | -0.183591813 | 4.11439E-05 |
| ASB2    | Type 2 T helper cell  | -0.164506005 | 0.000177018 | -0.176829464 | 7.89933E-05 |
| CSRP2   | Type 2 T helper cell  | 0.210394398  | 1.45712E-06 | 0.207963421  | 3.21123E-06 |
| DAPK1   | Type 2 T helper cell  | -0.214959904 | 8.47752E-07 | -0.219694685 | 8.39563E-07 |
| DLC1    | Type 2 T helper cell  | -0.3475889   | 4.52765E-16 | -0.348793553 | 1.50321E-15 |
| DNAJC12 | Type 2 T helper cell  | 0.168577288  | 0.000121107 | 0.172689433  | 0.000116402 |
| DUSP6   | Type 2 T helper cell  | -0.05497227  | 0.212973775 | -0.045176445 | 0.316805184 |
| GNAI1   | Type 2 T helper cell  | 0.047140928  | 0.2856143   | 0.047629523  | 0.29121427  |
| LAMP3   | Type 2 T helper cell  | -0.2789941   | 1.16061E-10 | -0.292349309 | 3.59443E-11 |
| NRP2    | Type 2 T helper cell  | 0.137059734  | 0.001823629 | 0.167362564  | 0.000189227 |
| OSBPL1A | Type 2 T helper cell  | -0.01260906  | 0.775290858 | -0.008279103 | 0.85451366  |
| PDE4B   | Type 2 T helper cell  | -0.034698394 | 0.432010967 | -0.019017451 | 0.673592864 |
| PHLDA1  | Type 2 T helper cell  | 0.088758916  | 0.044078764 | 0.105449705  | 0.019183145 |
| PLA2G4A | Type 2 T helper cell  | 0.19438623   | 8.86897E-06 | 0.190428148  | 2.07681E-05 |
| RAB27B  | Type 2 T helper cell  | 0.11541468   | 0.008752389 | 0.130066767  | 0.003816808 |
| RBMS3   | Type 2 T helper cell  | -0.19867131  | 5.54653E-06 | -0.183364046 | 4.20741E-05 |
| RNF125  | Type 2 T helper cell  | -0.066676039 | 0.130756517 | -0.058273747 | 0.196460867 |
| TMPRSS3 | Type 2 T helper cell  | -0.139153469 | 0.001547443 | -0.141655425 | 0.00161496  |
| GATA3   | Type 2 T helper cell  | -0.040137607 | 0.363339413 | -0.029517743 | 0.513189736 |
| BIRC5   | Type 2 T helper cell  | 0.522804476  | 1.81952E-37 | 0.516478039  | 5.75684E-35 |
| CDC25C  | Type 2 T helper cell  | 0.530469535  | 1.02135E-38 | 0.530477655  | 3.94394E-37 |
| CDC7    | Type 2 T helper cell  | 0.380314227  | 3.61426E-19 | 0.376319965  | 4.94519E-18 |
| CENPF   | Type 2 T helper cell  | 0.542539588  | 9.40876E-41 | 0.540255398  | 1.05516E-38 |
| CXCR6   | Type 2 T helper cell  | -0.012282814 | 0.780955099 | 0.000276221  | 0.995118937 |
| DHFR    | Type 2 T helper cell  | 0.320726608  | 8.73823E-14 | 0.326781502  | 9.87195E-14 |
| EVI5    | Type 2 T helper cell  | 0.057244306  | 0.194635619 | 0.05969889   | 0.185720284 |
| GSTA4   | Type 2 T helper cell  | -0.125966374 | 0.004195205 | -0.150849685 | 0.000778997 |
| HELLS   | Type 2 T helper cell  | 0.468757967  | 1.71009E-29 | 0.474365404  | 4.98368E-29 |
| IL26    | Type 2 T helper cell  | -0.03735097  | 0.397628662 | -0.023549606 | 0.601927183 |
| LAIR2   | Type 2 T helper cell  | -0.015196305 | 0.730815506 | -0.006521142 | 0.885163421 |

|          |                   |              |             |              |             |
|----------|-------------------|--------------|-------------|--------------|-------------|
| CCL3L1   | Regulatory T cell | 0.042277531  | 0.338301475 | 0.057790794  | 0.200201612 |
| CD72     | Regulatory T cell | -0.055516218 | 0.208474119 | -0.050542474 | 0.262674429 |
| CLEC5A   | Regulatory T cell | -0.073311779 | 0.096532172 | -0.067856194 | 0.132436724 |
| FOXP3    | Regulatory T cell | -0.044059801 | 0.31831278  | -0.038125991 | 0.398282482 |
| ITGA4    | Regulatory T cell | -0.083208352 | 0.059162615 | -0.072105627 | 0.109815582 |
| L1CAM    | Regulatory T cell | 0.036864305  | 0.403810514 | 0.048547264  | 0.28200671  |
| LIPA     | Regulatory T cell | -0.101559939 | 0.021159607 | -0.090004482 | 0.045781059 |
| LRP1     | Regulatory T cell | -0.023345997 | 0.597090142 | -0.015226372 | 0.735934733 |
| LRRC42   | Regulatory T cell | 0.426662501  | 3.37698E-24 | 0.426744115  | 3.08083E-23 |
| MARCO    | Regulatory T cell | -0.171257053 | 9.38793E-05 | -0.172978354 | 0.000113327 |
| MMP12    | Regulatory T cell | 0.31093233   | 5.24763E-13 | 0.320071005  | 3.31107E-13 |
| MNDA     | Regulatory T cell | -0.159803228 | 0.000271449 | -0.150857995 | 0.00077847  |
| MRC1     | Regulatory T cell | -0.155610487 | 0.000393513 | -0.14428273  | 0.001316824 |
| MS4A6A   | Regulatory T cell | -0.128231995 | 0.003556667 | -0.11864245  | 0.008366202 |
| PELO     | Regulatory T cell | 0.197300385  | 6.45242E-06 | 0.221409651  | 6.85701E-07 |
| PLEK     | Regulatory T cell | -0.078875392 | 0.073710667 | -0.061567484 | 0.172301805 |
| PRSS23   | Regulatory T cell | 0.241829765  | 2.739E-08   | 0.271498548  | 8.87528E-10 |
| PTGIR    | Regulatory T cell | -0.223126893 | 3.12272E-07 | -0.24408904  | 4.03894E-08 |
| ST8SIA4  | Regulatory T cell | -0.056881116 | 0.197486779 | -0.04075886  | 0.366487912 |
| STAB1    | Regulatory T cell | -0.078016313 | 0.076916136 | -0.081921193 | 0.069158333 |
| ADAM28   | Activated B cell  | -0.059105139 | 0.180498802 | -0.052491656 | 0.244688551 |
| CD180    | Activated B cell  | -0.077198041 | 0.080073795 | -0.061202965 | 0.174861006 |
| CD79B    | Activated B cell  | -0.164578046 | 0.000175846 | -0.178609749 | 6.66821E-05 |
| BLK      | Activated B cell  | -0.248750085 | 1.05591E-08 | -0.273769446 | 6.34043E-10 |
| CD19     | Activated B cell  | -0.145187265 | 0.000951997 | -0.163293283 | 0.000271621 |
| MS4A1    | Activated B cell  | -0.200370968 | 4.59128E-06 | -0.216517331 | 1.21641E-06 |
| TNFRSF17 | Activated B cell  | -0.084548569 | 0.055176396 | -0.079770657 | 0.076807027 |
| GNG7     | Activated B cell  | -0.444367255 | 2.46013E-26 | -0.448261032 | 9.6544E-26  |
| MICAL3   | Activated B cell  | 0.169056008  | 0.000115753 | 0.180801777  | 5.40048E-05 |
| SPIB     | Activated B cell  | -0.217740442 | 6.05998E-07 | -0.235532299 | 1.21645E-07 |
| HLA-DOB  | Activated B cell  | -0.305610234 | 1.35236E-12 | -0.337938396 | 1.23419E-14 |
| PNOC     | Activated B cell  | -0.053871553 | 0.222292128 | -0.052577291 | 0.243918631 |
| FCRL2    | Activated B cell  | -0.142562468 | 0.00117872  | -0.147652194 | 0.001008559 |

|          |                  |              |             |              |             |
|----------|------------------|--------------|-------------|--------------|-------------|
| BACH2    | Activated B cell | 0.039022215  | 0.376836692 | 0.059541611  | 0.186883914 |
| CR2      | Activated B cell | -0.145503291 | 0.000927602 | -0.145566621 | 0.001190364 |
| TCL1A    | Activated B cell | -0.08782015  | 0.046375043 | -0.076275514 | 0.090692241 |
| AKNA     | Activated B cell | -0.209966418 | 1.53208E-06 | -0.210391747 | 2.44763E-06 |
| ARHGAP25 | Activated B cell | -0.184905337 | 2.41674E-05 | -0.198829012 | 8.66735E-06 |
| CCL21    | Activated B cell | 0.034893517  | 0.429424738 | 0.060456904  | 0.180186929 |
| CD27     | Activated B cell | -0.149323133 | 0.00067503  | -0.158832393 | 0.000399828 |
| CD38     | Activated B cell | 0.02732701   | 0.536076322 | 0.038610517  | 0.392310153 |
| CLEC17A  | Activated B cell | -0.160977918 | 0.000244222 | -0.169615147 | 0.000154353 |
| CLEC9A   | Activated B cell | -0.314705545 | 2.65107E-13 | -0.319536245 | 3.64158E-13 |
| CLECL1   | Activated B cell | -0.240805442 | 3.14634E-08 | -0.253567012 | 1.13388E-08 |
| CD22     | Immature B cell  | -0.310895212 | 5.28274E-13 | -0.338122362 | 1.19174E-14 |
| CYBB     | Immature B cell  | -0.06094032  | 0.167316125 | -0.038808142 | 0.389889827 |
| FAM129C  | Immature B cell  | -0.242348956 | 2.55252E-08 | -0.259526846 | 4.96607E-09 |
| FCRL1    | Immature B cell  | -0.253629164 | 5.29917E-09 | -0.27284271  | 7.27595E-10 |
| FCRL3    | Immature B cell  | -0.1743678   | 6.95167E-05 | -0.178684354 | 6.6208E-05  |
| FCRL5    | Immature B cell  | 0.01421156   | 0.747646498 | 0.02045217   | 0.65054406  |
| FCRLA    | Immature B cell  | -0.117263088 | 0.00772514  | -0.131374698 | 0.003474988 |
| HDAC9    | Immature B cell  | -0.062139877 | 0.159097701 | -0.051718633 | 0.251715637 |
| HLA-DQA1 | Immature B cell  | -0.255072648 | 4.3094E-09  | -0.269006083 | 1.27921E-09 |
| HVCN1    | Immature B cell  | -0.189227535 | 1.53965E-05 | -0.193674705 | 1.48819E-05 |
| KIAA0226 | Immature B cell  | 0.094023036  | 0.032902979 | 0.101475158  | 0.024245679 |
| NCF1     | Immature B cell  | -0.126326227 | 0.004087313 | -0.131243697 | 0.003507927 |
| NCF1B    | Immature B cell  | -0.126386008 | 0.004069634 | -0.142701686 | 0.001489503 |
| P2RY10   | Immature B cell  | -0.042233275 | 0.33880783  | -0.028254603 | 0.531389417 |
| SP100    | Immature B cell  | -0.00871678  | 0.843562818 | 0.012315618  | 0.785032103 |
| TXNIP    | Immature B cell  | -0.297475304 | 5.54046E-12 | -0.287639344 | 7.59233E-11 |
| STAP1    | Immature B cell  | -0.234002244 | 7.77747E-08 | -0.254316383 | 1.02324E-08 |
| TAGAP    | Immature B cell  | -0.165757924 | 0.000157664 | -0.17032314  | 0.000144703 |
| ZCCHC2   | Immature B cell  | 0.101756424  | 0.020909903 | 0.100587408  | 0.025522544 |
| AICDA    | Memory B cell    | -0.027342948 | 0.535838478 | -0.015063864 | 0.738649763 |
| CCNA2    | Memory B cell    | 0.614489762  | 8.63061E-55 | 0.6159704    | 7.89084E-53 |
| CDKN3    | Memory B cell    | 0.626487491  | 1.70037E-57 | 0.626434205  | 4.29175E-55 |

|        |                     |              |             |              |             |
|--------|---------------------|--------------|-------------|--------------|-------------|
| CLCN5  | Memory B cell       | -0.029403042 | 0.505549307 | -0.031873917 | 0.480126748 |
| ENPP1  | Memory B cell       | 0.282606202  | 6.51676E-11 | 0.288888857  | 6.2346E-11  |
| FCER1A | Memory B cell       | -0.422285394 | 1.09103E-23 | -0.418385691 | 2.59399E-22 |
| FCRL4  | Memory B cell       | -0.121032846 | 0.005957438 | -0.132304455 | 0.003249155 |
| MYC    | Memory B cell       | 0.28653582   | 3.44509E-11 | 0.291232246  | 4.29728E-11 |
| RUNX2  | Memory B cell       | 0.13790151   | 0.00170757  | 0.147268332  | 0.001039966 |
| SORL1  | Memory B cell       | -0.033100199 | 0.453529867 | -0.034311846 | 0.447172972 |
| SOX5   | Memory B cell       | -0.061245179 | 0.165197935 | -0.070984663 | 0.115464205 |
| STAT5A | Memory B cell       | -0.152015112 | 0.000537121 | -0.141050787 | 0.001691811 |
| STAT5B | Memory B cell       | -0.040946215 | 0.353745601 | -0.032921121 | 0.465812246 |
| TLR9   | Memory B cell       | -0.00906758  | 0.837353097 | -0.005749705 | 0.898670389 |
| AKT3   | Natural killer cell | 0.109731236  | 0.012714219 | 0.131009225  | 0.003567591 |
| AXL    | Natural killer cell | -0.059021238 | 0.181119367 | -0.045552429 | 0.312790215 |
| BST2   | Natural killer cell | -0.03027508  | 0.493004115 | -0.020127924 | 0.65572501  |
| CDH2   | Natural killer cell | 0.193565407  | 9.69206E-06 | 0.206689128  | 3.69827E-06 |
| CRTAM  | Natural killer cell | -0.112042014 | 0.01094419  | -0.102473762 | 0.022875705 |
| CSF2RA | Natural killer cell | -0.132769255 | 0.002535531 | -0.124793033 | 0.005525684 |
| CTSZ   | Natural killer cell | -0.11538081  | 0.008772298 | -0.103566811 | 0.021453503 |
| CXCL1  | Natural killer cell | 0.054878662  | 0.213755123 | 0.058421457  | 0.195327028 |
| CYTH1  | Natural killer cell | -0.151204572 | 0.000575609 | -0.154937023 | 0.000555837 |
| DAXX   | Natural killer cell | 0.185089874  | 2.37116E-05 | 0.167196047  | 0.000192079 |
| DGKH   | Natural killer cell | 0.143814164  | 0.001065026 | 0.165471602  | 0.00022407  |
| DLL4   | Natural killer cell | 0.02283495   | 0.60514519  | 0.019197869  | 0.670677032 |
| DPYD   | Natural killer cell | -0.101193805 | 0.021631825 | -0.081725659 | 0.069826948 |
| ERBB3  | Natural killer cell | 0.012777608  | 0.7723692   | 0.002403333  | 0.957550831 |
| F11R   | Natural killer cell | 0.029207699  | 0.508382326 | 0.021506153  | 0.633820031 |
| FAM27A | Natural killer cell | -0.121268915 | 0.005859916 | -0.110225621 | 0.014338924 |
| FAM49A | Natural killer cell | -0.162553891 | 0.000211692 | -0.161709385 | 0.000311947 |
| FASLG  | Natural killer cell | 0.064262078  | 0.14530955  | 0.088203094  | 0.050315589 |
| FCGR1A | Natural killer cell | -0.008899032 | 0.840335425 | 0.005550397  | 0.902164971 |
| FN1    | Natural killer cell | 0.187791514  | 1.79049E-05 | 0.209698092  | 2.6459E-06  |
| FSTL1  | Natural killer cell | 0.111077944  | 0.011654229 | 0.140452534  | 0.001771138 |
| FUCA1  | Natural killer cell | -0.337875901 | 3.22265E-15 | -0.333993736 | 2.59937E-14 |

|          |                                |              |             |              |             |
|----------|--------------------------------|--------------|-------------|--------------|-------------|
| GBP3     | Natural killer cell            | 0.035330327  | 0.423667756 | 0.062778073  | 0.164002926 |
| GLS2     | Natural killer cell            | -0.274097724 | 2.50431E-10 | -0.289035919 | 6.0913E-11  |
| GRB2     | Natural killer cell            | 0.135540388  | 0.002051568 | 0.143379612  | 0.001413061 |
| LST1     | Natural killer cell            | -0.316208003 | 2.01447E-13 | -0.327676244 | 8.38179E-14 |
| BCL2     | Natural killer cell            | -0.141910197 | 0.001242302 | -0.137340305 | 0.002241594 |
| CDC5L    | Natural killer cell            | 0.382630117  | 2.11399E-19 | 0.376040226  | 5.25576E-18 |
| FGF18    | Natural killer cell            | -0.225215546 | 2.40391E-07 | -0.224134285 | 4.95453E-07 |
| FUT5     | Natural killer cell            | 0.093100877  | 0.034664948 | 0.092039663  | 0.041075983 |
| FZR1     | Natural killer cell            | 0.066104374  | 0.134096683 | 0.061932054  | 0.169770287 |
| IGFBP5   | Natural killer cell            | 0.148289315  | 0.000736217 | 0.159028692  | 0.000393166 |
| KANK2    | Natural killer cell            | -0.198812615 | 5.46039E-06 | -0.201142337 | 6.76891E-06 |
| LDB3     | Natural killer cell            | -0.260034951 | 2.09656E-09 | -0.260016819 | 4.63588E-09 |
| ABAT     | CD56bright natural killer cell | -0.200204133 | 4.67759E-06 | -0.200370561 | 7.35321E-06 |
| C11orf75 | CD56bright natural killer cell | -0.071394894 | 0.105590056 | -0.059868861 | 0.184468758 |
| C5orf15  | CD56bright natural killer cell | 0.223202628  | 3.09337E-07 | 0.235223115  | 1.2649E-07  |
| CDHR1    | CD56bright natural killer cell | -0.214793471 | 8.64838E-07 | -0.226397559 | 3.77056E-07 |
| DCAF12   | CD56bright natural killer cell | 0.174059773  | 7.16325E-05 | 0.185428019  | 3.43242E-05 |
| DYNLL1   | CD56bright natural killer cell | 0.467684182  | 2.38487E-29 | 0.467764799  | 3.59464E-28 |
| GPR137B  | CD56bright natural killer cell | 0.073162383  | 0.097215074 | 0.086442486  | 0.055104161 |
| HCP5     | CD56bright natural killer cell | -0.024241623 | 0.583092    | -0.017843817 | 0.692678491 |
| HDGFRP2  | CD56bright natural killer cell | -0.00629245  | 0.886722324 | -0.02163604  | 0.631771682 |
| KRT86    | CD56bright natural killer cell | 0.09334784   | 0.034185371 | 0.077796538  | 0.084420364 |
| MLST8    | CD56bright natural killer cell | 0.052167361  | 0.237287465 | 0.045818066  | 0.309973817 |
| ELMOD3   | CD56bright natural killer cell | -0.22946841  | 1.40013E-07 | -0.231678217 | 1.97183E-07 |
| ENTPD5   | CD56bright natural killer cell | 0.306550798  | 1.14562E-12 | 0.312603118  | 1.22917E-12 |
| FAM119A  | CD56bright natural killer cell | 0.225222917  | 2.40168E-07 | 0.219013082  | 9.09494E-07 |
| FAM179A  | CD56bright natural killer cell | -0.283286022 | 5.84049E-11 | -0.29578415  | 2.06536E-11 |
| CLIC2    | CD56bright natural killer cell | -0.148548747 | 0.000720397 | -0.14464535  | 0.001279909 |
| COX7A2L  | CD56bright natural killer cell | 0.30498814   | 1.50871E-12 | 0.307555725  | 2.92181E-12 |
| CREB3L4  | CD56bright natural killer cell | 0.070726548  | 0.108901806 | 0.06529056   | 0.147742777 |
| CSF1     | CD56bright natural killer cell | -0.099928445 | 0.023334931 | -0.093665922 | 0.037616051 |
| CSNK2A2  | CD56bright natural killer cell | 0.186195911  | 2.11461E-05 | 0.195948489  | 1.17448E-05 |
| CSTA     | CD56bright natural killer cell | -0.119586685 | 0.006587347 | -0.117471412 | 0.009035387 |



|         |                                 |              |             |              |             |
|---------|---------------------------------|--------------|-------------|--------------|-------------|
| CSTB    | CD56bright natural killer cell  | 0.024948408  | 0.572154246 | 0.009141336  | 0.839557448 |
| CTPS    | CD56bright natural killer cell  | 0.417179283  | 4.19387E-23 | 0.41035877   | 1.89889E-21 |
| CTSD    | CD56bright natural killer cell  | -0.298753228 | 4.45249E-12 | -0.307560696 | 2.91934E-12 |
| FST     | CD56bright natural killer cell  | 0.210941093  | 1.36647E-06 | 0.216107129  | 1.27554E-06 |
| GATA2   | CD56bright natural killer cell  | -0.068400877 | 0.121067799 | -0.068246963 | 0.130217021 |
| GMPR    | CD56bright natural killer cell  | -0.35769963  | 5.4522E-17  | -0.353555309 | 5.81527E-16 |
| HDC     | CD56bright natural killer cell  | -0.288890092 | 2.34028E-11 | -0.295241939 | 2.25526E-11 |
| HEY1    | CD56bright natural killer cell  | 0.007227875  | 0.870022307 | 0.014260021  | 0.752126856 |
| HOXA1   | CD56bright natural killer cell  | 0.204380191  | 2.9209E-06  | 0.21451523   | 1.53218E-06 |
| HS2ST1  | CD56bright natural killer cell  | 0.290432933  | 1.81287E-11 | 0.297377613  | 1.59319E-11 |
| HS3ST1  | CD56bright natural killer cell  | -0.001773288 | 0.967977885 | 0.01158679   | 0.797469012 |
| BCL11B  | CD56bright natural killer cell  | -0.093009599 | 0.034843645 | -0.080341557 | 0.07471244  |
| CDH3    | CD56bright natural killer cell  | 0.162098324  | 0.000220652 | 0.171294737  | 0.000132379 |
| MYL6B   | CD56bright natural killer cell  | 0.347112476  | 4.9932E-16  | 0.33671257   | 1.55741E-14 |
| NAA16   | CD56bright natural killer cell  | -0.056323332 | 0.201924731 | -0.056398791 | 0.211272976 |
| CYP27B1 | CD56bright natural killer cell  | 0.08091927   | 0.066520764 | 0.086223969  | 0.055724086 |
| EIF3M   | CD56bright natural killer cell  | 0.336917686  | 3.89663E-15 | 0.346023859  | 2.59251E-15 |
| CYP27A1 | CD56dim natural killer cell     | -0.354072784 | 1.17529E-16 | -0.361142647 | 1.23826E-16 |
| DDX55   | CD56dim natural killer cell     | 0.320689432  | 8.79899E-14 | 0.31016715   | 1.87065E-12 |
| DYRK2   | CD56dim natural killer cell     | 0.250254573  | 8.55006E-09 | 0.260081316  | 4.59403E-09 |
| RPL37A  | CD56dim natural killer cell     | -0.023203191 | 0.599336127 | -0.027730633 | 0.539033537 |
| NOTCH3  | CD56dim natural killer cell     | 0.238805482  | 4.11705E-08 | 0.234070426  | 1.46248E-07 |
| AKR7A3  | CD56dim natural killer cell     | 0.178022161  | 4.85197E-05 | 0.162870024  | 0.000281891 |
| GPRC5C  | CD56dim natural killer cell     | -0.273971572 | 2.55392E-10 | -0.287679027 | 7.54508E-11 |
| GRIN1   | CD56dim natural killer cell     | 0.088986079  | 0.04353772  | 0.103309292  | 0.02178147  |
| HLA-E   | CD56dim natural killer cell     | -0.194520555 | 8.74078E-06 | -0.197130285 | 1.03738E-05 |
| PORCN   | CD56dim natural killer cell     | 0.086433071  | 0.049951125 | 0.079245012  | 0.078777538 |
| PSMC4   | CD56dim natural killer cell     | 0.365818987  | 9.422E-18   | 0.371781789  | 1.31877E-17 |
| UPP1    | CD56dim natural killer cell     | 0.095765355  | 0.02978203  | 0.108816045  | 0.015642289 |
| IL21R   | CD56dim natural killer cell     | -0.022542616 | 0.609774644 | 0.000436085  | 0.992294093 |
| CCR2    | Myeloid derived suppressor cell | -0.126005908 | 0.004183227 | -0.10866265  | 0.01579021  |
| CD14    | Myeloid derived suppressor cell | -0.026168348 | 0.55350726  | -0.009628322 | 0.831135319 |
| CD2     | Myeloid derived suppressor cell | -0.107850239 | 0.01433687  | -0.106346476 | 0.0181775   |

|        |                                 |              |             |              |             |
|--------|---------------------------------|--------------|-------------|--------------|-------------|
| CD86   | Myeloid derived suppressor cell | -0.04899258  | 0.267092336 | -0.03779769  | 0.402360015 |
| CXCR4  | Myeloid derived suppressor cell | -0.116377952 | 0.008202789 | -0.126882409 | 0.004779861 |
| FCGR2A | Myeloid derived suppressor cell | -0.023157682 | 0.600052672 | -0.005030384 | 0.911291358 |
| FCGR2B | Myeloid derived suppressor cell | -0.035664655 | 0.41929202  | -0.024005937 | 0.594904776 |
| FCGR3A | Myeloid derived suppressor cell | 0.13324885   | 0.002444952 | 0.154307022  | 0.000585837 |
| FERMT3 | Myeloid derived suppressor cell | -0.159723153 | 0.000273404 | -0.169277435 | 0.000159166 |
| GPSM3  | Myeloid derived suppressor cell | -0.224258759 | 2.71082E-07 | -0.22923698  | 2.66603E-07 |
| IL18BP | Myeloid derived suppressor cell | -0.019217784 | 0.663488841 | -0.005371054 | 0.905311108 |
| IL4R   | Myeloid derived suppressor cell | 0.009972168  | 0.821387911 | 0.018153193  | 0.687627902 |
| ITGAL  | Myeloid derived suppressor cell | -0.193864637 | 9.38392E-06 | -0.206867732 | 3.62598E-06 |
| ITGAM  | Myeloid derived suppressor cell | -0.146296872 | 0.000868867 | -0.133815697 | 0.002910383 |
| PARVG  | Myeloid derived suppressor cell | -0.280986796 | 8.45001E-11 | -0.312980793 | 1.15129E-12 |
| PSAP   | Myeloid derived suppressor cell | -0.031924187 | 0.46974196  | -0.019968948 | 0.658271271 |
| PTGER2 | Myeloid derived suppressor cell | -0.037277654 | 0.398556301 | -0.019850992 | 0.660163087 |
| PTGES2 | Myeloid derived suppressor cell | 0.25723632   | 3.15348E-09 | 0.250126732  | 1.80898E-08 |
| S100A8 | Myeloid derived suppressor cell | 0.068947766  | 0.118115662 | 0.084388759  | 0.061162476 |
| S100A9 | Myeloid derived suppressor cell | 0.07815868   | 0.076377225 | 0.08521516   | 0.058661607 |
| BTN2A2 | Natural killer T cell           | -0.230938865 | 1.1586E-07  | -0.235052921 | 1.29236E-07 |
| CD101  | Natural killer T cell           | -0.154557602 | 0.000431349 | -0.153312412 | 0.000636275 |
| CD109  | Natural killer T cell           | 0.276427391  | 1.7402E-10  | 0.30199651   | 7.43963E-12 |
| CNPY3  | Natural killer T cell           | -0.024314762 | 0.581955659 | -0.042366227 | 0.347876303 |
| CNPY4  | Natural killer T cell           | 0.070649717  | 0.109287709 | 0.067004805  | 0.137373976 |
| CREB1  | Natural killer T cell           | 0.301205055  | 2.91827E-12 | 0.318084215  | 4.71061E-13 |
| CRTC2  | Natural killer T cell           | 0.047308467  | 0.283903642 | 0.032117112  | 0.476781287 |
| CRTC3  | Natural killer T cell           | 0.102491935  | 0.019997772 | 0.110946978  | 0.013709626 |
| CSF2   | Natural killer T cell           | -0.17971755  | 4.09639E-05 | -0.167497405 | 0.000186947 |
| KLRC1  | Natural killer T cell           | 0.087978847  | 0.045979954 | 0.093999474  | 0.036937827 |
| FUT4   | Natural killer T cell           | 0.21106591   | 1.34655E-06 | 0.22387276   | 5.11242E-07 |
| ICAM2  | Natural killer T cell           | -0.208925222 | 1.7302E-06  | -0.211150217 | 2.24713E-06 |
| IL32   | Natural killer T cell           | 0.045405592  | 0.303741241 | 0.066051658  | 0.143067884 |
| LAMP2  | Natural killer T cell           | 0.104659077  | 0.01750862  | 0.11763824   | 0.008937232 |
| LILRB5 | Natural killer T cell           | -0.05768933  | 0.191183229 | -0.054092088 | 0.230579144 |
| KLRG1  | Natural killer T cell           | -0.158877555 | 0.000294875 | -0.156580402 | 0.00048416  |

|          |                          |              |             |              |             |
|----------|--------------------------|--------------|-------------|--------------|-------------|
| HSPA4    | Natural killer T cell    | 0.37862194   | 5.3339E-19  | 0.390909927  | 1.89918E-19 |
| HSPB6    | Natural killer T cell    | -0.24175588  | 2.76659E-08 | -0.240447926 | 6.48987E-08 |
| ISM2     | Natural killer T cell    | 0.178439327  | 4.6547E-05  | 0.183002929  | 4.35897E-05 |
| ITIH2    | Natural killer T cell    | -0.080487954 | 0.067988061 | -0.089958581 | 0.045892191 |
| KDM4C    | Natural killer T cell    | -0.038981932 | 0.37732985  | -0.033273247 | 0.461052591 |
| KIR2DS4  | Natural killer T cell    | 0.029627934  | 0.502298036 | 0.045317699  | 0.315292857 |
| KIRREL3  | Natural killer T cell    | -0.049147605 | 0.265579875 | -0.040217199 | 0.372896706 |
| SDCBP    | Natural killer T cell    | 0.160017021  | 0.000266291 | 0.178685189  | 6.62027E-05 |
| NFATC2IP | Natural killer T cell    | -0.06164829  | 0.162428055 | -0.064836517 | 0.150586554 |
| MICB     | Natural killer T cell    | 0.131802423  | 0.0027275   | 0.145087022  | 0.001236233 |
| KIR2DL1  | Natural killer T cell    | -0.006249376 | 0.887492582 | -0.010350957 | 0.818673629 |
| KIR2DL3  | Natural killer T cell    | 0.073300603  | 0.096583122 | 0.081901626  | 0.069225006 |
| KIR3DL1  | Natural killer T cell    | 0.057520882  | 0.192484687 | 0.066124983  | 0.14262354  |
| KIR3DL2  | Natural killer T cell    | 0.033200522  | 0.452161576 | 0.049856632  | 0.269214179 |
| NCR1     | Natural killer T cell    | 0.118123245  | 0.007284941 | 0.138526549  | 0.002050239 |
| FOSL1    | Natural killer T cell    | 0.277072766  | 1.57231E-10 | 0.290637208  | 4.72468E-11 |
| TSLP     | Natural killer T cell    | -0.323068458 | 5.6365E-14  | -0.320021207 | 3.34056E-13 |
| SLC7A7   | Natural killer T cell    | 0.01877992   | 0.670700998 | 0.034793299  | 0.440820179 |
| SPP1     | Natural killer T cell    | 0.202169254  | 3.75248E-06 | 0.208117786  | 3.15657E-06 |
| TREM2    | Natural killer T cell    | -0.26249692  | 1.4582E-09  | -0.268964974 | 1.28691E-09 |
| UBASH3A  | Natural killer T cell    | -0.121251166 | 0.005867198 | -0.114982066 | 0.010618336 |
| YBX2     | Natural killer T cell    | 0.257617299  | 2.98387E-09 | 0.254925049  | 9.41152E-09 |
| CCDC88A  | Natural killer T cell    | 0.13325992   | 0.002442897 | 0.138987632  | 0.001979983 |
| CLEC1A   | Natural killer T cell    | -0.238918857 | 4.05503E-08 | -0.254950954 | 9.37803E-09 |
| THBD     | Natural killer T cell    | -0.164611961 | 0.000175297 | -0.163966832 | 0.000255995 |
| PDPN     | Natural killer T cell    | 0.030938421  | 0.483573789 | 0.04044379   | 0.370207366 |
| VCAM1    | Natural killer T cell    | 0.109343312  | 0.013034933 | 0.144076424  | 0.001338261 |
| EMR1     | Natural killer T cell    | -0.059522317 | 0.177436531 | -0.053866006 | 0.232536549 |
| ABCD1    | Activated dendritic cell | 0.09067378   | 0.039690622 | 0.08268309   | 0.066602917 |
| C1QC     | Activated dendritic cell | -0.013055007 | 0.767567694 | -0.003394793 | 0.940067115 |
| CAPG     | Activated dendritic cell | -0.117600401 | 0.007549759 | -0.10740045  | 0.01705466  |
| CCL3L3   | Activated dendritic cell | -0.060873088 | 0.167785982 | -0.064388395 | 0.153433846 |
| CD207    | Activated dendritic cell | -0.378712017 | 5.22484E-19 | -0.373530046 | 9.05439E-18 |

|          |                             |              |             |              |             |
|----------|-----------------------------|--------------|-------------|--------------|-------------|
| CD302    | Activated dendritic cell    | -0.383483821 | 1.7329E-19  | -0.388408295 | 3.36014E-19 |
| ATP5B    | Activated dendritic cell    | 0.494471022  | 4.13873E-33 | 0.493598781  | 1.22463E-31 |
| ATP5L    | Activated dendritic cell    | 0.105327687  | 0.016797434 | 0.094789564  | 0.035372621 |
| ATP6V1A  | Activated dendritic cell    | 0.192387865  | 1.10009E-05 | 0.195882709  | 1.1826E-05  |
| BCL2L1   | Activated dendritic cell    | 0.033460971  | 0.448620223 | 0.036100211  | 0.423837834 |
| C1QB     | Activated dendritic cell    | -0.052614534 | 0.233285491 | -0.045399409 | 0.314420198 |
| SNURF    | Activated dendritic cell    | 0.023303328  | 0.597760816 | 0.034571588  | 0.443739235 |
| SPCS3    | Activated dendritic cell    | 0.230430718  | 1.23712E-07 | 0.252175201  | 1.37088E-08 |
| CCNA1    | Activated dendritic cell    | -0.085455262 | 0.052608255 | -0.081525188 | 0.070517927 |
| CEACAM8  | Activated dendritic cell    | -0.278987042 | 1.16191E-10 | -0.272304369 | 7.87965E-10 |
| NOS2     | Activated dendritic cell    | 0.052822176  | 0.231443516 | 0.04191297   | 0.353062854 |
| SRA1     | Activated dendritic cell    | -0.038551976 | 0.382618224 | -0.03149772  | 0.485326848 |
| TNFRSF6B | Activated dendritic cell    | 0.021193795  | 0.631334803 | 0.036963872  | 0.41282769  |
| TREM1    | Activated dendritic cell    | 0.050777026  | 0.250038363 | 0.047050556  | 0.297125496 |
| TREML1   | Activated dendritic cell    | -0.380833398 | 3.20602E-19 | -0.400662096 | 1.95959E-20 |
| RHOA     | Activated dendritic cell    | 0.1025562    | 0.019919744 | 0.116474412  | 0.009642237 |
| SLC25A37 | Activated dendritic cell    | 0.061099293  | 0.16620904  | 0.061302326  | 0.174160628 |
| TNFSF14  | Activated dendritic cell    | -0.111580258 | 0.011279345 | -0.114641396 | 0.010853077 |
| TREML4   | Activated dendritic cell    | 0.004398468  | 0.920681694 | 0.003135631  | 0.944634816 |
| VNN2     | Activated dendritic cell    | -0.107700883 | 0.014473195 | -0.100391079 | 0.025812631 |
| XPO6     | Activated dendritic cell    | 0.229041537  | 1.4789E-07  | 0.236495897  | 1.07665E-07 |
| CLEC4C   | Activated dendritic cell    | 0.012752935  | 0.772796679 | 0.030470545  | 0.499678791 |
| TNFAIP2  | Activated dendritic cell    | 0.012487075  | 0.777407378 | 0.030815894  | 0.494828576 |
| UBD      | Activated dendritic cell    | 0.080410244  | 0.068255222 | 0.099394807  | 0.027328888 |
| ACTR3    | Activated dendritic cell    | 0.445476455  | 1.78981E-26 | 0.46724462   | 4.19267E-28 |
| RAB1A    | Activated dendritic cell    | 0.348198087  | 3.99408E-16 | 0.359303346  | 1.80848E-16 |
| SLA      | Activated dendritic cell    | -0.12032725  | 0.006257681 | -0.121519146 | 0.006906251 |
| HLA-DQA2 | Activated dendritic cell    | -0.166544176 | 0.000146544 | -0.168321656 | 0.000173561 |
| SIGLEC5  | Activated dendritic cell    | -0.078249742 | 0.076034135 | -0.070921853 | 0.115787327 |
| SLAMF9   | Activated dendritic cell    | 0.224373828  | 2.672E-07   | 0.218027163  | 1.02062E-06 |
| CBX6     | Plasmacytoid dendritic cell | -0.031001808 | 0.482677796 | -0.018341187 | 0.684565646 |
| DAB2     | Plasmacytoid dendritic cell | -0.098062911 | 0.026057081 | -0.086156686 | 0.055916129 |
| DDX17    | Plasmacytoid dendritic cell | -0.148866471 | 0.000701452 | -0.147346621 | 0.001033488 |

|         |                             |              |             |              |             |
|---------|-----------------------------|--------------|-------------|--------------|-------------|
| HIGD1A  | Plasmacytoid dendritic cell | 0.189509155  | 1.49455E-05 | 0.192073779  | 1.75523E-05 |
| IDH3A   | Plasmacytoid dendritic cell | 0.167658248  | 0.000132043 | 0.173418275  | 0.000108792 |
| IL3RA   | Plasmacytoid dendritic cell | -0.219670368 | 4.78786E-07 | -0.211519986 | 2.15518E-06 |
| MAGED1  | Plasmacytoid dendritic cell | 0.169075113  | 0.000115544 | 0.169471943  | 0.000156377 |
| NUCB2   | Plasmacytoid dendritic cell | 0.033549923  | 0.447414339 | 0.03898862   | 0.387687433 |
| OFD1    | Plasmacytoid dendritic cell | -0.15653291  | 0.000362929 | -0.158610327 | 0.000407491 |
| OGT     | Plasmacytoid dendritic cell | -0.159043559 | 0.00029054  | -0.149062662 | 0.000900521 |
| PDIA4   | Plasmacytoid dendritic cell | 0.414632345  | 8.1392E-23  | 0.418924484  | 2.26516E-22 |
| SERTAD2 | Plasmacytoid dendritic cell | 0.101332834  | 0.021451447 | 0.10795163   | 0.016491994 |
| SIRPA   | Plasmacytoid dendritic cell | -0.026919499 | 0.542175386 | -0.013106726 | 0.771594176 |
| TMED2   | Plasmacytoid dendritic cell | 0.513454841  | 5.53479E-36 | 0.525422125  | 2.44981E-36 |
| ENG     | Plasmacytoid dendritic cell | -0.241943844 | 2.69693E-08 | -0.23409283  | 1.45837E-07 |
| FCAR    | Plasmacytoid dendritic cell | 0.108530588  | 0.013730067 | 0.117968767  | 0.008745563 |
| IGF1    | Plasmacytoid dendritic cell | 0.023244262  | 0.598689794 | 0.040385265  | 0.370900823 |
| ITGA2B  | Plasmacytoid dendritic cell | -0.20735165  | 2.07686E-06 | -0.21974759  | 8.34356E-07 |
| GABARAP | Plasmacytoid dendritic cell | -0.227584568 | 1.78122E-07 | -0.237495364 | 9.48073E-08 |
| GPX1    | Plasmacytoid dendritic cell | -0.147208093 | 0.000805674 | -0.154299339 | 0.000586212 |
| KRT23   | Plasmacytoid dendritic cell | -0.003963405 | 0.928505135 | -0.010482725 | 0.816406131 |
| PROK2   | Plasmacytoid dendritic cell | 0.044191516  | 0.316866812 | 0.056087773  | 0.213805875 |
| RALB    | Plasmacytoid dendritic cell | 0.265747012  | 8.97728E-10 | 0.294294857  | 2.62862E-11 |
| RETNLB  | Plasmacytoid dendritic cell | 0.245539014  | 1.64917E-08 | 0.241110731  | 5.95646E-08 |
| RNF141  | Plasmacytoid dendritic cell | 0.029008973  | 0.511272893 | 0.041112594  | 0.362339801 |
| SEC14L1 | Plasmacytoid dendritic cell | 0.027731665  | 0.530054253 | 0.038477576  | 0.393943377 |
| SEPX1   | Plasmacytoid dendritic cell | 0.170288419  | 0.000102977 | 0.17114548   | 0.000134206 |
| EMP3    | Plasmacytoid dendritic cell | -0.095099115 | 0.030944109 | -0.086347038 | 0.055374235 |
| CD300LF | Plasmacytoid dendritic cell | -0.25575356  | 3.90723E-09 | -0.261785215 | 3.61222E-09 |
| ABTB1   | Plasmacytoid dendritic cell | -0.461113049 | 1.77969E-28 | -0.459902102 | 3.57899E-27 |
| KLHL21  | Plasmacytoid dendritic cell | -0.059541992 | 0.177293064 | -0.058793299 | 0.19249391  |
| PHRF1   | Plasmacytoid dendritic cell | 0.040131282  | 0.363415096 | 0.033807575  | 0.45388216  |
| ACADM   | Immature dendritic cell     | 0.1427457    | 0.001161406 | 0.135982364  | 0.002480584 |
| AHCYL1  | Immature dendritic cell     | 0.068584666  | 0.120069342 | 0.064987134  | 0.149638632 |
| ALDH1A2 | Immature dendritic cell     | -0.079472275 | 0.071548306 | -0.074949091 | 0.096461831 |
| ALDH3A2 | Immature dendritic cell     | -0.091693898 | 0.037507804 | -0.116233329 | 0.009794311 |

|          |                         |              |             |              |             |
|----------|-------------------------|--------------|-------------|--------------|-------------|
| ALDH9A1  | Immature dendritic cell | -0.002978732 | 0.946236146 | -0.00159863  | 0.971756585 |
| ALOX15   | Immature dendritic cell | -0.209378989 | 1.64101E-06 | -0.193507931 | 1.51409E-05 |
| AMT      | Immature dendritic cell | -0.33081205  | 1.28679E-14 | -0.330556841 | 4.93114E-14 |
| ARL1     | Immature dendritic cell | 0.350197152  | 2.64169E-16 | 0.358015856  | 2.35414E-16 |
| ATIC     | Immature dendritic cell | 0.375688725  | 1.04155E-18 | 0.37681573   | 4.43853E-18 |
| ATP5A1   | Immature dendritic cell | 0.135822707  | 0.002007336 | 0.141058952  | 0.001690751 |
| CAPZA1   | Immature dendritic cell | 0.353003734  | 1.47114E-16 | 0.365459772  | 5.04076E-17 |
| LILRA5   | Immature dendritic cell | 0.076712121  | 0.081998106 | 0.100325408  | 0.025910297 |
| RDX      | Immature dendritic cell | 0.39458066   | 1.23967E-20 | 0.398068955  | 3.61123E-20 |
| RRAGD    | Immature dendritic cell | -0.074778017 | 0.090031068 | -0.071606156 | 0.112304965 |
| TACSTD2  | Immature dendritic cell | -0.035289036 | 0.424210025 | -0.039725206 | 0.378777439 |
| INPP5F   | Immature dendritic cell | 0.121213655  | 0.005882615 | 0.135233319  | 0.002622145 |
| RAB38    | Immature dendritic cell | -0.045926874 | 0.298217701 | -0.036884919 | 0.413827136 |
| PLAU     | Immature dendritic cell | 0.149679296  | 0.000655067 | 0.168440373  | 0.000171709 |
| CSF3R    | Immature dendritic cell | -0.212954555 | 1.07702E-06 | -0.215982636 | 1.29402E-06 |
| SLC18A2  | Immature dendritic cell | -0.267192874 | 7.21946E-10 | -0.273210567 | 6.88956E-10 |
| AMPD2    | Immature dendritic cell | -0.000731823 | 0.986781764 | -0.001412398 | 0.975045662 |
| CLTB     | Immature dendritic cell | -0.056787508 | 0.198226552 | -0.056589571 | 0.209730031 |
| C1orf162 | Immature dendritic cell | -0.237265012 | 5.05629E-08 | -0.253772671 | 1.10241E-08 |
| AIF1     | Macrophage              | -0.164087821 | 0.000183964 | -0.161466083 | 0.000318615 |
| CCL1     | Macrophage              | 0.00726001   | 0.869449575 | 0.026240141  | 0.561074131 |
| CCL14    | Macrophage              | -0.350637739 | 2.41068E-16 | -0.364383658 | 6.31456E-17 |
| CCL23    | Macrophage              | -0.210853136 | 1.38068E-06 | -0.216373758 | 1.2368E-06  |
| CCL26    | Macrophage              | 0.283871586  | 5.31326E-11 | 0.305921866  | 3.85338E-12 |
| CD300LB  | Macrophage              | -0.200777213 | 4.38742E-06 | -0.199020635 | 8.49258E-06 |
| CNR1     | Macrophage              | -0.307848627 | 9.10315E-13 | -0.30757201  | 2.91373E-12 |
| CNR2     | Macrophage              | -0.203667942 | 3.16736E-06 | -0.222884436 | 5.75393E-07 |
| EIF1     | Macrophage              | 0.101423814  | 0.021334117 | 0.089881433  | 0.046079487 |
| EIF4A1   | Macrophage              | 0.431235728  | 9.73622E-25 | 0.433958588  | 4.66643E-24 |
| FPR1     | Macrophage              | 0.023200642  | 0.599376248 | 0.046803648  | 0.29967058  |
| FPR2     | Macrophage              | 0.092949906  | 0.034960931 | 0.11483197   | 0.0107212   |
| FRAT2    | Macrophage              | 0.127721432  | 0.003692331 | 0.122535377  | 0.006447838 |
| GPR27    | Macrophage              | -0.088156615 | 0.045540744 | -0.090762031 | 0.043979355 |

|         |            |              |             |              |             |
|---------|------------|--------------|-------------|--------------|-------------|
| GPR77   | Macrophage | -0.016865847 | 0.702577011 | -0.028659966 | 0.525513478 |
| RNASE2  | Macrophage | 0.046065379  | 0.296761416 | 0.071735773  | 0.111654725 |
| MS4A2   | Macrophage | -0.300673414 | 3.19932E-12 | -0.292059043 | 3.76545E-11 |
| BASP1   | Macrophage | 0.255860082  | 3.84771E-09 | 0.2511112    | 1.58375E-08 |
| IGSF6   | Macrophage | -0.15150903  | 0.000560861 | -0.138241923 | 0.002094738 |
| HK3     | Macrophage | -0.105390236 | 0.016732213 | -0.102041017 | 0.023460928 |
| VNN1    | Macrophage | 0.012789863  | 0.772156882 | 0.021995429  | 0.62611873  |
| FES     | Macrophage | -0.160163781 | 0.000262804 | -0.158466914 | 0.000412513 |
| NPL     | Macrophage | -0.070482137 | 0.110133157 | -0.071592539 | 0.11237345  |
| FZD2    | Macrophage | -0.09907288  | 0.024551189 | -0.100598969 | 0.025505551 |
| FAM198B | Macrophage | 0.162178535  | 0.000219049 | 0.179580968  | 6.0753E-05  |
| HNMT    | Macrophage | -0.259190318 | 2.37265E-09 | -0.248321293 | 2.30517E-08 |
| SLC15A3 | Macrophage | -0.195394657 | 7.94875E-06 | -0.204537293 | 4.68484E-06 |
| CD4     | Macrophage | -0.172260393 | 8.52572E-05 | -0.173715551 | 0.000105824 |
| TXNDC3  | Macrophage | -0.227427164 | 1.81724E-07 | -0.244920022 | 3.62074E-08 |
| FRMD4A  | Macrophage | -0.121295666 | 0.005848955 | -0.122852639 | 0.006310421 |
| CRYBB1  | Macrophage | -0.118479772 | 0.007109159 | -0.107739399 | 0.016706693 |
| HRH1    | Macrophage | 0.139166383  | 0.001545866 | 0.160483698  | 0.000346916 |
| WNT5B   | Macrophage | -0.00330937  | 0.940278946 | 0.002921574  | 0.948408938 |
| GIPR    | Eosinophil | -0.316430895 | 1.9338E-13  | -0.312993344 | 1.14879E-12 |
| LRMP    | Eosinophil | -0.213444951 | 1.016E-06   | -0.22788186  | 3.14743E-07 |
| FOSB    | Eosinophil | -0.209305844 | 1.65508E-06 | -0.213616115 | 1.69829E-06 |
| RRP12   | Eosinophil | 0.280515718  | 9.11046E-11 | 0.268067704  | 1.46654E-09 |
| GPR183  | Eosinophil | -0.111455057 | 0.011371772 | -0.109299303 | 0.01518419  |
| NR4A3   | Eosinophil | -0.065643757 | 0.136835561 | -0.073017714 | 0.105382093 |
| ST3GAL6 | Eosinophil | -0.355742771 | 8.26196E-17 | -0.3515185   | 8.7468E-16  |
| DEPDC5  | Eosinophil | -0.059548274 | 0.177247279 | -0.06987678  | 0.121268226 |
| PDE6C   | Eosinophil | -0.003253986 | 0.941276592 | 0.006258897  | 0.889751494 |
| PKD2L2  | Eosinophil | -0.072159565 | 0.101899267 | -0.07124145  | 0.114150534 |
| GPR65   | Eosinophil | -0.122297289 | 0.005451611 | -0.113267759 | 0.011846905 |
| IL5RA   | Eosinophil | -0.154380052 | 0.000438054 | -0.150701209 | 0.000788484 |
| P2RY14  | Eosinophil | -0.187892986 | 1.77156E-05 | -0.189416548 | 2.30146E-05 |
| DACH1   | Eosinophil | -0.228716253 | 1.54177E-07 | -0.228491894 | 2.92118E-07 |

|          |            |              |             |              |             |
|----------|------------|--------------|-------------|--------------|-------------|
| DAPK2    | Eosinophil | -0.455230438 | 1.0372E-27  | -0.467688116 | 3.67718E-28 |
| EMR3     | Eosinophil | -0.144449134 | 0.001011302 | -0.149151717 | 0.000894073 |
| ADAMTS3  | Mast cell  | 0.032389242  | 0.463292996 | 0.046244426  | 0.305488383 |
| CPA3     | Mast cell  | -0.24865852  | 1.06951E-08 | -0.236571259 | 1.0664E-07  |
| CMA1     | Mast cell  | -0.244959279 | 1.78623E-08 | -0.231468373 | 2.02388E-07 |
| CTSG     | Mast cell  | -0.304242469 | 1.71954E-12 | -0.291562556 | 4.07656E-11 |
| ARHGAP15 | Mast cell  | -0.256721271 | 3.39773E-09 | -0.278932313 | 2.91737E-10 |
| CPM      | Mast cell  | -0.100989809 | 0.021898875 | -0.112698767 | 0.012281596 |
| FCN1     | Mast cell  | -0.232780371 | 9.12362E-08 | -0.213641091 | 1.69346E-06 |
| FTL      | Mast cell  | -0.10174351  | 0.020926236 | -0.120069637 | 0.007610631 |
| HSPA6    | Mast cell  | -0.053059999 | 0.229346491 | -0.050240043 | 0.26554461  |
| ITGA9    | Mast cell  | -0.198697355 | 5.53056E-06 | -0.183953116 | 3.97081E-05 |
| RNASE3   | Mast cell  | 0.027421307  | 0.534669928 | 0.043596318  | 0.334045443 |
| S100A4   | Mast cell  | -0.131397021 | 0.002811863 | -0.12083318  | 0.00723197  |
| SIGLEC8  | Mast cell  | -0.217657195 | 6.12159E-07 | -0.225138101 | 4.39091E-07 |
| SLC6A4   | Mast cell  | -0.230377702 | 1.2456E-07  | -0.234842785 | 1.32706E-07 |
| PTGS2    | Mast cell  | 0.112653604  | 0.010513878 | 0.103789572  | 0.021173268 |
| EGR3     | Mast cell  | -0.160416888 | 0.00025689  | -0.160771964 | 0.000338378 |
| PILRA    | Mast cell  | -0.083488339 | 0.058310717 | -0.076990839 | 0.087697585 |
| ASGR2    | Monocyte   | -0.009754818 | 0.825217488 | 0.001889262  | 0.96662468  |
| CFP      | Monocyte   | -0.288581863 | 2.46231E-11 | -0.290391793 | 4.91279E-11 |
| ASGR1    | Monocyte   | -0.122652172 | 0.005316768 | -0.120472142 | 0.007408865 |
| CD1D     | Monocyte   | -0.223615493 | 2.93801E-07 | -0.22035824  | 7.7646E-07  |
| UPK3A    | Monocyte   | -0.159879862 | 0.000269589 | -0.159380468 | 0.000381485 |
| ACTG1    | Monocyte   | 0.292063464  | 1.38174E-11 | 0.30123239   | 8.44637E-12 |
| ANXA5    | Monocyte   | 0.066548739  | 0.13149469  | 0.08664222   | 0.054542544 |
| ATP6V1B2 | Monocyte   | -0.041821327 | 0.343544402 | -0.028436802 | 0.528744255 |
| CFL1     | Monocyte   | 0.359021508  | 4.11079E-17 | 0.357645445  | 2.53911E-16 |
| DAZAP2   | Monocyte   | 0.163073811  | 0.000201883 | 0.162208251  | 0.000298679 |
| CTBS     | Monocyte   | 0.202909863  | 3.45148E-06 | 0.211498233  | 2.16049E-06 |
| EMR4P    | Monocyte   | -0.282419368 | 6.71562E-11 | -0.302429545 | 6.92218E-12 |
| HIVEP2   | Monocyte   | 0.159801208  | 0.000271498 | 0.17828119   | 6.88086E-05 |
| MARCKSL1 | Monocyte   | 0.273078179  | 2.93363E-10 | 0.270489137  | 1.02961E-09 |



|           |            |              |             |              |             |
|-----------|------------|--------------|-------------|--------------|-------------|
| MBP       | Monocyte   | -0.011622812 | 0.792449193 | 0.009504944  | 0.833267279 |
| MMP15     | Monocyte   | -0.096826586 | 0.028008277 | -0.102948664 | 0.02224806  |
| PNPLA6    | Monocyte   | -0.150132136 | 0.000630474 | -0.152954584 | 0.000655385 |
| TMBIM6    | Monocyte   | 0.200696423  | 4.42726E-06 | 0.2033064    | 5.35737E-06 |
| PQBP1     | Monocyte   | 0.01737092   | 0.694112175 | 0.003538296  | 0.937538716 |
| TEX264    | Monocyte   | -0.229408059 | 1.41101E-07 | -0.226800419 | 3.5906E-07  |
| IKZF1     | Monocyte   | -0.15643381  | 0.000366105 | -0.157127573 | 0.00046227  |
| CREB5     | Neutrophil | -0.001715612 | 0.969018873 | 0.022628259  | 0.616217946 |
| CDA       | Neutrophil | 0.192793215  | 1.05324E-05 | 0.210914069  | 2.30781E-06 |
| CHST15    | Neutrophil | 0.152732571  | 0.000505061 | 0.169445252  | 0.000156757 |
| S100A12   | Neutrophil | 0.122565766  | 0.00534932  | 0.138261104  | 0.002091712 |
| APOBEC3A  | Neutrophil | 0.048520587  | 0.271733525 | 0.052299194  | 0.246425143 |
| CASP5     | Neutrophil | 0.143738898  | 0.001071566 | 0.173334311  | 0.000109644 |
| MMP25     | Neutrophil | -0.02799615  | 0.526136813 | -0.021333195 | 0.636551983 |
| HAL       | Neutrophil | 0.137373288  | 0.001779579 | 0.129653659  | 0.003930937 |
| C1orf183  | Neutrophil | -0.225480373 | 2.32506E-07 | -0.222891226 | 5.74927E-07 |
| FFAR2     | Neutrophil | 0.089593884  | 0.042117527 | 0.101219434  | 0.024607704 |
| MAK       | Neutrophil | -0.093932418 | 0.033072665 | -0.096176779 | 0.032760875 |
| CXCR1     | Neutrophil | 0.005255914  | 0.905285921 | 0.021328476  | 0.636626583 |
| STEAP4    | Neutrophil | -0.17379669  | 7.34875E-05 | -0.177011199 | 7.76447E-05 |
| MGAM      | Neutrophil | -0.11652866  | 0.008119645 | -0.125898528 | 0.005118947 |
| BTNL8     | Neutrophil | -0.210231523 | 1.48523E-06 | -0.219812283 | 8.28032E-07 |
| CXCR2     | Neutrophil | -0.123412987 | 0.005037755 | -0.108151298 | 0.016292214 |
| TNFRSF10C | Neutrophil | -0.179865073 | 4.03619E-05 | -0.175817815 | 8.69133E-05 |
| VNN3      | Neutrophil | -0.053907954 | 0.221979382 | -0.051658519 | 0.252267919 |

TCGA: The Cancer Genome Atlas; LUAD: lung adenocarcinoma.
